# Supplementary material for: Common and divergent gene regulatory networks control injury-induced and developmental neurogenesis in zebrafish retina
Source: bioRxiv preprint, doi:10.1101/2023.08.08.552451, version 1 (2023-08-08)
Supplement: Table ST3 [file 552451_file18.xlsx]

## Sheet: list
Table ST3: Genes, peaks, and motifs selectively enriched in LD vs. NMDA samples (snRNA/ATAC-Seq+scRNA-Seq).
tab1: Common cell type specific genes between LD and NMDA (snRNA-seq)
tab2: Common cell type specific peaks between LD and NMDA (snATAC-seq)
tab3: Common cell type specific motifs between LD and NMDA (snATAC-seq)
tab4: Common cell type specific genes between LD and NMDA (scRNA-seq)
tab5: Differential MG genes between LD and NMDA (snRNA-seq)
tab6: Differential MG peaks between LD and NMDA (snATAC-seq)
tab7: Differential MG motifs between LD and NMDA (snATAC-seq)
tab8: Differential MG genes between LD and NMDA (scRNA-seq)

## Sheet: tab1
gene	LD::p_val	LD::avg_log2FC	LD::pct.1	LD::pct.2	LD::p_val_adj	LD::cluster	LD::gene_short	NMDA::p_val	NMDA::avg_log2FC	NMDA::pct.1	NMDA::pct.2	NMDA::p_val_adj	NMDA::cluster	NMDA::gene_short
ENSDARG00000000183~~ptpn4b	1.91806e-242	1.05039	0.583	0.103	6.23754e-238	MG	ptpn4b	0	1.1627	0.574	0.072	0	MG	ptpn4b
ENSDARG00000000442~~slc39a13	0	1.2366	0.535	0.066	0	MG	slc39a13	3.08645e-306	1.10955	0.528	0.067	1.00371e-301	MG	slc39a13
ENSDARG00000001437~~slc2a1a	0	1.60827	0.546	0.007	0	MG	slc2a1a	0	1.69289	0.656	0.014	0	MG	slc2a1a
ENSDARG00000001634~~kirrel1a	0	1.28237	0.839	0.231	0	MG	kirrel1a	1.09327e-240	1.04255	0.765	0.224	3.55533e-236	MG	kirrel1a
ENSDARG00000001676~~gpm6bb	0	2.66592	0.998	0.479	0	MG	gpm6bb	0	2.91368	0.993	0.374	0	MG	gpm6bb
ENSDARG00000001733~~gulp1a	0	3.40829	0.998	0.097	0	MG	gulp1a	0	3.17491	0.992	0.08	0	MG	gulp1a
ENSDARG00000001776~~stim2b	8.28885e-267	1.16744	0.885	0.313	2.69553e-262	MG	stim2b	4.12527e-245	1.06953	0.806	0.253	1.34154e-240	MG	stim2b
ENSDARG00000001873~~phgdh	5.68947e-90	0.717192	0.359	0.106	1.85022e-85	MG	phgdh	2.59796e-168	0.817278	0.424	0.085	8.44858e-164	MG	phgdh
ENSDARG00000001879~~nav2b	2.29934e-140	0.717078	0.216	0.019	7.47745e-136	MG	nav2b	2.47691e-85	0.513099	0.192	0.033	8.0549e-81	MG	nav2b
ENSDARG00000001909~~vill	0	2.48663	0.849	0.072	0	MG	vill	0	2.91467	0.904	0.082	0	MG	vill
ENSDARG00000001953~~pfkfb3	7.27435e-94	0.609876	0.249	0.047	2.36562e-89	MG	pfkfb3	1.75558e-191	0.96307	0.304	0.032	5.70916e-187	MG	pfkfb3
ENSDARG00000001968~~dock5	8.351e-175	0.847682	0.287	0.03	2.71574e-170	MG	dock5	2.2052e-153	0.730874	0.256	0.029	7.17131e-149	MG	dock5
ENSDARG00000001975~~hsd11b2	0	2.98798	0.937	0.072	0	MG	hsd11b2	0	2.97394	0.938	0.104	0	MG	hsd11b2
ENSDARG00000002013~~grb10a	0	1.2961	0.689	0.127	0	MG	grb10a	6.31807e-306	1.18163	0.572	0.089	2.05464e-301	MG	grb10a
ENSDARG00000002026~~qkib	0	2.06	0.987	0.185	0	MG	qkib	0	1.74712	0.958	0.188	0	MG	qkib
ENSDARG00000002084~~lamb2	5.24371e-131	0.658727	0.186	0.013	1.70525e-126	MG	lamb2	1.41646e-137	0.606098	0.196	0.015	4.60634e-133	MG	lamb2
ENSDARG00000002197~~pygl	0	1.5123	0.622	0.044	0	MG	pygl	0	1.42068	0.643	0.065	0	MG	pygl
ENSDARG00000002609~~rnf145a	9.6422e-123	0.776831	0.632	0.219	3.13564e-118	MG	rnf145a	8.03561e-142	0.668765	0.646	0.199	2.61318e-137	MG	rnf145a
ENSDARG00000002731~~sdc2	6.3461e-198	1.00595	0.748	0.264	2.06375e-193	MG	sdc2	2.71374e-186	0.866273	0.669	0.195	8.82508e-182	MG	sdc2
ENSDARG00000002945~~bgnb	0	2.09022	0.677	0.008	0	MG	bgnb	0	2.15453	0.8	0.009	0	MG	bgnb
ENSDARG00000003046~~sorbs2a	0	1.85557	0.958	0.143	0	MG	sorbs2a	0	1.9256	0.913	0.098	0	MG	sorbs2a
ENSDARG00000003281~~pik3ip1	0	3.21672	0.998	0.147	0	MG	pik3ip1	0	3.21227	0.993	0.154	0	MG	pik3ip1
ENSDARG00000003512~~anks1b	0	1.41433	0.759	0.134	0	MG	anks1b	0	1.55491	0.706	0.13	0	MG	anks1b
ENSDARG00000003705~~prnprs3	5.15291e-92	0.696928	0.423	0.136	1.67573e-87	MG	prnprs3	3.61164e-195	0.866174	0.655	0.176	1.17451e-190	MG	prnprs3
ENSDARG00000003754~~tspan2a	0	1.47708	0.942	0.284	0	MG	tspan2a	8.69004e-297	1.16751	0.941	0.311	2.826e-292	MG	tspan2a
ENSDARG00000003835~~stom	1.94607e-90	0.649869	0.351	0.095	6.32863e-86	MG	stom	0	1.28137	0.601	0.062	0	MG	stom
ENSDARG00000004018~~CHST13	3.80466e-50	0.510932	0.207	0.061	1.23727e-45	MG	CHST13	1.18119e-65	0.512446	0.234	0.064	3.84124e-61	MG	CHST13
ENSDARG00000004060~~bhlhe40	1.41089e-199	0.894177	0.261	0.015	4.58821e-195	MG	bhlhe40	3.54295e-174	0.769929	0.352	0.052	1.15217e-169	MG	bhlhe40
ENSDARG00000004115~~mgat4b	9.01157e-123	0.760626	0.358	0.075	2.93056e-118	MG	mgat4b	3.44339e-88	0.557646	0.422	0.137	1.11979e-83	MG	mgat4b
ENSDARG00000004177~~fam169ab	3.28171e-287	1.05825	0.359	0.018	1.06721e-282	MG	fam169ab	2.83103e-288	0.98359	0.325	0.013	9.2065e-284	MG	fam169ab
ENSDARG00000004196~~tnfsf10l	1.3033e-126	0.685809	0.228	0.027	4.23834e-122	MG	tnfsf10l	1.8785e-118	0.603633	0.223	0.03	6.1089e-114	MG	tnfsf10l
ENSDARG00000004246~~slit2	0	1.62266	0.909	0.194	0	MG	slit2	0	1.33974	0.876	0.22	0	MG	slit2
ENSDARG00000004372~~fmnl3	1.8901e-257	1.15965	0.623	0.132	6.14659e-253	MG	fmnl3	4.5385e-269	1.09758	0.587	0.109	1.47592e-264	MG	fmnl3
ENSDARG00000004415~~tcf7l2	0	0.760661	0.896	0.229	0	MG	tcf7l2	1.20723e-248	0.970198	0.78	0.207	3.9259e-244	MG	tcf7l2
ENSDARG00000004451~~tnfrsfa	4.68011e-71	0.607841	0.317	0.1	1.52197e-66	MG	tnfrsfa	2.8408e-158	0.851857	0.42	0.092	9.23828e-154	MG	tnfrsfa
ENSDARG00000004672~~ptk2ab	4.72092e-76	0.59737	0.598	0.265	1.53524e-71	MG	ptk2ab	1.06721e-99	0.609185	0.602	0.228	3.47056e-95	MG	ptk2ab
ENSDARG00000004771~~ankrd10b	1.36167e-150	0.783867	0.838	0.343	4.42815e-146	MG	ankrd10b	6.74108e-148	0.748106	0.743	0.256	2.1922e-143	MG	ankrd10b
ENSDARG00000004930~~lmo7a	2.39381e-267	1.06208	0.338	0.018	7.78466e-263	MG	lmo7a	4.98203e-279	0.966826	0.308	0.011	1.62016e-274	MG	lmo7a
ENSDARG00000005104~~limk2	5.25507e-225	1.06561	0.542	0.106	1.70895e-220	MG	limk2	1.47103e-172	0.800994	0.478	0.105	4.78379e-168	MG	limk2
ENSDARG00000005154~~aspa	3.78097e-108	0.614697	0.172	0.015	1.22957e-103	MG	aspa	4.51627e-131	0.613303	0.198	0.018	1.46869e-126	MG	aspa
ENSDARG00000005232~~ccdc85ca	0	1.49242	0.997	0.749	0	MG	ccdc85ca	0	1.33128	0.994	0.678	0	MG	ccdc85ca
ENSDARG00000005350~~dip2ba	9.38098e-102	0.670434	0.87	0.468	3.0507e-97	MG	dip2ba	2.705e-74	0.504234	0.819	0.399	8.79667e-70	MG	dip2ba
ENSDARG00000005356~~tyro3	9.17675e-167	0.905771	0.38	0.066	2.98428e-162	MG	tyro3	4.68463e-137	0.778781	0.359	0.076	1.52344e-132	MG	tyro3
ENSDARG00000005416~~map3k5	3.98986e-79	0.659877	0.41	0.143	1.2975e-74	MG	map3k5	4.82408e-269	1.02702	0.565	0.094	1.56879e-264	MG	map3k5
ENSDARG00000005482~~rapgef2	2.18623e-226	0.789845	0.998	0.754	7.10961e-222	MG	rapgef2	4.36925e-245	0.858293	0.987	0.616	1.42088e-240	MG	rapgef2
ENSDARG00000005574~~vsx2	2.15799e-120	0.811205	0.4	0.105	7.01778e-116	MG	vsx2	4.87439e-120	0.730529	0.399	0.103	1.58515e-115	MG	vsx2
ENSDARG00000005762~~col14a1a	0	1.95878	0.66	0.03	0	MG	col14a1a	0	1.68358	0.742	0.065	0	MG	col14a1a
ENSDARG00000005789~~enpp1	1.55229e-192	0.802263	0.22	0.008	5.04805e-188	MG	enpp1	0	0.952474	0.307	0.005	0	MG	enpp1
ENSDARG00000006044~~usta	0	1.57701	0.683	0.075	0	MG	usta	0	1.19162	0.534	0.063	0	MG	usta
ENSDARG00000006272~~mpp5a	0	1.56318	0.992	0.409	0	MG	mpp5a	0	1.28106	0.969	0.352	0	MG	mpp5a
ENSDARG00000006314~~itgav	0	1.38253	0.736	0.126	0	MG	itgav	0	1.34443	0.769	0.144	0	MG	itgav
ENSDARG00000006397~~laptm4a	2.13438e-166	0.922087	0.48	0.107	6.94101e-162	MG	laptm4a	1.09026e-270	1.05002	0.685	0.146	3.54554e-266	MG	laptm4a
ENSDARG00000006508~~pip5k1bb	7.39421e-220	0.988122	0.315	0.024	2.4046e-215	MG	pip5k1bb	2.3673e-116	0.556481	0.181	0.017	7.69847e-112	MG	pip5k1bb
ENSDARG00000006514~~her6	3.31093e-192	1.02644	0.481	0.101	1.07671e-187	MG	her6	0	1.18359	0.57	0.08	0	MG	her6
ENSDARG00000006754~~mllt3	3.80331e-211	1.0271	0.738	0.2	1.23684e-206	MG	mllt3	1.56008e-240	0.93821	0.652	0.134	5.07338e-236	MG	mllt3
ENSDARG00000006892~~myo3b	6.37279e-201	1.03219	0.481	0.093	2.07243e-196	MG	myo3b	6.55776e-218	0.897927	0.505	0.089	2.13258e-213	MG	myo3b
ENSDARG00000007098~~itm2ba	4.32225e-254	1.13054	0.956	0.456	1.4056e-249	MG	itm2ba	0	1.19349	0.978	0.49	0	MG	itm2ba
ENSDARG00000007184~~zbtb16a	0	1.49746	0.671	0.099	0	MG	zbtb16a	1.6687e-300	1.32812	0.574	0.095	5.42661e-296	MG	zbtb16a
ENSDARG00000007195~~grm2b	0	2.35365	0.915	0.031	0	MG	grm2b	0	2.54642	0.938	0.036	0	MG	grm2b
ENSDARG00000007461~~srgap1a	8.5106e-219	1.03165	0.725	0.213	2.76765e-214	MG	srgap1a	1.07316e-177	0.907825	0.634	0.194	3.48991e-173	MG	srgap1a
ENSDARG00000007678~~ttyh3b	5.50976e-120	0.704939	0.962	0.569	1.79177e-115	MG	ttyh3b	2.22199e-100	0.597991	0.979	0.569	7.22591e-96	MG	ttyh3b
ENSDARG00000007711~~rab3il1	7.12813e-254	0.984408	0.306	0.014	2.31807e-249	MG	rab3il1	0	1.10672	0.404	0.016	0	MG	rab3il1
ENSDARG00000007723~~efnb1	3.80016e-187	1.02305	0.943	0.495	1.23581e-182	MG	efnb1	1.0937e-213	1.0255	0.955	0.497	3.55673e-209	MG	efnb1
ENSDARG00000007753~~cpne2	6.40591e-299	1.02121	0.303	0.005	2.0832e-294	MG	cpne2	2.59451e-179	0.694547	0.188	0.005	8.43735e-175	MG	cpne2
ENSDARG00000007795~~cst3	3.45606e-69	0.570886	0.285	0.078	1.12391e-64	MG	cst3	2.27764e-166	0.899049	0.408	0.083	7.40687e-162	MG	cst3
ENSDARG00000007836~~ctsla	1.02009e-224	1.24875	0.705	0.201	3.31734e-220	MG	ctsla	7.842e-206	1.16378	0.863	0.379	2.55022e-201	MG	ctsla
ENSDARG00000008026~~niban2b	3.04951e-62	0.5586	0.31	0.105	9.91701e-58	MG	niban2b	6.3475e-81	0.574549	0.298	0.085	2.06421e-76	MG	niban2b
ENSDARG00000008363~~mcl1b	3.20085e-139	0.676638	0.198	0.014	1.04092e-134	MG	mcl1b	3.65449e-106	0.599283	0.229	0.037	1.18844e-101	MG	mcl1b
ENSDARG00000008372~~spred2b	2.5245e-121	0.757515	0.686	0.268	8.20969e-117	MG	spred2b	1.93974e-179	0.837922	0.723	0.229	6.30803e-175	MG	spred2b
ENSDARG00000008816~~glud1a	5.01108e-109	0.571989	0.165	0.014	1.6296e-104	MG	glud1a	3.24098e-172	0.748879	0.23	0.016	1.05397e-167	MG	glud1a
ENSDARG00000008904~~smarca2	7.36375e-79	0.588992	0.601	0.254	2.39469e-74	MG	smarca2	1.28967e-128	0.659319	0.632	0.21	4.19402e-124	MG	smarca2
ENSDARG00000009018~~rhbg	0	2.95689	0.981	0.129	0	MG	rhbg	0	2.85218	0.993	0.171	0	MG	rhbg
ENSDARG00000009106~~serinc1	1.51786e-117	0.740673	0.501	0.145	4.93609e-113	MG	serinc1	1.05038e-173	0.798049	0.734	0.223	3.41585e-169	MG	serinc1
ENSDARG00000009677~~dlg1	3.96701e-208	0.982024	0.873	0.311	1.29007e-203	MG	dlg1	1.0403e-170	0.871288	0.878	0.355	3.38306e-166	MG	dlg1
ENSDARG00000009693~~llgl1	0	1.79456	0.995	0.361	0	MG	llgl1	0	1.56426	0.995	0.424	0	MG	llgl1
ENSDARG00000009899~~znf385a	0	1.86432	0.992	0.259	0	MG	znf385a	0	1.94533	0.976	0.243	0	MG	znf385a
ENSDARG00000009930~~cadm2a	1.4643e-202	0.992301	0.576	0.122	4.76189e-198	MG	cadm2a	1.72417e-167	0.753705	0.593	0.153	5.60701e-163	MG	cadm2a
ENSDARG00000009978~~icn	1.0417e-120	0.502393	0.125	0.002	3.38759e-116	MG	icn	0	1.53478	0.441	0.015	0	MG	icn
ENSDARG00000010008~~vim	5.22016e-308	1.1837	0.615	0.094	1.6976e-303	MG	vim	0	1.10677	0.724	0.138	0	MG	vim
ENSDARG00000010018~~qki2	0	1.66177	0.931	0.207	0	MG	qki2	0	1.47583	0.941	0.205	0	MG	qki2
ENSDARG00000010132~~dacha	0	1.96742	0.989	0.349	0	MG	dacha	0	1.73881	0.972	0.328	0	MG	dacha
ENSDARG00000010565~~aqp4	0	2.88496	0.973	0.029	0	MG	aqp4	0	2.65008	0.946	0.027	0	MG	aqp4
ENSDARG00000010654~~arhgap42b	0	2.00418	0.913	0.151	0	MG	arhgap42b	0	1.94649	0.871	0.099	0	MG	arhgap42b
ENSDARG00000010752~~acsl4b	0	1.59798	0.612	0.052	0	MG	acsl4b	4.88136e-222	0.915307	0.39	0.049	1.58742e-217	MG	acsl4b
ENSDARG00000010767~~epha4l	5.55684e-102	0.670181	0.335	0.079	1.80708e-97	MG	epha4l	9.56225e-190	0.848907	0.373	0.055	3.10964e-185	MG	epha4l
ENSDARG00000011027~~fgfr1a	2.46285e-117	0.791715	0.338	0.076	8.0092e-113	MG	fgfr1a	4.54865e-161	0.834862	0.32	0.05	1.47922e-156	MG	fgfr1a
ENSDARG00000011065~~camk2b1	2.63161e-115	0.690453	0.799	0.325	8.558e-111	MG	camk2b1	2.16499e-140	0.6678	0.784	0.25	7.04056e-136	MG	camk2b1
ENSDARG00000011163~~sema3fa	0	1.83276	0.975	0.245	0	MG	sema3fa	0	1.8704	0.978	0.226	0	MG	sema3fa
ENSDARG00000011166~~cahz	0	3.02406	0.977	0.044	0	MG	cahz	0	3.26658	0.983	0.055	0	MG	cahz
ENSDARG00000011190~~fgfr1b	0	1.29468	0.743	0.156	0	MG	fgfr1b	2.70665e-233	1.01688	0.628	0.145	8.80202e-229	MG	fgfr1b
ENSDARG00000011373~~mknk2a	1.92951e-81	0.642577	0.428	0.145	6.27476e-77	MG	mknk2a	2.93893e-141	0.654738	0.438	0.1	9.5574e-137	MG	mknk2a
ENSDARG00000011407~~col2a1b	3.64078e-157	0.667425	0.178	0.006	1.18398e-152	MG	col2a1b	0	1.17986	0.394	0.007	0	MG	col2a1b
ENSDARG00000011498~~si:ch211-212o1.2	2.12026e-126	0.819273	0.386	0.091	6.8951e-122	MG	si:ch211-212o1.2	9.20548e-195	0.884825	0.447	0.083	2.99362e-190	MG	si:ch211-212o1.2
ENSDARG00000011533~~sema6dl	0	1.25327	0.762	0.179	0	MG	sema6dl	1.12531e-254	1.0757	0.812	0.245	3.65951e-250	MG	sema6dl
ENSDARG00000011545~~arrb2b	1.48319e-206	0.989786	0.731	0.211	4.82334e-202	MG	arrb2b	4.96632e-210	0.884842	0.812	0.246	1.61505e-205	MG	arrb2b
ENSDARG00000011797~~tent5bb	5.96005e-111	0.537836	0.145	0.008	1.93821e-106	MG	tent5bb	2.31503e-159	0.639758	0.179	0.006	7.52849e-155	MG	tent5bb
ENSDARG00000011824~~pbxip1b	3.21876e-142	0.824733	0.297	0.045	1.04674e-137	MG	pbxip1b	1.366e-163	0.77683	0.349	0.056	4.44223e-159	MG	pbxip1b
ENSDARG00000011845~~chn2	3.59726e-108	0.735948	0.457	0.127	1.16983e-103	MG	chn2	9.1683e-269	0.968206	0.531	0.074	2.98153e-264	MG	chn2
ENSDARG00000011876~~ednraa	0	1.45999	0.494	0.047	0	MG	ednraa	0	1.28268	0.474	0.042	0	MG	ednraa
ENSDARG00000011909~~itpr2	0	1.63613	0.693	0.039	0	MG	itpr2	0	1.47481	0.619	0.033	0	MG	itpr2
ENSDARG00000011961~~csrp2	0	1.40965	0.556	0.03	0	MG	csrp2	0	1.62977	0.713	0.052	0	MG	csrp2
ENSDARG00000012019~~glra1	6.31127e-289	1.01177	0.63	0.104	2.05243e-284	MG	glra1	0	1.31341	0.681	0.099	0	MG	glra1
ENSDARG00000012199~~gpt2	0	1.50224	0.754	0.093	0	MG	gpt2	0	1.41057	0.679	0.065	0	MG	gpt2
ENSDARG00000012204~~CDK18	0	1.65289	0.997	0.44	0	MG	CDK18	0	1.29158	0.976	0.402	0	MG	CDK18
ENSDARG00000012244~~ube2e3	9.92911e-306	1.03093	0.991	0.673	3.22895e-301	MG	ube2e3	2.57508e-179	0.777874	0.964	0.561	8.37417e-175	MG	ube2e3
ENSDARG00000012504~~rlbp1a	0	3.18774	0.99	0.051	0	MG	rlbp1a	0	3.08384	0.994	0.089	0	MG	rlbp1a
ENSDARG00000012555~~ak5	1.61177e-165	0.747463	0.217	0.013	5.24149e-161	MG	ak5	8.18851e-79	0.510852	0.166	0.027	2.6629e-74	MG	ak5
ENSDARG00000012593~~col5a1	4.06585e-121	0.823156	0.427	0.12	1.32222e-116	MG	col5a1	1.85455e-70	0.58532	0.354	0.124	6.03099e-66	MG	col5a1
ENSDARG00000012671~~inhbaa	0	2.06605	0.771	0.029	0	MG	inhbaa	0	1.63034	0.654	0.052	0	MG	inhbaa
ENSDARG00000012801~~pfkpb	3.82004e-289	1.17804	0.812	0.185	1.24228e-284	MG	pfkpb	0	1.69746	0.933	0.199	0	MG	pfkpb
ENSDARG00000012824~~itga3b	0	1.6695	0.649	0.018	0	MG	itga3b	0	1.70055	0.698	0.017	0	MG	itga3b
ENSDARG00000012914~~arhgef4	0	1.55265	0.991	0.3	0	MG	arhgef4	0	1.2757	0.959	0.311	0	MG	arhgef4
ENSDARG00000012942~~itgb5	0	1.85815	0.954	0.183	0	MG	itgb5	0	2.00739	0.954	0.165	0	MG	itgb5
ENSDARG00000013072~~mmp15b	1.4099e-93	0.661932	0.229	0.041	4.58499e-89	MG	mmp15b	2.0745e-134	0.678778	0.247	0.032	6.74628e-130	MG	mmp15b
ENSDARG00000013168~~jag1b	6.2439e-117	0.792564	0.418	0.116	2.03052e-112	MG	jag1b	3.41097e-147	0.755233	0.456	0.112	1.10925e-142	MG	jag1b
ENSDARG00000013414~~lin7a	0	2.53251	0.968	0.064	0	MG	lin7a	0	2.66138	0.938	0.08	0	MG	lin7a
ENSDARG00000013892~~sorl1	1.36973e-136	0.80503	0.687	0.249	4.45437e-132	MG	sorl1	2.7811e-102	0.545179	0.696	0.26	9.04415e-98	MG	sorl1
ENSDARG00000013968~~psap	1.67577e-131	0.758744	0.322	0.057	5.44959e-127	MG	psap	1.38977e-129	0.693316	0.512	0.15	4.51953e-125	MG	psap
ENSDARG00000014239~~esyt1b	1.8081e-109	0.605886	0.205	0.025	5.87993e-105	MG	esyt1b	3.33609e-96	0.515605	0.196	0.029	1.0849e-91	MG	esyt1b
ENSDARG00000014302~~brinp2	4.75664e-248	1.26849	0.691	0.184	1.54686e-243	MG	brinp2	5.82245e-193	0.974812	0.764	0.259	1.89346e-188	MG	brinp2
ENSDARG00000014378~~slc12a4	8.97205e-282	1.17147	0.696	0.156	2.91771e-277	MG	slc12a4	8.45212e-215	0.975242	0.654	0.169	2.74863e-210	MG	slc12a4
ENSDARG00000014554~~ppp1r3cb	2.16306e-266	0.987105	0.296	0.009	7.03428e-262	MG	ppp1r3cb	8.64267e-250	0.931444	0.31	0.017	2.8106e-245	MG	ppp1r3cb
ENSDARG00000014577~~rhpn2	0	1.40263	0.56	0.037	0	MG	rhpn2	0	1.38566	0.593	0.044	0	MG	rhpn2
ENSDARG00000015002~~cdh4	0	1.57407	0.949	0.263	0	MG	cdh4	8.31541e-305	1.2818	0.956	0.304	2.70417e-300	MG	cdh4
ENSDARG00000015176~~ror1	0	2.79658	0.995	0.171	0	MG	ror1	0	2.57131	0.992	0.217	0	MG	ror1
ENSDARG00000015240~~cdkl5	8.28884e-161	0.852802	0.353	0.055	2.69553e-156	MG	cdkl5	5.72952e-162	0.754135	0.39	0.073	1.86324e-157	MG	cdkl5
ENSDARG00000015312~~klf12a	2.10234e-182	0.863692	0.284	0.026	6.8368e-178	MG	klf12a	1.69911e-139	0.697942	0.238	0.028	5.5255e-135	MG	klf12a
ENSDARG00000015546~~alpl	2.7085e-257	1.19257	0.819	0.242	8.80805e-253	MG	alpl	4.25182e-292	1.10257	0.726	0.153	1.38269e-287	MG	alpl
ENSDARG00000015552~~phactr4a	1.884e-245	1.06248	0.825	0.253	6.12676e-241	MG	phactr4a	1.74226e-181	0.802572	0.722	0.209	5.66583e-177	MG	phactr4a
ENSDARG00000015790~~atp1b3a	0	2.55123	0.928	0.059	0	MG	atp1b3a	0	2.76722	0.971	0.081	0	MG	atp1b3a
ENSDARG00000015822~~sesn3	1.43486e-205	0.985633	0.383	0.051	4.66617e-201	MG	sesn3	2.68512e-306	1.1802	0.556	0.082	8.732e-302	MG	sesn3
ENSDARG00000015887~~b2ml	1.55263e-129	0.804647	0.532	0.161	5.04916e-125	MG	b2ml	5.91093e-145	0.785914	0.724	0.272	1.92223e-140	MG	b2ml
ENSDARG00000015891~~ptprea	6.02582e-300	1.2078	0.596	0.088	1.9596e-295	MG	ptprea	1.40332e-227	0.974243	0.493	0.083	4.56361e-223	MG	ptprea
ENSDARG00000016085~~mbnl3	2.10469e-101	0.690652	0.417	0.118	6.84445e-97	MG	mbnl3	6.96655e-85	0.500639	0.379	0.115	2.26552e-80	MG	mbnl3
ENSDARG00000016188~~SBNO2	1.13539e-88	0.771174	0.555	0.247	3.6923e-84	MG	SBNO2	1.93039e-83	0.562844	0.471	0.175	6.27764e-79	MG	SBNO2
ENSDARG00000016311~~dock9b	9.23856e-243	1.06054	0.45	0.059	3.00438e-238	MG	dock9b	3.52529e-187	0.852748	0.446	0.084	1.14642e-182	MG	dock9b
ENSDARG00000016404~~ptch1	0	1.71069	0.974	0.245	0	MG	ptch1	0	1.36991	0.898	0.185	0	MG	ptch1
ENSDARG00000016532~~suco	5.28757e-261	0.995669	0.981	0.594	1.71952e-256	MG	suco	0	1.21341	0.979	0.474	0	MG	suco
ENSDARG00000016749~~slco1c1	0	1.27949	0.66	0.114	0	MG	slco1c1	0	1.23432	0.671	0.107	0	MG	slco1c1
ENSDARG00000016866~~fam102ab	4.42022e-254	1.12545	0.692	0.157	1.43746e-249	MG	fam102ab	7.49592e-182	0.838601	0.503	0.107	2.43767e-177	MG	fam102ab
ENSDARG00000016904~~bckdk	0	1.46876	0.882	0.186	0	MG	bckdk	2.2417e-238	1.01124	0.657	0.151	7.29001e-234	MG	bckdk
ENSDARG00000017107~~nr2e1	5.11418e-69	0.62892	0.312	0.101	1.66313e-64	MG	nr2e1	4.87716e-114	0.703746	0.335	0.077	1.58605e-109	MG	nr2e1
ENSDARG00000017211~~plxnb1b	0	1.59056	0.994	0.32	0	MG	plxnb1b	6.08465e-305	1.21881	0.973	0.347	1.97873e-300	MG	plxnb1b
ENSDARG00000017294~~gnai2b	1.53533e-231	1.08956	0.499	0.084	4.99289e-227	MG	gnai2b	5.1346e-112	0.683395	0.379	0.1	1.66977e-107	MG	gnai2b
ENSDARG00000017312~~lmbrd2b	2.28314e-93	0.636558	0.324	0.08	7.42477e-89	MG	lmbrd2b	1.57597e-190	0.796079	0.362	0.051	5.12507e-186	MG	lmbrd2b
ENSDARG00000017321~~kdr	0	1.93124	0.771	0.039	0	MG	kdr	0	1.9421	0.738	0.048	0	MG	kdr
ENSDARG00000017446~~camk1db	2.07482e-150	0.811835	0.587	0.151	6.74733e-146	MG	camk1db	0	1.15048	0.639	0.085	0	MG	camk1db
ENSDARG00000017466~~ncam2	0	2.99368	0.997	0.214	0	MG	ncam2	0	2.07818	0.967	0.205	0	MG	ncam2
ENSDARG00000017474~~zgc:110699	4.24682e-153	0.596196	0.145	0	1.38107e-148	MG	zgc:110699	6.95266e-271	0.88041	0.262	0.003	2.26101e-266	MG	zgc:110699
ENSDARG00000017494~~tgfbr1a	1.11544e-110	0.736955	0.392	0.102	3.62742e-106	MG	tgfbr1a	9.63317e-146	0.763256	0.418	0.094	3.13271e-141	MG	tgfbr1a
ENSDARG00000017591~~fat1a	0	1.28834	0.953	0.331	0	MG	fat1a	1.79326e-189	0.892117	0.918	0.355	5.83168e-185	MG	fat1a
ENSDARG00000017785~~zgc:158689	4.86011e-183	0.964873	0.452	0.09	1.58051e-178	MG	zgc:158689	6.69899e-219	0.956736	0.512	0.097	2.17851e-214	MG	zgc:158689
ENSDARG00000017794~~sdr16c5b	3.98172e-288	1.21044	0.578	0.096	1.29486e-283	MG	sdr16c5b	9.23397e-238	1.03282	0.566	0.113	3.00289e-233	MG	sdr16c5b
ENSDARG00000017982~~cyp39a1	3.46306e-136	0.728558	0.202	0.016	1.12619e-131	MG	cyp39a1	9.70112e-203	0.996794	0.289	0.024	3.15481e-198	MG	cyp39a1
ENSDARG00000018010~~crtap	3.84362e-109	0.650929	0.183	0.019	1.24994e-104	MG	crtap	9.69764e-105	0.5772	0.178	0.02	3.15367e-100	MG	crtap
ENSDARG00000018048~~zgc:171704	4.40455e-234	0.986366	0.264	0.009	1.43236e-229	MG	zgc:171704	1.0725e-101	0.820297	0.111	0.003	3.48778e-97	MG	zgc:171704
ENSDARG00000018060~~pik3r2	0	1.66943	0.885	0.185	0	MG	pik3r2	0	1.4656	0.879	0.183	0	MG	pik3r2
ENSDARG00000018149~~slc38a4	0	2.13221	0.982	0.213	0	MG	slc38a4	0	2.70775	0.938	0.163	0	MG	slc38a4
ENSDARG00000018162~~ctnnal1	0	1.9003	0.743	0.025	0	MG	ctnnal1	0	1.4963	0.569	0.021	0	MG	ctnnal1
ENSDARG00000018174~~gnai2a	0	1.64344	0.997	0.35	0	MG	gnai2a	0	1.30654	0.985	0.444	0	MG	gnai2a
ENSDARG00000018397~~hpca	1.14517e-104	0.711729	0.549	0.187	3.72409e-100	MG	hpca	5.16771e-100	0.569055	0.471	0.15	1.68054e-95	MG	hpca
ENSDARG00000018441~~heg1	7.57507e-237	0.970474	0.289	0.014	2.46341e-232	MG	heg1	8.92673e-245	0.874978	0.275	0.011	2.90297e-240	MG	heg1
ENSDARG00000018485~~cyp2v1	3.26284e-131	0.642293	0.199	0.016	1.06107e-126	MG	cyp2v1	1.41099e-108	0.58646	0.227	0.034	4.58855e-104	MG	cyp2v1
ENSDARG00000018726~~slco3a1	1.4095e-84	0.631693	0.596	0.23	4.58369e-80	MG	slco3a1	8.5414e-167	0.749103	0.534	0.126	2.77766e-162	MG	slco3a1
ENSDARG00000019353~~sparc	0	2.2996	0.787	0.085	0	MG	sparc	0	1.98595	0.792	0.119	0	MG	sparc
ENSDARG00000019367~~tgfb3	0	2.7539	0.972	0.03	0	MG	tgfb3	0	2.54191	0.909	0.021	0	MG	tgfb3
ENSDARG00000019392~~stat5a	1.48598e-154	0.868336	0.412	0.08	4.83239e-150	MG	stat5a	8.27372e-206	0.837948	0.354	0.042	2.69061e-201	MG	stat5a
ENSDARG00000019396~~rergla	5.57362e-150	0.818976	0.28	0.034	1.81254e-145	MG	rergla	1.68776e-163	0.699679	0.236	0.019	5.48861e-159	MG	rergla
ENSDARG00000019420~~etnk1	7.61162e-68	0.557877	0.539	0.225	2.4753e-63	MG	etnk1	3.17538e-108	0.576791	0.468	0.14	1.03263e-103	MG	etnk1
ENSDARG00000019532~~fads2	7.94793e-128	0.830456	0.344	0.071	2.58467e-123	MG	fads2	1.03523e-107	0.621806	0.348	0.083	3.36656e-103	MG	fads2
ENSDARG00000019660~~rxfp2b	4.65994e-182	0.793654	0.217	0.009	1.51541e-177	MG	rxfp2b	5.32202e-289	0.941707	0.284	0.005	1.73072e-284	MG	rxfp2b
ENSDARG00000019702~~aldocb	1.47087e-233	1.10105	0.465	0.067	4.78328e-229	MG	aldocb	1.06633e-219	1.1219	0.725	0.22	3.46772e-215	MG	aldocb
ENSDARG00000019728~~bmpr1aa	0	1.40138	0.798	0.147	0	MG	bmpr1aa	0	1.11756	0.757	0.151	0	MG	bmpr1aa
ENSDARG00000019753~~kcnn3	2.11042e-229	1.12736	0.557	0.116	6.86308e-225	MG	kcnn3	0	1.37422	0.728	0.115	0	MG	kcnn3
ENSDARG00000019856~~atp1a1b	0	2.83657	0.966	0.132	0	MG	atp1a1b	0	3.09215	0.985	0.156	0	MG	atp1a1b
ENSDARG00000019881~~bsg	2.72737e-204	1.02005	0.843	0.322	8.86941e-200	MG	bsg	2.04348e-284	1.16118	0.937	0.377	6.64541e-280	MG	bsg
ENSDARG00000020009~~bmp2k	0	2.34226	0.998	0.361	0	MG	bmp2k	0	1.97893	0.99	0.364	0	MG	bmp2k
ENSDARG00000020053~~nkd1	1.29049e-186	0.956836	0.391	0.059	4.19667e-182	MG	nkd1	0	1.11017	0.484	0.044	0	MG	nkd1
ENSDARG00000020131~~fnbp1l	8.36163e-163	0.788144	0.953	0.52	2.7192e-158	MG	fnbp1l	6.89403e-96	0.604883	0.904	0.458	2.24194e-91	MG	fnbp1l
ENSDARG00000020134~~sipa1l1	1.93296e-227	1.08937	0.871	0.28	6.286e-223	MG	sipa1l1	4.89921e-156	0.827174	0.794	0.283	1.59322e-151	MG	sipa1l1
ENSDARG00000020136~~ptges	5.70213e-218	0.869476	0.253	0.01	1.85433e-213	MG	ptges	4.61428e-175	0.714215	0.226	0.014	1.50057e-170	MG	ptges
ENSDARG00000020284~~si:ch211-278j3.3	0	1.37635	0.903	0.221	0	MG	si:ch211-278j3.3	0	1.28924	0.844	0.17	0	MG	si:ch211-278j3.3
ENSDARG00000020541~~ism1	2.4628e-183	0.790975	0.241	0.014	8.00901e-179	MG	ism1	1.40379e-179	0.71296	0.216	0.01	4.56512e-175	MG	ism1
ENSDARG00000020656~~prkg1a	0	1.21038	0.658	0.107	0	MG	prkg1a	6.87669e-256	1.00718	0.536	0.086	2.2363e-251	MG	prkg1a
ENSDARG00000020759~~elf1	1.49551e-74	0.637794	0.353	0.117	4.86339e-70	MG	elf1	3.03721e-79	0.551122	0.326	0.098	9.87702e-75	MG	elf1
ENSDARG00000020771~~tnr	0	2.70705	0.734	0.027	0	MG	tnr	0	2.45536	0.659	0.021	0	MG	tnr
ENSDARG00000020845~~tns1b	1.90392e-201	0.953497	0.353	0.041	6.19156e-197	MG	tns1b	0	1.12764	0.463	0.041	0	MG	tns1b
ENSDARG00000020871~~ptprz1b	9.92462e-206	1.10466	0.581	0.137	3.22749e-201	MG	ptprz1b	0	1.47916	0.716	0.096	0	MG	ptprz1b
ENSDARG00000020946~~auts2b	1.23534e-80	0.635965	0.357	0.105	4.01733e-76	MG	auts2b	5.45387e-120	0.572347	0.425	0.103	1.7736e-115	MG	auts2b
ENSDARG00000021140~~pabpc1b	2.5276e-129	0.789556	0.306	0.054	8.21975e-125	MG	pabpc1b	7.62532e-211	0.908679	0.391	0.055	2.47975e-206	MG	pabpc1b
ENSDARG00000021143~~rtn1b	0	1.20749	0.69	0.103	0	MG	rtn1b	3.43994e-211	0.705743	0.643	0.14	1.11867e-206	MG	rtn1b
ENSDARG00000021195~~st8sia6	0	1.82546	0.76	0.061	0	MG	st8sia6	0	1.62206	0.646	0.055	0	MG	st8sia6
ENSDARG00000021241~~zgc:165604	0	2.37825	0.973	0.126	0	MG	zgc:165604	0	2.3504	0.939	0.144	0	MG	zgc:165604
ENSDARG00000021250~~slc25a48	2.59334e-103	0.520339	0.141	0.009	8.43355e-99	MG	slc25a48	3.00537e-162	0.634638	0.177	0.005	9.77345e-158	MG	slc25a48
ENSDARG00000021443~~zfp36l1b	0	1.29239	0.429	0.013	0	MG	zfp36l1b	0	1.41929	0.547	0.027	0	MG	zfp36l1b
ENSDARG00000021590~~magi2a	2.48741e-151	0.868778	0.675	0.226	8.08906e-147	MG	magi2a	3.10502e-124	0.72753	0.546	0.178	1.00975e-119	MG	magi2a
ENSDARG00000021607~~negr1	0	1.30519	0.997	0.449	0	MG	negr1	3.06288e-269	0.988728	0.988	0.524	9.96047e-265	MG	negr1
ENSDARG00000021833~~ahr2	1.62828e-184	0.979572	0.566	0.143	5.29516e-180	MG	ahr2	1.80488e-122	0.707952	0.476	0.14	5.86947e-118	MG	ahr2
ENSDARG00000021869~~rcan2	1.52565e-230	1.00947	0.44	0.057	4.96141e-226	MG	rcan2	2.55541e-156	0.706498	0.383	0.071	8.31019e-152	MG	rcan2
ENSDARG00000021987~~plecb	2.16282e-207	0.972207	0.368	0.044	7.03349e-203	MG	plecb	4.90958e-89	0.607445	0.265	0.063	1.5966e-84	MG	plecb
ENSDARG00000022085~~si:dkey-34e4.1	9.36745e-216	1.01957	0.754	0.231	3.04629e-211	MG	si:dkey-34e4.1	2.143e-159	0.794949	0.723	0.236	6.96903e-155	MG	si:dkey-34e4.1
ENSDARG00000022456~~eno1a	0	1.79276	0.886	0.121	0	MG	eno1a	0	1.64083	0.97	0.316	0	MG	eno1a
ENSDARG00000022712~~stat3	7.47893e-143	0.835774	0.87	0.489	2.43215e-138	MG	stat3	2.61977e-192	0.897352	0.923	0.403	8.51949e-188	MG	stat3
ENSDARG00000022763~~hpcal1	7.5744e-236	0.950396	0.305	0.018	2.46319e-231	MG	hpcal1	1.39776e-116	0.62301	0.204	0.025	4.54551e-112	MG	hpcal1
ENSDARG00000023443~~tjp2b	6.35345e-300	1.50769	0.983	0.502	2.06614e-295	MG	tjp2b	1.87713e-269	1.27184	0.943	0.4	6.10442e-265	MG	tjp2b
ENSDARG00000023578~~lpp	0	1.8343	0.983	0.282	0	MG	lpp	0	1.38462	0.949	0.273	0	MG	lpp
ENSDARG00000023713~~aqp1a.1	0	4.02248	0.993	0.016	0	MG	aqp1a.1	0	4.63399	0.983	0.027	0	MG	aqp1a.1
ENSDARG00000023724~~cdc42se1	0	1.44098	0.62	0.069	0	MG	cdc42se1	0	1.28961	0.548	0.048	0	MG	cdc42se1
ENSDARG00000023766~~gnsa	6.33832e-77	0.589625	0.21	0.042	2.06122e-72	MG	gnsa	3.29254e-88	0.567564	0.238	0.05	1.07073e-83	MG	gnsa
ENSDARG00000023963~~tpm4a	6.75721e-105	0.567256	0.15	0.011	2.19745e-100	MG	tpm4a	7.76607e-97	0.501902	0.146	0.013	2.52553e-92	MG	tpm4a
ENSDARG00000024276~~pcbp4	0	2.36634	0.998	0.568	0	MG	pcbp4	0	1.56381	0.995	0.626	0	MG	pcbp4
ENSDARG00000024492~~col9a2	9.42449e-168	0.644882	0.168	0.002	3.06484e-163	MG	col9a2	0	0.988498	0.295	0.001	0	MG	col9a2
ENSDARG00000024537~~emilin1a	0	1.4211	0.614	0.063	0	MG	emilin1a	0	1.4862	0.71	0.069	0	MG	emilin1a
ENSDARG00000024546~~pla2g4aa	2.0285e-299	1.08403	0.35	0.014	6.59667e-295	MG	pla2g4aa	9.9116e-278	0.941331	0.306	0.011	3.22325e-273	MG	pla2g4aa
ENSDARG00000024759~~inhbab	0	2.60725	0.875	0.034	0	MG	inhbab	0	1.97916	0.804	0.028	0	MG	inhbab
ENSDARG00000024964~~patj	0	1.62004	0.957	0.229	0	MG	patj	0	1.23023	0.931	0.245	0	MG	patj
ENSDARG00000025301~~gfap	1.38209e-171	1.00375	0.442	0.091	4.49456e-167	MG	gfap	0	1.31673	0.705	0.121	0	MG	gfap
ENSDARG00000025478~~gipr	0	1.18808	0.428	0.023	0	MG	gipr	1.85082e-231	0.909802	0.325	0.027	6.01888e-227	MG	gipr
ENSDARG00000025595~~agmo	0	1.20945	0.465	0.044	0	MG	agmo	4.11849e-307	1.13155	0.528	0.069	1.33933e-302	MG	agmo
ENSDARG00000025641~~gli2a	0	1.62342	0.996	0.286	0	MG	gli2a	1.87547e-223	0.999799	0.987	0.338	6.09902e-219	MG	gli2a
ENSDARG00000025679~~comtb	7.07388e-139	0.65379	0.196	0.013	2.30043e-134	MG	comtb	3.34194e-201	0.743474	0.22	0.007	1.0868e-196	MG	comtb
ENSDARG00000025826~~gna12a	1.1428e-202	1.06785	0.507	0.108	3.71637e-198	MG	gna12a	1.15637e-160	0.861423	0.448	0.105	3.76053e-156	MG	gna12a
ENSDARG00000025920~~tiam1b	0	1.7477	0.886	0.135	0	MG	tiam1b	0	1.31987	0.759	0.128	0	MG	tiam1b
ENSDARG00000026028~~ankrd44	2.96548e-81	0.65038	0.323	0.091	9.64376e-77	MG	ankrd44	3.07077e-103	0.619663	0.305	0.069	9.98616e-99	MG	ankrd44
ENSDARG00000026165~~col11a1a	0	1.98085	0.659	0.033	0	MG	col11a1a	0	1.66176	0.496	0.019	0	MG	col11a1a
ENSDARG00000026325~~mmp11a	1.78908e-193	0.868636	0.262	0.017	5.8181e-189	MG	mmp11a	1.3987e-142	0.657344	0.191	0.013	4.54857e-138	MG	mmp11a
ENSDARG00000026531~~alcama	0	1.21275	0.721	0.106	0	MG	alcama	0	0.786581	0.774	0.139	0	MG	alcama
ENSDARG00000026736~~il11ra	1.36078e-187	0.962036	0.745	0.261	4.42526e-183	MG	il11ra	1.712e-123	0.693807	0.571	0.186	5.56741e-119	MG	il11ra
ENSDARG00000026753~~grik4	1.19695e-270	1.7656	0.505	0.077	3.89247e-266	MG	grik4	0	1.59062	0.662	0.096	0	MG	grik4
ENSDARG00000026829~~cotl1	2.9483e-203	1.02071	0.448	0.075	9.58786e-199	MG	cotl1	3.65068e-191	0.836957	0.477	0.09	1.1872e-186	MG	cotl1
ENSDARG00000027087~~tgfb2	5.56465e-176	0.941614	0.427	0.081	1.80962e-171	MG	tgfb2	1.397e-76	0.554687	0.284	0.08	4.54305e-72	MG	tgfb2
ENSDARG00000027088~~ptgdsb.1	0	2.17138	0.51	0.004	0	MG	ptgdsb.1	5.75e-304	1.4954	0.283	0.002	1.8699e-299	MG	ptgdsb.1
ENSDARG00000027199~~smad1	1.39872e-107	0.737124	0.282	0.057	4.54864e-103	MG	smad1	8.53214e-104	0.586657	0.218	0.034	2.77465e-99	MG	smad1
ENSDARG00000027222~~adgrg1	2.13684e-117	0.761432	0.297	0.057	6.949e-113	MG	adgrg1	5.66902e-116	0.734631	0.354	0.087	1.84357e-111	MG	adgrg1
ENSDARG00000027279~~numb	2.52382e-93	0.695129	0.426	0.134	8.20747e-89	MG	numb	1.64211e-118	0.629053	0.431	0.114	5.34013e-114	MG	numb
ENSDARG00000027552~~mapk1	2.64122e-193	0.955374	0.826	0.295	8.58924e-189	MG	mapk1	8.16397e-134	0.740891	0.773	0.283	2.65492e-129	MG	mapk1
ENSDARG00000027600~~pdlim5b	1.00332e-64	0.549073	0.189	0.041	3.26279e-60	MG	pdlim5b	1.21853e-105	0.620727	0.223	0.036	3.96266e-101	MG	pdlim5b
ENSDARG00000027611~~cavin2a	0	2.61729	0.963	0.037	0	MG	cavin2a	0	2.41023	0.939	0.056	0	MG	cavin2a
ENSDARG00000027618~~grip2b	1.71059e-221	0.731848	0.559	0.102	5.56283e-217	MG	grip2b	9.06642e-110	0.549765	0.382	0.099	2.9484e-105	MG	grip2b
ENSDARG00000027724~~dgkb	4.07058e-270	1.1527	0.416	0.038	1.32375e-265	MG	dgkb	4.14776e-240	0.967095	0.36	0.033	1.34885e-235	MG	dgkb
ENSDARG00000027797~~adcy6b	0	1.31721	0.637	0.097	0	MG	adcy6b	3.27629e-263	1.05012	0.537	0.088	1.06545e-258	MG	adcy6b
ENSDARG00000028053~~bmp1b	0	1.49261	0.547	0.021	0	MG	bmp1b	0	1.55217	0.613	0.03	0	MG	bmp1b
ENSDARG00000028071~~bmp1a	1.02258e-115	0.75714	0.302	0.06	3.32544e-111	MG	bmp1a	9.91463e-158	0.781776	0.333	0.055	3.22424e-153	MG	bmp1a
ENSDARG00000028148~~pax2a	3.10853e-170	0.867289	0.317	0.041	1.01089e-165	MG	pax2a	4.35934e-215	0.866691	0.304	0.025	1.41766e-210	MG	pax2a
ENSDARG00000028393~~daam2	5.63853e-242	0.978527	0.324	0.021	1.83365e-237	MG	daam2	3.53172e-207	0.86355	0.311	0.029	1.14851e-202	MG	daam2
ENSDARG00000028845~~calcr	2.52352e-295	1.25946	0.537	0.073	8.20648e-291	MG	calcr	0	1.20149	0.568	0.081	0	MG	calcr
ENSDARG00000028857~~sgsm1a	1.57276e-165	0.885191	0.332	0.047	5.11462e-161	MG	sgsm1a	5.87323e-172	0.787456	0.324	0.044	1.90998e-167	MG	sgsm1a
ENSDARG00000029036~~rab32a	3.44587e-240	0.967921	0.305	0.017	1.1206e-235	MG	rab32a	4.75104e-175	0.786487	0.268	0.026	1.54504e-170	MG	rab32a
ENSDARG00000029072~~klf6a	1.07697e-96	0.669288	0.246	0.046	3.50231e-92	MG	klf6a	1.16194e-177	0.839157	0.355	0.055	3.77862e-173	MG	klf6a
ENSDARG00000029146~~lrp1ab	0	1.35944	0.982	0.394	0	MG	lrp1ab	0	1.4046	0.984	0.414	0	MG	lrp1ab
ENSDARG00000029402~~sort1a	5.70977e-218	1.03408	0.657	0.162	1.85682e-213	MG	sort1a	2.61145e-158	0.760036	0.57	0.151	8.49244e-154	MG	sort1a
ENSDARG00000029587~~msra	1.28907e-178	0.930332	0.755	0.228	4.19205e-174	MG	msra	4.53013e-231	0.87273	0.761	0.183	1.4732e-226	MG	msra
ENSDARG00000029668~~crim1	0	2.1106	0.968	0.274	0	MG	crim1	1.72267e-290	1.1613	0.887	0.267	5.60212e-286	MG	crim1
ENSDARG00000029689~~tkta	2.61187e-240	0.958794	0.754	0.169	8.4938e-236	MG	tkta	2.51718e-102	0.521742	0.762	0.282	8.18587e-98	MG	tkta
ENSDARG00000029766~~nr1i2	3.14436e-142	0.826698	0.311	0.05	1.02255e-137	MG	nr1i2	2.38234e-117	0.626132	0.238	0.035	7.74737e-113	MG	nr1i2
ENSDARG00000029856~~cnn3b	6.81095e-118	0.757171	0.308	0.061	2.21492e-113	MG	cnn3b	1.90663e-120	0.667576	0.315	0.062	6.20035e-116	MG	cnn3b
ENSDARG00000029952~~ampd2b	5.53513e-89	0.642735	0.229	0.042	1.80002e-84	MG	ampd2b	6.48408e-106	0.620973	0.263	0.05	2.10862e-101	MG	ampd2b
ENSDARG00000030297~~sox13	5.05946e-246	1.15532	0.721	0.188	1.64534e-241	MG	sox13	1.97318e-173	0.869988	0.653	0.192	6.41678e-169	MG	sox13
ENSDARG00000030364~~angpt1	0	1.53414	0.733	0.13	0	MG	angpt1	0	1.4751	0.734	0.121	0	MG	angpt1
ENSDARG00000030367~~metrn	0	1.31676	0.506	0.047	0	MG	metrn	6.31454e-247	0.959372	0.326	0.022	2.05349e-242	MG	metrn
ENSDARG00000030440~~rsrp1	1.28855e-97	0.608005	0.938	0.566	4.19036e-93	MG	rsrp1	3.80561e-232	1.06376	0.911	0.382	1.23758e-227	MG	rsrp1
ENSDARG00000030644~~gnai3	0	1.65224	0.748	0.055	0	MG	gnai3	0	1.23995	0.522	0.046	0	MG	gnai3
ENSDARG00000030722~~xirp1	0	2.16118	0.877	0.024	0	MG	xirp1	0	1.74669	0.699	0.014	0	MG	xirp1
ENSDARG00000030933~~ksr1b	0	2.07833	0.844	0.028	0	MG	ksr1b	0	1.90274	0.836	0.039	0	MG	ksr1b
ENSDARG00000031095~~veph1	0	1.36116	0.637	0.078	0	MG	veph1	3.72961e-215	0.941607	0.414	0.059	1.21287e-210	MG	veph1
ENSDARG00000031222~~lhx2b	0	1.41074	0.681	0.1	0	MG	lhx2b	3.83251e-279	1.09698	0.56	0.089	1.24633e-274	MG	lhx2b
ENSDARG00000031548~~ephb3a	0	1.37134	0.743	0.142	0	MG	ephb3a	1.31584e-205	0.955771	0.658	0.172	4.27913e-201	MG	ephb3a
ENSDARG00000031702~~prkg1b	0	2.45589	0.834	0.02	0	MG	prkg1b	0	2.13163	0.779	0.019	0	MG	prkg1b
ENSDARG00000031720~~clstn1	0	1.33501	0.996	0.644	0	MG	clstn1	0	1.44823	0.992	0.566	0	MG	clstn1
ENSDARG00000031756~~mef2aa	1.07077e-196	0.888108	0.96	0.515	3.48214e-192	MG	mef2aa	1.15104e-166	0.823662	0.923	0.395	3.74317e-162	MG	mef2aa
ENSDARG00000031763~~smad6b	0	1.51047	0.728	0.088	0	MG	smad6b	0	1.24738	0.543	0.047	0	MG	smad6b
ENSDARG00000031845~~mboat2a	5.45499e-81	0.672037	0.356	0.112	1.77396e-76	MG	mboat2a	9.76767e-70	0.511847	0.342	0.114	3.17645e-65	MG	mboat2a
ENSDARG00000031911~~tns3.2	0	1.44785	0.594	0.053	0	MG	tns3.2	0	1.24592	0.475	0.039	0	MG	tns3.2
ENSDARG00000032049~~enah	0	1.37383	0.937	0.304	0	MG	enah	1.78376e-115	0.678323	0.792	0.337	5.80079e-111	MG	enah
ENSDARG00000032188~~lrrc8aa	1.43652e-114	0.75474	0.54	0.184	4.67158e-110	MG	lrrc8aa	1.11903e-87	0.564988	0.469	0.166	3.63907e-83	MG	lrrc8aa
ENSDARG00000032197~~klf12b	0	1.10944	0.721	0.122	0	MG	klf12b	2.23208e-292	1.05127	0.55	0.076	7.25874e-288	MG	klf12b
ENSDARG00000032218~~acss3	2.79486e-76	0.630363	0.242	0.058	9.08888e-72	MG	acss3	8.30185e-80	0.556562	0.252	0.061	2.69976e-75	MG	acss3
ENSDARG00000032317~~tox	9.59654e-224	1.08302	0.97	0.373	3.1208e-219	MG	tox	1.24855e-146	0.775713	0.947	0.417	4.06029e-142	MG	tox
ENSDARG00000032324~~epb41l5	5.35765e-134	0.685985	0.952	0.586	1.74231e-129	MG	epb41l5	9.4752e-207	0.973325	0.948	0.394	3.08134e-202	MG	epb41l5
ENSDARG00000032578~~pax2b	1.41629e-93	0.642062	0.511	0.16	4.60578e-89	MG	pax2b	5.01321e-149	0.66329	0.396	0.078	1.6303e-144	MG	pax2b
ENSDARG00000032614~~msi2b	5.91458e-232	0.791305	0.994	0.745	1.92342e-227	MG	msi2b	1.98619e-208	0.894716	0.971	0.543	6.4591e-204	MG	msi2b
ENSDARG00000032619~~tob1a	1.19454e-262	1.10483	0.427	0.043	3.88464e-258	MG	tob1a	0	1.21068	0.621	0.078	0	MG	tob1a
ENSDARG00000032746~~tnfsf10l3	4.36888e-135	0.548053	0.14	0.002	1.42076e-130	MG	tnfsf10l3	8.17919e-159	0.609691	0.159	0.002	2.65987e-154	MG	tnfsf10l3
ENSDARG00000033172~~nr2f5	5.52638e-130	1.11216	0.414	0.115	1.79718e-125	MG	nr2f5	1.80781e-40	0.550749	0.322	0.148	5.879e-36	MG	nr2f5
ENSDARG00000033307~~igf2b	0	1.44889	0.523	0.026	0	MG	igf2b	0	1.25806	0.524	0.043	0	MG	igf2b
ENSDARG00000033327~~unc5b	1.01022e-58	0.59876	0.823	0.556	3.28523e-54	MG	unc5b	1.08931e-112	0.890981	0.782	0.423	3.54243e-108	MG	unc5b
ENSDARG00000033845~~igsf9ba	0	2.04825	0.979	0.222	0	MG	igsf9ba	0	1.85854	0.986	0.227	0	MG	igsf9ba
ENSDARG00000033950~~lamb2l	0	1.99923	0.805	0.027	0	MG	lamb2l	0	1.88792	0.801	0.026	0	MG	lamb2l
ENSDARG00000033978~~nxn	2.08736e-296	1.28163	0.902	0.247	6.7881e-292	MG	nxn	0	1.41214	0.811	0.132	0	MG	nxn
ENSDARG00000033999~~cyp26a1	0	1.70626	0.594	0.084	0	MG	cyp26a1	0	1.6245	0.637	0.106	0	MG	cyp26a1
ENSDARG00000034013~~rgmd	1.04798e-228	1.11515	0.307	0.021	3.40801e-224	MG	rgmd	2.95971e-135	0.902826	0.367	0.083	9.62498e-131	MG	rgmd
ENSDARG00000034043~~irx5a	2.46131e-132	0.687054	0.191	0.014	8.00417e-128	MG	irx5a	2.39693e-114	0.604841	0.213	0.028	7.79481e-110	MG	irx5a
ENSDARG00000034117~~rarga	7.16695e-210	1.02516	0.592	0.143	2.33069e-205	MG	rarga	1.32679e-163	0.837626	0.485	0.116	4.31472e-159	MG	rarga
ENSDARG00000034210~~si:dkey-240h12.4	0	1.18431	0.383	0.008	0	MG	si:dkey-240h12.4	2.60345e-307	0.966519	0.303	0.005	8.46643e-303	MG	si:dkey-240h12.4
ENSDARG00000034300~~sema3c	3.28225e-118	0.592863	0.176	0.014	1.06739e-113	MG	sema3c	1.89411e-184	0.774585	0.268	0.024	6.15964e-180	MG	sema3c
ENSDARG00000034423~~sncga	6.00443e-221	0.916966	0.265	0.012	1.95264e-216	MG	sncga	1.20826e-186	0.874434	0.382	0.061	3.92926e-182	MG	sncga
ENSDARG00000034503~~per2	1.92809e-244	1.10484	0.734	0.185	6.27016e-240	MG	per2	4.04412e-184	1.21553	0.356	0.055	1.31515e-179	MG	per2
ENSDARG00000034555~~pard3bb	0	1.5608	0.996	0.401	0	MG	pard3bb	0	1.32827	0.988	0.339	0	MG	pard3bb
ENSDARG00000034718~~tfpia	2.31515e-73	0.563064	0.207	0.044	7.52888e-69	MG	tfpia	1.27687e-103	0.604848	0.244	0.045	4.15239e-99	MG	tfpia
ENSDARG00000034785~~dachb	0	1.37148	0.711	0.11	0	MG	dachb	0	1.21506	0.744	0.137	0	MG	dachb
ENSDARG00000034871~~mid2	0	1.39855	0.907	0.269	0	MG	mid2	4.84224e-146	0.816947	0.826	0.335	1.5747e-141	MG	mid2
ENSDARG00000034893~~rarab	0	1.51698	0.987	0.375	0	MG	rarab	3.4765e-291	1.13891	0.943	0.359	1.13056e-286	MG	rarab
ENSDARG00000035132~~rgs3b	1.68962e-221	1.04421	0.501	0.086	5.49465e-217	MG	rgs3b	1.08662e-259	1.04617	0.554	0.095	3.53368e-255	MG	rgs3b
ENSDARG00000035175~~schip1	2.21602e-107	0.730916	0.419	0.118	7.20648e-103	MG	schip1	1.11244e-96	0.567023	0.401	0.119	3.61764e-92	MG	schip1
ENSDARG00000035308~~grb10b	0	1.69507	0.994	0.438	0	MG	grb10b	0	1.46811	0.982	0.352	0	MG	grb10b
ENSDARG00000035452~~camkk1a	2.9386e-65	0.578297	0.295	0.09	9.55634e-61	MG	camkk1a	6.30562e-147	0.786487	0.419	0.095	2.05059e-142	MG	camkk1a
ENSDARG00000035578~~hs3st1l2	3.11251e-131	0.786966	0.415	0.095	1.01219e-126	MG	hs3st1l2	1.40929e-98	0.626002	0.371	0.102	4.58302e-94	MG	hs3st1l2
ENSDARG00000036036~~mdka	0	1.7007	0.998	0.28	0	MG	mdka	0	1.47927	0.995	0.385	0	MG	mdka
ENSDARG00000036090~~pard6gb	0	1.54226	0.945	0.264	0	MG	pard6gb	2.63318e-304	1.15196	0.912	0.268	8.56309e-300	MG	pard6gb
ENSDARG00000036102~~ctdsp2	1.69286e-263	1.11739	0.555	0.084	5.50518e-259	MG	ctdsp2	1.73667e-230	0.921537	0.547	0.102	5.64766e-226	MG	ctdsp2
ENSDARG00000036147~~ano5b	0	1.94273	0.961	0.182	0	MG	ano5b	0	1.48524	0.821	0.173	0	MG	ano5b
ENSDARG00000036252~~rras2	4.18236e-191	0.91844	0.304	0.03	1.3601e-186	MG	rras2	1.9474e-138	0.732763	0.254	0.035	6.33294e-134	MG	rras2
ENSDARG00000036427~~slc3a2a	6.72836e-262	1.02182	0.283	0.008	2.18806e-257	MG	slc3a2a	4.5298e-228	0.785748	0.217	0.002	1.47309e-223	MG	slc3a2a
ENSDARG00000036558~~col18a1a	0	2.22092	0.998	0.296	0	MG	col18a1a	0	1.77281	0.996	0.365	0	MG	col18a1a
ENSDARG00000036588~~mhc1zba	0	1.33723	0.539	0.056	0	MG	mhc1zba	0	1.21892	0.535	0.058	0	MG	mhc1zba
ENSDARG00000036774~~rgs12b	0	1.77336	0.94	0.197	0	MG	rgs12b	0	1.64152	0.925	0.205	0	MG	rgs12b
ENSDARG00000036791~~dnmt3bb.1	1.42457e-194	0.960104	0.351	0.044	4.63269e-190	MG	dnmt3bb.1	4.26888e-110	0.645151	0.288	0.059	1.38824e-105	MG	dnmt3bb.1
ENSDARG00000036820~~mgll	3.79107e-94	0.585142	0.17	0.02	1.23286e-89	MG	mgll	8.72983e-117	0.574095	0.183	0.018	2.83894e-112	MG	mgll
ENSDARG00000036846~~anks4b	1.05294e-131	0.671186	0.185	0.013	3.42416e-127	MG	anks4b	9.04722e-217	0.74491	0.212	0.003	2.94216e-212	MG	anks4b
ENSDARG00000036965~~rnf24	5.57701e-228	1.03256	0.809	0.242	1.81364e-223	MG	rnf24	2.7293e-264	1.03852	0.8	0.208	8.87568e-260	MG	rnf24
ENSDARG00000037018~~gab1	0	1.26846	0.888	0.273	0	MG	gab1	4.44442e-306	1.16274	0.844	0.233	1.44533e-301	MG	gab1
ENSDARG00000037363~~dennd2b	0	1.38434	0.791	0.155	0	MG	dennd2b	0	1.19106	0.744	0.155	0	MG	dennd2b
ENSDARG00000037429~~tll1	1.04759e-74	0.592629	0.217	0.047	3.40675e-70	MG	tll1	4.26693e-148	0.650559	0.218	0.018	1.38761e-143	MG	tll1
ENSDARG00000037476~~sorbs3	0	2.46273	0.971	0.114	0	MG	sorbs3	0	2.36975	0.985	0.097	0	MG	sorbs3
ENSDARG00000037555~~atoh8	1.96767e-155	0.69938	0.19	0.009	6.39887e-151	MG	atoh8	4.76723e-147	0.567117	0.159	0.005	1.5503e-142	MG	atoh8
ENSDARG00000037677~~fgf24	0	2.03415	0.68	0.112	0	MG	fgf24	0	2.05169	0.732	0.136	0	MG	fgf24
ENSDARG00000037706~~gss	7.51021e-206	0.98913	0.427	0.064	2.44232e-201	MG	gss	1.32902e-161	0.746173	0.346	0.055	4.32198e-157	MG	gss
ENSDARG00000037815~~b4galt5	2.16308e-152	0.869135	0.343	0.057	7.03433e-148	MG	b4galt5	1.85133e-152	0.766409	0.329	0.055	6.02054e-148	MG	b4galt5
ENSDARG00000037879~~lfng	0	1.60628	0.919	0.211	0	MG	lfng	0	1.42922	0.953	0.246	0	MG	lfng
ENSDARG00000038166~~hyal6	0	3.6941	0.998	0.095	0	MG	hyal6	0	3.5287	0.992	0.082	0	MG	hyal6
ENSDARG00000038424~~c4b	0	1.4411	0.392	0.003	0	MG	c4b	0	1.43175	0.312	0.004	0	MG	c4b
ENSDARG00000038938~~itprid2	0	1.69048	0.827	0.104	0	MG	itprid2	0	1.44407	0.739	0.09	0	MG	itprid2
ENSDARG00000038974~~FO904844.1	2.66582e-64	0.547014	0.217	0.052	8.66925e-60	MG	FO904844.1	2.68612e-109	0.620096	0.257	0.046	8.73525e-105	MG	FO904844.1
ENSDARG00000039335~~st6gal2a	9.92775e-119	0.701285	0.9	0.492	3.2285e-114	MG	st6gal2a	4.62557e-156	0.766622	0.925	0.439	1.50423e-151	MG	st6gal2a
ENSDARG00000039373~~epha3	0	1.28463	0.953	0.32	0	MG	epha3	2.47031e-257	1.05189	0.944	0.35	8.03345e-253	MG	epha3
ENSDARG00000039452~~hk1	1.82135e-67	0.607184	0.311	0.099	5.92302e-63	MG	hk1	5.1802e-89	0.579736	0.345	0.099	1.6846e-84	MG	hk1
ENSDARG00000039459~~qsox1	0	2.16231	0.82	0.083	0	MG	qsox1	0	1.48565	0.664	0.056	0	MG	qsox1
ENSDARG00000039497~~ccdc85a	0	1.18076	0.826	0.191	0	MG	ccdc85a	0	1.39102	0.815	0.16	0	MG	ccdc85a
ENSDARG00000039534~~rrh	4.92652e-211	0.948163	0.283	0.018	1.6021e-206	MG	rrh	6.51043e-177	0.731955	0.223	0.013	2.11719e-172	MG	rrh
ENSDARG00000039563~~loxl3b	0	1.44503	0.716	0.114	0	MG	loxl3b	9.66021e-169	0.837937	0.577	0.157	3.1415e-164	MG	loxl3b
ENSDARG00000039576~~fstl1b	1.38694e-202	0.9936	0.575	0.133	4.51033e-198	MG	fstl1b	7.04436e-271	1.0474	0.644	0.128	2.29083e-266	MG	fstl1b
ENSDARG00000039626~~nrgna	6.56838e-161	0.772979	0.239	0.019	2.13604e-156	MG	nrgna	1.25858e-241	1.01004	0.4	0.047	4.09292e-237	MG	nrgna
ENSDARG00000039914~~gapdhs	8.89976e-196	0.979808	0.455	0.078	2.8942e-191	MG	gapdhs	4.39944e-199	1.04555	0.72	0.231	1.4307e-194	MG	gapdhs
ENSDARG00000039966~~prom1a	5.68282e-226	0.851443	0.998	0.749	1.84805e-221	MG	prom1a	0	1.38453	0.993	0.599	0	MG	prom1a
ENSDARG00000039980~~ppt1	7.14768e-69	0.557137	0.234	0.057	2.32443e-64	MG	ppt1	6.54062e-137	0.732704	0.345	0.068	2.12701e-132	MG	ppt1
ENSDARG00000040009~~palld	0	1.26944	0.568	0.072	0	MG	palld	2.09335e-226	0.949986	0.405	0.053	6.80757e-222	MG	palld
ENSDARG00000040087~~epb41l4a	1.31217e-108	0.746661	0.422	0.122	4.26718e-104	MG	epb41l4a	1.01506e-105	0.653305	0.362	0.095	3.30096e-101	MG	epb41l4a
ENSDARG00000040255~~ephx2	1.96294e-201	0.795418	0.214	0.005	6.38347e-197	MG	ephx2	6.69198e-166	0.646411	0.176	0.005	2.17623e-161	MG	ephx2
ENSDARG00000040295~~apoeb	0	5.13668	0.857	0.056	0	MG	apoeb	0	4.11757	0.966	0.137	0	MG	apoeb
ENSDARG00000040303~~nbn	3.54019e-55	0.564702	0.355	0.142	1.15127e-50	MG	nbn	0	1.63567	0.665	0.138	0	MG	nbn
ENSDARG00000040466~~vil1	0	1.96734	0.678	0.013	0	MG	vil1	0	1.8162	0.664	0.01	0	MG	vil1
ENSDARG00000040469~~enpp6	0	1.24776	0.511	0.058	0	MG	enpp6	1.1933e-277	1.06069	0.459	0.054	3.88063e-273	MG	enpp6
ENSDARG00000040503~~sb:cb81	0	1.67899	0.653	0.04	0	MG	sb:cb81	5.26147e-252	1.03089	0.41	0.046	1.71103e-247	MG	sb:cb81
ENSDARG00000040674~~ctdsp1	2.09145e-212	1.05128	0.442	0.072	6.80141e-208	MG	ctdsp1	7.58452e-190	0.917892	0.433	0.081	2.46648e-185	MG	ctdsp1
ENSDARG00000040717~~macc1	0	1.94574	0.888	0.098	0	MG	macc1	0	2.00364	0.926	0.107	0	MG	macc1
ENSDARG00000040764~~id1	0	1.4884	0.925	0.205	0	MG	id1	0	1.83869	0.959	0.227	0	MG	id1
ENSDARG00000040930~~deptor	1.20537e-94	0.614705	0.224	0.038	3.91985e-90	MG	deptor	6.57287e-106	0.628645	0.245	0.044	2.1375e-101	MG	deptor
ENSDARG00000041078~~chka	1.02254e-86	0.6311	0.532	0.183	3.32528e-82	MG	chka	5.08096e-210	0.872995	0.521	0.101	1.65233e-205	MG	chka
ENSDARG00000041304~~trak1a	5.02997e-191	0.99756	0.536	0.128	1.63575e-186	MG	trak1a	1.93128e-206	0.973542	0.49	0.098	6.28051e-202	MG	trak1a
ENSDARG00000041483~~paqr6	2.50719e-246	1.07489	0.383	0.037	8.15339e-242	MG	paqr6	6.75884e-164	0.782251	0.337	0.052	2.19797e-159	MG	paqr6
ENSDARG00000041505~~itm2bb	1.68674e-137	0.571216	0.14	0.002	5.48528e-133	MG	itm2bb	7.16263e-198	0.829035	0.304	0.03	2.32929e-193	MG	itm2bb
ENSDARG00000041607~~eif4ebp3l	2.49297e-278	1.18263	0.42	0.039	8.10712e-274	MG	eif4ebp3l	2.76669e-99	0.646857	0.243	0.047	8.99728e-95	MG	eif4ebp3l
ENSDARG00000041623~~mt2	0	1.84932	0.537	0.033	0	MG	mt2	0	2.07441	0.709	0.043	0	MG	mt2
ENSDARG00000041703~~rrbp1b	0	1.32609	0.477	0.032	0	MG	rrbp1b	0	1.20919	0.487	0.037	0	MG	rrbp1b
ENSDARG00000041729~~sntb1	0	2.02178	0.867	0.113	0	MG	sntb1	0	1.9232	0.856	0.089	0	MG	sntb1
ENSDARG00000041799~~cx43	0	1.92288	0.556	0.001	0	MG	cx43	0	2.20936	0.744	0.001	0	MG	cx43
ENSDARG00000041982~~adamts6	0	1.33943	0.458	0.015	0	MG	adamts6	0	1.58877	0.551	0.016	0	MG	adamts6
ENSDARG00000042126~~elmo3	2.13441e-147	0.876604	0.396	0.084	6.94109e-143	MG	elmo3	2.92059e-111	0.643721	0.308	0.066	9.49775e-107	MG	elmo3
ENSDARG00000042141~~myo6b	1.153e-255	1.13097	0.999	0.509	3.74957e-251	MG	myo6b	2.71892e-220	0.94879	0.989	0.492	8.84194e-216	MG	myo6b
ENSDARG00000042172~~c7a	0	2.55824	0.706	0.055	0	MG	c7a	0	2.05835	0.693	0.059	0	MG	c7a
ENSDARG00000042249~~FRMD4A	4.81983e-152	0.832547	0.715	0.247	1.56741e-147	MG	FRMD4A	8.33577e-195	0.894756	0.721	0.212	2.71079e-190	MG	FRMD4A
ENSDARG00000042548~~tpd52l1	3.57904e-138	0.697156	0.222	0.021	1.1639e-133	MG	tpd52l1	1.11587e-103	0.530974	0.221	0.034	3.62882e-99	MG	tpd52l1
ENSDARG00000042677~~cadm1b	0	2.48886	0.994	0.11	0	MG	cadm1b	0	2.29128	0.98	0.127	0	MG	cadm1b
ENSDARG00000042690~~s1pr1	0	1.43771	0.676	0.077	0	MG	s1pr1	0	1.38985	0.751	0.107	0	MG	s1pr1
ENSDARG00000042807~~slc16a4	3.03023e-289	1.05396	0.323	0.011	9.8543e-285	MG	slc16a4	6.33878e-150	0.664752	0.207	0.015	2.06137e-145	MG	slc16a4
ENSDARG00000042837~~atp1b3b	4.84327e-176	0.955291	0.741	0.262	1.57503e-171	MG	atp1b3b	6.29797e-277	1.08867	0.736	0.181	2.0481e-272	MG	atp1b3b
ENSDARG00000043130~~notch2	3.5886e-148	0.82792	0.319	0.05	1.16701e-143	MG	notch2	7.03402e-132	0.709363	0.288	0.049	2.28746e-127	MG	notch2
ENSDARG00000043226~~nfixa	2.0346e-210	0.840568	0.983	0.578	6.61651e-206	MG	nfixa	7.49718e-75	0.505454	0.926	0.481	2.43808e-70	MG	nfixa
ENSDARG00000043394~~si:dkey-71h2.2	1.40303e-304	1.21971	0.393	0.025	4.56264e-300	MG	si:dkey-71h2.2	1.01605e-165	0.828989	0.314	0.044	3.30421e-161	MG	si:dkey-71h2.2
ENSDARG00000043395~~crip3	4.60776e-229	1.0409	0.36	0.036	1.49844e-224	MG	crip3	3.71423e-223	0.916243	0.308	0.023	1.20787e-218	MG	crip3
ENSDARG00000043446~~efhd1	0	1.23715	0.467	0.036	0	MG	efhd1	0	1.37905	0.603	0.041	0	MG	efhd1
ENSDARG00000043475~~ENSDARG00000043475	0	1.97011	0.909	0.108	0	MG	ENSDARG00000043475	0	1.96462	0.913	0.099	0	MG	ENSDARG00000043475
ENSDARG00000043511~~prdx6	1.49813e-285	1.17636	0.638	0.108	4.87193e-281	MG	prdx6	6.66177e-197	0.84324	0.398	0.06	2.16641e-192	MG	prdx6
ENSDARG00000043710~~parvaa	9.92528e-79	0.679751	0.34	0.11	3.2277e-74	MG	parvaa	1.03088e-89	0.637057	0.324	0.09	3.35243e-85	MG	parvaa
ENSDARG00000043799~~KLHL29	1.44195e-174	0.91977	0.362	0.055	4.68922e-170	MG	KLHL29	6.94512e-125	0.690757	0.365	0.083	2.25855e-120	MG	KLHL29
ENSDARG00000044015~~gfra2b	1.05522e-251	1.06866	0.351	0.025	3.43158e-247	MG	gfra2b	3.22109e-287	1.05935	0.355	0.022	1.0475e-282	MG	gfra2b
ENSDARG00000044142~~acss1	4.0737e-130	0.538848	0.131	0.002	1.32477e-125	MG	acss1	1.22008e-180	0.678213	0.201	0.007	3.96769e-176	MG	acss1
ENSDARG00000044167~~padi2	2.18424e-178	0.805677	0.242	0.016	7.10314e-174	MG	padi2	1.04157e-138	0.670216	0.215	0.02	3.3872e-134	MG	padi2
ENSDARG00000044281~~erbin	1.35795e-204	0.932527	0.983	0.419	4.41607e-200	MG	erbin	3.0168e-176	0.809078	0.961	0.469	9.81063e-172	MG	erbin
ENSDARG00000044319~~fstl4	4.4379e-85	0.560569	0.269	0.06	1.44321e-80	MG	fstl4	1.40995e-172	0.686419	0.533	0.124	4.58514e-168	MG	fstl4
ENSDARG00000044345~~cyfip1	9.73563e-131	0.807415	0.595	0.193	3.16603e-126	MG	cyfip1	7.08019e-175	0.776366	0.576	0.138	2.30248e-170	MG	cyfip1
ENSDARG00000044501~~viml	0	1.5125	0.539	0.01	0	MG	viml	0	1.58393	0.588	0.01	0	MG	viml
ENSDARG00000044601~~rtn4a	1.50282e-292	1.17095	0.987	0.555	4.88718e-288	MG	rtn4a	1.10235e-219	0.952847	0.993	0.557	3.58484e-215	MG	rtn4a
ENSDARG00000045006~~ptprga	1.0271e-90	0.64125	0.849	0.478	3.34014e-86	MG	ptprga	4.52538e-125	0.64841	0.921	0.478	1.47165e-120	MG	ptprga
ENSDARG00000045064~~ablim1b	0	2.08053	0.997	0.3	0	MG	ablim1b	0	2.03813	0.99	0.304	0	MG	ablim1b
ENSDARG00000045199~~CAPN1	6.04557e-91	0.640867	0.208	0.034	1.96602e-86	MG	CAPN1	9.36909e-89	0.563353	0.238	0.049	3.04683e-84	MG	CAPN1
ENSDARG00000045200~~dusp19b	0	1.31329	0.817	0.188	0	MG	dusp19b	0	1.46554	0.846	0.16	0	MG	dusp19b
ENSDARG00000045219~~dkk1b	2.58279e-250	1.6591	0.251	0.004	8.39923e-246	MG	dkk1b	5.94624e-224	1.03825	0.214	0.002	1.93372e-219	MG	dkk1b
ENSDARG00000045414~~elovl2	9.25796e-166	0.956421	0.342	0.054	3.01069e-161	MG	elovl2	6.15385e-88	0.632975	0.254	0.058	2.00123e-83	MG	elovl2
ENSDARG00000045486~~pawr	2.79306e-293	1.16273	0.993	0.297	9.08304e-289	MG	pawr	1.86258e-227	0.841379	0.979	0.357	6.05712e-223	MG	pawr
ENSDARG00000045506~~gramd4b	6.5911e-184	0.928798	0.746	0.248	2.14343e-179	MG	gramd4b	4.66176e-184	0.843664	0.74	0.227	1.516e-179	MG	gramd4b
ENSDARG00000045556~~OTUD7A	9.41476e-85	0.604583	0.233	0.046	3.06168e-80	MG	OTUD7A	2.22057e-118	0.612513	0.235	0.034	7.22129e-114	MG	OTUD7A
ENSDARG00000045658~~msrb3	4.68339e-149	0.831862	0.324	0.049	1.52304e-144	MG	msrb3	1.88174e-148	0.718661	0.259	0.031	6.11942e-144	MG	msrb3
ENSDARG00000045749~~ppfibp1a	7.99816e-120	0.587639	0.138	0.005	2.601e-115	MG	ppfibp1a	1.0042e-223	0.795137	0.223	0.004	3.26567e-219	MG	ppfibp1a
ENSDARG00000045898~~si:ch211-152c2.3	0	1.69486	0.457	0	0	MG	si:ch211-152c2.3	0	2.69772	0.687	0.002	0	MG	si:ch211-152c2.3
ENSDARG00000045930~~rbpms2a	0	1.46606	0.899	0.126	0	MG	rbpms2a	0	0.910715	0.906	0.175	0	MG	rbpms2a
ENSDARG00000045936~~pax6b	1.33145e-226	0.735968	0.987	0.352	4.32989e-222	MG	pax6b	4.21482e-179	0.530941	0.967	0.401	1.37066e-174	MG	pax6b
ENSDARG00000045979~~zgc:153704	0	1.66111	0.381	0	0	MG	zgc:153704	0	1.63141	0.392	0	0	MG	zgc:153704
ENSDARG00000046053~~slc27a6	9.03184e-152	0.800921	0.249	0.025	2.93715e-147	MG	slc27a6	0	1.27081	0.375	0.008	0	MG	slc27a6
ENSDARG00000046054~~CT027815.1	7.45053e-198	0.969623	0.367	0.048	2.42291e-193	MG	CT027815.1	0	1.31564	0.604	0.058	0	MG	CT027815.1
ENSDARG00000046107~~caskin1	9.7051e-295	1.18398	0.622	0.093	3.1561e-290	MG	caskin1	0	1.18289	0.735	0.12	0	MG	caskin1
ENSDARG00000051748~~ccnd2a	3.72579e-238	1.52766	0.665	0.168	1.21163e-233	MG	ccnd2a	8.32992e-124	0.80283	0.665	0.244	2.70889e-119	MG	ccnd2a
ENSDARG00000051876~~ush1c	0	2.00757	0.838	0.048	0	MG	ush1c	0	1.70304	0.762	0.064	0	MG	ush1c
ENSDARG00000051975~~cd99	4.45789e-258	1.21952	0.49	0.073	1.44971e-253	MG	cd99	0	1.46853	0.663	0.109	0	MG	cd99
ENSDARG00000052045~~ggt5a	8.01314e-195	0.779762	0.205	0.004	2.60587e-190	MG	ggt5a	1.00854e-118	0.506962	0.129	0.004	3.27976e-114	MG	ggt5a
ENSDARG00000052061~~col4a6	0	2.36041	0.954	0.067	0	MG	col4a6	0	2.0146	0.908	0.063	0	MG	col4a6
ENSDARG00000052063~~col4a5	0	1.57024	0.653	0.041	0	MG	col4a5	0	1.28322	0.502	0.028	0	MG	col4a5
ENSDARG00000052129~~boka	0	1.92416	0.794	0.041	0	MG	boka	0	2.53942	0.911	0.036	0	MG	boka
ENSDARG00000052131~~gli3	3.05792e-148	0.83429	0.673	0.212	9.94437e-144	MG	gli3	5.56042e-114	0.628807	0.728	0.259	1.80825e-109	MG	gli3
ENSDARG00000052139~~notch3	2.06095e-291	1.16866	0.81	0.195	6.7022e-287	MG	notch3	2.03799e-278	1.03771	0.856	0.225	6.62755e-274	MG	notch3
ENSDARG00000052148~~ptgs1	9.86297e-304	1.0209	0.292	0.002	3.20744e-299	MG	ptgs1	1.8547e-235	0.768376	0.219	0.001	6.03149e-231	MG	ptgs1
ENSDARG00000052242~~aff2	0	1.73012	0.992	0.287	0	MG	aff2	0	1.63066	0.971	0.271	0	MG	aff2
ENSDARG00000052388~~pcgf5b	1.8493e-110	0.669493	0.2	0.023	6.01394e-106	MG	pcgf5b	6.24205e-119	0.599397	0.189	0.019	2.02992e-114	MG	pcgf5b
ENSDARG00000052702~~capn1a	7.19984e-260	1.12016	0.509	0.075	2.34139e-255	MG	capn1a	0	1.14823	0.565	0.064	0	MG	capn1a
ENSDARG00000052903~~rtkn2b	1.8474e-129	0.784064	0.297	0.051	6.00775e-125	MG	rtkn2b	2.07498e-151	0.748117	0.279	0.037	6.74784e-147	MG	rtkn2b
ENSDARG00000052978~~mbnl1	2.13213e-55	0.544401	0.289	0.101	6.9337e-51	MG	mbnl1	1.30592e-72	0.53746	0.338	0.112	4.24687e-68	MG	mbnl1
ENSDARG00000053129~~carhsp1	5.38334e-194	0.933182	0.319	0.033	1.75066e-189	MG	carhsp1	1.02693e-144	0.724524	0.306	0.049	3.33958e-140	MG	carhsp1
ENSDARG00000053136~~b2m	9.63558e-96	0.708274	0.333	0.083	3.13349e-91	MG	b2m	1.84933e-95	0.614654	0.467	0.155	6.01402e-91	MG	b2m
ENSDARG00000053262~~atp1b4	0	1.80939	0.394	0.001	0	MG	atp1b4	0	2.54853	0.615	0.002	0	MG	atp1b4
ENSDARG00000053272~~RAP1GAP	1.04016e-299	1.25381	0.589	0.096	3.38259e-295	MG	RAP1GAP	1.16906e-231	1.02168	0.558	0.112	3.80177e-227	MG	RAP1GAP
ENSDARG00000053326~~gna11b	2.49283e-172	0.858573	0.814	0.324	8.10668e-168	MG	gna11b	5.42699e-190	0.919736	0.791	0.281	1.76486e-185	MG	gna11b
ENSDARG00000053487~~osbp2	6.23845e-81	0.520318	0.144	0.016	2.02874e-76	MG	osbp2	4.63249e-208	0.85046	0.271	0.018	1.50649e-203	MG	osbp2
ENSDARG00000053493~~aldh1a2	0	1.23922	0.368	0.006	0	MG	aldh1a2	0	1.08685	0.326	0.004	0	MG	aldh1a2
ENSDARG00000053535~~lmo7b	0	2.18384	0.837	0.011	0	MG	lmo7b	0	1.9225	0.746	0.017	0	MG	lmo7b
ENSDARG00000053724~~adcyap1r1a	0	3.56142	0.997	0.069	0	MG	adcyap1r1a	0	2.86508	0.979	0.055	0	MG	adcyap1r1a
ENSDARG00000053835~~plekhh1	0	1.4998	0.769	0.14	0	MG	plekhh1	0	1.35405	0.746	0.123	0	MG	plekhh1
ENSDARG00000053859~~ism2b	6.56797e-263	0.999952	0.287	0.008	2.1359e-258	MG	ism2b	6.60094e-219	0.831331	0.249	0.01	2.14663e-214	MG	ism2b
ENSDARG00000054060~~pof1b	0	1.9326	0.816	0.031	0	MG	pof1b	0	1.74152	0.757	0.033	0	MG	pof1b
ENSDARG00000054451~~loxl1	0	1.40724	0.514	0.016	0	MG	loxl1	0	1.27735	0.493	0.021	0	MG	loxl1
ENSDARG00000054619~~fras1	0	1.21642	0.412	0.015	0	MG	fras1	5.0875e-138	0.662926	0.234	0.027	1.65445e-133	MG	fras1
ENSDARG00000054754~~hs6st1a	0	1.27712	0.996	0.477	0	MG	hs6st1a	1.05117e-240	0.81967	0.991	0.584	3.41841e-236	MG	hs6st1a
ENSDARG00000054771~~ghra	0	2.57801	0.968	0.086	0	MG	ghra	0	2.15638	0.941	0.095	0	MG	ghra
ENSDARG00000054823~~id3	7.62378e-134	0.81303	0.337	0.064	2.47925e-129	MG	id3	3.32483e-135	0.720954	0.306	0.054	1.08123e-130	MG	id3
ENSDARG00000054848~~pdk4	3.08243e-162	0.883694	0.314	0.043	1.00241e-157	MG	pdk4	5.93232e-264	1.01092	0.378	0.033	1.92919e-259	MG	pdk4
ENSDARG00000054864~~aplp2	0	1.93039	0.998	0.572	0	MG	aplp2	0	2.20233	0.993	0.475	0	MG	aplp2
ENSDARG00000054978~~kifc3	0	1.46859	0.835	0.143	0	MG	kifc3	0	1.43951	0.863	0.136	0	MG	kifc3
ENSDARG00000055100~~cxcl12b	0	1.6634	0.497	0.014	0	MG	cxcl12b	8.22396e-245	0.906445	0.25	0.006	2.67443e-240	MG	cxcl12b
ENSDARG00000055120~~ctsba	1.98482e-74	0.651058	0.305	0.09	6.45465e-70	MG	ctsba	1.06309e-95	0.652164	0.431	0.141	3.45717e-91	MG	ctsba
ENSDARG00000055225~~dock8	0	2.35688	0.967	0.079	0	MG	dock8	0	2.28765	0.956	0.088	0	MG	dock8
ENSDARG00000055255~~pitpnm3	0	1.35188	0.524	0.032	0	MG	pitpnm3	1.15035e-233	0.925029	0.354	0.033	3.74095e-229	MG	pitpnm3
ENSDARG00000055373~~sema3fb	6.95962e-144	0.761293	0.242	0.025	2.26327e-139	MG	sema3fb	9.77683e-97	0.554572	0.177	0.023	3.17943e-92	MG	sema3fb
ENSDARG00000055381~~bambia	3.80595e-101	0.794429	0.463	0.159	1.23769e-96	MG	bambia	4.8854e-123	0.967199	0.503	0.174	1.58873e-118	MG	bambia
ENSDARG00000055400~~si:dkey-56f14.7	1.0585e-99	0.764825	0.331	0.08	3.44223e-95	MG	si:dkey-56f14.7	7.90561e-290	1.41902	0.541	0.086	2.5709e-285	MG	si:dkey-56f14.7
ENSDARG00000055543~~appb	9.85199e-186	0.941409	0.645	0.17	3.20387e-181	MG	appb	2.12709e-132	0.670148	0.692	0.227	6.91729e-128	MG	appb
ENSDARG00000055607~~cgna	7.43611e-86	0.683541	0.403	0.134	2.41822e-81	MG	cgna	2.54085e-99	0.588073	0.427	0.127	8.26283e-95	MG	cgna
ENSDARG00000055632~~smtnl	5.2009e-151	0.700111	0.194	0.01	1.69133e-146	MG	smtnl	1.67855e-132	0.552972	0.14	0.004	5.45866e-128	MG	smtnl
ENSDARG00000055678~~akap12b	2.40237e-91	0.726875	0.446	0.16	7.81251e-87	MG	akap12b	1.62643e-90	0.617343	0.509	0.189	5.28914e-86	MG	akap12b
ENSDARG00000055722~~bco2a	2.59111e-302	1.10806	0.352	0.014	8.4263e-298	MG	bco2a	2.88757e-277	0.98326	0.339	0.018	9.39039e-273	MG	bco2a
ENSDARG00000055876~~msmo1	5.06374e-140	0.928723	0.294	0.045	1.64673e-135	MG	msmo1	1.54523e-163	0.766192	0.218	0.015	5.02508e-159	MG	msmo1
ENSDARG00000055901~~steap4	0	2.18537	0.456	0.007	0	MG	steap4	0	2.00096	0.298	0.004	0	MG	steap4
ENSDARG00000055945~~asph	6.46152e-138	0.821695	0.429	0.098	2.10129e-133	MG	asph	3.00458e-186	0.826828	0.524	0.116	9.7709e-182	MG	asph
ENSDARG00000056078~~rftn2	3.21447e-294	1.19285	0.59	0.095	1.04534e-289	MG	rftn2	0	1.14852	0.637	0.099	0	MG	rftn2
ENSDARG00000056228~~pld1a	5.28232e-92	0.608718	0.204	0.032	1.71781e-87	MG	pld1a	9.87598e-168	0.768218	0.282	0.032	3.21167e-163	MG	pld1a
ENSDARG00000056245~~zgc:162952	2.34923e-220	0.953042	0.294	0.019	7.63971e-216	MG	zgc:162952	0	1.40235	0.473	0.013	0	MG	zgc:162952
ENSDARG00000056322~~ldb3a	9.2621e-146	0.878633	0.686	0.228	3.01203e-141	MG	ldb3a	4.05871e-153	0.740252	0.537	0.134	1.31989e-148	MG	ldb3a
ENSDARG00000056346~~acap1	5.78013e-195	0.844499	0.259	0.016	1.8797e-190	MG	acap1	1.8603e-189	0.769601	0.255	0.018	6.04971e-185	MG	acap1
ENSDARG00000056481~~vat1	0	1.34041	0.929	0.26	0	MG	vat1	0	1.44042	0.934	0.238	0	MG	vat1
ENSDARG00000056525~~bcar1	1.26101e-92	0.659497	0.356	0.098	4.1008e-88	MG	bcar1	9.12413e-76	0.540776	0.364	0.122	2.96717e-71	MG	bcar1
ENSDARG00000056530~~cpamd8	1.36165e-143	0.723145	0.206	0.015	4.4281e-139	MG	cpamd8	8.57073e-129	0.597012	0.172	0.012	2.7872e-124	MG	cpamd8
ENSDARG00000056680~~stc2a	0	1.73643	0.369	0.012	0	MG	stc2a	0	1.64907	0.358	0.008	0	MG	stc2a
ENSDARG00000056704~~RAMP1	8.10592e-304	1.47695	0.605	0.103	2.63605e-299	MG	RAMP1	0	1.55345	0.693	0.128	0	MG	RAMP1
ENSDARG00000056774~~gpr37l1b	6.43332e-168	0.753279	0.205	0.009	2.09212e-163	MG	gpr37l1b	8.51716e-211	0.838718	0.262	0.014	2.76978e-206	MG	gpr37l1b
ENSDARG00000056783~~raraa	0	1.7524	0.946	0.193	0	MG	raraa	0	2.0066	0.926	0.109	0	MG	raraa
ENSDARG00000056922~~ltbp1	0	2.29323	0.911	0.056	0	MG	ltbp1	0	2.00457	0.846	0.047	0	MG	ltbp1
ENSDARG00000056934~~hepacama	0	1.14751	0.35	0.013	0	MG	hepacama	0	1.45774	0.522	0.013	0	MG	hepacama
ENSDARG00000057016~~cdc14ab	5.85854e-209	0.975417	0.907	0.401	1.9052e-204	MG	cdc14ab	0	1.6965	0.887	0.279	0	MG	cdc14ab
ENSDARG00000057108~~serpine3	0	2.21729	0.553	0.002	0	MG	serpine3	0	1.86905	0.462	0.001	0	MG	serpine3
ENSDARG00000057121~~c7b	4.91046e-245	1.99227	0.364	0.031	1.59688e-240	MG	c7b	2.21476e-171	1.72972	0.383	0.074	7.20239e-167	MG	c7b
ENSDARG00000057148~~mocos	6.46462e-266	1.02818	0.324	0.016	2.10229e-261	MG	mocos	2.25923e-206	0.842653	0.284	0.022	7.34701e-202	MG	mocos
ENSDARG00000057166~~lrmda	7.4933e-214	1.16495	0.577	0.138	2.43682e-209	MG	lrmda	6.55029e-163	0.845546	0.509	0.13	2.13015e-158	MG	lrmda
ENSDARG00000057286~~swap70b	1.63984e-160	0.827943	0.303	0.04	5.33275e-156	MG	swap70b	1.43198e-140	0.746321	0.307	0.052	4.65681e-136	MG	swap70b
ENSDARG00000057452~~ston2	3.16562e-166	0.89242	0.601	0.163	1.02946e-161	MG	ston2	2.10312e-268	0.992241	0.613	0.11	6.83935e-264	MG	ston2
ENSDARG00000057671~~epas1b	0	1.75118	0.925	0.155	0	MG	epas1b	0	2.33706	0.91	0.122	0	MG	epas1b
ENSDARG00000057737~~rxraa	5.58113e-231	1.20221	0.881	0.389	1.81498e-226	MG	rxraa	0	1.51453	0.881	0.247	0	MG	rxraa
ENSDARG00000057767~~nudt4a	7.19094e-179	0.909759	0.357	0.052	2.33849e-174	MG	nudt4a	1.61256e-165	0.781566	0.326	0.048	5.24403e-161	MG	nudt4a
ENSDARG00000057927~~rps6ka3b	1.21016e-98	0.720527	0.718	0.325	3.93543e-94	MG	rps6ka3b	5.73752e-119	0.658994	0.675	0.247	1.86584e-114	MG	rps6ka3b
ENSDARG00000057992~~fstb	0	1.56794	0.534	0.019	0	MG	fstb	4.28948e-251	1.18051	0.459	0.067	1.39494e-246	MG	fstb
ENSDARG00000058038~~eml3	2.0925e-91	0.682449	0.3	0.073	6.80481e-87	MG	eml3	5.99635e-180	0.880788	0.363	0.056	1.95001e-175	MG	eml3
ENSDARG00000058115~~fgfr2	0	1.67559	0.733	0.064	0	MG	fgfr2	0	1.59592	0.754	0.07	0	MG	fgfr2
ENSDARG00000058348~~scinlb	1.74296e-182	0.782301	0.217	0.009	5.66809e-178	MG	scinlb	3.38185e-181	0.703545	0.215	0.01	1.09978e-176	MG	scinlb
ENSDARG00000058543~~lama5	0	2.25809	0.941	0.052	0	MG	lama5	0	2.22496	0.912	0.036	0	MG	lama5
ENSDARG00000058693~~cast	1.50146e-180	0.849268	0.296	0.03	4.88275e-176	MG	cast	2.87328e-226	0.910883	0.361	0.039	9.3439e-222	MG	cast
ENSDARG00000058699~~tmeff2b	0	2.06392	0.738	0.045	0	MG	tmeff2b	0	1.28318	0.552	0.047	0	MG	tmeff2b
ENSDARG00000058730~~rdh10a	0	2.32785	0.667	0.01	0	MG	rdh10a	0	1.99235	0.532	0.056	0	MG	rdh10a
ENSDARG00000058966~~zgc:112332	0	2.37734	0.827	0.024	0	MG	zgc:112332	0	3.01622	0.971	0.044	0	MG	zgc:112332
ENSDARG00000059035~~porb	2.31565e-103	0.754361	0.305	0.07	7.5305e-99	MG	porb	9.76391e-197	0.886426	0.396	0.06	3.17522e-192	MG	porb
ENSDARG00000059231~~hephl1a	2.90607e-95	0.628443	0.228	0.04	9.45054e-91	MG	hephl1a	7.25751e-106	0.65326	0.289	0.063	2.36014e-101	MG	hephl1a
ENSDARG00000059347~~calml4b	0	2.66201	0.972	0.073	0	MG	calml4b	0	2.80475	0.977	0.06	0	MG	calml4b
ENSDARG00000059391~~gyg1b	0	1.25157	0.386	0.001	0	MG	gyg1b	0	1.33796	0.462	0.006	0	MG	gyg1b
ENSDARG00000059460~~sbf2	1.02532e-205	0.954515	0.957	0.457	3.33432e-201	MG	sbf2	1.99778e-128	0.721323	0.908	0.416	6.49679e-124	MG	sbf2
ENSDARG00000059483~~tead1b	3.18573e-78	0.557087	0.938	0.548	1.036e-73	MG	tead1b	1.48471e-178	0.843483	0.888	0.338	4.82828e-174	MG	tead1b
ENSDARG00000059610~~gpr146	1.25941e-283	1.19887	0.533	0.074	4.09561e-279	MG	gpr146	7.11179e-284	1.06522	0.473	0.055	2.31275e-279	MG	gpr146
ENSDARG00000059680~~fscn1a	1.67513e-139	0.808696	0.372	0.075	5.44751e-135	MG	fscn1a	6.12429e-202	0.899098	0.492	0.098	1.99162e-197	MG	fscn1a
ENSDARG00000059719~~fam169aa	6.8695e-145	0.813633	0.352	0.061	2.23396e-140	MG	fam169aa	1.90728e-201	0.829542	0.403	0.058	6.20248e-197	MG	fam169aa
ENSDARG00000059746~~plod1a	6.40463e-91	0.527447	0.146	0.014	2.08278e-86	MG	plod1a	7.50015e-111	0.576185	0.189	0.022	2.43905e-106	MG	plod1a
ENSDARG00000059751~~abtb2a	3.41667e-148	0.775656	0.262	0.03	1.1111e-143	MG	abtb2a	4.67475e-210	0.86064	0.294	0.023	1.52023e-205	MG	abtb2a
ENSDARG00000059897~~ntrk2a	1.71971e-57	0.619041	0.401	0.173	5.5925e-53	MG	ntrk2a	2.74463e-55	0.529237	0.508	0.241	8.92554e-51	MG	ntrk2a
ENSDARG00000059933~~plpp3	5.07694e-281	1.20247	0.723	0.165	1.65102e-276	MG	plpp3	2.79829e-183	0.893035	0.643	0.182	9.10003e-179	MG	plpp3
ENSDARG00000059965~~camsap2b	3.92571e-44	0.508098	0.198	0.063	1.27664e-39	MG	camsap2b	1.2607e-90	0.604528	0.251	0.056	4.09979e-86	MG	camsap2b
ENSDARG00000059972~~raly	0	2.06317	0.782	0.04	0	MG	raly	0	1.72932	0.71	0.056	0	MG	raly
ENSDARG00000060006~~nedd4l	0	1.15642	0.989	0.565	0	MG	nedd4l	1.5416e-297	1.09269	0.98	0.454	5.0133e-293	MG	nedd4l
ENSDARG00000060070~~adcy7	0	1.68436	0.828	0.126	0	MG	adcy7	0	2.07815	0.95	0.157	0	MG	adcy7
ENSDARG00000060072~~abi3a	0	1.46488	0.499	0.006	0	MG	abi3a	0	1.42618	0.524	0.006	0	MG	abi3a
ENSDARG00000060102~~kank1a	1.76102e-216	1.08199	0.636	0.168	5.72683e-212	MG	kank1a	0	1.29498	0.762	0.142	0	MG	kank1a
ENSDARG00000060103~~cpeb3	3.70237e-82	0.571016	0.212	0.039	1.20401e-77	MG	cpeb3	1.72065e-106	0.565319	0.226	0.036	5.59554e-102	MG	cpeb3
ENSDARG00000060127~~adamts3	1.11548e-227	1.03325	0.555	0.113	3.62754e-223	MG	adamts3	4.84812e-230	1.04995	0.533	0.105	1.57661e-225	MG	adamts3
ENSDARG00000060309~~srgap3	1.15797e-192	0.775595	0.988	0.487	3.76573e-188	MG	srgap3	6.80539e-133	0.590443	0.986	0.587	2.21311e-128	MG	srgap3
ENSDARG00000060415~~arhgef28a	0	2.60641	0.958	0.038	0	MG	arhgef28a	0	2.16796	0.897	0.047	0	MG	arhgef28a
ENSDARG00000060626~~dgkaa	1.43817e-155	0.761245	0.234	0.019	4.67693e-151	MG	dgkaa	1.51427e-192	0.811718	0.273	0.022	4.92439e-188	MG	dgkaa
ENSDARG00000060688~~trim69	4.87089e-89	0.571635	0.19	0.028	1.58401e-84	MG	trim69	1.36323e-122	0.596278	0.203	0.022	4.43323e-118	MG	trim69
ENSDARG00000060796~~slc20a2	9.94418e-80	0.548988	0.869	0.522	3.23385e-75	MG	slc20a2	2.70002e-81	0.519246	0.791	0.367	8.78048e-77	MG	slc20a2
ENSDARG00000060841~~pik3c2a	0	1.57068	0.846	0.134	0	MG	pik3c2a	0	1.30381	0.747	0.117	0	MG	pik3c2a
ENSDARG00000060862~~atxn1b	4.48967e-68	0.531231	0.216	0.049	1.46004e-63	MG	atxn1b	3.46931e-84	0.526107	0.235	0.05	1.12822e-79	MG	atxn1b
ENSDARG00000060875~~pde1a	7.06033e-223	0.754721	0.523	0.087	2.29602e-218	MG	pde1a	1.90012e-158	0.721465	0.371	0.067	6.17919e-154	MG	pde1a
ENSDARG00000060978~~atp2a3	3.05362e-180	0.795408	0.204	0.007	9.93038e-176	MG	atp2a3	4.55589e-303	1.03534	0.31	0.007	1.48158e-298	MG	atp2a3
ENSDARG00000061039~~atp10a	2.31817e-142	0.851154	0.627	0.226	7.5387e-138	MG	atp10a	3.16641e-109	0.652595	0.59	0.213	1.02972e-104	MG	atp10a
ENSDARG00000061099~~nfasca	0	3.18725	0.999	0.357	0	MG	nfasca	0	3.13862	0.993	0.418	0	MG	nfasca
ENSDARG00000061120~~slc43a2b	0	2.17862	0.871	0.032	0	MG	slc43a2b	0	2.51032	0.916	0.034	0	MG	slc43a2b
ENSDARG00000061231~~tinagl1	2.97197e-243	1.04887	0.34	0.026	9.66484e-239	MG	tinagl1	3.31736e-173	0.881841	0.332	0.049	1.0788e-168	MG	tinagl1
ENSDARG00000061328~~cdon	0	2.63655	0.998	0.217	0	MG	cdon	0	2.28507	0.991	0.22	0	MG	cdon
ENSDARG00000061335~~galnt1	1.54356e-265	0.98026	0.982	0.514	5.01966e-261	MG	galnt1	3.95232e-129	0.660293	0.948	0.467	1.2853e-124	MG	galnt1
ENSDARG00000061371~~cdh18a	0	1.38354	0.685	0.084	0	MG	cdh18a	3.67105e-294	1.11968	0.556	0.084	1.19383e-289	MG	cdh18a
ENSDARG00000061405~~eva1a	0	1.92143	0.725	0.022	0	MG	eva1a	0	1.72461	0.643	0.041	0	MG	eva1a
ENSDARG00000061421~~BRSK2	2.04053e-241	1.1003	0.99	0.55	6.6358e-237	MG	BRSK2	2.93245e-291	1.17397	0.961	0.417	9.53632e-287	MG	BRSK2
ENSDARG00000061445~~adcy6a	0	1.5343	0.919	0.245	0	MG	adcy6a	0	1.35301	0.932	0.242	0	MG	adcy6a
ENSDARG00000061590~~cachd1	8.62207e-240	1.11812	0.637	0.15	2.8039e-235	MG	cachd1	3.80715e-167	0.827656	0.566	0.149	1.23809e-162	MG	cachd1
ENSDARG00000061654~~wwc3	8.27673e-263	1.16955	0.566	0.103	2.69159e-258	MG	wwc3	5.06674e-174	0.870584	0.448	0.093	1.6477e-169	MG	wwc3
ENSDARG00000061687~~atxn1a	3.66939e-187	0.957912	0.828	0.289	1.19328e-182	MG	atxn1a	1.31787e-305	1.09792	0.777	0.175	4.28571e-301	MG	atxn1a
ENSDARG00000061692~~yjefn3	0	2.85992	0.897	0.013	0	MG	yjefn3	0	2.71397	0.842	0.03	0	MG	yjefn3
ENSDARG00000061697~~ca14	0	2.37101	0.97	0.081	0	MG	ca14	0	2.04396	0.867	0.062	0	MG	ca14
ENSDARG00000061725~~mast3a	3.45531e-304	1.32017	0.849	0.273	1.12367e-299	MG	mast3a	0	1.43216	0.857	0.215	0	MG	mast3a
ENSDARG00000061764~~ahnak	0	1.59418	0.663	0.052	0	MG	ahnak	0	1.32329	0.596	0.059	0	MG	ahnak
ENSDARG00000061796~~rasgrp4	0	1.98593	0.769	0.006	0	MG	rasgrp4	0	1.74702	0.678	0.007	0	MG	rasgrp4
ENSDARG00000061836~~nfixb	0	1.43866	0.998	0.423	0	MG	nfixb	0	1.66034	0.993	0.444	0	MG	nfixb
ENSDARG00000061848~~col15a1b	0	3.32843	0.913	0.016	0	MG	col15a1b	0	3.42846	0.947	0.024	0	MG	col15a1b
ENSDARG00000061862~~myo18ab	2.57784e-142	0.845348	0.788	0.304	8.38313e-138	MG	myo18ab	1.12779e-193	0.919143	0.797	0.256	3.66757e-189	MG	myo18ab
ENSDARG00000061896~~slco2a1	0	1.99745	0.766	0.012	0	MG	slco2a1	0	1.66563	0.644	0.01	0	MG	slco2a1
ENSDARG00000061940~~htr4	0	1.8062	0.805	0.09	0	MG	htr4	0	1.29145	0.644	0.107	0	MG	htr4
ENSDARG00000061976~~sema6bb	6.9004e-152	0.85296	0.345	0.061	2.24401e-147	MG	sema6bb	2.79818e-143	0.773949	0.383	0.083	9.09967e-139	MG	sema6bb
ENSDARG00000062023~~fndc3bb	3.56201e-218	1.05708	0.701	0.204	1.15837e-213	MG	fndc3bb	9.16691e-192	0.892647	0.643	0.179	2.98108e-187	MG	fndc3bb
ENSDARG00000062058~~slc12a7b	0	1.50811	0.818	0.141	0	MG	slc12a7b	0	1.36908	0.729	0.136	0	MG	slc12a7b
ENSDARG00000062165~~tub	0	1.34241	0.622	0.069	0	MG	tub	0	1.14175	0.602	0.089	0	MG	tub
ENSDARG00000062190~~pde3b	4.76079e-77	0.568145	0.768	0.394	1.54821e-72	MG	pde3b	4.26144e-63	0.543218	0.753	0.402	1.38582e-58	MG	pde3b
ENSDARG00000062220~~plekha7b	1.38507e-218	1.03446	0.993	0.494	4.50425e-214	MG	plekha7b	2.91178e-226	0.953594	0.979	0.433	9.46912e-222	MG	plekha7b
ENSDARG00000062315~~sik2b	0	1.8526	0.901	0.145	0	MG	sik2b	0	1.68788	0.858	0.147	0	MG	sik2b
ENSDARG00000062370~~bcl2l13	5.35865e-97	0.720273	0.293	0.066	1.74263e-92	MG	bcl2l13	8.14838e-120	0.697837	0.349	0.079	2.64985e-115	MG	bcl2l13
ENSDARG00000062415~~ctnnd2a	0	1.72023	0.96	0.257	0	MG	ctnnd2a	0	1.20077	0.887	0.239	0	MG	ctnnd2a
ENSDARG00000062420~~nfia	1.18925e-298	1.32242	0.989	0.47	3.86743e-294	MG	nfia	2.94379e-234	0.988002	0.984	0.474	9.57322e-230	MG	nfia
ENSDARG00000062460~~SGK3	5.05121e-126	0.827482	0.453	0.127	1.64265e-121	MG	SGK3	3.91565e-163	0.826071	0.461	0.104	1.27337e-158	MG	SGK3
ENSDARG00000062485~~dock11	1.83616e-157	0.881965	0.376	0.067	5.97118e-153	MG	dock11	0	1.22644	0.654	0.111	0	MG	dock11
ENSDARG00000062573~~znrf3	0	1.45447	0.972	0.446	0	MG	znrf3	6.52307e-211	0.947968	0.945	0.389	2.1213e-206	MG	znrf3
ENSDARG00000062579~~kremen1	5.59049e-297	1.45685	0.882	0.304	1.81803e-292	MG	kremen1	8.43725e-173	1.06437	0.684	0.261	2.7438e-168	MG	kremen1
ENSDARG00000062590~~pleca	0	2.57792	0.998	0.311	0	MG	pleca	0	2.32604	0.996	0.401	0	MG	pleca
ENSDARG00000062855~~plekhg7	0	3.39445	0.998	0.141	0	MG	plekhg7	0	3.2319	0.993	0.155	0	MG	plekhg7
ENSDARG00000062909~~furina	0	1.16673	0.993	0.61	0	MG	furina	9.12713e-154	0.841759	0.92	0.452	2.96814e-149	MG	furina
ENSDARG00000063026~~mlc1	0	2.39085	0.935	0.027	0	MG	mlc1	0	2.2689	0.886	0.031	0	MG	mlc1
ENSDARG00000063040~~btbd11b	0	1.63637	0.75	0.087	0	MG	btbd11b	0	1.2145	0.61	0.099	0	MG	btbd11b
ENSDARG00000063068~~syne1b	0	1.6713	0.997	0.655	0	MG	syne1b	0	1.72237	0.994	0.618	0	MG	syne1b
ENSDARG00000063075~~soga1	0	1.61078	0.99	0.365	0	MG	soga1	0	1.5264	0.975	0.335	0	MG	soga1
ENSDARG00000063095~~ctsf	2.55435e-152	0.824522	0.312	0.043	8.30675e-148	MG	ctsf	4.72109e-299	1.11288	0.61	0.1	1.5353e-294	MG	ctsf
ENSDARG00000063230~~bmp7b	0	2.38816	0.914	0.075	0	MG	bmp7b	0	1.89281	0.782	0.08	0	MG	bmp7b
ENSDARG00000063390~~pvrl2l	0	1.7032	0.97	0.271	0	MG	pvrl2l	1.46511e-304	1.16947	0.911	0.276	4.76452e-300	MG	pvrl2l
ENSDARG00000063407~~LO018340.1	0	1.19686	0.402	0.015	0	MG	LO018340.1	1.36626e-255	0.914061	0.296	0.013	4.44308e-251	MG	LO018340.1
ENSDARG00000063416~~ptprk	0	1.92337	0.988	0.226	0	MG	ptprk	0	1.8432	0.987	0.261	0	MG	ptprk
ENSDARG00000063544~~pip4k2ab	4.00102e-113	0.737646	0.602	0.205	1.30113e-108	MG	pip4k2ab	7.00029e-222	0.916901	0.6	0.13	2.27649e-217	MG	pip4k2ab
ENSDARG00000063563~~creb3l2	2.15812e-66	0.565209	0.279	0.08	7.01819e-62	MG	creb3l2	2.96237e-107	0.571931	0.293	0.06	9.63364e-103	MG	creb3l2
ENSDARG00000063572~~perp	5.72975e-91	0.696044	0.247	0.051	1.86331e-86	MG	perp	8.09302e-153	0.812687	0.362	0.069	2.63185e-148	MG	perp
ENSDARG00000063661~~nuak2	2.69279e-82	0.626091	0.217	0.043	8.75695e-78	MG	nuak2	6.67111e-144	0.697206	0.242	0.027	2.16944e-139	MG	nuak2
ENSDARG00000067719~~wwtr1	2.41927e-153	0.877123	0.364	0.067	7.86748e-149	MG	wwtr1	2.36431e-96	0.645135	0.27	0.061	7.68875e-92	MG	wwtr1
ENSDARG00000067950~~zcchc2	3.24561e-63	0.578768	0.353	0.126	1.05547e-58	MG	zcchc2	6.47888e-123	0.676703	0.413	0.106	2.10693e-118	MG	zcchc2
ENSDARG00000067976~~ar	0	1.7086	0.844	0.108	0	MG	ar	0	1.31478	0.691	0.081	0	MG	ar
ENSDARG00000067984~~gas1b	0	1.43052	0.551	0.035	0	MG	gas1b	0	1.56342	0.756	0.068	0	MG	gas1b
ENSDARG00000068179~~trib2	6.89819e-133	0.797511	0.276	0.04	2.24329e-128	MG	trib2	4.63952e-190	0.846282	0.335	0.041	1.50877e-185	MG	trib2
ENSDARG00000068261~~pros1	2.61674e-230	1.07217	0.434	0.059	8.50963e-226	MG	pros1	1.53322e-273	1.08891	0.509	0.072	4.98605e-269	MG	pros1
ENSDARG00000068401~~yap1	0	1.5254	0.907	0.198	0	MG	yap1	0	1.3735	0.928	0.215	0	MG	yap1
ENSDARG00000068572~~slc16a1b	1.46303e-59	0.541749	0.252	0.075	4.75778e-55	MG	slc16a1b	4.4927e-77	0.540014	0.329	0.1	1.46102e-72	MG	slc16a1b
ENSDARG00000068586~~CU302253.1	0	2.39454	0.928	0.095	0	MG	CU302253.1	0	2.17534	0.923	0.09	0	MG	CU302253.1
ENSDARG00000068650~~fam214b	9.88288e-185	0.84967	0.314	0.033	3.21391e-180	MG	fam214b	2.05814e-209	0.875667	0.349	0.039	6.69308e-205	MG	fam214b
ENSDARG00000068710~~nid1a	1.8869e-98	0.584442	0.154	0.014	6.13619e-94	MG	nid1a	1.63275e-135	0.616106	0.187	0.014	5.30971e-131	MG	nid1a
ENSDARG00000068745~~map4l	9.58208e-282	1.20312	0.797	0.186	3.11609e-277	MG	map4l	6.42563e-237	1.19272	0.743	0.214	2.08961e-232	MG	map4l
ENSDARG00000068934~~cyp1b1	3.06621e-72	0.573481	0.202	0.042	9.9713e-68	MG	cyp1b1	1.92605e-106	0.75263	0.301	0.068	6.26351e-102	MG	cyp1b1
ENSDARG00000068967~~zgc:153372	1.28937e-267	1.12601	0.448	0.051	4.19302e-263	MG	zgc:153372	8.9059e-256	1.00104	0.495	0.074	2.8962e-251	MG	zgc:153372
ENSDARG00000068973~~pdlim4	3.08463e-149	0.882099	0.435	0.1	1.00312e-144	MG	pdlim4	1.15456e-87	0.619818	0.367	0.114	3.75462e-83	MG	pdlim4
ENSDARG00000069093~~col2a1a	0	2.45869	0.966	0.101	0	MG	col2a1a	0	1.93911	0.89	0.11	0	MG	col2a1a
ENSDARG00000069133~~mstnb	2.14544e-153	0.650985	0.144	0	6.97696e-149	MG	mstnb	7.45082e-120	0.523328	0.122	0.002	2.42301e-115	MG	mstnb
ENSDARG00000069171~~gramd4a	0	1.56142	0.937	0.243	0	MG	gramd4a	0	1.59075	0.906	0.204	0	MG	gramd4a
ENSDARG00000069185~~celsr1a	9.86161e-160	0.804011	0.963	0.466	3.20699e-155	MG	celsr1a	2.35841e-128	0.699465	0.899	0.38	7.66956e-124	MG	celsr1a
ENSDARG00000069432~~plscr3b	5.02135e-207	0.872983	0.273	0.016	1.63294e-202	MG	plscr3b	1.27323e-132	0.674059	0.244	0.032	4.14056e-128	MG	plscr3b
ENSDARG00000069440~~dachd	0	1.92302	0.982	0.376	0	MG	dachd	0	1.49707	0.985	0.365	0	MG	dachd
ENSDARG00000069484~~dab2ipa	0	1.70203	0.999	0.708	0	MG	dab2ipa	0	1.62577	0.995	0.653	0	MG	dab2ipa
ENSDARG00000069548~~zgc:162780	4.02297e-224	1.00109	0.356	0.035	1.30827e-219	MG	zgc:162780	2.40288e-236	0.995714	0.46	0.069	7.81417e-232	MG	zgc:162780
ENSDARG00000069594~~kif13a	7.28678e-92	0.671663	0.367	0.103	2.36966e-87	MG	kif13a	1.35021e-112	0.655193	0.384	0.099	4.39089e-108	MG	kif13a
ENSDARG00000069823~~proca1	4.48197e-302	1.55375	0.564	0.084	1.45754e-297	MG	proca1	5.21608e-185	0.891813	0.73	0.212	1.69627e-180	MG	proca1
ENSDARG00000069940~~ppap2d	0	2.63364	0.997	0.121	0	MG	ppap2d	0	2.3542	0.985	0.132	0	MG	ppap2d
ENSDARG00000069954~~kcnq5a	0	2.93671	0.946	0.057	0	MG	kcnq5a	0	2.52617	0.912	0.055	0	MG	kcnq5a
ENSDARG00000069956~~pdlim2	0	2.16499	0.68	0.013	0	MG	pdlim2	0	2.14681	0.664	0.008	0	MG	pdlim2
ENSDARG00000069980~~lman1	2.33432e-183	1.07117	0.425	0.08	7.59121e-179	MG	lman1	2.75382e-126	0.70378	0.418	0.108	8.95543e-122	MG	lman1
ENSDARG00000070025~~dchs1a	1.7609e-133	0.646967	0.163	0.007	5.72646e-129	MG	dchs1a	9.58222e-105	0.515714	0.118	0.004	3.11614e-100	MG	dchs1a
ENSDARG00000070094~~sytl1	4.24426e-148	0.863335	0.343	0.061	1.38023e-143	MG	sytl1	3.79377e-171	0.822594	0.406	0.074	1.23373e-166	MG	sytl1
ENSDARG00000070174~~PLEKHH3	7.41527e-138	0.849895	0.616	0.22	2.41145e-133	MG	PLEKHH3	6.71367e-125	0.675832	0.608	0.2	2.18329e-120	MG	PLEKHH3
ENSDARG00000070261~~crlf3	1.23229e-193	0.944793	0.339	0.039	4.0074e-189	MG	crlf3	1.95469e-102	0.605779	0.275	0.058	6.35666e-98	MG	crlf3
ENSDARG00000070266~~spock3	0	2.19476	0.959	0.134	0	MG	spock3	0	2.2121	0.938	0.139	0	MG	spock3
ENSDARG00000070314~~cald1a	0	1.31262	0.847	0.191	0	MG	cald1a	0	1.12656	0.777	0.16	0	MG	cald1a
ENSDARG00000070470~~sh3rf1	1.55326e-183	0.953437	0.684	0.217	5.05122e-179	MG	sh3rf1	4.74321e-97	0.565966	0.58	0.212	1.54249e-92	MG	sh3rf1
ENSDARG00000070538~~hey1	5.35946e-281	1.04691	0.328	0.013	1.7429e-276	MG	hey1	0	1.28824	0.462	0.018	0	MG	hey1
ENSDARG00000070603~~hspa12a	0	1.30141	0.574	0.069	0	MG	hspa12a	1.07173e-281	1.09883	0.49	0.067	3.48526e-277	MG	hspa12a
ENSDARG00000070681~~c1qtnf12	1.23228e-197	0.83335	0.27	0.018	4.00737e-193	MG	c1qtnf12	2.97873e-154	0.633827	0.208	0.014	9.68684e-150	MG	c1qtnf12
ENSDARG00000070721~~vdrb	1.22685e-199	0.990554	0.67	0.184	3.9897e-195	MG	vdrb	7.44658e-91	0.531315	0.482	0.163	2.42163e-86	MG	vdrb
ENSDARG00000070830~~zgc:136858	1.87198e-149	0.719025	0.192	0.01	6.08768e-145	MG	zgc:136858	1.87572e-168	0.702864	0.202	0.009	6.09985e-164	MG	zgc:136858
ENSDARG00000070995~~inpp4ab	1.61604e-263	1.08801	0.429	0.045	5.25536e-259	MG	inpp4ab	1.62891e-273	1.01815	0.447	0.051	5.29721e-269	MG	inpp4ab
ENSDARG00000071015~~pbxip1a	2.71411e-107	0.664255	0.255	0.043	8.82628e-103	MG	pbxip1a	4.90794e-276	0.983458	0.373	0.027	1.59606e-271	MG	pbxip1a
ENSDARG00000071116~~eepd1	8.3852e-154	0.902487	0.371	0.068	2.72687e-149	MG	eepd1	3.36064e-162	0.774816	0.389	0.071	1.09288e-157	MG	eepd1
ENSDARG00000071196~~cavin2b	0	1.19278	0.412	0.017	0	MG	cavin2b	2.43644e-276	0.97527	0.331	0.018	7.92331e-272	MG	cavin2b
ENSDARG00000071213~~rgl3a	0	2.18318	0.937	0.113	0	MG	rgl3a	0	2.11997	0.907	0.122	0	MG	rgl3a
ENSDARG00000071353~~ENSDARG00000071353	2.40469e-103	0.668779	0.232	0.036	7.82004e-99	MG	ENSDARG00000071353	7.94786e-77	0.515831	0.183	0.034	2.58465e-72	MG	ENSDARG00000071353
ENSDARG00000071460~~si:ch211-234p6.5	0	1.87229	0.665	0.003	0	MG	si:ch211-234p6.5	0	1.61155	0.545	0.004	0	MG	si:ch211-234p6.5
ENSDARG00000071626~~ptgdsb.2	0	3.74419	0.802	0.009	0	MG	ptgdsb.2	0	3.88397	0.904	0.011	0	MG	ptgdsb.2
ENSDARG00000071673~~ctdspla	8.95161e-134	0.774972	0.81	0.328	2.91106e-129	MG	ctdspla	8.34016e-102	0.546812	0.779	0.297	2.71222e-97	MG	ctdspla
ENSDARG00000071692~~prex2	0	2.78537	0.998	0.276	0	MG	prex2	0	2.84184	0.993	0.283	0	MG	prex2
ENSDARG00000073684~~quo	3.04469e-201	0.973784	0.33	0.035	9.90133e-197	MG	quo	0	1.14659	0.448	0.033	0	MG	quo
ENSDARG00000073688~~nav2a	0	2.13734	0.997	0.325	0	MG	nav2a	0	2.29436	0.983	0.249	0	MG	nav2a
ENSDARG00000073707~~cnksr2b	1.42737e-86	0.615528	0.244	0.05	4.64181e-82	MG	cnksr2b	9.66697e-132	0.697498	0.297	0.052	3.1437e-127	MG	cnksr2b
ENSDARG00000073753~~tacc1	1.52612e-299	1.19835	0.51	0.061	4.96295e-295	MG	tacc1	0	1.16318	0.561	0.065	0	MG	tacc1
ENSDARG00000073917~~b3glcta	9.40748e-81	0.641658	0.389	0.125	3.05931e-76	MG	b3glcta	1.64963e-134	0.749069	0.368	0.08	5.36459e-130	MG	b3glcta
ENSDARG00000073957~~tox3	6.25934e-199	0.960685	0.959	0.344	2.03554e-194	MG	tox3	3.94637e-83	0.51707	0.899	0.405	1.28336e-78	MG	tox3
ENSDARG00000074004~~stac	0	1.36428	0.717	0.151	0	MG	stac	0	1.207	0.68	0.125	0	MG	stac
ENSDARG00000074184~~arhgap32b	0	1.68234	0.945	0.251	0	MG	arhgap32b	7.71595e-230	1.04096	0.84	0.283	2.50923e-225	MG	arhgap32b
ENSDARG00000074235~~CR376783.1	0	2.78611	0.975	0.093	0	MG	CR376783.1	0	2.35926	0.926	0.082	0	MG	CR376783.1
ENSDARG00000074275~~limch1a	1.21051e-286	1.13725	0.716	0.133	3.93659e-282	MG	limch1a	9.75402e-207	0.841158	0.596	0.13	3.17201e-202	MG	limch1a
ENSDARG00000074311~~mast2	2.16577e-102	0.61481	0.916	0.501	7.0431e-98	MG	mast2	1.98965e-78	0.500745	0.761	0.333	6.47035e-74	MG	mast2
ENSDARG00000074335~~boc	0	2.38553	0.991	0.176	0	MG	boc	0	2.20471	0.951	0.186	0	MG	boc
ENSDARG00000074381~~farp1	8.0714e-127	0.763974	0.72	0.273	2.62482e-122	MG	farp1	5.8448e-260	0.984652	0.835	0.214	1.90073e-255	MG	farp1
ENSDARG00000074527~~chst15	0	2.03201	0.855	0.045	0	MG	chst15	0	1.89283	0.846	0.052	0	MG	chst15
ENSDARG00000074563~~gpr37a	0	2.43213	0.995	0.2	0	MG	gpr37a	0	1.95636	0.941	0.166	0	MG	gpr37a
ENSDARG00000074635~~abca1a	0	1.71061	0.973	0.286	0	MG	abca1a	0	1.27671	0.972	0.471	0	MG	abca1a
ENSDARG00000074636~~cep170b	0	1.63429	0.848	0.129	0	MG	cep170b	0	1.55055	0.838	0.115	0	MG	cep170b
ENSDARG00000074695~~mertka	0	1.38699	0.547	0.033	0	MG	mertka	0	1.31488	0.543	0.035	0	MG	mertka
ENSDARG00000074752~~hlfa	6.05466e-143	0.815663	0.511	0.134	1.96898e-138	MG	hlfa	9.9157e-196	0.790137	0.703	0.183	3.22459e-191	MG	hlfa
ENSDARG00000074806~~afap1l2	2.54596e-174	0.784073	0.266	0.023	8.27946e-170	MG	afap1l2	3.35272e-157	0.723172	0.232	0.021	1.0903e-152	MG	afap1l2
ENSDARG00000074863~~TMEM132C	1.25267e-96	0.686688	0.352	0.095	4.07367e-92	MG	TMEM132C	4.45317e-170	0.86541	0.405	0.079	1.44817e-165	MG	TMEM132C
ENSDARG00000075034~~raver2	4.45694e-198	0.96494	0.88	0.359	1.4494e-193	MG	raver2	2.12146e-190	0.827414	0.893	0.294	6.899e-186	MG	raver2
ENSDARG00000075045~~cxcl18b	3.59552e-132	1.1386	0.235	0.026	1.16926e-127	MG	cxcl18b	3.24544e-136	1.22917	0.332	0.067	1.05542e-131	MG	cxcl18b
ENSDARG00000075110~~dab2ipb	1.32075e-181	0.839744	0.925	0.396	4.29507e-177	MG	dab2ipb	6.68114e-197	0.885594	0.938	0.378	2.17271e-192	MG	dab2ipb
ENSDARG00000075188~~adamts10	2.51697e-158	0.854498	0.274	0.031	8.18519e-154	MG	adamts10	0	1.18557	0.358	0.01	0	MG	adamts10
ENSDARG00000075249~~fam171a2a	1.13714e-92	0.644042	0.784	0.42	3.69798e-88	MG	fam171a2a	1.56689e-76	0.518935	0.787	0.366	5.09554e-72	MG	fam171a2a
ENSDARG00000075253~~pik3cb	4.26082e-210	0.990576	0.371	0.045	1.38562e-205	MG	pik3cb	1.04209e-197	0.885041	0.353	0.047	3.38889e-193	MG	pik3cb
ENSDARG00000075352~~brinp3b	6.59098e-231	1.09188	0.396	0.044	2.14339e-226	MG	brinp3b	2.15727e-197	0.852441	0.26	0.017	7.01544e-193	MG	brinp3b
ENSDARG00000075513~~ccdc136b	2.72937e-111	0.584291	0.157	0.011	8.87592e-107	MG	ccdc136b	8.84336e-150	0.608254	0.179	0.008	2.87586e-145	MG	ccdc136b
ENSDARG00000075540~~FAM107A	4.63559e-302	1.07792	0.353	0.015	1.50749e-297	MG	FAM107A	2.20737e-266	0.906405	0.287	0.009	7.17835e-262	MG	FAM107A
ENSDARG00000075556~~luzp1	0	1.24627	0.588	0.089	0	MG	luzp1	2.92249e-158	0.825082	0.457	0.11	9.50392e-154	MG	luzp1
ENSDARG00000075557~~apcdd1l	2.79602e-106	0.637215	0.212	0.029	9.09267e-102	MG	apcdd1l	3.88542e-262	0.991896	0.393	0.037	1.26354e-257	MG	apcdd1l
ENSDARG00000075759~~samd4a	1.14712e-92	0.72454	0.308	0.079	3.73045e-88	MG	samd4a	7.21555e-78	0.536348	0.288	0.08	2.3465e-73	MG	samd4a
ENSDARG00000075793~~prex1	0	2.90532	0.995	0.12	0	MG	prex1	0	2.91529	0.979	0.105	0	MG	prex1
ENSDARG00000075929~~si:dkey-219c10.4	1.7098e-291	1.0287	0.268	0	5.56026e-287	MG	si:dkey-219c10.4	2.5792e-176	0.626131	0.162	0	8.38754e-172	MG	si:dkey-219c10.4
ENSDARG00000075963~~mhc1uba	0	1.66909	0.9	0.243	0	MG	mhc1uba	0	1.58249	0.842	0.163	0	MG	mhc1uba
ENSDARG00000076179~~ngef	0	1.80408	0.777	0.054	0	MG	ngef	0	1.61218	0.701	0.035	0	MG	ngef
ENSDARG00000076292~~tns2a	8.68085e-199	1.00245	0.431	0.072	2.82301e-194	MG	tns2a	5.57807e-231	1.07902	0.471	0.083	1.81399e-226	MG	tns2a
ENSDARG00000076302~~dtx4a	1.39805e-249	1.12508	0.823	0.236	4.54645e-245	MG	dtx4a	1.64218e-214	0.883147	0.778	0.211	5.34038e-210	MG	dtx4a
ENSDARG00000076404~~mctp1a	6.97484e-226	1.04124	0.424	0.056	2.26822e-221	MG	mctp1a	1.32399e-167	0.78701	0.388	0.071	4.30563e-163	MG	mctp1a
ENSDARG00000076414~~espn	0	1.44862	0.991	0.43	0	MG	espn	0	1.7212	0.964	0.273	0	MG	espn
ENSDARG00000076440~~btbd6a	5.08695e-177	0.969746	0.445	0.082	1.65428e-172	MG	btbd6a	0	1.24937	0.604	0.075	0	MG	btbd6a
ENSDARG00000076495~~vwc2	8.45968e-131	0.735447	0.271	0.039	2.75109e-126	MG	vwc2	2.04947e-138	0.662317	0.224	0.023	6.66488e-134	MG	vwc2
ENSDARG00000076564~~hspg2	0	3.155	0.998	0.115	0	MG	hspg2	0	2.99172	0.993	0.149	0	MG	hspg2
ENSDARG00000076657~~plagl2	4.7115e-168	0.947378	0.583	0.171	1.53218e-163	MG	plagl2	1.23775e-97	0.651001	0.433	0.138	4.02516e-93	MG	plagl2
ENSDARG00000076787~~angpt4	0	2.08831	0.849	0.101	0	MG	angpt4	0	1.70872	0.896	0.115	0	MG	angpt4
ENSDARG00000076796~~dlg3	0	1.495	0.987	0.334	0	MG	dlg3	0	1.25766	0.98	0.375	0	MG	dlg3
ENSDARG00000076801~~arap3	6.25977e-185	0.982434	0.547	0.138	2.03568e-180	MG	arap3	1.13603e-187	0.899303	0.535	0.127	3.69437e-183	MG	arap3
ENSDARG00000076804~~ttyh1	7.7116e-155	0.840878	0.782	0.299	2.50781e-150	MG	ttyh1	2.17468e-97	0.619647	0.749	0.339	7.07206e-93	MG	ttyh1
ENSDARG00000076867~~mrtfbb	3.44173e-97	0.720387	0.485	0.175	1.11925e-92	MG	mrtfbb	5.95771e-91	0.59957	0.475	0.17	1.93745e-86	MG	mrtfbb
ENSDARG00000076919~~igdcc4	7.41847e-239	1.062	0.592	0.109	2.41249e-234	MG	igdcc4	3.41286e-256	0.986954	0.532	0.084	1.10986e-251	MG	igdcc4
ENSDARG00000076933~~aldh1a3	8.31045e-219	1.23307	0.377	0.046	2.70256e-214	MG	aldh1a3	1.73849e-155	1.0005	0.335	0.059	5.65355e-151	MG	aldh1a3
ENSDARG00000076994~~adgra2	0	2.94293	0.997	0.128	0	MG	adgra2	0	2.41134	0.988	0.173	0	MG	adgra2
ENSDARG00000077052~~tnrc18	8.22704e-159	0.853318	0.727	0.263	2.67543e-154	MG	tnrc18	3.35477e-183	0.801205	0.761	0.238	1.09097e-178	MG	tnrc18
ENSDARG00000077138~~zgc:195173	0	2.37772	0.79	0.022	0	MG	zgc:195173	0	2.35716	0.845	0.057	0	MG	zgc:195173
ENSDARG00000077176~~zgc:174888	0	1.72166	0.64	0.036	0	MG	zgc:174888	0	1.57253	0.678	0.036	0	MG	zgc:174888
ENSDARG00000077229~~ano8b	1.97026e-234	1.06116	0.431	0.055	6.4073e-230	MG	ano8b	2.56659e-235	0.919223	0.457	0.065	8.34657e-231	MG	ano8b
ENSDARG00000077298~~gas1a	1.98946e-107	0.565495	0.155	0.011	6.46972e-103	MG	gas1a	3.4727e-109	0.501028	0.147	0.01	1.12932e-104	MG	gas1a
ENSDARG00000077383~~anxa11a	1.34261e-121	0.757895	0.314	0.062	4.36616e-117	MG	anxa11a	3.75467e-169	0.777901	0.388	0.068	1.22102e-164	MG	anxa11a
ENSDARG00000077596~~phf24	0	1.60652	0.718	0.068	0	MG	phf24	0	1.38661	0.809	0.127	0	MG	phf24
ENSDARG00000077691~~slc13a5a	0	1.0802	0.31	0.003	0	MG	slc13a5a	1.60126e-233	0.858999	0.25	0.007	5.20729e-229	MG	slc13a5a
ENSDARG00000077749~~usp54b	0	1.48041	0.93	0.295	0	MG	usp54b	0	1.41136	0.894	0.214	0	MG	usp54b
ENSDARG00000077762~~si:rp71-79p20.2	0	1.55944	0.965	0.309	0	MG	si:rp71-79p20.2	0	1.33226	0.929	0.275	0	MG	si:rp71-79p20.2
ENSDARG00000077788~~arhgef10	0	1.5653	0.681	0.053	0	MG	arhgef10	0	1.29119	0.539	0.042	0	MG	arhgef10
ENSDARG00000077864~~rasgrp3	0	2.52765	0.995	0.207	0	MG	rasgrp3	0	2.4596	0.993	0.244	0	MG	rasgrp3
ENSDARG00000077881~~chl1a	0	2.0768	0.989	0.241	0	MG	chl1a	0	2.35515	0.964	0.139	0	MG	chl1a
ENSDARG00000077967~~si:ch211-140m22.7	3.13833e-77	0.567765	0.595	0.231	1.02059e-72	MG	si:ch211-140m22.7	2.38623e-110	0.522742	0.69	0.231	7.76001e-106	MG	si:ch211-140m22.7
ENSDARG00000078006~~wscd1b	3.63947e-191	0.88215	0.261	0.017	1.18355e-186	MG	wscd1b	1.04901e-157	0.675779	0.185	0.008	3.41138e-153	MG	wscd1b
ENSDARG00000078026~~zcchc24	0	1.4568	0.617	0.052	0	MG	zcchc24	0	1.17216	0.503	0.05	0	MG	zcchc24
ENSDARG00000078179~~fndc3ba	0	1.6879	0.893	0.177	0	MG	fndc3ba	0	1.33528	0.813	0.175	0	MG	fndc3ba
ENSDARG00000078258~~CABZ01049847.1	0	1.38003	0.706	0.083	0	MG	CABZ01049847.1	0	1.19465	0.544	0.04	0	MG	CABZ01049847.1
ENSDARG00000078270~~CU467961.1	1.32469e-61	0.584625	0.743	0.429	4.30788e-57	MG	CU467961.1	2.84619e-95	0.601791	0.658	0.267	9.2558e-91	MG	CU467961.1
ENSDARG00000078308~~spry2	1.57121e-49	0.508796	0.187	0.052	5.10958e-45	MG	spry2	1.28615e-98	0.605615	0.306	0.073	4.18257e-94	MG	spry2
ENSDARG00000078335~~amot	0	1.80466	0.88	0.111	0	MG	amot	0	1.35786	0.704	0.097	0	MG	amot
ENSDARG00000078399~~acsl2	0	1.69798	0.879	0.144	0	MG	acsl2	0	2.01156	0.887	0.127	0	MG	acsl2
ENSDARG00000078504~~si:ch73-60h1.1	7.64149e-157	0.821116	0.34	0.052	2.48501e-152	MG	si:ch73-60h1.1	6.5367e-134	0.677717	0.353	0.072	2.12574e-129	MG	si:ch73-60h1.1
ENSDARG00000078512~~acaca	0	1.74898	0.989	0.392	0	MG	acaca	0	1.74759	0.977	0.297	0	MG	acaca
ENSDARG00000078523~~ddr1	6.29243e-173	0.821743	0.679	0.193	2.0463e-168	MG	ddr1	6.00151e-153	0.569734	0.692	0.199	1.95169e-148	MG	ddr1
ENSDARG00000078618~~inpp5kb	2.1971e-163	0.925147	0.378	0.066	7.14499e-159	MG	inpp5kb	4.74043e-153	0.741824	0.279	0.035	1.54159e-148	MG	inpp5kb
ENSDARG00000078733~~cnnm2b	6.78362e-167	0.753237	0.223	0.014	2.20603e-162	MG	cnnm2b	8.84773e-152	0.669477	0.196	0.012	2.87728e-147	MG	cnnm2b
ENSDARG00000078741~~FRMD1	6.14645e-196	0.903496	0.929	0.384	1.99882e-191	MG	FRMD1	7.66509e-135	0.667566	0.925	0.384	2.49269e-130	MG	FRMD1
ENSDARG00000078888~~iqgap1	0	1.31263	0.521	0.047	0	MG	iqgap1	2.68716e-230	0.946412	0.384	0.046	8.73865e-226	MG	iqgap1
ENSDARG00000078916~~chrdl2	0	1.66127	0.401	0.022	0	MG	chrdl2	1.38384e-258	1.43275	0.382	0.039	4.50026e-254	MG	chrdl2
ENSDARG00000079029~~dhx32b	3.58335e-146	0.820664	0.821	0.329	1.1653e-141	MG	dhx32b	1.55787e-157	0.708685	0.738	0.218	5.0662e-153	MG	dhx32b
ENSDARG00000079148~~nckap5l	4.22693e-78	0.607124	0.493	0.183	1.3746e-73	MG	nckap5l	7.67093e-95	0.547898	0.443	0.14	2.49459e-90	MG	nckap5l
ENSDARG00000079191~~zgc:172122	2.23538e-243	0.836863	0.232	0.001	7.26945e-239	MG	zgc:172122	2.6721e-210	0.688854	0.199	0.001	8.68966e-206	MG	zgc:172122
ENSDARG00000079201~~tshz2	3.11213e-247	1.00833	0.935	0.336	1.01206e-242	MG	tshz2	2.63281e-135	0.555269	0.892	0.356	8.56189e-131	MG	tshz2
ENSDARG00000079307~~si:dkey-205h13.1	1.44874e-103	0.721311	0.449	0.136	4.71131e-99	MG	si:dkey-205h13.1	5.45249e-268	1.10558	0.565	0.102	1.77315e-263	MG	si:dkey-205h13.1
ENSDARG00000079312~~kmt2ca	1.91417e-230	0.699968	0.994	0.763	6.22488e-226	MG	kmt2ca	6.68356e-154	0.70468	0.974	0.596	2.17349e-149	MG	kmt2ca
ENSDARG00000079378~~phldb1b	2.85e-78	0.553565	0.888	0.53	9.26821e-74	MG	phldb1b	2.00096e-93	0.580631	0.904	0.463	6.50712e-89	MG	phldb1b
ENSDARG00000079446~~TAFA3	0	1.73454	0.64	0.007	0	MG	TAFA3	0	1.47962	0.537	0.012	0	MG	TAFA3
ENSDARG00000079455~~nlgn4xa	4.68331e-144	0.672374	0.444	0.097	1.52301e-139	MG	nlgn4xa	3.8603e-171	0.861136	0.436	0.088	1.25537e-166	MG	nlgn4xa
ENSDARG00000079530~~si:dkey-17m8.1	6.40163e-85	0.65102	0.211	0.039	2.08181e-80	MG	si:dkey-17m8.1	3.77435e-111	0.622406	0.247	0.041	1.22742e-106	MG	si:dkey-17m8.1
ENSDARG00000079547~~zbtb47b	4.033e-194	0.808176	0.237	0.011	1.31153e-189	MG	zbtb47b	1.28047e-171	0.721354	0.206	0.01	4.1641e-167	MG	zbtb47b
ENSDARG00000079578~~rbpms2b	0	1.28403	0.878	0.162	0	MG	rbpms2b	0	0.885382	0.938	0.253	0	MG	rbpms2b
ENSDARG00000079588~~castor1	0	2.18442	0.989	0.15	0	MG	castor1	0	2.08317	0.978	0.14	0	MG	castor1
ENSDARG00000079705~~si:ch211-152p11.4	1.3576e-150	0.579107	0.144	0.001	4.4149e-146	MG	si:ch211-152p11.4	1.04003e-237	0.782153	0.229	0.002	3.38218e-233	MG	si:ch211-152p11.4
ENSDARG00000079738~~znf219	6.48531e-121	0.725874	0.307	0.056	2.10902e-116	MG	znf219	1.43533e-126	0.68256	0.327	0.065	4.6677e-122	MG	znf219
ENSDARG00000079745~~si:ch211-166a6.5	5.9838e-82	0.574198	0.169	0.024	1.94593e-77	MG	si:ch211-166a6.5	1.60286e-93	0.556204	0.19	0.029	5.21249e-89	MG	si:ch211-166a6.5
ENSDARG00000079756~~peak1	5.0673e-67	0.581866	0.271	0.078	1.64789e-62	MG	peak1	2.11619e-105	0.630489	0.262	0.052	6.88184e-101	MG	peak1
ENSDARG00000079872~~rapgef4	7.42521e-165	0.70438	0.194	0.007	2.41468e-160	MG	rapgef4	2.36089e-223	0.789341	0.237	0.006	7.6776e-219	MG	rapgef4
ENSDARG00000079917~~rassf7a	0	1.74806	0.952	0.26	0	MG	rassf7a	4.27987e-252	1.05265	0.926	0.318	1.39181e-247	MG	rassf7a
ENSDARG00000079967~~prkd3	0	1.98788	0.971	0.224	0	MG	prkd3	0	1.69523	0.946	0.231	0	MG	prkd3
ENSDARG00000079978~~samd10a	4.70235e-124	0.5397	0.137	0.004	1.5292e-119	MG	samd10a	8.00791e-171	0.680202	0.194	0.007	2.60417e-166	MG	samd10a
ENSDARG00000086033~~tspan5a	1.66902e-87	0.626311	0.613	0.241	5.42764e-83	MG	tspan5a	3.54551e-177	0.751199	0.672	0.182	1.153e-172	MG	tspan5a
ENSDARG00000086269~~ndst2a	1.81243e-299	1.03646	0.998	0.58	5.89404e-295	MG	ndst2a	5.44008e-135	0.707295	0.974	0.547	1.76911e-130	MG	ndst2a
ENSDARG00000086669~~edn3b	2.17913e-249	0.923276	0.231	0	7.08652e-245	MG	edn3b	8.63662e-161	0.587711	0.146	0	2.80863e-156	MG	edn3b
ENSDARG00000086746~~prodha	1.54534e-59	0.555165	0.215	0.056	5.02546e-55	MG	prodha	4.66536e-128	0.66392	0.257	0.037	1.51718e-123	MG	prodha
ENSDARG00000086842~~dap1b	2.31703e-113	0.528253	0.135	0.005	7.53497e-109	MG	dap1b	2.8583e-128	0.604468	0.239	0.031	9.29518e-124	MG	dap1b
ENSDARG00000086853~~dpyda.3	3.61281e-154	0.9233	0.444	0.098	1.17488e-149	MG	dpyda.3	9.32533e-155	0.74345	0.33	0.052	3.0326e-150	MG	dpyda.3
ENSDARG00000086950~~si:ch211-269k10.2	4.97879e-133	0.799007	0.29	0.047	1.6191e-128	MG	si:ch211-269k10.2	1.69578e-176	0.821672	0.309	0.038	5.51466e-172	MG	si:ch211-269k10.2
ENSDARG00000087260~~mtss1lb	0	1.94734	0.995	0.322	0	MG	mtss1lb	0	1.95262	0.982	0.306	0	MG	mtss1lb
ENSDARG00000087446~~mmd2a	5.81933e-166	0.793498	0.226	0.015	1.89245e-161	MG	mmd2a	3.78616e-243	0.873777	0.282	0.013	1.23126e-238	MG	mmd2a
ENSDARG00000087657~~fasn	9.49797e-140	0.825482	0.84	0.375	3.08874e-135	MG	fasn	3.80109e-100	0.619059	0.808	0.355	1.23611e-95	MG	fasn
ENSDARG00000087688~~klhl29	1.96751e-266	1.09416	0.951	0.412	6.39833e-262	MG	klhl29	5.93691e-131	0.724016	0.87	0.429	1.93068e-126	MG	klhl29
ENSDARG00000087804~~tnfrsf11a	0	1.32891	0.577	0.071	0	MG	tnfrsf11a	5.67848e-258	1.03703	0.479	0.068	1.84664e-253	MG	tnfrsf11a
ENSDARG00000087822~~agap3	2.41396e-168	0.905285	0.884	0.388	7.8502e-164	MG	agap3	2.52724e-106	0.657174	0.838	0.4	8.2186e-102	MG	agap3
ENSDARG00000087867~~SLC2A13	3.74131e-188	0.954332	0.417	0.071	1.21667e-183	MG	SLC2A13	5.72825e-257	0.992012	0.452	0.059	1.86283e-252	MG	SLC2A13
ENSDARG00000087907~~ndufa4l2b	0	2.49434	0.962	0.021	0	MG	ndufa4l2b	0	2.14215	0.827	0.02	0	MG	ndufa4l2b
ENSDARG00000087921~~plce1	1.56271e-255	1.17511	0.918	0.259	5.08194e-251	MG	plce1	3.40765e-241	1.02695	0.896	0.284	1.10817e-236	MG	plce1
ENSDARG00000088247~~si:ch1073-303k11.2	3.50831e-201	0.905463	0.294	0.023	1.1409e-196	MG	si:ch1073-303k11.2	0	1.19306	0.463	0.03	0	MG	si:ch1073-303k11.2
ENSDARG00000088255~~smoc1	2.65783e-65	1.01412	0.222	0.057	8.64327e-61	MG	smoc1	4.71846e-75	1.16411	0.215	0.051	1.53444e-70	MG	smoc1
ENSDARG00000088515~~st6gal2b	4.98904e-268	1.12882	0.444	0.049	1.62244e-263	MG	st6gal2b	0	1.35722	0.571	0.042	0	MG	st6gal2b
ENSDARG00000088898~~caln1	2.02931e-70	0.528606	0.2	0.041	6.59931e-66	MG	caln1	2.93105e-92	0.583352	0.251	0.054	9.53178e-88	MG	caln1
ENSDARG00000088959~~pdxka	3.36447e-105	0.645097	0.225	0.034	1.09412e-100	MG	pdxka	7.54803e-81	0.508366	0.204	0.039	2.45462e-76	MG	pdxka
ENSDARG00000089187~~wfdc2	1.31688e-163	0.732443	0.196	0.008	4.28248e-159	MG	wfdc2	5.78908e-260	0.908348	0.275	0.008	1.88261e-255	MG	wfdc2
ENSDARG00000089190~~tanc1b	0	1.25254	0.977	0.422	0	MG	tanc1b	6.91383e-274	1.0824	0.975	0.444	2.24838e-269	MG	tanc1b
ENSDARG00000089314~~mapta	7.92202e-129	0.765868	0.668	0.222	2.57624e-124	MG	mapta	1.2222e-116	0.5686	0.53	0.161	3.97458e-112	MG	mapta
ENSDARG00000089418~~si:dkey-164f24.2	0	2.13274	0.783	0.01	0	MG	si:dkey-164f24.2	0	2.12739	0.721	0.025	0	MG	si:dkey-164f24.2
ENSDARG00000089564~~MDFI	1.62538e-99	0.73514	0.368	0.102	5.28575e-95	MG	MDFI	5.01886e-70	0.522833	0.329	0.105	1.63213e-65	MG	MDFI
ENSDARG00000089701~~trabd2a	9.71882e-169	0.737134	0.19	0.006	3.16056e-164	MG	trabd2a	3.89703e-188	0.722423	0.211	0.008	1.26731e-183	MG	trabd2a
ENSDARG00000089824~~lpar4	1.49417e-270	0.941774	0.266	0.003	4.85903e-266	MG	lpar4	1.54043e-176	0.650757	0.179	0.003	5.00946e-172	MG	lpar4
ENSDARG00000089871~~jcada	0	1.27774	0.548	0.045	0	MG	jcada	0	1.36515	0.596	0.052	0	MG	jcada
ENSDARG00000089878~~nedd9	0	1.47655	0.888	0.193	0	MG	nedd9	0	1.4368	0.83	0.181	0	MG	nedd9
ENSDARG00000090039~~reck	2.54095e-175	0.932092	0.624	0.182	8.26316e-171	MG	reck	1.46259e-158	0.768355	0.71	0.226	4.75635e-154	MG	reck
ENSDARG00000090071~~rxfp1	5.52648e-168	0.810103	0.262	0.024	1.79721e-163	MG	rxfp1	1.18856e-96	0.513705	0.173	0.021	3.86521e-92	MG	rxfp1
ENSDARG00000090170~~rab11fip4a	3.31674e-82	0.581578	0.964	0.59	1.0786e-77	MG	rab11fip4a	7.66128e-205	0.901457	0.978	0.533	2.49145e-200	MG	rab11fip4a
ENSDARG00000090255~~phlpp2	6.28657e-82	0.620018	0.268	0.063	2.04439e-77	MG	phlpp2	1.35991e-77	0.519968	0.21	0.044	4.42243e-73	MG	phlpp2
ENSDARG00000090338~~fam20cb	0	1.49008	0.699	0.085	0	MG	fam20cb	2.79865e-184	0.858532	0.463	0.095	9.10122e-180	MG	fam20cb
ENSDARG00000090398~~PDE1C	1.53506e-253	0.930852	0.286	0.009	4.99203e-249	MG	PDE1C	2.14457e-269	0.964282	0.313	0.014	6.97414e-265	MG	PDE1C
ENSDARG00000090552~~si:dkey-7j14.6	0	1.47612	0.843	0.191	0	MG	si:dkey-7j14.6	0	1.46076	0.886	0.252	0	MG	si:dkey-7j14.6
ENSDARG00000090560~~mfap5	0	2.45817	0.756	0.006	0	MG	mfap5	0	2.67729	0.79	0.005	0	MG	mfap5
ENSDARG00000090690~~nell2a	2.74143e-104	0.688708	0.242	0.041	8.91512e-100	MG	nell2a	1.19283e-140	0.733784	0.262	0.036	3.87909e-136	MG	nell2a
ENSDARG00000090903~~creb3l3b	6.06393e-289	1.04848	0.317	0.01	1.97199e-284	MG	creb3l3b	0	1.1288	0.379	0.005	0	MG	creb3l3b
ENSDARG00000091061~~slc38a3b	0	2.49283	0.948	0.06	0	MG	slc38a3b	0	2.40285	0.904	0.086	0	MG	slc38a3b
ENSDARG00000091127~~klf15	1.67037e-127	0.537291	0.141	0.004	5.43204e-123	MG	klf15	3.43684e-126	0.544581	0.146	0.006	1.11766e-121	MG	klf15
ENSDARG00000091342~~adcy5	3.43109e-262	1.12573	0.717	0.173	1.11579e-257	MG	adcy5	1.45604e-195	0.870653	0.667	0.178	4.73504e-191	MG	adcy5
ENSDARG00000091348~~rtn3	2.41961e-273	1.18617	0.925	0.35	7.86858e-269	MG	rtn3	6.21238e-275	1.11065	0.954	0.378	2.02027e-270	MG	rtn3
ENSDARG00000091723~~si:ch211-202f3.4	0	1.27339	0.393	0.001	0	MG	si:ch211-202f3.4	0	1.38279	0.458	0.001	0	MG	si:ch211-202f3.4
ENSDARG00000092499~~si:ch211-183d21.1	5.32364e-109	0.804616	0.293	0.062	1.73125e-104	MG	si:ch211-183d21.1	3.58909e-102	0.694837	0.33	0.085	1.16717e-97	MG	si:ch211-183d21.1
ENSDARG00000092517~~gpsm1a	8.40757e-174	0.882075	0.303	0.035	2.73414e-169	MG	gpsm1a	4.67107e-171	0.80029	0.305	0.039	1.51903e-166	MG	gpsm1a
ENSDARG00000092671~~pard3ba	1.07776e-223	1.03665	0.781	0.23	3.50488e-219	MG	pard3ba	4.82782e-235	0.995121	0.863	0.272	1.57001e-230	MG	pard3ba
ENSDARG00000093201~~si:dkey-112e17.1	0	1.07862	0.319	0.006	0	MG	si:dkey-112e17.1	2.00377e-145	0.597578	0.156	0.004	6.51625e-141	MG	si:dkey-112e17.1
ENSDARG00000093549~~selenop	0	3.44019	0.943	0.023	0	MG	selenop	0	4.02793	0.966	0.055	0	MG	selenop
ENSDARG00000093569~~bckdhbl	0	1.38561	0.629	0.076	0	MG	bckdhbl	1.15641e-268	1.0888	0.643	0.133	3.76066e-264	MG	bckdhbl
ENSDARG00000094064~~CR788236.1	3.34857e-303	1.26779	0.747	0.172	1.08895e-298	MG	CR788236.1	1.77177e-258	1.08224	0.691	0.162	5.76179e-254	MG	CR788236.1
ENSDARG00000094301~~BX537274.1	1.10679e-133	0.839489	0.595	0.209	3.59928e-129	MG	BX537274.1	5.31764e-73	0.557709	0.466	0.184	1.7293e-68	MG	BX537274.1
ENSDARG00000094382~~BX649266.1	1.82761e-112	0.688854	0.26	0.043	5.94339e-108	MG	BX649266.1	0	1.29346	0.404	0.03	0	MG	BX649266.1
ENSDARG00000094533~~si:dkey-246e1.3	3.89103e-167	0.654008	0.165	0.002	1.26536e-162	MG	si:dkey-246e1.3	6.18426e-196	0.670984	0.191	0.002	2.01112e-191	MG	si:dkey-246e1.3
ENSDARG00000094704~~bcl2a	3.99962e-237	1.16054	0.892	0.329	1.30068e-232	MG	bcl2a	5.25845e-220	1.007	0.865	0.298	1.71005e-215	MG	bcl2a
ENSDARG00000094857~~dio2	5.07446e-231	0.993473	0.326	0.024	1.65021e-226	MG	dio2	6.47083e-251	1.02949	0.379	0.035	2.10431e-246	MG	dio2
ENSDARG00000095312~~sc:d0202	1.22321e-171	0.796677	0.253	0.021	3.97788e-167	MG	sc:d0202	8.61463e-126	0.635511	0.206	0.022	2.80148e-121	MG	sc:d0202
ENSDARG00000095715~~BX465834.1	0	2.45143	0.998	0.351	0	MG	BX465834.1	0	2.27193	0.993	0.398	0	MG	BX465834.1
ENSDARG00000095865~~oxr1a	0	1.32751	0.573	0.077	0	MG	oxr1a	5.47424e-203	0.9387	0.413	0.066	1.78022e-198	MG	oxr1a
ENSDARG00000095906~~CR848047.1	0	1.81331	0.996	0.325	0	MG	CR848047.1	0	1.65316	0.993	0.353	0	MG	CR848047.1
ENSDARG00000096635~~si:ch211-122h15.4	0	2.37479	0.994	0.157	0	MG	si:ch211-122h15.4	0	2.26525	0.975	0.157	0	MG	si:ch211-122h15.4
ENSDARG00000096849~~si:dkey-16p21.8	3.15857e-213	0.83796	0.231	0.006	1.02717e-208	MG	si:dkey-16p21.8	0	1.30124	0.546	0.044	0	MG	si:dkey-16p21.8
ENSDARG00000096853~~BX572077.1	3.76764e-83	0.544195	0.171	0.024	1.22524e-78	MG	BX572077.1	1.75094e-134	0.655262	0.227	0.026	5.69407e-130	MG	BX572077.1
ENSDARG00000096867~~clmn	0	1.91998	0.907	0.093	0	MG	clmn	0	1.88404	0.907	0.096	0	MG	clmn
ENSDARG00000097017~~mical3a	6.62598e-123	0.680386	0.942	0.541	2.15477e-118	MG	mical3a	3.34758e-100	0.687349	0.88	0.458	1.08863e-95	MG	mical3a
ENSDARG00000097057~~fxyd6l	0	2.57601	0.978	0.071	0	MG	fxyd6l	0	2.7675	0.988	0.131	0	MG	fxyd6l
ENSDARG00000097163~~CR385035.1	3.96631e-63	0.520529	0.208	0.05	1.28984e-58	MG	CR385035.1	2.33002e-99	0.561685	0.215	0.035	7.57721e-95	MG	CR385035.1
ENSDARG00000097239~~si:ch73-31d8.2	2.21834e-168	0.809405	0.249	0.02	7.21405e-164	MG	si:ch73-31d8.2	1.33809e-286	1.004	0.338	0.016	4.35148e-282	MG	si:ch73-31d8.2
ENSDARG00000097317~~si:dkey-276j7.3	4.57142e-142	0.656336	0.188	0.011	1.48663e-137	MG	si:dkey-276j7.3	7.5923e-143	0.542383	0.138	0.001	2.46902e-138	MG	si:dkey-276j7.3
ENSDARG00000097478~~qkia	0	1.6968	0.974	0.274	0	MG	qkia	0	1.39952	0.963	0.301	0	MG	qkia
ENSDARG00000097827~~lrp1aa	0	2.08091	0.988	0.198	0	MG	lrp1aa	0	2.2563	0.964	0.185	0	MG	lrp1aa
ENSDARG00000098005~~BX004996.1	1.51737e-148	0.945209	0.429	0.098	4.93449e-144	MG	BX004996.1	9.69212e-147	0.764735	0.351	0.065	3.15188e-142	MG	BX004996.1
ENSDARG00000098114~~ctsa	8.97492e-84	0.647101	0.25	0.055	2.91864e-79	MG	ctsa	8.43288e-95	0.600239	0.269	0.06	2.74237e-90	MG	ctsa
ENSDARG00000098123~~GNG12	1.29172e-95	0.704898	0.387	0.109	4.20068e-91	MG	GNG12	4.25187e-161	0.742966	0.34	0.052	1.38271e-156	MG	GNG12
ENSDARG00000098304~~taok1b	8.01955e-161	0.892269	0.548	0.138	2.60796e-156	MG	taok1b	4.71742e-214	0.898666	0.539	0.106	1.53411e-209	MG	taok1b
ENSDARG00000098308~~CR936540.1	0	2.29199	0.971	0.1	0	MG	CR936540.1	0	2.09906	0.935	0.072	0	MG	CR936540.1
ENSDARG00000098312~~scarb2a	0	1.88074	0.9	0.311	0	MG	scarb2a	0	1.8437	0.895	0.325	0	MG	scarb2a
ENSDARG00000098359~~il17rd	0	1.46154	0.552	0.027	0	MG	il17rd	2.32791e-302	1.04445	0.362	0.019	7.57037e-298	MG	il17rd
ENSDARG00000098374~~ENSDARG00000098374	1.78123e-89	0.699475	0.352	0.101	5.79257e-85	MG	ENSDARG00000098374	7.20505e-85	0.593886	0.376	0.119	2.34308e-80	MG	ENSDARG00000098374
ENSDARG00000098414~~ninl	0	1.28119	0.58	0.085	0	MG	ninl	0	1.22304	0.625	0.096	0	MG	ninl
ENSDARG00000098438~~slc6a6b	2.85749e-224	1.08343	0.72	0.179	9.29257e-220	MG	slc6a6b	3.15075e-292	1.06365	0.548	0.075	1.02462e-287	MG	slc6a6b
ENSDARG00000098451~~tlcd4a	1.96463e-102	0.695356	0.574	0.211	6.38899e-98	MG	tlcd4a	1.21276e-114	0.632548	0.479	0.143	3.94388e-110	MG	tlcd4a
ENSDARG00000098512~~si:ch73-215f7.1	7.02481e-288	1.21749	0.981	0.334	2.28447e-283	MG	si:ch73-215f7.1	1.33343e-216	0.944997	0.969	0.391	4.33632e-212	MG	si:ch73-215f7.1
ENSDARG00000098578~~pdgfab	0	1.06633	0.334	0.008	0	MG	pdgfab	0	1.07606	0.365	0.012	0	MG	pdgfab
ENSDARG00000098592~~zgc:92140	1.07813e-299	1.22175	0.7	0.148	3.50607e-295	MG	zgc:92140	3.32248e-198	0.916539	0.58	0.139	1.08047e-193	MG	zgc:92140
ENSDARG00000098641~~nbeal2	0	1.24069	0.463	0.034	0	MG	nbeal2	3.85876e-285	1.05954	0.4	0.033	1.25487e-280	MG	nbeal2
ENSDARG00000098644~~si:ch211-126j24.1	0	1.67912	0.992	0.333	0	MG	si:ch211-126j24.1	0	1.75638	0.971	0.253	0	MG	si:ch211-126j24.1
ENSDARG00000098733~~pxdn	3.17913e-291	1.18866	0.503	0.063	1.03385e-286	MG	pxdn	0	1.14712	0.532	0.066	0	MG	pxdn
ENSDARG00000098746~~dhrs13l1	0	1.53462	0.546	0.017	0	MG	dhrs13l1	0	1.16598	0.419	0.019	0	MG	dhrs13l1
ENSDARG00000098753~~elmo1	0	1.21398	0.971	0.471	0	MG	elmo1	0	1.32788	0.96	0.406	0	MG	elmo1
ENSDARG00000098802~~map7d1a	2.55937e-88	0.70506	0.407	0.139	8.32307e-84	MG	map7d1a	6.13534e-81	0.596954	0.418	0.152	1.99521e-76	MG	map7d1a
ENSDARG00000098817~~KCTD5	7.41476e-196	0.996736	0.506	0.105	2.41128e-191	MG	KCTD5	2.81654e-213	0.915806	0.568	0.12	9.15939e-209	MG	KCTD5
ENSDARG00000098826~~plcl2	1.45919e-148	0.89245	0.462	0.115	4.74528e-144	MG	plcl2	5.74183e-225	0.952083	0.555	0.111	1.86724e-220	MG	plcl2
ENSDARG00000099054~~BX088596.1	0	2.55005	0.891	0.017	0	MG	BX088596.1	0	1.5773	0.595	0.015	0	MG	BX088596.1
ENSDARG00000099137~~BX663503.3	0	1.51973	0.532	0.011	0	MG	BX663503.3	0	1.62891	0.584	0.012	0	MG	BX663503.3
ENSDARG00000099265~~slc7a5	1.71256e-85	0.604793	0.853	0.445	5.56923e-81	MG	slc7a5	7.12745e-111	0.61109	0.817	0.332	2.31785e-106	MG	slc7a5
ENSDARG00000099339~~pacsin3	2.02797e-179	0.915275	0.819	0.277	6.59495e-175	MG	pacsin3	3.01862e-297	1.03452	0.745	0.143	9.81656e-293	MG	pacsin3
ENSDARG00000099389~~cdo1	2.48359e-152	0.671168	0.178	0.006	8.07663e-148	MG	cdo1	2.3304e-293	0.979223	0.311	0.009	7.57845e-289	MG	cdo1
ENSDARG00000099411~~zgc:158343	5.20239e-82	0.564446	0.173	0.026	1.69182e-77	MG	zgc:158343	3.74784e-291	1.15816	0.504	0.068	1.2188e-286	MG	zgc:158343
ENSDARG00000099465~~rnf213a	1.81555e-180	0.942962	0.42	0.074	5.90416e-176	MG	rnf213a	1.7999e-188	1.03155	0.486	0.106	5.85327e-184	MG	rnf213a
ENSDARG00000099491~~tmem176l.1	3.06674e-305	1.29986	0.748	0.18	9.97304e-301	MG	tmem176l.1	0	1.41553	0.852	0.225	0	MG	tmem176l.1
ENSDARG00000099510~~cnn3a	0	1.1862	0.468	0.042	0	MG	cnn3a	8.80958e-301	1.07696	0.438	0.04	2.86487e-296	MG	cnn3a
ENSDARG00000099555~~foxo1a	5.39413e-186	0.970859	0.884	0.367	1.75417e-181	MG	foxo1a	2.09619e-129	0.823035	0.802	0.325	6.81682e-125	MG	foxo1a
ENSDARG00000099755~~pfklb	1.32113e-150	0.785709	0.268	0.03	4.29631e-146	MG	pfklb	2.74095e-126	0.618913	0.211	0.023	8.91357e-122	MG	pfklb
ENSDARG00000099776~~glula	0	3.73588	0.998	0.045	0	MG	glula	0	3.55969	0.994	0.16	0	MG	glula
ENSDARG00000099831~~BX005396.2	1.52158e-257	1.15379	0.434	0.051	4.94818e-253	MG	BX005396.2	0	1.4103	0.609	0.07	0	MG	BX005396.2
ENSDARG00000099841~~prkcab	5.43703e-186	0.918673	0.372	0.052	1.76812e-181	MG	prkcab	3.85448e-196	0.838647	0.346	0.043	1.25348e-191	MG	prkcab
ENSDARG00000099844~~GNAZ	1.31615e-185	0.940877	0.456	0.087	4.28013e-181	MG	GNAZ	7.72976e-102	0.625159	0.354	0.094	2.51372e-97	MG	GNAZ
ENSDARG00000099871~~myo7aa	0	1.32384	0.933	0.238	0	MG	myo7aa	0	1.63979	0.91	0.14	0	MG	myo7aa
ENSDARG00000099970~~CR383676.2	1.5507e-208	0.595599	1	1	5.04289e-204	MG	CR383676.2	0	0.762416	0.999	1	0	MG	CR383676.2
ENSDARG00000099979~~tgfbr3	1.0479e-300	0.998424	0.545	0.067	3.40776e-296	MG	tgfbr3	1.03501e-249	0.860106	0.468	0.064	3.36584e-245	MG	tgfbr3
ENSDARG00000100055~~tox2	0	1.5904	0.974	0.306	0	MG	tox2	2.55105e-182	0.888604	0.926	0.396	8.29603e-178	MG	tox2
ENSDARG00000100057~~ppfibp1b	1.02602e-303	1.24381	0.613	0.106	3.3366e-299	MG	ppfibp1b	0	1.38502	0.652	0.089	0	MG	ppfibp1b
ENSDARG00000100166~~si:dkeyp-9d4.3	0	1.44272	0.701	0.07	0	MG	si:dkeyp-9d4.3	0	1.36978	0.731	0.085	0	MG	si:dkeyp-9d4.3
ENSDARG00000100222~~utrn	0	1.42037	0.84	0.176	0	MG	utrn	0	1.16448	0.778	0.165	0	MG	utrn
ENSDARG00000100360~~si:ch211-125c23.3	1.00326e-131	0.542626	0.125	0	3.2626e-127	MG	si:ch211-125c23.3	0	1.321	0.279	0	0	MG	si:ch211-125c23.3
ENSDARG00000100606~~ARHGEF25	1.84093e-89	0.735306	0.382	0.124	5.98669e-85	MG	ARHGEF25	4.73078e-84	0.64118	0.374	0.126	1.53845e-79	MG	ARHGEF25
ENSDARG00000100693~~ddr2a	0	1.50361	0.611	0.037	0	MG	ddr2a	1.41684e-238	0.961517	0.366	0.037	4.60756e-234	MG	ddr2a
ENSDARG00000100709~~agxt2	8.564e-125	0.625268	0.183	0.014	2.78501e-120	MG	agxt2	5.72497e-148	0.656855	0.204	0.015	1.86176e-143	MG	agxt2
ENSDARG00000100729~~tln1	1.36091e-145	0.859312	0.672	0.237	4.42567e-141	MG	tln1	2.68721e-96	0.621124	0.616	0.238	8.73881e-92	MG	tln1
ENSDARG00000100731~~zgc:101540	1.32424e-82	0.667526	0.331	0.099	4.30643e-78	MG	zgc:101540	3.76608e-105	0.659058	0.332	0.082	1.22473e-100	MG	zgc:101540
ENSDARG00000100751~~SYNDIG1	5.21428e-159	0.839902	0.294	0.037	1.69568e-154	MG	SYNDIG1	2.41365e-144	0.70752	0.263	0.034	7.84918e-140	MG	SYNDIG1
ENSDARG00000100897~~pdgfrb	0	2.64211	0.99	0.089	0	MG	pdgfrb	0	2.64344	0.989	0.12	0	MG	pdgfrb
ENSDARG00000100913~~arhgef12b	8.67623e-96	0.671795	0.687	0.286	2.82151e-91	MG	arhgef12b	2.60822e-84	0.550586	0.699	0.295	8.48193e-80	MG	arhgef12b
ENSDARG00000101135~~si:dkey-85k7.7	0	1.28807	0.419	0.006	0	MG	si:dkey-85k7.7	1.91079e-300	1.00023	0.357	0.018	6.21389e-296	MG	si:dkey-85k7.7
ENSDARG00000101175~~mcu	4.35579e-61	0.607675	0.238	0.07	1.4165e-56	MG	mcu	1.82858e-70	0.509607	0.222	0.055	5.94655e-66	MG	mcu
ENSDARG00000101234~~nsmfb	9.29415e-125	0.680142	0.213	0.022	3.02246e-120	MG	nsmfb	1.13348e-112	0.508674	0.162	0.013	3.68607e-108	MG	nsmfb
ENSDARG00000101280~~vat1l	0	1.74064	0.751	0.07	0	MG	vat1l	0	1.50902	0.646	0.062	0	MG	vat1l
ENSDARG00000101443~~relch	0	1.35408	0.978	0.518	0	MG	relch	9.83274e-308	1.13483	0.975	0.46	3.19761e-303	MG	relch
ENSDARG00000101479~~BX908782.2	1.67184e-176	1.83652	0.188	0.004	5.43681e-172	MG	BX908782.2	1.5752e-179	2.46761	0.181	0.003	5.12255e-175	MG	BX908782.2
ENSDARG00000101584~~CU467822.2	0	2.35429	0.998	0.533	0	MG	CU467822.2	0	2.17804	0.993	0.539	0	MG	CU467822.2
ENSDARG00000101869~~MAGI3	2.36638e-281	1.36825	0.998	0.485	7.69548e-277	MG	MAGI3	1.06556e-148	0.575421	0.99	0.501	3.4652e-144	MG	MAGI3
ENSDARG00000101914~~metrnla	1.14678e-212	0.976335	0.358	0.04	3.72931e-208	MG	metrnla	1.4688e-194	0.86932	0.342	0.044	4.77655e-190	MG	metrnla
ENSDARG00000102024~~chmp6b	3.94294e-270	1.26069	0.881	0.294	1.28224e-265	MG	chmp6b	3.25654e-186	0.881544	0.829	0.282	1.05903e-181	MG	chmp6b
ENSDARG00000102082~~nr3c2	0	1.45841	0.994	0.513	0	MG	nr3c2	0	1.46639	0.983	0.41	0	MG	nr3c2
ENSDARG00000102142~~ece2b	1.24114e-263	1.3656	0.739	0.22	4.03618e-259	MG	ece2b	1.71529e-292	1.20854	0.781	0.202	5.57814e-288	MG	ece2b
ENSDARG00000102180~~shroom3	0	1.72511	0.922	0.157	0	MG	shroom3	0	1.36798	0.845	0.14	0	MG	shroom3
ENSDARG00000102424~~ARHGAP44	0	1.35144	0.582	0.058	0	MG	ARHGAP44	0	1.13694	0.524	0.062	0	MG	ARHGAP44
ENSDARG00000102453~~slc1a2b	0	3.66403	0.998	0.086	0	MG	slc1a2b	0	3.80452	0.993	0.107	0	MG	slc1a2b
ENSDARG00000102566~~fam102aa	0	1.69482	0.904	0.138	0	MG	fam102aa	0	1.92076	0.872	0.119	0	MG	fam102aa
ENSDARG00000102671~~dpyda.1	2.51708e-165	0.803735	0.253	0.022	8.18555e-161	MG	dpyda.1	6.09404e-139	0.696464	0.223	0.023	1.98178e-134	MG	dpyda.1
ENSDARG00000102742~~bmpr1bb	1.54735e-269	1.0721	0.32	0.014	5.03197e-265	MG	bmpr1bb	7.01298e-146	0.827702	0.253	0.031	2.28062e-141	MG	bmpr1bb
ENSDARG00000102829~~cobll1b	0	2.46991	0.963	0.058	0	MG	cobll1b	0	2.35044	0.938	0.063	0	MG	cobll1b
ENSDARG00000102855~~neo1a	0	1.36859	0.993	0.381	0	MG	neo1a	1.84074e-223	0.973022	0.979	0.477	5.98607e-219	MG	neo1a
ENSDARG00000102858~~sc:d189	6.94256e-126	0.557975	0.134	0.003	2.25772e-121	MG	sc:d189	6.42026e-289	0.927706	0.266	0.001	2.08787e-284	MG	sc:d189
ENSDARG00000103026~~p3h2	1.60795e-289	1.22319	0.738	0.161	5.22906e-285	MG	p3h2	3.83321e-212	0.94801	0.686	0.176	1.24656e-207	MG	p3h2
ENSDARG00000103109~~chl1b	2.04533e-198	0.698735	0.847	0.266	6.65142e-194	MG	chl1b	7.13041e-130	0.612577	0.746	0.262	2.31881e-125	MG	chl1b
ENSDARG00000103156~~gpc6a	3.82996e-288	1.1523	0.511	0.06	1.2455e-283	MG	gpc6a	2.27247e-102	0.643874	0.315	0.074	7.39006e-98	MG	gpc6a
ENSDARG00000103181~~si:dkey-34d22.1	0	1.65404	0.514	0.034	0	MG	si:dkey-34d22.1	0	1.68991	0.558	0.04	0	MG	si:dkey-34d22.1
ENSDARG00000103413~~zgc:109949	1.96918e-68	0.579501	0.492	0.201	6.40376e-64	MG	zgc:109949	1.14351e-133	0.720407	0.639	0.207	3.71871e-129	MG	zgc:109949
ENSDARG00000103494~~usp43a	5.24003e-214	0.792571	0.226	0.005	1.70406e-209	MG	usp43a	4.97756e-140	0.618788	0.195	0.015	1.6187e-135	MG	usp43a
ENSDARG00000103542~~vegfaa	9.78626e-118	0.817415	0.359	0.086	3.18249e-113	MG	vegfaa	4.76959e-247	1.36201	0.558	0.115	1.55107e-242	MG	vegfaa
ENSDARG00000103615~~si:dkey-31j3.11	2.09557e-256	1.17826	0.697	0.181	6.8148e-252	MG	si:dkey-31j3.11	1.42329e-270	1.09704	0.694	0.159	4.62854e-266	MG	si:dkey-31j3.11
ENSDARG00000103638~~CR936977.2	0	2.17363	0.903	0.044	0	MG	CR936977.2	0	2.02338	0.897	0.06	0	MG	CR936977.2
ENSDARG00000103648~~znf536	1.71992e-164	0.940689	0.998	0.659	5.59318e-160	MG	znf536	4.63475e-223	1.04692	0.993	0.607	1.50722e-218	MG	znf536
ENSDARG00000103699~~ptpn13	0	1.98482	0.997	0.464	0	MG	ptpn13	0	1.5216	0.994	0.491	0	MG	ptpn13
ENSDARG00000103747~~cav1	6.08944e-278	0.967152	0.29	0.006	1.98029e-273	MG	cav1	1.51856e-267	0.848739	0.266	0.005	4.93837e-263	MG	cav1
ENSDARG00000103800~~prkar1b	0	2.0212	0.986	0.211	0	MG	prkar1b	0	1.84437	0.954	0.179	0	MG	prkar1b
ENSDARG00000103823~~rbms1b	4.21611e-148	0.863244	0.478	0.118	1.37108e-143	MG	rbms1b	4.91098e-117	0.693947	0.376	0.095	1.59705e-112	MG	rbms1b
ENSDARG00000103830~~ddr2l	5.54007e-261	1.15542	0.573	0.106	1.80163e-256	MG	ddr2l	1.77313e-236	1.02607	0.562	0.111	5.76621e-232	MG	ddr2l
ENSDARG00000103937~~ndrg4	1.06766e-265	1.05248	0.885	0.23	3.47202e-261	MG	ndrg4	9.62745e-166	0.739104	0.828	0.276	3.13085e-161	MG	ndrg4
ENSDARG00000104039~~errfi1a	8.45671e-96	0.590603	0.176	0.021	2.75012e-91	MG	errfi1a	1.87698e-136	0.682665	0.219	0.023	6.10393e-132	MG	errfi1a
ENSDARG00000104068~~gstp1	0	1.54147	0.536	0.012	0	MG	gstp1	0	1.73633	0.678	0.03	0	MG	gstp1
ENSDARG00000104100~~bmpr1ba	0	2.16213	0.706	0.052	0	MG	bmpr1ba	9.9848e-284	1.38415	0.604	0.121	3.24706e-279	MG	bmpr1ba
ENSDARG00000104210~~si:ch73-173h19.3	7.35142e-172	0.820371	0.237	0.016	2.39068e-167	MG	si:ch73-173h19.3	8.59422e-125	0.518078	0.138	0.005	2.79484e-120	MG	si:ch73-173h19.3
ENSDARG00000104244~~twsg1a	2.42105e-133	0.780046	0.322	0.057	7.87325e-129	MG	twsg1a	9.34317e-108	0.588032	0.241	0.041	3.0384e-103	MG	twsg1a
ENSDARG00000104255~~arhgap27	0	1.7021	0.736	0.034	0	MG	arhgap27	0	1.48541	0.625	0.029	0	MG	arhgap27
ENSDARG00000104393~~npr2	1.499e-167	0.868132	0.322	0.041	4.87474e-163	MG	npr2	4.65537e-165	0.771806	0.316	0.043	1.51393e-160	MG	npr2
ENSDARG00000104396~~trim25	6.14768e-127	0.725294	0.226	0.026	1.99923e-122	MG	trim25	1.53167e-76	0.530547	0.226	0.052	4.98098e-72	MG	trim25
ENSDARG00000104470~~syngr2b	5.22147e-293	1.14256	0.405	0.031	1.69802e-288	MG	syngr2b	0	1.25311	0.49	0.033	0	MG	syngr2b
ENSDARG00000104491~~ampd2a	2.81644e-200	0.95434	0.336	0.037	9.15908e-196	MG	ampd2a	1.04296e-105	0.602076	0.218	0.033	3.39171e-101	MG	ampd2a
ENSDARG00000104555~~sh2d3cb	0	1.48617	0.624	0.057	0	MG	sh2d3cb	0	1.56693	0.73	0.06	0	MG	sh2d3cb
ENSDARG00000104568~~BX571715.1	8.85946e-159	0.897792	0.461	0.106	2.8811e-154	MG	BX571715.1	3.99326e-119	0.66027	0.405	0.103	1.29861e-114	MG	BX571715.1
ENSDARG00000104581~~tom1	1.56486e-49	0.505544	0.323	0.122	5.08892e-45	MG	tom1	3.26421e-104	0.604993	0.366	0.093	1.06152e-99	MG	tom1
ENSDARG00000104676~~prkd2	0	1.35212	0.755	0.138	0	MG	prkd2	0	1.50733	0.838	0.119	0	MG	prkd2
ENSDARG00000104845~~mipol1	3.08445e-215	1.07496	0.61	0.156	1.00306e-210	MG	mipol1	2.03656e-108	0.707388	0.476	0.154	6.6229e-104	MG	mipol1
ENSDARG00000104955~~BX294178.2	1.16888e-204	0.904382	0.31	0.027	3.80121e-200	MG	BX294178.2	2.38785e-220	0.843998	0.29	0.019	7.76528e-216	MG	BX294178.2
ENSDARG00000105045~~bmpr1ab	4.97446e-238	1.1197	0.669	0.172	1.61769e-233	MG	bmpr1ab	1.38859e-168	0.844269	0.535	0.134	4.51568e-164	MG	bmpr1ab
ENSDARG00000105071~~nos1apa	1.99789e-112	0.757592	0.783	0.416	6.49715e-108	MG	nos1apa	1.67356e-86	0.641854	0.826	0.399	5.44241e-82	MG	nos1apa
ENSDARG00000105088~~tenm4	0	2.42848	0.998	0.265	0	MG	tenm4	0	2.33345	0.993	0.311	0	MG	tenm4
ENSDARG00000105201~~adcyap1r1a	6.9748e-118	0.58142	0.128	0.003	2.2682e-113	MG	adcyap1r1a	1.25083e-127	0.576134	0.144	0.005	4.0677e-123	MG	adcyap1r1a
ENSDARG00000105209~~ENSDARG00000105209	4.63495e-266	1.13563	0.689	0.154	1.50729e-261	MG	ENSDARG00000105209	8.08308e-286	1.09411	0.665	0.133	2.62862e-281	MG	ENSDARG00000105209
ENSDARG00000105239~~ecm1b	7.07598e-301	1.13782	0.362	0.018	2.30111e-296	MG	ecm1b	7.36567e-178	0.776411	0.269	0.026	2.39531e-173	MG	ecm1b
ENSDARG00000105255~~zbtb4	3.04655e-65	0.583669	0.329	0.113	9.90737e-61	MG	zbtb4	1.24391e-115	0.684465	0.471	0.142	4.04518e-111	MG	zbtb4
ENSDARG00000105277~~cnksr3	5.49345e-117	0.766313	0.266	0.046	1.78647e-112	MG	cnksr3	8.74641e-124	0.664298	0.225	0.029	2.84433e-119	MG	cnksr3
ENSDARG00000105301~~sox8a	0	1.36273	0.646	0.108	0	MG	sox8a	0	1.24283	0.628	0.1	0	MG	sox8a
ENSDARG00000105368~~CR383676.3	1.39643e-116	0.731773	0.859	0.449	4.54119e-112	MG	CR383676.3	3.20304e-131	0.759268	0.921	0.461	1.04163e-126	MG	CR383676.3
ENSDARG00000105586~~BX255967.1	0	1.48394	0.603	0.053	0	MG	BX255967.1	0	1.43844	0.645	0.061	0	MG	BX255967.1
ENSDARG00000105592~~CR936442.1	0	1.85894	0.643	0.107	0	MG	CR936442.1	6.98405e-252	1.82143	0.535	0.096	2.27121e-247	MG	CR936442.1
ENSDARG00000106873~~LO018188.1	0	2.05069	0.891	0.056	0	MG	LO018188.1	0	2.0711	0.909	0.087	0	MG	LO018188.1
ENSDARG00000109527~~BX000363.2	9.30274e-245	1.08281	0.378	0.034	3.02525e-240	MG	BX000363.2	0	1.2281	0.479	0.039	0	MG	BX000363.2
ENSDARG00000109715~~sncgb	4.98083e-180	0.879431	0.282	0.026	1.61976e-175	MG	sncgb	3.06009e-105	0.612273	0.254	0.047	9.9514e-101	MG	sncgb
ENSDARG00000109820~~NPAS3	0	2.0272	0.996	0.303	0	MG	NPAS3	0	1.95492	0.988	0.273	0	MG	NPAS3
ENSDARG00000110160~~SBSPON	0	1.70841	0.641	0.022	0	MG	SBSPON	0	1.1553	0.391	0.014	0	MG	SBSPON
ENSDARG00000110878~~si:dkey-28k24.2	7.3154e-149	0.823402	0.282	0.036	2.37897e-144	MG	si:dkey-28k24.2	1.11783e-92	0.718938	0.173	0.024	3.6352e-88	MG	si:dkey-28k24.2
ENSDARG00000111261~~FO834850.1	4.225e-229	0.874559	0.26	0.009	1.37397e-224	MG	FO834850.1	1.07936e-236	0.848943	0.262	0.009	3.51009e-232	MG	FO834850.1
ENSDARG00000111612~~mapkapk3	1.11605e-177	0.928804	0.411	0.072	3.62939e-173	MG	mapkapk3	4.76102e-244	0.987494	0.448	0.063	1.54828e-239	MG	mapkapk3
ENSDARG00000112032~~HEPACAM	0	1.90998	0.904	0.096	0	MG	HEPACAM	0	1.80449	0.9	0.103	0	MG	HEPACAM
ENSDARG00000112454~~FO744833.2	6.23481e-100	0.543297	0.137	0.009	2.02756e-95	MG	FO744833.2	1.13216e-112	0.586581	0.214	0.029	3.68177e-108	MG	FO744833.2
ENSDARG00000112756~~CU468896.1	1.28836e-167	0.925427	0.376	0.066	4.18974e-163	MG	CU468896.1	0	1.30506	0.537	0.037	0	MG	CU468896.1
ENSDARG00000112977~~CABZ01061591.1	0	1.49471	0.721	0.084	0	MG	CABZ01061591.1	0	1.1577	0.545	0.063	0	MG	CABZ01061591.1
ENSDARG00000113774~~BX908388.3	1.05036e-79	0.533368	0.144	0.017	3.41578e-75	MG	BX908388.3	3.13893e-132	0.622129	0.188	0.015	1.02078e-127	MG	BX908388.3
ENSDARG00000114825~~SCARF2	1.83215e-172	0.949834	0.369	0.062	5.95814e-168	MG	SCARF2	1.56889e-216	0.983388	0.395	0.056	5.10204e-212	MG	SCARF2
ENSDARG00000115301~~lurap1	7.01204e-206	0.845964	0.247	0.01	2.28031e-201	MG	lurap1	2.13784e-162	0.662085	0.205	0.012	6.95225e-158	MG	lurap1
ENSDARG00000115646~~CR846082.1	1.17865e-198	1.01533	0.438	0.077	3.83295e-194	MG	CR846082.1	1.27219e-149	0.795365	0.396	0.083	4.13715e-145	MG	CR846082.1
ENSDARG00000115657~~prkcaa	1.15259e-82	0.555396	0.51	0.182	3.74824e-78	MG	prkcaa	7.94382e-194	0.821706	0.508	0.102	2.58333e-189	MG	prkcaa
ENSDARG00000116062~~ADAM12	0	1.74754	0.669	0.017	0	MG	ADAM12	0	1.40054	0.554	0.021	0	MG	ADAM12
ENSDARG00000116484~~BX465198.2	3.23884e-126	0.817111	0.31	0.058	1.05327e-121	MG	BX465198.2	1.87922e-129	0.772112	0.346	0.075	6.11122e-125	MG	BX465198.2
ENSDARG00000116863~~CU984579.1	3.62359e-74	0.575877	0.203	0.041	1.17839e-69	MG	CU984579.1	7.90289e-75	0.50749	0.2	0.042	2.57002e-70	MG	CU984579.1
ENSDARG00000117155~~BX323087.1	0	1.44775	0.512	0.009	0	MG	BX323087.1	0	1.22598	0.439	0.013	0	MG	BX323087.1
ENSDARG00000117275~~BX537310.2	4.45381e-144	0.544458	0.479	0.13	1.44838e-139	MG	BX537310.2	2.20383e-71	0.643935	0.296	0.094	7.16685e-67	MG	BX537310.2
ENSDARG00000117278~~CR854941.2	5.91367e-121	0.762726	0.378	0.085	1.92312e-116	MG	CR854941.2	7.95392e-153	0.717041	0.319	0.048	2.58661e-148	MG	CR854941.2
ENSDARG00000117425~~FO704721.3	4.76213e-142	0.656581	0.178	0.009	1.54864e-137	MG	FO704721.3	3.36789e-132	0.622459	0.175	0.012	1.09524e-127	MG	FO704721.3
ENSDARG00000117645~~CR384075.1	3.11256e-271	0.98022	0.301	0.01	1.0122e-266	MG	CR384075.1	3.58236e-239	0.787741	0.25	0.006	1.16498e-234	MG	CR384075.1
ENSDARG00000117777~~LO018400.1	5.71645e-256	1.28831	0.558	0.102	1.85899e-251	MG	LO018400.1	0	1.22211	0.531	0.064	0	MG	LO018400.1
ENSDARG00000000966~~ncor2	8.50757e-98	0.766571	0.973	0.652	2.76666e-93	ActivateMG	ncor2	2.70789e-96	0.730601	0.955	0.585	8.80607e-92	ActivateMG	ncor2
ENSDARG00000001634~~kirrel1a	2.365e-82	0.875268	0.785	0.299	7.69098e-78	ActivateMG	kirrel1a	3.98018e-59	0.700876	0.627	0.295	1.29435e-54	ActivateMG	kirrel1a
ENSDARG00000001776~~stim2b	4.26524e-108	1.00348	0.91	0.371	1.38706e-103	ActivateMG	stim2b	6.35967e-78	0.788505	0.745	0.317	2.06816e-73	ActivateMG	stim2b
ENSDARG00000001975~~hsd11b2	5.06024e-96	1.3894	0.637	0.185	1.64559e-91	ActivateMG	hsd11b2	2.52114e-115	1.28787	0.67	0.219	8.19873e-111	ActivateMG	hsd11b2
ENSDARG00000002026~~qkib	5.15868e-145	1.24523	0.902	0.275	1.6776e-140	ActivateMG	qkib	7.03462e-173	1.2124	0.859	0.279	2.28766e-168	ActivateMG	qkib
ENSDARG00000002131~~celf2	3.10437e-94	0.858197	0.988	0.88	1.00954e-89	ActivateMG	celf2	7.0664e-64	0.515681	0.996	0.906	2.29799e-59	ActivateMG	celf2
ENSDARG00000002197~~pygl	6.89869e-41	0.600037	0.376	0.123	2.24345e-36	ActivateMG	pygl	1.12514e-43	0.66318	0.384	0.152	3.65895e-39	ActivateMG	pygl
ENSDARG00000002494~~itgb6	2.7832e-62	1.01958	0.224	0.038	9.05098e-58	ActivateMG	itgb6	3.87104e-74	0.99577	0.306	0.073	1.25886e-69	ActivateMG	itgb6
ENSDARG00000002952~~smo	1.39955e-43	0.620676	0.385	0.128	4.55135e-39	ActivateMG	smo	8.15302e-35	0.581112	0.377	0.163	2.65136e-30	ActivateMG	smo
ENSDARG00000003142~~dachc	1.63773e-134	1.007	0.444	0.069	5.3259e-130	ActivateMG	dachc	2.53115e-102	0.902198	0.389	0.087	8.23131e-98	ActivateMG	dachc
ENSDARG00000003421~~igf2bp2a	2.94755e-45	0.564975	0.288	0.076	9.58543e-41	ActivateMG	igf2bp2a	6.39191e-34	0.559513	0.283	0.108	2.07865e-29	ActivateMG	igf2bp2a
ENSDARG00000003544~~adarb1b	4.70168e-116	1.11319	0.961	0.734	1.52899e-111	ActivateMG	adarb1b	6.53902e-121	0.895348	0.98	0.777	2.12649e-116	ActivateMG	adarb1b
ENSDARG00000003779~~ctnnd2b	3.13789e-181	1.58378	0.995	0.679	1.02044e-176	ActivateMG	ctnnd2b	1.2711e-191	1.29004	0.993	0.716	4.1336e-187	ActivateMG	ctnnd2b
ENSDARG00000004246~~slit2	1.38275e-171	1.35486	0.907	0.269	4.4967e-167	ActivateMG	slit2	8.13257e-145	1.12854	0.803	0.296	2.64471e-140	ActivateMG	slit2
ENSDARG00000004372~~fmnl3	4.07747e-66	0.780772	0.571	0.188	1.32599e-61	ActivateMG	fmnl3	8.3904e-62	0.757837	0.464	0.172	2.72856e-57	ActivateMG	fmnl3
ENSDARG00000004451~~tnfrsfa	5.56761e-83	0.932541	0.456	0.112	1.81059e-78	ActivateMG	tnfrsfa	1.64795e-55	0.712344	0.38	0.131	5.35914e-51	ActivateMG	tnfrsfa
ENSDARG00000004635~~epha7	5.59934e-34	0.524222	0.276	0.087	1.82091e-29	ActivateMG	epha7	3.12503e-26	0.50597	0.275	0.12	1.01626e-21	ActivateMG	epha7
ENSDARG00000005232~~ccdc85ca	5.10232e-56	0.606123	0.973	0.777	1.65927e-51	ActivateMG	ccdc85ca	8.84983e-47	0.521003	0.991	0.711	2.87797e-42	ActivateMG	ccdc85ca
ENSDARG00000005356~~tyro3	6.734e-61	0.896407	0.371	0.1	2.1899e-56	ActivateMG	tyro3	4.78636e-36	0.61274	0.295	0.112	1.55652e-31	ActivateMG	tyro3
ENSDARG00000005574~~vsx2	1.41995e-75	0.810691	0.478	0.13	4.61768e-71	ActivateMG	vsx2	2.58391e-87	0.908726	0.446	0.13	8.40286e-83	ActivateMG	vsx2
ENSDARG00000005679~~trip10a	1.27509e-43	0.587055	0.334	0.098	4.14658e-39	ActivateMG	trip10a	6.58219e-43	0.534206	0.246	0.071	2.14053e-38	ActivateMG	trip10a
ENSDARG00000006514~~her6	1.04228e-100	0.943295	0.546	0.135	3.38948e-96	ActivateMG	her6	1.57469e-68	0.855767	0.428	0.146	5.1209e-64	ActivateMG	her6
ENSDARG00000006601~~kaznb	5.42887e-151	1.35968	0.895	0.302	1.76547e-146	ActivateMG	kaznb	1.00185e-106	1.01481	0.803	0.332	3.25803e-102	ActivateMG	kaznb
ENSDARG00000006899~~far1	8.72705e-151	1.19651	0.712	0.177	2.83804e-146	ActivateMG	far1	6.09025e-77	0.871833	0.502	0.176	1.98055e-72	ActivateMG	far1
ENSDARG00000006921~~lrp5	3.44349e-105	1.03177	0.766	0.252	1.11982e-100	ActivateMG	lrp5	7.25159e-86	0.882418	0.616	0.237	2.35822e-81	ActivateMG	lrp5
ENSDARG00000007369~~tcf7l1b	1.28765e-138	1.17741	0.739	0.194	4.18742e-134	ActivateMG	tcf7l1b	4.52089e-84	0.859121	0.52	0.171	1.47019e-79	ActivateMG	tcf7l1b
ENSDARG00000007370~~dysf	5.62771e-110	1.17749	0.646	0.196	1.83013e-105	ActivateMG	dysf	8.51232e-79	0.869352	0.574	0.222	2.76821e-74	ActivateMG	dysf
ENSDARG00000007461~~srgap1a	1.19941e-51	0.682013	0.663	0.271	3.90047e-47	ActivateMG	srgap1a	6.35131e-40	0.605094	0.509	0.253	2.06545e-35	ActivateMG	srgap1a
ENSDARG00000007678~~ttyh3b	1.15819e-35	0.599437	0.851	0.618	3.76642e-31	ActivateMG	ttyh3b	6.23413e-64	0.776933	0.909	0.619	2.02734e-59	ActivateMG	ttyh3b
ENSDARG00000007697~~fabp7a	2.41123e-55	1.20792	0.624	0.299	7.84134e-51	ActivateMG	fabp7a	3.10631e-118	1.29856	0.918	0.614	1.01017e-113	ActivateMG	fabp7a
ENSDARG00000007723~~efnb1	3.38622e-151	1.45853	0.98	0.539	1.1012e-146	ActivateMG	efnb1	7.02612e-140	1.11013	0.975	0.543	2.28489e-135	ActivateMG	efnb1
ENSDARG00000007836~~ctsla	1.65423e-84	1.09679	0.688	0.255	5.37957e-80	ActivateMG	ctsla	1.1742e-85	0.832302	0.837	0.432	3.81851e-81	ActivateMG	ctsla
ENSDARG00000008026~~niban2b	2.32626e-101	1.06424	0.48	0.114	7.56501e-97	ActivateMG	niban2b	3.66331e-47	0.705954	0.31	0.106	1.19131e-42	ActivateMG	niban2b
ENSDARG00000008247~~vezf1a	1.09077e-63	0.795091	0.929	0.5	3.54719e-59	ActivateMG	vezf1a	3.44232e-51	0.666885	0.864	0.513	1.11944e-46	ActivateMG	vezf1a
ENSDARG00000008388~~mmp14b	2.72352e-73	0.809136	0.385	0.092	8.85688e-69	ActivateMG	mmp14b	1.98113e-152	1.14412	0.625	0.16	6.44263e-148	ActivateMG	mmp14b
ENSDARG00000009018~~rhbg	1.14179e-116	1.09805	0.8	0.232	3.7131e-112	ActivateMG	rhbg	6.44226e-116	0.983728	0.83	0.274	2.09502e-111	ActivateMG	rhbg
ENSDARG00000009677~~dlg1	7.54585e-83	0.854202	0.89	0.368	2.45391e-78	ActivateMG	dlg1	9.25769e-57	0.626562	0.815	0.416	3.0106e-52	ActivateMG	dlg1
ENSDARG00000009693~~llgl1	6.71507e-158	1.36291	1	0.427	2.18374e-153	ActivateMG	llgl1	6.70331e-142	1.04895	0.995	0.484	2.17992e-137	ActivateMG	llgl1
ENSDARG00000009899~~znf385a	1.08142e-121	1.26788	0.895	0.343	3.51679e-117	ActivateMG	znf385a	1.34387e-109	0.936034	0.862	0.332	4.37027e-105	ActivateMG	znf385a
ENSDARG00000010018~~qki2	1.13753e-164	1.28401	0.932	0.283	3.69924e-160	ActivateMG	qki2	4.14237e-167	1.18075	0.841	0.293	1.3471e-162	ActivateMG	qki2
ENSDARG00000010132~~dacha	8.88425e-63	0.819801	0.888	0.423	2.88916e-58	ActivateMG	dacha	4.95009e-71	0.787126	0.868	0.406	1.60977e-66	ActivateMG	dacha
ENSDARG00000010207~~smad3b	8.05638e-60	0.717178	0.641	0.234	2.61993e-55	ActivateMG	smad3b	1.28922e-40	0.598481	0.457	0.199	4.19254e-36	ActivateMG	smad3b
ENSDARG00000011163~~sema3fa	5.96488e-188	1.57907	0.961	0.323	1.93978e-183	ActivateMG	sema3fa	6.01726e-129	0.98656	0.895	0.313	1.95681e-124	ActivateMG	sema3fa
ENSDARG00000011190~~fgfr1b	1.29948e-158	1.19618	0.815	0.212	4.22591e-154	ActivateMG	fgfr1b	7.17784e-125	1.07641	0.618	0.197	2.33423e-120	ActivateMG	fgfr1b
ENSDARG00000011533~~sema6dl	2.80435e-85	0.945968	0.698	0.245	9.11974e-81	ActivateMG	sema6dl	7.83402e-104	0.917502	0.757	0.31	2.54762e-99	ActivateMG	sema6dl
ENSDARG00000011600~~epha4b	1.25337e-49	0.759451	0.715	0.344	4.07596e-45	ActivateMG	epha4b	1.85964e-89	0.892105	0.69	0.28	6.04755e-85	ActivateMG	epha4b
ENSDARG00000011821~~plod2	3.54152e-135	1.11089	0.578	0.122	1.1517e-130	ActivateMG	plod2	2.83823e-62	0.749116	0.4	0.131	9.22993e-58	ActivateMG	plod2
ENSDARG00000011876~~ednraa	2.95143e-66	0.79179	0.4	0.101	9.59806e-62	ActivateMG	ednraa	2.57581e-36	0.60396	0.29	0.106	8.37653e-32	ActivateMG	ednraa
ENSDARG00000012066~~dcn	8.64228e-108	0.999889	0.439	0.085	2.81047e-103	ActivateMG	dcn	3.01131e-152	1.11953	0.522	0.11	9.79278e-148	ActivateMG	dcn
ENSDARG00000012450~~vmp1	4.18205e-117	1.9606	0.793	0.332	1.36e-112	ActivateMG	vmp1	7.16462e-122	1.83089	0.768	0.347	2.32993e-117	ActivateMG	vmp1
ENSDARG00000012593~~col5a1	8.9904e-99	0.918864	0.561	0.142	2.92368e-94	ActivateMG	col5a1	3.31368e-113	0.986311	0.5	0.133	1.07761e-108	ActivateMG	col5a1
ENSDARG00000012684~~atp2b1a	5.3188e-24	0.57509	0.602	0.319	1.72967e-19	ActivateMG	atp2b1a	1.05068e-33	0.705778	0.63	0.372	3.41682e-29	ActivateMG	atp2b1a
ENSDARG00000012833~~foxn3	1.62626e-128	1.20147	0.854	0.307	5.2886e-124	ActivateMG	foxn3	2.51691e-109	0.916065	0.77	0.31	8.18498e-105	ActivateMG	foxn3
ENSDARG00000012914~~arhgef4	1.74363e-202	1.96631	0.956	0.375	5.67029e-198	ActivateMG	arhgef4	1.84822e-233	1.71306	0.935	0.381	6.01042e-229	ActivateMG	arhgef4
ENSDARG00000012942~~itgb5	1.27038e-47	0.62963	0.71	0.282	4.13127e-43	ActivateMG	itgb5	1.29342e-44	0.545477	0.654	0.278	4.20621e-40	ActivateMG	itgb5
ENSDARG00000013005~~opcml	1.9852e-104	1.14974	0.851	0.386	6.45586e-100	ActivateMG	opcml	5.35725e-120	1.0118	0.906	0.425	1.74218e-115	ActivateMG	opcml
ENSDARG00000013144~~atp1b1a	6.5257e-86	0.991487	0.405	0.09	2.12216e-81	ActivateMG	atp1b1a	6.07666e-71	0.780305	0.328	0.085	1.97613e-66	ActivateMG	atp1b1a
ENSDARG00000013575~~rfx2	3.58342e-152	1.11629	0.61	0.12	1.16533e-147	ActivateMG	rfx2	1.38059e-82	0.792328	0.379	0.096	4.48968e-78	ActivateMG	rfx2
ENSDARG00000014302~~brinp2	5.23723e-43	0.663986	0.583	0.245	1.70315e-38	ActivateMG	brinp2	3.68168e-36	0.63612	0.587	0.33	1.19728e-31	ActivateMG	brinp2
ENSDARG00000014378~~slc12a4	9.05454e-196	1.3764	0.854	0.2	2.94453e-191	ActivateMG	slc12a4	4.47255e-125	1.04936	0.659	0.219	1.45447e-120	ActivateMG	slc12a4
ENSDARG00000014804~~cacna2d1a	5.79422e-45	0.910175	0.405	0.147	1.88428e-40	ActivateMG	cacna2d1a	5.21545e-61	0.909578	0.473	0.194	1.69606e-56	ActivateMG	cacna2d1a
ENSDARG00000014907~~htra1b	2.7701e-89	1.1571	0.42	0.098	9.00835e-85	ActivateMG	htra1b	2.16879e-128	1.36062	0.415	0.085	7.0529e-124	ActivateMG	htra1b
ENSDARG00000014939~~kcnn2	7.82877e-76	0.78665	0.337	0.07	2.54592e-71	ActivateMG	kcnn2	4.39521e-64	0.692198	0.304	0.079	1.42932e-59	ActivateMG	kcnn2
ENSDARG00000015002~~cdh4	8.56771e-165	1.74283	0.92	0.337	2.78622e-160	ActivateMG	cdh4	1.03578e-118	1.14261	0.9	0.378	3.36835e-114	ActivateMG	cdh4
ENSDARG00000015015~~tspan18b	9.59491e-30	0.57752	0.32	0.118	3.12027e-25	ActivateMG	tspan18b	1.73952e-28	0.547347	0.332	0.147	5.65693e-24	ActivateMG	tspan18b
ENSDARG00000015176~~ror1	1.05765e-151	1.2452	0.961	0.26	3.43948e-147	ActivateMG	ror1	4.59735e-141	1.07988	0.937	0.304	1.49506e-136	ActivateMG	ror1
ENSDARG00000015472~~gpc4	2.58138e-57	0.700524	0.407	0.117	8.39465e-53	ActivateMG	gpc4	2.00917e-57	0.751482	0.353	0.113	6.53383e-53	ActivateMG	gpc4
ENSDARG00000015557~~zgc:100829	3.08209e-77	0.783907	0.434	0.107	1.0023e-72	ActivateMG	zgc:100829	6.10332e-59	0.687922	0.292	0.077	1.9848e-54	ActivateMG	zgc:100829
ENSDARG00000015805~~cgnl1	2.63156e-118	1.14416	0.673	0.188	8.55783e-114	ActivateMG	cgnl1	7.27044e-74	0.805445	0.545	0.199	2.36435e-69	ActivateMG	cgnl1
ENSDARG00000015822~~sesn3	5.02466e-43	0.589897	0.317	0.091	1.63402e-38	ActivateMG	sesn3	6.24849e-56	0.746295	0.402	0.147	2.03201e-51	ActivateMG	sesn3
ENSDARG00000016132~~keap1a	2.71785e-99	0.708353	0.263	0.032	8.83846e-95	ActivateMG	keap1a	1.36498e-52	0.574255	0.199	0.042	4.43892e-48	ActivateMG	keap1a
ENSDARG00000016153~~dag1	3.12074e-114	0.934069	0.98	0.499	1.01486e-109	ActivateMG	dag1	2.8667e-110	0.818851	0.964	0.521	9.32252e-106	ActivateMG	dag1
ENSDARG00000016154~~zfp36l1a	8.42298e-85	0.832968	0.415	0.094	2.73915e-80	ActivateMG	zfp36l1a	9.93786e-74	0.793498	0.339	0.088	3.23179e-69	ActivateMG	zfp36l1a
ENSDARG00000016188~~SBNO2	1.46616e-24	0.522997	0.541	0.28	4.76795e-20	ActivateMG	SBNO2	1.09373e-32	0.51802	0.435	0.21	3.5568e-28	ActivateMG	SBNO2
ENSDARG00000016404~~ptch1	3.55951e-51	0.677611	0.783	0.336	1.15755e-46	ActivateMG	ptch1	4.96288e-38	0.587877	0.578	0.292	1.61393e-33	ActivateMG	ptch1
ENSDARG00000016749~~slco1c1	3.27777e-127	1.06553	0.68	0.17	1.06593e-122	ActivateMG	slco1c1	1.08427e-67	0.81887	0.487	0.185	3.52604e-63	ActivateMG	slco1c1
ENSDARG00000016999~~lin28a	1.35513e-55	2.0536	0.329	0.087	4.4069e-51	ActivateMG	lin28a	3.33626e-72	1.41365	0.341	0.089	1.08495e-67	ActivateMG	lin28a
ENSDARG00000017107~~nr2e1	2.53812e-146	1.13501	0.556	0.104	8.25396e-142	ActivateMG	nr2e1	4.44228e-92	0.964003	0.389	0.098	1.44463e-87	ActivateMG	nr2e1
ENSDARG00000017180~~npc1	3.39313e-54	0.739876	0.534	0.191	1.10345e-49	ActivateMG	npc1	2.63301e-79	0.843529	0.549	0.185	8.56253e-75	ActivateMG	npc1
ENSDARG00000017211~~plxnb1b	7.91995e-188	1.42458	0.998	0.39	2.57557e-183	ActivateMG	plxnb1b	1.59774e-225	1.35055	0.993	0.411	5.19586e-221	ActivateMG	plxnb1b
ENSDARG00000017591~~fat1a	3.04135e-59	0.736802	0.907	0.4	9.89047e-55	ActivateMG	fat1a	5.77326e-71	0.724235	0.821	0.424	1.87746e-66	ActivateMG	fat1a
ENSDARG00000017676~~mmp2	1.37708e-87	0.935561	0.432	0.1	4.47827e-83	ActivateMG	mmp2	4.92863e-67	0.796329	0.424	0.137	1.60279e-62	ActivateMG	mmp2
ENSDARG00000017785~~zgc:158689	5.28956e-54	0.720982	0.417	0.13	1.72016e-49	ActivateMG	zgc:158689	2.02325e-23	0.51211	0.324	0.16	6.57961e-19	ActivateMG	zgc:158689
ENSDARG00000018174~~gnai2a	2.50099e-155	1.34475	0.995	0.418	8.13323e-151	ActivateMG	gnai2a	5.32951e-131	1.09818	0.978	0.501	1.73316e-126	ActivateMG	gnai2a
ENSDARG00000018399~~rps6kb1a	7.60064e-33	0.660194	0.505	0.227	2.47173e-28	ActivateMG	rps6kb1a	2.05692e-39	0.639478	0.424	0.181	6.6891e-35	ActivateMG	rps6kb1a
ENSDARG00000018693~~cdh2	9.36973e-169	1.1139	1	0.949	3.04704e-164	ActivateMG	cdh2	2.79637e-203	0.949886	1	0.963	9.09379e-199	ActivateMG	cdh2
ENSDARG00000019098~~cd82a	1.22283e-203	1.53269	0.937	0.304	3.97665e-199	ActivateMG	cd82a	6.32392e-207	1.32188	0.937	0.349	2.05654e-202	ActivateMG	cd82a
ENSDARG00000019353~~sparc	4.04071e-64	0.777051	0.551	0.176	1.31404e-59	ActivateMG	sparc	4.31771e-119	0.986124	0.685	0.2	1.40412e-114	ActivateMG	sparc
ENSDARG00000019753~~kcnn3	5.28247e-117	1.10082	0.612	0.158	1.71786e-112	ActivateMG	kcnn3	6.84965e-71	0.836087	0.518	0.201	2.22751e-66	ActivateMG	kcnn3
ENSDARG00000020009~~bmp2k	2.2567e-52	0.541416	0.92	0.434	7.33878e-48	ActivateMG	bmp2k	1.03821e-58	0.644451	0.904	0.439	3.37627e-54	ActivateMG	bmp2k
ENSDARG00000020134~~sipa1l1	5.18577e-186	1.36391	0.959	0.335	1.68641e-181	ActivateMG	sipa1l1	2.20874e-169	1.15914	0.866	0.329	7.18281e-165	ActivateMG	sipa1l1
ENSDARG00000020235~~sept9a	2.90067e-62	0.501497	0.168	0.02	9.43299e-58	ActivateMG	sept9a	2.23699e-82	0.568971	0.178	0.02	7.2747e-78	ActivateMG	sept9a
ENSDARG00000020708~~mdkb	5.54338e-38	0.645132	0.539	0.238	1.80271e-33	ActivateMG	mdkb	5.57559e-84	0.88336	0.708	0.303	1.81318e-79	ActivateMG	mdkb
ENSDARG00000020759~~elf1	3.77367e-41	0.664081	0.395	0.138	1.2272e-36	ActivateMG	elf1	1.90472e-45	0.64568	0.339	0.121	6.19416e-41	ActivateMG	elf1
ENSDARG00000020871~~ptprz1b	7.83936e-127	1.28193	0.659	0.177	2.54936e-122	ActivateMG	ptprz1b	2.05922e-54	0.753527	0.467	0.186	6.69658e-50	ActivateMG	ptprz1b
ENSDARG00000021241~~zgc:165604	5.44446e-138	1.15247	0.849	0.224	1.77054e-133	ActivateMG	zgc:165604	5.97372e-135	1.04552	0.788	0.243	1.94266e-130	ActivateMG	zgc:165604
ENSDARG00000021539~~ephb2b	6.70312e-93	0.856337	0.998	0.802	2.17985e-88	ActivateMG	ephb2b	5.58996e-177	1.05836	1	0.842	1.81785e-172	ActivateMG	ephb2b
ENSDARG00000021607~~negr1	3.45427e-80	0.883928	0.973	0.508	1.12333e-75	ActivateMG	negr1	2.27949e-49	0.574539	0.944	0.577	7.41289e-45	ActivateMG	negr1
ENSDARG00000021833~~ahr2	5.46469e-64	0.789845	0.561	0.188	1.77712e-59	ActivateMG	ahr2	3.94167e-41	0.633053	0.42	0.18	1.28183e-36	ActivateMG	ahr2
ENSDARG00000021896~~asap3	3.05908e-205	1.25116	0.644	0.103	9.94812e-201	ActivateMG	asap3	5.39965e-97	0.930958	0.415	0.105	1.75597e-92	ActivateMG	asap3
ENSDARG00000022085~~si:dkey-34e4.1	7.804e-94	0.932889	0.795	0.283	2.53786e-89	ActivateMG	si:dkey-34e4.1	9.08577e-63	0.732545	0.638	0.296	2.95469e-58	ActivateMG	si:dkey-34e4.1
ENSDARG00000022254~~prkcbb	1.15788e-77	0.854738	0.422	0.105	3.76544e-73	ActivateMG	prkcbb	4.28021e-35	0.548456	0.259	0.09	1.39192e-30	ActivateMG	prkcbb
ENSDARG00000022712~~stat3	1.42114e-55	0.698565	0.91	0.526	4.62154e-51	ActivateMG	stat3	5.98517e-44	0.571282	0.792	0.471	1.94638e-39	ActivateMG	stat3
ENSDARG00000023053~~niban1b	6.09441e-138	0.878484	0.329	0.035	1.9819e-133	ActivateMG	niban1b	1.39734e-79	0.656695	0.236	0.039	4.54416e-75	ActivateMG	niban1b
ENSDARG00000023443~~tjp2b	1.23862e-177	1.66611	0.993	0.551	4.02799e-173	ActivateMG	tjp2b	3.95365e-241	1.59223	0.995	0.451	1.28573e-236	ActivateMG	tjp2b
ENSDARG00000023578~~lpp	4.60491e-116	1.04769	0.939	0.358	1.49752e-111	ActivateMG	lpp	1.49389e-165	1.14016	0.915	0.347	4.85813e-161	ActivateMG	lpp
ENSDARG00000024276~~pcbp4	1.07277e-87	0.895999	1	0.613	3.48864e-83	ActivateMG	pcbp4	2.62403e-83	0.721845	0.998	0.664	8.53335e-79	ActivateMG	pcbp4
ENSDARG00000024365~~crlf1a	7.48809e-265	2.70696	0.78	0.133	2.43513e-260	ActivateMG	crlf1a	5.30881e-217	2.34806	0.692	0.166	1.72643e-212	ActivateMG	crlf1a
ENSDARG00000024537~~emilin1a	1.37585e-73	0.83832	0.478	0.131	4.47425e-69	ActivateMG	emilin1a	8.08753e-64	0.822147	0.442	0.163	2.63007e-59	ActivateMG	emilin1a
ENSDARG00000024964~~patj	1.12756e-73	0.804438	0.839	0.314	3.66682e-69	ActivateMG	patj	1.47291e-59	0.698421	0.728	0.337	4.78989e-55	ActivateMG	patj
ENSDARG00000025147~~cd63	3.28936e-49	0.718927	0.422	0.14	1.0697e-44	ActivateMG	cd63	5.87466e-70	0.798648	0.578	0.23	1.91044e-65	ActivateMG	cd63
ENSDARG00000025301~~gfap	7.08518e-182	1.21225	0.646	0.112	2.3041e-177	ActivateMG	gfap	1.12691e-113	1.06365	0.607	0.192	3.66472e-109	ActivateMG	gfap
ENSDARG00000025420~~fzd5	4.17051e-99	0.94641	0.476	0.108	1.35625e-94	ActivateMG	fzd5	9.43759e-68	0.790249	0.292	0.072	3.0691e-63	ActivateMG	fzd5
ENSDARG00000025522~~sgk1	5.35397e-134	1.48574	0.493	0.094	1.74111e-129	ActivateMG	sgk1	2.65169e-109	1.18653	0.46	0.124	8.62329e-105	ActivateMG	sgk1
ENSDARG00000025641~~gli2a	1.49419e-128	1.29644	0.998	0.36	4.85911e-124	ActivateMG	gli2a	3.21714e-183	1.33344	0.982	0.407	1.04621e-178	ActivateMG	gli2a
ENSDARG00000025826~~gna12a	4.93605e-137	1.18217	0.624	0.141	1.6052e-132	ActivateMG	gna12a	3.20269e-70	0.849409	0.424	0.143	1.04151e-65	ActivateMG	gna12a
ENSDARG00000026499~~ppm1e	2.03717e-25	0.520347	0.768	0.479	6.62487e-21	ActivateMG	ppm1e	1.7692e-48	0.828701	0.587	0.304	5.75343e-44	ActivateMG	ppm1e
ENSDARG00000027065~~slc38a3a	1.98337e-82	0.889167	0.949	0.449	6.4499e-78	ActivateMG	slc38a3a	3.42557e-61	0.603326	0.933	0.495	1.114e-56	ActivateMG	slc38a3a
ENSDARG00000027087~~tgfb2	3.5948e-102	1.16176	0.483	0.113	1.16903e-97	ActivateMG	tgfb2	6.86253e-69	0.955113	0.339	0.096	2.23169e-64	ActivateMG	tgfb2
ENSDARG00000027500~~oxsr1b	1.60426e-62	0.792613	0.639	0.237	5.21704e-58	ActivateMG	oxsr1b	1.10426e-70	0.747896	0.536	0.194	3.59104e-66	ActivateMG	oxsr1b
ENSDARG00000027552~~mapk1	4.55711e-137	1.36499	0.888	0.346	1.48197e-132	ActivateMG	mapk1	2.33166e-80	0.852995	0.71	0.341	7.58257e-76	ActivateMG	mapk1
ENSDARG00000027797~~adcy6b	3.31955e-71	0.791409	0.541	0.161	1.07952e-66	ActivateMG	adcy6b	3.96186e-66	0.788091	0.429	0.146	1.2884e-61	ActivateMG	adcy6b
ENSDARG00000028099~~sh2d3ca	7.1581e-166	1.21042	0.734	0.162	2.32781e-161	ActivateMG	sh2d3ca	7.43504e-101	0.934862	0.547	0.167	2.41787e-96	ActivateMG	sh2d3ca
ENSDARG00000028159~~tead1a	5.72394e-101	1.07459	0.949	0.419	1.86143e-96	ActivateMG	tead1a	5.06966e-118	1.03421	0.868	0.374	1.64865e-113	ActivateMG	tead1a
ENSDARG00000029045~~peli2	1.05118e-39	0.602938	0.59	0.25	3.41845e-35	ActivateMG	peli2	3.66866e-36	0.537155	0.587	0.293	1.19305e-31	ActivateMG	peli2
ENSDARG00000029146~~lrp1ab	2.48572e-143	1.26068	0.985	0.455	8.08355e-139	ActivateMG	lrp1ab	6.59735e-81	0.754719	0.931	0.479	2.14546e-76	ActivateMG	lrp1ab
ENSDARG00000029296~~nexmifb	3.60488e-170	1.92797	0.983	0.449	1.17231e-165	ActivateMG	nexmifb	6.23841e-180	1.61178	0.96	0.502	2.02873e-175	ActivateMG	nexmifb
ENSDARG00000030058~~tbx4	4.05398e-157	1.20979	0.741	0.18	1.31835e-152	ActivateMG	tbx4	2.4268e-36	0.6189	0.366	0.157	7.89195e-32	ActivateMG	tbx4
ENSDARG00000030297~~sox13	2.67039e-204	1.46439	0.88	0.231	8.6841e-200	ActivateMG	sox13	6.0479e-172	1.19561	0.743	0.231	1.96678e-167	ActivateMG	sox13
ENSDARG00000030364~~angpt1	5.66241e-181	1.31737	0.815	0.187	1.84142e-176	ActivateMG	angpt1	1.82056e-102	0.971389	0.607	0.199	5.92046e-98	ActivateMG	angpt1
ENSDARG00000030633~~plekhm3	7.35338e-68	0.819408	0.693	0.264	2.39132e-63	ActivateMG	plekhm3	1.75742e-33	0.547218	0.442	0.209	5.71513e-29	ActivateMG	plekhm3
ENSDARG00000030999~~mybl1	1.14951e-55	0.619439	0.602	0.206	3.7382e-51	ActivateMG	mybl1	3.27011e-38	0.538357	0.514	0.235	1.06344e-33	ActivateMG	mybl1
ENSDARG00000031222~~lhx2b	1.01799e-68	0.835194	0.544	0.171	3.31051e-64	ActivateMG	lhx2b	3.47302e-30	0.594115	0.348	0.16	1.12943e-25	ActivateMG	lhx2b
ENSDARG00000031228~~podxl	3.07244e-33	0.513505	0.224	0.063	9.99157e-29	ActivateMG	podxl	2.89903e-56	0.55758	0.187	0.035	9.42765e-52	ActivateMG	podxl
ENSDARG00000031317~~ppdpfb	8.58586e-62	0.771256	0.459	0.137	2.79212e-57	ActivateMG	ppdpfb	1.09742e-60	0.76025	0.56	0.238	3.5688e-56	ActivateMG	ppdpfb
ENSDARG00000031548~~ephb3a	5.07251e-35	0.590246	0.52	0.222	1.64958e-30	ActivateMG	ephb3a	4.78325e-58	0.762985	0.538	0.235	1.55551e-53	ActivateMG	ephb3a
ENSDARG00000032049~~enah	1.48999e-81	0.894889	0.893	0.374	4.84546e-77	ActivateMG	enah	8.17671e-72	0.728734	0.784	0.386	2.65907e-67	ActivateMG	enah
ENSDARG00000032317~~tox	1.1203e-122	1.15278	0.973	0.435	3.64323e-118	ActivateMG	tox	5.35847e-145	1.06207	0.957	0.472	1.74257e-140	ActivateMG	tox
ENSDARG00000032963~~her12	1.41843e-95	0.793367	0.29	0.041	4.61273e-91	ActivateMG	her12	1.34823e-57	0.741081	0.225	0.051	4.38444e-53	ActivateMG	her12
ENSDARG00000033498~~rorb	4.46789e-127	1.54122	0.946	0.479	1.45296e-122	ActivateMG	rorb	8.53841e-113	1.16125	0.928	0.492	2.77669e-108	ActivateMG	rorb
ENSDARG00000033840~~fat3a	2.42869e-63	0.628568	0.72	0.266	7.89811e-59	ActivateMG	fat3a	8.53516e-94	0.764068	0.761	0.313	2.77564e-89	ActivateMG	fat3a
ENSDARG00000033999~~cyp26a1	3.72052e-61	1.03844	0.466	0.147	1.20991e-56	ActivateMG	cyp26a1	5.89382e-101	1.35374	0.543	0.171	1.91667e-96	ActivateMG	cyp26a1
ENSDARG00000034117~~rarga	2.86187e-74	0.815274	0.598	0.189	9.3068e-70	ActivateMG	rarga	1.14486e-34	0.595364	0.375	0.166	3.72308e-30	ActivateMG	rarga
ENSDARG00000034434~~igf1rb	1.57277e-66	0.754919	0.951	0.586	5.11466e-62	ActivateMG	igf1rb	6.27585e-34	0.551516	0.748	0.5	2.04091e-29	ActivateMG	igf1rb
ENSDARG00000034555~~pard3bb	1.70676e-124	1.20188	0.954	0.466	5.55037e-120	ActivateMG	pard3bb	1.53759e-164	1.18684	0.967	0.409	5.00023e-160	ActivateMG	pard3bb
ENSDARG00000034718~~tfpia	5.35444e-86	0.760364	0.312	0.053	1.74126e-81	ActivateMG	tfpia	3.95646e-42	0.571619	0.232	0.067	1.28664e-37	ActivateMG	tfpia
ENSDARG00000034785~~dachb	3.20163e-35	0.76379	0.449	0.193	1.04117e-30	ActivateMG	dachb	2.55289e-24	0.617951	0.411	0.235	8.30198e-20	ActivateMG	dachb
ENSDARG00000034871~~mid2	3.07778e-184	1.54152	0.954	0.332	1.0009e-179	ActivateMG	mid2	1.29955e-240	1.50013	0.958	0.373	4.22613e-236	ActivateMG	mid2
ENSDARG00000035132~~rgs3b	4.37265e-28	0.515208	0.356	0.14	1.42199e-23	ActivateMG	rgs3b	9.91486e-24	0.520225	0.332	0.166	3.22431e-19	ActivateMG	rgs3b
ENSDARG00000035308~~grb10b	9.76771e-184	1.74079	0.993	0.496	3.17646e-179	ActivateMG	grb10b	4.42467e-137	1.08931	0.926	0.424	1.4389e-132	ActivateMG	grb10b
ENSDARG00000035682~~FP102018.1	5.48526e-80	0.77232	0.393	0.086	1.78381e-75	ActivateMG	FP102018.1	4.61723e-81	0.864631	0.415	0.12	1.50152e-76	ActivateMG	FP102018.1
ENSDARG00000035694~~stm	1.13509e-66	1.58341	0.161	0.017	3.69133e-62	ActivateMG	stm	6.43738e-44	0.601353	0.205	0.051	2.09344e-39	ActivateMG	stm
ENSDARG00000035895~~fndc5b	2.18706e-80	0.705246	0.234	0.031	7.11233e-76	ActivateMG	fndc5b	3.22114e-53	0.606768	0.158	0.026	1.04751e-48	ActivateMG	fndc5b
ENSDARG00000036036~~mdka	5.89998e-167	1.71237	0.995	0.355	1.91867e-162	ActivateMG	mdka	1.51874e-209	1.60554	0.991	0.45	4.93895e-205	ActivateMG	mdka
ENSDARG00000036080~~cd81a	3.24461e-114	1.09807	0.963	0.481	1.05515e-109	ActivateMG	cd81a	1.73158e-109	0.84124	0.947	0.597	5.63109e-105	ActivateMG	cd81a
ENSDARG00000036090~~pard6gb	2.32668e-145	1.19877	0.951	0.335	7.56635e-141	ActivateMG	pard6gb	3.64513e-119	0.951282	0.848	0.342	1.1854e-114	ActivateMG	pard6gb
ENSDARG00000036147~~ano5b	4.35587e-66	0.762755	0.773	0.278	1.41653e-61	ActivateMG	ano5b	7.51044e-39	0.545832	0.574	0.266	2.44239e-34	ActivateMG	ano5b
ENSDARG00000036279~~lamc1	2.15078e-104	1.09924	0.741	0.25	6.99432e-100	ActivateMG	lamc1	7.75734e-105	0.988988	0.654	0.236	2.52269e-100	ActivateMG	lamc1
ENSDARG00000036558~~col18a1a	1.54507e-192	1.91008	0.971	0.372	5.02456e-188	ActivateMG	col18a1a	1.2237e-258	1.79449	1	0.431	3.97946e-254	ActivateMG	col18a1a
ENSDARG00000036774~~rgs12b	9.82852e-98	0.926401	0.839	0.283	3.19623e-93	ActivateMG	rgs12b	5.45536e-75	0.762157	0.736	0.3	1.77408e-70	ActivateMG	rgs12b
ENSDARG00000036863~~MYO1D	2.09365e-85	1.03337	0.368	0.076	6.80854e-81	ActivateMG	MYO1D	1.04771e-49	0.710657	0.241	0.063	3.40715e-45	ActivateMG	MYO1D
ENSDARG00000037196~~arid5b	5.34621e-53	0.655895	0.971	0.565	1.73859e-48	ActivateMG	arid5b	7.04647e-52	0.507837	0.978	0.633	2.29151e-47	ActivateMG	arid5b
ENSDARG00000037363~~dennd2b	3.99294e-135	1.12169	0.788	0.221	1.2985e-130	ActivateMG	dennd2b	5.15718e-82	0.849584	0.598	0.231	1.67712e-77	ActivateMG	dennd2b
ENSDARG00000037476~~sorbs3	9.33009e-176	1.36782	0.89	0.21	3.03415e-171	ActivateMG	sorbs3	2.29104e-97	0.881989	0.701	0.219	7.45047e-93	ActivateMG	sorbs3
ENSDARG00000037677~~fgf24	1.31457e-118	0.990359	0.693	0.171	4.275e-114	ActivateMG	fgf24	1.44627e-101	0.901966	0.649	0.207	4.70328e-97	ActivateMG	fgf24
ENSDARG00000037879~~lfng	5.57002e-166	1.44037	0.927	0.285	1.81137e-161	ActivateMG	lfng	3.25516e-164	1.33275	0.911	0.324	1.05858e-159	ActivateMG	lfng
ENSDARG00000038159~~tcf7l1a	1.12271e-119	1.12899	0.763	0.222	3.65104e-115	ActivateMG	tcf7l1a	6.86129e-108	0.951697	0.663	0.217	2.23129e-103	ActivateMG	tcf7l1a
ENSDARG00000038446~~nrp2b	7.72333e-100	0.883796	1	0.755	2.51163e-95	ActivateMG	nrp2b	7.70241e-112	0.883466	0.978	0.653	2.50482e-107	ActivateMG	nrp2b
ENSDARG00000039373~~epha3	2.88502e-33	0.555496	0.788	0.399	9.38208e-29	ActivateMG	epha3	2.69426e-44	0.573217	0.797	0.427	8.76175e-40	ActivateMG	epha3
ENSDARG00000039576~~fstl1b	1.17727e-46	0.638977	0.507	0.185	3.82849e-42	ActivateMG	fstl1b	4.31503e-54	0.718682	0.475	0.199	1.40325e-49	ActivateMG	fstl1b
ENSDARG00000039987~~hivep2a	1.6018e-24	0.972231	0.624	0.381	5.20906e-20	ActivateMG	hivep2a	1.19601e-21	0.538043	0.502	0.314	3.88942e-17	ActivateMG	hivep2a
ENSDARG00000040009~~palld	2.99721e-71	0.815023	0.473	0.131	9.74692e-67	ActivateMG	palld	4.14745e-48	0.747988	0.301	0.1	1.34875e-43	ActivateMG	palld
ENSDARG00000040027~~osbpl10b	6.90176e-41	0.595664	0.368	0.122	2.24445e-36	ActivateMG	osbpl10b	3.86989e-34	0.587172	0.361	0.158	1.25849e-29	ActivateMG	osbpl10b
ENSDARG00000040162~~fgfbp3	9.60086e-121	0.742051	0.22	0.016	3.1222e-116	ActivateMG	fgfbp3	1.53309e-132	0.884407	0.208	0.015	4.9856e-128	ActivateMG	fgfbp3
ENSDARG00000040291~~cadm4	5.49209e-126	0.990239	0.988	0.902	1.78603e-121	ActivateMG	cadm4	5.35012e-176	1.02731	0.995	0.909	1.73986e-171	ActivateMG	cadm4
ENSDARG00000040469~~enpp6	2.66865e-59	0.724383	0.405	0.113	8.67844e-55	ActivateMG	enpp6	6.91836e-40	0.694512	0.301	0.112	2.24985e-35	ActivateMG	enpp6
ENSDARG00000040623~~fosl2	6.3768e-93	1.17528	0.717	0.256	2.07374e-88	ActivateMG	fosl2	3.75476e-64	0.813648	0.578	0.249	1.22105e-59	ActivateMG	fosl2
ENSDARG00000040674~~ctdsp1	2.50648e-49	0.688789	0.378	0.116	8.15106e-45	ActivateMG	ctdsp1	9.34668e-39	0.629093	0.33	0.128	3.03954e-34	ActivateMG	ctdsp1
ENSDARG00000040717~~macc1	1.29611e-66	0.792414	0.615	0.201	4.21495e-62	ActivateMG	macc1	1.67079e-43	0.614812	0.533	0.233	5.43342e-39	ActivateMG	macc1
ENSDARG00000040764~~id1	8.21266e-211	1.68162	0.961	0.278	2.67076e-206	ActivateMG	id1	4.57249e-201	1.44976	0.926	0.307	1.48698e-196	ActivateMG	id1
ENSDARG00000041483~~paqr6	1.87146e-47	0.647697	0.302	0.08	6.086e-43	ActivateMG	paqr6	3.77407e-54	0.72487	0.293	0.087	1.22733e-49	ActivateMG	paqr6
ENSDARG00000042249~~FRMD4A	5.15105e-49	0.649429	0.707	0.297	1.67512e-44	ActivateMG	FRMD4A	3.85627e-34	0.55445	0.531	0.285	1.25406e-29	ActivateMG	FRMD4A
ENSDARG00000042277~~efnb3b	2.06116e-56	0.704415	0.92	0.5	6.7029e-52	ActivateMG	efnb3b	3.36906e-87	0.805669	0.938	0.489	1.09562e-82	ActivateMG	efnb3b
ENSDARG00000042816~~mmp9	6.04876e-180	2.04501	0.393	0.039	1.96706e-175	ActivateMG	mmp9	9.1382e-176	2.37267	0.511	0.096	2.97174e-171	ActivateMG	mmp9
ENSDARG00000042840~~eml1	1.27954e-107	0.929633	0.959	0.597	4.16106e-103	ActivateMG	eml1	2.35453e-104	0.759619	0.935	0.515	7.65692e-100	ActivateMG	eml1
ENSDARG00000042902~~afg1lb	4.1687e-36	0.525774	0.427	0.158	1.35566e-31	ActivateMG	afg1lb	6.51288e-35	0.541505	0.337	0.132	2.11799e-30	ActivateMG	afg1lb
ENSDARG00000043210~~nfic	1.46187e-128	0.937756	0.998	0.655	4.75402e-124	ActivateMG	nfic	6.9105e-91	0.699457	0.98	0.648	2.24729e-86	ActivateMG	nfic
ENSDARG00000043475~~ENSDARG00000043475	2.18241e-84	0.864989	0.685	0.209	7.09721e-80	ActivateMG	ENSDARG00000043475	2.1843e-48	0.647064	0.534	0.223	7.10336e-44	ActivateMG	ENSDARG00000043475
ENSDARG00000043658~~cxadr	3.18815e-111	0.793115	0.976	0.729	1.03679e-106	ActivateMG	cxadr	4.37388e-74	0.658054	0.955	0.626	1.42239e-69	ActivateMG	cxadr
ENSDARG00000043710~~parvaa	1.35337e-57	0.716662	0.429	0.127	4.40116e-53	ActivateMG	parvaa	7.41882e-34	0.603836	0.299	0.117	2.4126e-29	ActivateMG	parvaa
ENSDARG00000044251~~rasgef1bb	8.9592e-97	1.07193	0.705	0.235	2.91353e-92	ActivateMG	rasgef1bb	1.92741e-60	0.705119	0.543	0.222	6.26793e-56	ActivateMG	rasgef1bb
ENSDARG00000044281~~erbin	1.92327e-67	0.724689	0.968	0.479	6.25446e-63	ActivateMG	erbin	5.90843e-52	0.548337	0.933	0.523	1.92142e-47	ActivateMG	erbin
ENSDARG00000044601~~rtn4a	1.6699e-102	0.887077	0.983	0.6	5.43051e-98	ActivateMG	rtn4a	3.77751e-125	0.932571	0.986	0.603	1.22845e-120	ActivateMG	rtn4a
ENSDARG00000044718~~vav2	6.43134e-86	1.04514	0.627	0.211	2.09147e-81	ActivateMG	vav2	1.32099e-75	1.045	0.589	0.255	4.29587e-71	ActivateMG	vav2
ENSDARG00000044902~~atp2b4	1.03523e-110	1.08747	0.785	0.266	3.36658e-106	ActivateMG	atp2b4	3.95321e-70	0.803588	0.645	0.289	1.28558e-65	ActivateMG	atp2b4
ENSDARG00000045064~~ablim1b	3.66883e-85	0.944235	0.937	0.378	1.1931e-80	ActivateMG	ablim1b	2.31705e-83	0.857194	0.868	0.389	7.53506e-79	ActivateMG	ablim1b
ENSDARG00000045486~~pawr	3.81512e-67	0.650485	0.968	0.372	1.24068e-62	ActivateMG	pawr	4.48277e-52	0.54207	0.891	0.431	1.4578e-47	ActivateMG	pawr
ENSDARG00000045548~~lepb	5.06291e-60	0.871566	0.302	0.069	1.64646e-55	ActivateMG	lepb	7.6929e-126	1.13821	0.444	0.097	2.50173e-121	ActivateMG	lepb
ENSDARG00000045926~~crabp1a	8.89251e-122	1.19601	0.78	0.265	2.89184e-117	ActivateMG	crabp1a	6.13466e-162	1.14845	0.884	0.345	1.99499e-157	ActivateMG	crabp1a
ENSDARG00000045936~~pax6b	9.6073e-112	0.853283	0.966	0.419	3.12429e-107	ActivateMG	pax6b	7.35568e-114	0.691132	0.96	0.461	2.39207e-109	ActivateMG	pax6b
ENSDARG00000051874~~stra6	1.4593e-104	0.730525	0.232	0.022	4.74566e-100	ActivateMG	stra6	1.39627e-59	0.73535	0.232	0.05	4.54067e-55	ActivateMG	stra6
ENSDARG00000051975~~cd99	1.28691e-78	0.860342	0.466	0.119	4.18503e-74	ActivateMG	cd99	1.12365e-63	0.830257	0.487	0.185	3.65412e-59	ActivateMG	cd99
ENSDARG00000052094~~notch1b	3.65737e-179	1.6567	0.988	0.462	1.18938e-174	ActivateMG	notch1b	5.21385e-229	1.63852	0.978	0.354	1.69554e-224	ActivateMG	notch1b
ENSDARG00000052131~~gli3	1.00349e-126	1.1927	0.79	0.251	3.26336e-122	ActivateMG	gli3	9.91328e-184	1.34227	0.822	0.299	3.2238e-179	ActivateMG	gli3
ENSDARG00000052139~~notch3	1.81805e-211	1.58886	0.92	0.251	5.9123e-207	ActivateMG	notch3	5.22648e-244	1.61897	0.913	0.286	1.69965e-239	ActivateMG	notch3
ENSDARG00000053003~~slc35f1	3.98354e-143	1.45669	0.82	0.238	1.29545e-138	ActivateMG	slc35f1	7.95057e-147	1.27376	0.668	0.184	2.58553e-142	ActivateMG	slc35f1
ENSDARG00000053113~~ly75	2.69575e-46	0.836598	0.4	0.134	8.76659e-42	ActivateMG	ly75	2.37096e-29	0.574948	0.348	0.158	7.71036e-25	ActivateMG	ly75
ENSDARG00000053272~~RAP1GAP	1.62862e-73	0.854333	0.517	0.153	5.29628e-69	ActivateMG	RAP1GAP	4.0597e-95	0.944934	0.518	0.163	1.32021e-90	ActivateMG	RAP1GAP
ENSDARG00000053454~~cntn3b	8.41516e-137	1.16189	0.615	0.14	2.73661e-132	ActivateMG	cntn3b	2.01977e-44	0.644803	0.422	0.176	6.56831e-40	ActivateMG	cntn3b
ENSDARG00000053666~~myb	5.93385e-93	0.871273	0.583	0.151	1.92969e-88	ActivateMG	myb	1.03553e-59	0.744592	0.388	0.123	3.36756e-55	ActivateMG	myb
ENSDARG00000053835~~plekhh1	1.75999e-272	1.68635	0.924	0.194	5.72349e-268	ActivateMG	plekhh1	3.0417e-163	1.17748	0.688	0.195	9.89162e-159	ActivateMG	plekhh1
ENSDARG00000054823~~id3	7.75257e-41	0.622147	0.315	0.095	2.52113e-36	ActivateMG	id3	8.71896e-35	0.602218	0.248	0.086	2.8354e-30	ActivateMG	id3
ENSDARG00000054879~~six3b	8.18621e-58	0.703394	0.39	0.108	2.66216e-53	ActivateMG	six3b	7.32507e-109	0.935643	0.54	0.149	2.38211e-104	ActivateMG	six3b
ENSDARG00000054978~~kifc3	1.48777e-80	0.981975	0.654	0.229	4.83822e-76	ActivateMG	kifc3	4.36868e-46	0.727623	0.516	0.247	1.4207e-41	ActivateMG	kifc3
ENSDARG00000055158~~prox1a	2.64271e-71	0.596161	0.951	0.455	8.5941e-67	ActivateMG	prox1a	4.90356e-58	0.565082	0.904	0.475	1.59464e-53	ActivateMG	prox1a
ENSDARG00000055302~~grid2	2.01929e-29	0.965459	0.434	0.2	6.56675e-25	ActivateMG	grid2	7.42393e-99	1.4626	0.625	0.246	2.41426e-94	ActivateMG	grid2
ENSDARG00000055381~~bambia	7.4611e-123	1.18956	0.654	0.176	2.42635e-118	ActivateMG	bambia	4.06836e-74	0.872823	0.547	0.204	1.32303e-69	ActivateMG	bambia
ENSDARG00000055455~~gpm6aa	4.56078e-65	0.749893	0.917	0.557	1.48317e-60	ActivateMG	gpm6aa	6.40343e-77	0.673073	0.967	0.641	2.0824e-72	ActivateMG	gpm6aa
ENSDARG00000055678~~akap12b	1.48452e-175	1.2521	0.746	0.167	4.82767e-171	ActivateMG	akap12b	4.25918e-96	0.941592	0.592	0.214	1.38508e-91	ActivateMG	akap12b
ENSDARG00000056029~~cyp26c1	1.12133e-59	0.570817	0.163	0.02	3.64658e-55	ActivateMG	cyp26c1	1.64052e-51	0.629957	0.161	0.029	5.33497e-47	ActivateMG	cyp26c1
ENSDARG00000056156~~npdc1b	8.80755e-90	1.02145	0.556	0.158	2.86421e-85	ActivateMG	npdc1b	9.12698e-77	0.9614	0.518	0.183	2.96809e-72	ActivateMG	npdc1b
ENSDARG00000056619~~arhgap42a	4.41091e-76	1.07704	0.532	0.172	1.43443e-71	ActivateMG	arhgap42a	8.33253e-90	0.984998	0.473	0.142	2.70974e-85	ActivateMG	arhgap42a
ENSDARG00000056704~~RAMP1	1.59123e-29	0.679825	0.402	0.171	5.17469e-25	ActivateMG	RAMP1	1.13704e-50	0.746607	0.491	0.207	3.69766e-46	ActivateMG	RAMP1
ENSDARG00000056732~~her4.1	4.65153e-163	1.07234	0.385	0.041	1.51268e-158	ActivateMG	her4.1	8.99458e-134	1.08831	0.35	0.054	2.92504e-129	ActivateMG	her4.1
ENSDARG00000057121~~c7b	3.60646e-43	1.30973	0.271	0.073	1.17282e-38	ActivateMG	c7b	2.13524e-105	1.32473	0.431	0.101	6.94379e-101	ActivateMG	c7b
ENSDARG00000057286~~swap70b	1.44448e-74	0.765665	0.327	0.065	4.69743e-70	ActivateMG	swap70b	2.60263e-55	0.700702	0.286	0.081	8.46375e-51	ActivateMG	swap70b
ENSDARG00000057644~~adam8b	4.04825e-76	0.865807	0.571	0.185	1.31649e-71	ActivateMG	adam8b	9.51512e-33	0.592047	0.397	0.184	3.09432e-28	ActivateMG	adam8b
ENSDARG00000057671~~epas1b	6.18932e-123	1.16047	0.79	0.245	2.01277e-118	ActivateMG	epas1b	4.20802e-72	0.570955	0.627	0.234	1.36845e-67	ActivateMG	epas1b
ENSDARG00000057729~~ephb6	2.91576e-118	1.14271	0.98	0.513	9.48206e-114	ActivateMG	ephb6	4.12552e-130	0.958537	0.991	0.639	1.34162e-125	ActivateMG	ephb6
ENSDARG00000057737~~rxraa	1.46873e-79	0.952709	0.868	0.442	4.77631e-75	ActivateMG	rxraa	1.06393e-76	0.810298	0.774	0.324	3.45989e-72	ActivateMG	rxraa
ENSDARG00000057927~~rps6ka3b	4.96645e-67	0.776383	0.829	0.357	1.61509e-62	ActivateMG	rps6ka3b	4.02449e-102	0.895616	0.717	0.288	1.30876e-97	ActivateMG	rps6ka3b
ENSDARG00000058090~~cfap57	4.07251e-228	1.79222	0.773	0.155	1.32438e-223	ActivateMG	cfap57	4.06714e-203	1.3552	0.578	0.103	1.32263e-198	ActivateMG	cfap57
ENSDARG00000058259~~celsr1b	1.58573e-167	1.39267	0.966	0.377	5.15679e-163	ActivateMG	celsr1b	5.69763e-76	0.791472	0.888	0.429	1.85287e-71	ActivateMG	celsr1b
ENSDARG00000058459~~plekhg2	7.88842e-185	1.38315	0.802	0.185	2.56531e-180	ActivateMG	plekhg2	4.27261e-177	1.22905	0.705	0.184	1.38945e-172	ActivateMG	plekhg2
ENSDARG00000058666~~dennd2da	4.32814e-187	1.17023	0.488	0.061	1.40751e-182	ActivateMG	dennd2da	3.51826e-103	0.826975	0.268	0.039	1.14414e-98	ActivateMG	dennd2da
ENSDARG00000059333~~si:ch211-285f17.1	3.2067e-150	1.15664	0.6	0.119	1.04282e-145	ActivateMG	si:ch211-285f17.1	3.92919e-186	1.32561	0.712	0.178	1.27777e-181	ActivateMG	si:ch211-285f17.1
ENSDARG00000059460~~sbf2	2.70478e-84	0.830264	0.956	0.509	8.79594e-80	ActivateMG	sbf2	2.19603e-64	0.673845	0.842	0.474	7.14148e-60	ActivateMG	sbf2
ENSDARG00000059475~~camsap3	1.45702e-58	0.698141	0.824	0.358	4.73821e-54	ActivateMG	camsap3	3.78675e-54	0.591433	0.685	0.335	1.23145e-49	ActivateMG	camsap3
ENSDARG00000059587~~ABR	1.48584e-52	0.675672	0.902	0.485	4.83194e-48	ActivateMG	ABR	3.17649e-46	0.515231	0.875	0.498	1.03299e-41	ActivateMG	ABR
ENSDARG00000059897~~ntrk2a	1.26733e-130	1.17975	0.671	0.176	4.12134e-126	ActivateMG	ntrk2a	1.46084e-109	1.02545	0.665	0.253	4.75067e-105	ActivateMG	ntrk2a
ENSDARG00000059933~~plpp3	3.2554e-200	1.44548	0.866	0.212	1.05866e-195	ActivateMG	plpp3	1.65597e-162	1.19424	0.73	0.221	5.3852e-158	ActivateMG	plpp3
ENSDARG00000059939~~dab1a	1.29088e-58	0.684645	0.927	0.521	4.19794e-54	ActivateMG	dab1a	1.13418e-52	0.553498	0.888	0.49	3.68835e-48	ActivateMG	dab1a
ENSDARG00000060102~~kank1a	3.44594e-70	0.801561	0.637	0.217	1.12062e-65	ActivateMG	kank1a	4.02037e-30	0.538872	0.458	0.238	1.30742e-25	ActivateMG	kank1a
ENSDARG00000060127~~adamts3	1.07956e-112	1.46154	0.61	0.155	3.51074e-108	ActivateMG	adamts3	1.41223e-56	0.837209	0.426	0.16	4.59258e-52	ActivateMG	adamts3
ENSDARG00000060639~~apba2b	3.36982e-49	0.611055	0.4	0.12	1.09587e-44	ActivateMG	apba2b	6.17284e-56	0.684343	0.464	0.168	2.00741e-51	ActivateMG	apba2b
ENSDARG00000060768~~ankib1a	4.63599e-36	0.596218	0.59	0.26	1.50762e-31	ActivateMG	ankib1a	1.31226e-27	0.519669	0.435	0.226	4.26748e-23	ActivateMG	ankib1a
ENSDARG00000060841~~pik3c2a	1.83877e-95	0.949212	0.707	0.219	5.97968e-91	ActivateMG	pik3c2a	2.20731e-77	0.874013	0.54	0.204	7.17817e-73	ActivateMG	pik3c2a
ENSDARG00000061328~~cdon	8.7891e-105	0.85243	0.949	0.303	2.85821e-100	ActivateMG	cdon	4.85785e-109	0.870557	0.897	0.31	1.57977e-104	ActivateMG	cdon
ENSDARG00000061445~~adcy6a	6.51149e-122	1.0925	0.89	0.318	2.11754e-117	ActivateMG	adcy6a	2.03692e-136	1.04017	0.833	0.324	6.62405e-132	ActivateMG	adcy6a
ENSDARG00000061590~~cachd1	9.15667e-40	0.639335	0.52	0.21	2.97775e-35	ActivateMG	cachd1	3.73177e-44	0.674192	0.457	0.204	1.21357e-39	ActivateMG	cachd1
ENSDARG00000061697~~ca14	3.86967e-106	1.05829	0.707	0.194	1.25842e-101	ActivateMG	ca14	1.98777e-46	0.634442	0.467	0.187	6.46423e-42	ActivateMG	ca14
ENSDARG00000061699~~sipa1l3	3.05306e-51	0.58099	0.949	0.642	9.92856e-47	ActivateMG	sipa1l3	1.60447e-48	0.552827	0.918	0.547	5.21773e-44	ActivateMG	sipa1l3
ENSDARG00000061752~~ripor2	2.42728e-64	0.551503	0.754	0.291	7.89353e-60	ActivateMG	ripor2	1.58407e-64	0.718265	0.627	0.273	5.15139e-60	ActivateMG	ripor2
ENSDARG00000061764~~ahnak	3.66519e-30	0.555662	0.363	0.139	1.19192e-25	ActivateMG	ahnak	4.10039e-33	0.530693	0.339	0.142	1.33345e-28	ActivateMG	ahnak
ENSDARG00000061794~~jam3b	4.52388e-92	0.895195	0.971	0.535	1.47117e-87	ActivateMG	jam3b	2.5053e-92	0.768157	0.969	0.6	8.14724e-88	ActivateMG	jam3b
ENSDARG00000061940~~htr4	1.40759e-37	0.599949	0.48	0.19	4.57748e-33	ActivateMG	htr4	8.19353e-35	0.625429	0.406	0.188	2.66454e-30	ActivateMG	htr4
ENSDARG00000062023~~fndc3bb	9.0822e-92	0.908347	0.759	0.252	2.95353e-87	ActivateMG	fndc3bb	1.85814e-63	0.734614	0.565	0.235	6.04266e-59	ActivateMG	fndc3bb
ENSDARG00000062081~~tbc1d1	8.75294e-139	1.12692	0.646	0.153	2.84646e-134	ActivateMG	tbc1d1	1.69672e-79	0.847331	0.453	0.142	5.51775e-75	ActivateMG	tbc1d1
ENSDARG00000062268~~jarid2b	1.15978e-164	1.844	0.978	0.556	3.7716e-160	ActivateMG	jarid2b	1.37259e-174	1.54746	0.973	0.601	4.46365e-170	ActivateMG	jarid2b
ENSDARG00000062338~~zeb2a	3.85081e-85	0.769393	0.985	0.735	1.25228e-80	ActivateMG	zeb2a	5.50249e-61	0.568458	0.991	0.781	1.78941e-56	ActivateMG	zeb2a
ENSDARG00000062420~~nfia	5.03268e-57	0.786783	0.929	0.529	1.63663e-52	ActivateMG	nfia	1.40451e-83	1.03053	0.928	0.533	4.56745e-79	ActivateMG	nfia
ENSDARG00000062460~~SGK3	3.95731e-59	0.751412	0.495	0.158	1.28692e-54	ActivateMG	SGK3	7.33323e-24	0.505336	0.321	0.156	2.38477e-19	ActivateMG	SGK3
ENSDARG00000062573~~znrf3	2.73889e-38	0.642248	0.88	0.508	8.90686e-34	ActivateMG	znrf3	2.16429e-58	0.75043	0.79	0.463	7.03829e-54	ActivateMG	znrf3
ENSDARG00000062579~~kremen1	2.35753e-151	1.25274	0.956	0.359	7.66669e-147	ActivateMG	kremen1	6.21197e-128	1.06277	0.806	0.293	2.02013e-123	ActivateMG	kremen1
ENSDARG00000062631~~npffr1l2	2.58464e-45	0.67876	0.441	0.152	8.40524e-41	ActivateMG	npffr1l2	3.96433e-40	0.630637	0.393	0.155	1.2892e-35	ActivateMG	npffr1l2
ENSDARG00000062801~~erfl3	1.8454e-134	1.1225	0.8	0.236	6.00123e-130	ActivateMG	erfl3	9.19843e-66	0.754682	0.562	0.231	2.99133e-61	ActivateMG	erfl3
ENSDARG00000062831~~si:ch73-22o12.1	4.52397e-77	0.862905	0.868	0.405	1.47119e-72	ActivateMG	si:ch73-22o12.1	6.49085e-39	0.524879	0.725	0.41	2.11082e-34	ActivateMG	si:ch73-22o12.1
ENSDARG00000062855~~plekhg7	2.70313e-111	0.849432	0.883	0.239	8.79059e-107	ActivateMG	plekhg7	5.99895e-92	0.590385	0.821	0.26	1.95086e-87	ActivateMG	plekhg7
ENSDARG00000062972~~hip1	3.43003e-62	0.738765	0.888	0.426	1.11545e-57	ActivateMG	hip1	1.07882e-42	0.524016	0.717	0.385	3.50833e-38	ActivateMG	hip1
ENSDARG00000063040~~btbd11b	6.98619e-66	0.857239	0.534	0.173	2.27191e-61	ActivateMG	btbd11b	4.21379e-37	0.646238	0.388	0.175	1.37032e-32	ActivateMG	btbd11b
ENSDARG00000063068~~syne1b	3.74611e-93	0.889708	0.995	0.691	1.21823e-88	ActivateMG	syne1b	4.04512e-58	0.581357	0.989	0.658	1.31547e-53	ActivateMG	syne1b
ENSDARG00000063075~~soga1	4.10591e-40	0.53649	0.9	0.437	1.33524e-35	ActivateMG	soga1	1.17105e-50	0.613631	0.832	0.417	3.80825e-46	ActivateMG	soga1
ENSDARG00000063390~~pvrl2l	2.18638e-127	1.23682	0.944	0.346	7.1101e-123	ActivateMG	pvrl2l	4.6271e-122	1.13856	0.797	0.354	1.50473e-117	ActivateMG	pvrl2l
ENSDARG00000063416~~ptprk	1.30551e-137	1.32173	0.888	0.313	4.24552e-133	ActivateMG	ptprk	9.67519e-131	1.06772	0.918	0.344	3.14637e-126	ActivateMG	ptprk
ENSDARG00000063417~~erf	3.96411e-47	0.680569	0.4	0.132	1.28913e-42	ActivateMG	erf	5.47673e-33	0.572535	0.312	0.125	1.78103e-28	ActivateMG	erf
ENSDARG00000067549~~adamts12	3.85893e-67	0.592271	0.19	0.025	1.25492e-62	ActivateMG	adamts12	1.0173e-33	0.520348	0.154	0.039	3.30827e-29	ActivateMG	adamts12
ENSDARG00000067719~~wwtr1	1.17077e-71	0.782803	0.393	0.096	3.80735e-67	ActivateMG	wwtr1	1.86431e-43	0.634253	0.264	0.083	6.06272e-39	ActivateMG	wwtr1
ENSDARG00000067805~~ggcx	5.2033e-68	0.779721	0.473	0.137	1.69211e-63	ActivateMG	ggcx	1.27813e-78	0.812824	0.422	0.123	4.15648e-74	ActivateMG	ggcx
ENSDARG00000067976~~ar	5.29388e-38	0.582367	0.534	0.209	1.72157e-33	ActivateMG	ar	1.09229e-42	0.714474	0.4	0.174	3.55214e-38	ActivateMG	ar
ENSDARG00000068258~~lrch4	3.55526e-60	0.659834	0.941	0.579	1.15617e-55	ActivateMG	lrch4	4.43578e-93	0.791649	0.877	0.429	1.44252e-88	ActivateMG	lrch4
ENSDARG00000068261~~pros1	1.17004e-31	0.569949	0.31	0.108	3.80496e-27	ActivateMG	pros1	3.14951e-43	0.675193	0.348	0.135	1.02422e-38	ActivateMG	pros1
ENSDARG00000068401~~yap1	3.69261e-224	1.58272	0.946	0.269	1.20084e-219	ActivateMG	yap1	1.69812e-242	1.45089	0.913	0.292	5.52229e-238	ActivateMG	yap1
ENSDARG00000068586~~CU302253.1	1.67003e-114	0.966307	0.766	0.194	5.43095e-110	ActivateMG	CU302253.1	3.62761e-73	0.763289	0.611	0.21	1.1797e-68	ActivateMG	CU302253.1
ENSDARG00000068705~~tmem168a	1.33658e-42	0.545814	0.259	0.065	4.34657e-38	ActivateMG	tmem168a	8.43878e-37	0.501644	0.223	0.066	2.74429e-32	ActivateMG	tmem168a
ENSDARG00000068934~~cyp1b1	5.98832e-36	0.558441	0.22	0.057	1.9474e-31	ActivateMG	cyp1b1	1.88381e-66	0.905019	0.324	0.09	6.12614e-62	ActivateMG	cyp1b1
ENSDARG00000068965~~nrip1a	1.40784e-40	0.607928	0.663	0.297	4.57828e-36	ActivateMG	nrip1a	9.6686e-40	0.513772	0.594	0.285	3.14423e-35	ActivateMG	nrip1a
ENSDARG00000068973~~pdlim4	6.55878e-73	0.936121	0.466	0.133	2.13292e-68	ActivateMG	pdlim4	2.75115e-77	0.909273	0.426	0.134	8.94675e-73	ActivateMG	pdlim4
ENSDARG00000069093~~col2a1a	5.07599e-86	0.976326	0.683	0.213	1.65071e-81	ActivateMG	col2a1a	3.43989e-99	0.994995	0.639	0.217	1.11865e-94	ActivateMG	col2a1a
ENSDARG00000069113~~dbn1	1.03542e-153	1.05013	0.988	0.743	3.36718e-149	ActivateMG	dbn1	1.58978e-123	0.712131	0.996	0.777	5.16995e-119	ActivateMG	dbn1
ENSDARG00000069171~~gramd4a	1.49802e-117	1.12311	0.878	0.32	4.87155e-113	ActivateMG	gramd4a	6.72596e-111	0.939502	0.768	0.292	2.18728e-106	ActivateMG	gramd4a
ENSDARG00000069397~~zswim8	1.22538e-53	1.03962	0.727	0.344	3.98492e-49	ActivateMG	zswim8	6.92525e-33	0.765936	0.525	0.29	2.25209e-28	ActivateMG	zswim8
ENSDARG00000069548~~zgc:162780	2.24735e-47	0.668892	0.285	0.074	7.3084e-43	ActivateMG	zgc:162780	6.05553e-47	0.728129	0.337	0.122	1.96926e-42	ActivateMG	zgc:162780
ENSDARG00000069560~~kcnh3	8.28559e-88	0.990378	0.663	0.226	2.69447e-83	ActivateMG	kcnh3	1.71378e-75	0.902408	0.364	0.101	5.57321e-71	ActivateMG	kcnh3
ENSDARG00000069662~~fgf11a	5.17512e-78	0.790845	0.388	0.084	1.68295e-73	ActivateMG	fgf11a	1.81115e-115	0.910317	0.447	0.095	5.88987e-111	ActivateMG	fgf11a
ENSDARG00000069755~~mtmr11	7.3995e-148	1.19312	0.822	0.242	2.40632e-143	ActivateMG	mtmr11	2.77179e-98	0.903595	0.634	0.23	9.01385e-94	ActivateMG	mtmr11
ENSDARG00000069823~~proca1	4.68254e-93	0.938264	0.539	0.136	1.52276e-88	ActivateMG	proca1	3.31776e-141	1.23139	0.745	0.265	1.07894e-136	ActivateMG	proca1
ENSDARG00000069940~~ppap2d	4.26712e-100	0.909485	0.802	0.228	1.38767e-95	ActivateMG	ppap2d	1.03993e-112	1.03311	0.759	0.245	3.38185e-108	ActivateMG	ppap2d
ENSDARG00000069980~~lman1	7.26894e-31	0.503022	0.341	0.122	2.36386e-26	ActivateMG	lman1	1.73368e-32	0.53115	0.344	0.148	5.63794e-28	ActivateMG	lman1
ENSDARG00000070141~~si:ch211-191i18.2	1.38857e-97	0.874463	0.415	0.081	4.51563e-93	ActivateMG	si:ch211-191i18.2	2.98782e-136	1.06415	0.484	0.101	9.71639e-132	ActivateMG	si:ch211-191i18.2
ENSDARG00000070150~~jtb	1.98839e-72	0.726831	0.38	0.086	6.46624e-68	ActivateMG	jtb	4.00666e-68	0.70765	0.348	0.091	1.30296e-63	ActivateMG	jtb
ENSDARG00000070174~~PLEKHH3	4.89811e-65	0.783429	0.683	0.256	1.59286e-60	ActivateMG	PLEKHH3	1.85483e-50	0.668137	0.542	0.249	6.0319e-46	ActivateMG	PLEKHH3
ENSDARG00000070314~~cald1a	3.54151e-89	0.962564	0.751	0.267	1.1517e-84	ActivateMG	cald1a	5.35831e-56	0.718273	0.553	0.248	1.74252e-51	ActivateMG	cald1a
ENSDARG00000070688~~ncalda	1.62103e-51	0.667466	0.463	0.153	5.27158e-47	ActivateMG	ncalda	8.45022e-51	0.694966	0.395	0.142	2.74801e-46	ActivateMG	ncalda
ENSDARG00000070903~~met	1.70412e-151	2.23501	0.661	0.155	5.5418e-147	ActivateMG	met	6.93347e-136	1.60477	0.562	0.145	2.25476e-131	ActivateMG	met
ENSDARG00000070913~~sox2	2.1441e-142	1.07936	0.622	0.132	6.97262e-138	ActivateMG	sox2	1.05296e-111	0.986166	0.505	0.138	3.42424e-107	ActivateMG	sox2
ENSDARG00000071213~~rgl3a	8.6365e-155	1.24484	0.832	0.207	2.80859e-150	ActivateMG	rgl3a	7.14426e-124	0.970218	0.746	0.221	2.32331e-119	ActivateMG	rgl3a
ENSDARG00000071692~~prex2	3.16844e-115	1.20721	0.959	0.354	1.03038e-110	ActivateMG	prex2	3.52537e-115	0.843882	0.949	0.362	1.14645e-110	ActivateMG	prex2
ENSDARG00000073688~~nav2a	1.66304e-77	0.76671	0.959	0.398	5.40822e-73	ActivateMG	nav2a	6.39622e-56	0.547326	0.788	0.345	2.08005e-51	ActivateMG	nav2a
ENSDARG00000073738~~dennd2c	1.10232e-85	0.881406	0.5	0.126	3.58474e-81	ActivateMG	dennd2c	1.89512e-33	0.571904	0.29	0.111	6.16292e-29	ActivateMG	dennd2c
ENSDARG00000073957~~tox3	7.17863e-143	1.25739	0.976	0.407	2.33449e-138	ActivateMG	tox3	1.04232e-120	0.951311	0.938	0.453	3.38963e-116	ActivateMG	tox3
ENSDARG00000074060~~map3k14a	2.86045e-54	0.66752	0.517	0.175	9.30217e-50	ActivateMG	map3k14a	3.38734e-54	0.659343	0.429	0.157	1.10156e-49	ActivateMG	map3k14a
ENSDARG00000074235~~CR376783.1	2.14367e-92	0.771162	0.729	0.204	6.97121e-88	ActivateMG	CR376783.1	4.36136e-43	0.513045	0.525	0.211	1.41831e-38	ActivateMG	CR376783.1
ENSDARG00000074526~~zbtb16b	9.84298e-33	0.525147	0.371	0.136	3.20094e-28	ActivateMG	zbtb16b	7.75813e-38	0.564244	0.326	0.122	2.52294e-33	ActivateMG	zbtb16b
ENSDARG00000074563~~gpr37a	2.01879e-135	1.25987	0.917	0.289	6.5651e-131	ActivateMG	gpr37a	1.9546e-138	0.995372	0.837	0.258	6.35636e-134	ActivateMG	gpr37a
ENSDARG00000074589~~rin2	4.88815e-37	0.517321	0.273	0.079	1.58963e-32	ActivateMG	rin2	1.06594e-33	0.515393	0.223	0.072	3.46643e-29	ActivateMG	rin2
ENSDARG00000075045~~cxcl18b	5.44004e-48	1.20324	0.224	0.049	1.7691e-43	ActivateMG	cxcl18b	1.76185e-51	1.05674	0.31	0.097	5.72953e-47	ActivateMG	cxcl18b
ENSDARG00000075110~~dab2ipb	7.8526e-96	0.987284	0.941	0.449	2.55367e-91	ActivateMG	dab2ipb	9.10637e-84	0.924433	0.828	0.448	2.96139e-79	ActivateMG	dab2ipb
ENSDARG00000075249~~fam171a2a	1.50721e-69	0.809202	0.878	0.451	4.90145e-65	ActivateMG	fam171a2a	5.47103e-59	0.672997	0.759	0.413	1.77918e-54	ActivateMG	fam171a2a
ENSDARG00000075437~~shc1	2.88964e-50	0.681058	0.661	0.28	9.39712e-46	ActivateMG	shc1	1.41221e-35	0.547594	0.534	0.28	4.59249e-31	ActivateMG	shc1
ENSDARG00000075556~~luzp1	2.18488e-25	0.532709	0.371	0.158	7.10522e-21	ActivateMG	luzp1	6.49775e-28	0.522673	0.341	0.158	2.11307e-23	ActivateMG	luzp1
ENSDARG00000075725~~cep152	1.43448e-62	0.765338	0.534	0.177	4.66494e-58	ActivateMG	cep152	2.04036e-35	0.601763	0.373	0.164	6.63525e-31	ActivateMG	cep152
ENSDARG00000075942~~FRMD5	6.16364e-71	0.823886	0.949	0.706	2.00441e-66	ActivateMG	FRMD5	9.01717e-57	0.643889	0.949	0.684	2.93238e-52	ActivateMG	FRMD5
ENSDARG00000076002~~osbpl5	5.29571e-48	0.789284	0.512	0.202	1.72217e-43	ActivateMG	osbpl5	3.73014e-25	0.549548	0.322	0.157	1.21304e-20	ActivateMG	osbpl5
ENSDARG00000076140~~clcf1	4.86642e-181	1.57581	0.476	0.061	1.58256e-176	ActivateMG	clcf1	1.82295e-121	1.36471	0.333	0.054	5.92822e-117	ActivateMG	clcf1
ENSDARG00000076302~~dtx4a	8.24784e-46	0.714928	0.683	0.308	2.6822e-41	ActivateMG	dtx4a	6.23343e-52	0.679426	0.601	0.288	2.02711e-47	ActivateMG	dtx4a
ENSDARG00000076466~~maml1	1.71296e-53	0.663724	0.551	0.198	5.57055e-49	ActivateMG	maml1	7.69098e-39	0.582352	0.444	0.198	2.50111e-34	ActivateMG	maml1
ENSDARG00000076657~~plagl2	5.50342e-109	1.01237	0.695	0.206	1.78971e-104	ActivateMG	plagl2	2.49471e-119	1.0507	0.549	0.157	8.1128e-115	ActivateMG	plagl2
ENSDARG00000076787~~angpt4	2.01453e-131	1.26648	0.729	0.189	6.55124e-127	ActivateMG	angpt4	2.88219e-116	1.25432	0.636	0.223	9.37288e-112	ActivateMG	angpt4
ENSDARG00000076796~~dlg3	1.11162e-146	1.26843	0.983	0.402	3.61499e-142	ActivateMG	dlg3	1.58393e-172	1.17697	0.971	0.439	5.15096e-168	ActivateMG	dlg3
ENSDARG00000076804~~ttyh1	1.39762e-61	0.770303	0.79	0.348	4.54505e-57	ActivateMG	ttyh1	1.50482e-71	0.739913	0.777	0.379	4.89366e-67	ActivateMG	ttyh1
ENSDARG00000076867~~mrtfbb	6.65229e-63	0.751331	0.59	0.199	2.16332e-58	ActivateMG	mrtfbb	8.85837e-35	0.547641	0.435	0.206	2.88074e-30	ActivateMG	mrtfbb
ENSDARG00000076994~~adgra2	1.10565e-147	1.04729	0.927	0.224	3.59558e-143	ActivateMG	adgra2	5.10351e-138	1.06141	0.873	0.27	1.65966e-133	ActivateMG	adgra2
ENSDARG00000077174~~qsox2	2.20883e-32	0.721637	0.366	0.146	7.18313e-28	ActivateMG	qsox2	4.77376e-44	0.652301	0.368	0.137	1.55243e-39	ActivateMG	qsox2
ENSDARG00000077256~~nat8l	2.1902e-146	1.45559	0.746	0.206	7.12253e-142	ActivateMG	nat8l	8.11198e-185	1.49211	0.772	0.237	2.63802e-180	ActivateMG	nat8l
ENSDARG00000077762~~si:rp71-79p20.2	6.39824e-34	0.539374	0.802	0.39	2.08071e-29	ActivateMG	si:rp71-79p20.2	3.49153e-47	0.642016	0.719	0.365	1.13545e-42	ActivateMG	si:rp71-79p20.2
ENSDARG00000077864~~rasgrp3	1.08843e-132	1.12021	0.946	0.293	3.53956e-128	ActivateMG	rasgrp3	1.49083e-94	0.766616	0.875	0.334	4.84818e-90	ActivateMG	rasgrp3
ENSDARG00000078145~~si:ch211-218g4.2	2.35134e-85	0.655533	0.266	0.037	7.64657e-81	ActivateMG	si:ch211-218g4.2	3.44871e-72	0.658994	0.254	0.049	1.12152e-67	ActivateMG	si:ch211-218g4.2
ENSDARG00000078179~~fndc3ba	3.04821e-95	0.93729	0.788	0.26	9.91277e-91	ActivateMG	fndc3ba	1.41909e-73	0.81658	0.63	0.261	4.61488e-69	ActivateMG	fndc3ba
ENSDARG00000078270~~CU467961.1	5.54016e-45	0.730781	0.795	0.458	1.80166e-40	ActivateMG	CU467961.1	2.97693e-44	0.582588	0.623	0.312	9.68098e-40	ActivateMG	CU467961.1
ENSDARG00000078335~~amot	1.10262e-136	1.22947	0.776	0.2	3.58571e-132	ActivateMG	amot	7.42845e-129	1.12492	0.591	0.172	2.41573e-124	ActivateMG	amot
ENSDARG00000078523~~ddr1	7.91189e-189	1.75139	0.841	0.231	2.57295e-184	ActivateMG	ddr1	4.54584e-174	1.69912	0.734	0.247	1.47831e-169	ActivateMG	ddr1
ENSDARG00000078847~~si:dkey-238o13.4	8.17202e-105	1.02136	0.354	0.057	2.65754e-100	ActivateMG	si:dkey-238o13.4	2.95749e-154	1.1031	0.424	0.068	9.61775e-150	ActivateMG	si:dkey-238o13.4
ENSDARG00000079144~~bcl2l11	1.48518e-67	0.763936	0.441	0.119	4.82979e-63	ActivateMG	bcl2l11	3.6949e-46	0.651681	0.351	0.125	1.20158e-41	ActivateMG	bcl2l11
ENSDARG00000079264~~baiap3	1.43253e-111	0.873787	0.288	0.034	4.65859e-107	ActivateMG	baiap3	1.12358e-35	0.603709	0.17	0.044	3.65387e-31	ActivateMG	baiap3
ENSDARG00000079286~~bcr	1.42035e-67	1.06847	0.771	0.387	4.61896e-63	ActivateMG	bcr	6.44808e-30	0.585829	0.572	0.334	2.09692e-25	ActivateMG	bcr
ENSDARG00000079438~~pkp3b	2.66678e-35	0.512482	0.198	0.047	8.67237e-31	ActivateMG	pkp3b	9.92198e-49	0.583484	0.234	0.061	3.22663e-44	ActivateMG	pkp3b
ENSDARG00000079588~~castor1	4.621e-120	1.07421	0.856	0.248	1.50275e-115	ActivateMG	castor1	1.02738e-89	0.847706	0.73	0.253	3.34102e-85	ActivateMG	castor1
ENSDARG00000079900~~shroom4	1.29848e-103	1.00222	0.61	0.168	4.22266e-99	ActivateMG	shroom4	2.33299e-62	0.743249	0.48	0.181	7.58688e-58	ActivateMG	shroom4
ENSDARG00000079912~~rapgefl1	7.53569e-239	1.90432	0.929	0.252	2.45061e-234	ActivateMG	rapgefl1	1.58689e-228	1.48315	0.889	0.283	5.16056e-224	ActivateMG	rapgefl1
ENSDARG00000079917~~rassf7a	7.76314e-72	0.816421	0.859	0.339	2.52457e-67	ActivateMG	rassf7a	1.97923e-45	0.583277	0.781	0.397	6.43644e-41	ActivateMG	rassf7a
ENSDARG00000079967~~prkd3	4.03833e-90	0.992994	0.834	0.312	1.31326e-85	ActivateMG	prkd3	5.65359e-78	0.818904	0.763	0.325	1.83855e-73	ActivateMG	prkd3
ENSDARG00000086269~~ndst2a	2.22915e-69	0.717735	0.98	0.625	7.2492e-65	ActivateMG	ndst2a	1.36005e-123	0.855805	0.969	0.592	4.42289e-119	ActivateMG	ndst2a
ENSDARG00000086703~~si:dkey-126g1.7	1.1572e-151	0.963346	0.393	0.047	3.76321e-147	ActivateMG	si:dkey-126g1.7	5.41113e-120	0.93028	0.379	0.071	1.7597e-115	ActivateMG	si:dkey-126g1.7
ENSDARG00000086927~~pik3c2b	3.35489e-153	1.2251	0.929	0.347	1.09101e-148	ActivateMG	pik3c2b	3.84517e-151	1.05073	0.877	0.329	1.25045e-146	ActivateMG	pik3c2b
ENSDARG00000086950~~si:ch211-269k10.2	5.30995e-54	0.681005	0.298	0.071	1.7268e-49	ActivateMG	si:ch211-269k10.2	6.78188e-24	0.534717	0.201	0.078	2.20547e-19	ActivateMG	si:ch211-269k10.2
ENSDARG00000087260~~mtss1lb	5.23906e-44	0.542047	0.885	0.401	1.70374e-39	ActivateMG	mtss1lb	2.7273e-54	0.568408	0.842	0.391	8.86918e-50	ActivateMG	mtss1lb
ENSDARG00000087352~~dnah2	5.69537e-93	0.870778	0.415	0.085	1.85213e-88	ActivateMG	dnah2	8.49524e-71	0.662717	0.234	0.043	2.76265e-66	ActivateMG	dnah2
ENSDARG00000087373~~dnah5	2.17147e-202	1.17134	0.522	0.064	7.06162e-198	ActivateMG	dnah5	8.05882e-60	0.681938	0.228	0.049	2.62073e-55	ActivateMG	dnah5
ENSDARG00000087646~~runx1	9.70528e-68	1.34903	0.412	0.116	3.15616e-63	ActivateMG	runx1	1.43952e-45	0.779313	0.328	0.116	4.68132e-41	ActivateMG	runx1
ENSDARG00000087688~~klhl29	2.84475e-50	0.710509	0.824	0.479	9.25113e-46	ActivateMG	klhl29	2.35669e-53	0.611544	0.808	0.481	7.66396e-49	ActivateMG	klhl29
ENSDARG00000087804~~tnfrsf11a	1.62359e-70	0.799184	0.473	0.131	5.27993e-66	ActivateMG	tnfrsf11a	1.74737e-36	0.648748	0.317	0.128	5.68244e-32	ActivateMG	tnfrsf11a
ENSDARG00000087822~~agap3	1.47782e-132	1.27179	0.91	0.438	4.80586e-128	ActivateMG	agap3	5.01791e-113	0.937549	0.88	0.442	1.63182e-108	ActivateMG	agap3
ENSDARG00000087921~~plce1	1.72998e-174	1.41293	0.954	0.325	5.62588e-170	ActivateMG	plce1	8.54476e-159	1.15542	0.889	0.349	2.77876e-154	ActivateMG	plce1
ENSDARG00000089190~~tanc1b	2.0721e-121	1.07348	0.971	0.48	6.73848e-117	ActivateMG	tanc1b	7.56758e-67	0.715447	0.913	0.506	2.46098e-62	ActivateMG	tanc1b
ENSDARG00000089878~~nedd9	8.34535e-107	1.02324	0.817	0.271	2.71391e-102	ActivateMG	nedd9	1.98111e-57	0.710207	0.601	0.273	6.44257e-53	ActivateMG	nedd9
ENSDARG00000090170~~rab11fip4a	2.25589e-40	0.544167	0.959	0.629	7.33616e-36	ActivateMG	rab11fip4a	3.00322e-39	0.516999	0.92	0.586	9.76647e-35	ActivateMG	rab11fip4a
ENSDARG00000090427~~si:dkey-246i14.3	7.46133e-99	1.06323	0.69	0.221	2.42642e-94	ActivateMG	si:dkey-246i14.3	2.69363e-87	0.896953	0.687	0.26	8.75969e-83	ActivateMG	si:dkey-246i14.3
ENSDARG00000090552~~si:dkey-7j14.6	2.18571e-75	0.830423	0.732	0.268	7.10794e-71	ActivateMG	si:dkey-7j14.6	7.38442e-75	0.816749	0.725	0.335	2.40141e-70	ActivateMG	si:dkey-7j14.6
ENSDARG00000090585~~gpc1b	8.64052e-38	0.602381	0.202	0.047	2.8099e-33	ActivateMG	gpc1b	1.14066e-26	0.560018	0.232	0.088	3.70942e-22	ActivateMG	gpc1b
ENSDARG00000092499~~si:ch211-183d21.1	4.63696e-43	0.60762	0.302	0.085	1.50794e-38	ActivateMG	si:ch211-183d21.1	7.70722e-37	0.609382	0.301	0.113	2.50639e-32	ActivateMG	si:ch211-183d21.1
ENSDARG00000092671~~pard3ba	3.11246e-118	1.35797	0.82	0.285	1.01217e-113	ActivateMG	pard3ba	6.70614e-84	0.989291	0.75	0.346	2.18084e-79	ActivateMG	pard3ba
ENSDARG00000093052~~c6	3.79098e-54	0.588546	0.176	0.026	1.23283e-49	ActivateMG	c6	1.52767e-80	0.561844	0.158	0.016	4.96797e-76	ActivateMG	c6
ENSDARG00000093120~~si:dkey-117m1.4	1.18388e-52	0.638555	0.366	0.101	3.84998e-48	ActivateMG	si:dkey-117m1.4	9.03155e-70	0.736941	0.38	0.108	2.93706e-65	ActivateMG	si:dkey-117m1.4
ENSDARG00000093569~~bckdhbl	1.20928e-23	0.506514	0.356	0.155	3.93259e-19	ActivateMG	bckdhbl	3.67162e-32	0.561713	0.426	0.208	1.19401e-27	ActivateMG	bckdhbl
ENSDARG00000094064~~CR788236.1	1.49903e-141	1.20503	0.79	0.228	4.87484e-137	ActivateMG	CR788236.1	7.14973e-152	1.13797	0.708	0.216	2.32509e-147	ActivateMG	CR788236.1
ENSDARG00000094301~~BX537274.1	3.56932e-79	0.857312	0.69	0.242	1.16074e-74	ActivateMG	BX537274.1	1.82181e-82	0.864508	0.56	0.204	5.92452e-78	ActivateMG	BX537274.1
ENSDARG00000094426~~her4.2	1.07297e-228	1.50631	0.724	0.12	3.48929e-224	ActivateMG	her4.2	8.72908e-240	1.56479	0.694	0.139	2.8387e-235	ActivateMG	her4.2
ENSDARG00000095557~~BX664610.1	2.04084e-99	1.19671	0.876	0.507	6.6368e-95	ActivateMG	BX664610.1	8.78121e-81	0.920289	0.899	0.529	2.85565e-76	ActivateMG	BX664610.1
ENSDARG00000095715~~BX465834.1	1.22625e-116	1.29876	0.978	0.42	3.98778e-112	ActivateMG	BX465834.1	3.0229e-112	1.00997	0.967	0.463	9.83048e-108	ActivateMG	BX465834.1
ENSDARG00000095844~~FP102167.1	1.19227e-58	0.712577	0.429	0.127	3.87727e-54	ActivateMG	FP102167.1	2.51962e-78	0.799036	0.435	0.131	8.19382e-74	ActivateMG	FP102167.1
ENSDARG00000095906~~CR848047.1	4.35672e-170	1.69718	0.985	0.395	1.41681e-165	ActivateMG	CR848047.1	2.87165e-174	1.51832	0.971	0.422	9.33859e-170	ActivateMG	CR848047.1
ENSDARG00000096147~~BX465862.4	5.64474e-50	1.02397	0.4	0.133	1.83567e-45	ActivateMG	BX465862.4	1.40795e-29	0.583794	0.328	0.145	4.57866e-25	ActivateMG	BX465862.4
ENSDARG00000096546~~nrp2a	1.91993e-72	0.755019	0.68	0.226	6.24361e-68	ActivateMG	nrp2a	1.45282e-81	0.818291	0.65	0.246	4.72457e-77	ActivateMG	nrp2a
ENSDARG00000096635~~si:ch211-122h15.4	1.11195e-139	1.10202	0.915	0.25	3.61608e-135	ActivateMG	si:ch211-122h15.4	2.00068e-110	0.858892	0.822	0.259	6.50622e-106	ActivateMG	si:ch211-122h15.4
ENSDARG00000096867~~clmn	2.72901e-57	0.742792	0.588	0.202	8.87473e-53	ActivateMG	clmn	6.79634e-51	0.670933	0.524	0.221	2.21017e-46	ActivateMG	clmn
ENSDARG00000097478~~qkia	5.96734e-142	1.21507	0.971	0.348	1.94058e-137	ActivateMG	qkia	2.45274e-111	0.969531	0.9	0.376	7.97632e-107	ActivateMG	qkia
ENSDARG00000097617~~si:ch211-178n15.1	5.84031e-85	1.17482	0.376	0.079	1.89927e-80	ActivateMG	si:ch211-178n15.1	2.89647e-92	0.897575	0.393	0.097	9.41932e-88	ActivateMG	si:ch211-178n15.1
ENSDARG00000097750~~CR854827.3	2.68039e-34	0.580158	0.495	0.211	8.71661e-30	ActivateMG	CR854827.3	2.83296e-39	0.648964	0.475	0.227	9.21278e-35	ActivateMG	CR854827.3
ENSDARG00000098005~~BX004996.1	2.39135e-117	1.18372	0.539	0.125	7.77669e-113	ActivateMG	BX004996.1	1.1657e-64	0.790843	0.337	0.097	3.79086e-60	ActivateMG	BX004996.1
ENSDARG00000098237~~fbn2b	1.03431e-43	0.62786	0.312	0.091	3.36357e-39	ActivateMG	fbn2b	3.01689e-70	0.755512	0.341	0.091	9.81092e-66	ActivateMG	fbn2b
ENSDARG00000098294~~col5a3a	2.91099e-145	1.01215	0.417	0.057	9.46655e-141	ActivateMG	col5a3a	1.76171e-130	1.02151	0.435	0.086	5.72908e-126	ActivateMG	col5a3a
ENSDARG00000098368~~aplp1	1.70253e-76	0.973861	0.854	0.365	5.53662e-72	ActivateMG	aplp1	3.2595e-89	0.880483	0.924	0.501	1.05999e-84	ActivateMG	aplp1
ENSDARG00000098374~~ENSDARG00000098374	1.21072e-35	0.59258	0.361	0.126	3.93726e-31	ActivateMG	ENSDARG00000098374	1.33691e-52	0.713976	0.393	0.144	4.34763e-48	ActivateMG	ENSDARG00000098374
ENSDARG00000098512~~si:ch73-215f7.1	2.28848e-160	1.83213	0.917	0.406	7.44213e-156	ActivateMG	si:ch73-215f7.1	2.90369e-174	1.59771	0.935	0.455	9.44281e-170	ActivateMG	si:ch73-215f7.1
ENSDARG00000098592~~zgc:92140	3.01136e-44	0.650632	0.546	0.217	9.79296e-40	ActivateMG	zgc:92140	2.06391e-33	0.570977	0.42	0.201	6.71184e-29	ActivateMG	zgc:92140
ENSDARG00000098733~~pxdn	1.15707e-71	0.787628	0.439	0.114	3.7628e-67	ActivateMG	pxdn	5.28869e-71	0.847189	0.406	0.128	1.71988e-66	ActivateMG	pxdn
ENSDARG00000098802~~map7d1a	2.03e-49	0.706618	0.459	0.163	6.60156e-45	ActivateMG	map7d1a	5.49019e-37	0.599545	0.4	0.182	1.78541e-32	ActivateMG	map7d1a
ENSDARG00000098817~~KCTD5	9.48723e-39	0.619907	0.417	0.154	3.08525e-34	ActivateMG	KCTD5	2.0409e-28	0.568742	0.375	0.186	6.63699e-24	ActivateMG	KCTD5
ENSDARG00000099124~~f3a	9.0337e-78	0.809523	0.373	0.082	2.93776e-73	ActivateMG	f3a	1.70532e-69	0.806547	0.339	0.092	5.5457e-65	ActivateMG	f3a
ENSDARG00000099144~~igfbp3	2.11767e-306	2.26755	0.9	0.183	6.88666e-302	ActivateMG	igfbp3	6.36943e-276	1.953	0.837	0.228	2.07134e-271	ActivateMG	igfbp3
ENSDARG00000099220~~BX571942.1	1.82048e-42	0.614448	0.832	0.457	5.92019e-38	ActivateMG	BX571942.1	5.37451e-54	0.589953	0.866	0.517	1.74779e-49	ActivateMG	BX571942.1
ENSDARG00000099351~~igfbp1a	1.9202e-71	0.797522	0.568	0.177	6.24448e-67	ActivateMG	igfbp1a	3.59394e-104	0.960455	0.62	0.201	1.16875e-99	ActivateMG	igfbp1a
ENSDARG00000099555~~foxo1a	6.63541e-60	0.801586	0.863	0.423	2.15783e-55	ActivateMG	foxo1a	2.64438e-40	0.514571	0.708	0.385	8.59952e-36	ActivateMG	foxo1a
ENSDARG00000099767~~fhdc2	1.50891e-124	0.922001	0.378	0.053	4.90696e-120	ActivateMG	fhdc2	9.87111e-41	0.650534	0.232	0.07	3.21009e-36	ActivateMG	fhdc2
ENSDARG00000099831~~BX005396.2	6.74752e-74	0.833423	0.395	0.094	2.19429e-69	ActivateMG	BX005396.2	1.903e-60	0.789941	0.418	0.146	6.18856e-56	ActivateMG	BX005396.2
ENSDARG00000099970~~CR383676.2	4.57855e-128	0.68301	1	1	1.48894e-123	ActivateMG	CR383676.2	2.59664e-124	0.609526	1	1	8.44428e-120	ActivateMG	CR383676.2
ENSDARG00000100055~~tox2	2.01464e-131	1.21643	0.959	0.377	6.55162e-127	ActivateMG	tox2	1.5001e-122	0.989958	0.929	0.451	4.87833e-118	ActivateMG	tox2
ENSDARG00000100456~~ptk2aa	5.7731e-81	0.820455	0.741	0.253	1.87741e-76	ActivateMG	ptk2aa	1.29434e-67	0.701545	0.533	0.196	4.20921e-63	ActivateMG	ptk2aa
ENSDARG00000100606~~ARHGEF25	1.96306e-60	0.788294	0.461	0.144	6.38388e-56	ActivateMG	ARHGEF25	1.38172e-53	0.719499	0.402	0.149	4.49337e-49	ActivateMG	ARHGEF25
ENSDARG00000100693~~ddr2a	7.83183e-28	0.520939	0.317	0.119	2.54691e-23	ActivateMG	ddr2a	1.84478e-29	0.528557	0.232	0.085	5.99921e-25	ActivateMG	ddr2a
ENSDARG00000100729~~tln1	7.08777e-74	0.84648	0.737	0.277	2.30494e-69	ActivateMG	tln1	4.50862e-57	0.700992	0.611	0.278	1.4662e-52	ActivateMG	tln1
ENSDARG00000100731~~zgc:101540	1.47556e-46	0.679818	0.373	0.12	4.79852e-42	ActivateMG	zgc:101540	1.06436e-27	0.547514	0.272	0.114	3.46131e-23	ActivateMG	zgc:101540
ENSDARG00000100913~~arhgef12b	4.2688e-215	1.51183	0.946	0.308	1.38821e-210	ActivateMG	arhgef12b	6.75861e-223	1.36258	0.904	0.317	2.1979e-218	ActivateMG	arhgef12b
ENSDARG00000101482~~hk2	5.58607e-25	0.514677	0.215	0.071	1.81659e-20	ActivateMG	hk2	1.70449e-47	0.539879	0.187	0.04	5.54299e-43	ActivateMG	hk2
ENSDARG00000101584~~CU467822.2	2.02519e-139	1.80658	0.963	0.584	6.58593e-135	ActivateMG	CU467822.2	1.59373e-154	1.51017	0.962	0.59	5.18282e-150	ActivateMG	CU467822.2
ENSDARG00000102024~~chmp6b	4.61289e-73	0.881493	0.846	0.358	1.50011e-68	ActivateMG	chmp6b	1.43165e-63	0.800999	0.723	0.35	4.65571e-59	ActivateMG	chmp6b
ENSDARG00000102142~~ece2b	4.69722e-125	1.24247	0.81	0.269	1.52754e-120	ActivateMG	ece2b	2.54824e-73	0.88955	0.614	0.28	8.28689e-69	ActivateMG	ece2b
ENSDARG00000102180~~shroom3	4.87186e-144	1.19157	0.861	0.242	1.58433e-139	ActivateMG	shroom3	7.27396e-93	0.912374	0.632	0.236	2.36549e-88	ActivateMG	shroom3
ENSDARG00000102191~~CPNE8	2.43558e-132	1.24824	0.573	0.132	7.9205e-128	ActivateMG	CPNE8	4.94343e-96	1.04106	0.511	0.167	1.6076e-91	ActivateMG	CPNE8
ENSDARG00000102445~~si:dkey-22o22.2	2.228e-91	1.09868	0.946	0.455	7.24546e-87	ActivateMG	si:dkey-22o22.2	5.94967e-138	1.3591	0.911	0.453	1.93483e-133	ActivateMG	si:dkey-22o22.2
ENSDARG00000102470~~mpp7a	1.80478e-58	0.606095	0.961	0.683	5.86914e-54	ActivateMG	mpp7a	6.1443e-99	0.83401	0.909	0.477	1.99813e-94	ActivateMG	mpp7a
ENSDARG00000102626~~frem2b	2.95048e-86	0.88638	0.385	0.081	9.59495e-82	ActivateMG	frem2b	4.32708e-102	0.95045	0.418	0.103	1.40717e-97	ActivateMG	frem2b
ENSDARG00000102640~~pdia3	1.2077e-47	0.698938	0.763	0.363	3.92744e-43	ActivateMG	pdia3	1.57264e-37	0.504154	0.652	0.338	5.11421e-33	ActivateMG	pdia3
ENSDARG00000102855~~neo1a	2.75824e-91	0.987423	0.988	0.445	8.96978e-87	ActivateMG	neo1a	7.4578e-106	0.868813	0.986	0.529	2.42528e-101	ActivateMG	neo1a
ENSDARG00000102911~~iffo2b	2.89257e-66	0.733967	0.259	0.047	9.40664e-62	ActivateMG	iffo2b	6.37539e-60	0.748582	0.274	0.07	2.07328e-55	ActivateMG	iffo2b
ENSDARG00000103026~~p3h2	8.65265e-228	1.56875	0.876	0.211	2.81384e-223	ActivateMG	p3h2	7.9479e-232	1.45899	0.792	0.218	2.58466e-227	ActivateMG	p3h2
ENSDARG00000103109~~chl1b	3.35153e-131	1.09638	0.9	0.323	1.08992e-126	ActivateMG	chl1b	6.69849e-153	1.28076	0.819	0.306	2.17835e-148	ActivateMG	chl1b
ENSDARG00000103251~~sh3pxd2b	1.7128e-53	0.664276	0.568	0.202	5.57002e-49	ActivateMG	sh3pxd2b	9.13038e-45	0.59439	0.475	0.2	2.9692e-40	ActivateMG	sh3pxd2b
ENSDARG00000103413~~zgc:109949	7.10235e-33	0.522391	0.534	0.229	2.30969e-28	ActivateMG	zgc:109949	7.95629e-48	0.728633	0.543	0.262	2.58739e-43	ActivateMG	zgc:109949
ENSDARG00000103554~~notch1a	3.45355e-100	0.924072	0.924	0.335	1.1231e-95	ActivateMG	notch1a	1.34704e-95	0.809952	0.862	0.348	4.38056e-91	ActivateMG	notch1a
ENSDARG00000103615~~si:dkey-31j3.11	2.01373e-160	1.17928	0.851	0.223	6.54864e-156	ActivateMG	si:dkey-31j3.11	4.08718e-117	0.993621	0.649	0.219	1.32915e-112	ActivateMG	si:dkey-31j3.11
ENSDARG00000103648~~znf536	2.39826e-41	0.663188	0.99	0.695	7.79913e-37	ActivateMG	znf536	8.7228e-87	0.831897	1	0.647	2.83665e-82	ActivateMG	znf536
ENSDARG00000103699~~ptpn13	6.81739e-93	0.893073	0.993	0.52	2.21702e-88	ActivateMG	ptpn13	7.36635e-51	0.589922	0.935	0.55	2.39554e-46	ActivateMG	ptpn13
ENSDARG00000103735~~elovl1b	9.60551e-70	0.73191	0.3	0.059	3.12371e-65	ActivateMG	elovl1b	6.41705e-55	0.635268	0.266	0.069	2.08683e-50	ActivateMG	elovl1b
ENSDARG00000103830~~ddr2l	2.15094e-44	0.682644	0.454	0.164	6.99487e-40	ActivateMG	ddr2l	1.31604e-24	0.530683	0.353	0.179	4.27976e-20	ActivateMG	ddr2l
ENSDARG00000103979~~calr3a	4.32807e-54	0.808249	0.722	0.341	1.40749e-49	ActivateMG	calr3a	4.75498e-65	0.738298	0.708	0.336	1.54632e-60	ActivateMG	calr3a
ENSDARG00000104082~~trps1	6.95994e-115	1.24806	0.873	0.374	2.26337e-110	ActivateMG	trps1	9.40248e-89	0.929756	0.757	0.369	3.05769e-84	ActivateMG	trps1
ENSDARG00000104315~~fhl3b	1.75424e-128	0.934629	0.368	0.049	5.70478e-124	ActivateMG	fhl3b	2.11512e-48	0.61413	0.228	0.058	6.87838e-44	ActivateMG	fhl3b
ENSDARG00000104676~~prkd2	3.87974e-53	0.72236	0.583	0.216	1.26169e-48	ActivateMG	prkd2	6.18118e-45	0.639315	0.507	0.228	2.01012e-40	ActivateMG	prkd2
ENSDARG00000104693~~il6st	2.3579e-51	0.684884	0.712	0.308	7.66789e-47	ActivateMG	il6st	9.49593e-41	0.551197	0.58	0.289	3.08808e-36	ActivateMG	il6st
ENSDARG00000104810~~akt3a	2.43055e-143	1.32526	0.983	0.71	7.90414e-139	ActivateMG	akt3a	2.095e-190	1.28589	0.986	0.681	6.81294e-186	ActivateMG	akt3a
ENSDARG00000104845~~mipol1	8.30075e-67	0.802584	0.59	0.205	2.6994e-62	ActivateMG	mipol1	2.85844e-71	0.822141	0.502	0.185	9.29566e-67	ActivateMG	mipol1
ENSDARG00000105045~~bmpr1ab	1.17187e-63	0.789493	0.627	0.227	3.81091e-59	ActivateMG	bmpr1ab	9.33561e-51	0.727174	0.446	0.185	3.03594e-46	ActivateMG	bmpr1ab
ENSDARG00000105071~~nos1apa	6.34635e-36	0.581059	0.827	0.451	2.06383e-31	ActivateMG	nos1apa	1.30854e-71	0.739789	0.817	0.445	4.25536e-67	ActivateMG	nos1apa
ENSDARG00000105209~~ENSDARG00000105209	6.97824e-42	0.602632	0.556	0.22	2.26933e-37	ActivateMG	ENSDARG00000105209	2.70025e-33	0.54407	0.438	0.212	8.7812e-29	ActivateMG	ENSDARG00000105209
ENSDARG00000105255~~zbtb4	8.60207e-37	0.596167	0.371	0.133	2.79739e-32	ActivateMG	zbtb4	1.00131e-27	0.52865	0.38	0.186	3.25626e-23	ActivateMG	zbtb4
ENSDARG00000105301~~sox8a	1.10333e-29	0.547391	0.424	0.181	3.58804e-25	ActivateMG	sox8a	1.02705e-19	0.508851	0.335	0.185	3.33997e-15	ActivateMG	sox8a
ENSDARG00000105368~~CR383676.3	9.81547e-44	0.65299	0.866	0.492	3.19199e-39	ActivateMG	CR383676.3	1.49208e-41	0.575353	0.817	0.52	4.85224e-37	ActivateMG	CR383676.3
ENSDARG00000105670~~CT030129.1	2.60021e-162	1.06843	0.461	0.061	8.45589e-158	ActivateMG	CT030129.1	7.59566e-72	0.702165	0.284	0.063	2.47011e-67	ActivateMG	CT030129.1
ENSDARG00000106873~~LO018188.1	1.20294e-24	0.563056	0.402	0.181	3.91197e-20	ActivateMG	LO018188.1	5.69834e-43	0.63611	0.504	0.214	1.8531e-38	ActivateMG	LO018188.1
ENSDARG00000109527~~BX000363.2	2.53286e-35	0.991061	0.254	0.08	8.23687e-31	ActivateMG	BX000363.2	8.99334e-31	0.889031	0.261	0.108	2.92463e-26	ActivateMG	BX000363.2
ENSDARG00000109820~~NPAS3	1.44413e-68	0.905788	0.851	0.386	4.69632e-64	ActivateMG	NPAS3	3.37726e-89	0.88776	0.853	0.362	1.09828e-84	ActivateMG	NPAS3
ENSDARG00000112032~~HEPACAM	1.58322e-44	0.642868	0.546	0.208	5.14864e-40	ActivateMG	HEPACAM	3.17213e-37	0.598796	0.484	0.229	1.03158e-32	ActivateMG	HEPACAM
ENSDARG00000112993~~efnb3a	4.33919e-116	1.06786	0.946	0.464	1.41111e-111	ActivateMG	efnb3a	2.8051e-127	0.990149	0.918	0.404	9.12219e-123	ActivateMG	efnb3a
ENSDARG00000114067~~tspan17	1.61944e-30	0.598666	0.549	0.273	5.26642e-26	ActivateMG	tspan17	5.38194e-37	0.511656	0.543	0.267	1.75021e-32	ActivateMG	tspan17
ENSDARG00000115094~~CABZ01087415.1	2.33386e-112	0.952356	0.446	0.086	7.58972e-108	ActivateMG	CABZ01087415.1	3.44315e-63	0.71469	0.317	0.087	1.11971e-58	ActivateMG	CABZ01087415.1
ENSDARG00000115646~~CR846082.1	1.58199e-80	0.826527	0.459	0.113	5.14463e-76	ActivateMG	CR846082.1	3.61435e-61	0.806527	0.366	0.119	1.17539e-56	ActivateMG	CR846082.1
ENSDARG00000116863~~CU984579.1	1.88073e-63	0.661663	0.273	0.053	6.11615e-59	ActivateMG	CU984579.1	6.95209e-49	0.624352	0.223	0.056	2.26082e-44	ActivateMG	CU984579.1
ENSDARG00000116937~~BX927333.1	3.38869e-101	0.967404	0.354	0.06	1.102e-96	ActivateMG	BX927333.1	4.07708e-46	0.655365	0.283	0.089	1.32587e-41	ActivateMG	BX927333.1
ENSDARG00000117324~~LO018196.1	4.73854e-175	1.26575	0.595	0.104	1.54097e-170	ActivateMG	LO018196.1	7.49122e-166	1.22031	0.567	0.127	2.43614e-161	ActivateMG	LO018196.1
ENSDARG00000117777~~LO018400.1	2.2261e-116	1.28082	0.58	0.148	7.23928e-112	ActivateMG	LO018400.1	6.12092e-38	0.765197	0.324	0.134	1.99052e-33	ActivateMG	LO018400.1
ENSDARG00000001313~~g2e3	1.64209e-148	0.69252	0.226	0.018	5.34009e-144	MGPCs	g2e3	3.16536e-120	0.716663	0.239	0.034	1.02938e-115	MGPCs	g2e3
ENSDARG00000001470~~mhc1zea	6.16212e-112	0.611371	0.202	0.022	2.00392e-107	MGPCs	mhc1zea	6.87466e-139	0.739693	0.27	0.038	2.23564e-134	MGPCs	mhc1zea
ENSDARG00000001558~~kifc1	4.81621e-136	0.710935	0.277	0.036	1.56623e-131	MGPCs	kifc1	9.35034e-185	0.95442	0.306	0.034	3.04073e-180	MGPCs	kifc1
ENSDARG00000001754~~noc2l	5.98553e-71	0.558383	0.389	0.125	1.9465e-66	MGPCs	noc2l	1.4867e-87	0.648004	0.334	0.095	4.83474e-83	MGPCs	noc2l
ENSDARG00000001767~~slc29a2	4.61982e-82	0.596021	0.244	0.049	1.50237e-77	MGPCs	slc29a2	1.84384e-187	1.07464	0.369	0.055	5.99615e-183	MGPCs	slc29a2
ENSDARG00000001889~~tuba1a	1.22337e-265	1.32983	0.769	0.192	3.97841e-261	MGPCs	tuba1a	2.26646e-133	0.81733	0.798	0.346	7.37053e-129	MGPCs	tuba1a
ENSDARG00000001940~~dnajc1	2.52991e-115	0.771125	0.363	0.08	8.22727e-111	MGPCs	dnajc1	5.01945e-108	0.73393	0.349	0.09	1.63233e-103	MGPCs	dnajc1
ENSDARG00000002336~~dlc	0	2.15203	0.722	0.021	0	MGPCs	dlc	0	1.85093	0.595	0.013	0	MGPCs	dlc
ENSDARG00000002344~~tubb4b	8.48123e-121	0.814004	0.425	0.103	2.7581e-116	MGPCs	tubb4b	6.22e-91	0.79008	0.616	0.284	2.02274e-86	MGPCs	tubb4b
ENSDARG00000002403~~nusap1	1.09057e-146	0.699304	0.236	0.021	3.54655e-142	MGPCs	nusap1	1.85165e-141	0.825716	0.314	0.052	6.02158e-137	MGPCs	nusap1
ENSDARG00000002479~~ercc6l	4.74582e-160	0.76167	0.26	0.024	1.54334e-155	MGPCs	ercc6l	1.73862e-142	0.746113	0.215	0.02	5.65401e-138	MGPCs	ercc6l
ENSDARG00000002952~~smo	1.39e-122	0.825513	0.408	0.098	4.52027e-118	MGPCs	smo	1.11841e-75	0.657507	0.38	0.139	3.63708e-71	MGPCs	smo
ENSDARG00000002991~~cep135	1.13022e-104	0.587509	0.227	0.032	3.67546e-100	MGPCs	cep135	9.8363e-72	0.532804	0.161	0.027	3.19877e-67	MGPCs	cep135
ENSDARG00000003469~~neurod4	2.61799e-178	1.1649	0.605	0.157	8.51371e-174	MGPCs	neurod4	2.91216e-164	1.14271	0.542	0.152	9.47036e-160	MGPCs	neurod4
ENSDARG00000003544~~adarb1b	2.89985e-142	0.950936	0.904	0.722	9.43032e-138	MGPCs	adarb1b	1.88533e-138	0.750034	0.937	0.763	6.1311e-134	MGPCs	adarb1b
ENSDARG00000003599~~rpl3	6.78746e-60	0.604429	0.759	0.376	2.20728e-55	MGPCs	rpl3	2.2144e-93	0.704844	0.836	0.459	7.20123e-89	MGPCs	rpl3
ENSDARG00000003779~~ctnnd2b	3.24409e-224	1.1221	0.956	0.655	1.05498e-219	MGPCs	ctnnd2b	2.16137e-148	0.92538	0.921	0.701	7.02879e-144	MGPCs	ctnnd2b
ENSDARG00000003927~~cldn12	3.18035e-63	0.568624	0.342	0.111	1.03425e-58	MGPCs	cldn12	1.13615e-58	0.525227	0.382	0.156	3.69477e-54	MGPCs	cldn12
ENSDARG00000003938~~rpa1	2.69089e-236	1.10132	0.508	0.077	8.75077e-232	MGPCs	rpa1	7.17864e-146	0.870519	0.327	0.058	2.33449e-141	MGPCs	rpa1
ENSDARG00000003952~~pfn2	5.79386e-101	0.702919	0.819	0.341	1.88416e-96	MGPCs	pfn2	4.17162e-80	0.581284	0.655	0.301	1.35661e-75	MGPCs	pfn2
ENSDARG00000004049~~marcksa	9.14967e-97	0.646489	0.308	0.067	2.97547e-92	MGPCs	marcksa	4.68917e-78	0.6459	0.309	0.09	1.52492e-73	MGPCs	marcksa
ENSDARG00000004131~~rttn	3.03101e-230	1.09825	0.633	0.129	9.85686e-226	MGPCs	rttn	3.89477e-277	1.19297	0.552	0.086	1.26658e-272	MGPCs	rttn
ENSDARG00000004169~~stmn1a	4.88124e-101	0.668825	0.269	0.049	1.58738e-96	MGPCs	stmn1a	1.01434e-102	0.704475	0.273	0.056	3.29863e-98	MGPCs	stmn1a
ENSDARG00000004176~~ulk4	7.09459e-80	0.600594	0.524	0.182	2.30716e-75	MGPCs	ulk4	4.46814e-87	0.585188	0.409	0.128	1.45304e-82	MGPCs	ulk4
ENSDARG00000004232~~dlb	0	1.43376	0.548	0.058	0	MGPCs	dlb	9.13507e-134	0.859519	0.289	0.046	2.97073e-129	MGPCs	dlb
ENSDARG00000004251~~dhfr	3.74281e-217	0.902883	0.305	0.021	1.21716e-212	MGPCs	dhfr	2.23846e-69	0.506039	0.155	0.026	7.27947e-65	MGPCs	dhfr
ENSDARG00000004470~~prkcsh	5.91842e-84	0.654772	0.746	0.329	1.92467e-79	MGPCs	prkcsh	1.8199e-92	0.614079	0.682	0.289	5.91833e-88	MGPCs	prkcsh
ENSDARG00000005002~~brf1b	3.30745e-119	0.758342	0.586	0.18	1.07558e-114	MGPCs	brf1b	1.62527e-104	0.712838	0.456	0.147	5.28538e-100	MGPCs	brf1b
ENSDARG00000005058~~ncapd2	4.59911e-145	0.711382	0.276	0.033	1.49563e-140	MGPCs	ncapd2	1.59806e-165	0.809806	0.297	0.036	5.19691e-161	MGPCs	ncapd2
ENSDARG00000005098~~zgc:86764	6.5984e-129	0.637447	0.247	0.029	2.1458e-124	MGPCs	zgc:86764	1.9904e-151	0.755956	0.243	0.025	6.47276e-147	MGPCs	zgc:86764
ENSDARG00000005122~~atp2a2b	2.68568e-101	0.744155	0.755	0.316	8.73383e-97	MGPCs	atp2a2b	1.55653e-105	0.718103	0.568	0.214	5.06185e-101	MGPCs	atp2a2b
ENSDARG00000005191~~ahcy	2.41422e-138	0.832568	0.417	0.087	7.85103e-134	MGPCs	ahcy	3.26442e-103	0.667723	0.344	0.086	1.06159e-98	MGPCs	ahcy
ENSDARG00000005254~~kdelr2a	2.17098e-100	0.745897	0.52	0.169	7.06003e-96	MGPCs	kdelr2a	4.12801e-79	0.596294	0.432	0.158	1.34243e-74	MGPCs	kdelr2a
ENSDARG00000005462~~kif4	7.64351e-212	0.932548	0.409	0.051	2.48567e-207	MGPCs	kif4	2.20771e-197	0.889817	0.342	0.04	7.17948e-193	MGPCs	kif4
ENSDARG00000005993~~prc1b	3.28714e-148	0.678831	0.224	0.018	1.06898e-143	MGPCs	prc1b	9.02555e-88	0.555545	0.158	0.02	2.93511e-83	MGPCs	prc1b
ENSDARG00000006260~~tuba8l4	2.12487e-117	0.803481	0.44	0.112	6.91009e-113	MGPCs	tuba8l4	7.33584e-132	0.826939	0.504	0.15	2.38562e-127	MGPCs	tuba8l4
ENSDARG00000006601~~kaznb	0	1.54687	0.861	0.25	0	MGPCs	kaznb	6.69161e-182	1.01711	0.749	0.29	2.17611e-177	MGPCs	kaznb
ENSDARG00000006782~~rb1	3.24054e-229	1.0547	0.537	0.092	1.05382e-224	MGPCs	rb1	6.81063e-137	0.822478	0.357	0.073	2.21482e-132	MGPCs	rb1
ENSDARG00000006921~~lrp5	6.70959e-92	0.709041	0.603	0.232	2.18196e-87	MGPCs	lrp5	2.78374e-74	0.649407	0.498	0.221	9.05272e-70	MGPCs	lrp5
ENSDARG00000006963~~cse1l	1.75547e-98	0.685072	0.391	0.102	5.70878e-94	MGPCs	cse1l	9.72686e-92	0.639235	0.289	0.071	3.16318e-87	MGPCs	cse1l
ENSDARG00000007099~~cx43.4	5.14873e-173	0.947187	0.821	0.264	1.67437e-168	MGPCs	cx43.4	4.86971e-130	0.757552	0.717	0.249	1.58363e-125	MGPCs	cx43.4
ENSDARG00000007231~~ryk	3.44392e-189	0.984022	0.821	0.278	1.11996e-184	MGPCs	ryk	1.0976e-123	0.783225	0.604	0.223	3.56941e-119	MGPCs	ryk
ENSDARG00000007278~~ect2	3.04151e-246	1.5192	0.482	0.069	9.891e-242	MGPCs	ect2	7.21019e-257	1.43969	0.458	0.063	2.34475e-252	MGPCs	ect2
ENSDARG00000007315~~tmpoa	5.27855e-137	0.782651	0.422	0.088	1.71659e-132	MGPCs	tmpoa	1.80899e-84	0.611021	0.306	0.082	5.88282e-80	MGPCs	tmpoa
ENSDARG00000007369~~tcf7l1b	4.30276e-257	1.25254	0.68	0.152	1.39926e-252	MGPCs	tcf7l1b	3.99451e-189	1.04616	0.522	0.131	1.29901e-184	MGPCs	tcf7l1b
ENSDARG00000007370~~dysf	1.3253e-179	1.02029	0.616	0.158	4.30989e-175	MGPCs	dysf	7.40914e-69	0.64519	0.461	0.208	2.40945e-64	MGPCs	dysf
ENSDARG00000007377~~odc1	7.00893e-169	0.959383	0.604	0.15	2.27931e-164	MGPCs	odc1	4.83849e-156	0.836038	0.489	0.116	1.57348e-151	MGPCs	odc1
ENSDARG00000008022~~kif18a	5.33838e-302	1.18238	0.516	0.055	1.73604e-297	MGPCs	kif18a	1.27068e-223	1.01165	0.394	0.048	4.13224e-219	MGPCs	kif18a
ENSDARG00000008247~~vezf1a	0	1.73868	0.969	0.452	0	MGPCs	vezf1a	0	1.25439	0.95	0.453	0	MGPCs	vezf1a
ENSDARG00000008388~~mmp14b	5.25333e-94	0.680321	0.321	0.075	1.70838e-89	MGPCs	mmp14b	5.32216e-143	0.905476	0.485	0.139	1.73077e-138	MGPCs	mmp14b
ENSDARG00000008805~~orc3	8.37995e-157	0.832135	0.384	0.065	2.72516e-152	MGPCs	orc3	1.2054e-125	0.747255	0.261	0.041	3.91996e-121	MGPCs	orc3
ENSDARG00000009001~~pdia6	4.62681e-111	0.75376	0.561	0.178	1.50464e-106	MGPCs	pdia6	4.3263e-101	0.680879	0.509	0.178	1.40691e-96	MGPCs	pdia6
ENSDARG00000009285~~rpl15	1.57105e-63	0.609231	0.601	0.254	5.10906e-59	MGPCs	rpl15	2.70632e-118	0.840907	0.702	0.294	8.80095e-114	MGPCs	rpl15
ENSDARG00000009342~~txndc5	2.49897e-72	0.600067	0.367	0.114	8.12664e-68	MGPCs	txndc5	8.2131e-72	0.597566	0.338	0.113	2.6709e-67	MGPCs	txndc5
ENSDARG00000009942~~cdc6	3.25243e-171	0.8388	0.28	0.027	1.05769e-166	MGPCs	cdc6	4.65109e-114	0.68979	0.201	0.024	1.51254e-109	MGPCs	cdc6
ENSDARG00000010144~~plppr3a	9.55984e-305	1.27566	0.791	0.166	3.10886e-300	MGPCs	plppr3a	6.00424e-119	0.735484	0.579	0.2	1.95258e-114	MGPCs	plppr3a
ENSDARG00000010160~~rps15a	9.21421e-64	0.647644	0.611	0.263	2.99646e-59	MGPCs	rps15a	3.90871e-85	0.710554	0.709	0.351	1.27111e-80	MGPCs	rps15a
ENSDARG00000010244~~rpl22l1	1.33882e-45	0.500605	0.322	0.118	4.35384e-41	MGPCs	rpl22l1	4.3838e-72	0.576391	0.445	0.172	1.42561e-67	MGPCs	rpl22l1
ENSDARG00000010385~~sept4a	8.37784e-54	0.534824	0.387	0.144	2.72447e-49	MGPCs	sept4a	4.05802e-115	0.797458	0.339	0.08	1.31967e-110	MGPCs	sept4a
ENSDARG00000010445~~trabd	3.77323e-87	0.643762	0.342	0.089	1.22705e-82	MGPCs	trabd	2.74442e-71	0.588579	0.307	0.097	8.92485e-67	MGPCs	trabd
ENSDARG00000010516~~rpl21	1.19378e-46	0.530742	0.451	0.191	3.88217e-42	MGPCs	rpl21	2.48178e-60	0.606388	0.587	0.289	8.07074e-56	MGPCs	rpl21
ENSDARG00000010571~~ezh2	1.70088e-208	0.963431	0.635	0.136	5.53126e-204	MGPCs	ezh2	9.24943e-143	0.792915	0.492	0.127	3.00791e-138	MGPCs	ezh2
ENSDARG00000010583~~pard3ab	9.93477e-185	0.89388	0.917	0.53	3.23079e-180	MGPCs	pard3ab	1.09326e-109	0.661037	0.851	0.474	3.55527e-105	MGPCs	pard3ab
ENSDARG00000010591~~foxn4	0	2.58154	0.872	0.099	0	MGPCs	foxn4	0	2.14274	0.738	0.1	0	MGPCs	foxn4
ENSDARG00000010641~~slc20a1b	1.32649e-185	1.01212	0.746	0.224	4.31375e-181	MGPCs	slc20a1b	7.38942e-178	0.979057	0.648	0.206	2.40304e-173	MGPCs	slc20a1b
ENSDARG00000010791~~dla	0	2.45838	0.839	0.074	0	MGPCs	dla	0	1.99685	0.758	0.067	0	MGPCs	dla
ENSDARG00000010792~~cdc25b	9.77885e-257	1.10621	0.493	0.062	3.18008e-252	MGPCs	cdc25b	3.40656e-207	1.00136	0.381	0.051	1.10781e-202	MGPCs	cdc25b
ENSDARG00000010948~~kif11	2.99265e-200	1.02257	0.3	0.024	9.73211e-196	MGPCs	kif11	1.17412e-180	1.0428	0.305	0.036	3.81823e-176	MGPCs	kif11
ENSDARG00000011094~~ccna2	3.79192e-157	0.753756	0.278	0.029	1.23313e-152	MGPCs	ccna2	6.12442e-257	1.0983	0.391	0.038	1.99166e-252	MGPCs	ccna2
ENSDARG00000011201~~rplp2l	1.52205e-99	0.899704	0.722	0.296	4.9497e-95	MGPCs	rplp2l	1.3032e-116	0.842076	0.892	0.515	4.23801e-112	MGPCs	rplp2l
ENSDARG00000011235~~otx2b	6.79571e-72	0.524684	0.196	0.035	2.20997e-67	MGPCs	otx2b	6.48036e-241	1.21746	0.366	0.035	2.10741e-236	MGPCs	otx2b
ENSDARG00000011333~~arhgap33	7.94354e-165	0.921407	0.897	0.388	2.58324e-160	MGPCs	arhgap33	1.18372e-63	0.514564	0.789	0.421	3.84946e-59	MGPCs	arhgap33
ENSDARG00000011404~~fen1	2.1144e-129	0.699001	0.247	0.03	6.87605e-125	MGPCs	fen1	9.03312e-122	0.703239	0.233	0.032	2.93757e-117	MGPCs	fen1
ENSDARG00000011405~~rps9	6.16619e-71	0.677785	0.586	0.242	2.00525e-66	MGPCs	rps9	2.53212e-102	0.762525	0.851	0.494	8.23446e-98	MGPCs	rps9
ENSDARG00000012066~~dcn	2.09872e-217	1.07692	0.418	0.055	6.82503e-213	MGPCs	dcn	7.08853e-115	0.847155	0.366	0.098	2.30519e-110	MGPCs	dcn
ENSDARG00000012073~~kif15	1.94227e-187	0.903283	0.387	0.053	6.31625e-183	MGPCs	kif15	4.46766e-140	0.7841	0.282	0.042	1.45288e-135	MGPCs	kif15
ENSDARG00000012450~~vmp1	6.40186e-239	1.75533	0.798	0.287	2.08188e-234	MGPCs	vmp1	1.67333e-175	1.17345	0.749	0.303	5.44168e-171	MGPCs	vmp1
ENSDARG00000012485~~aurka	8.64479e-139	0.572396	0.167	0.007	2.81129e-134	MGPCs	aurka	4.26416e-101	0.502533	0.151	0.013	1.38671e-96	MGPCs	aurka
ENSDARG00000012519~~hcfc1b	1.33688e-108	0.722553	0.796	0.311	4.34754e-104	MGPCs	hcfc1b	2.52989e-83	0.569911	0.612	0.255	8.22721e-79	MGPCs	hcfc1b
ENSDARG00000012684~~atp2b1a	9.39771e-199	1.16919	0.787	0.258	3.05613e-194	MGPCs	atp2b1a	1.73416e-204	1.29687	0.761	0.312	5.63948e-200	MGPCs	atp2b1a
ENSDARG00000012820~~nop56	2.09576e-109	0.803738	0.507	0.154	6.81541e-105	MGPCs	nop56	2.09937e-122	0.784071	0.472	0.139	6.82714e-118	MGPCs	nop56
ENSDARG00000013005~~opcml	3.22298e-126	1.01802	0.769	0.355	1.04811e-121	MGPCs	opcml	2.2988e-126	0.889556	0.776	0.4	7.47571e-122	MGPCs	opcml
ENSDARG00000013207~~zeb1b	2.11226e-53	0.522102	0.704	0.386	6.86907e-49	MGPCs	zeb1b	6.99319e-99	0.708379	0.684	0.316	2.27418e-94	MGPCs	zeb1b
ENSDARG00000013476~~arhgef39	1.56745e-180	0.79294	0.303	0.029	5.09736e-176	MGPCs	arhgef39	6.11727e-180	0.792547	0.257	0.021	1.98934e-175	MGPCs	arhgef39
ENSDARG00000013528~~mcm9	1.37045e-157	0.798457	0.296	0.035	4.45671e-153	MGPCs	mcm9	1.63166e-146	0.728606	0.24	0.025	5.30615e-142	MGPCs	mcm9
ENSDARG00000013575~~rfx2	4.08922e-247	1.19358	0.531	0.087	1.32981e-242	MGPCs	rfx2	1.00452e-119	0.825957	0.327	0.075	3.26669e-115	MGPCs	rfx2
ENSDARG00000013670~~hyou1	3.21163e-83	0.664873	0.531	0.19	1.04442e-78	MGPCs	hyou1	3.53938e-91	0.668956	0.404	0.128	1.15101e-86	MGPCs	hyou1
ENSDARG00000013926~~slc16a9a	2.53473e-97	0.694089	0.244	0.043	8.24294e-93	MGPCs	slc16a9a	2.81525e-66	0.570782	0.203	0.049	9.15519e-62	MGPCs	slc16a9a
ENSDARG00000014013~~lbr	0	1.8244	0.876	0.165	0	MGPCs	lbr	5.96102e-297	1.42062	0.727	0.168	1.93852e-292	MGPCs	lbr
ENSDARG00000014017~~rrm1	0	1.44718	0.688	0.083	0	MGPCs	rrm1	1.60669e-298	1.23898	0.503	0.062	5.22496e-294	MGPCs	rrm1
ENSDARG00000014041~~smarcad1a	1.94388e-134	0.791625	0.374	0.072	6.3215e-130	MGPCs	smarcad1a	1.84677e-78	0.608329	0.244	0.058	6.00571e-74	MGPCs	smarcad1a
ENSDARG00000014180~~ildr2	9.97227e-56	0.583802	0.561	0.263	3.24298e-51	MGPCs	ildr2	5.53188e-86	0.708271	0.571	0.266	1.79897e-81	MGPCs	ildr2
ENSDARG00000014181~~foxp1b	1.55341e-179	1.00352	0.774	0.262	5.0517e-175	MGPCs	foxp1b	3.51079e-122	0.78383	0.645	0.264	1.14171e-117	MGPCs	foxp1b
ENSDARG00000014685~~esco2	2.60351e-118	0.615964	0.207	0.021	8.46661e-114	MGPCs	esco2	7.67737e-84	0.562172	0.183	0.029	2.49668e-79	MGPCs	esco2
ENSDARG00000014817~~ranbp1	8.61767e-91	0.605176	0.221	0.037	2.80247e-86	MGPCs	ranbp1	2.85938e-63	0.531038	0.203	0.05	9.2987e-59	MGPCs	ranbp1
ENSDARG00000014867~~rpl8	8.68221e-40	0.51963	0.577	0.292	2.82346e-35	MGPCs	rpl8	6.93152e-51	0.512884	0.723	0.421	2.25413e-46	MGPCs	rpl8
ENSDARG00000014943~~kif23	6.31107e-255	1.15955	0.44	0.048	2.05236e-250	MGPCs	kif23	3.66517e-239	1.10773	0.393	0.044	1.19191e-234	MGPCs	kif23
ENSDARG00000015449~~fut8a	1.55243e-168	0.966132	0.828	0.395	5.04849e-164	MGPCs	fut8a	4.47554e-77	0.591785	0.726	0.401	1.45545e-72	MGPCs	fut8a
ENSDARG00000015460~~racgap1	1.05314e-221	0.975526	0.38	0.04	3.42482e-217	MGPCs	racgap1	2.07543e-225	1.0091	0.35	0.035	6.74929e-221	MGPCs	racgap1
ENSDARG00000015759~~tspan7	2.22972e-271	1.16657	0.628	0.107	7.25103e-267	MGPCs	tspan7	5.08636e-263	1.17068	0.635	0.14	1.65408e-258	MGPCs	tspan7
ENSDARG00000015970~~phip	2.69213e-86	0.647597	0.615	0.235	8.75479e-82	MGPCs	phip	8.12087e-57	0.523424	0.442	0.201	2.64091e-52	MGPCs	phip
ENSDARG00000015998~~wdhd1	1.24606e-209	1.01646	0.398	0.05	4.0522e-205	MGPCs	wdhd1	6.62896e-140	0.786704	0.246	0.03	2.15574e-135	MGPCs	wdhd1
ENSDARG00000016156~~fam53b	5.17801e-149	0.894415	0.424	0.086	1.68389e-144	MGPCs	fam53b	2.36714e-100	0.726877	0.296	0.07	7.69795e-96	MGPCs	fam53b
ENSDARG00000016454~~esr2a	4.25175e-181	0.908446	0.388	0.057	1.38267e-176	MGPCs	esr2a	1.9003e-168	0.897972	0.352	0.058	6.17979e-164	MGPCs	esr2a
ENSDARG00000016484~~dkc1	4.98778e-112	0.817442	0.336	0.072	1.62202e-107	MGPCs	dkc1	6.26859e-99	0.690395	0.288	0.066	2.03855e-94	MGPCs	dkc1
ENSDARG00000016594~~haus4	1.92286e-110	0.599505	0.22	0.028	6.25313e-106	MGPCs	haus4	2.69963e-132	0.665181	0.209	0.021	8.7792e-128	MGPCs	haus4
ENSDARG00000016725~~gadd45gb.1	0	1.57091	0.549	0.057	0	MGPCs	gadd45gb.1	0	1.4091	0.614	0.096	0	MGPCs	gadd45gb.1
ENSDARG00000016830~~rimkla	1.85056e-215	1.0699	0.778	0.209	6.01803e-211	MGPCs	rimkla	6.64341e-95	0.645088	0.627	0.253	2.16044e-90	MGPCs	rimkla
ENSDARG00000016934~~ttyh2	5.52036e-103	0.67069	0.814	0.368	1.79522e-98	MGPCs	ttyh2	3.1049e-136	0.655253	0.842	0.422	1.00971e-131	MGPCs	ttyh2
ENSDARG00000016999~~lin28a	1.67649e-236	1.30256	0.415	0.048	5.45195e-232	MGPCs	lin28a	3.60622e-139	1.37052	0.325	0.064	1.17274e-134	MGPCs	lin28a
ENSDARG00000017105~~vaspb	7.79675e-107	0.721642	0.808	0.36	2.5355e-102	MGPCs	vaspb	4.3385e-75	0.551824	0.646	0.312	1.41088e-70	MGPCs	vaspb
ENSDARG00000017140~~zgc:63587	1.63838e-118	0.745766	0.558	0.172	5.32803e-114	MGPCs	zgc:63587	5.69272e-59	0.551192	0.392	0.168	1.85127e-54	MGPCs	zgc:63587
ENSDARG00000017180~~npc1	5.1255e-211	1.11144	0.621	0.142	1.66681e-206	MGPCs	npc1	1.80239e-178	1.11292	0.534	0.147	5.86138e-174	MGPCs	npc1
ENSDARG00000017311~~gpsm2	6.86909e-87	0.561106	0.34	0.083	2.23383e-82	MGPCs	gpsm2	2.6465e-112	0.667032	0.289	0.056	8.60641e-108	MGPCs	gpsm2
ENSDARG00000017397~~smarcc1a	9.20809e-67	0.568693	0.58	0.233	2.99447e-62	MGPCs	smarcc1a	1.41706e-67	0.52896	0.474	0.19	4.60827e-63	MGPCs	smarcc1a
ENSDARG00000017522~~ctdp1	2.97738e-158	1.00975	0.868	0.566	9.68243e-154	MGPCs	ctdp1	4.02126e-88	0.71743	0.775	0.502	1.30771e-83	MGPCs	ctdp1
ENSDARG00000017591~~fat1a	5.29135e-112	0.784019	0.83	0.364	1.72075e-107	MGPCs	fat1a	2.54213e-85	0.661588	0.726	0.401	8.26702e-81	MGPCs	fat1a
ENSDARG00000017676~~mmp2	4.20198e-271	1.12718	0.488	0.058	1.36648e-266	MGPCs	mmp2	8.66966e-165	0.984828	0.441	0.1	2.81937e-160	MGPCs	mmp2
ENSDARG00000017744~~smc2	7.51712e-222	0.955383	0.435	0.056	2.44457e-217	MGPCs	smc2	8.22232e-243	1.06264	0.41	0.048	2.6739e-238	MGPCs	smc2
ENSDARG00000017762~~srrt	1.78791e-96	0.698718	0.723	0.287	5.81429e-92	MGPCs	srrt	1.54152e-76	0.569117	0.533	0.217	5.01301e-72	MGPCs	srrt
ENSDARG00000018165~~depdc1a	3.1731e-153	0.832978	0.327	0.046	1.03189e-148	MGPCs	depdc1a	5.4002e-160	0.83336	0.29	0.036	1.75614e-155	MGPCs	depdc1a
ENSDARG00000018328~~rhocb	2.56757e-207	1.12073	0.607	0.144	8.34972e-203	MGPCs	rhocb	1.43891e-154	0.905011	0.47	0.122	4.67934e-150	MGPCs	rhocb
ENSDARG00000018334~~rpl35	5.83329e-77	0.733976	0.552	0.209	1.89698e-72	MGPCs	rpl35	6.24265e-67	0.683545	0.619	0.315	2.03011e-62	MGPCs	rpl35
ENSDARG00000018399~~rps6kb1a	9.44831e-250	1.29949	0.69	0.167	3.07259e-245	MGPCs	rps6kb1a	2.58347e-142	0.917785	0.488	0.138	8.40146e-138	MGPCs	rps6kb1a
ENSDARG00000018425~~ddx61	1.06345e-88	0.667185	0.747	0.314	3.45835e-84	MGPCs	ddx61	6.6164e-92	0.625614	0.627	0.26	2.15165e-87	MGPCs	ddx61
ENSDARG00000018693~~cdh2	7.35335e-163	0.670514	0.995	0.944	2.39131e-158	MGPCs	cdh2	2.72913e-106	0.522913	0.994	0.961	8.87512e-102	MGPCs	cdh2
ENSDARG00000018698~~carm1	1.11854e-130	0.798109	0.638	0.194	3.6375e-126	MGPCs	carm1	1.08706e-94	0.634925	0.458	0.151	3.53512e-90	MGPCs	carm1
ENSDARG00000019098~~cd82a	6.0408e-264	1.27023	0.873	0.254	1.96447e-259	MGPCs	cd82a	1.02819e-270	1.22344	0.859	0.299	3.34367e-266	MGPCs	cd82a
ENSDARG00000019137~~tram1	9.1895e-164	0.937649	0.549	0.134	2.98842e-159	MGPCs	tram1	4.51701e-139	0.840559	0.457	0.119	1.46893e-134	MGPCs	tram1
ENSDARG00000019181~~rpsa	9.34083e-51	0.629116	0.718	0.376	3.03764e-46	MGPCs	rpsa	1.20362e-81	0.698264	0.812	0.477	3.91417e-77	MGPCs	rpsa
ENSDARG00000019191~~sept12	2.01611e-115	0.806687	0.516	0.152	6.5564e-111	MGPCs	sept12	3.69852e-71	0.557165	0.384	0.132	1.20276e-66	MGPCs	sept12
ENSDARG00000019230~~rpl7a	3.876e-37	0.517067	0.577	0.298	1.26047e-32	MGPCs	rpl7a	1.34969e-61	0.613361	0.811	0.487	4.38918e-57	MGPCs	rpl7a
ENSDARG00000019417~~gadd45ga	0	1.58823	0.626	0.058	0	MGPCs	gadd45ga	0	1.57125	0.62	0.086	0	MGPCs	gadd45ga
ENSDARG00000019444~~ssr4	4.12249e-57	0.510057	0.41	0.151	1.34063e-52	MGPCs	ssr4	8.39659e-91	0.631946	0.446	0.148	2.73057e-86	MGPCs	ssr4
ENSDARG00000019507~~mcm5	2.14409e-144	0.856349	0.311	0.045	6.97258e-140	MGPCs	mcm5	2.82211e-142	0.855909	0.279	0.041	9.1775e-138	MGPCs	mcm5
ENSDARG00000019778~~rps6	7.92401e-72	0.666437	0.536	0.206	2.57689e-67	MGPCs	rps6	6.25845e-105	0.782098	0.769	0.366	2.03525e-100	MGPCs	rps6
ENSDARG00000019810~~nfe2l3	1.16622e-62	0.552896	0.384	0.131	3.79254e-58	MGPCs	nfe2l3	8.0241e-97	0.702638	0.425	0.133	2.60944e-92	MGPCs	nfe2l3
ENSDARG00000020079~~neil3	2.30744e-163	0.71618	0.271	0.026	7.50381e-159	MGPCs	neil3	9.26035e-146	0.714433	0.222	0.02	3.01147e-141	MGPCs	neil3
ENSDARG00000020134~~sipa1l1	8.28908e-184	1.03189	0.832	0.297	2.69561e-179	MGPCs	sipa1l1	5.51441e-89	0.711402	0.632	0.321	1.79329e-84	MGPCs	sipa1l1
ENSDARG00000020197~~rpl5a	1.53595e-84	0.67252	0.771	0.333	4.99491e-80	MGPCs	rpl5a	2.63093e-131	0.791569	0.806	0.355	8.55577e-127	MGPCs	rpl5a
ENSDARG00000020219~~dld	0	1.94835	0.668	0.022	0	MGPCs	dld	0	1.62951	0.54	0.031	0	MGPCs	dld
ENSDARG00000020289~~pif1	1.05287e-157	0.793272	0.194	0.009	3.42394e-153	MGPCs	pif1	1.05422e-116	0.714274	0.175	0.016	3.42833e-112	MGPCs	pif1
ENSDARG00000020298~~btg2	1.02264e-114	0.795327	0.265	0.042	3.32563e-110	MGPCs	btg2	3.58208e-91	0.723644	0.279	0.068	1.16489e-86	MGPCs	btg2
ENSDARG00000020504~~h3f3b.1	5.94933e-89	0.655619	0.219	0.036	1.93472e-84	MGPCs	h3f3b.1	4.87274e-152	0.894942	0.592	0.176	1.58462e-147	MGPCs	h3f3b.1
ENSDARG00000020708~~mdkb	8.04836e-207	0.990342	0.717	0.177	2.61733e-202	MGPCs	mdkb	8.18555e-160	0.872619	0.718	0.255	2.66194e-155	MGPCs	mdkb
ENSDARG00000020711~~rrm2	7.19394e-227	1.07686	0.443	0.057	2.33947e-222	MGPCs	rrm2	2.14201e-144	0.834026	0.329	0.058	6.96583e-140	MGPCs	rrm2
ENSDARG00000021086~~znf367	8.2621e-102	0.624978	0.213	0.029	2.68683e-97	MGPCs	znf367	5.29031e-77	0.517963	0.157	0.023	1.72041e-72	MGPCs	znf367
ENSDARG00000021120~~ndc1	4.44241e-251	1.05193	0.449	0.05	1.44467e-246	MGPCs	ndc1	1.06926e-205	0.968537	0.364	0.046	3.47724e-201	MGPCs	ndc1
ENSDARG00000021483~~cdc14b	6.06402e-87	0.971141	0.626	0.295	1.97202e-82	MGPCs	cdc14b	1.40804e-98	0.94454	0.529	0.219	4.57896e-94	MGPCs	cdc14b
ENSDARG00000021539~~ephb2b	5.88193e-186	0.896013	0.961	0.79	1.91281e-181	MGPCs	ephb2b	1.06941e-124	0.591172	0.958	0.834	3.47772e-120	MGPCs	ephb2b
ENSDARG00000021794~~hmmr	8.49434e-238	1.03904	0.345	0.026	2.76236e-233	MGPCs	hmmr	1.63186e-224	1.03262	0.338	0.031	5.30679e-220	MGPCs	hmmr
ENSDARG00000021838~~rps23	1.67866e-58	0.611871	0.435	0.164	5.45901e-54	MGPCs	rps23	3.29761e-50	0.575609	0.653	0.361	1.07238e-45	MGPCs	rps23
ENSDARG00000021864~~rplp1	2.58914e-75	0.855066	0.83	0.466	8.41987e-71	MGPCs	rplp1	2.84899e-107	0.768601	0.95	0.674	9.2649e-103	MGPCs	rplp1
ENSDARG00000023002~~dtl	2.80808e-274	1.13584	0.443	0.043	9.13187e-270	MGPCs	dtl	2.61881e-149	0.785969	0.259	0.031	8.51638e-145	MGPCs	dtl
ENSDARG00000023323~~ywhaqb	3.33967e-64	0.551448	0.839	0.448	1.08606e-59	MGPCs	ywhaqb	1.58754e-83	0.586826	0.736	0.384	5.16267e-79	MGPCs	ywhaqb
ENSDARG00000023330~~anp32b	1.83303e-57	0.504043	0.255	0.072	5.961e-53	MGPCs	anp32b	4.27708e-56	0.533	0.273	0.093	1.39091e-51	MGPCs	anp32b
ENSDARG00000023584~~cdc7	1.81319e-112	0.615544	0.217	0.026	5.8965e-108	MGPCs	cdc7	1.49995e-91	0.531145	0.159	0.018	4.87784e-87	MGPCs	cdc7
ENSDARG00000023933~~skila	1.89904e-172	1.04366	0.759	0.271	6.17567e-168	MGPCs	skila	8.55704e-85	0.615441	0.527	0.204	2.78275e-80	MGPCs	skila
ENSDARG00000024204~~mcm3	2.37001e-182	0.972831	0.331	0.039	7.70728e-178	MGPCs	mcm3	6.00956e-116	0.767269	0.241	0.038	1.95431e-111	MGPCs	mcm3
ENSDARG00000024365~~crlf1a	1.69315e-125	1.15761	0.468	0.126	5.50612e-121	MGPCs	crlf1a	5.00621e-69	1.14863	0.398	0.173	1.62802e-64	MGPCs	crlf1a
ENSDARG00000024488~~top2a	0	1.81161	0.616	0.081	0	MGPCs	top2a	0	1.77321	0.61	0.1	0	MGPCs	top2a
ENSDARG00000025073~~rpl18a	4.61206e-49	0.560878	0.532	0.239	1.49984e-44	MGPCs	rpl18a	3.44231e-76	0.657511	0.71	0.364	1.11944e-71	MGPCs	rpl18a
ENSDARG00000025147~~cd63	1.56662e-85	0.696592	0.389	0.118	5.09465e-81	MGPCs	cd63	1.90316e-114	0.821953	0.535	0.2	6.18909e-110	MGPCs	cd63
ENSDARG00000025641~~gli2a	7.21133e-256	1.41011	0.935	0.31	2.34512e-251	MGPCs	gli2a	3.03371e-231	1.2988	0.871	0.366	9.86563e-227	MGPCs	gli2a
ENSDARG00000026224~~fanci	3.0998e-147	0.697801	0.224	0.018	1.00805e-142	MGPCs	fanci	2.86333e-97	0.54971	0.151	0.014	9.31156e-93	MGPCs	fanci
ENSDARG00000026225~~nsd2	0	1.20871	0.671	0.103	0	MGPCs	nsd2	1.11874e-277	1.16092	0.532	0.079	3.63813e-273	MGPCs	nsd2
ENSDARG00000027041~~pcdh17	1.6506e-104	1.00222	0.734	0.328	5.36777e-100	MGPCs	pcdh17	6.0288e-112	1.51344	0.637	0.308	1.96057e-107	MGPCs	pcdh17
ENSDARG00000027065~~slc38a3a	0	2.06601	0.98	0.394	0	MGPCs	slc38a3a	0	1.39181	0.943	0.443	0	MGPCs	slc38a3a
ENSDARG00000027397~~vangl2	3.30717e-85	0.666358	0.59	0.225	1.07549e-80	MGPCs	vangl2	7.23612e-63	0.551776	0.476	0.212	2.35319e-58	MGPCs	vangl2
ENSDARG00000027552~~mapk1	2.58532e-87	0.703344	0.73	0.322	8.40745e-83	MGPCs	mapk1	1.31558e-93	0.725394	0.631	0.317	4.27828e-89	MGPCs	mapk1
ENSDARG00000027689~~pold1	3.64135e-135	0.70918	0.249	0.029	1.18417e-130	MGPCs	pold1	1.55886e-104	0.688697	0.214	0.033	5.06942e-100	MGPCs	pold1
ENSDARG00000027938~~rad18	1.47202e-245	1.2266	0.697	0.161	4.78702e-241	MGPCs	rad18	2.72372e-184	0.998143	0.553	0.141	8.85754e-180	MGPCs	rad18
ENSDARG00000028159~~tead1a	0	1.69484	0.944	0.368	0	MGPCs	tead1a	8.35776e-305	1.45526	0.838	0.324	2.71794e-300	MGPCs	tead1a
ENSDARG00000028335~~hmga1a	1.49438e-239	1.18268	0.915	0.281	4.85972e-235	MGPCs	hmga1a	4.2754e-213	1.0668	0.884	0.338	1.39036e-208	MGPCs	hmga1a
ENSDARG00000029045~~peli2	3.52964e-271	1.22754	0.761	0.186	1.14784e-266	MGPCs	peli2	8.22133e-278	1.22401	0.763	0.22	2.67358e-273	MGPCs	peli2
ENSDARG00000029058~~rbbp4	1.36138e-115	0.727614	0.347	0.071	4.42721e-111	MGPCs	rbbp4	6.15881e-79	0.601346	0.293	0.08	2.00285e-74	MGPCs	rbbp4
ENSDARG00000029150~~hsp90ab1	2.38038e-86	0.785805	0.898	0.523	7.741e-82	MGPCs	hsp90ab1	2.72681e-93	0.634625	0.959	0.713	8.86758e-89	MGPCs	hsp90ab1
ENSDARG00000029296~~nexmifb	0	1.8353	0.95	0.403	0	MGPCs	nexmifb	0	1.65959	0.903	0.462	0	MGPCs	nexmifb
ENSDARG00000029406~~h2ax	1.2773e-126	0.592484	0.151	0.006	4.15378e-122	MGPCs	h2ax	3.54911e-134	0.768505	0.307	0.052	1.15417e-129	MGPCs	h2ax
ENSDARG00000029443~~zgc:92242	2.98276e-149	0.897872	0.526	0.13	9.69993e-145	MGPCs	zgc:92242	2.94765e-121	0.774814	0.447	0.124	9.58575e-117	MGPCs	zgc:92242
ENSDARG00000029500~~rpl34	1.72816e-72	0.633706	0.805	0.39	5.61998e-68	MGPCs	rpl34	4.34924e-104	0.68868	0.838	0.436	1.41437e-99	MGPCs	rpl34
ENSDARG00000029533~~rpl18	1.58615e-58	0.605232	0.7	0.33	5.15817e-54	MGPCs	rpl18	1.1217e-101	0.724802	0.822	0.429	3.64776e-97	MGPCs	rpl18
ENSDARG00000029722~~hmgb2a	3.29484e-102	0.68992	0.603	0.194	1.07148e-97	MGPCs	hmgb2a	2.98774e-117	0.799567	0.73	0.296	9.71614e-113	MGPCs	hmgb2a
ENSDARG00000030053~~eef1db	3.68213e-88	0.659723	0.454	0.143	1.19743e-83	MGPCs	eef1db	8.01607e-93	0.695512	0.44	0.153	2.60683e-88	MGPCs	eef1db
ENSDARG00000030107~~si:ch211-207i1.2	7.64103e-151	0.852322	0.959	0.657	2.48486e-146	MGPCs	si:ch211-207i1.2	4.54847e-78	0.52415	0.883	0.55	1.47916e-73	MGPCs	si:ch211-207i1.2
ENSDARG00000030602~~rps19	4.94547e-44	0.573224	0.529	0.252	1.60827e-39	MGPCs	rps19	1.2113e-39	0.51408	0.675	0.418	3.93915e-35	MGPCs	rps19
ENSDARG00000030700~~ctps1a	3.34751e-126	0.785396	0.356	0.07	1.08861e-121	MGPCs	ctps1a	1.92062e-91	0.639546	0.269	0.061	6.24585e-87	MGPCs	ctps1a
ENSDARG00000030723~~cldn11b	3.0483e-91	0.513669	0.16	0.016	9.91307e-87	MGPCs	cldn11b	5.09857e-76	0.525599	0.154	0.023	1.65806e-71	MGPCs	cldn11b
ENSDARG00000030756~~dnmt1	3.42475e-143	0.809237	0.288	0.038	1.11373e-138	MGPCs	dnmt1	3.34493e-102	0.702213	0.218	0.035	1.08777e-97	MGPCs	dnmt1
ENSDARG00000030759~~melk	2.22298e-148	0.671487	0.234	0.02	7.22914e-144	MGPCs	melk	5.4775e-107	0.562648	0.171	0.017	1.78128e-102	MGPCs	melk
ENSDARG00000030789~~ddx18	7.87566e-50	0.509313	0.317	0.114	2.56117e-45	MGPCs	ddx18	7.2615e-65	0.555279	0.291	0.093	2.36144e-60	MGPCs	ddx18
ENSDARG00000030999~~mybl1	0	2.05638	0.867	0.119	0	MGPCs	mybl1	0	1.77528	0.809	0.136	0	MGPCs	mybl1
ENSDARG00000031435~~TXN	7.33148e-73	0.603744	0.273	0.069	2.3842e-68	MGPCs	TXN	1.21868e-96	0.718794	0.4	0.124	3.96315e-92	MGPCs	TXN
ENSDARG00000031495~~seta	4.4803e-106	0.710899	0.401	0.1	1.45699e-101	MGPCs	seta	4.24411e-73	0.618065	0.418	0.157	1.38019e-68	MGPCs	seta
ENSDARG00000031560~~srpk1b	1.76657e-112	0.708193	0.571	0.172	5.74487e-108	MGPCs	srpk1b	1.11913e-120	0.735558	0.454	0.127	3.63941e-116	MGPCs	srpk1b
ENSDARG00000031775~~ube2s	1.33841e-113	0.66994	0.264	0.041	4.35251e-109	MGPCs	ube2s	5.03942e-71	0.542299	0.247	0.064	1.63882e-66	MGPCs	ube2s
ENSDARG00000032264~~mybl2b	3.38566e-135	0.732132	0.268	0.034	1.10102e-130	MGPCs	mybl2b	4.40278e-100	0.570695	0.165	0.017	1.43178e-95	MGPCs	mybl2b
ENSDARG00000032725~~rps27a	2.79232e-37	0.535243	0.483	0.231	9.08064e-33	MGPCs	rps27a	3.14566e-71	0.690826	0.701	0.371	1.02297e-66	MGPCs	rps27a
ENSDARG00000032765~~net1	2.96248e-223	0.968881	0.373	0.038	9.63397e-219	MGPCs	net1	1.37959e-215	0.964789	0.318	0.029	4.48644e-211	MGPCs	net1
ENSDARG00000033012~~pcnt	7.46391e-102	0.700813	0.621	0.216	2.42726e-97	MGPCs	pcnt	9.0677e-103	0.654576	0.543	0.189	2.94882e-98	MGPCs	pcnt
ENSDARG00000033345~~cntln	3.44112e-154	0.887016	0.639	0.174	1.11905e-149	MGPCs	cntln	9.05389e-162	0.875959	0.528	0.132	2.94432e-157	MGPCs	cntln
ENSDARG00000033498~~rorb	1.49647e-198	1.13188	0.935	0.436	4.86651e-194	MGPCs	rorb	2.32832e-83	0.593881	0.808	0.469	7.57169e-79	MGPCs	rorb
ENSDARG00000033840~~fat3a	3.07794e-302	1.86327	0.753	0.215	1.00095e-297	MGPCs	fat3a	2.68385e-238	1.59661	0.709	0.273	8.72788e-234	MGPCs	fat3a
ENSDARG00000033852~~mad1l1	5.37383e-160	0.923219	0.719	0.229	1.74757e-155	MGPCs	mad1l1	4.18211e-148	0.848816	0.604	0.188	1.36002e-143	MGPCs	mad1l1
ENSDARG00000033901~~msi2a	1.76473e-141	1.15092	0.63	0.232	5.73891e-137	MGPCs	msi2a	2.34634e-142	1.04134	0.543	0.199	7.6303e-138	MGPCs	msi2a
ENSDARG00000034093~~dclk2a	2.86053e-150	0.875744	0.908	0.548	9.30244e-146	MGPCs	dclk2a	2.98556e-162	0.894443	0.903	0.5	9.70904e-158	MGPCs	dclk2a
ENSDARG00000034434~~igf1rb	7.0953e-128	0.809968	0.873	0.564	2.30739e-123	MGPCs	igf1rb	1.31596e-56	0.634996	0.706	0.482	4.27951e-52	MGPCs	igf1rb
ENSDARG00000034624~~nuf2	2.69e-126	0.634878	0.205	0.019	8.7479e-122	MGPCs	nuf2	1.0102e-124	0.663679	0.217	0.025	3.28518e-120	MGPCs	nuf2
ENSDARG00000034670~~ube2e2	3.30207e-163	1.00449	0.754	0.282	1.07383e-158	MGPCs	ube2e2	1.49074e-155	1.03233	0.646	0.265	4.84789e-151	MGPCs	ube2e2
ENSDARG00000034773~~ncapd3	5.9279e-125	0.687371	0.239	0.029	1.92775e-120	MGPCs	ncapd3	1.38213e-146	0.730359	0.228	0.022	4.4947e-142	MGPCs	ncapd3
ENSDARG00000034855~~ccnb3	4.11867e-182	1.03005	0.319	0.034	1.33939e-177	MGPCs	ccnb3	1.35606e-147	0.972754	0.292	0.043	4.40991e-143	MGPCs	ccnb3
ENSDARG00000035161~~pkdcca	1.0868e-105	0.732255	0.563	0.186	3.53428e-101	MGPCs	pkdcca	2.62322e-61	0.534395	0.433	0.183	8.53072e-57	MGPCs	pkdcca
ENSDARG00000035521~~sfrp1a	0	1.17209	0.431	0.03	0	MGPCs	sfrp1a	1.0197e-132	0.772777	0.244	0.032	3.31605e-128	MGPCs	sfrp1a
ENSDARG00000035682~~FP102018.1	2.72487e-53	0.531555	0.259	0.08	8.86128e-49	MGPCs	FP102018.1	1.99218e-58	0.588214	0.301	0.112	6.47856e-54	MGPCs	FP102018.1
ENSDARG00000035751~~ipo7	9.61042e-156	0.937153	0.848	0.337	3.12531e-151	MGPCs	ipo7	1.2721e-138	0.827605	0.726	0.288	4.13688e-134	MGPCs	ipo7
ENSDARG00000036036~~mdka	6.99368e-206	1.30225	0.897	0.311	2.27434e-201	MGPCs	mdka	1.03755e-118	0.775632	0.92	0.404	3.37411e-114	MGPCs	mdka
ENSDARG00000036044~~rps20	4.15489e-108	0.945593	0.841	0.489	1.35117e-103	MGPCs	rps20	7.56147e-131	0.833891	0.936	0.624	2.45899e-126	MGPCs	rps20
ENSDARG00000036080~~cd81a	5.62865e-287	1.40686	0.947	0.437	1.83044e-282	MGPCs	cd81a	8.18876e-127	0.701406	0.907	0.566	2.66298e-122	MGPCs	cd81a
ENSDARG00000036162~~hnrnpa0b	7.56401e-131	0.799549	0.616	0.18	2.45981e-126	MGPCs	hnrnpa0b	4.68524e-92	0.661873	0.618	0.257	1.52364e-87	MGPCs	hnrnpa0b
ENSDARG00000036298~~rps13	3.21956e-41	0.570928	0.385	0.166	1.047e-36	MGPCs	rps13	1.04291e-60	0.605635	0.625	0.316	3.39155e-56	MGPCs	rps13
ENSDARG00000036316~~rpl39	4.85111e-71	0.665519	0.344	0.1	1.57758e-66	MGPCs	rpl39	1.16971e-43	0.565435	0.586	0.328	3.80389e-39	MGPCs	rpl39
ENSDARG00000036629~~rps14	1.82302e-46	0.586638	0.645	0.324	5.92847e-42	MGPCs	rps14	4.40972e-79	0.672269	0.829	0.478	1.43404e-74	MGPCs	rps14
ENSDARG00000036816~~pou2f2a	0	2.67345	0.694	0.062	0	MGPCs	pou2f2a	0	2.26901	0.622	0.089	0	MGPCs	pou2f2a
ENSDARG00000036875~~rps12	1.82224e-91	0.829298	0.707	0.301	5.92592e-87	MGPCs	rps12	4.23069e-97	0.784487	0.804	0.429	1.37582e-92	MGPCs	rps12
ENSDARG00000036990~~dctd	1.48504e-222	0.946479	0.341	0.029	4.82933e-218	MGPCs	dctd	5.54115e-130	0.713429	0.224	0.026	1.80198e-125	MGPCs	dctd
ENSDARG00000037009~~banf1	2.97208e-79	0.56386	0.214	0.04	9.66522e-75	MGPCs	banf1	6.73674e-77	0.612914	0.24	0.058	2.19079e-72	MGPCs	banf1
ENSDARG00000037046~~rad51b	2.18383e-115	0.655911	0.279	0.046	7.10183e-111	MGPCs	rad51b	7.31611e-82	0.541955	0.156	0.022	2.3792e-77	MGPCs	rad51b
ENSDARG00000037178~~zic2b	0	1.61331	0.661	0.058	0	MGPCs	zic2b	2.10917e-266	1.2173	0.502	0.077	6.85901e-262	MGPCs	zic2b
ENSDARG00000037196~~arid5b	1.68992e-280	1.47193	0.932	0.532	5.49563e-276	MGPCs	arid5b	0	1.35357	0.949	0.601	0	MGPCs	arid5b
ENSDARG00000037238~~smad5	3.17328e-89	0.681343	0.334	0.086	1.03195e-84	MGPCs	smad5	3.17668e-60	0.545589	0.261	0.083	1.03306e-55	MGPCs	smad5
ENSDARG00000037318~~ddost	1.37374e-91	0.669447	0.624	0.229	4.4674e-87	MGPCs	ddost	1.05771e-111	0.746189	0.515	0.172	3.43967e-107	MGPCs	ddost
ENSDARG00000037350~~rpl9	4.08125e-75	0.605601	0.273	0.067	1.32722e-70	MGPCs	rpl9	6.22851e-80	0.747549	0.481	0.199	2.02551e-75	MGPCs	rpl9
ENSDARG00000037397~~ssrp1a	1.12025e-140	0.816837	0.429	0.092	3.64304e-136	MGPCs	ssrp1a	9.97253e-80	0.600649	0.314	0.091	3.24307e-75	MGPCs	ssrp1a
ENSDARG00000037846~~hm13	2.47751e-89	0.672462	0.382	0.106	8.05688e-85	MGPCs	hm13	9.41321e-103	0.694995	0.334	0.084	3.06118e-98	MGPCs	hm13
ENSDARG00000037960~~lrrc17	2.24142e-150	0.986798	0.327	0.051	7.28909e-146	MGPCs	lrrc17	1.76358e-107	0.710041	0.212	0.032	5.73516e-103	MGPCs	lrrc17
ENSDARG00000038066~~kpna2	8.54547e-158	1.16113	0.237	0.019	2.77899e-153	MGPCs	kpna2	1.41285e-159	1.24216	0.259	0.029	4.59457e-155	MGPCs	kpna2
ENSDARG00000038121~~si:ch211-13k12.2	3.67248e-103	0.712918	0.846	0.477	1.19429e-98	MGPCs	si:ch211-13k12.2	7.31307e-170	0.958345	0.788	0.372	2.37821e-165	MGPCs	si:ch211-13k12.2
ENSDARG00000038159~~tcf7l1a	0	1.50768	0.79	0.165	0	MGPCs	tcf7l1a	3.38527e-263	1.1769	0.684	0.161	1.10089e-258	MGPCs	tcf7l1a
ENSDARG00000038386~~ascl1a	0	1.34022	0.454	0.022	0	MGPCs	ascl1a	1.22809e-241	0.985998	0.307	0.019	3.99375e-237	MGPCs	ascl1a
ENSDARG00000038737~~phf20b	2.56007e-76	0.607778	0.533	0.196	8.32535e-72	MGPCs	phf20b	8.15511e-59	0.538409	0.408	0.168	2.65204e-54	MGPCs	phf20b
ENSDARG00000038882~~smc4	0	1.19857	0.525	0.051	0	MGPCs	smc4	3.48131e-244	1.06726	0.457	0.063	1.13212e-239	MGPCs	smc4
ENSDARG00000038941~~ppp1r1c	2.69052e-63	0.583714	0.314	0.098	8.74959e-59	MGPCs	ppp1r1c	1.02263e-86	0.722986	0.36	0.118	3.32559e-82	MGPCs	ppp1r1c
ENSDARG00000039020~~fbxo5	0	1.22972	0.54	0.055	0	MGPCs	fbxo5	1.74744e-205	0.940436	0.344	0.039	5.68267e-201	MGPCs	fbxo5
ENSDARG00000039069~~slx4ip	3.30821e-106	0.619149	0.378	0.085	1.07583e-101	MGPCs	slx4ip	1.86762e-122	0.697762	0.324	0.064	6.07349e-118	MGPCs	slx4ip
ENSDARG00000039208~~nasp	1.46961e-108	0.64847	0.214	0.027	4.77916e-104	MGPCs	nasp	2.32408e-65	0.525173	0.166	0.033	7.5579e-61	MGPCs	nasp
ENSDARG00000039429~~adka	8.27314e-180	1.038	0.867	0.362	2.69043e-175	MGPCs	adka	3.39217e-156	0.889694	0.778	0.326	1.10313e-151	MGPCs	adka
ENSDARG00000039987~~hivep2a	3.23867e-57	0.571657	0.681	0.347	1.05322e-52	MGPCs	hivep2a	1.31259e-93	0.793542	0.586	0.274	4.26854e-89	MGPCs	hivep2a
ENSDARG00000040041~~mcm4	4.95665e-188	1.02537	0.367	0.049	1.6119e-183	MGPCs	mcm4	2.68993e-132	0.816076	0.241	0.031	8.74766e-128	MGPCs	mcm4
ENSDARG00000040072~~scpep1	1.2134e-68	0.503101	0.185	0.034	3.94598e-64	MGPCs	scpep1	4.22031e-70	0.5848	0.271	0.079	1.37244e-65	MGPCs	scpep1
ENSDARG00000040110~~kif20bb	2.35203e-279	1.27685	0.478	0.053	7.6488e-275	MGPCs	kif20bb	2.95379e-235	1.14225	0.399	0.047	9.60574e-231	MGPCs	kif20bb
ENSDARG00000040245~~kpnb3	1.79968e-197	1.02047	0.567	0.121	5.85255e-193	MGPCs	kpnb3	8.06442e-162	0.919065	0.388	0.076	2.62255e-157	MGPCs	kpnb3
ENSDARG00000040452~~fam214a	6.79984e-143	0.889526	0.875	0.452	2.21131e-138	MGPCs	fam214a	1.53046e-57	0.50861	0.732	0.461	4.97707e-53	MGPCs	fam214a
ENSDARG00000040482~~osbpl3b	5.55441e-83	0.705586	0.427	0.141	1.80629e-78	MGPCs	osbpl3b	4.00396e-63	0.554813	0.334	0.121	1.30209e-58	MGPCs	osbpl3b
ENSDARG00000040623~~fosl2	0	1.628	0.794	0.197	0	MGPCs	fosl2	1.4702e-247	1.37222	0.666	0.192	4.78109e-243	MGPCs	fosl2
ENSDARG00000040917~~cbfb	7.65272e-115	0.658939	0.237	0.032	2.48867e-110	MGPCs	cbfb	6.48683e-140	0.833975	0.323	0.06	2.10952e-135	MGPCs	cbfb
ENSDARG00000040946~~olig2	0	1.35278	0.457	0.021	0	MGPCs	olig2	1.75094e-272	1.10613	0.364	0.026	5.69404e-268	MGPCs	olig2
ENSDARG00000041113~~wdr18	2.71059e-116	0.777477	0.822	0.354	8.81485e-112	MGPCs	wdr18	3.20719e-116	0.702804	0.688	0.266	1.04298e-111	MGPCs	wdr18
ENSDARG00000041299~~zgc:110796	3.61422e-82	0.638498	0.466	0.158	1.17534e-77	MGPCs	zgc:110796	1.34046e-62	0.582517	0.391	0.16	4.35917e-58	MGPCs	zgc:110796
ENSDARG00000041361~~ttk	8.49859e-199	0.889587	0.33	0.032	2.76374e-194	MGPCs	ttk	4.51418e-219	1.01879	0.347	0.036	1.46801e-214	MGPCs	ttk
ENSDARG00000041382~~si:dkey-283b15.2	5.22504e-163	1.06053	0.626	0.181	1.69918e-158	MGPCs	si:dkey-283b15.2	5.85781e-183	0.934245	0.499	0.105	1.90496e-178	MGPCs	si:dkey-283b15.2
ENSDARG00000041391~~tmed10	1.05008e-93	0.695411	0.586	0.207	3.41485e-89	MGPCs	tmed10	3.28056e-65	0.51248	0.47	0.193	1.06684e-60	MGPCs	tmed10
ENSDARG00000041411~~rad51	9.07706e-93	0.550998	0.19	0.025	2.95186e-88	MGPCs	rad51	9.96531e-85	0.526091	0.141	0.015	3.24072e-80	MGPCs	rad51
ENSDARG00000041570~~mrpl39	1.38321e-89	0.60482	0.244	0.045	4.49819e-85	MGPCs	mrpl39	8.35334e-79	0.548216	0.194	0.037	2.71651e-74	MGPCs	mrpl39
ENSDARG00000041728~~man1a2	2.49288e-143	0.777088	0.896	0.55	8.10684e-139	MGPCs	man1a2	1.26362e-77	0.541991	0.8	0.496	4.1093e-73	MGPCs	man1a2
ENSDARG00000041811~~rps25	1.14589e-37	0.505188	0.415	0.187	3.72643e-33	MGPCs	rps25	7.96102e-51	0.617117	0.632	0.345	2.58892e-46	MGPCs	rps25
ENSDARG00000041895~~cad	7.2823e-114	0.726979	0.374	0.084	2.3682e-109	MGPCs	cad	2.64162e-70	0.574975	0.244	0.065	8.59055e-66	MGPCs	cad
ENSDARG00000042094~~eef2a.1	1.87593e-80	0.601142	0.207	0.037	6.10052e-76	MGPCs	eef2a.1	2.54768e-82	0.570751	0.207	0.04	8.28505e-78	MGPCs	eef2a.1
ENSDARG00000042115~~tmem198a	1.49284e-93	0.665373	0.777	0.33	4.85473e-89	MGPCs	tmem198a	3.23012e-86	0.597763	0.712	0.334	1.05043e-81	MGPCs	tmem198a
ENSDARG00000042236~~atrx	3.56387e-130	0.637575	0.968	0.7	1.15897e-125	MGPCs	atrx	1.08476e-133	0.648665	0.963	0.661	3.52765e-129	MGPCs	atrx
ENSDARG00000042277~~efnb3b	0	1.50898	0.939	0.456	0	MGPCs	efnb3b	1.91457e-296	1.28906	0.931	0.439	6.22618e-292	MGPCs	efnb3b
ENSDARG00000042563~~mis18bp1	5.46521e-115	0.523548	0.172	0.013	1.77729e-110	MGPCs	mis18bp1	8.85782e-101	0.543842	0.163	0.016	2.88056e-96	MGPCs	mis18bp1
ENSDARG00000042566~~rps7	3.99328e-29	0.50228	0.373	0.185	1.29862e-24	MGPCs	rps7	3.01271e-59	0.610351	0.632	0.326	9.79732e-55	MGPCs	rps7
ENSDARG00000042708~~tuba8l	1.51941e-216	1.041	0.303	0.021	4.94111e-212	MGPCs	tuba8l	1.6099e-258	1.27555	0.399	0.043	5.23538e-254	MGPCs	tuba8l
ENSDARG00000042816~~mmp9	4.29641e-24	0.522501	0.142	0.05	1.39719e-19	MGPCs	mmp9	1.16101e-79	1.29685	0.307	0.095	3.77559e-75	MGPCs	mmp9
ENSDARG00000042835~~tfdp2	3.73385e-63	0.614063	0.807	0.444	1.21425e-58	MGPCs	tfdp2	4.39839e-63	0.52979	0.645	0.302	1.43036e-58	MGPCs	tfdp2
ENSDARG00000042905~~rpl10a	3.78437e-114	0.827065	0.692	0.249	1.23068e-109	MGPCs	rpl10a	3.22596e-99	0.718664	0.778	0.39	1.04908e-94	MGPCs	rpl10a
ENSDARG00000043453~~rps5	6.82586e-60	0.591712	0.48	0.187	2.21977e-55	MGPCs	rps5	5.01051e-79	0.675484	0.649	0.3	1.62942e-74	MGPCs	rps5
ENSDARG00000043509~~rpl11	6.38252e-48	0.568681	0.515	0.231	2.0756e-43	MGPCs	rpl11	5.04289e-51	0.534904	0.713	0.419	1.63995e-46	MGPCs	rpl11
ENSDARG00000043644~~vkorc1l1	3.44779e-120	0.760171	0.539	0.155	1.12122e-115	MGPCs	vkorc1l1	6.19607e-92	0.623025	0.396	0.122	2.01496e-87	MGPCs	vkorc1l1
ENSDARG00000043716~~cldn5a	1.64891e-264	1.057	0.361	0.024	5.36225e-260	MGPCs	cldn5a	2.59785e-272	1.16813	0.417	0.044	8.44819e-268	MGPCs	cldn5a
ENSDARG00000043720~~cdc45	1.91302e-140	0.710706	0.24	0.024	6.22113e-136	MGPCs	cdc45	1.70678e-114	0.670556	0.197	0.023	5.55044e-110	MGPCs	cdc45
ENSDARG00000043976~~etf1b	1.36125e-72	0.627067	0.395	0.129	4.42677e-68	MGPCs	etf1b	2.11645e-62	0.550278	0.326	0.117	6.88268e-58	MGPCs	etf1b
ENSDARG00000044135~~cenpp	1.60907e-198	0.950024	0.429	0.063	5.23269e-194	MGPCs	cenpp	8.59398e-133	0.747297	0.266	0.039	2.79476e-128	MGPCs	cenpp
ENSDARG00000044251~~rasgef1bb	1.25055e-167	0.968014	0.668	0.196	4.06678e-163	MGPCs	rasgef1bb	3.72381e-118	0.797185	0.529	0.188	1.21098e-113	MGPCs	rasgef1bb
ENSDARG00000044299~~lmnb1	2.63445e-91	0.640358	0.404	0.113	8.56724e-87	MGPCs	lmnb1	1.1554e-86	0.6069	0.319	0.086	3.75736e-82	MGPCs	lmnb1
ENSDARG00000044491~~kif20a	0	1.75505	0.517	0.049	0	MGPCs	kif20a	0	1.61591	0.505	0.057	0	MGPCs	kif20a
ENSDARG00000044521~~eef1b2	5.35815e-137	0.880444	0.499	0.125	1.74247e-132	MGPCs	eef1b2	8.928e-142	0.860451	0.638	0.22	2.90339e-137	MGPCs	eef1b2
ENSDARG00000044622~~polq	3.02298e-64	0.519337	0.257	0.067	9.83074e-60	MGPCs	polq	1.05789e-64	0.504044	0.228	0.06	3.44026e-60	MGPCs	polq
ENSDARG00000044718~~vav2	4.23053e-182	1.08144	0.62	0.171	1.37577e-177	MGPCs	vav2	4.17224e-182	1.09755	0.619	0.21	1.35681e-177	MGPCs	vav2
ENSDARG00000044807~~dck	8.24641e-124	0.677845	0.249	0.033	2.68173e-119	MGPCs	dck	4.3628e-113	0.690258	0.212	0.029	1.41878e-108	MGPCs	dck
ENSDARG00000044902~~atp2b4	7.57864e-246	1.24088	0.77	0.219	2.46458e-241	MGPCs	atp2b4	2.75924e-130	0.909143	0.608	0.257	8.97304e-126	MGPCs	atp2b4
ENSDARG00000045036~~cdc42ep4b	5.89018e-167	0.956977	0.865	0.345	1.91549e-162	MGPCs	cdc42ep4b	5.36988e-130	0.804846	0.699	0.286	1.74628e-125	MGPCs	cdc42ep4b
ENSDARG00000045105~~foxn2b	1.29276e-178	0.946479	0.437	0.077	4.20405e-174	MGPCs	foxn2b	2.49538e-97	0.713839	0.292	0.07	8.11497e-93	MGPCs	foxn2b
ENSDARG00000045145~~shisa9a	9.35237e-165	1.10826	0.439	0.087	3.04139e-160	MGPCs	shisa9a	2.28216e-263	1.32662	0.504	0.078	7.4216e-259	MGPCs	shisa9a
ENSDARG00000045167~~dlgap5	0	1.45169	0.512	0.048	0	MGPCs	dlgap5	2.48328e-293	1.3702	0.516	0.071	8.07561e-289	MGPCs	dlgap5
ENSDARG00000045308~~pola1	0	1.83763	0.798	0.13	0	MGPCs	pola1	0	1.59574	0.674	0.117	0	MGPCs	pola1
ENSDARG00000045367~~tuba1b	6.54873e-167	0.797637	0.278	0.026	2.12965e-162	MGPCs	tuba1b	5.59574e-161	0.91123	0.324	0.05	1.81973e-156	MGPCs	tuba1b
ENSDARG00000045486~~pawr	0	2.12349	0.925	0.322	0	MGPCs	pawr	1.23314e-301	1.67532	0.898	0.377	4.01016e-297	MGPCs	pawr
ENSDARG00000045605~~ticrr	2.66602e-222	0.92171	0.35	0.031	8.66991e-218	MGPCs	ticrr	9.78062e-185	0.913051	0.342	0.045	3.18066e-180	MGPCs	ticrr
ENSDARG00000045815~~mcm10	1.34626e-177	0.802486	0.264	0.021	4.37804e-173	MGPCs	mcm10	1.13641e-124	0.643823	0.177	0.014	3.69561e-120	MGPCs	mcm10
ENSDARG00000045926~~crabp1a	1.7373e-80	0.684465	0.604	0.247	5.6497e-76	MGPCs	crabp1a	7.73433e-85	0.653797	0.672	0.332	2.5152e-80	MGPCs	crabp1a
ENSDARG00000046090~~dhrs11a	9.0467e-84	0.63755	0.336	0.089	2.94199e-79	MGPCs	dhrs11a	6.18654e-96	0.737986	0.316	0.085	2.01186e-91	MGPCs	dhrs11a
ENSDARG00000046157~~RPS17	5.3038e-42	0.565402	0.345	0.14	1.7248e-37	MGPCs	RPS17	2.29694e-59	0.617176	0.649	0.342	7.46964e-55	MGPCs	RPS17
ENSDARG00000051783~~rplp0	9.84835e-133	1.02837	0.779	0.308	3.20268e-128	MGPCs	rplp0	2.50152e-123	0.900314	0.806	0.413	8.13493e-119	MGPCs	rplp0
ENSDARG00000052094~~notch1b	0	1.73381	0.931	0.421	0	MGPCs	notch1b	1.82987e-264	1.5183	0.803	0.323	5.95075e-260	MGPCs	notch1b
ENSDARG00000052131~~gli3	6.11626e-195	1.14443	0.695	0.216	1.98901e-190	MGPCs	gli3	1.7651e-130	0.898481	0.646	0.279	5.7401e-126	MGPCs	gli3
ENSDARG00000052494~~pcdh18b	2.45006e-152	0.773076	0.246	0.022	7.9676e-148	MGPCs	pcdh18b	4.61904e-137	0.760619	0.221	0.024	1.50211e-132	MGPCs	pcdh18b
ENSDARG00000052565~~cenpi	2.95459e-243	1.05097	0.449	0.053	9.60831e-239	MGPCs	cenpi	3.25449e-216	0.968314	0.365	0.041	1.05836e-211	MGPCs	cenpi
ENSDARG00000052567~~tmem35	1.13485e-236	1.13631	0.898	0.329	3.69052e-232	MGPCs	tmem35	1.48479e-195	0.953195	0.86	0.331	4.82855e-191	MGPCs	tmem35
ENSDARG00000052617~~raver1	1.38076e-227	1.11574	0.422	0.052	4.49023e-223	MGPCs	raver1	2.69842e-239	1.11733	0.346	0.031	8.77527e-235	MGPCs	raver1
ENSDARG00000052721~~prim2	0	1.81261	0.759	0.144	0	MGPCs	prim2	0	1.69917	0.658	0.109	0	MGPCs	prim2
ENSDARG00000053003~~slc35f1	0	1.68144	0.787	0.188	0	MGPCs	slc35f1	3.4642e-245	1.33779	0.611	0.142	1.12656e-240	MGPCs	slc35f1
ENSDARG00000053101~~prpf38b	1.0171e-79	0.609861	0.297	0.074	3.30762e-75	MGPCs	prpf38b	1.64599e-55	0.503084	0.223	0.066	5.35277e-51	MGPCs	prpf38b
ENSDARG00000053457~~rpl23	6.72396e-58	0.635187	0.441	0.171	2.18663e-53	MGPCs	rpl23	3.74217e-69	0.687022	0.662	0.348	1.21695e-64	MGPCs	rpl23
ENSDARG00000053463~~poglut1	1.55215e-117	0.74867	0.356	0.075	5.04758e-113	MGPCs	poglut1	2.51227e-55	0.522785	0.249	0.08	8.1699e-51	MGPCs	poglut1
ENSDARG00000053558~~rtkn2a	1.64551e-273	0.958898	0.349	0.018	5.35121e-269	MGPCs	rtkn2a	2.89359e-270	1.10441	0.362	0.026	9.40994e-266	MGPCs	rtkn2a
ENSDARG00000053666~~myb	2.52914e-151	0.98086	0.502	0.123	8.22477e-147	MGPCs	myb	7.16233e-176	1.03209	0.423	0.085	2.32919e-171	MGPCs	myb
ENSDARG00000053990~~hmgb2b	9.90914e-153	0.911557	0.404	0.073	3.22245e-148	MGPCs	hmgb2b	3.4244e-146	0.911435	0.578	0.177	1.11361e-141	MGPCs	hmgb2b
ENSDARG00000054155~~pcna	2.83685e-273	1.22717	0.544	0.076	9.22545e-269	MGPCs	pcna	2.52486e-231	1.15576	0.538	0.106	8.21085e-227	MGPCs	pcna
ENSDARG00000054224~~ipo11	1.74081e-58	0.513034	0.825	0.583	5.6611e-54	MGPCs	ipo11	4.5017e-74	0.572519	0.763	0.466	1.46395e-69	MGPCs	ipo11
ENSDARG00000054578~~arl6ip1	1.05671e-58	0.614642	0.405	0.155	3.43641e-54	MGPCs	arl6ip1	1.59122e-65	0.705797	0.469	0.229	5.17464e-61	MGPCs	arl6ip1
ENSDARG00000054818~~rpl32	4.34879e-44	0.52215	0.402	0.165	1.41423e-39	MGPCs	rpl32	1.55087e-51	0.544395	0.69	0.387	5.04342e-47	MGPCs	rpl32
ENSDARG00000054879~~six3b	1.51661e-207	1.01224	0.449	0.07	4.93201e-203	MGPCs	six3b	1.51831e-90	0.739547	0.397	0.138	4.93754e-86	MGPCs	six3b
ENSDARG00000054906~~ier5l	5.91948e-181	0.892278	0.324	0.037	1.92501e-176	MGPCs	ier5l	4.29443e-94	0.650382	0.239	0.049	1.39655e-89	MGPCs	ier5l
ENSDARG00000055113~~pom121	1.20586e-67	0.553392	0.323	0.096	3.92146e-63	MGPCs	pom121	8.78263e-74	0.554937	0.275	0.075	2.85611e-69	MGPCs	pom121
ENSDARG00000055133~~cenpf	1.10449e-240	1.57939	0.556	0.101	3.59179e-236	MGPCs	cenpf	2.1386e-259	1.60167	0.561	0.108	6.95472e-255	MGPCs	cenpf
ENSDARG00000055232~~fancc	6.82432e-177	0.817821	0.307	0.032	2.21927e-172	MGPCs	fancc	5.2911e-115	0.695741	0.206	0.026	1.72066e-110	MGPCs	fancc
ENSDARG00000055381~~bambia	4.52215e-94	0.704781	0.49	0.159	1.4706e-89	MGPCs	bambia	4.17868e-63	0.557781	0.447	0.188	1.35891e-58	MGPCs	bambia
ENSDARG00000055574~~FOXN2	1.92254e-223	1.18171	0.763	0.202	6.25211e-219	MGPCs	FOXN2	6.57314e-235	1.28432	0.691	0.197	2.13759e-230	MGPCs	FOXN2
ENSDARG00000055753~~suv39h1b	1.41962e-93	0.573583	0.198	0.027	4.61662e-89	MGPCs	suv39h1b	1.35913e-69	0.500488	0.15	0.024	4.41989e-65	MGPCs	suv39h1b
ENSDARG00000055996~~rps8a	4.76894e-67	0.653127	0.539	0.216	1.55086e-62	MGPCs	rps8a	1.19752e-106	0.813548	0.769	0.379	3.89434e-102	MGPCs	rps8a
ENSDARG00000056091~~cttnbp2nlb	1.21819e-234	1.08533	0.616	0.12	3.96157e-230	MGPCs	cttnbp2nlb	3.92958e-165	0.874041	0.455	0.099	1.2779e-160	MGPCs	cttnbp2nlb
ENSDARG00000056119~~eef1g	1.20449e-53	0.530642	0.764	0.377	3.91699e-49	MGPCs	eef1g	2.63847e-90	0.642289	0.823	0.428	8.58032e-86	MGPCs	eef1g
ENSDARG00000056156~~npdc1b	0	1.4837	0.668	0.099	0	MGPCs	npdc1b	4.13096e-264	1.46201	0.589	0.129	1.34339e-259	MGPCs	npdc1b
ENSDARG00000056483~~ssbp4	1.18944e-282	1.33843	0.944	0.498	3.86806e-278	MGPCs	ssbp4	6.57248e-229	1.02101	0.947	0.529	2.13737e-224	MGPCs	ssbp4
ENSDARG00000056619~~arhgap42a	1.31911e-140	0.831439	0.526	0.138	4.28974e-136	MGPCs	arhgap42a	3.38002e-116	0.820178	0.41	0.118	1.09918e-111	MGPCs	arhgap42a
ENSDARG00000057013~~cadm3	8.39225e-191	0.788578	0.977	0.925	2.72916e-186	MGPCs	cadm3	1.06e-166	0.680432	0.964	0.888	3.44713e-162	MGPCs	cadm3
ENSDARG00000057026~~ran	7.5049e-117	0.82841	0.517	0.148	2.44059e-112	MGPCs	ran	3.67557e-133	0.843963	0.568	0.186	1.1953e-128	MGPCs	ran
ENSDARG00000057100~~zwilch	1.26693e-126	0.641631	0.185	0.013	4.12006e-122	MGPCs	zwilch	7.82577e-92	0.565096	0.165	0.02	2.54494e-87	MGPCs	zwilch
ENSDARG00000057231~~rorca	1.55935e-59	0.559349	0.385	0.14	5.071e-55	MGPCs	rorca	5.58874e-115	0.855857	0.413	0.123	1.81746e-110	MGPCs	rorca
ENSDARG00000057323~~e2f8	6.30817e-200	0.93103	0.359	0.041	2.05142e-195	MGPCs	e2f8	1.23731e-143	0.768806	0.249	0.029	4.02373e-139	MGPCs	e2f8
ENSDARG00000057403~~CR847953.1	1.86513e-61	0.620857	0.376	0.137	6.0654e-57	MGPCs	CR847953.1	5.61975e-77	0.668717	0.381	0.14	1.82754e-72	MGPCs	CR847953.1
ENSDARG00000057683~~mcm6	2.46885e-204	1.00831	0.359	0.04	8.02871e-200	MGPCs	mcm6	2.12943e-142	0.858061	0.299	0.048	6.9249e-138	MGPCs	mcm6
ENSDARG00000057729~~ephb6	2.7051e-155	0.985425	0.948	0.473	8.79699e-151	MGPCs	ephb6	8.30861e-156	0.799963	0.962	0.606	2.70196e-151	MGPCs	ephb6
ENSDARG00000057738~~hells	1.70287e-231	1.10182	0.518	0.083	5.53773e-227	MGPCs	hells	2.17108e-195	1.04333	0.402	0.064	7.06036e-191	MGPCs	hells
ENSDARG00000057863~~dnmt3bb.3	3.5838e-91	0.579174	0.235	0.041	1.16545e-86	MGPCs	dnmt3bb.3	2.28428e-102	0.622004	0.185	0.023	7.42847e-98	MGPCs	dnmt3bb.3
ENSDARG00000057986~~ints8	9.72575e-122	0.57226	0.896	0.769	3.16281e-117	MGPCs	ints8	2.92502e-80	0.516669	0.892	0.651	9.51216e-76	MGPCs	ints8
ENSDARG00000058090~~cfap57	1.88069e-197	1.06895	0.586	0.129	6.11599e-193	MGPCs	cfap57	1.72585e-92	0.695413	0.353	0.1	5.61245e-88	MGPCs	cfap57
ENSDARG00000058105~~rpl36a	3.46101e-37	0.554834	0.458	0.219	1.12552e-32	MGPCs	rpl36a	3.73646e-50	0.603185	0.701	0.417	1.2151e-45	MGPCs	rpl36a
ENSDARG00000058128~~msna	9.27096e-187	1.01662	0.719	0.211	3.01492e-182	MGPCs	msna	6.65285e-178	0.966261	0.688	0.248	2.16351e-173	MGPCs	msna
ENSDARG00000058203~~smc1al	6.19866e-147	0.852357	0.892	0.385	2.0158e-142	MGPCs	smc1al	1.64625e-109	0.700477	0.813	0.391	5.3536e-105	MGPCs	smc1al
ENSDARG00000058212~~ndnl2	1.82095e-81	0.615039	0.285	0.067	5.92174e-77	MGPCs	ndnl2	5.6429e-69	0.533152	0.238	0.062	1.83507e-64	MGPCs	ndnl2
ENSDARG00000058259~~celsr1b	0	1.60765	0.926	0.327	0	MGPCs	celsr1b	1.28069e-186	0.975023	0.854	0.385	4.16482e-182	MGPCs	celsr1b
ENSDARG00000058322~~enc3	0	1.43815	0.68	0.11	0	MGPCs	enc3	3.58883e-121	0.874827	0.451	0.139	1.16709e-116	MGPCs	enc3
ENSDARG00000058346~~sass6	4.26777e-151	0.701652	0.228	0.018	1.38788e-146	MGPCs	sass6	2.78804e-130	0.667302	0.187	0.015	9.0667e-126	MGPCs	sass6
ENSDARG00000058369~~mex3b	0	1.52977	0.717	0.102	0	MGPCs	mex3b	5.52553e-286	1.28684	0.733	0.17	1.7969e-281	MGPCs	mex3b
ENSDARG00000058471~~plk1	5.76277e-222	0.986273	0.298	0.018	1.87405e-217	MGPCs	plk1	4.41784e-184	1.02358	0.303	0.034	1.43668e-179	MGPCs	plk1
ENSDARG00000058479~~zgc:110425	7.63845e-116	0.633529	0.244	0.033	2.48402e-111	MGPCs	zgc:110425	6.41481e-112	0.705589	0.256	0.044	2.0861e-107	MGPCs	zgc:110425
ENSDARG00000058480~~chtf18	1.1428e-123	0.659239	0.245	0.031	3.7164e-119	MGPCs	chtf18	8.46772e-79	0.520001	0.175	0.029	2.7537e-74	MGPCs	chtf18
ENSDARG00000058533~~pole	0	1.45988	0.605	0.074	0	MGPCs	pole	2.23434e-235	1.11101	0.41	0.052	7.26609e-231	MGPCs	pole
ENSDARG00000058696~~tbl1xr1a	1.49512e-192	0.706298	0.955	0.864	4.86212e-188	MGPCs	tbl1xr1a	5.04133e-116	0.562309	0.935	0.775	1.63944e-111	MGPCs	tbl1xr1a
ENSDARG00000058719~~si:dkey-119f1.1	5.51612e-140	0.805633	0.405	0.082	1.79384e-135	MGPCs	si:dkey-119f1.1	6.50933e-155	0.85423	0.325	0.052	2.11683e-150	MGPCs	si:dkey-119f1.1
ENSDARG00000059323~~rpn1	8.13737e-98	0.695904	0.569	0.193	2.64627e-93	MGPCs	rpn1	2.2619e-118	0.783888	0.495	0.159	7.3557e-114	MGPCs	rpn1
ENSDARG00000059333~~si:ch211-285f17.1	7.17706e-193	1.01627	0.492	0.092	2.33398e-188	MGPCs	si:ch211-285f17.1	6.6679e-192	1.11614	0.564	0.151	2.1684e-187	MGPCs	si:ch211-285f17.1
ENSDARG00000059707~~ENSDARG00000059707	1.89496e-196	0.955412	0.937	0.592	6.16242e-192	MGPCs	ENSDARG00000059707	1.62941e-118	0.629678	0.89	0.618	5.29883e-114	MGPCs	ENSDARG00000059707
ENSDARG00000059939~~dab1a	1.59304e-249	1.30116	0.924	0.482	5.18058e-245	MGPCs	dab1a	1.64559e-132	0.80706	0.83	0.458	5.35145e-128	MGPCs	dab1a
ENSDARG00000060041~~lig1	0	1.49688	0.69	0.097	0	MGPCs	lig1	9.70325e-301	1.31779	0.595	0.101	3.1555e-296	MGPCs	lig1
ENSDARG00000060215~~cep85	1.22901e-75	0.545084	0.266	0.063	3.99674e-71	MGPCs	cep85	4.0508e-82	0.581723	0.208	0.04	1.31732e-77	MGPCs	cep85
ENSDARG00000060243~~enox1	1.5381e-40	0.578433	0.287	0.111	5.0019e-36	MGPCs	enox1	4.15873e-89	0.944534	0.368	0.118	1.35242e-84	MGPCs	enox1
ENSDARG00000060246~~slc16a6b	5.24403e-119	0.776246	0.442	0.111	1.70536e-114	MGPCs	slc16a6b	6.71063e-85	0.60972	0.338	0.096	2.1823e-80	MGPCs	slc16a6b
ENSDARG00000060312~~wdr62	9.3625e-152	0.85634	0.311	0.043	3.04469e-147	MGPCs	wdr62	2.74044e-130	0.785134	0.259	0.039	8.91192e-126	MGPCs	wdr62
ENSDARG00000060372~~plxna2	2.3758e-262	0.885219	0.844	0.239	7.72609e-258	MGPCs	plxna2	1.25082e-172	0.621522	0.81	0.323	4.06768e-168	MGPCs	plxna2
ENSDARG00000060518~~pcsk5b	2.51826e-106	0.85219	0.698	0.322	8.18939e-102	MGPCs	pcsk5b	1.40796e-108	0.791815	0.649	0.311	4.57867e-104	MGPCs	pcsk5b
ENSDARG00000060586~~ctdspl2b	1.5845e-109	0.676585	0.291	0.053	5.15278e-105	MGPCs	ctdspl2b	8.82515e-68	0.559552	0.216	0.053	2.86994e-63	MGPCs	ctdspl2b
ENSDARG00000060768~~ankib1a	2.2191e-206	1.06199	0.729	0.203	7.2165e-202	MGPCs	ankib1a	2.26591e-91	0.657438	0.505	0.186	7.36875e-87	MGPCs	ankib1a
ENSDARG00000060917~~anln	2.02469e-169	0.879096	0.29	0.03	6.5843e-165	MGPCs	anln	1.77377e-237	1.14271	0.326	0.025	5.76831e-233	MGPCs	anln
ENSDARG00000061039~~atp10a	2.87296e-135	0.822527	0.673	0.224	9.34287e-131	MGPCs	atp10a	1.25336e-57	0.5509	0.483	0.238	4.07592e-53	MGPCs	atp10a
ENSDARG00000061187~~cbx5	1.55139e-61	0.547317	0.331	0.106	5.04511e-57	MGPCs	cbx5	4.82788e-49	0.501613	0.297	0.114	1.57003e-44	MGPCs	cbx5
ENSDARG00000061272~~BX294434.1	2.24625e-111	0.739125	0.424	0.11	7.30481e-107	MGPCs	BX294434.1	3.81233e-55	0.525457	0.281	0.099	1.23977e-50	MGPCs	BX294434.1
ENSDARG00000061468~~ncaph	1.26849e-163	0.708845	0.259	0.022	4.12511e-159	MGPCs	ncaph	2.41016e-124	0.694007	0.214	0.025	7.83783e-120	MGPCs	ncaph
ENSDARG00000061699~~sipa1l3	9.16126e-121	0.669712	0.907	0.619	2.97924e-116	MGPCs	sipa1l3	1.00034e-70	0.524174	0.819	0.528	3.25311e-66	MGPCs	sipa1l3
ENSDARG00000061794~~jam3b	0	1.28872	0.968	0.493	0	MGPCs	jam3b	1.33351e-295	1.05924	0.958	0.561	4.33657e-291	MGPCs	jam3b
ENSDARG00000061854~~lman2	1.04089e-69	0.593883	0.333	0.101	3.38499e-65	MGPCs	lman2	1.24949e-55	0.500397	0.316	0.117	4.06333e-51	MGPCs	lman2
ENSDARG00000062081~~tbc1d1	4.55193e-134	0.841915	0.497	0.132	1.48029e-129	MGPCs	tbc1d1	1.66796e-60	0.572108	0.341	0.133	5.42422e-56	MGPCs	tbc1d1
ENSDARG00000062152~~chaf1a	0	1.35107	0.664	0.091	0	MGPCs	chaf1a	0	1.31008	0.583	0.088	0	MGPCs	chaf1a
ENSDARG00000062187~~kif14	3.50693e-224	0.947237	0.34	0.028	1.14045e-219	MGPCs	kif14	6.76421e-195	0.884007	0.296	0.027	2.19972e-190	MGPCs	kif14
ENSDARG00000062268~~jarid2b	7.14027e-299	1.8223	0.955	0.52	2.32202e-294	MGPCs	jarid2b	7.00862e-251	1.4211	0.94	0.566	2.2792e-246	MGPCs	jarid2b
ENSDARG00000062346~~cacna1ea	0	2.25827	0.732	0.088	0	MGPCs	cacna1ea	0	2.11156	0.788	0.086	0	MGPCs	cacna1ea
ENSDARG00000062575~~si:ch211-210g13.5	1.87992e-53	0.541397	0.745	0.412	6.11351e-49	MGPCs	si:ch211-210g13.5	3.22686e-57	0.529286	0.65	0.377	1.04937e-52	MGPCs	si:ch211-210g13.5
ENSDARG00000062631~~npffr1l2	0	1.55855	0.68	0.081	0	MGPCs	npffr1l2	7.06587e-280	1.30134	0.558	0.09	2.29782e-275	MGPCs	npffr1l2
ENSDARG00000062801~~erfl3	1.30548e-200	1.08834	0.706	0.198	4.24542e-196	MGPCs	erfl3	2.26643e-64	0.593284	0.467	0.215	7.37045e-60	MGPCs	erfl3
ENSDARG00000062831~~si:ch73-22o12.1	1.73305e-186	1.05746	0.866	0.361	5.63589e-182	MGPCs	si:ch73-22o12.1	3.41673e-98	0.753205	0.693	0.381	1.11112e-93	MGPCs	si:ch73-22o12.1
ENSDARG00000062854~~sdk1b	3.17135e-254	1.24928	0.933	0.69	1.03132e-249	MGPCs	sdk1b	0	1.33233	0.955	0.608	0	MGPCs	sdk1b
ENSDARG00000063255~~btbd11a	0	1.48797	0.59	0.056	0	MGPCs	btbd11a	1.50075e-174	1.05877	0.458	0.105	4.88043e-170	MGPCs	btbd11a
ENSDARG00000063333~~nup210	5.61144e-105	0.700717	0.5	0.148	1.82484e-100	MGPCs	nup210	9.24911e-105	0.670886	0.367	0.096	3.00781e-100	MGPCs	nup210
ENSDARG00000063385~~cenpe	1.03414e-260	1.15635	0.396	0.034	3.36303e-256	MGPCs	cenpe	2.94899e-258	1.27633	0.429	0.052	9.59013e-254	MGPCs	cenpe
ENSDARG00000063417~~erf	9.85591e-123	0.800145	0.417	0.102	3.20514e-118	MGPCs	erf	2.96585e-70	0.618739	0.312	0.104	9.64495e-66	MGPCs	erf
ENSDARG00000063627~~bop1	8.60512e-71	0.591171	0.48	0.175	2.79838e-66	MGPCs	bop1	2.55807e-72	0.549893	0.406	0.146	8.31884e-68	MGPCs	bop1
ENSDARG00000063649~~tead3b	1.00943e-129	0.858755	0.65	0.225	3.28268e-125	MGPCs	tead3b	2.18776e-115	0.803536	0.532	0.196	7.1146e-111	MGPCs	tead3b
ENSDARG00000067805~~ggcx	1.98893e-97	0.71412	0.409	0.116	6.46799e-93	MGPCs	ggcx	3.45821e-52	0.536164	0.302	0.116	1.12461e-47	MGPCs	ggcx
ENSDARG00000068168~~hes2.2	0	1.60846	0.497	0.021	0	MGPCs	hes2.2	0	1.81698	0.515	0.014	0	MGPCs	hes2.2
ENSDARG00000068629~~cd151l	1.91377e-134	0.728576	0.286	0.041	6.22358e-130	MGPCs	cd151l	4.48474e-93	0.680585	0.25	0.053	1.45844e-88	MGPCs	cd151l
ENSDARG00000068759~~si:ch211-244o22.2	3.30126e-202	0.903312	0.337	0.033	1.07357e-197	MGPCs	si:ch211-244o22.2	1.3972e-220	0.983045	0.338	0.032	4.5437e-216	MGPCs	si:ch211-244o22.2
ENSDARG00000068787~~slc6a17	5.63078e-263	1.16174	0.406	0.038	1.83113e-258	MGPCs	slc6a17	5.37729e-111	0.776184	0.266	0.053	1.74869e-106	MGPCs	slc6a17
ENSDARG00000068965~~nrip1a	1.28928e-72	0.611276	0.625	0.268	4.19273e-68	MGPCs	nrip1a	7.97752e-78	0.607729	0.569	0.255	2.59429e-73	MGPCs	nrip1a
ENSDARG00000068993~~zgc:153631	3.47718e-229	0.918927	0.353	0.029	1.13078e-224	MGPCs	zgc:153631	2.84647e-140	0.762639	0.269	0.038	9.25673e-136	MGPCs	zgc:153631
ENSDARG00000069006~~tle3b	1.03864e-182	0.912574	0.587	0.134	3.37765e-178	MGPCs	tle3b	3.88336e-145	0.875832	0.462	0.122	1.26287e-140	MGPCs	tle3b
ENSDARG00000069326~~mus81	4.90076e-249	0.979975	0.416	0.041	1.59373e-244	MGPCs	mus81	8.02238e-188	0.863009	0.297	0.03	2.60888e-183	MGPCs	mus81
ENSDARG00000069397~~zswim8	3.67713e-139	1.1184	0.731	0.307	1.1958e-134	MGPCs	zswim8	1.99206e-108	1.05406	0.57	0.253	6.47817e-104	MGPCs	zswim8
ENSDARG00000069427~~nkain2	1.09289e-186	1.16972	0.844	0.395	3.55407e-182	MGPCs	nkain2	4.05696e-109	0.722034	0.851	0.511	1.31932e-104	MGPCs	nkain2
ENSDARG00000069430~~tp53i11a	6.91735e-176	1.00804	0.832	0.289	2.24952e-171	MGPCs	tp53i11a	1.30814e-267	1.23045	0.773	0.208	4.25408e-263	MGPCs	tp53i11a
ENSDARG00000069662~~fgf11a	2.0972e-283	1.64374	0.443	0.044	6.8201e-279	MGPCs	fgf11a	1.69202e-190	1.50496	0.386	0.069	5.50246e-186	MGPCs	fgf11a
ENSDARG00000069755~~mtmr11	3.00877e-108	0.785551	0.619	0.222	9.78453e-104	MGPCs	mtmr11	1.7331e-63	0.599723	0.468	0.222	5.63605e-59	MGPCs	mtmr11
ENSDARG00000070019~~taf15	8.46436e-64	0.530028	0.509	0.2	2.75261e-59	MGPCs	taf15	1.5946e-61	0.508272	0.44	0.182	5.18565e-57	MGPCs	taf15
ENSDARG00000070040~~zgc:162344	2.05909e-83	0.604515	0.503	0.168	6.69616e-79	MGPCs	zgc:162344	1.03935e-84	0.577248	0.36	0.107	3.37998e-80	MGPCs	zgc:162344
ENSDARG00000070108~~dek	1.62318e-107	0.661918	0.282	0.05	5.2786e-103	MGPCs	dek	5.31295e-92	0.613222	0.25	0.052	1.72777e-87	MGPCs	dek
ENSDARG00000070109~~ncapg	9.61217e-175	0.77435	0.315	0.035	3.12588e-170	MGPCs	ncapg	4.34484e-140	0.767161	0.294	0.045	1.41294e-135	MGPCs	ncapg
ENSDARG00000070141~~si:ch211-191i18.2	0	1.26619	0.466	0.039	0	MGPCs	si:ch211-191i18.2	6.4505e-205	1.14809	0.42	0.072	2.0977e-200	MGPCs	si:ch211-191i18.2
ENSDARG00000070150~~jtb	1.55645e-125	0.792493	0.338	0.065	5.06157e-121	MGPCs	jtb	5.04592e-100	0.740192	0.3	0.073	1.64093e-95	MGPCs	jtb
ENSDARG00000070228~~cdk6	0	1.66605	0.731	0.149	0	MGPCs	cdk6	0	1.5481	0.693	0.128	0	MGPCs	cdk6
ENSDARG00000070239~~knl1	1.93589e-183	0.825949	0.314	0.032	6.29552e-179	MGPCs	knl1	3.35758e-178	0.867376	0.295	0.032	1.09188e-173	MGPCs	knl1
ENSDARG00000070463~~e2f3	8.63968e-103	0.770915	0.51	0.163	2.80962e-98	MGPCs	e2f3	4.44697e-73	0.613837	0.346	0.116	1.44615e-68	MGPCs	e2f3
ENSDARG00000070545~~top1l	6.62614e-58	0.539027	0.629	0.287	2.15482e-53	MGPCs	top1l	1.44464e-60	0.520753	0.635	0.323	4.69797e-56	MGPCs	top1l
ENSDARG00000070568~~atad5a	2.71255e-228	1.01622	0.423	0.05	8.82121e-224	MGPCs	atad5a	1.21121e-171	0.893961	0.337	0.049	3.93887e-167	MGPCs	atad5a
ENSDARG00000070620~~grin2db	0	1.95662	0.748	0.06	0	MGPCs	grin2db	0	1.4722	0.559	0.083	0	MGPCs	grin2db
ENSDARG00000070656~~si:ch211-69g19.2	5.71737e-108	0.669785	0.194	0.021	1.85929e-103	MGPCs	si:ch211-69g19.2	5.25899e-94	0.730779	0.197	0.031	1.71023e-89	MGPCs	si:ch211-69g19.2
ENSDARG00000070688~~ncalda	1.38545e-114	0.749625	0.46	0.123	4.50549e-110	MGPCs	ncalda	1.25116e-73	0.612716	0.355	0.122	4.06876e-69	MGPCs	ncalda
ENSDARG00000070833~~lin52	3.07507e-117	0.673923	0.329	0.063	1.00001e-112	MGPCs	lin52	9.69221e-94	0.626999	0.263	0.057	3.15191e-89	MGPCs	lin52
ENSDARG00000070903~~met	2.18404e-199	1.07693	0.565	0.123	7.10251e-195	MGPCs	met	1.03008e-177	1.43293	0.473	0.118	3.34981e-173	MGPCs	met
ENSDARG00000070913~~sox2	5.55904e-109	0.756748	0.429	0.119	1.8078e-104	MGPCs	sox2	1.5879e-51	0.543739	0.326	0.137	5.16384e-47	MGPCs	sox2
ENSDARG00000070961~~lepr	0	2.09604	0.824	0.234	0	MGPCs	lepr	1.80936e-293	1.85778	0.709	0.224	5.88403e-289	MGPCs	lepr
ENSDARG00000071009~~kif20ba	3.18838e-288	1.18923	0.478	0.05	1.03686e-283	MGPCs	kif20ba	7.88675e-278	1.26097	0.487	0.064	2.56477e-273	MGPCs	kif20ba
ENSDARG00000071235~~si:ch211-117c9.5	3.26481e-178	0.93803	0.571	0.131	1.06172e-173	MGPCs	si:ch211-117c9.5	1.21739e-205	1.03154	0.564	0.134	3.95894e-201	MGPCs	si:ch211-117c9.5
ENSDARG00000071294~~tonsl	2.68708e-218	0.961077	0.391	0.044	8.73838e-214	MGPCs	tonsl	4.77434e-146	0.786961	0.261	0.032	1.55261e-141	MGPCs	tonsl
ENSDARG00000071524~~insrb	1.15828e-173	0.672178	0.96	0.771	3.76673e-169	MGPCs	insrb	1.00983e-66	0.500885	0.893	0.709	3.28396e-62	MGPCs	insrb
ENSDARG00000071684~~rx1	2.46956e-64	0.560946	0.525	0.214	8.031e-60	MGPCs	rx1	3.4916e-56	0.524527	0.392	0.169	1.13547e-51	MGPCs	rx1
ENSDARG00000073728~~gal3st3	0	1.9425	0.901	0.205	0	MGPCs	gal3st3	5.54784e-286	1.49606	0.793	0.234	1.80416e-281	MGPCs	gal3st3
ENSDARG00000073848~~arhgef7b	8.05345e-91	0.749287	0.745	0.343	2.61898e-86	MGPCs	arhgef7b	2.71019e-63	0.575418	0.605	0.294	8.81354e-59	MGPCs	arhgef7b
ENSDARG00000073899~~nemp1	2.80768e-166	0.810351	0.321	0.039	9.13057e-162	MGPCs	nemp1	7.84287e-156	0.781326	0.278	0.034	2.5505e-151	MGPCs	nemp1
ENSDARG00000073952~~slc4a7	6.62663e-195	1.00513	0.744	0.216	2.15498e-190	MGPCs	slc4a7	2.67289e-165	0.880173	0.636	0.194	8.69225e-161	MGPCs	slc4a7
ENSDARG00000073957~~tox3	2.68408e-227	1.22203	0.917	0.362	8.72861e-223	MGPCs	tox3	3.24871e-182	1.01004	0.846	0.419	1.05648e-177	MGPCs	tox3
ENSDARG00000074410~~brip1	0	1.30492	0.622	0.077	0	MGPCs	brip1	4.18881e-244	1.09081	0.455	0.064	1.3622e-239	MGPCs	brip1
ENSDARG00000074451~~mnd1	1.13272e-143	0.759015	0.33	0.051	3.6836e-139	MGPCs	mnd1	2.34667e-112	0.636697	0.219	0.03	7.63136e-108	MGPCs	mnd1
ENSDARG00000075211~~chd7	1.93721e-268	1.11222	0.972	0.626	6.29982e-264	MGPCs	chd7	6.46685e-256	0.966691	0.972	0.589	2.10302e-251	MGPCs	chd7
ENSDARG00000075354~~espl1	2.10261e-91	0.524085	0.203	0.029	6.83769e-87	MGPCs	espl1	3.40828e-90	0.534292	0.17	0.022	1.10837e-85	MGPCs	espl1
ENSDARG00000075369~~nck1b	6.0433e-61	0.568176	0.485	0.195	1.96528e-56	MGPCs	nck1b	4.29018e-57	0.52034	0.373	0.151	1.39517e-52	MGPCs	nck1b
ENSDARG00000075508~~si:dkey-108k21.10	4.99315e-143	0.684082	0.251	0.026	1.62377e-138	MGPCs	si:dkey-108k21.10	2.14869e-134	0.805957	0.299	0.051	6.98753e-130	MGPCs	si:dkey-108k21.10
ENSDARG00000075559~~ppm1g	7.87196e-138	0.840901	0.466	0.108	2.55996e-133	MGPCs	ppm1g	4.82951e-118	0.739196	0.412	0.109	1.57056e-113	MGPCs	ppm1g
ENSDARG00000075625~~lrig1	7.2765e-93	0.626044	0.287	0.061	2.36632e-88	MGPCs	lrig1	1.59598e-58	0.562315	0.22	0.063	5.19012e-54	MGPCs	lrig1
ENSDARG00000075673~~arhgap21b	1.17884e-104	0.684774	0.927	0.552	3.83358e-100	MGPCs	arhgap21b	3.04014e-79	0.56278	0.844	0.506	9.88654e-75	MGPCs	arhgap21b
ENSDARG00000075687~~anapc1	8.75364e-132	0.783621	0.569	0.159	2.84668e-127	MGPCs	anapc1	2.00691e-121	0.756716	0.448	0.126	6.52646e-117	MGPCs	anapc1
ENSDARG00000075725~~cep152	1.19905e-96	0.713866	0.474	0.153	3.8993e-92	MGPCs	cep152	1.84061e-71	0.639949	0.372	0.141	5.98565e-67	MGPCs	cep152
ENSDARG00000075942~~FRMD5	0	1.51861	0.952	0.682	0	MGPCs	FRMD5	0	1.48108	0.966	0.65	0	MGPCs	FRMD5
ENSDARG00000076120~~foxp4	0	1.36819	0.59	0.077	0	MGPCs	foxp4	2.12663e-228	1.15262	0.493	0.087	6.91581e-224	MGPCs	foxp4
ENSDARG00000076140~~clcf1	4.45588e-155	0.923906	0.328	0.047	1.44905e-150	MGPCs	clcf1	1.47951e-118	0.797301	0.251	0.041	4.81137e-114	MGPCs	clcf1
ENSDARG00000076228~~kif2c	2.25663e-273	1.24837	0.429	0.039	7.33856e-269	MGPCs	kif2c	1.93295e-253	1.21845	0.401	0.043	6.28594e-249	MGPCs	kif2c
ENSDARG00000076466~~maml1	6.44181e-93	0.689114	0.508	0.171	2.09488e-88	MGPCs	maml1	1.43682e-80	0.670036	0.439	0.171	4.67253e-76	MGPCs	maml1
ENSDARG00000076532~~si:ch211-222l21.1	0	1.83909	0.948	0.192	0	MGPCs	si:ch211-222l21.1	0	1.64933	0.979	0.335	0	MGPCs	si:ch211-222l21.1
ENSDARG00000076590~~atad2	5.81835e-186	0.884525	0.325	0.035	1.89213e-181	MGPCs	atad2	7.57625e-165	0.827634	0.269	0.029	2.4638e-160	MGPCs	atad2
ENSDARG00000076733~~bard1	3.12353e-211	0.987212	0.482	0.076	1.01577e-206	MGPCs	bard1	7.35583e-246	1.08174	0.449	0.059	2.39211e-241	MGPCs	bard1
ENSDARG00000076815~~eif3s10	7.14329e-69	0.584295	0.823	0.406	2.323e-64	MGPCs	eif3s10	4.17797e-93	0.602504	0.753	0.35	1.35868e-88	MGPCs	eif3s10
ENSDARG00000076913~~eme1	1.51657e-114	0.529585	0.173	0.013	4.93189e-110	MGPCs	eme1	1.01197e-130	0.618921	0.186	0.015	3.29093e-126	MGPCs	eme1
ENSDARG00000077002~~igsf3	1.96443e-176	1.02187	0.914	0.53	6.38834e-172	MGPCs	igsf3	1.43301e-265	1.22798	0.92	0.439	4.66016e-261	MGPCs	igsf3
ENSDARG00000077029~~bub1	1.95424e-179	0.75575	0.269	0.021	6.35519e-175	MGPCs	bub1	7.89494e-162	0.731729	0.215	0.014	2.56744e-157	MGPCs	bub1
ENSDARG00000077089~~blm	2.5237e-160	0.7596	0.295	0.034	8.20707e-156	MGPCs	blm	8.46512e-188	0.848955	0.277	0.024	2.75286e-183	MGPCs	blm
ENSDARG00000077174~~qsox2	2.13233e-154	0.936952	0.476	0.105	6.93434e-150	MGPCs	qsox2	1.31571e-145	1.00702	0.412	0.101	4.27868e-141	MGPCs	qsox2
ENSDARG00000077256~~nat8l	5.04816e-291	1.48852	0.724	0.157	1.64166e-286	MGPCs	nat8l	8.29064e-237	1.18407	0.706	0.191	2.69612e-232	MGPCs	nat8l
ENSDARG00000077291~~rps2	2.33959e-88	0.820449	0.766	0.364	7.60835e-84	MGPCs	rps2	4.15328e-116	0.812846	0.889	0.537	1.35065e-111	MGPCs	rps2
ENSDARG00000077473~~mych	1.08525e-111	0.675678	0.232	0.032	3.52923e-107	MGPCs	mych	5.2971e-118	0.705139	0.235	0.035	1.72262e-113	MGPCs	mych
ENSDARG00000077516~~recql4	2.4016e-105	0.649821	0.268	0.046	7.81001e-101	MGPCs	recql4	2.87345e-97	0.60163	0.204	0.031	9.34445e-93	MGPCs	recql4
ENSDARG00000077620~~cdca7a	9.99645e-83	0.510951	0.15	0.016	3.25085e-78	MGPCs	cdca7a	5.91185e-141	0.769443	0.222	0.022	1.92253e-136	MGPCs	cdca7a
ENSDARG00000077811~~sox11a	2.3436e-119	0.765363	0.57	0.168	7.62137e-115	MGPCs	sox11a	3.75943e-130	0.793655	0.552	0.174	1.22257e-125	MGPCs	sox11a
ENSDARG00000078041~~xpo1a	2.24864e-165	0.908561	0.635	0.168	7.31257e-161	MGPCs	xpo1a	2.67538e-106	0.68677	0.435	0.129	8.70032e-102	MGPCs	xpo1a
ENSDARG00000078118~~sinhcafl	1.76491e-130	0.777867	0.439	0.099	5.73947e-126	MGPCs	sinhcafl	2.35282e-112	0.731749	0.373	0.092	7.65137e-108	MGPCs	sinhcafl
ENSDARG00000078155~~inavaa	0	1.5424	0.578	0.047	0	MGPCs	inavaa	0	1.20592	0.41	0.03	0	MGPCs	inavaa
ENSDARG00000078233~~ctnnd1	8.6931e-62	0.526831	0.672	0.302	2.827e-57	MGPCs	ctnnd1	1.19484e-59	0.50427	0.556	0.265	3.88563e-55	MGPCs	ctnnd1
ENSDARG00000078310~~cecr2	8.838e-190	0.992245	0.591	0.132	2.87412e-185	MGPCs	cecr2	7.57506e-173	0.978829	0.514	0.127	2.46341e-168	MGPCs	cecr2
ENSDARG00000078313~~MYO9B	4.9944e-189	0.98756	0.706	0.2	1.62418e-184	MGPCs	MYO9B	2.68658e-110	0.745945	0.531	0.191	8.73677e-106	MGPCs	MYO9B
ENSDARG00000078523~~ddr1	4.74428e-126	1.08588	0.603	0.215	1.54284e-121	MGPCs	ddr1	7.32445e-74	0.861277	0.493	0.246	2.38191e-69	MGPCs	ddr1
ENSDARG00000078582~~myo16	1.41114e-253	1.30975	0.847	0.276	4.58904e-249	MGPCs	myo16	0	1.43175	0.768	0.203	0	MGPCs	myo16
ENSDARG00000078654~~tpx2	2.12293e-218	1.02239	0.37	0.037	6.90378e-214	MGPCs	tpx2	1.05866e-238	1.18922	0.43	0.059	3.44277e-234	MGPCs	tpx2
ENSDARG00000078759~~dna2	6.27575e-88	0.51466	0.169	0.02	2.04088e-83	MGPCs	dna2	2.16509e-104	0.620647	0.166	0.017	7.04087e-100	MGPCs	dna2
ENSDARG00000078825~~bub1ba	1.68007e-109	0.589533	0.22	0.028	5.4636e-105	MGPCs	bub1ba	1.09295e-139	0.741598	0.242	0.028	3.55427e-135	MGPCs	bub1ba
ENSDARG00000078947~~sdccag8	2.82302e-99	0.698692	0.506	0.158	9.18046e-95	MGPCs	sdccag8	2.55748e-96	0.644895	0.439	0.141	8.31692e-92	MGPCs	sdccag8
ENSDARG00000079000~~tp53bp1	2.02383e-196	0.997098	0.568	0.123	6.5815e-192	MGPCs	tp53bp1	1.4599e-135	0.871332	0.416	0.107	4.74761e-131	MGPCs	tp53bp1
ENSDARG00000079015~~brca2	2.10639e-126	0.708451	0.265	0.037	6.84998e-122	MGPCs	brca2	1.17446e-72	0.527723	0.165	0.029	3.81934e-68	MGPCs	brca2
ENSDARG00000079097~~tanc2a	8.60513e-213	1.12834	0.963	0.726	2.79839e-208	MGPCs	tanc2a	3.37517e-217	1.06187	0.974	0.72	1.09761e-212	MGPCs	tanc2a
ENSDARG00000079233~~si:ch211-160f23.5	1.45148e-113	0.705237	0.268	0.043	4.72022e-109	MGPCs	si:ch211-160f23.5	2.8261e-70	0.522629	0.17	0.031	9.19048e-66	MGPCs	si:ch211-160f23.5
ENSDARG00000079253~~plch1	0	1.88682	0.79	0.118	0	MGPCs	plch1	0	1.57674	0.72	0.129	0	MGPCs	plch1
ENSDARG00000079552~~maml3	6.55083e-125	0.811383	0.914	0.506	2.13033e-120	MGPCs	maml3	2.62264e-96	0.650884	0.825	0.447	8.52883e-92	MGPCs	maml3
ENSDARG00000079585~~pkn3	2.11585e-190	0.715957	0.238	0.011	6.88074e-186	MGPCs	pkn3	2.29928e-112	0.617981	0.2	0.024	7.47726e-108	MGPCs	pkn3
ENSDARG00000079679~~cep112	1.48334e-225	1.27688	0.709	0.194	4.82383e-221	MGPCs	cep112	4.4462e-214	1.15462	0.598	0.148	1.4459e-209	MGPCs	cep112
ENSDARG00000079900~~shroom4	4.90655e-196	1.01833	0.579	0.131	1.59561e-191	MGPCs	shroom4	6.60327e-95	0.759136	0.431	0.158	2.14738e-90	MGPCs	shroom4
ENSDARG00000079912~~rapgefl1	4.75946e-307	1.67211	0.797	0.211	1.54778e-302	MGPCs	rapgefl1	9.53335e-202	1.18133	0.693	0.259	3.10024e-197	MGPCs	rapgefl1
ENSDARG00000079915~~pot1	4.48671e-190	0.94923	0.546	0.113	1.45908e-185	MGPCs	pot1	9.80615e-144	0.804483	0.409	0.092	3.18896e-139	MGPCs	pot1
ENSDARG00000081252~~dre-mir-16b	1.9074e-100	0.58241	0.252	0.042	6.20286e-96	MGPCs	dre-mir-16b	4.73882e-76	0.544133	0.235	0.056	1.54106e-71	MGPCs	dre-mir-16b
ENSDARG00000083189~~arhgap19	1.81724e-125	0.579343	0.189	0.015	5.90968e-121	MGPCs	arhgap19	1.13293e-104	0.521422	0.155	0.013	3.68428e-100	MGPCs	arhgap19
ENSDARG00000086327~~srrm4	1.3608e-168	1.31112	0.812	0.386	4.42532e-164	MGPCs	srrm4	7.35816e-174	1.18476	0.8	0.372	2.39287e-169	MGPCs	srrm4
ENSDARG00000086471~~pkig	3.80695e-63	0.588838	0.455	0.179	1.23802e-58	MGPCs	pkig	6.64022e-88	0.711592	0.516	0.223	2.1594e-83	MGPCs	pkig
ENSDARG00000086550~~dbf4b	5.21313e-174	0.688899	0.226	0.012	1.69531e-169	MGPCs	dbf4b	1.16762e-108	0.590441	0.177	0.018	3.79709e-104	MGPCs	dbf4b
ENSDARG00000086703~~si:dkey-126g1.7	3.2892e-80	0.572131	0.224	0.044	1.06965e-75	MGPCs	si:dkey-126g1.7	9.05352e-97	0.696966	0.27	0.06	2.94421e-92	MGPCs	si:dkey-126g1.7
ENSDARG00000086840~~si:ch211-266k8.4	0	1.51664	0.633	0.051	0	MGPCs	si:ch211-266k8.4	0	1.43146	0.518	0.045	0	MGPCs	si:ch211-266k8.4
ENSDARG00000087238~~si:ch211-161h7.4	1.81838e-114	0.690447	0.287	0.049	5.91339e-110	MGPCs	si:ch211-161h7.4	5.19938e-94	0.616823	0.219	0.038	1.69084e-89	MGPCs	si:ch211-161h7.4
ENSDARG00000087247~~kcnab2a	2.9046e-178	1.0397	0.734	0.233	9.44576e-174	MGPCs	kcnab2a	1.24363e-125	0.787483	0.579	0.195	4.0443e-121	MGPCs	kcnab2a
ENSDARG00000087554~~cdk1	8.24902e-216	0.988603	0.33	0.028	2.68258e-211	MGPCs	cdk1	2.27143e-219	1.0538	0.353	0.038	7.38668e-215	MGPCs	cdk1
ENSDARG00000087646~~runx1	2.27268e-168	1.01526	0.43	0.084	7.39075e-164	MGPCs	runx1	1.72007e-169	1.03625	0.39	0.077	5.59368e-165	MGPCs	runx1
ENSDARG00000087921~~plce1	1.00265e-231	1.28689	0.846	0.284	3.26062e-227	MGPCs	plce1	1.00024e-85	0.685297	0.678	0.335	3.25279e-81	MGPCs	plce1
ENSDARG00000088123~~znf217	3.8691e-96	0.690675	0.365	0.093	1.25823e-91	MGPCs	znf217	5.74437e-59	0.519635	0.273	0.089	1.86807e-54	MGPCs	znf217
ENSDARG00000088130~~si:dkey-30c15.10	2.83704e-166	0.739902	0.271	0.025	9.22606e-162	MGPCs	si:dkey-30c15.10	3.39627e-128	0.663143	0.207	0.021	1.10447e-123	MGPCs	si:dkey-30c15.10
ENSDARG00000088178~~tp53inp2	6.85399e-166	0.707653	0.224	0.013	2.22892e-161	MGPCs	tp53inp2	7.68469e-79	0.58742	0.232	0.051	2.49906e-74	MGPCs	tp53inp2
ENSDARG00000089564~~MDFI	1.61343e-37	0.513111	0.287	0.121	5.24686e-33	MGPCs	MDFI	1.20665e-42	0.611734	0.27	0.119	3.92402e-38	MGPCs	MDFI
ENSDARG00000089862~~si:dkey-16j16.4	5.11849e-154	0.908211	0.573	0.146	1.66453e-149	MGPCs	si:dkey-16j16.4	2.81133e-109	0.766338	0.341	0.086	9.14243e-105	MGPCs	si:dkey-16j16.4
ENSDARG00000089922~~dsn1	2.87345e-151	0.762691	0.278	0.032	9.34447e-147	MGPCs	dsn1	3.30282e-141	0.725175	0.216	0.02	1.07408e-136	MGPCs	dsn1
ENSDARG00000089976~~spcs3	1.4106e-82	0.596661	0.277	0.062	4.58728e-78	MGPCs	spcs3	5.83892e-100	0.707727	0.342	0.089	1.89882e-95	MGPCs	spcs3
ENSDARG00000090337~~pprc1	2.02789e-113	0.718825	0.259	0.04	6.59471e-109	MGPCs	pprc1	6.76678e-84	0.593404	0.194	0.035	2.20056e-79	MGPCs	pprc1
ENSDARG00000090387~~onecut2	0	1.68753	0.647	0.106	0	MGPCs	onecut2	6.69856e-279	1.46941	0.65	0.138	2.17837e-274	MGPCs	onecut2
ENSDARG00000090427~~si:dkey-246i14.3	1.26297e-262	1.2611	0.729	0.168	4.10717e-258	MGPCs	si:dkey-246i14.3	1.64107e-116	0.82608	0.606	0.23	5.33676e-112	MGPCs	si:dkey-246i14.3
ENSDARG00000090697~~eif3ea	4.71181e-92	0.666403	0.757	0.312	1.53228e-87	MGPCs	eif3ea	5.37883e-78	0.556747	0.611	0.262	1.7492e-73	MGPCs	eif3ea
ENSDARG00000090785~~diaph3	1.92032e-244	1.77073	0.759	0.272	6.24488e-240	MGPCs	diaph3	0	1.97593	0.683	0.165	0	MGPCs	diaph3
ENSDARG00000090797~~fam222a	7.38762e-73	0.574497	0.646	0.261	2.40245e-68	MGPCs	fam222a	4.16213e-93	0.640968	0.497	0.181	1.35352e-88	MGPCs	fam222a
ENSDARG00000091150~~mki67	0	1.51261	0.686	0.093	0	MGPCs	mki67	0	1.6402	0.692	0.124	0	MGPCs	mki67
ENSDARG00000091271~~cenpt	5.20213e-101	0.52589	0.176	0.018	1.69173e-96	MGPCs	cenpt	6.09072e-109	0.567323	0.176	0.018	1.9807e-104	MGPCs	cenpt
ENSDARG00000091538~~zranb3	8.59328e-132	0.788599	0.355	0.066	2.79453e-127	MGPCs	zranb3	3.28376e-119	0.758372	0.305	0.061	1.06788e-114	MGPCs	zranb3
ENSDARG00000092033~~si:dkey-239h2.3	2.19196e-75	0.600769	0.234	0.05	7.12824e-71	MGPCs	si:dkey-239h2.3	1.2171e-80	0.615549	0.215	0.045	3.95802e-76	MGPCs	si:dkey-239h2.3
ENSDARG00000092115~~eif4a1a	1.92707e-52	0.534708	0.372	0.139	6.26684e-48	MGPCs	eif4a1a	1.77342e-89	0.642029	0.411	0.134	5.76715e-85	MGPCs	eif4a1a
ENSDARG00000092290~~si:dkeyp-26a9.2	4.27016e-177	0.808866	0.321	0.035	1.38866e-172	MGPCs	si:dkeyp-26a9.2	6.54978e-154	0.766291	0.266	0.03	2.12999e-149	MGPCs	si:dkeyp-26a9.2
ENSDARG00000092337~~CU467861.6	3.43529e-93	0.678027	0.323	0.078	1.11716e-88	MGPCs	CU467861.6	6.78169e-115	0.727886	0.31	0.065	2.20541e-110	MGPCs	CU467861.6
ENSDARG00000092638~~ptprua	3.34442e-307	2.28883	0.952	0.558	1.0876e-302	MGPCs	ptprua	0	2.32195	0.97	0.571	0	MGPCs	ptprua
ENSDARG00000092651~~si:dkey-57a22.11	1.51737e-118	0.561746	0.183	0.015	4.93449e-114	MGPCs	si:dkey-57a22.11	1.5154e-87	0.515632	0.152	0.017	4.9281e-83	MGPCs	si:dkey-57a22.11
ENSDARG00000092693~~tpt1	1.23971e-47	0.573109	0.471	0.204	4.03155e-43	MGPCs	tpt1	8.96487e-57	0.510203	0.617	0.31	2.91537e-52	MGPCs	tpt1
ENSDARG00000092798~~ppib	1.42175e-139	0.947851	0.778	0.328	4.62354e-135	MGPCs	ppib	1.71163e-97	0.681659	0.748	0.355	5.56622e-93	MGPCs	ppib
ENSDARG00000092807~~si:dkey-151g10.6	1.93838e-111	1.00726	0.707	0.282	6.30361e-107	MGPCs	si:dkey-151g10.6	4.17217e-99	0.793662	0.918	0.647	1.35679e-94	MGPCs	si:dkey-151g10.6
ENSDARG00000092855~~SRBD1	7.41974e-67	0.543731	0.353	0.11	2.4129e-62	MGPCs	SRBD1	2.0788e-61	0.503936	0.278	0.087	6.76025e-57	MGPCs	SRBD1
ENSDARG00000092950~~BX294379.1	2.37759e-206	0.976158	0.604	0.127	7.73192e-202	MGPCs	BX294379.1	7.52917e-137	0.743873	0.498	0.135	2.44849e-132	MGPCs	BX294379.1
ENSDARG00000094426~~her4.2	2.88291e-146	0.999834	0.461	0.109	9.37522e-142	MGPCs	her4.2	4.26282e-78	0.76169	0.387	0.145	1.38627e-73	MGPCs	her4.2
ENSDARG00000094977~~si:ch211-156j22.4	2.51883e-208	1.12743	0.272	0.015	8.19124e-204	MGPCs	si:ch211-156j22.4	7.12322e-159	1.07785	0.259	0.029	2.31647e-154	MGPCs	si:ch211-156j22.4
ENSDARG00000096554~~si:dkey-25o16.4	6.89517e-271	1.13399	0.464	0.05	2.24231e-266	MGPCs	si:dkey-25o16.4	1.8464e-284	1.24256	0.44	0.045	6.00451e-280	MGPCs	si:dkey-25o16.4
ENSDARG00000096876~~CR847984.1	7.01629e-98	0.512525	0.163	0.015	2.2817e-93	MGPCs	CR847984.1	3.42427e-121	0.65565	0.225	0.029	1.11357e-116	MGPCs	CR847984.1
ENSDARG00000096978~~CU972512.1	0	1.36048	0.595	0.065	0	MGPCs	CU972512.1	2.18368e-174	0.864892	0.293	0.033	7.10131e-170	MGPCs	CU972512.1
ENSDARG00000097082~~im:7152348	1.18264e-77	0.682271	0.367	0.108	3.84595e-73	MGPCs	im:7152348	1.41793e-182	1.02117	0.424	0.075	4.6111e-178	MGPCs	im:7152348
ENSDARG00000097102~~si:ch73-281n10.2	6.5605e-213	1.13561	0.822	0.237	2.13348e-208	MGPCs	si:ch73-281n10.2	1.26297e-156	0.901449	0.833	0.345	4.10719e-152	MGPCs	si:ch73-281n10.2
ENSDARG00000097145~~FP565432.1	8.66481e-199	0.961226	0.917	0.369	2.8178e-194	MGPCs	FP565432.1	4.30267e-105	0.641118	0.838	0.457	1.39923e-100	MGPCs	FP565432.1
ENSDARG00000097441~~CU855930.2	6.74201e-196	0.87743	0.466	0.073	2.1925e-191	MGPCs	CU855930.2	9.71191e-154	0.836658	0.41	0.084	3.15831e-149	MGPCs	CU855930.2
ENSDARG00000097452~~CU929070.5	6.54403e-112	0.628955	0.213	0.026	2.12812e-107	MGPCs	CU929070.5	4.01049e-119	0.73643	0.225	0.031	1.30421e-114	MGPCs	CU929070.5
ENSDARG00000097530~~xkr5b	1.2053e-99	0.575295	0.213	0.029	3.91962e-95	MGPCs	xkr5b	1.29239e-103	0.606167	0.175	0.019	4.20284e-99	MGPCs	xkr5b
ENSDARG00000097691~~pclaf	6.25298e-119	0.596857	0.19	0.017	2.03347e-114	MGPCs	pclaf	5.75517e-100	0.647638	0.231	0.04	1.87158e-95	MGPCs	pclaf
ENSDARG00000097750~~CR854827.3	0	1.38201	0.729	0.141	0	MGPCs	CR854827.3	2.4158e-228	1.18957	0.615	0.167	7.85619e-224	MGPCs	CR854827.3
ENSDARG00000097772~~si:ch211-185a18.2	5.20942e-185	1.03694	0.73	0.233	1.6941e-180	MGPCs	si:ch211-185a18.2	3.78944e-141	0.841246	0.558	0.176	1.23233e-136	MGPCs	si:ch211-185a18.2
ENSDARG00000098294~~col5a3a	1.13953e-107	0.659829	0.273	0.048	3.70574e-103	MGPCs	col5a3a	1.34536e-146	0.852389	0.347	0.067	4.37512e-142	MGPCs	col5a3a
ENSDARG00000098349~~hdac4	8.2468e-115	0.670109	0.915	0.71	2.68186e-110	MGPCs	hdac4	5.44723e-100	0.547942	0.911	0.766	1.77144e-95	MGPCs	hdac4
ENSDARG00000098350~~mxd3	1.94876e-145	0.843036	0.45	0.097	6.33738e-141	MGPCs	mxd3	2.57995e-113	0.708748	0.366	0.091	8.38999e-109	MGPCs	mxd3
ENSDARG00000098368~~aplp1	2.75908e-231	1.41796	0.862	0.316	8.97254e-227	MGPCs	aplp1	5.54216e-225	1.18645	0.9	0.458	1.80231e-220	MGPCs	aplp1
ENSDARG00000098529~~ccne2	6.60487e-185	1.08784	0.485	0.094	2.1479e-180	MGPCs	ccne2	2.34068e-166	0.952728	0.364	0.062	7.61188e-162	MGPCs	ccne2
ENSDARG00000098650~~iqgap3	5.98977e-222	0.961145	0.413	0.048	1.94787e-217	MGPCs	iqgap3	8.44286e-175	0.844909	0.307	0.036	2.74562e-170	MGPCs	iqgap3
ENSDARG00000098654~~FQ976914.1	3.21197e-136	0.765449	0.293	0.043	1.04453e-131	MGPCs	FQ976914.1	7.39016e-60	0.517185	0.216	0.06	2.40328e-55	MGPCs	FQ976914.1
ENSDARG00000098680~~si:zfos-2326c3.2	1.52047e-131	0.812467	0.387	0.082	4.94456e-127	MGPCs	si:zfos-2326c3.2	2.2081e-89	0.697669	0.305	0.084	7.18074e-85	MGPCs	si:zfos-2326c3.2
ENSDARG00000098897~~pds5b	2.60912e-76	0.595859	0.715	0.308	8.48486e-72	MGPCs	pds5b	5.55977e-88	0.59352	0.574	0.228	1.80804e-83	MGPCs	pds5b
ENSDARG00000098954~~stard13b	0	3.23374	0.889	0.165	0	MGPCs	stard13b	0	2.60128	0.924	0.24	0	MGPCs	stard13b
ENSDARG00000099093~~dock1	6.04306e-216	1.24803	0.88	0.47	1.9652e-211	MGPCs	dock1	1.33688e-168	0.947924	0.83	0.513	4.34754e-164	MGPCs	dock1
ENSDARG00000099144~~igfbp3	8.41085e-260	1.35831	0.696	0.15	2.73521e-255	MGPCs	igfbp3	4.34344e-134	0.96066	0.59	0.215	1.41249e-129	MGPCs	igfbp3
ENSDARG00000099194~~CABZ01058261.1	4.82382e-218	0.991305	0.424	0.053	1.56871e-213	MGPCs	CABZ01058261.1	2.24802e-239	1.10662	0.42	0.053	7.31055e-235	MGPCs	CABZ01058261.1
ENSDARG00000099351~~igfbp1a	1.25208e-195	1.11799	0.579	0.137	4.07176e-191	MGPCs	igfbp1a	4.21638e-252	1.46219	0.61	0.155	1.37117e-247	MGPCs	igfbp1a
ENSDARG00000099380~~rpl13	1.35479e-51	0.59778	0.602	0.282	4.40577e-47	MGPCs	rpl13	2.53696e-47	0.514531	0.772	0.474	8.25019e-43	MGPCs	rpl13
ENSDARG00000099449~~atrxl	2.93401e-89	0.637395	0.493	0.158	9.54142e-85	MGPCs	atrxl	8.3089e-75	0.574296	0.438	0.161	2.70205e-70	MGPCs	atrxl
ENSDARG00000099555~~foxo1a	1.9147e-120	0.873658	0.823	0.387	6.2266e-116	MGPCs	foxo1a	1.46554e-107	0.76554	0.704	0.349	4.76593e-103	MGPCs	foxo1a
ENSDARG00000099572~~hmgn2	6.66684e-230	1.11881	0.921	0.293	2.16806e-225	MGPCs	hmgn2	3.16935e-266	1.27145	0.948	0.427	1.03067e-261	MGPCs	hmgn2
ENSDARG00000099724~~relt	9.42691e-152	0.799015	0.339	0.051	3.06563e-147	MGPCs	relt	9.67176e-136	0.785419	0.285	0.046	3.14526e-131	MGPCs	relt
ENSDARG00000100019~~arhgap11a	1.83161e-158	0.729	0.256	0.023	5.95641e-154	MGPCs	arhgap11a	2.72668e-154	0.721529	0.214	0.016	8.86716e-150	MGPCs	arhgap11a
ENSDARG00000100056~~CABZ01088109.1	1.6281e-55	0.512453	0.759	0.376	5.29457e-51	MGPCs	CABZ01088109.1	3.21267e-67	0.511266	0.611	0.284	1.04476e-62	MGPCs	CABZ01088109.1
ENSDARG00000100371~~eef2b	8.64508e-98	0.782241	0.834	0.401	2.81138e-93	MGPCs	eef2b	2.50792e-144	0.817258	0.877	0.429	8.15574e-140	MGPCs	eef2b
ENSDARG00000100392~~rps18	2.81885e-56	0.61562	0.624	0.286	9.16692e-52	MGPCs	rps18	1.47169e-74	0.604075	0.804	0.432	4.78594e-70	MGPCs	rps18
ENSDARG00000100558~~slbp	1.06005e-119	0.646641	0.18	0.014	3.44727e-115	MGPCs	slbp	3.08473e-108	0.631986	0.175	0.018	1.00316e-103	MGPCs	slbp
ENSDARG00000100573~~ckap2l	1.77555e-164	0.743174	0.252	0.02	5.7741e-160	MGPCs	ckap2l	1.08055e-132	0.664774	0.212	0.021	3.51394e-128	MGPCs	ckap2l
ENSDARG00000100588~~rpl36	1.922e-54	0.58843	0.537	0.236	6.25036e-50	MGPCs	rpl36	1.87401e-90	0.693789	0.759	0.371	6.09427e-86	MGPCs	rpl36
ENSDARG00000100729~~tln1	6.23106e-149	0.933964	0.686	0.242	2.02634e-144	MGPCs	tln1	4.3935e-102	0.752518	0.57	0.25	1.42877e-97	MGPCs	tln1
ENSDARG00000100741~~cdc20	7.75384e-116	0.682953	0.204	0.021	2.52155e-111	MGPCs	cdc20	1.10658e-97	0.642758	0.213	0.035	3.5986e-93	MGPCs	cdc20
ENSDARG00000100918~~prc1a	2.85015e-166	0.803085	0.257	0.021	9.26869e-162	MGPCs	prc1a	7.75868e-152	0.771943	0.248	0.026	2.52312e-147	MGPCs	prc1a
ENSDARG00000101289~~slc29a1a	0	1.48197	0.815	0.124	0	MGPCs	slc29a1a	0	1.40027	0.724	0.12	0	MGPCs	slc29a1a
ENSDARG00000101362~~mibp	2.39169e-229	0.966905	0.378	0.036	7.77777e-225	MGPCs	mibp	3.33932e-115	0.673066	0.237	0.035	1.08595e-110	MGPCs	mibp
ENSDARG00000101624~~lmnb2	2.20906e-75	0.603207	0.777	0.332	7.18387e-71	MGPCs	lmnb2	5.76017e-76	0.53635	0.703	0.297	1.87321e-71	MGPCs	lmnb2
ENSDARG00000101637~~ccnd1	0	2.10726	0.948	0.227	0	MGPCs	ccnd1	1.30289e-305	1.41529	0.862	0.257	4.237e-301	MGPCs	ccnd1
ENSDARG00000101652~~haus6	8.03626e-99	0.533342	0.192	0.023	2.61339e-94	MGPCs	haus6	2.1193e-154	0.728509	0.209	0.015	6.89196e-150	MGPCs	haus6
ENSDARG00000101670~~kntc1	0	1.33373	0.667	0.095	0	MGPCs	kntc1	3.1899e-297	1.31156	0.534	0.075	1.03736e-292	MGPCs	kntc1
ENSDARG00000101813~~nap1l1	1.99865e-173	0.983048	0.696	0.203	6.49963e-169	MGPCs	nap1l1	4.51646e-149	0.881118	0.577	0.179	1.46875e-144	MGPCs	nap1l1
ENSDARG00000101891~~arid1ab	8.49298e-101	0.667585	0.931	0.523	2.76192e-96	MGPCs	arid1ab	1.27285e-98	0.635592	0.884	0.476	4.13931e-94	MGPCs	arid1ab
ENSDARG00000101949~~numbl	1.56519e-95	0.78422	0.815	0.467	5.08999e-91	MGPCs	numbl	6.88456e-76	0.582853	0.688	0.312	2.23886e-71	MGPCs	numbl
ENSDARG00000102068~~shcbp1	1.13335e-116	0.574839	0.192	0.017	3.68565e-112	MGPCs	shcbp1	4.4483e-130	0.619767	0.196	0.017	1.44659e-125	MGPCs	shcbp1
ENSDARG00000102184~~mib1	9.39516e-142	0.868293	0.906	0.466	3.05531e-137	MGPCs	mib1	2.2351e-150	0.842939	0.844	0.385	7.26854e-146	MGPCs	mib1
ENSDARG00000102191~~CPNE8	6.13539e-64	0.638629	0.365	0.127	1.99523e-59	MGPCs	CPNE8	5.69107e-73	0.710809	0.386	0.156	1.85074e-68	MGPCs	CPNE8
[truncated: 2,892 more rows]

## Sheet: tab2
Peak	Gene	PtoG_cor	Index_Peak_new	LD::Log2FC	LD::FDR	LD::MeanDiff	LD::celltype	NMDA::Log2FC	NMDA::FDR	NMDA::MeanDiff	NMDA::celltype
chr1:10378439-10378939	dachb	0.8274536125145	dachb::TSS	2.23545	2.07379e-05	0.244179	MG	0.486263	0.0990891	0.0821824	MG
chr1:10392526-10393026	dachb	0.732592219379926	dachb::Body	2.87986	0.0277716	0.0540449	MG	4.33622	0.00372641	0.0874563	MG
chr1:10406608-10407108	dachb	0.850404670271305	dachb::Body	4.08111	9.96721e-09	0.414288	MG	2.12857	5.67258e-07	0.174497	MG
chr1:11825466-11825966	ttyh3b	0.615822982480616	ttyh3b::Body	2.21731	8.34172e-06	0.271273	MG	0.503246	0.149168	0.0563677	MG
chr1:11831782-11832282	ttyh3b	0.571786880152174	ttyh3b::Body	0.886461	0.180053	0.072566	MG	1.5743	0.00324861	0.171897	MG
chr1:11832304-11832804	ttyh3b	0.685496710062946	ttyh3b::Body	0.92368	0.230663	0.046091	MG	0.489063	0.204013	0.0341445	MG
chr1:17226394-17226894	fat1a	0.396154219555151	fat1a::Inter	4.26967	0.0014313	0.106265	MG	4.2824	0.00674674	0.0372167	MG
chr1:17404753-17405253	fat1a	0.516740397718857	fat1a::Body	2.09634	0.00894014	0.101491	MG	1.74183	0.000262818	0.127013	MG
chr1:17786806-17787306	sorbs2a	0.697224609981177	sorbs2a::Body	3.49009	0.222056	0.0206376	MG	3.68902	0.0526789	0.0668042	MG
chr1:17827236-17827736	sorbs2a	0.832657221181615	sorbs2a::Inter	6.28036	1.24634e-08	0.301102	MG	4.70593	1.84005e-10	0.290515	MG
chr1:18854753-18855253	limch1a	0.628178044825834	limch1a::Inter	2.11869	2.22787e-07	0.254172	MG	3.18134	2.61986e-11	0.437068	MG
chr1:18965577-18966077	limch1a	0.84038811633088	limch1a::TSS	1.34189	0.0468414	0.0936813	MG	1.00521	0.0176998	0.0930672	MG
chr1:18982490-18982990	limch1a	0.53314496540849	limch1a::Body	3.31753	0.0691769	0.0783	MG	1.97589	0.0578481	0.0418412	MG
chr1:20634973-20635473	spock3	0.715232298220214	spock3::TSS	1.09429	0.0754685	0.146972	MG	2.07355	0.00191834	0.164758	MG
chr1:20649274-20649774	spock3	0.803828504504285	spock3::Body	2.66997	0.000795206	0.125252	MG	3.89588	1.7498e-06	0.129957	MG
chr1:20659750-20660250	spock3	0.633089353440665	spock3::Body	3.15382	0.0690714	0.0502011	MG	2.19692	0.266429	0.0394132	MG
chr1:20812969-20813469	tll1	0.472022623995413	tll1::Body	3.6718	0.0202323	0.070683	MG	1.77391	0.0495507	0.0875215	MG
chr1:20928589-20929089	msmo1	0.629759297661354	msmo1::TSS	0.492114	0.15091	0.164962	MG	0.574477	0.236048	0.145994	MG
chr1:23655773-23656273	slit2	0.594374711656451	slit2::Inter	3.06115	0.0180921	0.0919525	MG	4.13008	0.0386526	0.0332856	MG
chr1:23783489-23783989	slit2	0.896692434023875	slit2::Body	1.80068	6.48159e-05	0.199939	MG	1.73493	2.06871e-06	0.231631	MG
chr1:23784181-23784681	slit2	0.857204396709366	slit2::Body	2.9434	3.65538e-05	0.178474	MG	2.46469	0.00070504	0.155617	MG
chr1:23784749-23785249	slit2	0.677532257702645	slit2::TSS	3.24481	0.00124508	0.0631473	MG	1.39076	0.191378	0.0559207	MG
chr1:23813845-23814345	slit2	0.808785438645388	slit2::Body	1.13263	0.00239302	0.107376	MG	3.41165	2.56264e-06	0.19895	MG
chr1:23814448-23814948	slit2	0.680989624617875	slit2::Body	1.51685	0.198245	0.0271034	MG	1.33327	0.234027	0.0251546	MG
chr1:24029053-24029553	slit2	0.751689166630353	slit2::Inter	3.4684	6.90942e-11	0.406717	MG	2.90738	4.64876e-17	0.473485	MG
chr1:2508990-2509490	gpc6a	0.676760544815048	gpc6a::Inter	4.78516	8.96618e-11	0.365205	MG	2.73014	5.28091e-13	0.229763	MG
chr1:2509872-2510372	gpc6a	0.485853171124556	gpc6a::Inter	2.22044	0.186959	0.0489005	MG	0.687098	0.0169427	0.0266716	MG
chr1:2529169-2529669	gpc6a	0.579292936008647	gpc6a::Inter	5.31078	0.00534072	0.0780084	MG	3.42373	0.000976747	0.0857315	MG
chr1:2712621-2713121	gpc6a	0.49948460488211	gpc6a::TSS	1.77404	0.227162	0.10639	MG	1.85535	0.00983953	0.110121	MG
chr1:2955683-2956183	gpc6a	0.569387580167057	gpc6a::Body	5.72442	0.00135811	0.10458	MG	2.28638	0.0386526	0.0368883	MG
chr1:31540372-31540872	cnnm2b	0.836974178783554	cnnm2b::Inter	1.96802	0.0661799	0.0985324	MG	1.9172	1.00422e-05	0.158055	MG
chr1:31724854-31725354	cnnm2b	0.700246387177131	cnnm2b::TSS	0.627478	0.126671	0.0657351	MG	1.28225	0.0160876	0.17421	MG
chr1:31741745-31742245	cnnm2b	0.682226641385165	cnnm2b::Body	3.38236	0.000955256	0.0908878	MG	1.84567	0.0182573	0.0502294	MG
chr1:31742381-31742881	cnnm2b	0.906617894372975	cnnm2b::Body	3.36331	1.41601e-07	0.291586	MG	3.52954	1.57097e-10	0.356219	MG
chr1:32337034-32337534	nlgn4xa	0.492176028370556	nlgn4xa::Inter	4.02135	7.7444e-05	0.164766	MG	3.44395	5.82688e-08	0.242209	MG
chr1:32522609-32523109	nlgn4xa	0.602951837490157	nlgn4xa::Body	1.50045	0.0335856	0.0684614	MG	1.54891	0.0495507	0.0509688	MG
chr1:32644684-32645184	nlgn4xa	0.468697563707013	nlgn4xa::Body	2.6197	0.00360031	0.205289	MG	2.22831	5.85972e-05	0.219582	MG
chr1:33365598-33366098	cd99	0.784153989501268	cd99::Body	3.0586	0.00630726	0.139022	MG	3.35238	3.98931e-07	0.188442	MG
chr1:33379247-33379747	cd99	0.702099803389362	cd99::Body	3.08115	0.0211575	0.0832718	MG	1.39851	0.157067	0.0391283	MG
chr1:34423766-34424266	lmo7b	0.707220936183006	lmo7b::Body	5.28521	0.00837584	0.0766022	MG	3.41961	0.0789556	0.0557202	MG
chr1:34426767-34427267	lmo7b	0.89714238180395	lmo7b::Body	6.20372	2.02417e-05	0.146585	MG	3.12962	4.21027e-06	0.193387	MG
chr1:34428763-34429263	lmo7b	0.861877385891513	lmo7b::Body	3.54874	0.000115072	0.17888	MG	5.01804	2.24349e-05	0.148461	MG
chr1:34465709-34466209	lmo7b	0.666453632805936	lmo7b::Inter	3.44645	0.000199514	0.167551	MG	2.21447	7.40546e-05	0.155414	MG
chr1:34496525-34497025	klf12a	0.728094187622342	klf12a::TSS	1.6019	4.82573e-08	0.54103	MG	1.17945	8.98382e-06	0.300337	MG
chr1:34543899-34544399	klf12a	0.836650048466241	klf12a::Body	2.66531	1.55079e-05	0.186217	MG	2.15387	7.30749e-06	0.155851	MG
chr1:34549835-34550335	klf12a	0.656306503158592	klf12a::Body	2.45406	0.270299	0.0256885	MG	1.90743	0.266429	0.037461	MG
chr1:35479690-35480190	gab1	0.520472601404305	gab1::Inter	3.05357	0.13956	0.0461714	MG	5.11571	0.00170999	0.0678878	MG
chr1:35511318-35511818	gab1	0.720481448619024	gab1::Body	2.21773	0.00225908	0.185134	MG	0.880449	0.0857591	0.0820389	MG
chr1:35928758-35929258	smad1	0.788307604593502	smad1::TSS	2.54939	4.78484e-05	0.28936	MG	1.6854	1.18389e-05	0.236046	MG
chr1:36128746-36129246	smad1	0.629270706355031	smad1::Inter	3.36827	0.0007356	0.198952	MG	1.43738	0.132369	0.0800582	MG
chr1:36612410-36612910	ednraa	0.601658976057257	ednraa::TSS	3.27738	0.0949443	0.041809	MG	4.40275	0.00581207	0.0778655	MG
chr1:36665244-36665744	ednraa	0.813354557176272	ednraa::TSS	2.16878	3.02085e-05	0.284188	MG	1.01935	0.000238752	0.133991	MG
chr1:36697940-36698440	ednraa	0.764330249166316	ednraa::Body	3.03603	0.0204262	0.0630266	MG	3.15798	0.00184909	0.0634497	MG
chr1:36785711-36786211	ednraa	0.65137492763008	ednraa::Inter;nr3c2::Inter	2.66752	0.198245	0.0996729	MG	4.1734	0.000185171	0.106257	MG
chr1:36785711-36786211	nr3c2	0.65137492763008	ednraa::Inter;nr3c2::Inter	2.66752	0.198245	0.0996729	MG	4.1734	0.000185171	0.106257	MG
chr1:36869871-36870371	nr3c2	0.571379958377155	nr3c2::Inter	2.69258	0.270299	0.0534959	MG	3.54999	0.00304567	0.0982604	MG
chr1:36970567-36971067	nr3c2	0.652747542944365	nr3c2::Body	0.891643	3.94936e-06	0.207687	MG	0.938169	0.00159926	0.202519	MG
chr1:37065272-37065772	nr3c2	0.629394421122232	nr3c2::Body	2.31825	0.0707673	0.0583361	MG	4.17867	0.0220951	0.0548379	MG
chr1:37068825-37069325	nr3c2	0.557904407582952	nr3c2::Body	2.12362	0.270476	0.0272902	MG	0.909342	0.259326	0.0352071	MG
chr1:37072959-37073459	nr3c2	0.63452588921943	nr3c2::Body	2.56219	0.0314738	0.0677195	MG	2.07754	0.0428599	0.104833	MG
chr1:41210323-41210823	rgs12b	0.711757280257335	rgs12b::Body	2.28436	0.0043139	0.164182	MG	0.904669	0.047228	0.0299487	MG
chr1:41212548-41213048	rgs12b	0.912527257292938	rgs12b::Body	3.00573	4.04212e-13	0.441394	MG	3.35332	3.88218e-15	0.477846	MG
chr1:41216571-41217071	rgs12b	0.573206237029391	rgs12b::Body	1.79203	0.0476972	0.0512498	MG	4.55048	0.0058294	0.0783833	MG
chr1:41259351-41259851	rgs12b	0.687746121507072	rgs12b::TSS	2.16563	0.146833	0.0346476	MG	4.06898	0.000946537	0.0636305	MG
chr1:41260124-41260624	rgs12b	0.898924110501338	rgs12b::TSS	1.9296	1.71246e-08	0.450102	MG	2.07725	3.00099e-11	0.327274	MG
chr1:41276686-41277186	rgs12b	0.708961542574921	rgs12b::Body	4.80839	0.0202367	0.0544759	MG	2.73046	0.0386526	0.0517461	MG
chr1:41796737-41797237	rnf24	0.768683390455173	rnf24::Body	3.52168	0.00603192	0.15049	MG	3.42021	2.0756e-06	0.17627	MG
chr1:41797408-41797908	rnf24	0.667259989448682	rnf24::Body	2.44661	0.265202	0.0435179	MG	2.87636	0.00456786	0.0603572	MG
chr1:41819903-41820403	rnf24	0.59587618057398	rnf24::Inter	1.54368	0.000482706	0.20703	MG	2.1753	1.55384e-06	0.237585	MG
chr1:41841006-41841506	rnf24	0.766817537185069	rnf24::Inter	2.10312	0.000310826	0.165141	MG	3.62418	5.76875e-05	0.160348	MG
chr1:41843658-41844158	rnf24	0.715928031907925	rnf24::Inter	3.29772	0.000311651	0.176639	MG	2.79452	4.6124e-06	0.187386	MG
chr1:47161790-47162290	mhc1zba	0.715997444201478	mhc1zba::TSS	1.07863	0.02011	0.178388	MG	1.65904	0.000359812	0.238913	MG
chr1:47379831-47380331	mhc1zba	0.633875280827697	mhc1zba::Inter	1.40024	0.0190094	0.108481	MG	1.49555	0.0389271	0.108334	MG
chr1:47382870-47383370	mhc1zba	0.724937855710323	mhc1zba::Inter	1.52318	0.0952861	0.0619351	MG	2.39655	0.000660322	0.118375	MG
chr1:48983038-48983538	cxcl18b	0.500660014524051	cxcl18b::Inter	5.13521	0.0707912	0.068839	MG	4.90005	0.00170999	0.0581816	MG
chr1:49098956-49099456	cxcl18b	0.528042744329195	cxcl18b::Inter	2.84288	0.0310977	0.0790852	MG	3.73919	7.58226e-05	0.132313	MG
chr1:49225608-49226108	cxcl18b	0.838817970496644	cxcl18b::TSS	2.84421	6.41991e-10	0.326711	MG	3.25533	5.86426e-12	0.383563	MG
chr1:49243754-49244254	cxcl18b	0.640220757601523	cxcl18b::Inter	1.619	0.270299	0.0399082	MG	1.94889	0.0386526	0.0450752	MG
chr1:49384426-49384926	cxcl18b	0.325201818795134	cxcl18b::Inter	0.704135	0.234218	0.0348116	MG	1.96727	0.00225878	0.0791898	MG
chr1:51904143-51904643	nfixa	0.433887753694803	nfixa::TSS	2.04756	0.125381	0.0551407	MG	1.81635	0.191378	0.0392328	MG
chr1:52011044-52011544	nfixa	0.478925069253978	nfixa::Body	2.11101	0.198245	0.0201178	MG	3.89601	0.000739468	0.107597	MG
chr1:52014404-52014904	nfixa	0.62201271815497	nfixa::Body	2.46991	1.43005e-05	0.186591	MG	2.0021	0.00212932	0.175762	MG
chr1:52048164-52048664	nfixa	0.376777988306591	nfixa::Body	1.15998	0.0400495	0.172221	MG	1.6359	0.000203038	0.199643	MG
chr1:52538750-52539250	abca1a	0.386825349437549	abca1a::Inter	1.12556	0.301352	0.0224728	MG	1.75052	0.0123363	0.0404368	MG
chr1:5257343-5257843	spry2	0.493191148632689	spry2::Inter	3.94419	0.0276428	0.09232	MG	2.14236	0.12119	0.0391565	MG
chr1:52583010-52583510	abca1a	0.592966504069018	abca1a::Body	2.42294	0.0278323	0.0985422	MG	2.54852	0.00446569	0.110874	MG
chr1:5273195-5273695	spry2	0.76491379000913	spry2::TSS	0.794772	0.0177601	0.218851	MG	0.960111	0.00472166	0.341379	MG
chr1:5908134-5908634	pard3ba	0.403271068130867	pard3ba::Body	5.5915	0.00837584	0.0951974	MG	2.65961	0.016814	0.051605	MG
chr1:6084672-6085172	pard3ba	0.47866020912474	pard3ba::TSS	0.952896	0.112074	0.0776681	MG	1.00252	0.0100434	0.0898039	MG
chr1:8090540-8091040	si:dkeyp-9d4.3	0.656774364702497	si:dkeyp-9d4.3::Body	3.00095	1.42086e-08	0.378189	MG	3.20385	2.4205e-11	0.400845	MG
chr1:8100857-8101357	si:dkeyp-9d4.3	0.796127235093436	si:dkeyp-9d4.3::Body	1.77403	0.0145029	0.154327	MG	1.30711	0.00553122	0.0981258	MG
chr1:8117863-8118363	si:dkeyp-9d4.3	0.600027101250186	si:dkeyp-9d4.3::Inter	3.01003	0.00026051	0.133091	MG	3.24982	0.000237349	0.147044	MG
chr1:8204907-8205407	si:dkeyp-9d4.3	0.592727632198131	si:dkeyp-9d4.3::Inter	2.91957	0.0468414	0.0847165	MG	1.66103	0.0846271	0.0515388	MG
chr10:1133038-1133538	bmpr1bb	0.660040292369974	bmpr1bb::TSS	2.84745	0.00120236	0.163034	MG	0.997153	0.274224	0.0933371	MG
chr10:1144148-1144648	bmpr1bb	0.685868896249155	bmpr1bb::Body	1.6166	0.204833	0.0498117	MG	4.05464	0.0521317	0.0593171	MG
chr10:1146932-1147432	bmpr1bb	0.813502404202938	bmpr1bb::Body	2.75574	0.0129948	0.159324	MG	2.87466	0.00438202	0.179732	MG
chr10:1148227-1148727	bmpr1bb	0.874003534452843	bmpr1bb::Body	3.83952	3.22407e-11	0.425456	MG	2.26663	1.23061e-07	0.360863	MG
chr10:11763811-11764311	adamts6	0.729189786394705	adamts6::TSS	1.71347	0.29027	0.0502517	MG	0.945572	0.159454	0.0341115	MG
chr10:11764463-11764963	adamts6	0.476272568154832	adamts6::Inter	2.20741	0.0703188	0.0336686	MG	1.67002	0.0587516	0.0348665	MG
chr10:1275566-1276066	pdlim5b	0.662393386233643	pdlim5b::TSS	1.416	0.0499762	0.125609	MG	1.10309	0.135707	0.0759746	MG
chr10:1277598-1278098	pdlim5b	0.38492830947803	pdlim5b::TSS	2.48745	0.0704445	0.0749692	MG	0.573185	0.114032	0.026574	MG
chr10:13372523-13373023	il11ra	0.622235420216732	il11ra::Body	1.91665	0.0308367	0.0616793	MG	2.6744	0.0115913	0.0612989	MG
chr10:13385685-13386185	il11ra	0.736286987386283	il11ra::Body	3.1067	5.66162e-06	0.222023	MG	4.10245	1.88291e-08	0.319897	MG
chr10:16273591-16274091	CT027815.1	0.795611120071921	CT027815.1::Inter;slc27a6::Inter	2.12628	0.0279463	0.0470101	MG	2.59755	0.0382256	0.0787679	MG
chr10:16273591-16274091	slc27a6	0.795611120071921	CT027815.1::Inter;slc27a6::Inter	2.12628	0.0279463	0.0470101	MG	2.59755	0.0382256	0.0787679	MG
chr10:16276439-16276939	CT027815.1	0.877798730483946	CT027815.1::Inter;slc27a6::Inter	2.44589	0.0317158	0.0899908	MG	3.34376	0.000216213	0.112801	MG
chr10:16276439-16276939	slc27a6	0.877798730483946	CT027815.1::Inter;slc27a6::Inter	2.44589	0.0317158	0.0899908	MG	3.34376	0.000216213	0.112801	MG
chr10:16494612-16495112	CT027815.1	0.759697049918635	CT027815.1::TSS	1.96139	0.270741	0.0209883	MG	2.40978	0.0176586	0.0396719	MG
chr10:16495339-16495839	CT027815.1	0.807076722097207	CT027815.1::TSS	2.82429	5.20599e-05	0.20086	MG	1.27614	0.000878291	0.121613	MG
chr10:16497654-16498154	CT027815.1	0.647839494501839	CT027815.1::Inter	3.33675	0.222056	0.0183534	MG	2.90303	0.0574556	0.056087	MG
chr10:16501399-16501899	slc27a6	0.743860221602488	slc27a6::TSS	0.826212	0.00837584	0.229394	MG	1.27538	0.000118458	0.268787	MG
chr10:16517007-16517507	slc27a6	0.906024759020585	slc27a6::Body	4.39345	4.99708e-09	0.274692	MG	4.63892	4.09785e-18	0.486843	MG
chr10:16517528-16518028	slc27a6	0.828027165364404	slc27a6::Body	5.34907	3.26415e-05	0.0801608	MG	5.30817	2.91497e-10	0.193511	MG
chr10:17283715-17284215	GNAZ	0.679962183999955	GNAZ::TSS	2.66422	0.00333244	0.125902	MG	2.89177	1.70608e-06	0.182865	MG
chr10:17284666-17285166	GNAZ	ND	GNAZ::TSS	1.65765	0.270299	0.025601	MG	3.48974	0.0522854	0.0407985	MG
chr10:17719393-17719893	phf24	0.726543917730025	phf24::Inter	2.62491	2.00061e-06	0.273633	MG	2.25028	1.48304e-07	0.208306	MG
chr10:1777609-1778109	epb41l4a	0.425333908650272	epb41l4a::Body	2.02515	0.146833	0.034406	MG	1.75578	0.208789	0.030903	MG
chr10:17839511-17840011	phf24	0.737050941607993	phf24::Inter	5.30847	0.0202367	0.0778801	MG	4.63635	0.000599503	0.118798	MG
chr10:17850719-17851219	phf24	0.695902210895134	phf24::TSS	1.60193	0.0212968	0.153657	MG	1.78196	0.000132507	0.169901	MG
chr10:17851553-17852053	phf24	0.695051676149067	phf24::TSS	1.57648	0.0171052	0.166605	MG	1.34595	0.0390618	0.124304	MG
chr10:17874065-17874565	phf24	0.834721186092373	phf24::Body	3.10458	4.92426e-10	0.383214	MG	3.16407	2.25322e-12	0.442559	MG
chr10:1790541-1791041	epb41l4a	0.743611368000212	epb41l4a::Body	2.66211	0.000400917	0.13525	MG	2.00717	0.00517997	0.0877661	MG
chr10:18092184-18092684	phf24	0.709492337960675	phf24::Inter	3.50693	0.00015128	0.127323	MG	3.19268	0.00453002	0.0683342	MG
chr10:19784664-19785164	gfra2b	0.74400663438344	gfra2b::Body	2.37002	0.00990867	0.11193	MG	1.85315	0.00343593	0.0755449	MG
chr10:19801164-19801664	gfra2b	ND	gfra2b::TSS	4.12553	0.222056	0.0331744	MG	2.59804	0.117002	0.0316635	MG
chr10:19903666-19904166	gfra2b	0.750262465452349	gfra2b::Inter	4.67106	0.00344655	0.110577	MG	2.37664	0.0147124	0.0490592	MG
chr10:19931173-19931673	gfra2b	0.55542209343362	gfra2b::Inter	3.2979	0.198245	0.0514809	MG	1.80121	0.086738	0.0491958	MG
chr10:19942365-19942865	gfra2b	0.795487404900488	gfra2b::Inter	3.89426	0.000392333	0.169135	MG	4.64308	0.000148145	0.0956279	MG
chr10:19981418-19981918	gfra2b	0.829170535167326	gfra2b::Inter	3.95968	2.93277e-15	0.611272	MG	4.11528	4.87215e-22	0.644416	MG
chr10:20468495-20468995	tacc1	0.929067417612677	tacc1::Body	3.24392	6.52043e-09	0.350249	MG	3.43428	3.36919e-13	0.458928	MG
chr10:20469062-20469562	tacc1	0.808056969199185	tacc1::Body	3.79901	1.84222e-07	0.210428	MG	2.60269	0.000498817	0.123032	MG
chr10:20479789-20480289	tacc1	0.816644234239025	tacc1::Body	2.22661	0.0179046	0.105646	MG	0.571555	0.0064241	0.0544274	MG
chr10:20481039-20481539	tacc1	0.694057200182094	tacc1::Body	1.39595	0.198245	0.0288782	MG	1.50354	0.132369	0.0741061	MG
chr10:20481874-20482374	tacc1	0.785289614907084	tacc1::TSS	1.41778	7.31364e-06	0.415987	MG	1.36623	1.40772e-07	0.475826	MG
chr10:20503084-20503584	tacc1	0.774652455030347	tacc1::Inter	2.00778	0.0085088	0.199385	MG	1.1487	0.0386526	0.0737542	MG
chr10:23144211-23144711	cadm2a	0.337845653872999	cadm2a::Inter	2.03044	2.26229e-05	0.245268	MG	2.41472	1.57097e-10	0.341742	MG
chr10:23145257-23145757	cadm2a	0.510387758600181	cadm2a::Inter	2.94352	1.69308e-07	0.379135	MG	2.51687	3.32683e-07	0.262322	MG
chr10:23572566-23573066	cadm2a	0.457751094075133	cadm2a::Inter	1.90041	0.0468414	0.0919713	MG	3.35085	0.000317112	0.0840181	MG
chr10:23574843-23575343	cadm2a	0.510409395645578	cadm2a::Inter	2.78041	0.0468414	0.0778205	MG	3.21991	0.000349881	0.104326	MG
chr10:23587814-23588314	cadm2a	0.30188881334457	cadm2a::Inter	3.35235	0.222056	0.0185749	MG	1.93241	0.0396193	0.03899	MG
chr10:24314523-24315023	inpp5kb	0.678823513949108	inpp5kb::Body	1.96653	3.71936e-06	0.329804	MG	0.849552	0.0137117	0.143253	MG
chr10:24316559-24317059	inpp5kb	0.698497102171696	inpp5kb::Body	1.14159	0.155921	0.137788	MG	1.85282	0.000112978	0.172978	MG
chr10:24381668-24382168	slc43a2b	0.819959771755395	slc43a2b::Body	2.48256	2.26129e-11	0.366794	MG	2.43589	8.50732e-09	0.35961	MG
chr10:24389382-24389882	slc43a2b	ND	slc43a2b::TSS	2.43518	0.13966	0.0252799	MG	4.20253	0.0386526	0.0351036	MG
chr10:24390650-24391150	slc43a2b	0.556847096565112	slc43a2b::TSS	3.13329	0.0636422	0.0494789	MG	2.57073	0.057761	0.0437403	MG
chr10:24391550-24392050	slc43a2b	0.929662165146334	slc43a2b::TSS	2.936	6.6702e-09	0.338525	MG	3.78008	2.49905e-17	0.493255	MG
chr10:24392379-24392879	slc43a2b	0.783277142919513	slc43a2b::TSS	1.51273	0.0219862	0.0645216	MG	0.924375	0.049445	0.0451523	MG
chr10:24393187-24393687	slc43a2b	ND	slc43a2b::TSS	4.21954	0.155921	0.0355439	MG	3.31916	0.0788979	0.0439596	MG
chr10:24495424-24495924	slc43a2b	0.422632833220781	slc43a2b::Inter	0.440603	0.208188	0.0208136	MG	1.41298	0.0970365	0.0475645	MG
chr10:28835555-28836055	alcama	0.661818362099747	alcama::TSS	3.47708	0.000488122	0.246204	MG	0.931358	0.0579337	0.0997937	MG
chr10:28847277-28847777	alcama	0.582499214789486	alcama::Inter	4.6004	0.0707912	0.0468916	MG	4.97398	0.0105713	0.0613468	MG
chr10:29008400-29008900	alcama	0.654925392936704	alcama::Inter	3.02442	0.00272508	0.11784	MG	1.17003	0.00814853	0.0575122	MG
chr10:37754720-37755220	wscd1b	0.618565520400618	wscd1b::Inter	1.14967	0.00213451	0.209173	MG	1.21426	2.36845e-06	0.271296	MG
chr10:37970121-37970621	wscd1b	0.850336520415198	wscd1b::Inter	4.95476	7.44545e-05	0.174882	MG	3.37771	4.50092e-06	0.148849	MG
chr10:37981582-37982082	wscd1b	0.671387031765099	wscd1b::Body	1.67709	0.222056	0.0904632	MG	1.53709	0.0314742	0.0470498	MG
chr10:38146574-38147074	wscd1b	0.506343201844661	wscd1b::Inter	2.29233	0.0507494	0.127459	MG	1.79108	0.233167	0.0419142	MG
chr10:38159343-38159843	wscd1b	0.387105107735856	wscd1b::Inter	2.28066	0.020733	0.0527689	MG	2.58191	0.000254243	0.162352	MG
chr10:40836157-40836657	trim69	0.73981793557353	trim69::TSS	1.61141	0.000283704	0.165991	MG	1.20351	0.000803763	0.141701	MG
chr10:40836694-40837194	trim69	0.673190501588264	trim69::TSS	1.4009	0.00289087	0.0823053	MG	2.25009	6.91647e-05	0.125054	MG
chr10:40847773-40848273	trim69	0.563041562246353	trim69::Body	0.565891	0.321212	0.0598454	MG	1.86886	0.000343425	0.14106	MG
chr10:40939029-40939529	bmp1b	0.805039137317938	bmp1b::TSS	1.83303	0.0681706	0.110081	MG	1.53318	2.54023e-05	0.154925	MG
chr10:41560314-41560814	CABZ01049847.1	0.694526679595727	CABZ01049847.1::Body	5.98754	4.79438e-09	0.352014	MG	4.90161	7.75704e-07	0.162696	MG
chr10:41567492-41567992	CABZ01049847.1	0.525129733574016	CABZ01049847.1::Body	3.81821	0.0055539	0.103264	MG	3.25411	0.000487417	0.0668417	MG
chr10:41568036-41568536	CABZ01049847.1	0.664228914004959	CABZ01049847.1::Body	3.18444	2.22812e-06	0.209298	MG	3.24644	2.57018e-08	0.243302	MG
chr10:41783357-41783857	CABZ01049847.1	0.597800658198013	CABZ01049847.1::Inter	1.36335	0.042135	0.0684955	MG	3.22978	5.87703e-07	0.213241	MG
chr10:42589197-42589697	fgfr1b	0.864332651332421	fgfr1b::TSS	1.11	0.0700937	0.0747299	MG	1.25143	0.0153068	0.0833399	MG
chr10:42830899-42831399	fgfr1b	0.459870704104151	fgfr1b::Inter	5.25798	0.0707912	0.0751323	MG	2.54622	0.0253313	0.0574285	MG
chr10:43510622-43511122	si:ch73-215f7.1	0.869608869836084	si:ch73-215f7.1::Body	1.61807	3.96916e-07	0.408402	MG	1.42253	1.66679e-07	0.403941	MG
chr10:43519886-43520386	si:ch73-215f7.1	0.418413861665916	si:ch73-215f7.1::Body	1.64078	0.209209	0.0778013	MG	0.913699	0.240269	0.059851	MG
chr10:5904083-5904583	tln1	0.699526383962976	tln1::Inter	0.889556	0.00445278	0.153289	MG	1.06092	0.00204496	0.186692	MG
chr10:5925485-5925985	tln1	0.677932713040957	tln1::Inter	1.34337	0.00612076	0.176458	MG	1.55846	0.00200269	0.191797	MG
chr10:5931929-5932429	tln1	0.57902398046901	tln1::Inter	3.55163	0.0318306	0.144332	MG	1.78573	0.171045	0.0916283	MG
chr10:5934462-5934962	tln1	0.590744677321868	tln1::Inter	3.20975	3.18319e-06	0.20906	MG	2.00482	0.00136827	0.115897	MG
chr10:7936056-7936556	osbp2	0.712943349924358	osbp2::Body	4.73269	0.0202367	0.0515884	MG	1.36592	0.136745	0.0659589	MG
chr10:7942522-7943022	osbp2	0.778885214265581	osbp2::Body	2.4321	8.87844e-06	0.225595	MG	2.94735	1.59509e-08	0.349291	MG
chr10:7946184-7946684	osbp2	0.736142725472918	osbp2::Body	1.62319	0.145607	0.0425412	MG	1.57243	0.00540857	0.0690402	MG
chr10:7959585-7960085	osbp2	0.707039924290131	osbp2::TSS	2.33096	0.162108	0.0822333	MG	1.52433	0.00403804	0.103984	MG
chr10:883163-883663	bmpr1bb	0.579412202364009	bmpr1bb::Inter	1.33751	0.00654019	0.159827	MG	2.14193	5.09546e-06	0.311736	MG
chr10:8967960-8968460	fstb	0.871099526852596	fstb::TSS	1.9526	9.32014e-05	0.156712	MG	1.50488	0.17314	0.0731668	MG
chr10:8968888-8969388	fstb	0.826133427026535	fstb::TSS	5.301	0.00338844	0.0774677	MG	2.38956	0.152764	0.0378115	MG
chr10:8983531-8984031	fstb	0.806540185652456	fstb::Inter	3.59093	0.000298673	0.203944	MG	2.66928	0.000106992	0.192624	MG
chr10:8988553-8989053	fstb	0.746446056764915	fstb::Inter	3.3383	0.198245	0.0349754	MG	1.38551	0.0592795	0.0325575	MG
chr10:9136820-9137320	fstb	0.538343907050936	fstb::Inter	2.52939	0.134819	0.0531787	MG	2.50907	0.135418	0.0643045	MG
chr10:9145137-9145637	fstb	0.439721145308153	fstb::Inter	2.64066	0.000284219	0.237349	MG	0.427837	0.199313	0.0499695	MG
chr10:962759-963259	bmpr1bb	0.442165137266344	bmpr1bb::Inter	1.19559	0.198245	0.0862239	MG	1.05774	0.0266447	0.109024	MG
chr11:14527671-14528171	si:ch73-60h1.1	0.460103676152163	si:ch73-60h1.1::Inter	1.27452	0.142913	0.0884023	MG	2.25594	0.00018261	0.179353	MG
chr11:1628294-1628794	lrp1aa	0.725653145108609	lrp1aa::TSS	1.43508	0.0477385	0.192743	MG	1.32764	0.00090083	0.167615	MG
chr11:1628922-1629422	lrp1aa	0.785403460350258	lrp1aa::TSS	1.73319	0.0117583	0.0954146	MG	2.16408	0.00297052	0.0948461	MG
chr11:1629832-1630332	lrp1aa	ND	lrp1aa::TSS	2.29522	0.270299	0.0373127	MG	2.93209	0.168509	0.0302031	MG
chr11:18702762-18703262	id1	0.858391200715517	id1::Inter	2.06532	1.21499e-09	0.426615	MG	1.88759	6.25144e-07	0.277635	MG
chr11:18703459-18703959	id1	0.893152471010028	id1::TSS	1.2598	0.00648551	0.0829434	MG	2.59497	0.00666315	0.134081	MG
chr11:18704398-18704898	id1	0.787301467079263	id1::TSS	1.35176	0.0424318	0.162895	MG	0.782274	0.0604111	0.0733607	MG
chr11:18705095-18705595	id1	0.883721986573525	id1::TSS	1.72098	1.26501e-09	0.656204	MG	1.42759	8.67272e-10	0.504436	MG
chr11:18706654-18707154	id1	0.890725427231877	id1::TSS	1.63832	1.30467e-09	0.56227	MG	1.53145	1.3244e-07	0.477998	MG
chr11:18707383-18707883	id1	0.887352720931143	id1::Inter	1.35258	2.73067e-06	0.410695	MG	1.67633	1.45215e-07	0.406209	MG
chr11:18869492-18869992	id1	0.499735577159577	id1::Inter	5.65084	0.000859735	0.0992793	MG	2.91693	0.0256342	0.0694265	MG
chr11:194557-195057	col2a1b	0.511156446612077	col2a1b::Inter	0.7737	0.0976547	0.199536	MG	0.823328	0.191378	0.207291	MG
chr11:198492-198992	col2a1b	0.649687188573034	col2a1b::Inter	3.35931	1.93584e-07	0.279227	MG	3.13286	4.0935e-06	0.309843	MG
chr11:20502628-20503128	cdh4	0.744665966167437	cdh4::Body	3.1917	0.0329852	0.11882	MG	2.2479	0.00493849	0.0876847	MG
chr11:20503163-20503663	cdh4	0.800986837703924	cdh4::Body	1.91594	0.00936982	0.155624	MG	2.24436	5.28233e-07	0.242108	MG
chr11:208139-208639	col2a1b	0.513326970086669	col2a1b::Inter	1.70711	0.301352	0.0609973	MG	1.68176	0.103119	0.0754805	MG
chr11:23467833-23468333	nfasca	0.708383859882881	nfasca::Inter	2.61613	0.000534812	0.151737	MG	2.46657	0.000146586	0.148383	MG
chr11:23468335-23468835	nfasca	0.779039610086543	nfasca::Inter	2.8749	9.12845e-07	0.335244	MG	2.70536	1.44831e-06	0.225777	MG
chr11:23760331-23760831	nfasca	0.800870171995519	nfasca::TSS	1.75313	4.56135e-06	0.350734	MG	0.701301	0.0175126	0.18902	MG
chr11:23762145-23762645	nfasca	ND	nfasca::TSS	2.23023	0.270299	0.022452	MG	1.94504	0.120867	0.0353662	MG
chr11:23821062-23821562	nfasca	0.730029449278648	nfasca::Body	1.35052	0.224694	0.0434589	MG	1.51609	0.00174023	0.0802939	MG
chr11:23821647-23822147	nfasca	0.87727598101003	nfasca::Body	4.2732	4.12077e-15	0.542773	MG	3.41103	4.28913e-20	0.622952	MG
chr11:23829783-23830283	nfasca	0.856325065202256	nfasca::Body	2.33291	0.000344902	0.210502	MG	2.54618	0.000680524	0.183715	MG
chr11:23830399-23830899	nfasca	0.659816270684826	nfasca::Body	3.92521	0.00147655	0.124167	MG	3.72452	0.00474312	0.077627	MG
chr11:25397767-25398267	comtb	0.624785059724705	comtb::Inter	2.29082	0.0699132	0.0480582	MG	2.47123	0.057926	0.0707025	MG
chr11:25618482-25618982	comtb	0.790254632040335	comtb::TSS	4.39008	1.34483e-08	0.277254	MG	2.44552	0.00042742	0.090141	MG
chr11:25619743-25620243	comtb	0.798232686888685	comtb::TSS	1.51056	0.001646	0.174169	MG	2.31893	4.8206e-05	0.225644	MG
chr11:25751859-25752359	comtb	0.731662087187021	comtb::Inter	1.9489	0.0148627	0.058848	MG	3.26751	0.000352018	0.0927161	MG
chr11:257836-258336	col2a1b	0.609362774923735	col2a1b::Inter	1.30541	0.270299	0.054873	MG	2.11015	0.0572703	0.0576225	MG
chr11:30160739-30161239	cdkl5	0.720537692775921	cdkl5::TSS	1.01801	0.00223772	0.343733	MG	0.749361	0.000453073	0.33272	MG
chr11:30174270-30174770	cdkl5	0.588916720918037	cdkl5::Body	4.15886	8.82493e-07	0.201948	MG	4.1218	3.62291e-05	0.208775	MG
chr11:34385829-34386329	mapkapk3	0.601683025370853	mapkapk3::Inter	1.7135	0.168622	0.0623931	MG	2.69085	0.0111201	0.0902944	MG
chr11:34456304-34456804	mapkapk3	0.465405125025904	mapkapk3::Inter	2.41517	0.264705	0.0511796	MG	1.86594	0.0395191	0.0311143	MG
chr11:34491742-34492242	mapkapk3	0.63443947595789	mapkapk3::Inter	3.2323	0.0422095	0.0638195	MG	4.59756	0.0253313	0.0467955	MG
chr11:34598895-34599395	mapkapk3	0.771375948387484	mapkapk3::Body	2.33396	0.00665663	0.0964992	MG	3.16406	3.0145e-05	0.112866	MG
chr11:34613979-34614479	mapkapk3	0.816157137367746	mapkapk3::Body	3.36125	8.95872e-07	0.273709	MG	2.62609	2.89501e-07	0.247644	MG
chr11:34628439-34628939	mapkapk3	0.5558152162516	mapkapk3::TSS	1.02491	0.0145959	0.110824	MG	0.896949	0.263911	0.108456	MG
chr11:34628998-34629498	mapkapk3	0.522062529926795	mapkapk3::TSS	1.93435	6.53258e-05	0.217392	MG	1.03345	0.105219	0.110264	MG
chr11:34745061-34745561	gnai2a	0.752562134960576	gnai2a::Inter;mapkapk3::Inter	5.55805	2.60466e-06	0.17187	MG	5.14244	5.72763e-05	0.115749	MG
chr11:34745061-34745561	mapkapk3	0.752562134960576	gnai2a::Inter;mapkapk3::Inter	5.55805	2.60466e-06	0.17187	MG	5.14244	5.72763e-05	0.115749	MG
chr11:34807923-34808423	gnai2a	0.643414041511727	gnai2a::Inter;mapkapk3::Inter	0.861142	0.248533	0.0304641	MG	2.22103	0.00484876	0.101377	MG
chr11:34807923-34808423	mapkapk3	0.643414041511727	gnai2a::Inter;mapkapk3::Inter	0.861142	0.248533	0.0304641	MG	2.22103	0.00484876	0.101377	MG
chr11:34817631-34818131	gnai2a	0.835557838584134	gnai2a::Inter;mapkapk3::Inter	1.74875	1.0332e-09	0.542615	MG	1.94028	3.78142e-11	0.52705	MG
chr11:34817631-34818131	mapkapk3	0.835557838584134	gnai2a::Inter;mapkapk3::Inter	1.74875	1.0332e-09	0.542615	MG	1.94028	3.78142e-11	0.52705	MG
chr11:34921056-34921556	gnai2a	0.749145944915575	gnai2a::TSS	2.29577	8.97596e-05	0.210184	MG	0.542317	0.273665	0.071296	MG
chr11:34933934-34934434	gnai2a	0.836843693222966	gnai2a::Body	1.38585	0.222872	0.0815689	MG	0.629996	0.109786	0.0494485	MG
chr11:34937637-34938137	gnai2a	0.630745048846374	gnai2a::Body	2.06212	0.00277607	0.0713618	MG	3.15024	0.224882	0.0495494	MG
chr11:34946761-34947261	gnai2a	0.705339878095578	gnai2a::Body	3.32969	0.000796986	0.098158	MG	2.9632	0.00166732	0.143641	MG
chr11:35758994-35759494	sema3fb	0.646112817620776	sema3fb::Inter	3.52574	2.18283e-06	0.272983	MG	2.04204	4.46442e-05	0.164582	MG
chr11:35759840-35760340	sema3fb	0.374529385882828	sema3fb::Inter	1.95485	0.198245	0.045396	MG	2.17643	0.0581341	0.0388008	MG
chr11:35760466-35760966	bhlhe40	0.360405224359841	bhlhe40::Body	2.92661	0.00952636	0.121566	MG	0.895356	0.0215267	0.0429514	MG
chr11:35761216-35761716	bhlhe40	0.441117789393734	bhlhe40::Body	2.06033	0.0811703	0.0849612	MG	1.83968	0.0314023	0.0761844	MG
chr11:35761949-35762449	bhlhe40	0.413833842994365	bhlhe40::TSS	1.78088	0.000137904	0.155439	MG	1.64336	0.026578	0.119105	MG
chr11:35762557-35763057	bhlhe40	0.343312303325438	bhlhe40::Body	2.53728	0.00271254	0.105938	MG	1.16027	0.132385	0.0562166	MG
chr11:35763128-35763628	bhlhe40	0.466400356010857	bhlhe40::TSS	1.726	6.02334e-10	0.5999	MG	1.46148	3.99096e-13	0.543898	MG
chr11:35778039-35778539	sema3fb	0.662009016268674	sema3fb::Inter	4.41356	0.0707912	0.0409505	MG	2.05969	0.0765134	0.0578407	MG
chr11:35821271-35821771	sema3fb	0.698682179046095	sema3fb::Inter	3.37644	6.8954e-08	0.404847	MG	3.72461	3.61069e-15	0.440819	MG
chr11:35825300-35825800	sema3fb	0.663512604430168	sema3fb::Inter	4.42669	0.000765887	0.13563	MG	3.38813	0.016572	0.0944637	MG
chr11:35863408-35863908	bhlhe40	0.390036268592915	bhlhe40::Inter	2.70802	6.80654e-07	0.297899	MG	2.82505	1.02225e-07	0.276333	MG
chr11:35868188-35868688	bhlhe40	0.522796170170798	bhlhe40::Inter	6.10582	2.11941e-13	0.507127	MG	4.44407	7.36526e-16	0.435952	MG
chr11:35874975-35875475	bhlhe40	0.462691023922224	bhlhe40::Inter	2.61987	9.44242e-08	0.260413	MG	4.43388	5.59488e-14	0.364312	MG
chr11:35885188-35885688	bhlhe40	0.496621250545538	bhlhe40::Inter	3.54583	4.40724e-07	0.220216	MG	2.89828	4.95067e-10	0.289708	MG
chr11:35891462-35891962	bhlhe40	0.421341055512465	bhlhe40::Inter	2.07344	4.01329e-12	0.592855	MG	2.05058	5.3271e-15	0.617045	MG
chr11:35945031-35945531	bhlhe40	0.734112045819465	bhlhe40::Inter;grm2b::Inter	4.34067	7.26227e-06	0.183383	MG	3.0976	9.87206e-05	0.088319	MG
chr11:35945031-35945531	grm2b	0.734112045819465	bhlhe40::Inter;grm2b::Inter	4.34067	7.26227e-06	0.183383	MG	3.0976	9.87206e-05	0.088319	MG
chr11:36060146-36060646	sort1a	0.619031871416278	sort1a::Inter	3.256	0.000741807	0.142217	MG	4.00222	5.68153e-06	0.188173	MG
chr11:36070763-36071263	sort1a	0.630402400765755	sort1a::Inter	3.86631	0.000943492	0.138694	MG	1.83055	0.0619331	0.0770055	MG
chr11:36158033-36158533	grm2b	0.880663754549306	grm2b::TSS	4.2017	5.75935e-05	0.13751	MG	5.63029	2.81482e-07	0.164865	MG
chr11:36158546-36159046	grm2b	0.818604538546612	grm2b::Body	4.01398	0.00729642	0.0581604	MG	4.20277	0.000730167	0.0923354	MG
chr11:36201097-36201597	grm2b	0.697613867447282	grm2b::Body	2.81344	0.270299	0.0345773	MG	2.95066	0.170206	0.0379013	MG
chr11:36319543-36320043	sort1a	0.710279464726973	sort1a::Body	1.17735	0.000386247	0.230719	MG	0.761431	0.0281712	0.150961	MG
chr11:36825396-36825896	tkta	0.47212986359249	tkta::Inter	2.57362	0.00116709	0.115963	MG	3.46701	9.62374e-06	0.214118	MG
chr11:36989545-36990045	tkta	0.563064901861856	tkta::TSS	1.59179	0.00281475	0.30704	MG	0.61228	0.03238	0.108655	MG
chr11:37521263-37521763	sox13	0.717852800759307	sox13::Inter	1.57708	0.122168	0.117536	MG	2.15362	0.00143916	0.125075	MG
chr11:37526529-37527029	sox13	0.827272218625767	sox13::Inter	1.4508	1.77296e-05	0.200905	MG	2.29031	1.84708e-10	0.287504	MG
chr11:37527093-37527593	sox13	0.746615960122791	sox13::Inter	1.83161	0.00417327	0.0913461	MG	1.02879	0.00074205	0.0515777	MG
chr11:37545258-37545758	sox13	0.522424135748687	sox13::Inter	3.53064	0.0202367	0.0614673	MG	1.8214	0.0433464	0.0619288	MG
chr11:37559068-37559568	sox13	0.677970138485235	sox13::Inter	2.02423	0.164578	0.0642902	MG	1.94319	0.00740719	0.0903778	MG
chr11:37600011-37600511	sox13	0.588180187193814	sox13::Inter	2.4245	0.0130403	0.108922	MG	1.74063	0.0995129	0.0959482	MG
chr11:37744677-37745177	sox13	0.725633154091047	sox13::Inter	2.17751	0.145712	0.0383743	MG	1.55999	0.248732	0.0726638	MG
chr11:37747363-37747863	sox13	0.866093919554694	sox13::Inter	1.98099	0.0142026	0.192163	MG	1.11498	0.00601572	0.136363	MG
chr11:37768149-37768649	sox13	0.818809045251212	sox13::TSS	1.43957	0.156397	0.0948415	MG	0.515523	0.243629	0.0449135	MG
chr11:37801194-37801694	sox13	0.699847653703298	sox13::Body	1.5566	0.270299	0.0620748	MG	1.56106	0.257016	0.0466605	MG
chr11:38154932-38155432	CDK18	0.591884163128548	CDK18::Inter	1.07437	0.0468414	0.103628	MG	1.3938	0.00216693	0.129418	MG
chr11:38162205-38162705	CDK18	0.377838313905137	CDK18::Inter	0.979242	0.0332353	0.0954404	MG	1.90293	0.011235	0.146779	MG
chr11:38312294-38312794	CDK18	0.716838921527531	CDK18::Body	2.42343	7.98814e-08	0.297079	MG	2.93064	3.44595e-09	0.367855	MG
chr11:38315985-38316485	CDK18	0.692041181462247	CDK18::Body	3.62016	1.89185e-06	0.213675	MG	2.84409	2.97232e-05	0.1777	MG
chr11:38329158-38329658	CDK18	0.673106964533085	CDK18::Body	1.95651	0.0171086	0.133259	MG	4.4215	0.000148606	0.0880878	MG
chr11:40786349-40786849	errfi1a	0.463393865487041	errfi1a::Inter	1.22582	0.0119359	0.184092	MG	0.826045	0.234589	0.141856	MG
chr11:40787045-40787545	errfi1a	0.675040846339361	errfi1a::Inter	2.78593	0.0280947	0.12323	MG	0.645371	0.221651	0.0576188	MG
chr11:40793572-40794072	errfi1a	0.862348311400094	errfi1a::Inter	3.13656	1.74606e-09	0.287079	MG	4.7455	1.31524e-11	0.326392	MG
chr11:40794858-40795358	errfi1a	0.598291354761041	errfi1a::Inter	0.967268	0.267509	0.0501371	MG	2.6526	6.4123e-05	0.151831	MG
chr11:40797252-40797752	errfi1a	0.729780584056694	errfi1a::Inter	2.42545	0.266148	0.0564283	MG	1.72967	0.171927	0.0521873	MG
chr11:40799917-40800417	errfi1a	0.799243168752481	errfi1a::Inter	4.18239	0.0177601	0.0989642	MG	2.80445	0.000628704	0.081357	MG
chr11:40831618-40832118	errfi1a	0.652847459053143	errfi1a::TSS	1.27958	0.00463776	0.241849	MG	1.64886	4.96374e-06	0.265993	MG
chr11:40851523-40852023	errfi1a	0.507500865458377	errfi1a::Inter	2.29565	0.236759	0.0506945	MG	2.1317	0.266429	0.0691383	MG
chr11:42177609-42178109	ENSDARG00000098374	0.513181125006085	ENSDARG00000098374::Inter	3.16212	0.00604777	0.0972345	MG	3.45894	0.00686602	0.0679141	MG
chr11:42197317-42197817	ENSDARG00000098374	0.554597515925881	ENSDARG00000098374::Inter	3.23952	0.00172943	0.149131	MG	1.16292	0.0808932	0.0501631	MG
chr11:42205872-42206372	ENSDARG00000098374	0.648399746606549	ENSDARG00000098374::Inter	2.25719	0.000121808	0.214986	MG	1.81058	0.000999954	0.175165	MG
chr11:42247699-42248199	ENSDARG00000098374	0.527192574187857	ENSDARG00000098374::Inter	1.85976	0.147436	0.0327674	MG	2.08579	0.191378	0.0598703	MG
chr11:42251492-42251992	ENSDARG00000098374	0.499540265929664	ENSDARG00000098374::Inter	2.54833	0.270299	0.0334576	MG	3.38664	0.00936625	0.0767204	MG
chr11:42279701-42280201	ENSDARG00000098374	0.563878268711133	ENSDARG00000098374::Inter	2.12103	0.044009	0.0817567	MG	3.17222	0.00135301	0.113982	MG
chr11:42292470-42292970	ENSDARG00000098374	0.744807296306896	ENSDARG00000098374::Inter	2.07852	0.000434831	0.225434	MG	1.11704	0.129364	0.117874	MG
chr11:42335710-42336210	ENSDARG00000098374	0.540441085058403	ENSDARG00000098374::Inter	2.15277	0.014661	0.054637	MG	1.29155	0.122586	0.065909	MG
chr11:42641281-42641781	il17rd	0.715814274755128	il17rd::TSS	2.65093	0.000705279	0.104644	MG	1.43184	0.0613875	0.0551099	MG
chr11:42867891-42868391	il17rd	0.598353828177736	il17rd::Inter	2.10627	0.102617	0.050948	MG	2.00356	0.00958788	0.12877	MG
chr11:44112956-44113456	FO704721.3	0.862956997497421	FO704721.3::Inter	2.758	1.70484e-06	0.224231	MG	3.46599	2.04078e-08	0.264905	MG
chr11:44116302-44116802	FO704721.3	0.831656693756112	FO704721.3::Inter	2.04442	1.58397e-05	0.179782	MG	1.73673	1.74159e-05	0.163753	MG
chr11:44118134-44118634	FO704721.3	0.742073210225302	FO704721.3::Inter	4.34277	0.0275834	0.11241	MG	5.46067	0.000680116	0.0867696	MG
chr11:44119765-44120265	FO704721.3	0.7953747839617	FO704721.3::Inter	3.68265	9.53054e-05	0.113735	MG	2.77965	0.0001029	0.13405	MG
chr11:44173167-44173667	FO704721.3	0.642325417420213	FO704721.3::Inter	1.1364	0.00848502	0.118073	MG	1.58324	0.00945769	0.199565	MG
chr11:44706505-44707005	pfklb	0.792929029345255	pfklb::Inter	2.69495	7.92597e-06	0.28116	MG	3.50981	5.67548e-08	0.237638	MG
chr11:44712126-44712626	pfklb	0.629231138194427	pfklb::Inter	0.684185	0.182174	0.106105	MG	0.993781	0.00228586	0.0920303	MG
chr11:44714678-44715178	pfklb	0.439712794273786	pfklb::Inter	1.00136	0.301352	0.120289	MG	1.03199	0.0443299	0.122016	MG
chr11:44740406-44740906	pfklb	0.836346229727315	pfklb::Inter	3.26984	5.35056e-08	0.276209	MG	1.74353	0.000149841	0.14005	MG
chr11:44774531-44775031	pfklb	0.742269814644375	pfklb::Inter	1.8147	0.0202325	0.141522	MG	2.57126	1.89539e-07	0.284625	MG
chr11:44778199-44778699	pfklb	0.81170147662141	pfklb::Inter	2.95554	5.51447e-06	0.245475	MG	2.74568	2.76437e-05	0.146169	MG
chr11:44781740-44782240	pfklb	0.847234855740105	pfklb::Inter	1.7549	2.65455e-07	0.374515	MG	2.10466	8.14242e-11	0.426784	MG
chr11:44783863-44784363	pfklb	0.781605843998144	pfklb::Inter	1.88543	0.000132985	0.162611	MG	2.20675	1.04872e-07	0.264894	MG
chr11:44931205-44931705	pfklb	0.769295679131592	pfklb::Body	2.50047	2.88731e-05	0.215324	MG	1.34966	0.0124023	0.127544	MG
chr11:45089816-45090316	pfklb	0.68247814990918	pfklb::Inter	1.85188	0.00424948	0.105914	MG	2.03188	0.0488853	0.12607	MG
chr11:45168640-45169140	syngr2b	0.757371070151437	syngr2b::Body	2.96104	0.00172943	0.130909	MG	0.820259	0.149527	0.0520844	MG
chr11:45170987-45171487	syngr2b	0.802900053666744	syngr2b::TSS	1.8272	3.33071e-05	0.414771	MG	1.09514	0.00273431	0.208508	MG
chr11:45174491-45174991	pfklb	0.731942982074005	pfklb::Inter	2.50662	1.26398e-10	0.47785	MG	2.97555	4.67969e-15	0.461917	MG
chr11:4747211-4747711	ptprga	0.320671554255904	ptprga::Inter	3.51303	0.00106094	0.133936	MG	2.91541	1.18996e-05	0.209052	MG
chr11:4953254-4953754	ptprga	0.540387765981506	ptprga::TSS	1.17956	0.152717	0.139258	MG	1.24651	0.0341845	0.0975536	MG
chr11:4982374-4982874	ptprga	0.333154992335625	ptprga::Body	3.23431	0.139701	0.0545198	MG	3.74401	9.75065e-05	0.0834354	MG
chr11:5064846-5065346	ptprga	0.374182023458622	ptprga::Body	1.75696	0.0605312	0.0802443	MG	1.49405	0.0124312	0.100441	MG
chr11:5171974-5172474	ptprga	0.378778805814508	ptprga::Body	1.86605	0.198245	0.0629156	MG	4.19713	3.76345e-05	0.156381	MG
chr11:57962-58462	col2a1b	0.852605219773537	col2a1b::Inter	2.18235	0.000545878	0.156672	MG	2.35908	0.000119892	0.200208	MG
chr11:5991050-5991550	ano8b	0.676417683614393	ano8b::Body	4.43645	0.0468414	0.0416377	MG	2.62655	0.118779	0.0479295	MG
chr11:5998670-5999170	ano8b	0.748519832305675	ano8b::Body	4.07998	0.00358886	0.121287	MG	3.44588	0.00439926	0.047872	MG
chr12:10746952-10747452	raraa	0.537680076496869	raraa::Inter	2.20896	0.0707673	0.0762361	MG	1.47183	0.107198	0.0402864	MG
chr12:10832775-10833275	raraa	0.657008925802562	raraa::Inter	6.73396	8.33424e-05	0.21259	MG	2.29683	0.0170562	0.0717799	MG
chr12:10843366-10843866	raraa	0.552364983404036	raraa::Inter	1.57107	0.0127903	0.0939978	MG	2.19484	0.000109914	0.115529	MG
chr12:10845932-10846432	raraa	0.682444495321009	raraa::Inter	3.85909	0.0309017	0.0951657	MG	4.07988	0.000295299	0.110521	MG
chr12:1085018-1085518	sox8a	0.867144168424617	sox8a::TSS	2.45358	1.95921e-11	0.51962	MG	2.40741	2.29254e-07	0.364125	MG
chr12:1086197-1086697	sox8a	ND	sox8a::TSS	4.56326	0.0949772	0.0894443	MG	3.63967	0.191378	0.0231125	MG
chr12:1099546-1100046	sox8a	0.594988842390243	sox8a::Inter	3.21653	0.270299	0.0374085	MG	2.23899	0.0227496	0.04046	MG
chr12:1103973-1104473	sox8a	0.659334488277115	sox8a::Inter	1.60506	0.190147	0.0464422	MG	3.40182	0.0253313	0.0646319	MG
chr12:11079042-11079542	raraa	0.737797501703209	raraa::Body	4.86093	5.70769e-05	0.198378	MG	2.09044	0.000105233	0.101596	MG
chr12:1112694-1113194	sox8a	0.633818870706297	sox8a::Inter	4.04222	0.0272644	0.0772289	MG	1.94868	0.0240558	0.0802544	MG
chr12:1114604-1115104	sox8a	0.733923096835493	sox8a::Inter	1.10756	0.29872	0.0524453	MG	2.074	0.0628795	0.102012	MG
chr12:1302405-1302905	sox8a	0.60458965143199	sox8a::Inter	2.53791	0.141533	0.0523782	MG	3.46963	0.0114917	0.121123	MG
chr12:16280220-16280720	ppp1r3cb	0.504568388389446	ppp1r3cb::TSS	3.19576	0.13956	0.0355914	MG	1.2801	0.256146	0.0321334	MG
chr12:16283739-16284239	ppp1r3cb	0.652942149879132	ppp1r3cb::TSS	1.28049	7.4301e-07	0.613477	MG	0.97102	7.70039e-07	0.416687	MG
chr12:16285639-16286139	ppp1r3cb	0.837598464226211	ppp1r3cb::Body	5.58849	9.20086e-14	0.447563	MG	4.21334	8.08023e-11	0.279263	MG
chr12:16290917-16291417	pcgf5b	0.591421374537154	pcgf5b::Inter	3.35021	0.0179967	0.0609447	MG	1.68761	0.172548	0.0247576	MG
chr12:16294343-16294843	pcgf5b	0.738026507159549	pcgf5b::Inter;ppp1r3cb::Inter	3.65236	0.00558473	0.0825624	MG	3.88388	0.00474312	0.107519	MG
chr12:16294343-16294843	ppp1r3cb	0.738026507159549	pcgf5b::Inter;ppp1r3cb::Inter	3.65236	0.00558473	0.0825624	MG	3.88388	0.00474312	0.107519	MG
chr12:16305504-16306004	pcgf5b	0.509728159089292	pcgf5b::Inter;ppp1r3cb::Inter	2.93754	0.145438	0.0684269	MG	2.85949	0.0528416	0.0515746	MG
chr12:16305504-16306004	ppp1r3cb	0.509728159089292	pcgf5b::Inter;ppp1r3cb::Inter	2.93754	0.145438	0.0684269	MG	2.85949	0.0528416	0.0515746	MG
chr12:16313397-16313897	pcgf5b	0.852537795255855	pcgf5b::Inter;ppp1r3cb::Inter	3.95714	5.39416e-10	0.322215	MG	2.50855	2.22885e-08	0.248528	MG
chr12:16313397-16313897	ppp1r3cb	0.852537795255855	pcgf5b::Inter;ppp1r3cb::Inter	3.95714	5.39416e-10	0.322215	MG	2.50855	2.22885e-08	0.248528	MG
chr12:16434684-16435184	pcgf5b	0.780997883434017	pcgf5b::TSS	1.36972	0.143492	0.0650058	MG	2.42037	0.000853437	0.109537	MG
chr12:18234402-18234902	fam20cb	0.664210258365412	fam20cb::TSS	1.36948	0.0204765	0.114309	MG	1.47293	0.020445	0.062455	MG
chr12:22291833-22292333	zbtb4	0.721061325497906	zbtb4::Inter	2.24362	0.00797062	0.130207	MG	0.693214	0.087104	0.0555508	MG
chr12:22292388-22292888	zbtb4	0.76125837759869	zbtb4::Inter	2.85154	4.35715e-09	0.449201	MG	2.69437	7.61447e-15	0.438172	MG
chr12:22316468-22316968	zbtb4	0.500853420777715	zbtb4::Inter	5.48415	2.61058e-06	0.192494	MG	6.30488	2.02776e-11	0.279497	MG
chr12:22538340-22538840	zbtb4	0.749699159510836	zbtb4::Body	1.23051	0.000978597	0.212323	MG	1.29172	2.37813e-05	0.220031	MG
chr12:22538874-22539374	zbtb4	0.808093533656466	zbtb4::Body	1.54244	0.00534072	0.215336	MG	1.09122	0.00129483	0.209669	MG
chr12:22539575-22540075	zbtb4	0.794236832518743	zbtb4::TSS	2.49525	0.000421445	0.250027	MG	1.0245	0.132369	0.12264	MG
chr12:22540795-22541295	zbtb4	0.829020204541955	zbtb4::TSS	1.33171	1.78669e-05	0.353543	MG	0.861988	0.000636757	0.319965	MG
chr12:22541352-22541852	zbtb4	0.764201042622612	zbtb4::TSS	1.4753	0.00849709	0.122949	MG	1.84943	5.24995e-06	0.166987	MG
chr12:22541888-22542388	zbtb4	0.723993889730223	zbtb4::TSS	1.74921	0.0226308	0.0563478	MG	1.52714	0.0386526	0.0674462	MG
chr12:22774021-22774521	zbtb4	0.629424431968429	zbtb4::Inter	2.45186	0.0309017	0.0910423	MG	2.39371	0.0143135	0.120803	MG
chr12:23175538-23176038	bambia	0.525648052798575	bambia::Inter	5.69572	0.00338844	0.102481	MG	1.96441	0.0174174	0.0448873	MG
chr12:23180197-23180697	bambia	0.618080545055196	bambia::Inter	4.40951	0.000763891	0.0824966	MG	2.68913	0.00334315	0.0958429	MG
chr12:23513570-23514070	jcada	0.709388956661744	jcada::Inter	1.78311	1.86991e-05	0.385433	MG	2.35862	1.30583e-11	0.429277	MG
chr12:23514221-23514721	jcada	0.635768584269016	jcada::Inter	2.09656	0.285236	0.0641257	MG	2.73176	0.0253313	0.0411429	MG
chr12:23566766-23567266	bambia	0.821351259345506	bambia::Inter;jcada::Inter	1.80774	2.43028e-08	0.313415	MG	1.56747	2.57466e-05	0.240128	MG
chr12:23566766-23567266	jcada	0.821351259345506	bambia::Inter;jcada::Inter	1.80774	2.43028e-08	0.313415	MG	1.56747	2.57466e-05	0.240128	MG
chr12:23605063-23605563	bambia	0.643431724624684	bambia::Inter;jcada::Inter	1.70327	0.192704	0.0367547	MG	2.80246	0.0172235	0.0686748	MG
chr12:23605063-23605563	jcada	0.643431724624684	bambia::Inter;jcada::Inter	1.70327	0.192704	0.0367547	MG	2.80246	0.0172235	0.0686748	MG
chr12:23621196-23621696	bambia	0.741464753773682	bambia::Inter;jcada::Inter	3.42223	0.0202867	0.104096	MG	2.34659	0.114258	0.0590875	MG
chr12:23621196-23621696	jcada	0.741464753773682	bambia::Inter;jcada::Inter	3.42223	0.0202867	0.104096	MG	2.34659	0.114258	0.0590875	MG
chr12:23641018-23641518	bambia	0.868029250968393	bambia::Inter;jcada::Inter	1.78572	0.00143228	0.164475	MG	2.17347	8.00174e-07	0.180531	MG
chr12:23641018-23641518	jcada	0.868029250968393	bambia::Inter;jcada::Inter	1.78572	0.00143228	0.164475	MG	2.17347	8.00174e-07	0.180531	MG
chr12:23641523-23642023	bambia	0.756573611469281	bambia::Inter;jcada::Inter	2.47835	0.0120821	0.0972377	MG	2.22284	0.00152835	0.0547576	MG
chr12:23641523-23642023	jcada	0.756573611469281	bambia::Inter;jcada::Inter	2.47835	0.0120821	0.0972377	MG	2.22284	0.00152835	0.0547576	MG
chr12:23673013-23673513	bambia	0.435496838688798	bambia::Inter	0.870981	0.00832274	0.0889193	MG	0.978709	0.231987	0.0785962	MG
chr12:23762847-23763347	jcada	0.897968243625729	jcada::TSS	3.99441	1.23166e-10	0.388259	MG	2.83817	2.19292e-06	0.232501	MG
chr12:23763395-23763895	jcada	0.736692784142758	jcada::TSS	2.30404	0.00266146	0.125521	MG	1.00698	0.0190067	0.0648137	MG
chr12:23764972-23765472	jcada	0.477883701933439	jcada::Body	2.64899	0.0309017	0.0984212	MG	1.79066	0.154518	0.058229	MG
chr12:25718576-25719076	sncgb	0.649177077290191	sncgb::Inter	5.36754	7.44545e-05	0.209962	MG	1.56687	0.0100087	0.0690181	MG
chr12:25840972-25841472	bmpr1ab	0.39841754663227	bmpr1ab::Inter	1.16581	0.246137	0.0902522	MG	1.72044	0.0089539	0.11508	MG
chr12:25841621-25842121	bmpr1ab	0.336473470916933	bmpr1ab::Inter	0.371861	0.165267	0.02977	MG	1.46319	0.191378	0.104437	MG
chr12:25916328-25916828	sncgb	0.685314340214334	sncgb::TSS	0.648761	0.164784	0.0533413	MG	0.762312	0.168509	0.0416146	MG
chr12:25937864-25938364	sncgb	0.702428958849228	sncgb::Inter	2.68913	7.00571e-13	0.507432	MG	3.81747	1.08812e-11	0.393429	MG
chr12:26190435-26190935	bmpr1ab	0.568962890071671	bmpr1ab::Inter;CR854941.2::Inter	2.30695	0.0217956	0.0787874	MG	1.87675	0.00754107	0.0640289	MG
chr12:26190435-26190935	CR854941.2	0.568962890071671	bmpr1ab::Inter;CR854941.2::Inter	2.30695	0.0217956	0.0787874	MG	1.87675	0.00754107	0.0640289	MG
chr12:26264312-26264812	usp54b	0.577568859479033	usp54b::Body	3.94961	4.19885e-05	0.149074	MG	3.20765	4.04414e-05	0.147634	MG
chr12:26271194-26271694	usp54b	0.57774645197743	usp54b::Body	4.07922	0.0202367	0.144151	MG	4.14924	2.64928e-06	0.15138	MG
chr12:26352759-26353259	usp54b	0.35053041973565	usp54b::Body	1.51168	0.13966	0.0538664	MG	1.60303	0.0325613	0.112926	MG
chr12:26399045-26399545	CR854941.2	0.499642757295778	CR854941.2::Inter;usp54b::Inter	4.78679	0.00295682	0.124621	MG	2.88258	0.0376632	0.0841301	MG
chr12:26399045-26399545	usp54b	0.499642757295778	CR854941.2::Inter;usp54b::Inter	4.78679	0.00295682	0.124621	MG	2.88258	0.0376632	0.0841301	MG
chr12:29962649-29963149	BX465198.2	0.47350085115173	BX465198.2::Inter	4.37418	0.0707912	0.0397935	MG	2.1849	0.201821	0.0364055	MG
chr12:30046089-30046589	ablim1b	0.676391457094819	ablim1b::TSS	1.77539	0.000168636	0.191209	MG	1.70427	0.00013021	0.182516	MG
chr12:30062653-30063153	ablim1b	0.641044627171574	ablim1b::Body	2.02781	0.0164133	0.201068	MG	1.13098	0.00978135	0.179379	MG
chr12:30089354-30089854	ablim1b	0.673667425732321	ablim1b::Body	3.72073	1.09132e-06	0.189311	MG	2.71377	4.2435e-05	0.140086	MG
chr12:30089900-30090400	ablim1b	0.636746353837865	ablim1b::Body	3.60257	0.000494059	0.0782714	MG	4.71624	0.000148606	0.0976704	MG
chr12:30109331-30109831	ablim1b	0.71275410808582	ablim1b::TSS	0.982353	0.301352	0.0650709	MG	0.56028	0.113846	0.0631599	MG
chr12:30146351-30146851	ablim1b	0.700858677450859	ablim1b::Body	5.10896	2.06844e-17	0.58793	MG	3.36676	3.75631e-13	0.406287	MG
chr12:30148869-30149369	ablim1b	0.71479665791103	ablim1b::Body	2.71741	0.00546697	0.159523	MG	1.75797	0.00514589	0.107381	MG
chr12:30223818-30224318	ablim1b	0.605014436764025	ablim1b::Inter;BX465198.2::Inter	1.06493	0.246337	0.103407	MG	1.61991	0.00059725	0.132907	MG
chr12:30223818-30224318	BX465198.2	0.605014436764025	ablim1b::Inter;BX465198.2::Inter	1.06493	0.246337	0.103407	MG	1.61991	0.00059725	0.132907	MG
chr12:30253856-30254356	afap1l2	0.696930416883216	afap1l2::Body	4.67993	0.00723552	0.0770399	MG	2.78323	0.168509	0.0563014	MG
chr12:30262458-30262958	afap1l2	0.646188842854216	afap1l2::Body	2.75446	0.0625221	0.0937079	MG	2.202	0.0229189	0.0795557	MG
chr12:30287432-30287932	afap1l2	0.802103032188043	afap1l2::Body	4.80666	5.18387e-09	0.227619	MG	2.77791	9.05788e-13	0.326404	MG
chr12:30902990-30903490	tcf7l2	0.669762531941916	tcf7l2::Inter	2.6737	3.14027e-09	0.335898	MG	1.60769	0.00385683	0.149582	MG
chr12:30997765-30998265	tcf7l2	0.577537611886929	tcf7l2::Body	2.4748	0.000154671	0.171617	MG	4.60751	3.41556e-13	0.301218	MG
chr12:31103177-31103677	tcf7l2	0.903440254951905	tcf7l2::TSS	3.01985	1.28281e-05	0.303702	MG	1.41128	0.010961	0.138203	MG
chr12:33252686-33253186	fasn	0.395141699824737	fasn::Inter	4.6279	0.000192821	0.136054	MG	3.48494	0.000356659	0.116671	MG
chr12:33395420-33395920	fasn	0.540591507964609	fasn::TSS	1.56676	5.69346e-05	0.367582	MG	1.31107	0.000142796	0.355104	MG
chr12:33401834-33402334	fasn	0.38032082511719	fasn::Body	2.23788	0.00615353	0.0997232	MG	2.75865	0.000167223	0.195327	MG
chr12:34753021-34753521	qki2	0.670200459165732	qki2::Inter	4.46764	8.7027e-06	0.163908	MG	2.54556	5.38806e-06	0.150874	MG
chr12:34753633-34754133	qki2	0.720256681562187	qki2::Inter	2.42559	0.00282866	0.103028	MG	3.28091	2.10534e-06	0.229736	MG
chr12:34952932-34953432	qki2	0.817730279695461	qki2::TSS	1.19891	0.0014515	0.140847	MG	1.90913	6.68278e-06	0.246989	MG
chr12:34975253-34975753	qki2	0.898844884290547	qki2::Body	1.58585	0.00108942	0.174867	MG	2.47678	2.83741e-07	0.256747	MG
chr12:34985838-34986338	qki2	0.695383724918434	qki2::Body	2.48283	0.00639252	0.0666949	MG	2.42172	0.0116227	0.0845871	MG
chr12:35039033-35039533	qki2	0.756745946306833	qki2::Inter	1.22982	0.106018	0.171411	MG	2.33847	6.08125e-07	0.317237	MG
chr12:35453670-35454170	chmp6b	0.56492052773548	chmp6b::Inter	1.34288	0.102312	0.0310855	MG	2.78585	0.11161	0.0453929	MG
chr12:35605992-35606492	chmp6b	0.657397256832625	chmp6b::Body	1.59684	0.000478884	0.29314	MG	1.4725	0.000425447	0.283499	MG
chr12:35688953-35689453	chmp6b	0.595891278955326	chmp6b::Body	3.59159	0.00149503	0.131274	MG	2.36822	5.64792e-05	0.150125	MG
chr12:35832850-35833350	chmp6b	0.581441329042406	chmp6b::Inter	1.42141	0.014454	0.141237	MG	1.23966	0.177122	0.0865307	MG
chr12:43230601-43231101	ptprea	0.635869199334443	ptprea::Inter	2.88593	0.00276989	0.144993	MG	2.31047	0.000880806	0.147867	MG
chr12:43398333-43398833	ptprea	0.563886322636937	ptprea::Body	1.71221	0.0476417	0.0890291	MG	1.78544	0.00263524	0.127246	MG
chr12:43454801-43455301	ptprea	0.707497397370688	ptprea::Body	2.07334	0.000557712	0.151697	MG	1.09151	0.00381065	0.104702	MG
chr12:43466014-43466514	ptprea	0.757213897226347	ptprea::Body	3.679	1.01692e-10	0.507199	MG	2.092	1.84198e-06	0.364799	MG
chr12:43576167-43576667	ptprea	0.705176507128463	ptprea::TSS	1.33035	0.0468414	0.19541	MG	0.911446	0.223801	0.102228	MG
chr12:44879355-44879855	ADAM12	0.657071005964316	ADAM12::Inter	2.82821	0.0700033	0.087784	MG	2.07939	0.00356667	0.0741725	MG
chr12:44893181-44893681	ADAM12	0.802324940864018	ADAM12::Inter	5.35529	0.000133496	0.0805154	MG	3.42175	0.00015518	0.108338	MG
chr12:44893714-44894214	ADAM12	0.799253841564409	ADAM12::Inter	5.40986	0.00135811	0.0836973	MG	3.03921	7.83908e-05	0.104883	MG
chr12:44898855-44899355	ADAM12	0.85745783725306	ADAM12::Inter	2.67191	5.85257e-11	0.532157	MG	1.95435	1.55707e-07	0.36073	MG
chr12:44910439-44910939	ADAM12	0.860072482222428	ADAM12::Inter	2.21462	0.000366942	0.228087	MG	2.43628	1.03496e-05	0.217099	MG
chr12:44919419-44919919	ADAM12	0.926320251468431	ADAM12::Inter	4.813	5.00805e-07	0.228744	MG	4.87513	2.23272e-09	0.216769	MG
chr12:44957098-44957598	ADAM12	0.630229101896175	ADAM12::Inter	2.41987	0.0468414	0.0860634	MG	3.47959	0.0371137	0.109846	MG
chr12:45073371-45073871	ADAM12	0.847198320247692	ADAM12::Body	5.34159	2.81053e-05	0.128475	MG	3.95251	4.68405e-05	0.109221	MG
chr12:45079953-45080453	ADAM12	0.907028723995396	ADAM12::Body	2.99827	3.96522e-08	0.334522	MG	4.43765	1.99117e-12	0.321943	MG
chr12:45741528-45742028	pax2b	0.322183662601046	pax2b::Inter	1.96847	0.0474606	0.0577323	MG	3.69909	0.00285668	0.0908806	MG
chr12:45876214-45876714	pax2b	0.799736304750218	pax2b::TSS	1.93508	0.000599456	0.215115	MG	1.05027	0.0847876	0.146353	MG
chr12:4770644-4771144	mapta	0.407929622758956	mapta::Body	3.93101	0.000385079	0.159981	MG	4.32829	3.43022e-06	0.130823	MG
chr12:4785310-4785810	arhgap27	0.869284334141605	arhgap27::Inter	2.82373	5.2402e-06	0.166047	MG	4.61506	1.05504e-05	0.135577	MG
chr12:4794824-4795324	arhgap27	0.758367639274587	arhgap27::Inter	2.19346	0.000190283	0.21616	MG	1.0765	0.00665299	0.111618	MG
chr12:4990163-4990663	arhgap27	0.901983648637171	arhgap27::Body	3.15195	8.40305e-06	0.161344	MG	3.08931	1.93202e-09	0.205498	MG
chr12:4992842-4993342	arhgap27	0.906393430696953	arhgap27::Body	2.00843	2.83606e-06	0.266304	MG	2.03723	8.14797e-12	0.294561	MG
chr12:4995073-4995573	arhgap27	0.857143793923551	arhgap27::Body	2.07697	0.0222736	0.100004	MG	2.72534	0.0020973	0.0980636	MG
chr12:4997518-4998018	arhgap27	0.943499399198689	arhgap27::Body	5.28147	1.26481e-22	0.817556	MG	4.23132	4.51269e-18	0.503513	MG
chr12:4998032-4998532	arhgap27	0.719981579378665	arhgap27::Body	3.24324	0.00556926	0.0711751	MG	4.0082	0.0891575	0.0304259	MG
chr12:5250685-5251185	plce1	0.902371220681494	plce1::TSS	1.15542	0.131939	0.135509	MG	0.956023	0.0147813	0.147994	MG
chr12:5267641-5268141	plce1	0.795375846261129	plce1::Body	1.8198	0.222056	0.0614681	MG	1.85498	0.00655953	0.115935	MG
chr12:5334988-5335488	plce1	0.450567275149844	plce1::Body	5.78303	0.000342074	0.109	MG	4.14385	1.95181e-06	0.193407	MG
chr12:5650339-5650839	itga3b	0.717206429615364	itga3b::Body	3.65342	0.0274024	0.0704383	MG	4.81918	0.0253313	0.0549	MG
chr12:5662458-5662958	itga3b	0.750581030865435	itga3b::Body	3.2014	0.00604777	0.0827179	MG	1.71067	0.00549662	0.053524	MG
chr12:5663135-5663635	itga3b	0.856640553800011	itga3b::TSS	2.6299	0.0214562	0.0965657	MG	1.03978	0.0134881	0.0516445	MG
chr12:5677397-5677897	itga3b	0.852813574104662	itga3b::Inter	3.99883	3.62806e-06	0.20798	MG	4.3852	2.60703e-06	0.151603	MG
chr12:5688836-5689336	itga3b	0.902372742631774	itga3b::Inter	3.56364	3.7225e-06	0.159087	MG	2.72356	2.98959e-11	0.267795	MG
chr12:5824598-5825098	itga3b	0.477031284327635	itga3b::Inter	1.80288	0.00108942	0.215272	MG	1.63596	0.000154468	0.295237	MG
chr12:6213449-6213949	prkg1b	0.794673992398165	prkg1b::TSS	0.958784	0.20443	0.0367727	MG	1.90299	0.010125	0.0933147	MG
chr12:6463912-6464412	dkk1b	0.722265912091617	dkk1b::TSS	2.57737	0.267077	0.0754416	MG	3.5099	0.00127959	0.100132	MG
chr12:6465263-6465763	dkk1b	0.804105077008554	dkk1b::TSS	3.29527	1.75952e-10	0.327764	MG	2.28687	2.15101e-07	0.235574	MG
chr12:6482307-6482807	dkk1b	0.829060380269288	dkk1b::Inter	6.4251	1.45354e-10	0.356936	MG	5.07377	7.21609e-19	0.514918	MG
chr12:6483029-6483529	dkk1b	0.346235281454379	dkk1b::Inter	3.38407	0.0950478	0.0382196	MG	3.69385	0.0522854	0.0431332	MG
chr12:8728388-8728888	cyp26a1	0.477201767731189	cyp26a1::Inter	1.1603	0.00293574	0.219283	MG	1.3718	0.00815995	0.175591	MG
chr12:8784154-8784654	cyp26a1	0.659880364892933	cyp26a1::Inter	4.7862	1.09026e-09	0.328354	MG	2.08587	0.000237809	0.129482	MG
chr12:8835438-8835938	cyp26a1	0.478197348894727	cyp26a1::Inter	0.92135	0.155921	0.0374905	MG	1.5356	0.22671	0.0616146	MG
chr12:8841942-8842442	cyp26a1	0.784621839826908	cyp26a1::Inter	2.05956	0.00202286	0.248108	MG	1.99021	0.00711363	0.179478	MG
chr12:8957604-8958104	cyp26a1	0.662063861430711	cyp26a1::TSS	2.12157	0.0699132	0.0314999	MG	2.92926	0.0045426	0.0467753	MG
chr12:8958164-8958664	cyp26a1	0.892710725079637	cyp26a1::TSS	2.83684	0.000133018	0.165311	MG	3.71997	0.000144258	0.179696	MG
chr12:8959340-8959840	cyp26a1	0.549138301958309	cyp26a1::TSS	4.24691	0.0707912	0.0362633	MG	2.96725	0.00946828	0.0655848	MG
chr13:10256149-10256649	BX537274.1	0.822403200778083	BX537274.1::Inter	1.56175	0.00639464	0.201152	MG	1.78627	0.000808093	0.216015	MG
chr13:10264532-10265032	BX537274.1	0.819090690376488	BX537274.1::Inter	0.578574	0.0293396	0.12511	MG	1.19718	0.00059167	0.33405	MG
chr13:10298821-10299321	BX537274.1	0.618749863339653	BX537274.1::Inter	1.93154	0.0218166	0.095289	MG	1.65437	0.191378	0.055395	MG
chr13:10311074-10311574	BX537274.1	0.880345683567471	BX537274.1::Inter	1.38133	1.15962e-05	0.250606	MG	1.54122	0.000123639	0.269186	MG
chr13:10311589-10312089	BX537274.1	0.878241022955817	BX537274.1::Inter	0.725583	0.01251	0.12172	MG	0.683682	0.0120481	0.115272	MG
chr13:10356832-10357332	BX537274.1	0.804554857100612	BX537274.1::Inter	1.48184	0.00291041	0.239831	MG	1.6241	1.0031e-07	0.368213	MG
chr13:10366299-10366799	BX537274.1	0.55070255251528	BX537274.1::Inter	2.64128	0.0145866	0.0853076	MG	4.28165	0.00072564	0.124729	MG
chr13:12527816-12528316	rrh	0.934025158980401	rrh::TSS	3.24425	2.7919e-08	0.421676	MG	3.3918	1.57097e-10	0.327214	MG
chr13:16103700-16104200	anxa11a	0.557896526106511	anxa11a::Inter;mocos::Inter	4.39986	0.00294316	0.0822718	MG	2.97211	0.0344154	0.0346005	MG
chr13:16103700-16104200	mocos	0.557896526106511	anxa11a::Inter;mocos::Inter	4.39986	0.00294316	0.0822718	MG	2.97211	0.0344154	0.0346005	MG
chr13:16177883-16178383	vwc2	0.462447054237849	vwc2::Body	1.94285	0.0426929	0.0699147	MG	1.85106	0.0175017	0.0923838	MG
chr13:16263577-16264077	anxa11a	0.74740364211193	anxa11a::Inter;mocos::Inter	3.6953	0.00104205	0.114522	MG	2.8865	0.00137393	0.102188	MG
chr13:16263577-16264077	mocos	0.74740364211193	anxa11a::Inter;mocos::Inter	3.6953	0.00104205	0.114522	MG	2.8865	0.00137393	0.102188	MG
chr13:16279026-16279526	anxa11a	0.509743700835958	anxa11a::TSS	1.34395	0.0468414	0.041563	MG	1.69694	0.0998219	0.0519314	MG
chr13:16280400-16280900	anxa11a	ND	anxa11a::TSS	3.4971	0.222056	0.020748	MG	2.74456	0.266429	0.0114956	MG
chr13:21911733-21912233	ndst2a	0.784703812160086	ndst2a::Inter	1.5585	0.00125292	0.168368	MG	1.23135	0.0785599	0.158703	MG
chr13:21960593-21961093	ndst2a	0.779699916534568	ndst2a::Inter	1.36114	0.0831871	0.172745	MG	1.50931	4.26023e-05	0.234529	MG
chr13:22044279-22044779	ndst2a	0.612533045221345	ndst2a::Inter	1.23315	0.311481	0.0404619	MG	1.368	0.234027	0.0491941	MG
chr13:22044848-22045348	ndst2a	0.774216552253535	ndst2a::Inter	2.39634	6.11592e-05	0.151436	MG	2.23169	5.03797e-06	0.162914	MG
chr13:22067234-22067734	ndst2a	0.50042259501688	ndst2a::Inter	2.87623	0.00883837	0.104265	MG	2.60553	0.0119588	0.100489	MG
chr13:22476453-22476953	ldb3a	0.753385448777369	ldb3a::TSS	0.716377	0.0875694	0.270656	MG	0.51045	0.165181	0.226385	MG
chr13:22478541-22479041	ldb3a	0.402063743928337	ldb3a::TSS	2.81713	0.0208248	0.0975028	MG	3.1141	0.057447	0.0738213	MG
chr13:22598913-22599413	bmpr1aa	0.858866568567901	bmpr1aa::Body	2.16179	4.62999e-05	0.227774	MG	1.4599	0.000701264	0.154165	MG
chr13:22600630-22601130	bmpr1aa	0.905770769778629	bmpr1aa::Body	2.11893	8.76588e-13	0.605924	MG	1.65712	1.9622e-09	0.539798	MG
chr13:22627965-22628465	bmpr1aa	0.340049179665135	bmpr1aa::Inter;ldb3a::Inter	2.12369	0.242225	0.0655096	MG	1.73344	0.121777	0.0286512	MG
chr13:22627965-22628465	ldb3a	0.340049179665135	bmpr1aa::Inter;ldb3a::Inter	2.12369	0.242225	0.0655096	MG	1.73344	0.121777	0.0286512	MG
chr13:22651745-22652245	ldb3a	0.569014299359129	ldb3a::Inter	2.62539	0.00423547	0.118203	MG	2.50797	0.00986657	0.122209	MG
chr13:22658854-22659354	sncga	0.683776206108652	sncga::TSS	3.5406	3.16664e-08	0.333943	MG	1.81315	2.29875e-05	0.156275	MG
chr13:22660703-22661203	sncga	0.623738315247035	sncga::Body	2.46679	0.000147011	0.191264	MG	2.11208	7.15509e-06	0.167511	MG
chr13:22661741-22662241	sncga	0.557259371694296	sncga::Body	4.88639	0.000187328	0.135214	MG	4.43778	2.84434e-05	0.144067	MG
chr13:22695696-22696196	glud1a	0.6910283815137	glud1a::Body	2.0634	0.0222224	0.111484	MG	3.27048	9.0956e-05	0.10552	MG
chr13:22698601-22699101	glud1a	0.557343893874885	glud1a::TSS	1.30158	0.00973848	0.119121	MG	0.744207	0.119799	0.0736206	MG
chr13:22739706-22740206	bmpr1aa	0.680865519026254	bmpr1aa::Inter	2.01318	0.0223887	0.0997193	MG	3.67072	0.000120958	0.111451	MG
chr13:22751502-22752002	bmpr1aa	0.404796576449881	bmpr1aa::Inter	2.48222	0.326844	0.0421079	MG	2.01028	0.137224	0.0600777	MG
chr13:22754495-22754995	bmpr1aa	0.753851053089543	bmpr1aa::Inter	1.9463	0.0574724	0.101608	MG	2.18873	0.000253554	0.147799	MG
chr13:23004641-23005141	hk1	0.571241340887909	hk1::Body	3.60257	1.49674e-05	0.203135	MG	1.61723	0.0348529	0.0647659	MG
chr13:26835345-26835845	ccdc85a	0.66329958753438	ccdc85a::Inter	5.19355	4.22395e-06	0.165387	MG	4.3013	3.44048e-08	0.205848	MG
chr13:26843780-26844280	ccdc85a	0.726591356053269	ccdc85a::Inter	3.76202	0.00167213	0.153919	MG	2.5492	5.84229e-05	0.182061	MG
chr13:27038145-27038645	ccdc85a	0.812192103299822	ccdc85a::TSS	1.21834	5.75657e-05	0.379584	MG	0.691215	0.0458395	0.185556	MG
chr13:27511688-27512188	kcnq5a	0.792133532905312	kcnq5a::Body	5.32106	0.00534072	0.0785806	MG	1.85118	0.0484455	0.0643677	MG
chr13:27620819-27621319	kcnq5a	0.678469002712831	kcnq5a::TSS	2.20007	0.0202367	0.0973894	MG	0.73208	0.162298	0.0490677	MG
chr13:27623367-27623867	kcnq5a	0.656107611851605	kcnq5a::Inter	2.84591	0.270299	0.0339201	MG	3.44391	0.0787462	0.0450507	MG
chr13:28920309-28920809	unc5b	0.412991436596957	unc5b::Inter	2.60729	1.73069e-12	0.630355	MG	1.48119	1.37974e-08	0.386152	MG
chr13:28923016-28923516	unc5b	0.467556698664687	unc5b::Inter	2.88135	9.22444e-10	0.429483	MG	3.20773	2.87398e-19	0.455163	MG
chr13:28923609-28924109	unc5b	0.374148305797959	unc5b::Inter	1.75356	5.82282e-06	0.430054	MG	1.68386	4.16663e-11	0.418114	MG
chr13:29558595-29559095	pax2a	0.734202344942247	pax2a::Inter	2.77438	0.13966	0.0365964	MG	4.37741	0.0253313	0.0398872	MG
chr13:29559766-29560266	pax2a	0.789690822427543	pax2a::Inter	1.99033	4.90804e-07	0.27933	MG	1.85447	2.61035e-05	0.292377	MG
chr13:29571276-29571776	pax2a	0.727879925446174	pax2a::Inter	2.35794	0.00740726	0.164096	MG	1.74689	0.0764105	0.0821033	MG
chr13:29601828-29602328	pax2a	0.69767172398803	pax2a::Inter	2.86588	0.198245	0.0366511	MG	4.60481	0.0521317	0.0693064	MG
chr13:29633353-29633853	pax2a	0.766598532418431	pax2a::Inter	2.43246	0.145068	0.0460892	MG	1.26925	0.130314	0.0413731	MG
chr13:29770644-29771144	pax2a	0.75744151260466	pax2a::TSS	1.30922	0.00107533	0.171505	MG	2.39045	8.92857e-06	0.237627	MG
chr13:29779056-29779556	pax2a	0.742554175582036	pax2a::TSS	4.57056	2.95275e-05	0.155428	MG	2.47809	0.0842838	0.0506768	MG
chr13:29797964-29798464	pax2a	0.812356156470448	pax2a::Body	2.52492	3.46847e-05	0.308814	MG	1.95942	1.34674e-06	0.277976	MG
chr13:29899446-29899946	pax2a	0.660851811517392	pax2a::Inter	4.35494	5.85065e-05	0.169815	MG	2.68306	0.000268558	0.111263	MG
chr13:30441738-30442238	zcchc24	0.443905423422093	zcchc24::Inter	2.46521	0.0707314	0.0881483	MG	1.45025	0.257449	0.0452272	MG
chr13:30621887-30622387	zcchc24	0.772320121670804	zcchc24::Body	3.43227	0.000408743	0.252832	MG	2.37727	5.00508e-08	0.220884	MG
chr13:30624903-30625403	zcchc24	0.801237767915284	zcchc24::Body	3.0754	0.200482	0.045723	MG	4.19108	0.0587516	0.0348103	MG
chr13:33386193-33386693	btbd6a	0.599479707403149	btbd6a::Inter	3.13824	0.00436971	0.184884	MG	2.75609	2.98928e-05	0.152235	MG
chr13:33398707-33399207	btbd6a	0.696928137260365	btbd6a::TSS	2.35961	0.000886822	0.282729	MG	1.77622	9.45108e-05	0.208539	MG
chr13:33408989-33409489	btbd6a	0.717391215620487	btbd6a::Inter	4.45912	1.64893e-13	0.443846	MG	3.8822	7.3785e-15	0.402309	MG
chr13:33412842-33413342	btbd6a	0.509287553619818	btbd6a::Inter	1.01883	0.00108691	0.104419	MG	2.5083	1.09711e-05	0.229467	MG
chr13:33633545-33634045	btbd6a	0.495416462060569	btbd6a::Inter	3.04552	0.00889347	0.100798	MG	4.17674	0.0379525	0.104949	MG
chr13:33683683-33684183	cst3	0.565271240056353	cst3::TSS	0.900701	0.2128	0.200195	MG	0.724875	0.0941461	0.108594	MG
chr13:34545958-34546458	ism1	0.506481388087029	ism1::Inter	3.34224	0.0636422	0.0577991	MG	2.43609	0.153445	0.0522902	MG
chr13:34793506-34794006	ism1	0.778278437096423	ism1::TSS	3.5373	0.000188762	0.143444	MG	1.53283	0.0034563	0.0678447	MG
chr13:34894924-34895424	ism1	0.604071931317368	ism1::Inter	4.79547	0.301352	0.0539723	MG	1.14769	0.086738	0.0466014	MG
chr13:34933920-34934420	ism1	0.84254639747492	ism1::Inter	3.07979	2.44968e-06	0.310568	MG	3.9381	1.0108e-11	0.27204	MG
chr13:35096803-35097303	jag1b	0.484414498446241	jag1b::Inter	5.77595	0.000213385	0.108456	MG	2.27136	0.0110866	0.0572759	MG
chr13:35097314-35097814	jag1b	0.416407142323183	jag1b::Inter	3.49021	0.0178751	0.0589722	MG	2.09555	0.0182953	0.056018	MG
chr13:35098000-35098500	jag1b	0.362952113394623	jag1b::Inter	1.73319	0.022165	0.0837764	MG	2.27682	0.0848709	0.0427231	MG
chr13:35100729-35101229	jag1b	0.627449232442363	jag1b::Inter	7.4699	1.31429e-09	0.355407	MG	4.62282	4.55974e-10	0.244491	MG
chr13:35180717-35181217	jag1b	0.785683480047952	jag1b::Inter	3.60489	8.40972e-07	0.24981	MG	2.32421	1.56091e-06	0.212502	MG
chr13:35205957-35206457	jag1b	0.728889260311382	jag1b::Inter	2.87965	0.042135	0.0372667	MG	3.02703	9.86676e-05	0.11763	MG
chr13:35341535-35342035	jag1b	0.728226195283096	jag1b::Body	1.92092	0.0645344	0.177156	MG	1.64984	0.11243	0.136279	MG
chr13:35357314-35357814	jag1b	0.567732731782269	jag1b::Body	4.15484	0.0707912	0.0338967	MG	3.10077	0.00601508	0.0413621	MG
chr13:35359361-35359861	jag1b	0.504541156518464	jag1b::Body	2.5323	0.13966	0.027882	MG	3.41721	0.168509	0.0316743	MG
chr13:3536203-3536703	qkib	0.666035180065549	qkib::Inter	2.04066	0.0163006	0.1313	MG	1.83469	0.00852845	0.0934417	MG
chr13:35463822-35464322	jag1b	0.728515749863563	jag1b::Inter	2.25974	0.0309017	0.0901773	MG	1.44694	0.01894	0.0685906	MG
chr13:3554333-3554833	qkib	0.621517002477429	qkib::Inter	0.843291	0.301352	0.0526279	MG	1.39947	0.0389244	0.0873125	MG
chr13:3643585-3644085	qkib	0.756575267887222	qkib::Inter	1.90207	0.0149786	0.0746278	MG	2.67046	0.000626898	0.122286	MG
chr13:3648132-3648632	qkib	0.887460123875799	qkib::Inter	3.24431	2.26456e-06	0.248662	MG	3.12313	1.10167e-09	0.345497	MG
chr13:3666408-3666908	qkib	0.902481078828273	qkib::TSS	1.95367	6.07521e-06	0.268746	MG	2.34944	3.38307e-06	0.201188	MG
chr13:36861218-36861718	pygl	0.664043796325516	pygl::Body	4.46418	0.0178006	0.088561	MG	4.42727	0.0386526	0.0413609	MG
chr13:36862800-36863300	pygl	0.925117073738639	pygl::TSS	2.87521	1.32138e-07	0.359269	MG	2.10768	2.10592e-07	0.337553	MG
chr13:39063256-39063756	FRMD1	0.371981970702099	FRMD1::Inter	0.941833	0.118122	0.0469435	MG	2.23955	0.0337909	0.0798873	MG
chr13:39212081-39212581	FRMD1	0.32318861481649	FRMD1::Inter	3.16391	0.0275834	0.0586512	MG	3.54364	0.0223521	0.0616731	MG
chr13:39250468-39250968	FRMD1	0.378118674576225	FRMD1::Body	2.61202	0.0468414	0.0957691	MG	1.63258	0.0386526	0.0625721	MG
chr13:40815447-40815947	prkg1a	0.622952631161398	prkg1a::TSS	3.26566	0.000615414	0.0804073	MG	3.07521	0.000584135	0.0864326	MG
chr13:40943655-40944155	prkg1a	0.565984813751856	prkg1a::Body	2.98864	0.00263262	0.113489	MG	2.26089	0.00964907	0.0983051	MG
chr13:41999408-41999908	cyp1b1	0.870439270282794	cyp1b1::Inter	2.327	5.82282e-06	0.20301	MG	2.70279	9.88579e-06	0.236422	MG
chr13:42160273-42160773	cpeb3	0.747719784740254	cpeb3::Inter;cyp1b1::Inter	3.19932	0.00613474	0.121291	MG	3.4695	0.000139066	0.126189	MG
chr13:42160273-42160773	cyp1b1	0.747719784740254	cpeb3::Inter;cyp1b1::Inter	3.19932	0.00613474	0.121291	MG	3.4695	0.000139066	0.126189	MG
chr13:42419221-42419721	cpeb3	0.768768348574181	cpeb3::Body	3.76411	0.00475565	0.0940807	MG	2.98564	0.00463587	0.0600347	MG
chr13:42724396-42724896	capn1a	0.707653151573109	capn1a::TSS	0.915931	0.145888	0.0925365	MG	1.29421	0.132369	0.124658	MG
chr13:44874579-44875079	CR376783.1	0.88494067596492	CR376783.1::Inter	2.2488	0.000849014	0.183743	MG	2.0553	0.00686602	0.134782	MG
chr13:44883780-44884280	CR376783.1	0.785304953774472	CR376783.1::Inter	2.20443	0.0315504	0.0607069	MG	2.21179	0.0339527	0.0821071	MG
chr13:44995229-44995729	CR376783.1	0.690395696526331	CR376783.1::Body	1.47203	0.308327	0.0549021	MG	2.33116	0.0488853	0.0675268	MG
chr13:44997082-44997582	CR376783.1	0.856697174838168	CR376783.1::TSS	2.80281	0.000312725	0.211165	MG	2.92558	0.00102018	0.15259	MG
chr13:45172454-45172954	CR376783.1	0.852729770075889	CR376783.1::Inter	3.05946	8.54382e-06	0.255323	MG	2.51813	7.29574e-07	0.197596	MG
chr13:45182823-45183323	CR376783.1	0.788239200420867	CR376783.1::Inter	2.82032	0.0468414	0.0671041	MG	2.6957	0.0348475	0.0691248	MG
chr13:45359769-45360269	rsrp1	0.545983733291833	rsrp1::Inter	4.84661	0.00135811	0.0559924	MG	3.78216	0.00587953	0.0495006	MG
chr13:45474484-45474984	rsrp1	0.523588063770134	rsrp1::TSS	1.44112	0.0545889	0.153717	MG	1.17337	0.025727	0.200791	MG
chr13:46364090-46364590	fgfr2	0.681550468876161	fgfr2::Body	2.56066	0.0639287	0.0529787	MG	1.8162	0.0939106	0.0582747	MG
chr13:46365630-46366130	fgfr2	0.762298058268125	fgfr2::Body	2.74173	0.0424318	0.0483345	MG	2.671	0.000850372	0.0822763	MG
chr13:46379634-46380134	fgfr2	0.885360373094501	fgfr2::Body	2.33162	3.76781e-07	0.1843	MG	3.48033	6.02063e-08	0.240523	MG
chr13:46398295-46398795	fgfr2	0.753572752061394	fgfr2::Body	2.307	0.0468414	0.0767448	MG	3.47481	0.000752253	0.0877478	MG
chr13:46429178-46429678	fgfr2	0.837675937406897	fgfr2::TSS	1.83241	0.00035451	0.268759	MG	1.30969	0.012262	0.174827	MG
chr13:4643531-4644031	mcu	0.495487987958219	mcu::Inter	3.27242	0.0468414	0.104342	MG	3.1316	0.0386526	0.0930953	MG
chr13:47515887-47516387	mertka	0.762356536904334	mertka::Inter	3.98049	0.0468414	0.0298087	MG	2.85176	0.00722115	0.0693822	MG
chr13:47623909-47624409	mertka	0.710605824297893	mertka::TSS	2.35156	0.000671459	0.185609	MG	0.957756	0.168509	0.0683297	MG
chr13:47646976-47647476	mertka	0.77064709441941	mertka::Body	5.67463	0.000543967	0.100963	MG	2.47745	0.00441262	0.0996672	MG
chr13:47650238-47650738	mertka	0.912866158138782	mertka::Body	3.90693	4.70863e-07	0.3451	MG	3.82044	2.41914e-12	0.276587	MG
chr13:47654142-47654642	mertka	0.885075925577182	mertka::Body	3.3805	2.88731e-05	0.161634	MG	5.37204	3.45174e-09	0.225635	MG
chr13:4831723-4832223	mcu	0.612141289798946	mcu::Body	1.90738	0.26086	0.0656393	MG	3.92169	0.000302728	0.117688	MG
chr13:4847483-4847983	mcu	0.737973901868841	mcu::TSS	1.93099	0.00846466	0.176249	MG	2.31659	0.00154912	0.160221	MG
chr13:4848416-4848916	mcu	0.701118023498335	mcu::TSS	2.01195	0.00038046	0.267498	MG	1.49916	0.000270658	0.1826	MG
chr13:4848960-4849460	mcu	0.695033701965956	mcu::TSS	1.8287	1.45763e-05	0.407111	MG	1.68314	7.32902e-08	0.319348	MG
chr13:4878563-4879063	mcu	0.473799212623095	mcu::Inter;psap::Inter	2.94524	0.0869904	0.11624	MG	1.95086	0.0319863	0.0899225	MG
chr13:4878563-4879063	psap	0.473799212623095	mcu::Inter;psap::Inter	2.94524	0.0869904	0.11624	MG	1.95086	0.0319863	0.0899225	MG
chr13:49969898-49970398	nid1a	0.746158843672486	nid1a::Inter	3.04972	0.270299	0.0337909	MG	4.88405	0.00270403	0.0575175	MG
chr13:5013408-5013908	psap	0.550049123241304	psap::TSS	3.23086	0.00259001	0.13627	MG	2.27923	0.000736767	0.138045	MG
chr13:5751276-5751776	spred2b	0.560224983632522	spred2b::Inter	1.49011	0.00655504	0.0909941	MG	2.88416	4.11123e-07	0.188219	MG
chr13:5759742-5760242	spred2b	0.65491065253138	spred2b::Inter	3.61215	3.23983e-07	0.295084	MG	3.06043	6.47914e-09	0.276704	MG
chr13:5781378-5781878	spred2b	0.566228192871327	spred2b::Inter	2.29012	0.000270993	0.207674	MG	1.41845	0.000186446	0.141852	MG
chr13:6130516-6131016	spred2b	0.50927221778339	spred2b::Inter	1.53168	0.0955536	0.0893985	MG	1.29655	0.039609	0.113137	MG
chr13:7207438-7207938	ninl	0.844123952680063	ninl::Body	2.50826	1.55366e-07	0.247364	MG	4.74766	3.21648e-15	0.380113	MG
chr13:7217373-7217873	ninl	0.868614985261577	ninl::Body	5.15804	3.85891e-09	0.31683	MG	3.64951	8.76892e-11	0.339814	MG
chr13:7222856-7223356	ninl	0.808758387355639	ninl::Body	4.35863	0.000105055	0.212997	MG	2.53369	0.000428044	0.118815	MG
chr13:8443644-8444144	epas1b	0.911965325919646	epas1b::Body	3.19832	2.2456e-06	0.234261	MG	1.3981	4.55958e-06	0.212805	MG
chr13:8444566-8445066	epas1b	0.686458719802528	epas1b::Body	2.49437	0.301352	0.0802701	MG	2.09634	0.139296	0.0449702	MG
chr13:8446094-8446594	epas1b	0.867715304155813	epas1b::TSS	2.05954	0.00656918	0.181524	MG	1.95753	0.000611807	0.201433	MG
chr13:8632637-8633137	epas1b	0.744566197479726	epas1b::Inter	2.5101	0.00083023	0.177295	MG	1.89976	0.0267694	0.189566	MG
chr13:8649019-8649519	epas1b	0.839718826101857	epas1b::Inter	2.77298	3.1482e-05	0.199816	MG	2.86138	6.96542e-07	0.275475	MG
chr13:8663498-8663998	epas1b	0.78945478478305	epas1b::Inter	4.85265	0.000119732	0.150843	MG	3.8101	0.00925509	0.0658305	MG
chr13:928768-929268	perp	0.443141310383378	perp::Inter	0.68537	0.270299	0.0438563	MG	1.23738	0.0587516	0.0892769	MG
chr13:937826-938326	perp	0.385691014389705	perp::Inter	2.35981	0.00757443	0.056025	MG	3.96092	0.0340553	0.0600021	MG
chr14:1002800-1003300	si:ch1073-303k11.2	0.490216920458672	si:ch1073-303k11.2::Inter	1.26671	0.301352	0.0278414	MG	2.07439	0.135418	0.0389767	MG
chr14:1003337-1003837	si:ch1073-303k11.2	0.600003384445574	si:ch1073-303k11.2::Inter	2.31046	0.0326239	0.0828565	MG	2.41739	0.203157	0.0447001	MG
chr14:10469512-10470012	lpar4	0.752862155939683	lpar4::Inter	4.16348	0.00352524	0.155175	MG	2.97681	0.00059059	0.112464	MG
chr14:10472649-10473149	lpar4	0.743205966329925	lpar4::Inter	3.14802	0.0133483	0.0825476	MG	3.20424	0.000501994	0.0950267	MG
chr14:10475417-10475917	lpar4	0.8372383316976	lpar4::Inter	3.93306	0.00011104	0.21468	MG	3.76717	0.000189318	0.105841	MG
chr14:10477237-10477737	lpar4	0.909446832988015	lpar4::Inter	3.84217	1.26816e-06	0.232229	MG	3.87337	3.75631e-13	0.279469	MG
chr14:10490004-10490504	lpar4	0.836153931522229	lpar4::Body	2.86222	0.000157534	0.139383	MG	3.11332	0.00341934	0.125356	MG
chr14:10503625-10504125	lpar4	0.739181653508244	lpar4::TSS	3.11603	0.00872422	0.105964	MG	2.8676	0.00142765	0.128358	MG
chr14:1108300-1108800	si:ch1073-303k11.2	0.809320821820957	si:ch1073-303k11.2::Inter	2.04559	6.78593e-09	0.47352	MG	2.57796	2.48955e-09	0.531921	MG
chr14:1111025-1111525	si:ch1073-303k11.2	0.832745654070378	si:ch1073-303k11.2::TSS	2.53592	0.000337869	0.160699	MG	2.57668	0.000329319	0.162724	MG
chr14:12316196-12316696	si:ch211-125c23.3	ND	si:ch211-125c23.3::TSS	4.28584	0.155921	0.0373102	MG	3.82955	0.0249131	0.0739523	MG
chr14:16606707-16607207	mgat4b	0.47321254776774	mgat4b::Body	3.57643	0.000605892	0.120212	MG	2.47573	0.00183392	0.14648	MG
chr14:16902052-16902552	mgat4b	0.434121502650353	mgat4b::Inter	2.56888	0.000416816	0.201027	MG	4.73394	3.27831e-08	0.242903	MG
chr14:20342375-20342875	aff2	0.841640620698081	aff2::TSS	2.14868	1.15169e-05	0.221506	MG	0.955654	0.009294	0.109953	MG
chr14:20360788-20361288	aff2	0.69949012162216	aff2::Body	4.19048	0.000494059	0.134799	MG	6.43653	2.02174e-07	0.17261	MG
chr14:20365804-20366304	aff2	0.616890484678059	aff2::Body	5.49048	0.00534072	0.0886231	MG	3.16242	3.84097e-05	0.118516	MG
chr14:20470059-20470559	aff2	0.719433564313912	aff2::Body	2.67472	3.49e-05	0.169196	MG	1.42355	0.104035	0.0835591	MG
chr14:20475844-20476344	aff2	0.649439889702963	aff2::Body	2.85643	0.000190986	0.155791	MG	2.88599	0.00230661	0.156292	MG
chr14:20482753-20483253	aff2	0.7134290932174	aff2::Body	2.51752	0.000139791	0.187591	MG	2.69946	4.6124e-06	0.179104	MG
chr14:20485498-20485998	aff2	0.601670872800967	aff2::Body	1.96456	0.0984483	0.0523612	MG	1.99726	0.20835	0.0397581	MG
chr14:20503902-20504402	aff2	0.757546827292389	aff2::Body	3.26526	6.69565e-10	0.33599	MG	2.61595	5.51837e-10	0.262967	MG
chr14:24214697-24215197	stc2a	0.490662506942976	stc2a::TSS	1.34716	0.0633911	0.0853043	MG	1.4897	0.13344	0.0778381	MG
chr14:24232744-24233244	stc2a	0.492846847923432	stc2a::Inter	0.965562	0.262507	0.0720781	MG	1.3336	0.135885	0.0611178	MG
chr14:25156610-25157110	htr4	0.592084004863399	htr4::Body	3.17272	0.198245	0.0276515	MG	5.1448	0.000269248	0.0693115	MG
chr14:25186214-25186714	htr4	0.70719691281442	htr4::Body	2.51922	0.0448695	0.130464	MG	1.23587	0.0405235	0.0958057	MG
chr14:25204773-25205273	htr4	0.81787503119804	htr4::Body	3.26374	0.000198461	0.128336	MG	2.5679	2.33921e-05	0.128745	MG
chr14:25308880-25309380	htr4	0.763091907661948	htr4::TSS	1.28517	0.037668	0.0934001	MG	1.25881	0.0112129	0.0861632	MG
chr14:25382065-25382565	slc25a48	0.760047366980861	slc25a48::Inter	5.31034	0.000859735	0.0779838	MG	5.27669	1.20193e-06	0.132377	MG
chr14:25417650-25418150	htr4	0.664259810752802	htr4::Inter;slc25a48::Inter	5.16944	0.00837584	0.0705403	MG	5.40245	0.000680116	0.083258	MG
chr14:25417650-25418150	slc25a48	0.664259810752802	htr4::Inter;slc25a48::Inter	5.16944	0.00837584	0.0705403	MG	5.40245	0.000680116	0.083258	MG
chr14:25597949-25598449	slc25a48	0.725016824550967	slc25a48::TSS	2.59229	0.0468414	0.0505201	MG	2.81999	0.00751932	0.0905631	MG
chr14:25598781-25599281	slc25a48	0.803843648053078	slc25a48::TSS	4.33353	0.00471242	0.106453	MG	3.44139	0.000143179	0.119477	MG
chr14:25617895-25618395	glra1	0.662028696521596	glra1::Inter;slc25a48::Inter	2.50462	0.00648195	0.108453	MG	2.22965	0.00429162	0.0980822	MG
chr14:25617895-25618395	slc25a48	0.662028696521596	glra1::Inter;slc25a48::Inter	2.50462	0.00648195	0.108453	MG	2.22965	0.00429162	0.0980822	MG
chr14:25831981-25832481	glra1	0.712403408503278	glra1::Body	2.26412	6.95547e-09	0.335715	MG	3.8009	9.64623e-11	0.278523	MG
chr14:25955914-25956414	sparc	0.641705680141497	sparc::TSS	1.36417	0.164566	0.0858421	MG	2.27156	0.0197788	0.139947	MG
chr14:25956591-25957091	sparc	0.837496971909217	sparc::TSS	3.07338	0.0277716	0.0863664	MG	3.83092	0.000131424	0.109733	MG
chr14:25965920-25966420	glra1	0.640141060075722	glra1::Inter	3.56092	0.00029932	0.164455	MG	2.91621	2.18138e-07	0.233505	MG
chr14:26011370-26011870	glra1	0.600542829192643	glra1::Inter	4.87534	0.000187828	0.145501	MG	2.35857	0.000482556	0.163937	MG
chr14:26041201-26041701	glra1	0.326946285891143	glra1::Inter	2.95059	0.0309017	0.0644557	MG	2.42327	0.0389244	0.0527916	MG
chr14:26418101-26418601	arap3	0.625624768354438	arap3::Inter	4.44928	0.0113579	0.0810555	MG	4.09122	0.000183876	0.117437	MG
chr14:26552863-26553363	ahnak	0.574784470535695	ahnak::Inter;arap3::Inter	1.72432	0.301352	0.0493113	MG	1.67072	0.153948	0.0709399	MG
chr14:26552863-26553363	arap3	0.574784470535695	ahnak::Inter;arap3::Inter	1.72432	0.301352	0.0493113	MG	1.67072	0.153948	0.0709399	MG
chr14:26567217-26567717	arap3	0.762743393850135	arap3::Body	1.7131	0.295171	0.0563042	MG	1.89433	0.0224997	0.0733316	MG
chr14:26733816-26734316	ahnak	0.696601907545367	ahnak::Inter;arap3::Inter	2.90124	0.198245	0.0393489	MG	1.10388	0.215712	0.0212062	MG
chr14:26733816-26734316	arap3	0.696601907545367	ahnak::Inter;arap3::Inter	2.90124	0.198245	0.0393489	MG	1.10388	0.215712	0.0212062	MG
chr14:26740929-26741429	ahnak	0.79346589159292	ahnak::Inter;arap3::Inter	2.69115	0.0468414	0.117807	MG	1.05022	0.0623638	0.0627225	MG
chr14:26740929-26741429	arap3	0.79346589159292	ahnak::Inter;arap3::Inter	2.69115	0.0468414	0.117807	MG	1.05022	0.0623638	0.0627225	MG
chr14:26759054-26759554	ahnak	0.881389441031723	ahnak::TSS	2.96127	0.00031088	0.125511	MG	4.52236	2.36067e-07	0.153945	MG
chr14:26760229-26760729	ahnak	0.847149382892576	ahnak::TSS	3.44024	0.000188364	0.130394	MG	2.9372	0.000246728	0.0964698	MG
chr14:26761060-26761560	ahnak	ND	ahnak::TSS	1.22487	0.270299	0.0236171	MG	2.14646	0.234027	0.0274292	MG
chr14:28142597-28143097	mid2	0.771987820635777	mid2::Inter	1.36067	0.224251	0.0570864	MG	0.477969	0.0378464	0.0373161	MG
chr14:28177408-28177908	mid2	0.517763866810473	mid2::Inter	4.73474	5.65615e-05	0.228294	MG	2.34406	6.96542e-07	0.145942	MG
chr14:30846765-30847265	mbnl3	0.542571947203489	mbnl3::Inter	4.72979	8.63042e-06	0.183844	MG	2.08332	0.0030044	0.106945	MG
chr14:30852337-30852837	mbnl3	0.387716682336752	mbnl3::Inter	0.640344	0.301352	0.090481	MG	0.816279	0.226413	0.0688639	MG
chr14:30860442-30860942	mbnl3	0.515769396241377	mbnl3::Inter	3.81196	0.0273625	0.0638914	MG	2.25081	0.0253313	0.0720086	MG
chr14:30936901-30937401	mbnl3	0.397898784199283	mbnl3::Inter	1.93882	0.282242	0.0553348	MG	2.32233	0.0522584	0.0764149	MG
chr14:31044298-31044798	mbnl3	0.441683368166877	mbnl3::Body	4.68934	0.00837584	0.0500014	MG	4.20944	0.00236318	0.0870931	MG
chr14:3226654-3227154	pdgfrb	0.702279058344415	pdgfrb::Body	1.74137	0.301352	0.0539239	MG	4.26933	0.0220951	0.0684433	MG
chr14:3229483-3229983	pdgfrb	0.880849091181183	pdgfrb::TSS	4.06137	1.88964e-07	0.243576	MG	1.94317	7.66132e-07	0.163708	MG
chr14:32639356-32639856	BX088596.1	0.619285010088179	BX088596.1::Inter	1.74626	0.00138663	0.204368	MG	1.10075	0.00202149	0.12239	MG
chr14:32670184-32670684	BX088596.1	0.573294577825472	BX088596.1::Inter	2.04016	2.76125e-07	0.38317	MG	1.21039	0.021573	0.229648	MG
chr14:3267400-3267900	pdgfrb	0.857841315129981	pdgfrb::Body	2.23059	0.00629022	0.0875334	MG	3.30363	1.04495e-05	0.141815	MG
chr14:3267904-3268404	pdgfrb	0.93510689129433	pdgfrb::TSS	3.51627	1.68644e-13	0.501975	MG	2.8243	1.3979e-15	0.456519	MG
chr14:32682991-32683491	BX088596.1	0.82549073789332	BX088596.1::Inter	3.15143	3.75088e-06	0.285196	MG	2.85174	1.33737e-07	0.264124	MG
chr14:32689895-32690395	BX088596.1	0.340997408558088	BX088596.1::Inter	2.6877	0.238778	0.0758958	MG	1.69696	0.0386526	0.0589099	MG
chr14:32714762-32715262	BX088596.1	0.516512036068441	BX088596.1::Inter	1.26589	8.94995e-08	0.538594	MG	1.25177	2.22065e-07	0.689701	MG
chr14:32754846-32755346	BX088596.1	0.84529534525597	BX088596.1::Inter	3.53594	7.88333e-08	0.268499	MG	3.12982	2.34733e-08	0.261152	MG
chr14:3277576-3278076	gstp1	0.408895449688603	gstp1::Inter	1.80423	0.000507345	0.272144	MG	1.80361	2.1e-05	0.293084	MG
chr14:32819954-32820454	BX088596.1	0.840336655947194	BX088596.1::Inter	1.88802	0.0101247	0.079357	MG	4.63791	8.65913e-06	0.121207	MG
chr14:33068845-33069345	dlg3	0.589091136773328	dlg3::Inter;si:dkey-31j3.11::Inter	3.59081	0.100783	0.0887311	MG	2.8356	0.0374934	0.0623403	MG
chr14:33068845-33069345	si:dkey-31j3.11	0.589091136773328	dlg3::Inter;si:dkey-31j3.11::Inter	3.59081	0.100783	0.0887311	MG	2.8356	0.0374934	0.0623403	MG
chr14:33217152-33217652	si:dkey-31j3.11	0.70254756957689	si:dkey-31j3.11::TSS	1.40161	0.188956	0.0498393	MG	2.1338	0.0170562	0.0610814	MG
chr14:33217877-33218377	si:dkey-31j3.11	0.866503960763609	si:dkey-31j3.11::TSS	0.704307	0.0225464	0.0648912	MG	1.02873	0.00726026	0.0955943	MG
chr14:33458461-33458961	atp1b4	0.850666020037779	atp1b4::Body	2.51254	0.000503706	0.119922	MG	2.85616	1.15769e-06	0.141428	MG
chr14:33460312-33460812	atp1b4	0.917710424068953	atp1b4::Body	2.29386	5.96623e-05	0.221636	MG	2.2062	1.70336e-09	0.230673	MG
chr14:33656420-33656920	atp1b4	0.40000448666651	atp1b4::Inter	0.549366	0.27545	0.013605	MG	1.62424	0.0847505	0.0597944	MG
chr14:34725242-34725742	rnf145a	0.620767731782072	rnf145a::Inter	3.42679	1.3078e-05	0.223537	MG	2.94702	3.63667e-06	0.174933	MG
chr14:34755653-34756153	rnf145a	0.579010335407545	rnf145a::Inter	2.60512	0.0451975	0.114959	MG	4.5586	1.66087e-05	0.120458	MG
chr14:34816305-34816805	rnf145a	0.456601988980295	rnf145a::Inter	3.36482	0.00257455	0.119425	MG	3.303	0.000157627	0.160172	MG
chr14:3505379-3505879	gstp1	0.671012290023094	gstp1::TSS	2.57851	0.0680849	0.0738842	MG	4.45344	0.000718737	0.122296	MG
chr14:3507038-3507538	gstp1	0.570173072429226	gstp1::TSS	0.915596	0.000772385	0.195759	MG	1.10801	0.0196314	0.165635	MG
chr14:3507810-3508310	gstp1	0.797886664663185	gstp1::TSS	1.83877	0.000442326	0.145015	MG	3.89467	2.16492e-07	0.229184	MG
chr14:3509589-3510089	gstp1	0.808709314181304	gstp1::Body	2.45375	0.000145387	0.170599	MG	2.72879	4.08714e-09	0.270428	MG
chr14:35123655-35124155	rnf145a	0.349638408699651	rnf145a::Inter	2.42721	0.0366118	0.10611	MG	1.93076	0.0164754	0.0747717	MG
chr14:4065457-4065957	enpp6	0.750261525187979	enpp6::Body	2.7869	0.141533	0.0620195	MG	2.04503	0.00187909	0.12857	MG
chr14:4073487-4073987	enpp6	0.789527743411346	enpp6::Body	3.26865	0.0203404	0.0840836	MG	4.14702	0.00920639	0.0825907	MG
chr14:4076153-4076653	enpp6	0.85033604191384	enpp6::TSS	2.98768	3.46907e-05	0.144985	MG	1.86674	0.0185819	0.142856	MG
chr14:4079388-4079888	enpp6	0.601951562876153	enpp6::Inter	1.58211	0.106018	0.0787956	MG	1.72061	0.0208629	0.0945271	MG
chr14:40818734-40819234	elf1	0.696473917328849	elf1::Body	1.61105	0.222056	0.0941697	MG	1.11235	0.121627	0.053565	MG
chr14:40849515-40850015	elf1	0.65723181411462	elf1::TSS	1.66431	0.0767726	0.0884123	MG	2.19317	0.000558903	0.176808	MG
chr14:40850119-40850619	elf1	0.680919367482694	elf1::TSS	1.01952	0.207354	0.144826	MG	0.730631	0.0854222	0.1237	MG
chr14:4123335-4123835	dhrs13l1	0.379016779560911	dhrs13l1::Inter	1.54889	0.0707912	0.0263557	MG	2.04457	0.0993327	0.0779735	MG
chr14:4151078-4151578	dhrs13l1	0.830993797988403	dhrs13l1::TSS	3.93144	1.17326e-07	0.347677	MG	3.86164	5.88074e-08	0.175556	MG
chr14:43060161-43060661	LO018400.1	0.65465688021177	LO018400.1::Inter	2.5825	0.0181843	0.0624039	MG	1.88111	0.0523684	0.0752617	MG
chr14:43136697-43137197	LO018400.1	0.752769831777015	LO018400.1::Inter	1.92068	8.91435e-05	0.11993	MG	2.08679	0.000101595	0.121926	MG
chr14:43137232-43137732	LO018400.1	0.72303656853717	LO018400.1::Inter	3.43234	1.10964e-06	0.15383	MG	3.5553	1.44662e-07	0.188016	MG
chr14:4333289-4333789	dhrs13l1	0.588436525018214	dhrs13l1::Inter	2.16784	0.00972999	0.0876968	MG	2.71623	0.00145943	0.102367	MG
chr14:43382211-43382711	LO018400.1	0.714904094363312	LO018400.1::Inter	3.6707	0.222056	0.0236587	MG	2.24945	0.12119	0.0429898	MG
chr14:43422566-43423066	LO018400.1	0.754399614981748	LO018400.1::Inter	4.18742	4.2711e-05	0.202454	MG	3.43975	1.34174e-08	0.20912	MG
chr14:43460518-43461018	LO018400.1	0.766224978414725	LO018400.1::Inter	2.53247	0.141533	0.0637905	MG	3.73665	0.00309862	0.0955826	MG
chr14:45402409-45402909	CR383676.2	0.514201747946623	CR383676.2::Inter;CR383676.3::Inter	3.18199	0.00167699	0.127447	MG	3.52778	5.73144e-05	0.144606	MG
chr14:45402409-45402909	CR383676.3	0.514201747946623	CR383676.2::Inter;CR383676.3::Inter	3.18199	0.00167699	0.127447	MG	3.52778	5.73144e-05	0.144606	MG
chr14:45735210-45735710	CR383676.2	0.614027426245434	CR383676.2::Inter;CR383676.3::Inter	3.95333	0.00356753	0.149611	MG	2.07038	1.16779e-05	0.136978	MG
chr14:45735210-45735710	CR383676.3	0.614027426245434	CR383676.2::Inter;CR383676.3::Inter	3.95333	0.00356753	0.149611	MG	2.07038	1.16779e-05	0.136978	MG
chr14:46060180-46060680	ENSDARG00000071353	0.326713740998674	ENSDARG00000071353::Inter	2.38601	0.181855	0.054221	MG	1.40091	0.0198124	0.0934641	MG
chr14:46596876-46597376	prom1a	0.548803591438477	prom1a::Body	1.73384	0.0525336	0.120455	MG	2.52814	0.000373414	0.160449	MG
chr14:47847302-47847802	rapgef2	ND	rapgef2::TSS	0.809185	0.0836701	0.0592788	MG	1.08007	0.178305	0.0950495	MG
chr14:47940218-47940718	rapgef2	ND	rapgef2::TSS	0.926912	0.147436	0.0691036	MG	1.02393	0.231603	0.0729652	MG
chr14:47964576-47965076	rapgef2	0.34995344079414	rapgef2::Body	1.73943	0.00655423	0.188786	MG	2.536	7.01256e-07	0.290731	MG
chr14:47974440-47974940	rapgef2	0.443188030711626	rapgef2::Body	2.29611	5.81864e-07	0.197819	MG	2.2855	5.20275e-08	0.3052	MG
chr14:48187479-48187979	rxfp1	0.598652655156162	rxfp1::TSS	6.30543	3.26415e-05	0.15744	MG	1.77138	0.0859668	0.0428358	MG
chr14:49604548-49605048	LO018188.1	0.933375659201019	LO018188.1::Body	3.28977	1.40765e-06	0.260428	MG	2.19312	0.000864423	0.223008	MG
chr14:50902729-50903229	CU302253.1	0.929800785390691	CU302253.1::Inter	3.21954	1.07746e-13	0.472011	MG	3.33888	3.61332e-16	0.472078	MG
chr14:51044053-51044553	CU302253.1	0.632546758613418	CU302253.1::Inter	0.756266	0.139727	0.080814	MG	1.44326	0.00875482	0.122213	MG
chr14:5411492-5411992	fgf24	0.892585118653395	fgf24::Inter	2.38427	1.72998e-06	0.32689	MG	3.80642	3.17047e-14	0.461116	MG
chr14:5413275-5413775	fgf24	0.696516747045718	fgf24::Inter	1.77619	0.147436	0.0238223	MG	0.971963	0.0564949	0.0314703	MG
chr14:5419918-5420418	fgf24	0.724952386675233	fgf24::Inter	2.29645	0.00426488	0.0838651	MG	2.2776	0.0737779	0.070962	MG
chr14:5543084-5543584	fgf24	0.823390797933088	fgf24::Body	2.76837	0.00134903	0.191692	MG	2.53198	0.000329709	0.148053	MG
chr14:5545240-5545740	fgf24	0.792356298660479	fgf24::TSS	1.91771	0.188956	0.0518295	MG	1.95306	0.0438438	0.0617798	MG
chr14:5546257-5546757	fgf24	0.921112281376852	fgf24::TSS	2.52873	9.21895e-05	0.223154	MG	1.75674	1.75988e-05	0.173893	MG
chr14:5571046-5571546	fgf24	0.790905361242802	fgf24::Inter	1.59586	0.00377576	0.0708402	MG	2.00396	0.0777139	0.0632301	MG
chr14:6980032-6980532	eif4ebp3l	0.745561721511468	eif4ebp3l::TSS	3.09323	4.13562e-06	0.275358	MG	1.00406	0.0753254	0.0890805	MG
chr14:6984420-6984920	eif4ebp3l	0.717538095031427	eif4ebp3l::Body	1.32737	0.00112497	0.239487	MG	2.05729	5.89443e-05	0.253049	MG
chr14:6987358-6987858	eif4ebp3l	0.807934257596257	eif4ebp3l::TSS	1.22004	0.0969738	0.186295	MG	1.12582	0.0811276	0.164074	MG
chr14:7091983-7092483	eif4ebp3l	0.737962639463354	eif4ebp3l::Inter	2.73678	0.069477	0.0475103	MG	2.21482	0.0441152	0.0860458	MG
chr14:7119879-7120379	ctsf	0.569175697541054	ctsf::Inter;eif4ebp3l::Inter	2.02657	0.100783	0.0980494	MG	1.65262	0.16242	0.0437074	MG
chr14:7119879-7120379	eif4ebp3l	0.569175697541054	ctsf::Inter;eif4ebp3l::Inter	2.02657	0.100783	0.0980494	MG	1.65262	0.16242	0.0437074	MG
chr14:7256646-7257146	ctsf	0.518998833935198	ctsf::Inter	2.97179	0.02771	0.0719163	MG	3.61025	0.00480752	0.104999	MG
chr14:7262151-7262651	ctsf	0.308644100546406	ctsf::Inter	1.47373	0.204434	0.0769231	MG	2.17662	0.00060901	0.14005	MG
chr14:7268493-7268993	ctsf	0.374816328866337	ctsf::Inter	2.45683	0.044113	0.0991763	MG	2.3768	0.00238606	0.157489	MG
chr14:9521361-9521861	atoh8	0.798009720725696	atoh8::TSS	1.6298	9.40805e-06	0.373242	MG	1.58939	1.47678e-06	0.310021	MG
chr14:9522110-9522610	atoh8	0.8085988921337	atoh8::TSS	1.89084	0.0130647	0.127826	MG	1.89734	0.000647316	0.0775236	MG
chr15:10111768-10112268	tenm4	0.654080254719257	tenm4::Body	4.09538	0.155921	0.0324466	MG	2.50851	0.0585708	0.0555798	MG
chr15:10131560-10132060	tenm4	0.73581882934613	tenm4::Body	3.93584	7.4382e-05	0.215407	MG	4.12403	2.5537e-09	0.22942	MG
chr15:10135195-10135695	tenm4	0.746730225676558	tenm4::Body	2.08336	3.91113e-06	0.156282	MG	3.99294	5.60091e-10	0.287083	MG
chr15:10151441-10151941	tenm4	0.631325736384527	tenm4::Body	1.79379	0.239284	0.0411326	MG	1.13439	0.231229	0.0461288	MG
chr15:10189555-10190055	tenm4	0.642905099093308	tenm4::Body	2.45735	5.54074e-05	0.193225	MG	1.14225	0.0764097	0.128438	MG
chr15:10433210-10433710	tenm4	0.741694841261402	tenm4::Body	2.92331	9.35419e-09	0.325006	MG	4.11558	8.28244e-11	0.276189	MG
chr15:10437279-10437779	tenm4	0.772115091046478	tenm4::Body	3.39435	8.45148e-07	0.292733	MG	2.53545	1.66612e-05	0.154399	MG
chr15:10454593-10455093	tenm4	0.810205340842565	tenm4::TSS	1.97586	0.0699981	0.0283714	MG	2.10826	0.00776885	0.0864467	MG
chr15:10455216-10455716	tenm4	0.881590134163435	tenm4::TSS	1.18473	0.00736591	0.124743	MG	1.54248	0.000276211	0.175165	MG
chr15:11700688-11701188	prkd2	0.748525808136788	prkd2::Inter	3.54893	7.10924e-10	0.313581	MG	2.21214	8.44012e-08	0.221876	MG
chr15:11701221-11701721	prkd2	0.682803752609697	prkd2::Inter	2.75491	0.0135266	0.0604843	MG	2.30871	0.0115472	0.0547541	MG
chr15:11810877-11811377	prkd2	0.500810926939432	prkd2::Inter	1.30694	0.106018	0.0435792	MG	1.26153	0.134332	0.0603657	MG
chr15:1397441-1397941	schip1	0.593006575752001	schip1::TSS	1.6738	1.28308e-10	0.87923	MG	0.449628	0.0164754	0.268769	MG
chr15:1397947-1398447	schip1	0.527092684930222	schip1::Body	1.3724	0.301352	0.0719919	MG	0.943793	0.191378	0.0353814	MG
chr15:14861649-14862149	CR936977.2	0.826836051745651	CR936977.2::TSS	2.62833	0.00232004	0.166556	MG	1.50057	0.0114795	0.0978388	MG
chr15:14887055-14887555	CR936977.2	0.94636262751281	CR936977.2::Body	3.07744	2.838e-07	0.301647	MG	2.53123	7.73805e-14	0.344469	MG
chr15:14986966-14987466	CR936977.2	0.870425947326366	CR936977.2::Inter	3.72318	0.00094592	0.127278	MG	4.61494	2.29431e-05	0.152759	MG
chr15:15263045-15263545	proca1	0.495315807216969	proca1::Inter	1.26547	0.265671	0.079028	MG	2.46161	0.00103476	0.174545	MG
chr15:15450701-15451201	proca1	0.772789390702176	proca1::TSS	1.62202	4.12314e-08	0.411655	MG	0.483774	0.191378	0.147278	MG
chr15:1574858-1575358	schip1	0.44711486893249	schip1::Inter	3.33549	0.0309626	0.0844121	MG	4.26941	7.04011e-08	0.16537	MG
chr15:16321455-16321955	nxn	0.7034705456184	nxn::Body	1.6197	0.141531	0.058353	MG	3.35281	0.0106419	0.0606438	MG
chr15:16323405-16323905	nxn	0.599225356155965	nxn::TSS	0.487482	0.283774	0.114308	MG	0.564247	0.286681	0.0882986	MG
chr15:16651546-16652046	caln1	0.407456106552279	caln1::Body	2.23556	0.04257	0.0499183	MG	4.40982	0.00147737	0.0753079	MG
chr15:16720722-16721222	caln1	0.451250114703785	caln1::Inter	0.692466	0.222056	0.0670284	MG	0.760816	0.0166127	0.103416	MG
chr15:16729092-16729592	caln1	0.590566077862951	caln1::Inter	2.92596	0.00576384	0.0826956	MG	2.69799	0.0163375	0.0813259	MG
chr15:16729655-16730155	caln1	0.465727376011109	caln1::Inter	4.79286	2.90577e-05	0.170721	MG	3.73275	0.00153034	0.0730009	MG
chr15:18020572-18021072	phldb1b	0.391294288515175	phldb1b::Body	1.17887	0.124486	0.097034	MG	0.347194	0.149374	0.0356071	MG
chr15:18022891-18023391	phldb1b	0.387723264991817	phldb1b::TSS	0.46007	0.263198	0.0381035	MG	1.36642	0.0719096	0.159785	MG
chr15:18087682-18088182	phldb1b	0.471802321743275	phldb1b::Body	5.04472	4.3207e-06	0.186682	MG	5.16758	1.76488e-15	0.366779	MG
chr15:18090972-18091472	phldb1b	0.470848247651695	phldb1b::TSS	0.450886	0.270299	0.0128394	MG	1.73768	0.191378	0.0865162	MG
chr15:18655018-18655518	cadm1b	0.944592010914657	cadm1b::Inter	3.11424	2.22627e-15	0.546297	MG	1.74118	2.31216e-10	0.370313	MG
chr15:18672600-18673100	cadm1b	0.748046428106714	cadm1b::Inter	3.95976	0.0180921	0.118948	MG	2.66413	0.0115441	0.0686197	MG
chr15:18700087-18700587	cadm1b	0.866187616811553	cadm1b::Inter	4.33944	4.28062e-06	0.242586	MG	2.26971	4.89086e-05	0.186581	MG
chr15:18701710-18702210	cadm1b	0.824364499946257	cadm1b::Inter	5.11697	0.00837584	0.0679486	MG	3.39445	0.0569653	0.0560118	MG
chr15:18714435-18714935	cadm1b	0.793573275066184	cadm1b::Inter	3.24045	0.0420608	0.0437591	MG	4.93692	0.0023298	0.0944615	MG
chr15:18725442-18725942	cadm1b	0.79383507897576	cadm1b::Inter	5.2445	0.000478404	0.169814	MG	2.6703	0.000939108	0.113914	MG
chr15:18743860-18744360	cadm1b	0.891228286907609	cadm1b::Inter	2.87891	4.05608e-07	0.219746	MG	3.69785	9.81112e-07	0.19676	MG
chr15:18863985-18864485	cadm1b	ND	cadm1b::TSS	5.09843	0.0707912	0.0670555	MG	2.87249	0.172873	0.0513029	MG
chr15:19140339-19140839	igsf9ba	0.62983709607026	igsf9ba::Body	2.65568	0.141818	0.0567089	MG	3.23765	0.00748209	0.0837708	MG
chr15:19278737-19279237	igsf9ba	0.669316503249798	igsf9ba::Inter	3.22986	0.00195794	0.108497	MG	3.50889	0.0164754	0.0848787	MG
chr15:19280539-19281039	igsf9ba	0.567641690950886	igsf9ba::Inter	1.85639	0.267923	0.0365508	MG	1.80687	0.0855714	0.0288028	MG
chr15:20024032-20024532	auts2b	0.813885723579558	auts2b::TSS	1.56036	0.000132762	0.271223	MG	1.6817	3.18858e-06	0.27071	MG
chr15:20024630-20025130	auts2b	0.488094130755858	auts2b::TSS	1.51893	0.296052	0.0386373	MG	1.06007	0.258261	0.0212187	MG
chr15:20042646-20043146	auts2b	0.451830895472	auts2b::Inter	1.60154	0.000245834	0.363769	MG	3.2008	6.14546e-20	0.746606	MG
chr15:21441922-21442422	sorl1	0.480356221327607	sorl1::Inter	1.06769	0.108963	0.0701817	MG	1.4863	0.0040822	0.124767	MG
chr15:21446090-21446590	sorl1	0.629727912831273	sorl1::Inter	1.36687	7.68497e-05	0.204733	MG	1.37092	4.49805e-07	0.226648	MG
chr15:21449193-21449693	sorl1	0.487924425606537	sorl1::Inter	1.33731	0.0409413	0.148654	MG	1.31209	0.124533	0.128122	MG
chr15:21488000-21488500	sorl1	0.47681689348766	sorl1::Inter	2.27601	0.0639287	0.102574	MG	1.33626	0.0386526	0.0751913	MG
chr15:21494321-21494821	sorl1	0.630805091709057	sorl1::Inter	5.10784	0.000188364	0.158432	MG	3.64166	2.12423e-07	0.171568	MG
chr15:21500906-21501406	sorl1	0.637588728512374	sorl1::Inter	3.78669	5.03081e-14	0.490969	MG	4.06241	7.28358e-23	0.656646	MG
chr15:21716744-21717244	BX572077.1	0.767167652792967	BX572077.1::Inter	1.75224	0.0468414	0.138366	MG	2.46715	9.35453e-05	0.216035	MG
chr15:21751250-21751750	BX572077.1	0.524510984369453	BX572077.1::Inter	1.18446	0.0494106	0.0401487	MG	1.66111	0.233578	0.0250397	MG
chr15:21786373-21786873	sik2b	0.82228109135629	sik2b::Body	4.03624	8.52488e-11	0.305619	MG	4.02011	9.12542e-13	0.279435	MG
chr15:21786887-21787387	sik2b	0.868636411165782	sik2b::Body	4.07065	9.94116e-18	0.518527	MG	3.85077	3.41947e-21	0.587091	MG
chr15:21790142-21790642	sik2b	0.512151309743562	sik2b::Body	0.761927	0.250173	0.0649868	MG	2.12975	0.00628734	0.188315	MG
chr15:21793503-21794003	sik2b	0.851667256073021	sik2b::Body	3.86218	1.19786e-06	0.240617	MG	2.7764	4.80144e-07	0.224271	MG
chr15:21835286-21835786	sik2b	0.562990241960779	sik2b::Body	1.56402	0.0984483	0.0783598	MG	1.97576	0.0343112	0.0737107	MG
chr15:22311451-22311951	hepacama	0.865297161623074	hepacama::TSS	3.43633	0.00046802	0.134259	MG	2.75067	2.76759e-05	0.190872	MG
chr15:22313967-22314467	hepacama	0.897114876964981	hepacama::Body	3.54873	5.46815e-12	0.414241	MG	2.36406	3.10502e-10	0.365527	MG
chr15:22322528-22323028	hepacama	0.718996043204587	hepacama::Body	4.08206	0.0177601	0.0873699	MG	3.65234	0.000886484	0.144999	MG
chr15:22326251-22326751	hepacama	0.745432106296107	hepacama::Inter	1.99385	0.203299	0.0381529	MG	2.14175	0.187707	0.0431051	MG
chr15:22597818-22598318	grik4	0.662155570638066	grik4::Inter	3.41866	0.13956	0.0534944	MG	1.50871	0.266429	0.0362671	MG
chr15:22610662-22611162	grik4	0.817843586698166	grik4::Inter	1.81201	0.0207625	0.102283	MG	2.67246	1.36809e-06	0.217094	MG
chr15:22619874-22620374	grik4	0.468645956852952	grik4::Inter	3.19949	0.13956	0.0447166	MG	3.93292	0.0587516	0.0287764	MG
chr15:22722813-22723313	grik4	0.550931668895657	grik4::Body	2.15167	0.10302	0.0550049	MG	3.02135	0.0146731	0.0718696	MG
chr15:23771630-23772130	myo18ab	0.570248284327689	myo18ab::Inter	3.47307	0.0139207	0.117927	MG	2.12251	0.00409882	0.128755	MG
chr15:23952959-23953459	myo18ab	0.467820630134524	myo18ab::Body	2.19681	0.145712	0.0498288	MG	3.39189	0.0522854	0.0402802	MG
chr15:24058047-24058547	myo18ab	0.348748489238379	myo18ab::Body	1.26599	0.222056	0.0409025	MG	1.3604	0.159647	0.0516353	MG
chr15:24463261-24463761	smtnl	0.470147097143628	smtnl::Inter	5.71546	0.00338844	0.10392	MG	2.30964	0.0844099	0.0924901	MG
chr15:24633058-24633558	smtnl	0.81092485631811	smtnl::Inter	1.06923	0.101815	0.112522	MG	2.41375	1.01002e-05	0.251852	MG
chr15:24641596-24642096	smtnl	0.877376834458413	smtnl::TSS	2.28067	2.36937e-05	0.212261	MG	7.32823	1.99117e-12	0.321977	MG
chr15:24643694-24644194	smtnl	0.850238352773636	smtnl::TSS	2.796	4.02538e-10	0.44897	MG	1.71188	2.17359e-05	0.232522	MG
chr15:24647165-24647665	smtnl	0.785162444034738	smtnl::Body	5.08167	0.000754001	0.123178	MG	4.05338	0.000185727	0.100936	MG
chr15:24654486-24654986	smtnl	0.607662706831516	smtnl::Body	3.68516	0.0115181	0.0626369	MG	2.33936	0.0842838	0.0409088	MG
chr15:24657373-24657873	smtnl	0.625684456067457	smtnl::Body	2.09362	0.0916193	0.0885941	MG	2.51701	0.0173808	0.0504935	MG
chr15:24659324-24659824	smtnl	0.519291442248921	smtnl::Body	1.15458	0.0273058	0.167963	MG	0.908665	0.0371282	0.0943903	MG
chr15:26518526-26519026	pitpnm3	0.546560660985016	pitpnm3::Inter	1.275	0.234664	0.0663453	MG	1.82061	0.0171814	0.126478	MG
chr15:26521104-26521604	pitpnm3	0.718923159157523	pitpnm3::Inter	5.53372	0.00118848	0.12738	MG	3.05674	0.000585964	0.101266	MG
chr15:26825495-26825995	pitpnm3	0.77349054783882	pitpnm3::Body	3.87243	0.00550542	0.104336	MG	2.2097	0.0121421	0.0738779	MG
chr15:26843932-26844432	pitpnm3	0.788922020142165	pitpnm3::Body	2.41807	3.14384e-05	0.26852	MG	1.90678	0.00141868	0.167024	MG
chr15:28910828-28911328	gipr	0.763565702498888	gipr::Inter	4.23435	0.0309017	0.0359316	MG	3.00651	0.00211248	0.0908272	MG
chr15:28940294-28940794	gipr	0.79618095396125	gipr::TSS	1.72308	0.00126986	0.0803968	MG	0.288671	0.100878	0.0150412	MG
chr15:29055755-29056255	gipr	0.724657722507337	gipr::Inter	2.09156	0.0029748	0.119693	MG	2.71303	4.51928e-05	0.193532	MG
chr15:29062086-29062586	gipr	0.726667484033695	gipr::Inter	2.2908	2.2241e-06	0.245749	MG	2.29684	4.85994e-07	0.195074	MG
chr15:29062728-29063228	gipr	0.441852044524007	gipr::Inter	0.632618	0.0901405	0.11685	MG	0.781917	0.0110219	0.126693	MG
chr15:29071803-29072303	gipr	0.858950378157011	gipr::Inter	3.25597	1.93702e-07	0.271943	MG	3.39952	1.24128e-09	0.269884	MG
chr15:29756253-29756753	zgc:153372	0.540523858884582	zgc:153372::Body	1.06184	0.026736	0.16273	MG	0.715663	0.120377	0.127089	MG
chr15:29893433-29893933	zgc:153372	0.706920607142643	zgc:153372::Inter	4.06416	0.000920632	0.134915	MG	3.33743	0.00490217	0.0987332	MG
chr15:29899445-29899945	zgc:153372	0.559377139505282	zgc:153372::Inter	1.67577	0.301352	0.0414949	MG	3.67458	0.00289032	0.0943874	MG
chr15:30271582-30272082	msi2b	0.390457655466997	msi2b::Inter	2.93457	0.202095	0.0723853	MG	2.54558	0.0576299	0.0384832	MG
chr15:30293908-30294408	msi2b	0.31593589442438	msi2b::Inter	1.06461	0.0563797	0.155307	MG	2.00693	3.23409e-05	0.182456	MG
chr15:30431730-30432230	msi2b	0.321884451311494	msi2b::Body	0.799064	0.270299	0.0131016	MG	3.09812	0.0787462	0.0349041	MG
chr15:30432271-30432771	msi2b	0.437963185375381	msi2b::Body	3.13868	0.00365279	0.0827062	MG	4.48725	0.00369398	0.072793	MG
chr15:30472518-30473018	msi2b	0.518115396341425	msi2b::Body	3.42589	0.0464172	0.0677342	MG	3.66051	0.00287355	0.101188	MG
chr15:30530809-30531309	msi2b	0.540893389436016	msi2b::Body	2.04266	0.0691769	0.0900606	MG	1.94014	0.0587516	0.0602378	MG
chr15:31109272-31109772	ksr1b	0.709665148806884	ksr1b::TSS	2.2312	0.0111839	0.160722	MG	1.90335	0.000712275	0.146884	MG
chr15:31112051-31112551	ksr1b	0.820041626420118	ksr1b::Body	4.28682	6.4635e-06	0.199941	MG	2.14562	0.00499088	0.128798	MG
chr15:31112664-31113164	ksr1b	0.751501911768859	ksr1b::Body	2.50834	0.198245	0.043846	MG	2.26293	0.0575102	0.0694884	MG
chr15:31147010-31147510	ksr1b	0.838151442579333	ksr1b::TSS	1.64084	0.0376363	0.0570246	MG	1.67313	0.000216687	0.159076	MG
chr15:31683301-31683801	b3glcta	0.55812567351757	b3glcta::Body	2.92135	0.0278297	0.0598045	MG	4.06994	0.00581207	0.0500584	MG
chr15:31713788-31714288	b3glcta	0.512201980228451	b3glcta::Body	2.93396	7.80357e-05	0.199816	MG	2.13657	5.82688e-08	0.259933	MG
chr15:31729892-31730392	b3glcta	0.73572364250853	b3glcta::Body	3.82334	3.6474e-12	0.330269	MG	3.55645	8.55626e-12	0.26833	MG
chr15:31735675-31736175	rxfp2b	0.763146152544061	rxfp2b::TSS	4.5946	0.0202367	0.0466954	MG	2.06525	0.016749	0.0584728	MG
chr15:31796811-31797311	dchs1a	0.451853353498675	dchs1a::Inter	2.64184	0.198245	0.0552428	MG	1.81428	0.246157	0.0377175	MG
chr15:3284144-3284644	foxo1a	0.740854908761293	foxo1a::TSS	1.29016	0.000429639	0.293679	MG	0.927231	0.00252449	0.188244	MG
chr15:34102358-34102858	dgkb	0.434971753891051	dgkb::Inter	1.65687	0.0211335	0.146646	MG	2.16036	0.0176596	0.173272	MG
chr15:34201414-34201914	agmo	0.639433895013274	agmo::Inter;dgkb::Inter	3.94622	0.222056	0.0290615	MG	2.30427	0.171927	0.0408886	MG
chr15:34201414-34201914	dgkb	0.639433895013274	agmo::Inter;dgkb::Inter	3.94622	0.222056	0.0290615	MG	2.30427	0.171927	0.0408886	MG
chr15:34326050-34326550	dgkb	0.753190475199505	dgkb::TSS	3.1451	0.13956	0.0471458	MG	3.13645	0.0108139	0.0753688	MG
chr15:3438449-3438949	foxo1a	0.561820078408111	foxo1a::Inter	2.48907	0.000170179	0.237211	MG	3.21758	3.80474e-08	0.281248	MG
chr15:34418278-34418778	agmo	0.760227243339003	agmo::TSS	1.94096	0.00254341	0.137333	MG	2.09444	0.0173444	0.115995	MG
chr15:35040407-35040907	sesn3	0.582476558249694	sesn3::Inter	3.59891	0.198245	0.0472249	MG	1.0838	0.181063	0.0326676	MG
chr15:35042715-35043215	sesn3	0.735851508899414	sesn3::TSS	1.28122	0.0520698	0.115646	MG	2.05742	8.24531e-05	0.268983	MG
chr15:35054601-35055101	sesn3	0.817248989405021	sesn3::Body	2.81302	2.19677e-07	0.348884	MG	2.26951	3.14866e-08	0.416042	MG
chr15:3712443-3712943	CABZ01061591.1	0.671909705500298	CABZ01061591.1::Inter	4.1472	0.0707912	0.0337071	MG	4.79993	9.30248e-05	0.134653	MG
chr15:3806412-3806912	CABZ01061591.1	0.484283413394026	CABZ01061591.1::Inter	1.17709	0.0678505	0.0395492	MG	1.89027	0.0535342	0.0574198	MG
chr15:3825106-3825606	CABZ01061591.1	0.751850927528426	CABZ01061591.1::TSS	0.969504	0.0278297	0.126983	MG	1.61984	0.000988179	0.222578	MG
chr15:39894008-39894508	ngef	0.563226754538304	ngef::Inter	3.2868	0.101373	0.0726461	MG	1.95145	0.0528416	0.0855688	MG
chr15:3995519-3996019	CABZ01061591.1	0.820184571704509	CABZ01061591.1::Inter	2.40951	0.0216575	0.0774623	MG	2.22481	0.0164754	0.0907055	MG
chr15:40072661-40073161	ngef	0.896726835056491	ngef::TSS	1.84271	0.000190283	0.150848	MG	2.10353	0.00240543	0.116317	MG
chr15:40073522-40074022	ngef	ND	ngef::TSS	3.92109	0.0707912	0.028525	MG	3.76958	0.0587516	0.0254803	MG
chr15:40074858-40075358	ngef	0.790401463224791	ngef::TSS	2.90679	0.00608313	0.0994013	MG	2.29763	0.0430998	0.074443	MG
chr15:40077893-40078393	ngef	0.775232131925469	ngef::Body	4.28693	0.155921	0.0373401	MG	3.11292	0.0108433	0.0558292	MG
chr15:40090243-40090743	ngef	0.700376158150179	ngef::Body	1.16624	0.103443	0.0213904	MG	1.8752	0.0524473	0.0346278	MG
chr15:40090780-40091280	ngef	0.877022095164138	ngef::Body	0.768705	0.0013964	0.0815238	MG	2.44928	8.82412e-07	0.226502	MG
chr15:40187818-40188318	efhd1	0.659637026631245	efhd1::TSS	2.04965	8.30068e-08	0.520747	MG	1.79169	2.44056e-06	0.46051	MG
chr15:40189625-40190125	efhd1	0.90733437136543	efhd1::Body	2.77604	5.93137e-06	0.228516	MG	2.9	7.12436e-08	0.193028	MG
chr15:40190215-40190715	efhd1	0.764238276066165	efhd1::Body	3.42708	0.0309017	0.0823648	MG	1.9528	0.116937	0.0349763	MG
chr15:40208647-40209147	efhd1	0.541688720935129	efhd1::Body	2.48745	0.0505133	0.133655	MG	1.68605	0.155887	0.101517	MG
chr15:40426932-40427432	efhd1	0.559382771652833	efhd1::Inter	2.77685	0.0694523	0.120966	MG	0.951708	0.0636109	0.0758794	MG
chr15:41869967-41870467	epha4l	0.53050134424756	epha4l::Inter	1.87938	0.128407	0.057875	MG	2.96765	0.00217282	0.106862	MG
chr15:42010531-42011031	epha4l	0.507903488071991	epha4l::Body	4.745	0.000309868	0.17292	MG	1.74812	0.0951463	0.0738688	MG
chr15:42018953-42019453	epha4l	0.578813695711432	epha4l::Body	1.7551	0.0712419	0.0478879	MG	2.13344	0.0526789	0.0567214	MG
chr15:42023809-42024309	epha4l	0.628924541061147	epha4l::Body	3.60107	2.46866e-07	0.195635	MG	3.01514	3.72223e-09	0.207165	MG
chr15:42396926-42397426	tiam1b	0.739275824920304	tiam1b::TSS	1.25468	0.0119301	0.165193	MG	1.08831	0.0263063	0.137093	MG
chr15:42409445-42409945	tiam1b	0.901468748891037	tiam1b::Body	2.90039	7.79425e-09	0.401708	MG	2.95481	2.39556e-10	0.344671	MG
chr15:42452536-42453036	tiam1b	0.902116249607517	tiam1b::Body	2.96692	8.79837e-13	0.496833	MG	3.05722	2.15985e-16	0.532144	MG
chr15:4283594-4284094	ece2b	0.675557636729986	ece2b::Body	2.57377	4.59249e-05	0.253218	MG	3.29541	4.74209e-12	0.396967	MG
chr15:4400031-4400531	atp1b3b	0.498718178387183	atp1b3b::Body	2.57685	0.0454983	0.146662	MG	1.6232	0.132369	0.0702238	MG
chr15:7064592-7065092	pik3cb	0.831142686132901	pik3cb::TSS	1.64633	0.00492634	0.104959	MG	2.4428	2.54185e-05	0.199857	MG
chr15:7065157-7065657	pik3cb	0.657631258708089	pik3cb::TSS	3.39551	0.140922	0.0672962	MG	1.69422	0.229568	0.0571006	MG
chr15:7289666-7290166	pik3cb	0.34087989568432	pik3cb::Inter	1.23315	0.0652257	0.120252	MG	1.74401	0.00075148	0.0923906	MG
chr16:1242272-1242772	LO018340.1	0.904143251747547	LO018340.1::Inter	4.65074	6.72436e-07	0.177791	MG	2.6563	2.10883e-06	0.286863	MG
chr16:12472902-12473402	mfap5	0.466984033577569	mfap5::Inter	1.31188	0.106018	0.0903105	MG	1.6418	0.0501114	0.0857124	MG
chr16:12501829-12502329	mfap5	0.850791974569353	mfap5::Inter	2.13154	6.50591e-06	0.191609	MG	2.53626	2.58912e-05	0.220547	MG
chr16:1254893-1255393	LO018340.1	0.83472224652572	LO018340.1::TSS	2.17745	1.19862e-05	0.269525	MG	2.41129	3.47049e-05	0.296219	MG
chr16:1255545-1256045	LO018340.1	ND	LO018340.1::TSS	2.71182	0.021084	0.0710203	MG	1.84127	0.0830242	0.038061	MG
chr16:1265097-1265597	LO018340.1	0.825207295507672	LO018340.1::Body	4.64547	8.18509e-07	0.227079	MG	2.12078	0.000256677	0.138433	MG
chr16:12686766-12687266	mfap5	ND	mfap5::TSS	4.45474	0.106018	0.0421946	MG	2.65466	0.266429	0.0106794	MG
chr16:12688742-12689242	mfap5	0.763009089498641	mfap5::TSS	2.44119	0.00445505	0.0840077	MG	3.25975	0.00493402	0.073115	MG
chr16:13804297-13804797	ttyh1	0.858917525140097	ttyh1::Inter	0.499822	0.301352	0.0707964	MG	0.62615	0.170547	0.082106	MG
chr16:13854804-13855304	zgc:174888	0.721184679882618	zgc:174888::TSS	1.79	0.000575996	0.299098	MG	1.90823	3.90381e-05	0.222861	MG
chr16:13857807-13858307	zgc:174888	0.545725453907323	zgc:174888::Body	2.42526	0.0640157	0.0446773	MG	0.846202	0.0386526	0.0236995	MG
chr16:1396447-1396947	LO018340.1	0.737379110217882	LO018340.1::Inter	5.22249	0.00534072	0.0732579	MG	2.44126	0.0578481	0.0530941	MG
chr16:14588569-14589069	deptor	0.571038321709536	deptor::TSS	1.82088	0.0515665	0.0974682	MG	2.11724	0.00687478	0.114288	MG
chr16:14684598-14685098	col14a1a	0.54306130562135	col14a1a::TSS	2.83886	0.014661	0.134365	MG	1.41548	0.0891575	0.0425274	MG
chr16:14725579-14726079	col14a1a	0.70443550573632	col14a1a::Body	5.22718	0.00534072	0.0735029	MG	5.17471	0.0164754	0.0708055	MG
chr16:14829693-14830193	col14a1a	0.800886612824459	col14a1a::Body	4.22843	2.99148e-05	0.150356	MG	2.70602	0.00502489	0.0862416	MG
chr16:15147405-15147905	sntb1	0.896480148610727	sntb1::Inter	4.02197	1.95183e-09	0.340405	MG	4.2875	2.92907e-13	0.344119	MG
chr16:15153568-15154068	sntb1	0.737291111459505	sntb1::Inter	2.22584	0.16606	0.0830116	MG	2.19079	0.0115006	0.0631544	MG
chr16:15158545-15159045	sntb1	0.88190046631018	sntb1::Inter	2.7203	3.96522e-08	0.331321	MG	2.93907	2.05323e-08	0.307374	MG
chr16:15262644-15263144	sntb1	0.748329370467477	sntb1::TSS	2.29893	0.00162344	0.214025	MG	1.61157	0.0121168	0.112139	MG
chr16:16546570-16547070	c4b	0.683611501939242	c4b::Inter;nbeal2::Inter	4.57067	0.0309017	0.0458939	MG	3.08215	0.0791166	0.0793216	MG
chr16:16546570-16547070	nbeal2	0.683611501939242	c4b::Inter;nbeal2::Inter	4.57067	0.0309017	0.0458939	MG	3.08215	0.0791166	0.0793216	MG
chr16:16701541-16702041	c4b	ND	c4b::TSS	4.88335	0.00837584	0.0574887	MG	4.09817	0.0587516	0.0325133	MG
chr16:17699632-17700132	si:dkey-17m8.1	0.754769709058155	si:dkey-17m8.1::TSS	1.39108	0.000164911	0.220973	MG	1.49933	0.000149463	0.271458	MG
chr16:19637190-19637690	macc1	0.8487597486321	macc1::TSS	2.81334	0.00215077	0.125997	MG	1.37718	0.0321576	0.0863287	MG
chr16:19662297-19662797	macc1	0.834251566473377	macc1::Body	3.52512	2.87157e-05	0.186421	MG	3.47723	3.78987e-07	0.198883	MG
chr16:19667200-19667700	macc1	0.909317169766867	macc1::Body	3.17995	4.71076e-06	0.222218	MG	2.33158	3.8654e-06	0.217255	MG
chr16:20400565-20401065	chn2	0.502456579118183	chn2::Body	2.9952	0.0134567	0.10863	MG	2.56034	0.00334315	0.110898	MG
chr16:20424500-20425000	chn2	0.485858824538299	chn2::Body	2.5564	0.270299	0.0316386	MG	3.32606	0.0165948	0.0748094	MG
chr16:20492487-20492987	chn2	0.79381907417825	chn2::TSS	1.72617	0.222056	0.0574437	MG	1.68449	0.0979205	0.114026	MG
chr16:21588253-21588753	ddr1	0.854548680681099	ddr1::Body	0.515018	0.186286	0.0790767	MG	1.38294	0.00936625	0.155499	MG
chr16:21619985-21620485	ddr1	0.670029954858648	ddr1::TSS	1.15909	0.0350978	0.0922994	MG	0.7196	0.0386526	0.0540903	MG
chr16:21639842-21640342	ddr1	0.706398604179286	ddr1::Inter	2.39583	0.145888	0.0354419	MG	2.41314	0.230775	0.0426822	MG
chr16:22556333-22556833	cgna	0.574793868342321	cgna::Body	4.42752	0.0272269	0.0772314	MG	1.138	0.16404	0.0383458	MG
chr16:22571045-22571545	cgna	0.639333374753203	cgna::Body	2.45138	6.33657e-08	0.36142	MG	1.72215	7.07518e-06	0.326386	MG
chr16:22775326-22775826	pbxip1b	0.679850349626451	pbxip1b::TSS	1.47105	0.0326334	0.11721	MG	1.37999	0.0385373	0.152853	MG
chr16:23229782-23230282	icn	0.382564016549271	icn::Inter	1.77455	0.198245	0.0368035	MG	2.89751	0.11708	0.0319445	MG
chr16:23277426-23277926	icn	0.436423494210673	icn::Inter	2.17208	0.161737	0.0880915	MG	1.8313	0.0366164	0.099615	MG
chr16:23427658-23428158	kcnn3	0.772974962590968	kcnn3::Inter	2.6522	8.65821e-12	0.319239	MG	2.07461	7.73689e-06	0.161546	MG
chr16:23430914-23431414	icn	0.612252959121227	icn::TSS	2.10641	3.32227e-07	0.266487	MG	4.11807	1.77006e-08	0.213239	MG
chr16:23431445-23431945	icn	0.537327858454999	icn::Body	1.71702	0.0328727	0.064485	MG	2.77792	0.0166768	0.0565729	MG
chr16:23554045-23554545	icn	0.384945824706515	icn::Inter	2.17263	2.92766e-06	0.329999	MG	0.67009	0.0382166	0.114833	MG
chr16:23598631-23599131	kcnn3	0.816947484366836	kcnn3::TSS	2.22159	0.00569746	0.114994	MG	1.06574	0.0587516	0.0779299	MG
chr16:23950742-23951242	nbn	0.722599730912611	nbn::Body	3.68893	0.00106379	0.121808	MG	2.96233	0.000373963	0.10445	MG
chr16:23956509-23957009	nbn	0.760407957666305	nbn::Body	4.34137	8.56711e-15	0.452369	MG	3.03066	2.17618e-09	0.312257	MG
chr16:23960601-23961101	apoeb	0.733768445099644	apoeb::TSS;nbn::Body	1.96893	0.000471995	0.298645	MG	1.37942	0.000185642	0.253398	MG
chr16:23960601-23961101	nbn	0.733768445099644	apoeb::TSS;nbn::Body	1.96893	0.000471995	0.298645	MG	1.37942	0.000185642	0.253398	MG
chr16:23961327-23961827	apoeb	0.611252206722494	apoeb::TSS;nbn::Body	1.83522	0.0316192	0.0564501	MG	1.6299	0.0346951	0.0412791	MG
chr16:23961327-23961827	nbn	0.611252206722494	apoeb::TSS;nbn::Body	1.83522	0.0316192	0.0564501	MG	1.6299	0.0346951	0.0412791	MG
chr16:23962660-23963160	apoeb	0.679259650933569	apoeb::Body;nbn::Body	2.01238	0.101815	0.0461475	MG	2.45854	0.00503769	0.0765418	MG
chr16:23962660-23963160	nbn	0.679259650933569	apoeb::Body;nbn::Body	2.01238	0.101815	0.0461475	MG	2.45854	0.00503769	0.0765418	MG
chr16:23964198-23964698	nbn	0.59988504617245	nbn::Body	2.77756	0.222056	0.0118083	MG	3.57353	0.00700394	0.0957332	MG
chr16:23972238-23972738	nbn	0.629520513063269	nbn::Body	2.67506	0.0468414	0.0876098	MG	2.77856	0.00515329	0.0973247	MG
chr16:24501189-24501689	fxyd6l	0.663317311983878	fxyd6l::Inter;si:dkey-56f14.7::Inter	1.88028	0.13956	0.0847837	MG	2.74652	0.000955575	0.101383	MG
chr16:24501189-24501689	si:dkey-56f14.7	0.663317311983878	fxyd6l::Inter;si:dkey-56f14.7::Inter	1.88028	0.13956	0.0847837	MG	2.74652	0.000955575	0.101383	MG
chr16:24609752-24610252	fxyd6l	0.873215720017346	fxyd6l::Body	3.37328	2.00585e-08	0.262734	MG	4.80509	1.34196e-11	0.274565	MG
chr16:24610324-24610824	fxyd6l	0.779732623919837	fxyd6l::Body	3.03827	0.000703271	0.0892671	MG	1.97929	0.000380433	0.105672	MG
chr16:24610843-24611343	fxyd6l	0.661163993892683	fxyd6l::Body	2.61247	0.0468414	0.0774574	MG	1.64089	0.0657613	0.0677719	MG
chr16:24612654-24613154	fxyd6l	0.640192865545539	fxyd6l::TSS	1.82486	0.301352	0.111762	MG	0.857597	0.0535289	0.06036	MG
chr16:24614957-24615457	fxyd6l	0.5304317823934	fxyd6l::Body	0.654056	0.135345	0.0673946	MG	0.820889	0.0385355	0.115421	MG
chr16:24624144-24624644	fxyd6l	0.867732494824386	fxyd6l::Body;si:dkey-56f14.7::TSS	3.63076	0.0061716	0.152138	MG	5.26644	7.88839e-08	0.214426	MG
chr16:24624144-24624644	si:dkey-56f14.7	0.867732494824386	fxyd6l::Body;si:dkey-56f14.7::TSS	3.63076	0.0061716	0.152138	MG	5.26644	7.88839e-08	0.214426	MG
chr16:25438185-25438685	atxn1b	0.605821607213764	atxn1b::Inter	2.63649	0.0278898	0.0524988	MG	3.28413	0.0253313	0.0593915	MG
chr16:25460874-25461374	atxn1b	0.71570023700996	atxn1b::Inter	1.7663	0.20334	0.0729906	MG	1.50952	0.0621105	0.124106	MG
chr16:25563914-25564414	atxn1b	0.466090124416458	atxn1b::TSS	1.30711	0.0305916	0.160832	MG	1.04313	0.120708	0.13788	MG
chr16:25568105-25568605	atxn1b	0.700901558253067	atxn1b::TSS	1.78076	4.96569e-14	0.838964	MG	1.23679	1.5548e-09	0.63581	MG
chr16:25579120-25579620	atxn1b	0.661574315049413	atxn1b::Inter	3.43434	2.00023e-05	0.192831	MG	2.73623	9.72199e-07	0.160379	MG
chr16:2583129-2583629	tgfb2	0.489075005017783	tgfb2::Inter	1.88968	0.0472077	0.0583182	MG	1.43344	0.101123	0.062218	MG
chr16:2679045-2679545	tgfb2	0.367387284175386	tgfb2::Inter	3.81974	0.0632967	0.069698	MG	4.49945	0.0105713	0.0435862	MG
chr16:26866065-26866565	galnt1	0.579875428991775	galnt1::Body	2.24626	0.12255	0.0735074	MG	1.794	0.054063	0.0615045	MG
chr16:26948251-26948751	galnt1	0.498718551368245	galnt1::Body	4.17037	0.000312214	0.132826	MG	4.50972	4.73539e-06	0.186662	MG
chr16:27621207-27621707	steap4	0.644183077119013	steap4::Inter	2.49496	0.00221957	0.214835	MG	1.51568	0.0269946	0.089409	MG
chr16:27749002-27749502	steap4	0.848955218375812	steap4::TSS	4.01851	6.6702e-09	0.32503	MG	3.49923	1.57184e-06	0.189928	MG
chr16:2778247-2778747	tgfb2	0.473214306824908	tgfb2::Body	5.12457	2.69262e-06	0.188572	MG	4.98844	5.16132e-08	0.252296	MG
chr16:2791226-2791726	tgfb2	0.620300154462297	tgfb2::Body	2.11614	0.026736	0.126884	MG	1.70382	0.0012832	0.112546	MG
chr16:2807026-2807526	tgfb2	0.660989742794758	tgfb2::TSS	2.24462	0.0639287	0.0856488	MG	2.46137	0.1029	0.0733353	MG
chr16:2807897-2808397	tgfb2	0.746240869308823	tgfb2::TSS	2.29611	6.18435e-07	0.315114	MG	2.64618	9.2799e-10	0.393568	MG
chr16:28640651-28641151	zgc:171704	0.556839382895283	zgc:171704::Inter	1.42092	0.273413	0.0277452	MG	3.73353	0.0382166	0.0909683	MG
chr16:28790294-28790794	zgc:171704	ND	zgc:171704::TSS	2.08952	0.145888	0.0302843	MG	2.23654	0.120691	0.0452248	MG
chr16:28791850-28792350	zgc:171704	0.857864548934321	zgc:171704::TSS	3.40631	1.18663e-07	0.318585	MG	2.6923	0.000248497	0.179314	MG
chr16:28793620-28794120	zgc:171704	0.410173668110159	zgc:171704::Body	2.1713	0.198245	0.0333614	MG	2.73936	0.0842838	0.0425661	MG
chr16:28804383-28804883	zgc:171704	0.816417945000093	zgc:171704::Inter	3.84741	6.11755e-15	0.709533	MG	3.31225	3.11281e-09	0.385002	MG
chr16:29211170-29211670	CR848047.1	0.61019610658533	CR848047.1::Inter	0.996241	0.284051	0.0474198	MG	1.87837	0.086499	0.0705481	MG
chr16:29215311-29215811	CR848047.1	0.797634091019277	CR848047.1::Inter	1.93393	2.64153e-06	0.486128	MG	1.91656	1.93239e-06	0.299443	MG
chr16:29218498-29218998	CR848047.1	0.807498146227227	CR848047.1::Inter	2.64514	5.77129e-06	0.308525	MG	1.80752	1.17086e-09	0.258095	MG
chr16:29245036-29245536	CR848047.1	0.860472071795981	CR848047.1::Inter	2.29795	2.29675e-08	0.486588	MG	0.692823	0.00305943	0.187432	MG
chr16:29253520-29254020	CR848047.1	0.926866422930651	CR848047.1::Inter;rhbg::Inter	2.31243	2.87066e-12	0.726991	MG	2.80627	5.33416e-21	0.764866	MG
chr16:29253520-29254020	rhbg	0.926866422930651	CR848047.1::Inter;rhbg::Inter	2.31243	2.87066e-12	0.726991	MG	2.80627	5.33416e-21	0.764866	MG
chr16:29257089-29257589	CR848047.1	0.83810507074772	CR848047.1::Inter;rhbg::Inter	1.41532	8.65108e-07	0.361385	MG	1.20093	1.04088e-05	0.267913	MG
chr16:29257089-29257589	rhbg	0.83810507074772	CR848047.1::Inter;rhbg::Inter	1.41532	8.65108e-07	0.361385	MG	1.20093	1.04088e-05	0.267913	MG
chr16:29257694-29258194	CR848047.1	0.860149942117538	CR848047.1::Inter;rhbg::Inter	1.44176	0.000538527	0.143751	MG	1.41887	0.000423648	0.132859	MG
chr16:29257694-29258194	rhbg	0.860149942117538	CR848047.1::Inter;rhbg::Inter	1.44176	0.000538527	0.143751	MG	1.41887	0.000423648	0.132859	MG
chr16:29263733-29264233	CR848047.1	0.824839754508213	CR848047.1::Inter;rhbg::Inter	0.88718	0.261352	0.0839015	MG	2.11148	0.00806588	0.110831	MG
chr16:29263733-29264233	rhbg	0.824839754508213	CR848047.1::Inter;rhbg::Inter	0.88718	0.261352	0.0839015	MG	2.11148	0.00806588	0.110831	MG
chr16:29275264-29275764	rhbg	0.767360137793092	rhbg::Body	2.02441	0.198245	0.0357359	MG	1.05344	0.266429	0.0329491	MG
chr16:29275885-29276385	rhbg	0.907284834086484	rhbg::TSS	3.32174	2.9995e-10	0.395434	MG	2.60431	3.48299e-09	0.296292	MG
chr16:29276940-29277440	rhbg	0.910097000684602	rhbg::TSS	3.6067	2.06173e-06	0.240375	MG	2.41356	3.19511e-05	0.234644	MG
chr16:29471227-29471727	mcl1b	0.689519271503316	mcl1b::Inter;rhbg::Inter	2.50626	0.00256193	0.185104	MG	0.937058	0.0179576	0.0542251	MG
chr16:29471227-29471727	rhbg	0.689519271503316	mcl1b::Inter;rhbg::Inter	2.50626	0.00256193	0.185104	MG	0.937058	0.0179576	0.0542251	MG
chr16:29497170-29497670	rhbg	0.533644524285154	rhbg::Inter	2.76997	0.0693258	0.0461552	MG	3.78843	0.00238634	0.0539561	MG
chr16:29497692-29498192	rhbg	0.458352549487379	rhbg::Inter	1.31215	0.206115	0.0366967	MG	1.14484	0.0587516	0.0467542	MG
chr16:29585670-29586170	mcl1b	0.581010349412907	mcl1b::TSS	0.91388	0.121345	0.230552	MG	0.72054	0.00695981	0.211512	MG
chr16:29612248-29612748	mcl1b	0.668945892565254	mcl1b::Inter	4.45621	0.0176324	0.0993915	MG	4.1987	0.000453503	0.106765	MG
chr16:29615622-29616122	mcl1b	0.706296468704461	mcl1b::Inter	4.76278	0.00723552	0.0934568	MG	5.09614	0.000593028	0.109394	MG
chr16:3009190-3009690	tgfb2	0.368981412272332	tgfb2::Inter	5.10926	0.0309017	0.0675758	MG	3.69181	0.0380391	0.0717885	MG
chr16:30730532-30731032	ptk2ab	0.569950321112761	ptk2ab::Inter	1.43708	0.00147798	0.163561	MG	2.97911	1.0635e-07	0.284139	MG
chr16:30846622-30847122	ptk2ab	0.653640305357908	ptk2ab::TSS	2.59025	0.0137882	0.110513	MG	2.08935	0.00192347	0.162458	MG
chr16:30849904-30850404	ptk2ab	0.491121023498559	ptk2ab::Body	2.89281	0.102086	0.0648806	MG	3.47206	0.00154484	0.0714878	MG
chr16:35343716-35344216	si:dkey-34d22.1	0.834359793744232	si:dkey-34d22.1::TSS	1.46349	0.0104428	0.0930794	MG	2.67779	0.00245798	0.144536	MG
chr16:35573428-35573928	si:dkey-34d22.1	0.701666747811081	si:dkey-34d22.1::Inter	2.92631	0.00423755	0.163846	MG	3.79337	1.36262e-05	0.145561	MG
chr16:35581382-35581882	si:dkey-34d22.1	0.746242530817353	si:dkey-34d22.1::Inter	1.97388	0.0955536	0.0310433	MG	1.50475	0.057926	0.028786	MG
chr16:35661501-35662001	map7d1a	0.768244202784795	map7d1a::TSS	1.21885	0.0578879	0.111672	MG	0.742861	0.266429	0.058758	MG
chr16:38089641-38090141	cdc42se1	0.386352903665921	cdc42se1::Inter	4.67996	0.106018	0.0496642	MG	3.04574	0.0571734	0.0452293	MG
chr16:38310339-38310839	cdc42se1	0.772727746677355	cdc42se1::Inter	2.75161	0.270299	0.0352335	MG	3.28705	0.00706421	0.0828307	MG
chr16:38333088-38333588	cdc42se1	0.700506894853351	cdc42se1::TSS	2.75232	0.0215511	0.0680076	MG	1.22948	0.185335	0.0294862	MG
chr16:38333736-38334236	cdc42se1	0.829500538062968	cdc42se1::TSS	2.43946	0.000271971	0.215099	MG	1.4865	0.00126821	0.101115	MG
chr16:4145086-4145586	vegfaa	0.538241259169945	vegfaa::Inter	2.93697	0.00579849	0.0993485	MG	2.66996	0.0262768	0.0845714	MG
chr16:4205998-4206498	vegfaa	0.80093053991715	vegfaa::Inter	1.98676	0.0215762	0.0839187	MG	1.87224	0.000473791	0.157993	MG
chr16:4212286-4212786	vegfaa	0.752660238875005	vegfaa::Inter	2.64124	4.53625e-06	0.219876	MG	3.05538	1.2454e-09	0.349864	MG
chr16:42855975-42856475	si:dkey-7j14.6	0.477587795086613	si:dkey-7j14.6::Inter	4.35665	0.00725599	0.0733486	MG	1.36906	0.237153	0.0244194	MG
chr16:42880195-42880695	si:dkey-7j14.6	0.415234280957477	si:dkey-7j14.6::Inter	1.56845	0.10302	0.101413	MG	2.61967	0.00200148	0.151979	MG
chr16:42897280-42897780	si:dkey-7j14.6	0.78511278900715	si:dkey-7j14.6::Inter	1.95182	1.68793e-08	0.483898	MG	0.831825	0.00265673	0.187454	MG
chr16:43041135-43041635	si:dkey-7j14.6	0.74048497655033	si:dkey-7j14.6::TSS	1.41527	0.0359897	0.160745	MG	1.3091	0.00805758	0.160002	MG
chr16:4317177-4317677	vegfaa	0.550761212411055	vegfaa::Body	1.11815	0.0949443	0.0365765	MG	0.637719	0.234027	0.0323114	MG
chr16:4317706-4318206	vegfaa	0.611218947736751	vegfaa::TSS	0.866613	0.301352	0.215922	MG	0.694355	0.127852	0.179672	MG
[truncated: 12,997 more rows]

## Sheet: tab3
ID	Gene	Cor	LD::p_val	LD::avg_log2FC	LD::pct.1	LD::pct.2	LD::p_val_adj	LD::cluster	NMDA::p_val	NMDA::avg_log2FC	NMDA::pct.1	NMDA::pct.2	NMDA::p_val_adj	NMDA::cluster
[truncated: 184 more rows]

[truncated: 5 more sheets: tab4, tab5, tab6, tab7, tab8]
