# Supplementary material for: Common and divergent gene regulatory networks control injury-induced and developmental neurogenesis in zebrafish retina
Source: bioRxiv preprint, doi:10.1101/2023.08.08.552451, version 1 (2023-08-08)
Supplement: Table ST4 [file 552451_file19.xlsx]

## Sheet: list
Table ST4: Regulatory relationships among TFs selectively active in LD vs. NMDA samples.
tab1: Motif gene correlation of all TF-Motif pairs
tab2: LD MG enriched GRNs
tab3: NMDA MG enriched GRNs
tab4: DEGs in Microglia/Macrophage after LD vs. NMDA treatment

## Sheet: tab1
ID	Gene	Gene_Motif_Cor	TAG
M00008_2.00	hmga1a	0	LD
M00008_2.00	hmga2	-0.00895476	LD
M00045_2.00	foxj2	0.0166508	LD
M00056_2.00	alx1	-0.0466722	LD
M00056_2.00	gbx2	-0.0069636	LD
M00056_2.00	rx1	-0.0846345	LD
M00056_2.00	rx2	-0.054177	LD
M00056_2.00	rx3	0.0329801	LD
M00056_2.00	vsx1	0.0559319	LD
M00066_2.00	rfx1a	0.00803971	LD
M00066_2.00	rfx1b	0.0137236	LD
M00066_2.00	rfx2	0.13073	LD
M00066_2.00	rfx3	0.0297851	LD
M00066_2.00	rfx4	-0.0472897	LD
M00070_2.00	cica	-0.0147165	LD
M00070_2.00	sox10	0.0335774	LD
M00070_2.00	sox11a	0.0706455	LD
M00070_2.00	sox11b	0.0204093	LD
M00070_2.00	sox12	0.0816109	LD
M00070_2.00	sox13	0.177426	LD
M00070_2.00	sox2	0.15143	LD
M00070_2.00	sox32	0.00225482	LD
M00070_2.00	sox4a	0	LD
M00070_2.00	sox4b	0.00432454	LD
M00070_2.00	sox5	0.149606	LD
M00070_2.00	sox6	0.00617981	LD
M00070_2.00	sox8a	0.142823	LD
M00070_2.00	sox9a	0.0577433	LD
M00070_2.00	sox9b	0.0630584	LD
M00111_2.00	tfap2a	0.116838	LD
M00111_2.00	tfap2b	0.0856435	LD
M00111_2.00	tfap2c	0.118052	LD
M00111_2.00	tfap2d	0.0623912	LD
M00112_2.00	tfap2a	0.106687	LD
M00112_2.00	tfap2b	0.0886621	LD
M00112_2.00	tfap2c	0.113474	LD
M00112_2.00	tfap2d	0.0440854	LD
M00113_2.00	tfap2a	0.135424	LD
M00113_2.00	tfap2b	0.0839978	LD
M00113_2.00	tfap2c	0.145296	LD
M00113_2.00	tfap2d	0.0793887	LD
M00114_2.00	tfap2a	0.10877	LD
M00114_2.00	tfap2b	0.0806752	LD
M00114_2.00	tfap2c	0.108081	LD
M00114_2.00	tfap2d	0.0378879	LD
M00115_2.00	arid3a	-0.0228435	LD
M00115_2.00	arid3b	-0.0945567	LD
M00115_2.00	arid3c	-0.0547776	LD
M00116_2.00	arid5b	-0.0751317	LD
M00116_2.00	zgc:77151	-0.0080938	LD
M00117_2.00	ascl1a	0.0613536	LD
M00118_2.00	tcf12	0.500401	LD
M00118_2.00	tcf3a	0.144778	LD
M00118_2.00	tcf3b	0.104624	LD
M00119_2.00	bhlhe40	-0.0636546	LD
M00119_2.00	bhlhe41	0.0221889	LD
M00121_2.00	max	0.0465625	LD
M00122_2.00	max	0.00434571	LD
M00123_2.00	mafba	0.0776274	LD
M00123_2.00	mafgb	0.0311529	LD
M00123_2.00	mafk	-0.00451578	LD
M00123_2.00	nrl	0.054138	LD
M00124_2.00	atf1	0.0155947	LD
M00124_2.00	creb1a	-0.0598758	LD
M00124_2.00	creb1b	-0.0598753	LD
M00124_2.00	crema	0.0295157	LD
M00124_2.00	cremb	0.0501462	LD
M00125_2.00	atf3	0.230216	LD
M00125_2.00	jdp2a	-0.0233223	LD
M00126_2.00	mafba	0.325623	LD
M00126_2.00	mafgb	0.0624191	LD
M00126_2.00	mafk	-0.0136623	LD
M00126_2.00	nrl	0.179813	LD
M00133_2.00	sp3a	0.048507	LD
M00133_2.00	sp3b	0.00861938	LD
M00133_2.00	sp4	0.0157883	LD
M00134_2.00	klf12a	-0.0788576	LD
M00134_2.00	klf12b	-0.114336	LD
M00134_2.00	klf6a	-0.00284567	LD
M00134_2.00	klf7a	0.066483	LD
M00134_2.00	klf7b	0.116498	LD
M00135_2.00	zbtb7b	-0.0354783	LD
M00137_2.00	zic2a	0.0285358	LD
M00137_2.00	zic2b	0.163334	LD
M00137_2.00	zic3	0.217013	LD
M00137_2.00	zic5	0.0144824	LD
M00139_2.00	znf148	0.0267448	LD
M00139_2.00	znf281a	0.151996	LD
M00139_2.00	znf281b	0.1227	LD
M00143_2.00	znf740b	0.0791264	LD
M00150_2.00	zic2a	0.0198794	LD
M00150_2.00	zic2b	0.172885	LD
M00150_2.00	zic3	0.234563	LD
M00150_2.00	zic5	-0.00734416	LD
M00151_2.00	zic2a	0.0310743	LD
M00151_2.00	zic2b	0.177203	LD
M00151_2.00	zic3	0.244274	LD
M00151_2.00	zic5	0.00351992	LD
M00152_2.00	zbtb3	0.0296217	LD
M00153_2.00	e2f3	0.120101	LD
M00153_2.00	e2f4	0.0561254	LD
M00153_2.00	e2f5	-0.00119744	LD
M00153_2.00	e2f7	0.0750909	LD
M00154_2.00	e2f3	0.129379	LD
M00154_2.00	e2f4	0.0504358	LD
M00154_2.00	e2f5	0.00936363	LD
M00154_2.00	e2f7	0.0891842	LD
M00155_2.00	spi1a	-0.00366304	LD
M00156_2.00	elf2a	0.0188913	LD
M00156_2.00	elf2b	0.0271896	LD
M00157_2.00	elf2a	0.00781016	LD
M00157_2.00	elf2b	0.00908959	LD
M00157_2.00	elk1	-0.0180691	LD
M00157_2.00	elk3	0.018198	LD
M00157_2.00	elk4	0.00901932	LD
M00157_2.00	erf	0.0104716	LD
M00157_2.00	erfl3	-0.000642958	LD
M00157_2.00	etv1	-0.00875696	LD
M00157_2.00	etv4	-0.00780731	LD
M00157_2.00	etv5a	0.0145759	LD
M00157_2.00	etv5b	-0.00194856	LD
M00157_2.00	gabpa	-0.00506593	LD
M00158_2.00	elf2a	0.011644	LD
M00158_2.00	elf2b	0.0083743	LD
M00159_2.00	elf2a	-0.0197106	LD
M00159_2.00	elf2b	-0.0155311	LD
M00160_2.00	FOXK2	-0.0654414	LD
M00160_2.00	foxg1a	-0.000572089	LD
M00160_2.00	foxg1b	0.00538474	LD
M00160_2.00	foxi2	0.0321312	LD
M00160_2.00	foxj1a	-0.0252716	LD
M00160_2.00	foxj2	0.00864303	LD
M00160_2.00	foxj3	-0.00120689	LD
M00160_2.00	foxk1	-0.00198553	LD
M00160_2.00	foxk2	0.00398276	LD
M00160_2.00	foxp1a	0.00567633	LD
M00160_2.00	foxp1b	-0.0501345	LD
M00160_2.00	foxp4	-0.0540036	LD
M00161_2.00	foxj1a	0.063146	LD
M00163_2.00	FOXK2	-0.0684847	LD
M00163_2.00	foxi2	0.0378106	LD
M00163_2.00	foxj3	-0.0179954	LD
M00163_2.00	foxk1	0.00434033	LD
M00163_2.00	foxk2	-0.0452652	LD
M00164_2.00	foxg1a	-0.0145602	LD
M00164_2.00	foxg1b	-0.0129282	LD
M00164_2.00	foxi2	-0.00808313	LD
M00164_2.00	foxp1a	-0.0878852	LD
M00165_2.00	gata1b	0.0097113	LD
M00166_2.00	gata1b	-0.00239381	LD
M00167_2.00	gata1b	-0.00545306	LD
M00169_2.00	six3a	-0.0433175	LD
M00169_2.00	six3b	-0.0434429	LD
M00169_2.00	six6a	0.0274847	LD
M00169_2.00	six6b	-0.0404117	LD
M00169_2.00	six7	0.101497	LD
M00171_2.00	hmbox1a	-0.0155202	LD
M00171_2.00	zgc:91944	0.00828737	LD
M00172_2.00	alx1	-0.0119986	LD
M00172_2.00	gbx2	0.012056	LD
M00172_2.00	hmx1	0.00286209	LD
M00172_2.00	hmx3a	-0.0250541	LD
M00172_2.00	hmx4	0.00444182	LD
M00172_2.00	lhx4	0.00755338	LD
M00172_2.00	rx1	-0.00812129	LD
M00172_2.00	rx2	0.00669583	LD
M00172_2.00	rx3	-0.0235582	LD
M00172_2.00	vax1	-0.0154526	LD
M00172_2.00	vax2	0.0128371	LD
M00172_2.00	vsx1	0.00416825	LD
M00175_2.00	irf9	0.0292543	LD
M00178_2.00	srfa	0.006503	LD
M00179_2.00	myb	0.137694	LD
M00179_2.00	mybl1	0.18126	LD
M00180_2.00	myb	0.175867	LD
M00180_2.00	mybl1	0.23026	LD
M00181_2.00	esrrd	-0.010467	LD
M00181_2.00	nr2c1	0.017954	LD
M00181_2.00	nr2c2	0.018566	LD
M00181_2.00	nr2f1a	-0.00812847	LD
M00181_2.00	nr2f1b	0.00610196	LD
M00181_2.00	nr2f5	0.124493	LD
M00181_2.00	nr2f6a	0.0271742	LD
M00181_2.00	nr2f6b	-0.0290753	LD
M00181_2.00	nr4a3	0.00828196	LD
M00181_2.00	nr6a1a	0.014157	LD
M00181_2.00	nr6a1b	0.0170045	LD
M00181_2.00	pparaa	-0.0273412	LD
M00181_2.00	pparab	-0.0452203	LD
M00181_2.00	pparda	-0.00341607	LD
M00181_2.00	ppardb	-0.00989095	LD
M00181_2.00	raraa	-0.0544834	LD
M00181_2.00	rarab	-0.025982	LD
M00181_2.00	rarga	0.0815959	LD
M00181_2.00	roraa	-0.0511217	LD
M00181_2.00	rorab	-0.0843092	LD
M00181_2.00	rorb	0.1411	LD
M00181_2.00	rorc	-0.0224871	LD
M00181_2.00	rorca	0.0690435	LD
M00181_2.00	rorcb	0.0988689	LD
M00181_2.00	rxraa	0.0731955	LD
M00181_2.00	rxrab	0.0107179	LD
M00181_2.00	rxrba	-0.00558146	LD
M00181_2.00	rxrbb	0.00188104	LD
M00181_2.00	rxrgb	0.0221449	LD
M00181_2.00	thraa	-0.0133806	LD
M00181_2.00	thrab	-0.119101	LD
M00181_2.00	thrb	0.160315	LD
M00182_2.00	hnf4a	-0.0240655	LD
M00182_2.00	nr2c1	0.019495	LD
M00182_2.00	nr2e1	0.208183	LD
M00182_2.00	nr2f1a	-0.0117944	LD
M00182_2.00	nr2f1b	-0.0418412	LD
M00182_2.00	nr2f5	0.206871	LD
M00182_2.00	nr2f6a	-0.0127919	LD
M00182_2.00	nr2f6b	-0.00078685	LD
M00182_2.00	nr6a1a	-0.000402301	LD
M00182_2.00	nr6a1b	-0.0124852	LD
M00182_2.00	rxrba	0.0383266	LD
M00182_2.00	rxrbb	0.0203834	LD
M00183_2.00	esr1	-0.00201818	LD
M00183_2.00	esr2a	0.0303064	LD
M00183_2.00	esr2b	-0.0122904	LD
M00183_2.00	esrra	0.074501	LD
M00183_2.00	esrrb	0.0187171	LD
M00183_2.00	esrrd	0.0200052	LD
M00183_2.00	esrrga	0.158226	LD
M00183_2.00	esrrgb	0.00209922	LD
M00184_2.00	esr1	-0.0159975	LD
M00184_2.00	esr2a	0.0649999	LD
M00184_2.00	esr2b	0.00643589	LD
M00184_2.00	hnf4a	-0.00383313	LD
M00184_2.00	nr1d1	0.00251823	LD
M00184_2.00	nr1d2a	-0.00511745	LD
M00184_2.00	nr1d2b	-0.0252131	LD
M00184_2.00	nr1d4a	0.00905823	LD
M00184_2.00	nr1d4b	-0.0107249	LD
M00184_2.00	nr1h3	0.025889	LD
M00184_2.00	nr2c1	0.0180661	LD
M00184_2.00	nr2c2	0.0438647	LD
M00184_2.00	nr2f1a	0.0186513	LD
M00184_2.00	nr2f1b	0.060398	LD
M00184_2.00	nr2f5	0.0757642	LD
M00184_2.00	nr2f6a	-0.0138559	LD
M00184_2.00	nr2f6b	-0.0131851	LD
M00184_2.00	nr4a3	-0.00930875	LD
M00184_2.00	nr6a1a	0.00894069	LD
M00184_2.00	nr6a1b	0.0109687	LD
M00184_2.00	pparaa	-0.0120556	LD
M00184_2.00	pparab	0.00300076	LD
M00184_2.00	pparda	-0.0141256	LD
M00184_2.00	ppardb	-0.0224531	LD
M00184_2.00	raraa	-0.0453057	LD
M00184_2.00	rarab	-0.0637017	LD
M00184_2.00	rarga	0.0349818	LD
M00184_2.00	roraa	-0.0637408	LD
M00184_2.00	rorab	-0.0549384	LD
M00184_2.00	rorb	0.0869793	LD
M00184_2.00	rorc	-0.0229306	LD
M00184_2.00	rorca	0.0576787	LD
M00184_2.00	rorcb	0.0728637	LD
M00184_2.00	rxraa	0.00891307	LD
M00184_2.00	rxrab	-0.00677362	LD
M00184_2.00	rxrba	0.0216599	LD
M00184_2.00	rxrbb	-0.0168996	LD
M00184_2.00	rxrgb	0.103785	LD
M00184_2.00	thraa	-0.000602051	LD
M00184_2.00	thrab	-0.0362843	LD
M00184_2.00	thrb	0.118074	LD
M00185_2.00	esr1	0.00716623	LD
M00185_2.00	esr2a	0.0324301	LD
M00185_2.00	esr2b	-0.0133059	LD
M00185_2.00	nr1d1	0.00209742	LD
M00185_2.00	nr1d2a	0.00385072	LD
M00185_2.00	nr1d2b	0.00561058	LD
M00185_2.00	nr1d4a	0.0028911	LD
M00185_2.00	nr1d4b	0.00753407	LD
M00185_2.00	nr1h3	0.0491012	LD
M00185_2.00	nr2c1	0.00343013	LD
M00185_2.00	nr2c2	0.0225273	LD
M00185_2.00	nr2f1a	0.0210445	LD
M00185_2.00	nr2f1b	0.0842565	LD
M00185_2.00	nr2f5	0.0408561	LD
M00185_2.00	nr2f6a	-0.0157912	LD
M00185_2.00	nr2f6b	-0.00481928	LD
M00185_2.00	nr6a1a	-0.0198954	LD
M00185_2.00	nr6a1b	-0.00216631	LD
M00185_2.00	pparaa	0.00414325	LD
M00185_2.00	pparab	0.0321123	LD
M00185_2.00	pparda	-0.00307475	LD
M00185_2.00	ppardb	-0.0184069	LD
M00185_2.00	raraa	-0.0132629	LD
M00185_2.00	rarab	-0.0461978	LD
M00185_2.00	rarga	-0.00344524	LD
M00185_2.00	roraa	-0.0819663	LD
M00185_2.00	rorab	-0.0605662	LD
M00185_2.00	rorb	-0.0187995	LD
M00185_2.00	rorc	-0.0418872	LD
M00185_2.00	rorca	0.00553815	LD
M00185_2.00	rorcb	0.00333112	LD
M00185_2.00	rxraa	0.00960921	LD
M00185_2.00	rxrab	0.0105434	LD
M00185_2.00	rxrba	0.00697661	LD
M00185_2.00	rxrbb	-0.00546414	LD
M00185_2.00	rxrgb	0.16941	LD
M00186_2.00	rfx1a	-0.0462255	LD
M00186_2.00	rfx1b	-0.00759155	LD
M00186_2.00	rfx2	0.327596	LD
M00186_2.00	rfx3	0.0372444	LD
M00186_2.00	rfx4	-0.0101712	LD
M00187_2.00	rfx5	-0.0385148	LD
M00188_2.00	rfx1a	0.012891	LD
M00188_2.00	rfx1b	-0.00172568	LD
M00188_2.00	rfx2	0.0545399	LD
M00188_2.00	rfx3	-0.00991545	LD
M00188_2.00	rfx4	-0.0309144	LD
M00190_2.00	GMEB2	-0.00169821	LD
M00190_2.00	gmeb1	0.00405445	LD
M00192_2.00	smad3a	-0.00433962	LD
M00192_2.00	smad3b	0.0351736	LD
M00192_2.00	smad9	0.00801173	LD
M00193_2.00	lef1	-0.0248251	LD
M00193_2.00	tcf7	-0.00469626	LD
M00193_2.00	tcf7l1a	0.00222224	LD
M00193_2.00	tcf7l1b	0.0023993	LD
M00193_2.00	tcf7l2	0.0437263	LD
M00194_2.00	hbp1	-0.0039535	LD
M00195_2.00	bbx	-0.0222108	LD
M00195_2.00	cica	0.0186549	LD
M00196_2.00	bbx	0.0704149	LD
M00196_2.00	cica	0.00299473	LD
M00197_2.00	sox10	0.0616488	LD
M00197_2.00	sox11a	0.0465471	LD
M00197_2.00	sox11b	-0.018498	LD
M00197_2.00	sox12	0.0347375	LD
M00197_2.00	sox13	0.31565	LD
M00197_2.00	sox2	0.25836	LD
M00197_2.00	sox32	-0.0216195	LD
M00197_2.00	sox4a	0	LD
M00197_2.00	sox4b	-0.0276961	LD
M00197_2.00	sox5	0.142314	LD
M00197_2.00	sox6	0.0258747	LD
M00197_2.00	sox8a	0.252464	LD
M00197_2.00	sox9a	0.115911	LD
M00197_2.00	sox9b	0.0926038	LD
M00198_2.00	lef1	-0.0258006	LD
M00198_2.00	tcf7	0.0242935	LD
M00198_2.00	tcf7l1a	0.0618615	LD
M00198_2.00	tcf7l1b	0.0840065	LD
M00198_2.00	tcf7l2	0.154676	LD
M00199_2.00	sox10	-0.020787	LD
M00199_2.00	sox11a	0.0482515	LD
M00199_2.00	sox11b	0.0526341	LD
M00199_2.00	sox12	0.0735625	LD
M00199_2.00	sox13	-0.0100414	LD
M00199_2.00	sox2	-0.00542773	LD
M00199_2.00	sox32	-0.000802476	LD
M00199_2.00	sox4a	0	LD
M00199_2.00	sox4b	0.00212637	LD
M00199_2.00	sox5	0.0190763	LD
M00199_2.00	sox6	-0.00586841	LD
M00199_2.00	sox8a	0.0060411	LD
M00199_2.00	sox9a	-4.71252e-05	LD
M00199_2.00	sox9b	0.021407	LD
M00200_2.00	lef1	-0.0245841	LD
M00200_2.00	tcf7	0.0276564	LD
M00200_2.00	tcf7l1a	0.0552359	LD
M00200_2.00	tcf7l1b	0.089823	LD
M00200_2.00	tcf7l2	0.174742	LD
M00201_2.00	sox10	0.0430452	LD
M00201_2.00	sox11a	0.0490856	LD
M00201_2.00	sox11b	0.00449219	LD
M00201_2.00	sox12	0.0484385	LD
M00201_2.00	sox13	0.235587	LD
M00201_2.00	sox2	0.188633	LD
M00201_2.00	sox32	0.0164078	LD
M00201_2.00	sox4a	0	LD
M00201_2.00	sox4b	-0.0229108	LD
M00201_2.00	sox5	0.130059	LD
M00201_2.00	sox6	0.0170071	LD
M00201_2.00	sox8a	0.170916	LD
M00201_2.00	sox9a	0.0798368	LD
M00201_2.00	sox9b	0.0658143	LD
M00202_2.00	sox10	0.0217561	LD
M00202_2.00	sox11a	0.0546324	LD
M00202_2.00	sox11b	0.016627	LD
M00202_2.00	sox12	0.0593472	LD
M00202_2.00	sox13	0.146741	LD
M00202_2.00	sox2	0.141574	LD
M00202_2.00	sox32	-0.00504817	LD
M00202_2.00	sox4a	0	LD
M00202_2.00	sox4b	-0.0190781	LD
M00202_2.00	sox5	0.0840502	LD
M00202_2.00	sox6	0.010988	LD
M00202_2.00	sox8a	0.110847	LD
M00202_2.00	sox9a	0.0700557	LD
M00202_2.00	sox9b	0.0474055	LD
M00203_2.00	sox10	0.0616488	LD
M00203_2.00	sox11a	0.0465471	LD
M00203_2.00	sox11b	-0.018498	LD
M00203_2.00	sox12	0.0347375	LD
M00203_2.00	sox13	0.31565	LD
M00203_2.00	sox2	0.25836	LD
M00203_2.00	sox32	-0.0216195	LD
M00203_2.00	sox4a	0	LD
M00203_2.00	sox4b	-0.0276961	LD
M00203_2.00	sox5	0.142314	LD
M00203_2.00	sox6	0.0258747	LD
M00203_2.00	sox8a	0.252464	LD
M00203_2.00	sox9a	0.115911	LD
M00203_2.00	sox9b	0.0926038	LD
M00204_2.00	sox10	0.0616488	LD
M00204_2.00	sox11a	0.0465471	LD
M00204_2.00	sox11b	-0.018498	LD
M00204_2.00	sox12	0.0347375	LD
M00204_2.00	sox13	0.31565	LD
M00204_2.00	sox2	0.25836	LD
M00204_2.00	sox32	-0.0216195	LD
M00204_2.00	sox4a	0	LD
M00204_2.00	sox4b	-0.0276961	LD
M00204_2.00	sox5	0.142314	LD
M00204_2.00	sox6	0.0258747	LD
M00204_2.00	sox8a	0.252464	LD
M00204_2.00	sox9a	0.115911	LD
M00204_2.00	sox9b	0.0926038	LD
M00205_2.00	sox10	0.071498	LD
M00205_2.00	sox11a	0.0866482	LD
M00205_2.00	sox11b	0.0113587	LD
M00205_2.00	sox12	0.0616797	LD
M00205_2.00	sox13	0.334943	LD
M00205_2.00	sox2	0.26204	LD
M00205_2.00	sox32	-0.0057272	LD
M00205_2.00	sox4a	0	LD
M00205_2.00	sox4b	-0.00440577	LD
M00205_2.00	sox5	0.198411	LD
M00205_2.00	sox6	0.0106797	LD
M00205_2.00	sox8a	0.262061	LD
M00205_2.00	sox9a	0.104654	LD
M00205_2.00	sox9b	0.0827795	LD
M00206_2.00	sox10	0.0616488	LD
M00206_2.00	sox11a	0.0465471	LD
M00206_2.00	sox11b	-0.018498	LD
M00206_2.00	sox12	0.0347375	LD
M00206_2.00	sox13	0.31565	LD
M00206_2.00	sox2	0.25836	LD
M00206_2.00	sox32	-0.0216195	LD
M00206_2.00	sox4a	0	LD
M00206_2.00	sox4b	-0.0276961	LD
M00206_2.00	sox5	0.142314	LD
M00206_2.00	sox6	0.0258747	LD
M00206_2.00	sox8a	0.252464	LD
M00206_2.00	sox9a	0.115911	LD
M00206_2.00	sox9b	0.0926038	LD
M00207_2.00	lef1	-0.00999565	LD
M00207_2.00	tcf7	0.0302763	LD
M00207_2.00	tcf7l1a	-0.0201502	LD
M00207_2.00	tcf7l1b	-0.0239031	LD
M00207_2.00	tcf7l2	0.0319525	LD
M00208_2.00	sox10	0.0217561	LD
M00208_2.00	sox11a	0.0546324	LD
M00208_2.00	sox11b	0.016627	LD
M00208_2.00	sox12	0.0593472	LD
M00208_2.00	sox13	0.146741	LD
M00208_2.00	sox2	0.141574	LD
M00208_2.00	sox32	-0.00504817	LD
M00208_2.00	sox4a	0	LD
M00208_2.00	sox4b	-0.0190781	LD
M00208_2.00	sox5	0.0840502	LD
M00208_2.00	sox6	0.010988	LD
M00208_2.00	sox8a	0.110847	LD
M00208_2.00	sox9a	0.0700557	LD
M00208_2.00	sox9b	0.0474055	LD
M00209_2.00	sox10	0.0542367	LD
M00209_2.00	sox11a	0.0592007	LD
M00209_2.00	sox11b	-0.0027967	LD
M00209_2.00	sox12	0.0338911	LD
M00209_2.00	sox13	0.302162	LD
M00209_2.00	sox2	0.256057	LD
M00209_2.00	sox32	-0.02512	LD
M00209_2.00	sox4a	0	LD
M00209_2.00	sox4b	-0.0218555	LD
M00209_2.00	sox5	0.141301	LD
M00209_2.00	sox6	0.0350235	LD
M00209_2.00	sox8a	0.230433	LD
M00209_2.00	sox9a	0.112579	LD
M00209_2.00	sox9b	0.0940761	LD
M00210_2.00	sox10	0.029279	LD
M00210_2.00	sox11a	0.0485937	LD
M00210_2.00	sox11b	-0.00244012	LD
M00210_2.00	sox12	0.0627986	LD
M00210_2.00	sox13	0.240037	LD
M00210_2.00	sox2	0.198447	LD
M00210_2.00	sox32	-0.00252434	LD
M00210_2.00	sox4a	0	LD
M00210_2.00	sox4b	-0.0191023	LD
M00210_2.00	sox5	0.140938	LD
M00210_2.00	sox6	0.0140861	LD
M00210_2.00	sox8a	0.179633	LD
M00210_2.00	sox9a	0.0831462	LD
M00210_2.00	sox9b	0.0847816	LD
M00211_2.00	sox10	0.0301949	LD
M00211_2.00	sox11a	0.0356243	LD
M00211_2.00	sox11b	-0.00577833	LD
M00211_2.00	sox12	0.0596	LD
M00211_2.00	sox13	0.196627	LD
M00211_2.00	sox2	0.156889	LD
M00211_2.00	sox32	0.000251304	LD
M00211_2.00	sox4a	0	LD
M00211_2.00	sox4b	0.00200734	LD
M00211_2.00	sox5	0.122862	LD
M00211_2.00	sox6	0.0351309	LD
M00211_2.00	sox8a	0.145506	LD
M00211_2.00	sox9a	0.0690555	LD
M00211_2.00	sox9b	0.0600514	LD
M00212_2.00	sox10	0.0394415	LD
M00212_2.00	sox11a	0.092838	LD
M00212_2.00	sox11b	0.0332908	LD
M00212_2.00	sox12	0.0188929	LD
M00212_2.00	sox13	0.276701	LD
M00212_2.00	sox2	0.248065	LD
M00212_2.00	sox32	0.00467773	LD
M00212_2.00	sox4a	0	LD
M00212_2.00	sox4b	-0.00729657	LD
M00212_2.00	sox5	0.138399	LD
M00212_2.00	sox6	0.00903345	LD
M00212_2.00	sox8a	0.19251	LD
M00212_2.00	sox9a	0.104115	LD
M00212_2.00	sox9b	0.0895804	LD
M00213_2.00	sox10	0.0943558	LD
M00213_2.00	sox11a	0.0772684	LD
M00213_2.00	sox11b	-0.02095	LD
M00213_2.00	sox12	0.0287128	LD
M00213_2.00	sox13	0.444439	LD
M00213_2.00	sox2	0.346151	LD
M00213_2.00	sox32	-0.00927284	LD
M00213_2.00	sox4a	0	LD
M00213_2.00	sox4b	-0.0115756	LD
M00213_2.00	sox5	0.21054	LD
M00213_2.00	sox6	0.0292314	LD
M00213_2.00	sox8a	0.349797	LD
M00213_2.00	sox9a	0.151468	LD
M00213_2.00	sox9b	0.0977931	LD
M00214_2.00	sox10	-0.0105692	LD
M00214_2.00	sox11a	0.0588425	LD
M00214_2.00	sox11b	-0.00581652	LD
M00214_2.00	sox12	0.0661492	LD
M00214_2.00	sox13	0.102777	LD
M00214_2.00	sox2	0.0718359	LD
M00214_2.00	sox32	-0.0185265	LD
M00214_2.00	sox4a	0	LD
M00214_2.00	sox4b	0.0623912	LD
M00214_2.00	sox5	0.0900216	LD
M00214_2.00	sox6	0.0230859	LD
M00214_2.00	sox8a	0.0679849	LD
M00214_2.00	sox9a	0.0406582	LD
M00214_2.00	sox9b	0.0377441	LD
M00215_2.00	tbr1a	0.0103461	LD
M00215_2.00	tbx21	0.00746868	LD
M00215_2.00	tbx5a	-0.0252711	LD
M00216_2.00	tbp	-0.0310253	LD
M00224_2.00	klf12a	-0.0247482	LD
M00224_2.00	klf12b	-0.00712881	LD
M00224_2.00	klf6a	0.0205736	LD
M00224_2.00	klf7a	0.0471701	LD
M00224_2.00	klf7b	0.022837	LD
M00224_2.00	klf8	0.0225721	LD
M00226_2.00	klf12a	-0.086787	LD
M00226_2.00	klf12b	-0.136222	LD
M00226_2.00	klf6a	-0.0252406	LD
M00226_2.00	klf7a	0.0499503	LD
M00226_2.00	klf7b	0.0517634	LD
M00226_2.00	klf8	0.0368546	LD
M00232_2.00	egr1	-0.0238247	LD
M00233_2.00	egr1	-0.0215434	LD
M00241_2.00	klf11b	0.0352212	LD
M00242_2.00	klf11b	0.0314564	LD
M00243_2.00	wt1a	-0.0100196	LD
M00244_2.00	wt1a	0.00704017	LD
M00245_2.00	wt1a	-0.0107631	LD
M00246_2.00	wt1a	-0.0107631	LD
M00247_2.00	wt1a	-0.0121636	LD
M00248_2.00	wt1a	-0.016438	LD
M00249_2.00	wt1a	0.116406	LD
M00253_2.00	FOXK2	-0.0247516	LD
M00253_2.00	foxg1a	-0.0292802	LD
M00253_2.00	foxg1b	-0.0179713	LD
M00253_2.00	foxi2	-0.0131449	LD
M00253_2.00	foxk2	0.0244375	LD
M00253_2.00	foxp4	-0.0654123	LD
M00254_2.00	FOXK2	-0.0936196	LD
M00254_2.00	foxg1a	0.0164128	LD
M00254_2.00	foxg1b	-0.0169206	LD
M00255_2.00	FOXK2	-0.0204878	LD
M00255_2.00	foxg1a	-0.00885473	LD
M00255_2.00	foxg1b	-0.041109	LD
M00255_2.00	foxi2	-6.27509e-05	LD
M00255_2.00	foxk2	0.0104353	LD
M00255_2.00	foxp4	-0.0327969	LD
M00256_2.00	FOXK2	-0.0135042	LD
M00256_2.00	foxg1a	-0.0327323	LD
M00256_2.00	foxg1b	0.0277129	LD
M00256_2.00	foxi2	0.0181314	LD
M00256_2.00	foxk2	0.0161173	LD
M00256_2.00	foxp4	-0.0337132	LD
M00257_2.00	FOXK2	-0.0398974	LD
M00257_2.00	foxg1a	-0.0030963	LD
M00257_2.00	foxg1b	-0.00802703	LD
M00257_2.00	foxi2	-0.00402423	LD
M00257_2.00	foxk2	0.00777368	LD
M00257_2.00	foxp4	-0.0828362	LD
M00258_2.00	FOXK2	0.0209915	LD
M00258_2.00	foxg1a	-0.00554622	LD
M00258_2.00	foxg1b	0.00984887	LD
M00258_2.00	foxi2	0.0146728	LD
M00258_2.00	foxk2	0.00491964	LD
M00258_2.00	foxp4	0.0314446	LD
M00259_2.00	FOXK2	-0.0653369	LD
M00259_2.00	foxg1a	0.00402373	LD
M00259_2.00	foxg1b	0.0200672	LD
M00259_2.00	foxi2	0.0414781	LD
M00259_2.00	foxk2	0.00264	LD
M00259_2.00	foxp4	-0.0876262	LD
M00260_2.00	alx1	-0.00788602	LD
M00260_2.00	barhl1a	0.0494343	LD
M00260_2.00	barhl2	0.0965731	LD
M00260_2.00	gbx2	-0.000901648	LD
M00260_2.00	lhx1a	0.0236689	LD
M00260_2.00	lhx2b	0.0572371	LD
M00260_2.00	lhx4	-0.0318325	LD
M00260_2.00	lhx9	0.0302318	LD
M00260_2.00	lmx1al	-0.0212741	LD
M00260_2.00	lmx1ba	0.0174832	LD
M00260_2.00	rx1	-0.0249666	LD
M00260_2.00	rx2	-0.0542154	LD
M00260_2.00	rx3	-0.030535	LD
M00260_2.00	vax1	-0.0110523	LD
M00260_2.00	vax2	0.0124247	LD
M00260_2.00	vsx1	-0.00803576	LD
M00261_2.00	alx1	0.00627922	LD
M00261_2.00	barhl1a	0.0626241	LD
M00261_2.00	barhl2	0.0984288	LD
M00261_2.00	gbx2	0.00464398	LD
M00261_2.00	lhx1a	-0.0108462	LD
M00261_2.00	lhx2b	0.0233002	LD
M00261_2.00	lhx4	-0.0225063	LD
M00261_2.00	lhx9	0.0230216	LD
M00261_2.00	lmx1al	-0.0379245	LD
M00261_2.00	lmx1ba	0.0189664	LD
M00261_2.00	rx1	-0.0262408	LD
M00261_2.00	rx2	-0.0362889	LD
M00261_2.00	rx3	-0.0332286	LD
M00261_2.00	vax1	-0.0236069	LD
M00261_2.00	vax2	-0.00763279	LD
M00261_2.00	vsx1	-0.00398763	LD
M00262_2.00	alx1	-0.00462114	LD
M00262_2.00	barhl1a	0.0141387	LD
M00262_2.00	barhl2	0.00714503	LD
M00262_2.00	gbx2	0.00187785	LD
M00262_2.00	lhx1a	0.0177502	LD
M00262_2.00	lhx2b	0.0156881	LD
M00262_2.00	lhx4	-0.0386369	LD
M00262_2.00	lhx9	0.0349065	LD
M00262_2.00	lmx1al	0.00115561	LD
M00262_2.00	lmx1ba	0.0088716	LD
M00262_2.00	rx1	-0.0234842	LD
M00262_2.00	rx2	-0.0320531	LD
M00262_2.00	rx3	0.00240365	LD
M00262_2.00	vax1	0.018466	LD
M00262_2.00	vax2	0.00168172	LD
M00262_2.00	vsx1	0.00773399	LD
M00263_2.00	alx1	-0.0170107	LD
M00263_2.00	gbx2	0.00255777	LD
M00263_2.00	lhx2b	0.00423725	LD
M00263_2.00	lhx4	-0.00753996	LD
M00263_2.00	lhx9	0.000128442	LD
M00263_2.00	rx1	-0.0606954	LD
M00263_2.00	rx2	-0.0138238	LD
M00263_2.00	rx3	-0.0176468	LD
M00263_2.00	vsx1	0.00305429	LD
M00264_2.00	alx1	-0.00445947	LD
M00264_2.00	barhl1a	0.0615376	LD
M00264_2.00	barhl2	0.104974	LD
M00264_2.00	gbx2	0.000182073	LD
M00264_2.00	lhx1a	0.000769394	LD
M00264_2.00	lhx2b	-0.0256578	LD
M00264_2.00	lhx4	-0.00926593	LD
M00264_2.00	lhx9	-0.00462449	LD
M00264_2.00	lmx1al	-0.0270807	LD
M00264_2.00	lmx1ba	0.0178775	LD
M00264_2.00	rx1	-0.057237	LD
M00264_2.00	rx2	-0.0350395	LD
M00264_2.00	rx3	-0.0187049	LD
M00264_2.00	vax1	-0.0309141	LD
M00264_2.00	vax2	-0.040205	LD
M00264_2.00	vsx1	0.0245712	LD
M00265_2.00	alx1	0.0267708	LD
M00265_2.00	rx1	0.0941227	LD
M00265_2.00	rx2	0.0391274	LD
M00265_2.00	rx3	-0.0722238	LD
M00265_2.00	vsx1	-0.0996028	LD
M00266_2.00	alx1	-0.00786973	LD
M00266_2.00	gbx2	-0.00955437	LD
M00266_2.00	isl1	0.0976283	LD
M00266_2.00	isl2a	-0.0170758	LD
M00266_2.00	isl2b	0.170195	LD
M00266_2.00	lhx1a	0.00749388	LD
M00266_2.00	lhx2b	-0.00363768	LD
M00266_2.00	lhx4	-0.0221408	LD
M00266_2.00	lhx9	-0.00381895	LD
M00266_2.00	lmx1al	-0.0338449	LD
M00266_2.00	lmx1ba	0.0225737	LD
M00266_2.00	rx1	-0.0774404	LD
M00266_2.00	rx2	-0.0606686	LD
M00266_2.00	rx3	-0.0182119	LD
M00266_2.00	vax1	-0.0325504	LD
M00266_2.00	vax2	-1.7308e-05	LD
M00266_2.00	vsx1	-0.00128175	LD
M00267_2.00	alx1	-0.002088	LD
M00267_2.00	gbx2	0.00167983	LD
M00267_2.00	lhx1a	0.00111109	LD
M00267_2.00	lhx2b	0.00839285	LD
M00267_2.00	lhx4	-0.0156757	LD
M00267_2.00	lhx9	0.00671074	LD
M00267_2.00	lmx1al	-0.0335099	LD
M00267_2.00	lmx1ba	0.0112075	LD
M00267_2.00	rx1	-0.0540872	LD
M00267_2.00	rx2	-0.0499706	LD
M00267_2.00	rx3	-0.016642	LD
M00267_2.00	vax1	-0.0225985	LD
M00267_2.00	vax2	-0.018068	LD
M00267_2.00	vsx1	0.0229401	LD
M00268_2.00	alx1	-0.0101738	LD
M00268_2.00	gbx2	-0.00723699	LD
M00268_2.00	lhx1a	0.0033833	LD
M00268_2.00	lhx2b	0.0129305	LD
M00268_2.00	lhx4	-0.020655	LD
M00268_2.00	lhx9	0.00314469	LD
M00268_2.00	lmx1al	-0.0359809	LD
M00268_2.00	lmx1ba	0.0225995	LD
M00268_2.00	rx1	-0.0667317	LD
M00268_2.00	rx2	-0.0578866	LD
M00268_2.00	rx3	-0.0265605	LD
M00268_2.00	vax1	-0.0334263	LD
M00268_2.00	vax2	-0.00807743	LD
M00268_2.00	vsx1	0.0133253	LD
M00269_2.00	alx1	-0.00786973	LD
M00269_2.00	gbx2	-0.00955437	LD
M00269_2.00	isl1	0.0976283	LD
M00269_2.00	isl2a	-0.0170758	LD
M00269_2.00	isl2b	0.170195	LD
M00269_2.00	lhx1a	0.00749388	LD
M00269_2.00	lhx2b	-0.00363768	LD
M00269_2.00	lhx4	-0.0221408	LD
M00269_2.00	lhx9	-0.00381895	LD
M00269_2.00	lmx1al	-0.0338449	LD
M00269_2.00	lmx1ba	0.0225737	LD
M00269_2.00	rx1	-0.0774404	LD
M00269_2.00	rx2	-0.0606686	LD
M00269_2.00	rx3	-0.0182119	LD
M00269_2.00	vax1	-0.0325504	LD
M00269_2.00	vax2	-1.7308e-05	LD
M00269_2.00	vsx1	-0.00128175	LD
M00270_2.00	crx	0.505362	LD
M00270_2.00	dmbx1a	0.0568074	LD
M00270_2.00	otx5	0.376403	LD
M00271_2.00	crx	0.505002	LD
M00271_2.00	dmbx1a	0.0458098	LD
M00271_2.00	otx5	0.391797	LD
M00272_2.00	crx	0.45226	LD
M00272_2.00	dmbx1a	0.0512244	LD
M00272_2.00	otx5	0.336449	LD
M00273_2.00	crx	0.493544	LD
M00273_2.00	dmbx1a	0.0494291	LD
M00273_2.00	otx5	0.374928	LD
M00274_2.00	crx	0.513948	LD
M00274_2.00	dmbx1a	0.0490153	LD
M00274_2.00	otx5	0.385628	LD
M00275_2.00	crx	0.508317	LD
M00275_2.00	dmbx1a	0.0472441	LD
M00275_2.00	otx5	0.382271	LD
M00276_2.00	pbx1a	0.0302081	LD
M00276_2.00	pbx1b	-0.00186228	LD
M00276_2.00	pbx2	0.0175948	LD
M00276_2.00	pbx3a	0.000293281	LD
M00276_2.00	pbx3b	-0.0543553	LD
M00276_2.00	pbx4	-0.0214945	LD
M00277_2.00	pbx1a	-0.00729976	LD
M00277_2.00	pbx1b	0.0531535	LD
M00277_2.00	pbx2	0.0150193	LD
M00277_2.00	pbx3a	-0.0267455	LD
M00277_2.00	pbx3b	-0.0129937	LD
M00277_2.00	pbx4	0.0200017	LD
M00278_2.00	alx1	0.00173728	LD
M00278_2.00	gbx2	0.0139654	LD
M00278_2.00	isl1	0.132221	LD
M00278_2.00	isl2a	-0.0185965	LD
M00278_2.00	isl2b	0.122118	LD
M00278_2.00	lhx1a	0.0039752	LD
M00278_2.00	lhx2b	0.0176455	LD
M00278_2.00	lhx4	0.0558413	LD
M00278_2.00	lhx9	0.00843989	LD
M00278_2.00	lmx1al	-0.00852491	LD
M00278_2.00	lmx1ba	-0.00721762	LD
M00278_2.00	rx1	-0.0585377	LD
M00278_2.00	rx2	-0.0368744	LD
M00278_2.00	rx3	-0.000568959	LD
M00278_2.00	vax1	-0.0119745	LD
M00278_2.00	vax2	-0.00662467	LD
M00278_2.00	vsx1	0.081101	LD
M00279_2.00	alx1	-0.016035	LD
M00279_2.00	gbx2	0.00624235	LD
M00279_2.00	lhx1a	0.0138028	LD
M00279_2.00	lhx2b	0.163121	LD
M00279_2.00	lhx4	-0.100813	LD
M00279_2.00	lhx9	0.0656689	LD
M00279_2.00	lmx1al	-0.0391571	LD
M00279_2.00	lmx1ba	-0.000947684	LD
M00279_2.00	rx1	0.00881077	LD
M00279_2.00	rx2	-0.0984706	LD
M00279_2.00	rx3	-0.0074998	LD
M00279_2.00	vax1	0.00769707	LD
M00279_2.00	vax2	0.105123	LD
M00279_2.00	vsx1	-0.0153582	LD
M00280_2.00	alx1	-0.0430745	LD
M00280_2.00	gbx2	0.0123274	LD
M00280_2.00	lhx1a	0.0202639	LD
M00280_2.00	lhx2b	0.0564977	LD
M00280_2.00	lhx4	-0.0741095	LD
M00280_2.00	lhx9	0.0263962	LD
M00280_2.00	lmx1al	-0.0317362	LD
M00280_2.00	lmx1ba	-0.00450209	LD
M00280_2.00	rx1	-0.0735798	LD
M00280_2.00	rx2	-0.10555	LD
M00280_2.00	rx3	0.0194708	LD
M00280_2.00	vax1	0.0113659	LD
M00280_2.00	vax2	0.042962	LD
M00280_2.00	vsx1	0.0503047	LD
M00281_2.00	alx1	-0.0312679	LD
M00281_2.00	gbx2	0.0266806	LD
M00281_2.00	lhx1a	0.00900935	LD
M00281_2.00	lhx2b	-0.0419211	LD
M00281_2.00	lhx4	0.00825158	LD
M00281_2.00	lhx9	-0.00810507	LD
M00281_2.00	lmx1al	-0.00793743	LD
M00281_2.00	lmx1ba	0.0122389	LD
M00281_2.00	rx1	-0.0703247	LD
M00281_2.00	rx2	-0.0444379	LD
M00281_2.00	rx3	-0.00281404	LD
M00281_2.00	vax1	-0.0200005	LD
M00281_2.00	vax2	-0.0418238	LD
M00281_2.00	vsx1	0.0463497	LD
M00282_2.00	alx1	0.0157503	LD
M00282_2.00	gbx2	0.00836793	LD
M00282_2.00	lhx1a	0.0014902	LD
M00282_2.00	lhx2b	0.188057	LD
M00282_2.00	lhx4	-0.0497115	LD
M00282_2.00	lhx9	0.112977	LD
M00282_2.00	lmx1al	-0.0306085	LD
M00282_2.00	lmx1ba	0.00708197	LD
M00282_2.00	rx1	0.0964732	LD
M00282_2.00	rx2	-0.0228357	LD
M00282_2.00	rx3	-0.0604129	LD
M00282_2.00	vax1	0.012746	LD
M00282_2.00	vax2	0.106692	LD
M00282_2.00	vsx1	-0.0735119	LD
M00283_2.00	alx1	0.00904272	LD
M00283_2.00	barhl1a	0.057638	LD
M00283_2.00	barhl2	0.099427	LD
M00283_2.00	gbx2	0.00779769	LD
M00283_2.00	hmx1	0.00525611	LD
M00283_2.00	hmx3a	-0.0196577	LD
M00283_2.00	hmx4	0.0118855	LD
M00283_2.00	lhx2b	0.0299149	LD
M00283_2.00	lhx4	-0.0239406	LD
M00283_2.00	lhx9	0.0269126	LD
M00283_2.00	rx1	-0.0265916	LD
M00283_2.00	rx2	-0.0342719	LD
M00283_2.00	rx3	-0.0349659	LD
M00283_2.00	vax1	-0.0185751	LD
M00283_2.00	vax2	-0.00147217	LD
M00283_2.00	vsx1	-0.00752043	LD
M00284_2.00	alx1	0.0106884	LD
M00284_2.00	barhl1a	0.0132866	LD
M00284_2.00	barhl2	0.0282592	LD
M00284_2.00	gbx2	0.00946028	LD
M00284_2.00	hmx1	0.026832	LD
M00284_2.00	hmx3a	-0.0302157	LD
M00284_2.00	hmx4	0.0324098	LD
M00284_2.00	lhx2b	0.106016	LD
M00284_2.00	lhx4	-0.044938	LD
M00284_2.00	lhx9	0.0833584	LD
M00284_2.00	rx1	0.0529822	LD
M00284_2.00	rx2	3.62258e-05	LD
M00284_2.00	rx3	-0.0499797	LD
M00284_2.00	vax1	0.0161313	LD
M00284_2.00	vax2	0.0821934	LD
M00284_2.00	vsx1	-0.055772	LD
M00285_2.00	alx1	0.00132958	LD
M00285_2.00	gbx2	-0.00387237	LD
M00285_2.00	lhx1a	0.00551677	LD
M00285_2.00	lhx2b	-0.12361	LD
M00285_2.00	lhx4	0.00445847	LD
M00285_2.00	lhx9	-0.0647757	LD
M00285_2.00	lmx1al	0.0065118	LD
M00285_2.00	lmx1ba	-0.0206871	LD
M00285_2.00	rx1	-0.073811	LD
M00285_2.00	rx2	0.0156553	LD
M00285_2.00	rx3	-0.00635352	LD
M00285_2.00	vax1	0.000200091	LD
M00285_2.00	vax2	-0.0858326	LD
M00285_2.00	vsx1	0.048749	LD
M00286_2.00	alx1	-0.00423571	LD
M00286_2.00	gbx2	0.000871664	LD
M00286_2.00	lhx1a	-0.00470208	LD
M00286_2.00	lhx2b	0.150091	LD
M00286_2.00	lhx4	-0.0536725	LD
M00286_2.00	lhx9	0.0997668	LD
M00286_2.00	lmx1al	-0.0251634	LD
M00286_2.00	lmx1ba	0.0162211	LD
M00286_2.00	rx1	0.04472	LD
M00286_2.00	rx2	-0.0443168	LD
M00286_2.00	rx3	-0.0605658	LD
M00286_2.00	vax1	0.00157491	LD
M00286_2.00	vax2	0.0978728	LD
M00286_2.00	vsx1	-0.0464782	LD
M00287_2.00	alx1	0.0164482	LD
M00287_2.00	gbx2	0.00520392	LD
M00287_2.00	lhx1a	-0.00550614	LD
M00287_2.00	lhx2b	0.132603	LD
M00287_2.00	lhx4	-0.040658	LD
M00287_2.00	lhx9	0.088893	LD
M00287_2.00	lmx1al	-0.00513278	LD
M00287_2.00	lmx1ba	-0.00131023	LD
M00287_2.00	rx1	0.0864276	LD
M00287_2.00	rx2	0.0188579	LD
M00287_2.00	rx3	-0.0669393	LD
M00287_2.00	vax1	0.00714282	LD
M00287_2.00	vax2	0.0697517	LD
M00287_2.00	vsx1	-0.0799639	LD
M00288_2.00	alx1	-0.0139322	LD
M00288_2.00	barhl1a	0.0014424	LD
M00288_2.00	barhl2	-0.0116786	LD
M00288_2.00	gbx2	-0.0107919	LD
M00288_2.00	hmx1	0.0297073	LD
M00288_2.00	hmx3a	-0.0126455	LD
M00288_2.00	hmx4	0.0145197	LD
M00288_2.00	lhx1a	-0.000170045	LD
M00288_2.00	lhx2b	0.0788753	LD
M00288_2.00	lhx4	-0.0300381	LD
M00288_2.00	lhx9	0.0280568	LD
M00288_2.00	rx1	0.0712619	LD
M00288_2.00	rx2	-0.020618	LD
M00288_2.00	rx3	-0.0597781	LD
M00288_2.00	vax1	0.00257911	LD
M00288_2.00	vax2	0.0500699	LD
M00288_2.00	vsx1	-0.0646333	LD
M00289_2.00	alx1	-0.035247	LD
M00289_2.00	barhl1a	0.0490933	LD
M00289_2.00	barhl2	0.10446	LD
M00289_2.00	gbx2	0.0014364	LD
M00289_2.00	hmx1	0.00216866	LD
M00289_2.00	hmx3a	0.0404739	LD
M00289_2.00	hmx4	-0.00680097	LD
M00289_2.00	lhx2b	0.0364076	LD
M00289_2.00	lhx4	-0.0597767	LD
M00289_2.00	lhx9	0.0321578	LD
M00289_2.00	rx1	0.0169329	LD
M00289_2.00	rx2	-0.00778192	LD
M00289_2.00	rx3	-0.0226992	LD
M00289_2.00	vax1	0.0111471	LD
M00289_2.00	vax2	0.033989	LD
M00289_2.00	vsx1	-0.0102709	LD
M00290_2.00	alx1	-0.0141206	LD
M00290_2.00	barhl1a	0.0555486	LD
M00290_2.00	barhl2	0.0863142	LD
M00290_2.00	gbx2	0.00328304	LD
M00290_2.00	hmx1	0.00802722	LD
M00290_2.00	hmx3a	-0.0276881	LD
M00290_2.00	hmx4	0.024025	LD
M00290_2.00	lhx1a	-0.00942393	LD
M00290_2.00	lhx2b	0.0805353	LD
M00290_2.00	lhx4	-0.0243438	LD
M00290_2.00	lhx9	0.0297322	LD
M00290_2.00	rx1	-0.0186423	LD
M00290_2.00	rx2	-0.0510543	LD
M00290_2.00	rx3	-0.0178964	LD
M00290_2.00	vax1	-0.00974875	LD
M00290_2.00	vax2	0.0286841	LD
M00290_2.00	vsx1	0.00825807	LD
M00291_2.00	alx1	-0.00350032	LD
M00291_2.00	gbx2	0.0125985	LD
M00291_2.00	lhx2b	0.0919717	LD
M00291_2.00	lhx4	-0.0190854	LD
M00291_2.00	lhx9	0.0494322	LD
M00291_2.00	rx1	0.0206446	LD
M00291_2.00	rx2	-0.0281192	LD
M00291_2.00	rx3	-0.0143267	LD
M00291_2.00	vsx1	0.0189129	LD
M00292_2.00	alx1	-0.00350032	LD
M00292_2.00	barhl1a	0.0144454	LD
M00292_2.00	barhl2	0.053414	LD
M00292_2.00	gbx2	0.0125985	LD
M00292_2.00	lhx1a	0.00527239	LD
M00292_2.00	lhx2b	0.0919717	LD
M00292_2.00	lhx4	-0.0190854	LD
M00292_2.00	lhx9	0.0494322	LD
M00292_2.00	lmx1al	-0.00575694	LD
M00292_2.00	lmx1ba	0.00877053	LD
M00292_2.00	rx1	0.0206446	LD
M00292_2.00	rx2	-0.0281192	LD
M00292_2.00	rx3	-0.0143267	LD
M00292_2.00	vax1	0.0118004	LD
M00292_2.00	vax2	0.0428308	LD
M00292_2.00	vsx1	0.0189129	LD
M00293_2.00	hoxa13a	0.00708685	LD
M00294_2.00	hoxa13a	0.0108377	LD
M00295_2.00	hoxa13a	0.0203343	LD
M00296_2.00	hoxa13a	-0.00758196	LD
M00297_2.00	hoxa13a	-0.000791064	LD
M00298_2.00	hoxa13a	0.0197076	LD
M00299_2.00	hoxa13a	0.0198497	LD
M00300_2.00	hoxa13a	0.0161077	LD
M00303_2.00	gbx2	0.00540312	LD
M00303_2.00	hmx1	0.0277336	LD
M00303_2.00	hmx3a	-0.00989828	LD
M00304_2.00	gbx2	0.0134325	LD
M00304_2.00	hmx1	-0.0606187	LD
M00304_2.00	hmx3a	0.0340768	LD
M00305_2.00	gbx2	0.0261892	LD
M00305_2.00	hmx1	0.0409894	LD
M00305_2.00	hmx3a	-0.0479819	LD
M00306_2.00	alx1	-0.0141206	LD
M00306_2.00	gbx2	0.00328304	LD
M00306_2.00	hmx4	0.024025	LD
M00306_2.00	lhx2b	0.0805353	LD
M00306_2.00	lhx4	-0.0243438	LD
M00306_2.00	lhx9	0.0297322	LD
M00306_2.00	lmx1al	-0.0297046	LD
M00306_2.00	lmx1ba	0.00153498	LD
M00306_2.00	rx1	-0.0186423	LD
M00306_2.00	rx2	-0.0510543	LD
M00306_2.00	rx3	-0.0178964	LD
M00306_2.00	vsx1	0.00825807	LD
M00307_2.00	alx1	-0.0141206	LD
M00307_2.00	gbx2	0.00328304	LD
M00307_2.00	hmx4	0.024025	LD
M00307_2.00	lhx2b	0.0805353	LD
M00307_2.00	lhx4	-0.0243438	LD
M00307_2.00	lhx9	0.0297322	LD
M00307_2.00	lmx1al	-0.0297046	LD
M00307_2.00	lmx1ba	0.00153498	LD
M00307_2.00	rx1	-0.0186423	LD
M00307_2.00	rx2	-0.0510543	LD
M00307_2.00	rx3	-0.0178964	LD
M00307_2.00	vsx1	0.00825807	LD
M00308_2.00	alx1	0.0202461	LD
M00308_2.00	gbx2	0.0224976	LD
M00308_2.00	hmx4	-0.0802097	LD
M00308_2.00	lhx2b	-0.195327	LD
M00308_2.00	lhx4	0.0715787	LD
M00308_2.00	lhx9	-0.0956277	LD
M00308_2.00	lmx1al	-0.0101721	LD
M00308_2.00	lmx1ba	0.00154916	LD
M00308_2.00	rx1	-0.142241	LD
M00308_2.00	rx2	0.0384102	LD
M00308_2.00	rx3	0.0218681	LD
M00308_2.00	vsx1	0.0473808	LD
M00309_2.00	alx1	0.0068097	LD
M00309_2.00	gbx2	0.00633631	LD
M00309_2.00	hmx4	0.0725266	LD
M00309_2.00	lhx2b	0.207801	LD
M00309_2.00	lhx4	-0.0737218	LD
M00309_2.00	lhx9	0.129129	LD
M00309_2.00	lmx1al	-0.0233546	LD
M00309_2.00	lmx1ba	0.00348703	LD
M00309_2.00	rx1	0.103506	LD
M00309_2.00	rx2	-0.0297322	LD
M00309_2.00	rx3	-0.0681963	LD
M00309_2.00	vsx1	-0.0984378	LD
M00310_2.00	crx	0.50534	LD
M00310_2.00	dmbx1a	0.0625212	LD
M00310_2.00	otx5	0.366327	LD
M00311_2.00	crx	0.50534	LD
M00311_2.00	dmbx1a	0.0625212	LD
M00311_2.00	otx5	0.366327	LD
M00312_2.00	crx	-0.0114602	LD
M00312_2.00	dmbx1a	-0.0194252	LD
M00312_2.00	otx5	-0.0445395	LD
M00313_2.00	crx	0.480523	LD
M00313_2.00	dmbx1a	0.058444	LD
M00313_2.00	otx5	0.356379	LD
M00314_2.00	crx	0.50534	LD
M00314_2.00	dmbx1a	0.0625212	LD
M00314_2.00	otx5	0.366327	LD
M00315_2.00	alx1	-0.0141206	LD
M00315_2.00	gbx2	0.00328304	LD
M00315_2.00	lhx1a	-0.00942393	LD
M00315_2.00	lhx2b	0.0805353	LD
M00315_2.00	lhx4	-0.0243438	LD
M00315_2.00	lhx9	0.0297322	LD
M00315_2.00	lmx1al	-0.0297046	LD
M00315_2.00	lmx1ba	0.00153498	LD
M00315_2.00	rx1	-0.0186423	LD
M00315_2.00	rx2	-0.0510543	LD
M00315_2.00	rx3	-0.0178964	LD
M00315_2.00	vax1	-0.00974875	LD
M00315_2.00	vax2	0.0286841	LD
M00315_2.00	vsx1	0.00825807	LD
M00316_2.00	alx1	0.0267708	LD
M00316_2.00	gbx2	0.00978985	LD
M00316_2.00	lhx1a	-0.00376763	LD
M00316_2.00	lhx2b	0.138285	LD
M00316_2.00	lhx4	-0.0305271	LD
M00316_2.00	lhx9	0.104509	LD
M00316_2.00	lmx1al	0.00208679	LD
M00316_2.00	lmx1ba	0.00151683	LD
M00316_2.00	rx1	0.0941227	LD
M00316_2.00	rx2	0.0391274	LD
M00316_2.00	rx3	-0.0722238	LD
M00316_2.00	vax1	0.0146157	LD
M00316_2.00	vax2	0.0900685	LD
M00316_2.00	vsx1	-0.0996028	LD
M00317_2.00	alx1	-0.000788311	LD
M00317_2.00	gbx2	0.0124028	LD
M00317_2.00	lhx1a	0.00370642	LD
M00317_2.00	lhx2b	0.00711452	LD
M00317_2.00	lhx4	0.0248296	LD
M00317_2.00	lhx9	0.0335025	LD
M00317_2.00	lmx1al	0.0287374	LD
M00317_2.00	lmx1ba	0.0251856	LD
M00317_2.00	rx1	-0.0121408	LD
M00317_2.00	rx2	0.108557	LD
M00317_2.00	rx3	-0.0298029	LD
M00317_2.00	vax1	-0.000667366	LD
M00317_2.00	vax2	0.024241	LD
M00317_2.00	vsx1	-0.0489432	LD
M00318_2.00	alx1	-0.00513644	LD
M00318_2.00	gbx2	0.00965179	LD
M00318_2.00	lhx2b	0.119137	LD
M00318_2.00	lhx4	-0.0634648	LD
M00318_2.00	lhx9	0.0717672	LD
M00318_2.00	lmx1al	-0.0279487	LD
M00318_2.00	lmx1ba	0.015215	LD
M00318_2.00	rx1	0.01857	LD
M00318_2.00	rx2	-0.0519893	LD
M00318_2.00	rx3	-0.0540809	LD
M00318_2.00	vax1	0.00495692	LD
M00318_2.00	vax2	0.0819897	LD
M00318_2.00	vsx1	-0.0596051	LD
M00319_2.00	alx1	0.0267708	LD
M00319_2.00	gbx2	0.00978985	LD
M00319_2.00	lhx1a	-0.00376763	LD
M00319_2.00	lhx2b	0.138285	LD
M00319_2.00	lhx4	-0.0305271	LD
M00319_2.00	lhx9	0.104509	LD
M00319_2.00	lmx1al	0.00208679	LD
M00319_2.00	lmx1ba	0.00151683	LD
M00319_2.00	rx1	0.0941227	LD
M00319_2.00	rx2	0.0391274	LD
M00319_2.00	rx3	-0.0722238	LD
M00319_2.00	vax1	0.0146157	LD
M00319_2.00	vax2	0.0900685	LD
M00319_2.00	vsx1	-0.0996028	LD
M00325_2.00	six3a	-0.0328629	LD
M00325_2.00	six3b	-0.0897314	LD
M00325_2.00	six6a	0.0190229	LD
M00325_2.00	six6b	-0.0409398	LD
M00325_2.00	six7	0.00471709	LD
M00326_2.00	six3a	-0.0196049	LD
M00326_2.00	six3b	-0.0571154	LD
M00326_2.00	six6a	0.000555127	LD
M00326_2.00	six6b	-0.0151265	LD
M00326_2.00	six7	0.00332824	LD
M00327_2.00	six3a	-0.000560698	LD
M00327_2.00	six3b	-0.0083604	LD
M00327_2.00	six6a	0.024439	LD
M00327_2.00	six6b	-0.0108698	LD
M00327_2.00	six7	0.0302426	LD
M00328_2.00	gbx2	-0.00115681	LD
M00328_2.00	hmx1	-0.0114656	LD
M00328_2.00	hmx3a	-0.0105979	LD
M00328_2.00	hmx4	0.0173053	LD
M00328_2.00	vax1	-0.0169406	LD
M00328_2.00	vax2	0.0343338	LD
M00329_2.00	gbx2	0.0015509	LD
M00329_2.00	hmx1	0.0146019	LD
M00329_2.00	hmx3a	-0.0231469	LD
M00329_2.00	hmx4	0.0166686	LD
M00329_2.00	vax1	-0.015731	LD
M00329_2.00	vax2	0.00988177	LD
M00330_2.00	gbx2	-0.00115681	LD
M00330_2.00	hmx1	-0.0114656	LD
M00330_2.00	hmx3a	-0.0105979	LD
M00330_2.00	hmx4	0.0173053	LD
M00330_2.00	vax1	-0.0169406	LD
M00330_2.00	vax2	0.0343338	LD
M00335_2.00	pax6a	-0.18471	LD
M00335_2.00	pax6b	-0.199174	LD
M00336_2.00	pax6a	0.00617186	LD
M00336_2.00	pax6b	0.00510317	LD
M00337_2.00	pax6a	0.0871189	LD
M00337_2.00	pax6b	0.0698699	LD
M00338_2.00	pax6a	0.20571	LD
M00338_2.00	pax6b	0.223899	LD
M00339_2.00	pax6a	-0.0720626	LD
M00339_2.00	pax6b	-0.0948692	LD
M00340_2.00	pax6a	0.151413	LD
M00340_2.00	pax6b	0.119668	LD
M00341_2.00	pax6a	0.119152	LD
M00341_2.00	pax6b	0.133183	LD
M00342_2.00	pax6a	0.0877431	LD
M00342_2.00	pax6b	0.10458	LD
M00343_2.00	pax6a	-0.197102	LD
M00343_2.00	pax6b	-0.238486	LD
M00344_2.00	pax6a	-0.246664	LD
M00344_2.00	pax6b	-0.26542	LD
M00345_2.00	pax2a	0.0471612	LD
M00345_2.00	pax6a	0	LD
M00345_2.00	pax6b	0.150097	LD
M00346_2.00	pax2a	0.0641726	LD
M00346_2.00	pax6a	0.253026	LD
M00346_2.00	pax6b	0.259326	LD
M00352_2.00	pax7a	0.0179833	LD
M00353_2.00	pax7a	-0.00559986	LD
M00354_2.00	pax7a	0.00967006	LD
M00355_2.00	pax7a	0.0059733	LD
M00356_2.00	pax7a	-0.00298183	LD
M00357_2.00	pax7a	0.00196177	LD
M00358_2.00	pax7a	-0.00463998	LD
M00359_2.00	pax7a	0.0179036	LD
M00367_2.00	nr1h3	0.0328195	LD
M00367_2.00	nr2c1	-0.0175858	LD
M00367_2.00	nr2c2	-0.0180935	LD
M00367_2.00	nr2f1a	-0.000155147	LD
M00367_2.00	nr2f1b	-0.00324531	LD
M00367_2.00	nr2f5	-0.0346205	LD
M00367_2.00	nr2f6a	-0.00551241	LD
M00367_2.00	nr2f6b	-0.00371604	LD
M00367_2.00	nr6a1b	0.00911275	LD
M00367_2.00	raraa	0.00418127	LD
M00367_2.00	rarab	-0.00481345	LD
M00367_2.00	rarga	-0.0559154	LD
M00367_2.00	roraa	0.101609	LD
M00367_2.00	rorab	0.077017	LD
M00367_2.00	rorb	0.0209367	LD
M00367_2.00	rorc	0.0153758	LD
M00367_2.00	rorca	-0.0364539	LD
M00367_2.00	rorcb	0.000633856	LD
M00367_2.00	rxraa	-0.016307	LD
M00367_2.00	rxrab	-0.021366	LD
M00367_2.00	rxrba	0.014543	LD
M00367_2.00	rxrgb	-0.000655718	LD
M00368_2.00	nr1h3	0.00835767	LD
M00368_2.00	nr2c1	0.0302846	LD
M00368_2.00	nr2c2	0.0217664	LD
M00368_2.00	nr2f1a	-0.00630408	LD
M00368_2.00	nr2f1b	0.0144122	LD
M00368_2.00	nr2f5	0.0762281	LD
M00368_2.00	nr2f6a	0.0400124	LD
M00368_2.00	nr2f6b	-0.0215351	LD
M00368_2.00	nr6a1b	0.00413172	LD
M00368_2.00	raraa	-0.117531	LD
M00368_2.00	rarab	-0.0615135	LD
M00368_2.00	rarga	0.0499456	LD
M00368_2.00	roraa	-0.068426	LD
M00368_2.00	rorab	-0.0771168	LD
M00368_2.00	rorb	0.106802	LD
M00368_2.00	rorc	-0.0205108	LD
M00368_2.00	rorca	0.0575454	LD
M00368_2.00	rorcb	0.0869089	LD
M00368_2.00	rxraa	0.0261729	LD
M00368_2.00	rxrab	0.00765455	LD
M00368_2.00	rxrba	0.0183622	LD
M00368_2.00	rxrgb	0.038196	LD
M00369_2.00	nr2e3	0.126872	LD
M00370_2.00	nr2e3	0.0343675	LD
M00371_2.00	nr2e3	0.0384809	LD
M00372_2.00	nr2e3	-0.0539927	LD
M00373_2.00	nr2e3	0.00534099	LD
M00375_2.00	egr1	-0.0157414	LD
M00376_2.00	hoxa13a	-0.00251124	LD
M00377_2.00	pou2f1b	0.05358	LD
M00380_2.00	alx1	0.0267708	LD
M00380_2.00	gbx2	0.00978985	LD
M00380_2.00	lhx1a	-0.00376763	LD
M00380_2.00	lhx2b	0.138285	LD
M00380_2.00	lhx4	-0.0305271	LD
M00380_2.00	lhx9	0.104509	LD
M00380_2.00	lmx1al	0.00208679	LD
M00380_2.00	lmx1ba	0.00151683	LD
M00380_2.00	rx1	0.0941227	LD
M00380_2.00	rx2	0.0391274	LD
M00380_2.00	rx3	-0.0722238	LD
M00380_2.00	vax1	0.0146157	LD
M00380_2.00	vax2	0.0900685	LD
M00380_2.00	vsx1	-0.0996028	LD
M00381_2.00	hoxc10a	-0.00277336	LD
M00382_2.00	hoxc10a	-0.00593756	LD
M00383_2.00	gbx2	0.000182073	LD
M00383_2.00	hmx1	-0.0142433	LD
M00383_2.00	hmx3a	-0.00936997	LD
M00383_2.00	hmx4	-0.000504968	LD
M00383_2.00	vax1	-0.0309141	LD
M00383_2.00	vax2	-0.040205	LD
M00384_2.00	alx1	0.00984213	LD
M00384_2.00	barhl1a	0.051934	LD
M00384_2.00	barhl2	0.0735462	LD
M00384_2.00	gbx2	-0.00515358	LD
M00384_2.00	hmx1	0.0280033	LD
M00384_2.00	hmx3a	-0.0111509	LD
M00384_2.00	hmx4	0.0349951	LD
M00384_2.00	lhx1a	0.000136214	LD
M00384_2.00	rx1	-0.00491702	LD
M00384_2.00	rx2	-0.0639094	LD
M00384_2.00	rx3	-0.0417785	LD
M00384_2.00	vax1	-0.00597808	LD
M00384_2.00	vax2	0.0409276	LD
M00384_2.00	vsx1	-0.026566	LD
M00386_2.00	irx2a	0.0326085	LD
M00386_2.00	irx4b	0.0189541	LD
M00386_2.00	irx5a	0.0967781	LD
M00386_2.00	irx6a	0.0365172	LD
M00387_2.00	alx1	0.0030721	LD
M00387_2.00	barhl1a	0.0503533	LD
M00387_2.00	barhl2	0.0760043	LD
M00387_2.00	gbx2	-0.000226445	LD
M00387_2.00	hmx4	0.0421088	LD
M00387_2.00	lhx1a	0.0177941	LD
M00387_2.00	vax1	-0.00412052	LD
M00387_2.00	vax2	0.0453989	LD
M00387_2.00	vsx1	0.00374078	LD
M00388_2.00	alx1	-0.0156018	LD
M00388_2.00	barhl1a	0.0575925	LD
M00388_2.00	barhl2	0.102308	LD
M00388_2.00	gbx2	0.016348	LD
M00388_2.00	hmx1	-0.00944228	LD
M00388_2.00	hmx3a	-0.0208921	LD
M00388_2.00	hmx4	0.0089765	LD
M00388_2.00	lhx1a	0.00992275	LD
M00388_2.00	lhx4	-0.0479999	LD
M00388_2.00	rx1	-0.0132002	LD
M00388_2.00	rx2	-0.0573958	LD
M00388_2.00	rx3	-0.010955	LD
M00388_2.00	vax1	-0.0419668	LD
M00388_2.00	vax2	-0.00190204	LD
M00388_2.00	vsx1	0.0199964	LD
M00389_2.00	hoxa13a	0.011944	LD
M00390_2.00	hoxc10a	0.00692744	LD
M00391_2.00	hoxc10a	0.0062398	LD
M00392_2.00	hoxc10a	-0.000433077	LD
M00393_2.00	alx1	0.0151758	LD
M00393_2.00	barhl1a	0.0119182	LD
M00393_2.00	barhl2	-0.0120786	LD
M00393_2.00	gbx2	0.00324503	LD
M00393_2.00	hmx4	0.0223857	LD
M00393_2.00	rx1	0.0905565	LD
M00393_2.00	rx2	0.0265298	LD
M00393_2.00	rx3	-0.0831193	LD
M00393_2.00	vax1	0.00934849	LD
M00393_2.00	vax2	0.0636476	LD
M00393_2.00	vsx1	-0.126891	LD
M00394_2.00	hoxa13a	0.00932709	LD
M00395_2.00	alx1	-0.00383028	LD
M00395_2.00	barhl1a	0.0565421	LD
M00395_2.00	barhl2	0.0922734	LD
M00395_2.00	gbx2	0.000190569	LD
M00395_2.00	hmx4	0.0132241	LD
M00395_2.00	rx1	-0.0233204	LD
M00395_2.00	rx2	-0.0411402	LD
M00395_2.00	rx3	-0.0314426	LD
M00395_2.00	vax1	-0.0237854	LD
M00395_2.00	vax2	-0.00757735	LD
M00395_2.00	vsx1	0.00439236	LD
M00396_2.00	crx	0.50534	LD
M00396_2.00	dmbx1a	0.0625212	LD
M00396_2.00	otx5	0.366327	LD
M00398_2.00	alx1	-0.00383028	LD
M00398_2.00	barhl1a	0.0565421	LD
M00398_2.00	barhl2	0.0922734	LD
M00398_2.00	gbx2	0.000190569	LD
M00398_2.00	hmx1	0.0079416	LD
M00398_2.00	hmx3a	-0.0249299	LD
M00398_2.00	hmx4	0.0132241	LD
M00398_2.00	lhx2b	0.0340029	LD
M00398_2.00	lhx4	-0.033677	LD
M00398_2.00	lhx9	0.0228481	LD
M00398_2.00	rx1	-0.0233204	LD
M00398_2.00	rx2	-0.0411402	LD
M00398_2.00	rx3	-0.0314426	LD
M00398_2.00	vax1	-0.0237854	LD
M00398_2.00	vax2	-0.00757735	LD
M00398_2.00	vsx1	0.00439236	LD
M00399_2.00	meis1b	-0.0314273	LD
M00399_2.00	meis2a	0	LD
M00399_2.00	meis3	-0.0119306	LD
M00399_2.00	pknox1.1	0.0247764	LD
M00399_2.00	pknox1.2	-0.000306904	LD
M00399_2.00	pknox2	0.0183176	LD
M00399_2.00	tgif1	0.016792	LD
M00400_2.00	alx1	-0.0141206	LD
M00400_2.00	gbx2	0.00328304	LD
M00400_2.00	lhx1a	-0.00942393	LD
M00400_2.00	lhx2b	0.0805353	LD
M00400_2.00	lhx4	-0.0243438	LD
M00400_2.00	lhx9	0.0297322	LD
M00400_2.00	lmx1al	-0.0297046	LD
M00400_2.00	lmx1ba	0.00153498	LD
M00400_2.00	rx1	-0.0186423	LD
M00400_2.00	rx2	-0.0510543	LD
M00400_2.00	rx3	-0.0178964	LD
M00400_2.00	vax1	-0.00974875	LD
M00400_2.00	vax2	0.0286841	LD
M00400_2.00	vsx1	0.00825807	LD
M00401_2.00	alx1	-0.0141206	LD
M00401_2.00	gbx2	0.00328304	LD
M00401_2.00	lhx1a	-0.00942393	LD
M00401_2.00	lhx2b	0.0805353	LD
M00401_2.00	lhx4	-0.0243438	LD
M00401_2.00	lhx9	0.0297322	LD
M00401_2.00	lmx1al	-0.0297046	LD
M00401_2.00	lmx1ba	0.00153498	LD
M00401_2.00	rx1	-0.0186423	LD
M00401_2.00	rx2	-0.0510543	LD
M00401_2.00	rx3	-0.0178964	LD
M00401_2.00	vax1	-0.00974875	LD
M00401_2.00	vax2	0.0286841	LD
M00401_2.00	vsx1	0.00825807	LD
M00402_2.00	alx1	-0.00423571	LD
M00402_2.00	gbx2	0.000871664	LD
M00402_2.00	lhx1a	-0.00470208	LD
M00402_2.00	lhx2b	0.150091	LD
M00402_2.00	lhx4	-0.0536725	LD
M00402_2.00	lhx9	0.0997668	LD
M00402_2.00	lmx1al	-0.0251634	LD
M00402_2.00	lmx1ba	0.0162211	LD
M00402_2.00	rx1	0.04472	LD
M00402_2.00	rx2	-0.0443168	LD
M00402_2.00	rx3	-0.0605658	LD
M00402_2.00	vax1	0.00157491	LD
M00402_2.00	vax2	0.0978728	LD
M00402_2.00	vsx1	-0.0464782	LD
M00403_2.00	alx1	0.00155564	LD
M00403_2.00	barhl1a	0.0472881	LD
M00403_2.00	barhl2	0.0797174	LD
M00403_2.00	gbx2	-0.000697219	LD
M00403_2.00	lhx1a	-0.0100347	LD
M00403_2.00	lhx4	-0.0576268	LD
M00403_2.00	rx1	0.00551199	LD
M00403_2.00	rx2	-0.0645498	LD
M00403_2.00	rx3	-0.0418164	LD
M00403_2.00	vax1	-0.0145784	LD
M00403_2.00	vax2	0.0373383	LD
M00403_2.00	vsx1	-0.0105562	LD
M00405_2.00	alx1	-0.0091944	LD
M00405_2.00	lhx1a	-0.00821109	LD
M00405_2.00	lhx2b	0.0491062	LD
M00405_2.00	lhx4	0.00864018	LD
M00405_2.00	lhx9	0.0244319	LD
M00405_2.00	rx1	-0.015189	LD
M00405_2.00	rx2	-0.0497622	LD
M00405_2.00	rx3	-0.0254948	LD
M00405_2.00	vsx1	0.0132136	LD
M00406_2.00	alx1	0.0267708	LD
M00406_2.00	gbx2	0.00978985	LD
M00406_2.00	lhx1a	-0.00376763	LD
M00406_2.00	lhx2b	0.138285	LD
M00406_2.00	lhx4	-0.0305271	LD
M00406_2.00	lhx9	0.104509	LD
M00406_2.00	lmx1al	0.00208679	LD
M00406_2.00	lmx1ba	0.00151683	LD
M00406_2.00	rx1	0.0941227	LD
M00406_2.00	rx2	0.0391274	LD
M00406_2.00	rx3	-0.0722238	LD
M00406_2.00	vax1	0.0146157	LD
M00406_2.00	vax2	0.0900685	LD
M00406_2.00	vsx1	-0.0996028	LD
M00407_2.00	meis1b	-0.0393616	LD
M00407_2.00	meis2a	0	LD
M00407_2.00	meis3	-0.0263437	LD
M00407_2.00	pknox1.1	0.0212683	LD
M00407_2.00	pknox1.2	0.020121	LD
M00407_2.00	pknox2	0.00812788	LD
M00407_2.00	tgif1	0.0190967	LD
M00408_2.00	hmbox1a	-0.0155202	LD
M00408_2.00	zgc:91944	0.00828737	LD
M00409_2.00	barhl1a	0.0141387	LD
M00409_2.00	barhl2	0.00714503	LD
M00409_2.00	gbx2	0.00187785	LD
M00409_2.00	lhx1a	0.0177502	LD
M00409_2.00	vax1	0.018466	LD
M00409_2.00	vax2	0.00168172	LD
M00410_2.00	hoxc10a	-0.00295428	LD
M00411_2.00	crx	0.483104	LD
M00411_2.00	dmbx1a	0.0508481	LD
M00411_2.00	otx5	0.372261	LD
M00412_2.00	six3a	-0.0068192	LD
M00412_2.00	six3b	-0.0635167	LD
M00412_2.00	six6a	0.0212902	LD
M00412_2.00	six6b	-0.0344734	LD
M00412_2.00	six7	0.00517546	LD
M00413_2.00	alx1	0.0174627	LD
M00413_2.00	barhl1a	0.0323592	LD
M00413_2.00	barhl2	0.048766	LD
M00413_2.00	gbx2	-0.0230301	LD
M00413_2.00	rx1	0.0720565	LD
M00413_2.00	rx2	-0.0596199	LD
M00413_2.00	rx3	-0.033317	LD
M00413_2.00	vax1	0.0181757	LD
M00413_2.00	vax2	0.111292	LD
M00413_2.00	vsx1	-0.0313291	LD
M00414_2.00	alx1	0.011797	LD
M00414_2.00	barhl1a	-0.00193223	LD
M00414_2.00	barhl2	-0.038548	LD
M00414_2.00	gbx2	0.00085564	LD
M00414_2.00	hmx1	0.0517825	LD
M00414_2.00	hmx3a	-0.0406221	LD
M00414_2.00	hmx4	0.115878	LD
M00414_2.00	lhx1a	0.0177739	LD
M00414_2.00	lhx2b	0.27987	LD
M00414_2.00	lhx4	-0.105961	LD
M00414_2.00	lhx9	0.158545	LD
M00414_2.00	rx1	0.136816	LD
M00414_2.00	rx2	-0.045727	LD
M00414_2.00	rx3	-0.0596256	LD
M00414_2.00	vax1	0.025269	LD
M00414_2.00	vax2	0.170982	LD
M00414_2.00	vsx1	-0.0835972	LD
M00415_2.00	crx	0.485409	LD
M00415_2.00	dmbx1a	0.0507894	LD
M00415_2.00	otx5	0.358325	LD
M00416_2.00	irx2a	-0.0238089	LD
M00416_2.00	irx4b	-0.02981	LD
M00416_2.00	irx5a	0.0293489	LD
M00416_2.00	irx6a	0.0129002	LD
M00417_2.00	alx1	-0.0141206	LD
M00417_2.00	gbx2	0.00328304	LD
M00417_2.00	lhx2b	0.0805353	LD
M00417_2.00	lhx4	-0.0243438	LD
M00417_2.00	lhx9	0.0297322	LD
M00417_2.00	lmx1al	-0.0297046	LD
M00417_2.00	lmx1ba	0.00153498	LD
M00417_2.00	rx1	-0.0186423	LD
M00417_2.00	rx2	-0.0510543	LD
M00417_2.00	rx3	-0.0178964	LD
M00417_2.00	vax1	-0.00974875	LD
M00417_2.00	vax2	0.0286841	LD
M00417_2.00	vsx1	0.00825807	LD
M00418_2.00	crx	0.50534	LD
M00418_2.00	dmbx1a	0.0625212	LD
M00418_2.00	otx5	0.366327	LD
M00419_2.00	hmbox1a	0.0148587	LD
M00419_2.00	zgc:91944	-0.00932641	LD
M00421_2.00	hoxc10a	0.00686812	LD
M00422_2.00	gbx2	0.000871664	LD
M00422_2.00	hmx1	0.0256345	LD
M00422_2.00	hmx3a	-0.0446843	LD
M00422_2.00	hmx4	0.0520312	LD
M00422_2.00	vax1	0.00157491	LD
M00422_2.00	vax2	0.0978728	LD
M00423_2.00	alx1	0.00751543	LD
M00423_2.00	barhl1a	0.00895076	LD
M00423_2.00	barhl2	0.00931095	LD
M00423_2.00	gbx2	-0.0165379	LD
M00423_2.00	hmx1	0.00380536	LD
M00423_2.00	hmx3a	0.0125569	LD
M00423_2.00	hmx4	0.060684	LD
M00423_2.00	lhx1a	0.0268645	LD
M00423_2.00	vax1	0.0146036	LD
M00423_2.00	vax2	0.0561603	LD
M00423_2.00	vsx1	0.00113272	LD
M00424_2.00	alx1	-0.0141206	LD
M00424_2.00	gbx2	0.00328304	LD
M00424_2.00	rx1	-0.0186423	LD
M00424_2.00	rx2	-0.0510543	LD
M00424_2.00	rx3	-0.0178964	LD
M00424_2.00	vsx1	0.00825807	LD
M00426_2.00	alx1	-0.00298919	LD
M00426_2.00	barhl1a	0.0262379	LD
M00426_2.00	barhl2	0.0553122	LD
M00426_2.00	gbx2	0.0128771	LD
M00426_2.00	lhx1a	-0.0117942	LD
M00426_2.00	lhx2b	0.117426	LD
M00426_2.00	lhx4	-0.0190825	LD
M00426_2.00	lhx9	0.0619513	LD
M00426_2.00	lmx1al	-0.0153666	LD
M00426_2.00	lmx1ba	0.00364791	LD
M00426_2.00	rx1	0.0422239	LD
M00426_2.00	rx2	-0.00812503	LD
M00426_2.00	rx3	-0.0486216	LD
M00426_2.00	vax1	0.00950606	LD
M00426_2.00	vax2	0.0446644	LD
M00426_2.00	vsx1	-0.0259121	LD
M00428_2.00	crx	0.50534	LD
M00428_2.00	dmbx1a	0.0625212	LD
M00428_2.00	otx5	0.366327	LD
M00429_2.00	alx1	-0.0141206	LD
M00429_2.00	barhl1a	0.0555486	LD
M00429_2.00	barhl2	0.0863142	LD
M00429_2.00	gbx2	0.00328304	LD
M00429_2.00	hmx1	0.00802722	LD
M00429_2.00	hmx3a	-0.0276881	LD
M00429_2.00	hmx4	0.024025	LD
M00429_2.00	lhx1a	-0.00942393	LD
M00429_2.00	lhx2b	0.0805353	LD
M00429_2.00	lhx4	-0.0243438	LD
M00429_2.00	lhx9	0.0297322	LD
M00429_2.00	rx1	-0.0186423	LD
M00429_2.00	rx2	-0.0510543	LD
M00429_2.00	rx3	-0.0178964	LD
M00429_2.00	vax1	-0.00974875	LD
M00429_2.00	vax2	0.0286841	LD
M00429_2.00	vsx1	0.00825807	LD
M00430_2.00	alx1	-0.00423571	LD
M00430_2.00	gbx2	0.000871664	LD
M00430_2.00	lhx1a	-0.00470208	LD
M00430_2.00	lhx2b	0.150091	LD
M00430_2.00	lhx4	-0.0536725	LD
M00430_2.00	lhx9	0.0997668	LD
M00430_2.00	lmx1al	-0.0251634	LD
M00430_2.00	lmx1ba	0.0162211	LD
M00430_2.00	rx1	0.04472	LD
M00430_2.00	rx2	-0.0443168	LD
M00430_2.00	rx3	-0.0605658	LD
M00430_2.00	vax1	0.00157491	LD
M00430_2.00	vax2	0.0978728	LD
M00430_2.00	vsx1	-0.0464782	LD
M00431_2.00	alx1	-0.0141206	LD
M00431_2.00	gbx2	0.00328304	LD
M00431_2.00	lhx1a	-0.00942393	LD
M00431_2.00	lhx2b	0.0805353	LD
M00431_2.00	lhx4	-0.0243438	LD
M00431_2.00	lhx9	0.0297322	LD
M00431_2.00	lmx1al	-0.0297046	LD
M00431_2.00	lmx1ba	0.00153498	LD
M00431_2.00	rx1	-0.0186423	LD
M00431_2.00	rx2	-0.0510543	LD
M00431_2.00	rx3	-0.0178964	LD
M00431_2.00	vax1	-0.00974875	LD
M00431_2.00	vax2	0.0286841	LD
M00431_2.00	vsx1	0.00825807	LD
M00432_2.00	alx1	0.00113018	LD
M00432_2.00	lhx2b	0.0418392	LD
M00432_2.00	lhx4	0.0421659	LD
M00432_2.00	lhx9	0.0405013	LD
M00432_2.00	lmx1al	0.0114002	LD
M00432_2.00	lmx1ba	0.0124669	LD
M00432_2.00	rx1	0.0108855	LD
M00432_2.00	rx2	0.0223847	LD
M00432_2.00	rx3	-0.0221693	LD
M00432_2.00	vsx1	0.0206924	LD
M00433_2.00	barhl1a	0.00182397	LD
M00433_2.00	barhl2	0.0210262	LD
M00433_2.00	gbx2	-0.0273397	LD
M00433_2.00	hmx1	0.0433637	LD
M00433_2.00	hmx3a	0.00339324	LD
M00433_2.00	rx1	0.0810418	LD
M00433_2.00	rx2	-0.0322641	LD
M00433_2.00	rx3	-0.042529	LD
M00433_2.00	vax1	0.0308007	LD
M00433_2.00	vax2	0.132074	LD
M00434_2.00	alx1	0.0267708	LD
M00434_2.00	lhx2b	0.138285	LD
M00434_2.00	lhx4	-0.0305271	LD
M00434_2.00	lhx9	0.104509	LD
M00434_2.00	lmx1al	0.00208679	LD
M00434_2.00	lmx1ba	0.00151683	LD
M00434_2.00	rx1	0.0941227	LD
M00434_2.00	rx2	0.0391274	LD
M00434_2.00	rx3	-0.0722238	LD
M00434_2.00	vsx1	-0.0996028	LD
M00435_2.00	alx1	-0.0091944	LD
M00435_2.00	gbx2	-0.00497217	LD
M00435_2.00	lhx1a	-0.00821109	LD
M00435_2.00	lhx2b	0.0491062	LD
M00435_2.00	lhx4	0.00864018	LD
M00435_2.00	lhx9	0.0244319	LD
M00435_2.00	lmx1al	-0.00713368	LD
M00435_2.00	lmx1ba	0.012997	LD
M00435_2.00	rx1	-0.015189	LD
M00435_2.00	rx2	-0.0497622	LD
M00435_2.00	rx3	-0.0254948	LD
M00435_2.00	vax1	-0.000775951	LD
M00435_2.00	vax2	0.0308087	LD
M00435_2.00	vsx1	0.0132136	LD
M00436_2.00	hoxc10a	-0.000433077	LD
M00437_2.00	meis1b	-0.0393616	LD
M00437_2.00	meis2a	0	LD
M00437_2.00	meis3	-0.0263437	LD
M00437_2.00	pknox1.1	0.0212683	LD
M00437_2.00	pknox1.2	0.020121	LD
M00437_2.00	pknox2	0.00812788	LD
M00437_2.00	tgif1	0.0190967	LD
M00439_2.00	alx1	0.00113018	LD
M00439_2.00	gbx2	0.0073599	LD
M00439_2.00	isl1	0.041408	LD
M00439_2.00	isl2a	0.032248	LD
M00439_2.00	isl2b	0.00356274	LD
M00439_2.00	lhx1a	0.00307352	LD
M00439_2.00	lhx2b	0.0418392	LD
M00439_2.00	lhx4	0.0421659	LD
M00439_2.00	lhx9	0.0405013	LD
M00439_2.00	lmx1al	0.0114002	LD
M00439_2.00	lmx1ba	0.0124669	LD
M00439_2.00	rx1	0.0108855	LD
M00439_2.00	rx2	0.0223847	LD
M00439_2.00	rx3	-0.0221693	LD
M00439_2.00	vax1	-0.00470043	LD
M00439_2.00	vax2	0.0159755	LD
M00439_2.00	vsx1	0.0206924	LD
M00440_2.00	crx	0.50534	LD
M00440_2.00	dmbx1a	0.0625212	LD
M00440_2.00	otx5	0.366327	LD
M00441_2.00	crx	0.485388	LD
M00441_2.00	dmbx1a	0.0573382	LD
M00441_2.00	otx5	0.370928	LD
M00442_2.00	alx1	0.0144148	LD
M00442_2.00	barhl1a	0.0544091	LD
M00442_2.00	barhl2	0.0634872	LD
M00442_2.00	gbx2	-0.0126444	LD
M00442_2.00	hmx1	0.0293923	LD
M00442_2.00	hmx3a	-0.0145448	LD
M00442_2.00	hmx4	0.0587508	LD
M00442_2.00	rx1	0.0275807	LD
M00442_2.00	rx2	-0.0545381	LD
M00442_2.00	rx3	-0.048196	LD
M00442_2.00	vax1	-0.0116489	LD
M00442_2.00	vax2	0.0451264	LD
M00442_2.00	vsx1	-0.036644	LD
M00443_2.00	alx1	0.00113018	LD
M00443_2.00	barhl1a	0.00968067	LD
M00443_2.00	barhl2	0.0316942	LD
M00443_2.00	gbx2	0.0073599	LD
M00443_2.00	lhx1a	0.00307352	LD
M00443_2.00	lhx2b	0.0418392	LD
M00443_2.00	lhx4	0.0421659	LD
M00443_2.00	lhx9	0.0405013	LD
M00443_2.00	lmx1al	0.0114002	LD
M00443_2.00	lmx1ba	0.0124669	LD
M00443_2.00	rx1	0.0108855	LD
M00443_2.00	rx2	0.0223847	LD
M00443_2.00	rx3	-0.0221693	LD
M00443_2.00	vax1	-0.00470043	LD
M00443_2.00	vax2	0.0159755	LD
M00443_2.00	vsx1	0.0206924	LD
M00444_2.00	hmbox1a	-0.0192519	LD
M00444_2.00	zgc:91944	-0.00129296	LD
M00445_2.00	alx1	-0.0091944	LD
M00445_2.00	lhx1a	-0.00821109	LD
M00445_2.00	lhx2b	0.0491062	LD
M00445_2.00	lhx4	0.00864018	LD
M00445_2.00	lhx9	0.0244319	LD
M00445_2.00	rx1	-0.015189	LD
M00445_2.00	rx2	-0.0497622	LD
M00445_2.00	rx3	-0.0254948	LD
M00445_2.00	vsx1	0.0132136	LD
M00446_2.00	alx1	-0.000619031	LD
M00446_2.00	barhl1a	-0.0007864	LD
M00446_2.00	barhl2	0.0213012	LD
M00446_2.00	gbx2	0.00411749	LD
M00446_2.00	hmx1	0.0474356	LD
M00446_2.00	hmx3a	-0.0338034	LD
M00446_2.00	hmx4	0.0698578	LD
M00446_2.00	lhx4	-0.0673072	LD
M00446_2.00	rx1	0.0709602	LD
M00446_2.00	rx2	-0.0457899	LD
M00446_2.00	rx3	-0.0294737	LD
M00446_2.00	vax1	0.0126052	LD
M00446_2.00	vax2	0.101504	LD
M00446_2.00	vsx1	-0.0161684	LD
M00448_2.00	alx1	0.00934289	LD
M00448_2.00	gbx2	0.00487257	LD
M00448_2.00	lhx2b	0.171709	LD
M00448_2.00	lhx4	-0.0684416	LD
M00448_2.00	lhx9	0.0980868	LD
M00448_2.00	lmx1al	-0.0185003	LD
M00448_2.00	lmx1ba	0.00197577	LD
M00448_2.00	rx1	0.0633291	LD
M00448_2.00	rx2	-0.0101865	LD
M00448_2.00	rx3	-0.0653136	LD
M00448_2.00	vax1	0.0200732	LD
M00448_2.00	vax2	0.0789776	LD
M00448_2.00	vsx1	-0.0729597	LD
M00449_2.00	alx1	-0.0295569	LD
M00449_2.00	barhl1a	0.0418984	LD
M00449_2.00	barhl2	0.079221	LD
M00449_2.00	gbx2	-0.00340175	LD
M00449_2.00	hmx4	0.0719392	LD
M00449_2.00	lhx1a	0.00786466	LD
M00449_2.00	vax1	0.0217291	LD
M00449_2.00	vax2	0.0925422	LD
M00450_2.00	gbx2	0.00985867	LD
M00450_2.00	vax1	0.0139467	LD
M00450_2.00	vax2	0.0716748	LD
M00452_2.00	alx1	-0.0141206	LD
M00452_2.00	gbx2	0.00328304	LD
M00452_2.00	lhx1a	-0.00942393	LD
M00452_2.00	lhx2b	0.0805353	LD
M00452_2.00	lhx4	-0.0243438	LD
M00452_2.00	lhx9	0.0297322	LD
M00452_2.00	lmx1al	-0.0297046	LD
M00452_2.00	lmx1ba	0.00153498	LD
M00452_2.00	rx1	-0.0186423	LD
M00452_2.00	rx2	-0.0510543	LD
M00452_2.00	rx3	-0.0178964	LD
M00452_2.00	vax1	-0.00974875	LD
M00452_2.00	vax2	0.0286841	LD
M00452_2.00	vsx1	0.00825807	LD
M00453_2.00	irx3a	0.0064757	LD
M00453_2.00	irx7	0.0156391	LD
M00454_2.00	irx3a	0.0158778	LD
M00454_2.00	irx7	0.0134089	LD
M00455_2.00	irx2a	0.0442251	LD
M00455_2.00	irx4b	0.008565	LD
M00455_2.00	irx5a	0.0175856	LD
M00455_2.00	irx6a	0.0239908	LD
M00456_2.00	irx2a	-0.064462	LD
M00456_2.00	irx4b	-0.0258541	LD
M00456_2.00	irx5a	-0.0673563	LD
M00456_2.00	irx6a	-0.0131445	LD
M00457_2.00	alx1	0.0188543	LD
M00457_2.00	barhl1a	0.0588916	LD
M00457_2.00	barhl2	0.0919739	LD
M00457_2.00	gbx2	-0.0216119	LD
M00457_2.00	rx1	-0.0201283	LD
M00457_2.00	rx2	-0.0530649	LD
M00457_2.00	rx3	-0.0250477	LD
M00457_2.00	vax1	-0.0126995	LD
M00457_2.00	vax2	0.0198435	LD
M00457_2.00	vsx1	-0.00515525	LD
M00458_2.00	isl1	-0.0387368	LD
M00458_2.00	isl2a	-0.00685395	LD
M00458_2.00	isl2b	-0.0264374	LD
M00458_2.00	vsx1	-0.0528956	LD
M00459_2.00	alx1	-0.002088	LD
M00459_2.00	gbx2	0.00167983	LD
M00459_2.00	isl1	0.118129	LD
M00459_2.00	isl2a	-0.0029723	LD
M00459_2.00	isl2b	0.155295	LD
M00459_2.00	lhx1a	0.00111109	LD
M00459_2.00	lhx2b	0.00839285	LD
M00459_2.00	lhx4	-0.0156757	LD
M00459_2.00	lhx9	0.00671074	LD
M00459_2.00	lmx1al	-0.0335099	LD
M00459_2.00	lmx1ba	0.0112075	LD
M00459_2.00	rx1	-0.0540872	LD
M00459_2.00	rx2	-0.0499706	LD
M00459_2.00	rx3	-0.016642	LD
M00459_2.00	vax1	-0.0225985	LD
M00459_2.00	vax2	-0.018068	LD
M00459_2.00	vsx1	0.0229401	LD
M00460_2.00	barhl1a	0.0149298	LD
M00460_2.00	barhl2	0.0117546	LD
M00460_2.00	gbx2	-0.0304663	LD
M00460_2.00	hmx1	0.0379548	LD
M00460_2.00	hmx3a	0.0176772	LD
M00460_2.00	rx1	0.0662822	LD
M00460_2.00	rx2	-0.0312013	LD
M00460_2.00	rx3	-0.0309198	LD
M00460_2.00	vax1	0.0296401	LD
M00460_2.00	vax2	0.116995	LD
M00462_2.00	alx1	0.0261817	LD
M00462_2.00	barhl1a	0.00807122	LD
M00462_2.00	barhl2	-0.0169085	LD
M00462_2.00	gbx2	0.00756851	LD
M00462_2.00	hmx1	0.0445031	LD
M00462_2.00	hmx3a	-0.0496429	LD
M00462_2.00	hmx4	0.0396429	LD
M00462_2.00	lhx2b	0.145004	LD
M00462_2.00	lhx4	-0.00660578	LD
M00462_2.00	lhx9	0.107948	LD
M00462_2.00	rx1	0.119969	LD
M00462_2.00	rx2	0.0448638	LD
M00462_2.00	rx3	-0.0899536	LD
M00462_2.00	vax1	0.00840909	LD
M00462_2.00	vax2	0.0982089	LD
M00462_2.00	vsx1	-0.116458	LD
M00463_2.00	hdx	0.0336116	LD
M00464_2.00	alx1	-0.00383028	LD
M00464_2.00	barhl1a	0.0565421	LD
M00464_2.00	barhl2	0.0922734	LD
M00464_2.00	gbx2	0.000190569	LD
M00464_2.00	hmx1	0.0079416	LD
M00464_2.00	hmx3a	-0.0249299	LD
M00464_2.00	hmx4	0.0132241	LD
M00464_2.00	lhx2b	0.0340029	LD
M00464_2.00	lhx4	-0.033677	LD
M00464_2.00	lhx9	0.0228481	LD
M00464_2.00	rx1	-0.0233204	LD
M00464_2.00	rx2	-0.0411402	LD
M00464_2.00	rx3	-0.0314426	LD
M00464_2.00	vax1	-0.0237854	LD
M00464_2.00	vax2	-0.00757735	LD
M00464_2.00	vsx1	0.00439236	LD
M00465_2.00	alx1	0.0123723	LD
M00465_2.00	barhl1a	0.0147247	LD
M00465_2.00	barhl2	-0.00444169	LD
M00465_2.00	gbx2	-0.00222555	LD
M00465_2.00	hmx1	0.0329531	LD
M00465_2.00	hmx3a	-0.0366546	LD
M00465_2.00	rx1	0.108791	LD
M00465_2.00	rx2	0.0223389	LD
M00465_2.00	rx3	-0.0824216	LD
M00465_2.00	vsx1	-0.101143	LD
M00467_2.00	alx1	0.00113018	LD
M00467_2.00	barhl1a	0.00968067	LD
M00467_2.00	barhl2	0.0316942	LD
M00467_2.00	gbx2	0.0073599	LD
M00467_2.00	lhx1a	0.00307352	LD
M00467_2.00	lhx2b	0.0418392	LD
M00467_2.00	lhx4	0.0421659	LD
M00467_2.00	lhx9	0.0405013	LD
M00467_2.00	lmx1al	0.0114002	LD
M00467_2.00	lmx1ba	0.0124669	LD
M00467_2.00	rx1	0.0108855	LD
M00467_2.00	rx2	0.0223847	LD
M00467_2.00	rx3	-0.0221693	LD
M00467_2.00	vax1	-0.00470043	LD
M00467_2.00	vax2	0.0159755	LD
M00467_2.00	vsx1	0.0206924	LD
M00468_2.00	meis1b	-0.00949741	LD
M00468_2.00	meis2a	0	LD
M00468_2.00	meis3	-0.00962443	LD
M00468_2.00	pknox1.1	0.0121835	LD
M00468_2.00	pknox1.2	0.0317295	LD
M00468_2.00	pknox2	0.0337063	LD
M00468_2.00	tgif1	0.00183908	LD
M00469_2.00	alx1	0.00341954	LD
M00469_2.00	gbx2	0.00440904	LD
M00469_2.00	hmx1	0.0122853	LD
M00469_2.00	hmx3a	-0.00925422	LD
M00469_2.00	hmx4	0.0105044	LD
M00469_2.00	lhx4	-0.0513575	LD
M00469_2.00	rx1	-0.0274945	LD
M00469_2.00	rx2	-0.0616937	LD
M00469_2.00	rx3	-0.0246696	LD
M00469_2.00	vax1	-0.0132348	LD
M00469_2.00	vax2	0.0220466	LD
M00469_2.00	vsx1	-0.0134791	LD
M00470_2.00	hoxc10a	-0.00348573	LD
M00471_2.00	alx1	0.00113018	LD
M00471_2.00	gbx2	0.0073599	LD
M00471_2.00	lhx1a	0.00307352	LD
M00471_2.00	lhx2b	0.0418392	LD
M00471_2.00	lhx4	0.0421659	LD
M00471_2.00	lhx9	0.0405013	LD
M00471_2.00	lmx1al	0.0114002	LD
M00471_2.00	lmx1ba	0.0124669	LD
M00471_2.00	rx1	0.0108855	LD
M00471_2.00	rx2	0.0223847	LD
M00471_2.00	rx3	-0.0221693	LD
M00471_2.00	vax1	-0.00470043	LD
M00471_2.00	vax2	0.0159755	LD
M00471_2.00	vsx1	0.0206924	LD
M00472_2.00	alx1	0.00113018	LD
M00472_2.00	gbx2	0.0073599	LD
M00472_2.00	lhx1a	0.00307352	LD
M00472_2.00	lhx2b	0.0418392	LD
M00472_2.00	lhx4	0.0421659	LD
M00472_2.00	lhx9	0.0405013	LD
M00472_2.00	lmx1al	0.0114002	LD
M00472_2.00	lmx1ba	0.0124669	LD
M00472_2.00	rx1	0.0108855	LD
M00472_2.00	rx2	0.0223847	LD
M00472_2.00	rx3	-0.0221693	LD
M00472_2.00	vax1	-0.00470043	LD
M00472_2.00	vax2	0.0159755	LD
M00472_2.00	vsx1	0.0206924	LD
M00473_2.00	hoxa13a	0.00932709	LD
M00474_2.00	hoxc10a	-0.00349225	LD
M00475_2.00	hoxc10a	-0.00797207	LD
M00478_2.00	gbx2	0.000190569	LD
M00478_2.00	hmx1	0.0079416	LD
M00478_2.00	hmx3a	-0.0249299	LD
M00478_2.00	hmx4	0.0132241	LD
M00478_2.00	vax1	-0.0237854	LD
M00478_2.00	vax2	-0.00757735	LD
M00479_2.00	gbx2	0.000182073	LD
M00479_2.00	hmx1	-0.0142433	LD
M00479_2.00	hmx3a	-0.00936997	LD
M00479_2.00	hmx4	-0.000504968	LD
M00479_2.00	vax1	-0.0309141	LD
M00479_2.00	vax2	-0.040205	LD
M00480_2.00	gbx2	-0.00702735	LD
M00480_2.00	hmx1	-0.00214619	LD
M00480_2.00	hmx3a	-0.0185407	LD
M00480_2.00	hmx4	0.0300317	LD
M00480_2.00	vax1	-0.0262682	LD
M00480_2.00	vax2	0.0355731	LD
M00482_2.00	alx1	-0.00423571	LD
M00482_2.00	lhx2b	0.150091	LD
M00482_2.00	lhx4	-0.0536725	LD
M00482_2.00	lhx9	0.0997668	LD
M00482_2.00	lmx1al	-0.0251634	LD
M00482_2.00	lmx1ba	0.0162211	LD
M00482_2.00	rx1	0.04472	LD
M00482_2.00	rx2	-0.0443168	LD
M00482_2.00	rx3	-0.0605658	LD
M00482_2.00	vsx1	-0.0464782	LD
M00483_2.00	six3a	-0.0196049	LD
[truncated: 73,460 more rows]

## Sheet: tab2
TF	Motif	Peak	Target	TF_Motif_Cor	PtoG_Class	GG_Corr	Triple	type	TF_fold	Target_fold	Peak_fold
rxraa	M04787	chr3:27841912-27842412	abat	0.0608	Body	0.128355	rxraa->chr3:27841912-27842412->abat	Act	0.560488	0.318589	0
vdrb	M02403_2.00	chr3:27841912-27842412	abat	0.121503	Body	0.155183	vdrb->chr3:27841912-27842412->abat	Act	0.421237	0.318589	0
sox13	M03487_2.00	chr3:27841912-27842412	abat	0.14668	Body	0.187	sox13->chr3:27841912-27842412->abat	Act	0.295973	0.318589	0
tead1a	M04142	chr3:28116887-28117387	abat	0.148445	Inter	0.14087	tead1a->chr3:28116887-28117387->abat	Act	0.371967	0.318589	0
foxo1a	M04257	chr3:28116887-28117387	abat	0.133348	Inter	0.219448	foxo1a->chr3:28116887-28117387->abat	Act	0.378908	0.318589	0
foxo1b	M10245	chr3:28116887-28117387	abat	0.0524549	Inter	0.120882	foxo1b->chr3:28116887-28117387->abat	Act	0.272074	0.318589	0
sox13	M03541_2.00	chr3:28116887-28117387	abat	0.199581	Inter	0.187	sox13->chr3:28116887-28117387->abat	Act	0.295973	0.318589	0
stat3	M00777	chr3:27880078-27880578	abat	0.197937	TSS	0.17785	stat3->chr3:27880078-27880578->abat	Act	0.327768	0.318589	1.16275
rorb	M00818_2.00	chr3:27880078-27880578	abat	0.112632	TSS	0.0811571	rorb->chr3:27880078-27880578->abat	Act	0.518637	0.318589	1.16275
rxraa	M00818_2.00	chr3:27880078-27880578	abat	0.10252	TSS	0.128355	rxraa->chr3:27880078-27880578->abat	Act	0.560488	0.318589	1.16275
foxo1a	M03051_2.00	chr3:27880078-27880578	abat	0.0896813	TSS	0.219448	foxo1a->chr3:27880078-27880578->abat	Act	0.378908	0.318589	1.16275
tcf7l2	M09638_2.00	chr3:27880078-27880578	abat	0.215026	TSS	0.17063	tcf7l2->chr3:27880078-27880578->abat	Act	0.32183	0.318589	1.16275
tead1a	M03995_2.00	chr9:14245789-14246289	abcb6b	0.334726	Body	0.0496862	tead1a->chr9:14245789-14246289->abcb6b	Act	0.371967	0.263266	0
fosl2	M08932	chr9:14273767-14274267	abcb6b	0.0856818	TSS	0.036967	fosl2->chr9:14273767-14274267->abcb6b	Act	0.273506	0.263266	1.34597
myb	M09813	chr7:10911741-10912241	abhd17c	0.0888425	TSS	0.112712	myb->chr7:10911741-10912241->abhd17c	Act	0.268851	0.290481	0
e2f3	M07938_2.00	chr7:10911741-10912241	abhd17c	0.0537974	TSS	0.135052	e2f3->chr7:10911741-10912241->abhd17c	Act	0.374128	0.290481	0
stat3	M01595	chr5:19340948-19341448	acacb	0.363513	Body	0.140777	stat3->chr5:19340948-19341448->acacb	Act	0.327768	0.311133	2.20653
rxraa	M02746_2.00	chr5:19340948-19341448	acacb	0.0719999	Body	0.129431	rxraa->chr5:19340948-19341448->acacb	Act	0.560488	0.311133	2.20653
fosl2	M00925	chr5:19110379-19110879	acacb	0.55321	Inter	0.129634	fosl2->chr5:19110379-19110879->acacb	Act	0.273506	0.311133	0
stat3	M01220	chr5:19110379-19110879	acacb	0.267055	Inter	0.140777	stat3->chr5:19110379-19110879->acacb	Act	0.327768	0.311133	0
foxo1a	M03823	chr5:19467155-19467655	acacb	0.456812	Inter	0.166822	foxo1a->chr5:19467155-19467655->acacb	Act	0.378908	0.311133	0
rxraa	M08954	chr5:19467155-19467655	acacb	0.138626	Inter	0.129431	rxraa->chr5:19467155-19467655->acacb	Act	0.560488	0.311133	0
fosl2	M04036_2.00	chr5:19467155-19467655	acacb	0.237779	Inter	0.129634	fosl2->chr5:19467155-19467655->acacb	Act	0.273506	0.311133	0
sox13	M07498_2.00	chr5:19467155-19467655	acacb	0.448551	Inter	0.179064	sox13->chr5:19467155-19467655->acacb	Act	0.295973	0.311133	0
rxraa	M00512	chr5:19574783-19575283	acacb	0.0638808	Inter	0.129431	rxraa->chr5:19574783-19575283->acacb	Act	0.560488	0.311133	0
sox13	M09387_2.00	chr5:19574783-19575283	acacb	0.605686	Inter	0.179064	sox13->chr5:19574783-19575283->acacb	Act	0.295973	0.311133	0
rarga	M03562	chr5:23700250-23700750	acsl4b	0.187177	Inter	0.373278	rarga->chr5:23700250-23700750->acsl4b	Act	0.281721	0.635113	0
rorb	M02401_2.00	chr5:23700250-23700750	acsl4b	0.138233	Inter	0.117482	rorb->chr5:23700250-23700750->acsl4b	Act	0.518637	0.635113	0
rxraa	M02401_2.00	chr5:23700250-23700750	acsl4b	0.0949827	Inter	0.312898	rxraa->chr5:23700250-23700750->acsl4b	Act	0.560488	0.635113	0
rarab	M11090_2.00	chr5:23700250-23700750	acsl4b	0.266	Inter	0.38611	rarab->chr5:23700250-23700750->acsl4b	Act	0.271116	0.635113	0
ar	M00447	chr5:23573727-23574227	acsl4b	0.204659	TSS	0.467442	ar->chr5:23573727-23574227->acsl4b	Act	0.456809	0.635113	0
rxraa	M00512	chr5:23573727-23574227	acsl4b	0.0638808	TSS	0.312898	rxraa->chr5:23573727-23574227->acsl4b	Act	0.560488	0.635113	0
nfixa	M02050	chr5:23573727-23574227	acsl4b	0.351999	TSS	0.286971	nfixa->chr5:23573727-23574227->acsl4b	Act	0.512419	0.635113	0
nr3c2	M04477	chr5:23573727-23574227	acsl4b	0.28069	TSS	0.357581	nr3c2->chr5:23573727-23574227->acsl4b	Act	0.390207	0.635113	0
stat3	M07065	chr5:23573727-23574227	acsl4b	0.338395	TSS	0.302331	stat3->chr5:23573727-23574227->acsl4b	Act	0.327768	0.635113	0
rarga	M02410_2.00	chr5:23573727-23574227	acsl4b	0.0640125	TSS	0.373278	rarga->chr5:23573727-23574227->acsl4b	Act	0.281721	0.635113	0
rorb	M02410_2.00	chr5:23573727-23574227	acsl4b	0.132588	TSS	0.117482	rorb->chr5:23573727-23574227->acsl4b	Act	0.518637	0.635113	0
rarab	M08152_2.00	chr5:23573727-23574227	acsl4b	0.165232	TSS	0.38611	rarab->chr5:23573727-23574227->acsl4b	Act	0.271116	0.635113	0
tead1a	M09434_2.00	chr5:23573727-23574227	acsl4b	0.302181	TSS	0.225069	tead1a->chr5:23573727-23574227->acsl4b	Act	0.371967	0.635113	0
foxo1a	M10537_2.00	chr5:23573727-23574227	acsl4b	0.142621	TSS	0.319046	foxo1a->chr5:23573727-23574227->acsl4b	Act	0.378908	0.635113	0
rarab	M05678_2.00	chr12:45073371-45073871	ADAM12	0.145944	Body	0.453974	rarab->chr12:45073371-45073871->ADAM12	Act	0.271116	0.313717	0
rorb	M05678_2.00	chr12:45073371-45073871	ADAM12	0.210595	Body	0.0509448	rorb->chr12:45073371-45073871->ADAM12	Act	0.518637	0.313717	0
ar	M07986_2.00	chr12:45073371-45073871	ADAM12	0.304091	Body	0.547624	ar->chr12:45073371-45073871->ADAM12	Act	0.456809	0.313717	0
nr3c2	M07986_2.00	chr12:45073371-45073871	ADAM12	0.279897	Body	0.404818	nr3c2->chr12:45073371-45073871->ADAM12	Act	0.390207	0.313717	0
mef2aa	M08149_2.00	chr12:45073371-45073871	ADAM12	0.0680595	Body	0.309456	mef2aa->chr12:45073371-45073871->ADAM12	Act	0.308083	0.313717	0
foxo1a	M03823	chr12:45079953-45080453	ADAM12	0.456812	Body	0.312419	foxo1a->chr12:45079953-45080453->ADAM12	Act	0.378908	0.313717	0
lhx2b	M07047	chr12:45079953-45080453	ADAM12	0.193645	Body	0.439284	lhx2b->chr12:45079953-45080453->ADAM12	Act	0.275906	0.313717	0
stat3	M10081	chr12:45079953-45080453	ADAM12	0.353104	Body	0.299256	stat3->chr12:45079953-45080453->ADAM12	Act	0.327768	0.313717	0
sox13	M00213_2.00	chr12:45079953-45080453	ADAM12	0.444439	Body	0.398411	sox13->chr12:45079953-45080453->ADAM12	Act	0.295973	0.313717	0
foxn3	M03746_2.00	chr12:45079953-45080453	ADAM12	0.0858393	Body	0.146686	foxn3->chr12:45079953-45080453->ADAM12	Act	0.454143	0.313717	0
rarab	M06412_2.00	chr12:45079953-45080453	ADAM12	0.18628	Body	0.453974	rarab->chr12:45079953-45080453->ADAM12	Act	0.271116	0.313717	0
rorb	M06412_2.00	chr12:45079953-45080453	ADAM12	0.25014	Body	0.0509448	rorb->chr12:45079953-45080453->ADAM12	Act	0.518637	0.313717	0
sox13	M09787	chr12:44820991-44821491	ADAM12	0.540612	Inter	0.398411	sox13->chr12:44820991-44821491->ADAM12	Act	0.295973	0.313717	0
ar	M09589	chr12:44821612-44822112	ADAM12	0.273931	Inter	0.547624	ar->chr12:44821612-44822112->ADAM12	Act	0.456809	0.313717	0
foxo1a	M03021_2.00	chr12:44821612-44822112	ADAM12	0.321064	Inter	0.312419	foxo1a->chr12:44821612-44822112->ADAM12	Act	0.378908	0.313717	0
sox13	M11340_2.00	chr12:44821612-44822112	ADAM12	0.404669	Inter	0.398411	sox13->chr12:44821612-44822112->ADAM12	Act	0.295973	0.313717	0
foxo1a	M01216	chr12:44879355-44879855	ADAM12	0.3512	Inter	0.312419	foxo1a->chr12:44879355-44879855->ADAM12	Act	0.378908	0.313717	0
sox13	M08041_2.00	chr12:44879355-44879855	ADAM12	0.358239	Inter	0.398411	sox13->chr12:44879355-44879855->ADAM12	Act	0.295973	0.313717	0
tcf7l2	M09392_2.00	chr12:44879355-44879855	ADAM12	0.465533	Inter	0.360788	tcf7l2->chr12:44879355-44879855->ADAM12	Act	0.32183	0.313717	0
foxo1a	M03823	chr12:44893181-44893681	ADAM12	0.456812	Inter	0.312419	foxo1a->chr12:44893181-44893681->ADAM12	Act	0.378908	0.313717	0
lhx2b	M00280_2.00	chr12:44893181-44893681	ADAM12	0.0564977	Inter	0.439284	lhx2b->chr12:44893181-44893681->ADAM12	Act	0.275906	0.313717	0
tcf7l2	M00712_2.00	chr12:44893181-44893681	ADAM12	0.358468	Inter	0.360788	tcf7l2->chr12:44893181-44893681->ADAM12	Act	0.32183	0.313717	0
foxn3	M03746_2.00	chr12:44893181-44893681	ADAM12	0.0858393	Inter	0.146686	foxn3->chr12:44893181-44893681->ADAM12	Act	0.454143	0.313717	0
sox13	M11331_2.00	chr12:44893181-44893681	ADAM12	0.537607	Inter	0.398411	sox13->chr12:44893181-44893681->ADAM12	Act	0.295973	0.313717	0
ar	M00956	chr12:44893714-44894214	ADAM12	0.275009	Inter	0.547624	ar->chr12:44893714-44894214->ADAM12	Act	0.456809	0.313717	0
lhx2b	M03183_2.00	chr12:44893714-44894214	ADAM12	0.0854321	Inter	0.439284	lhx2b->chr12:44893714-44894214->ADAM12	Act	0.275906	0.313717	0
rorb	M00181_2.00	chr12:44898855-44899355	ADAM12	0.1411	Inter	0.0509448	rorb->chr12:44898855-44899355->ADAM12	Act	0.518637	0.313717	0
rarab	M03392_2.00	chr12:44898855-44899355	ADAM12	0.0568546	Inter	0.453974	rarab->chr12:44898855-44899355->ADAM12	Act	0.271116	0.313717	0
sox13	M03545_2.00	chr12:44898855-44899355	ADAM12	0.143025	Inter	0.398411	sox13->chr12:44898855-44899355->ADAM12	Act	0.295973	0.313717	0
lhx2b	M05040_2.00	chr12:44898855-44899355	ADAM12	0.27414	Inter	0.439284	lhx2b->chr12:44898855-44899355->ADAM12	Act	0.275906	0.313717	0
ar	M00962	chr12:44910439-44910939	ADAM12	0.28152	Inter	0.547624	ar->chr12:44910439-44910939->ADAM12	Act	0.456809	0.313717	0
foxo1a	M03823	chr12:44910439-44910939	ADAM12	0.456812	Inter	0.312419	foxo1a->chr12:44910439-44910939->ADAM12	Act	0.378908	0.313717	0
stat3	M10383	chr12:44910439-44910939	ADAM12	0.309454	Inter	0.299256	stat3->chr12:44910439-44910939->ADAM12	Act	0.327768	0.313717	0
tcf7l2	M02646_2.00	chr12:44910439-44910939	ADAM12	0.148628	Inter	0.360788	tcf7l2->chr12:44910439-44910939->ADAM12	Act	0.32183	0.313717	0
foxo1a	M08241	chr12:44919419-44919919	ADAM12	0.185905	Inter	0.312419	foxo1a->chr12:44919419-44919919->ADAM12	Act	0.378908	0.313717	1.93154
lhx2b	M00284_2.00	chr12:44919419-44919919	ADAM12	0.106016	Inter	0.439284	lhx2b->chr12:44919419-44919919->ADAM12	Act	0.275906	0.313717	1.93154
rorb	M03934_2.00	chr12:44919419-44919919	ADAM12	0.0955536	Inter	0.0509448	rorb->chr12:44919419-44919919->ADAM12	Act	0.518637	0.313717	1.93154
klf12b	M08857_2.00	chr12:44919419-44919919	ADAM12	0.0584093	Inter	0.374908	klf12b->chr12:44919419-44919919->ADAM12	Act	0.342959	0.313717	1.93154
sox13	M11340_2.00	chr12:44919419-44919919	ADAM12	0.404669	Inter	0.398411	sox13->chr12:44919419-44919919->ADAM12	Act	0.295973	0.313717	1.93154
foxo1a	M03823	chr12:44957098-44957598	ADAM12	0.456812	Inter	0.312419	foxo1a->chr12:44957098-44957598->ADAM12	Act	0.378908	0.313717	0.975481
lhx2b	M05068_2.00	chr12:44957098-44957598	ADAM12	0.121377	Inter	0.439284	lhx2b->chr12:44957098-44957598->ADAM12	Act	0.275906	0.313717	0.975481
rorb	M05606_2.00	chr12:44957098-44957598	ADAM12	0.217011	Inter	0.0509448	rorb->chr12:44957098-44957598->ADAM12	Act	0.518637	0.313717	0.975481
sox13	M06449_2.00	chr12:44957098-44957598	ADAM12	0.556483	Inter	0.398411	sox13->chr12:44957098-44957598->ADAM12	Act	0.295973	0.313717	0.975481
ar	M08189	chr12:45163927-45164427	ADAM12	0.387419	Inter	0.547624	ar->chr12:45163927-45164427->ADAM12	Act	0.456809	0.313717	0
sox13	M01026_2.00	chr12:45163927-45164427	ADAM12	0.478959	Inter	0.398411	sox13->chr12:45163927-45164427->ADAM12	Act	0.295973	0.313717	0
stat3	M00223	chr12:45197583-45198083	ADAM12	0.267699	Inter	0.299256	stat3->chr12:45197583-45198083->ADAM12	Act	0.327768	0.313717	0
rarab	M02891	chr12:45197583-45198083	ADAM12	0.0867125	Inter	0.453974	rarab->chr12:45197583-45198083->ADAM12	Act	0.271116	0.313717	0
lhx2b	M07047	chr12:45197583-45198083	ADAM12	0.193645	Inter	0.439284	lhx2b->chr12:45197583-45198083->ADAM12	Act	0.275906	0.313717	0
sox13	M03494_2.00	chr12:45197583-45198083	ADAM12	0.0699735	Inter	0.398411	sox13->chr12:45197583-45198083->ADAM12	Act	0.295973	0.313717	0
rxraa	M01153	chr7:42459946-42460446	adamts18	0.199716	Body	0.350744	rxraa->chr7:42459946-42460446->adamts18	Act	0.560488	0.354289	0
vdrb	M04498	chr7:42459946-42460446	adamts18	0.0927878	Body	0.0484	vdrb->chr7:42459946-42460446->adamts18	Act	0.421237	0.354289	0
nr2e1	M00182_2.00	chr7:42459946-42460446	adamts18	0.208183	Body	0.249063	nr2e1->chr7:42459946-42460446->adamts18	Act	0.345467	0.354289	0
tead1a	M03575_2.00	chr7:42459946-42460446	adamts18	0.157322	Body	0.0665024	tead1a->chr7:42459946-42460446->adamts18	Act	0.371967	0.354289	0
rorb	M05565_2.00	chr7:42459946-42460446	adamts18	0.0777675	Body	0.202533	rorb->chr7:42459946-42460446->adamts18	Act	0.518637	0.354289	0
rarab	M05650_2.00	chr7:42459946-42460446	adamts18	0.0903116	Body	0.237298	rarab->chr7:42459946-42460446->adamts18	Act	0.271116	0.354289	0
nr3c2	M09318_2.00	chr7:42459946-42460446	adamts18	0.283493	Body	0.251147	nr3c2->chr7:42459946-42460446->adamts18	Act	0.390207	0.354289	0
sox13	M03971_2.00	chr7:42461680-42462180	adamts18	0.133726	Body	0.265041	sox13->chr7:42461680-42462180->adamts18	Act	0.295973	0.354289	0
lhx2b	M06276_2.00	chr7:42461680-42462180	adamts18	0.149637	Body	0.226053	lhx2b->chr7:42461680-42462180->adamts18	Act	0.275906	0.354289	0
nfixa	M00056	chr7:42462899-42463399	adamts18	0.0745108	Body	0.299368	nfixa->chr7:42462899-42463399->adamts18	Act	0.512419	0.354289	0
foxo1a	M03823	chr7:42462899-42463399	adamts18	0.456812	Body	0.0774905	foxo1a->chr7:42462899-42463399->adamts18	Act	0.378908	0.354289	0
gli2a	M05331	chr7:42462899-42463399	adamts18	0.190092	Body	0.207759	gli2a->chr7:42462899-42463399->adamts18	Act	0.398694	0.354289	0
nr2e1	M03358_2.00	chr7:42462899-42463399	adamts18	0.0836499	Body	0.249063	nr2e1->chr7:42462899-42463399->adamts18	Act	0.345467	0.354289	0
sox13	M05791_2.00	chr7:42462899-42463399	adamts18	0.534961	Body	0.265041	sox13->chr7:42462899-42463399->adamts18	Act	0.295973	0.354289	0
lhx2b	M06500_2.00	chr7:42462899-42463399	adamts18	0.395248	Body	0.226053	lhx2b->chr7:42462899-42463399->adamts18	Act	0.275906	0.354289	0
rxraa	M08155_2.00	chr7:42462899-42463399	adamts18	0.146519	Body	0.350744	rxraa->chr7:42462899-42463399->adamts18	Act	0.560488	0.354289	0
rarab	M09263_2.00	chr7:42462899-42463399	adamts18	0.115508	Body	0.237298	rarab->chr7:42462899-42463399->adamts18	Act	0.271116	0.354289	0
rorb	M09263_2.00	chr7:42462899-42463399	adamts18	0.11617	Body	0.202533	rorb->chr7:42462899-42463399->adamts18	Act	0.518637	0.354289	0
nr2e1	M03358_2.00	chr7:42463659-42464159	adamts18	0.0836499	Body	0.249063	nr2e1->chr7:42463659-42464159->adamts18	Act	0.345467	0.354289	3.41533
vdrb	M03925_2.00	chr7:42463659-42464159	adamts18	0.0971203	Body	0.0484	vdrb->chr7:42463659-42464159->adamts18	Act	0.421237	0.354289	3.41533
rxraa	M08155_2.00	chr7:42463659-42464159	adamts18	0.146519	Body	0.350744	rxraa->chr7:42463659-42464159->adamts18	Act	0.560488	0.354289	3.41533
mef2aa	M08213_2.00	chr7:42463659-42464159	adamts18	0.0535593	Body	0.215818	mef2aa->chr7:42463659-42464159->adamts18	Act	0.308083	0.354289	3.41533
rarab	M09263_2.00	chr7:42463659-42464159	adamts18	0.115508	Body	0.237298	rarab->chr7:42463659-42464159->adamts18	Act	0.271116	0.354289	3.41533
rorb	M09263_2.00	chr7:42463659-42464159	adamts18	0.11617	Body	0.202533	rorb->chr7:42463659-42464159->adamts18	Act	0.518637	0.354289	3.41533
rxraa	M00762	chr7:42478561-42479061	adamts18	0.063149	Body	0.350744	rxraa->chr7:42478561-42479061->adamts18	Act	0.560488	0.354289	0
rarab	M02787	chr7:42478561-42479061	adamts18	0.0506533	Body	0.237298	rarab->chr7:42478561-42479061->adamts18	Act	0.271116	0.354289	0
rorb	M00818_2.00	chr7:42478561-42479061	adamts18	0.112632	Body	0.202533	rorb->chr7:42478561-42479061->adamts18	Act	0.518637	0.354289	0
nr2e1	M03362_2.00	chr7:42478561-42479061	adamts18	0.18176	Body	0.249063	nr2e1->chr7:42478561-42479061->adamts18	Act	0.345467	0.354289	0
nfixa	M05741_2.00	chr7:42478561-42479061	adamts18	0.375635	Body	0.299368	nfixa->chr7:42478561-42479061->adamts18	Act	0.512419	0.354289	0
mef2aa	M00231	chr7:42430932-42431432	adamts18	0.0566688	Inter	0.215818	mef2aa->chr7:42430932-42431432->adamts18	Act	0.308083	0.354289	0
vdrb	M00444	chr7:42430932-42431432	adamts18	0.090754	Inter	0.0484	vdrb->chr7:42430932-42431432->adamts18	Act	0.421237	0.354289	0
nfixa	M07363	chr7:42430932-42431432	adamts18	0.212682	Inter	0.299368	nfixa->chr7:42430932-42431432->adamts18	Act	0.512419	0.354289	0
rorb	M08782	chr7:42430932-42431432	adamts18	0.178997	Inter	0.202533	rorb->chr7:42430932-42431432->adamts18	Act	0.518637	0.354289	0
rxraa	M09833	chr7:42430932-42431432	adamts18	0.26616	Inter	0.350744	rxraa->chr7:42430932-42431432->adamts18	Act	0.560488	0.354289	0
rarab	M02706_2.00	chr7:42430932-42431432	adamts18	0.315051	Inter	0.237298	rarab->chr7:42430932-42431432->adamts18	Act	0.271116	0.354289	0
lhx2b	M03109_2.00	chr7:42430932-42431432	adamts18	0.0533088	Inter	0.226053	lhx2b->chr7:42430932-42431432->adamts18	Act	0.275906	0.354289	0
rorb	M01722	chr7:42444271-42444771	adamts18	0.411551	Inter	0.202533	rorb->chr7:42444271-42444771->adamts18	Act	0.518637	0.354289	0
rarab	M00819_2.00	chr7:42444271-42444771	adamts18	0.0578609	Inter	0.237298	rarab->chr7:42444271-42444771->adamts18	Act	0.271116	0.354289	0
rxraa	M00819_2.00	chr7:42444271-42444771	adamts18	0.122453	Inter	0.350744	rxraa->chr7:42444271-42444771->adamts18	Act	0.560488	0.354289	0
nr3c2	M09331_2.00	chr7:42444271-42444771	adamts18	0.337032	Inter	0.251147	nr3c2->chr7:42444271-42444771->adamts18	Act	0.390207	0.354289	0
rxraa	M00966	chr7:42605445-42605945	adamts18	0.134742	Inter	0.350744	rxraa->chr7:42605445-42605945->adamts18	Act	0.560488	0.354289	0
vdrb	M00966	chr7:42605445-42605945	adamts18	0.0945183	Inter	0.0484	vdrb->chr7:42605445-42605945->adamts18	Act	0.421237	0.354289	0
foxo1a	M03021_2.00	chr7:42605445-42605945	adamts18	0.321064	Inter	0.0774905	foxo1a->chr7:42605445-42605945->adamts18	Act	0.378908	0.354289	0
sox13	M03978_2.00	chr7:42605445-42605945	adamts18	0.208746	Inter	0.265041	sox13->chr7:42605445-42605945->adamts18	Act	0.295973	0.354289	0
rorb	M05646_2.00	chr7:42605445-42605945	adamts18	0.0695909	Inter	0.202533	rorb->chr7:42605445-42605945->adamts18	Act	0.518637	0.354289	0
lhx2b	M06500_2.00	chr7:42605445-42605945	adamts18	0.395248	Inter	0.226053	lhx2b->chr7:42605445-42605945->adamts18	Act	0.275906	0.354289	0
nr2e1	M08220_2.00	chr7:42605445-42605945	adamts18	0.0537304	Inter	0.249063	nr2e1->chr7:42605445-42605945->adamts18	Act	0.345467	0.354289	0
lhx2b	M07047	chr7:42643179-42643679	adamts18	0.193645	Inter	0.226053	lhx2b->chr7:42643179-42643679->adamts18	Act	0.275906	0.354289	2.71228
rarab	M03391_2.00	chr7:42643179-42643679	adamts18	0.0695662	Inter	0.237298	rarab->chr7:42643179-42643679->adamts18	Act	0.271116	0.354289	2.71228
rorb	M03391_2.00	chr7:42643179-42643679	adamts18	0.0504279	Inter	0.202533	rorb->chr7:42643179-42643679->adamts18	Act	0.518637	0.354289	2.71228
rxraa	M03391_2.00	chr7:42643179-42643679	adamts18	0.0922889	Inter	0.350744	rxraa->chr7:42643179-42643679->adamts18	Act	0.560488	0.354289	2.71228
sox13	M01014	chr7:42679939-42680439	adamts18	0.382335	Inter	0.265041	sox13->chr7:42679939-42680439->adamts18	Act	0.295973	0.354289	0
nfixa	M02050	chr7:42679939-42680439	adamts18	0.351999	Inter	0.299368	nfixa->chr7:42679939-42680439->adamts18	Act	0.512419	0.354289	0
nr2e1	M08220_2.00	chr7:42679939-42680439	adamts18	0.0537304	Inter	0.249063	nr2e1->chr7:42679939-42680439->adamts18	Act	0.345467	0.354289	0
rorb	M05565_2.00	chr7:42459307-42459807	adamts18	0.0777675	TSS	0.202533	rorb->chr7:42459307-42459807->adamts18	Act	0.518637	0.354289	0
rxraa	M05565_2.00	chr7:42459307-42459807	adamts18	0.0618746	TSS	0.350744	rxraa->chr7:42459307-42459807->adamts18	Act	0.560488	0.354289	0
rarab	M05650_2.00	chr7:42459307-42459807	adamts18	0.0903116	TSS	0.237298	rarab->chr7:42459307-42459807->adamts18	Act	0.271116	0.354289	0
lhx2b	M07047	chr7:42460785-42461285	adamts18	0.193645	TSS	0.226053	lhx2b->chr7:42460785-42461285->adamts18	Act	0.275906	0.354289	0
sox13	M03971_2.00	chr7:42462187-42462687	adamts18	0.133726	TSS	0.265041	sox13->chr7:42462187-42462687->adamts18	Act	0.295973	0.354289	0
gli2a	M02641_2.00	chr17:17528391-17528891	adck1	0.163271	Body	0.234944	gli2a->chr17:17528391-17528891->adck1	Act	0.398694	0.309312	0
foxo1a	M03823	chr17:17607937-17608437	adck1	0.456812	Body	0.18927	foxo1a->chr17:17607937-17608437->adck1	Act	0.378908	0.309312	0
rarab	M00820_2.00	chr17:17607937-17608437	adck1	0.179555	Body	0.179241	rarab->chr17:17607937-17608437->adck1	Act	0.271116	0.309312	0
rarab	M02706_2.00	chr17:17972645-17973145	adck1	0.315051	Inter	0.179241	rarab->chr17:17972645-17973145->adck1	Act	0.271116	0.309312	0
foxo1a	M08241	chr17:17986688-17987188	adck1	0.185905	Inter	0.18927	foxo1a->chr17:17986688-17987188->adck1	Act	0.378908	0.309312	0
erfl3	M09072_2.00	chr17:17986688-17987188	adck1	0.132836	Inter	0.153709	erfl3->chr17:17986688-17987188->adck1	Act	0.412952	0.309312	0
tcf7l2	M07136	chr17:17758435-17758935	adck1	0.232667	TSS	0.122445	tcf7l2->chr17:17758435-17758935->adck1	Act	0.32183	0.309312	0
foxo1a	M07286	chr17:17758435-17758935	adck1	0.311178	TSS	0.18927	foxo1a->chr17:17758435-17758935->adck1	Act	0.378908	0.309312	0
tcf7l1b	M10095	chr17:17758435-17758935	adck1	0.13653	TSS	0.178896	tcf7l1b->chr17:17758435-17758935->adck1	Act	0.390873	0.309312	0
foxo1a	M07286	chr17:17758937-17759437	adck1	0.311178	TSS	0.18927	foxo1a->chr17:17758937-17759437->adck1	Act	0.378908	0.309312	0
fosl2	M08932	chr17:17758937-17759437	adck1	0.0856818	TSS	0.133878	fosl2->chr17:17758937-17759437->adck1	Act	0.273506	0.309312	0
sox13	M03507_2.00	chr17:17758937-17759437	adck1	0.113476	TSS	0.207476	sox13->chr17:17758937-17759437->adck1	Act	0.295973	0.309312	0
erfl3	M07950_2.00	chr17:17758937-17759437	adck1	0.068887	TSS	0.153709	erfl3->chr17:17758937-17759437->adck1	Act	0.412952	0.309312	0
rarab	M08152_2.00	chr17:17758937-17759437	adck1	0.165232	TSS	0.179241	rarab->chr17:17758937-17759437->adck1	Act	0.271116	0.309312	0
fosl2	M08932	chr17:17759443-17759943	adck1	0.0856818	TSS	0.133878	fosl2->chr17:17759443-17759943->adck1	Act	0.273506	0.309312	0
rarab	M08152_2.00	chr17:17759443-17759943	adck1	0.165232	TSS	0.179241	rarab->chr17:17759443-17759943->adck1	Act	0.271116	0.309312	0
lhx2b	M07047	chr6:32972380-32972880	adcyap1r1a	0.193645	Body	0.609079	lhx2b->chr6:32972380-32972880->adcyap1r1a	Act	0.275906	0.747634	0
vax2	M05143_2.00	chr6:32972380-32972880	adcyap1r1a	0.165068	Body	0.411513	vax2->chr6:32972380-32972880->adcyap1r1a	Act	0.459159	0.747634	0
ar	M08189	chr6:33023466-33023966	adcyap1r1a	0.387419	Body	0.710427	ar->chr6:33023466-33023966->adcyap1r1a	Act	0.456809	0.747634	0
rorb	M02388_2.00	chr6:33023466-33023966	adcyap1r1a	0.218702	Body	0.140442	rorb->chr6:33023466-33023966->adcyap1r1a	Act	0.518637	0.747634	0
sox13	M03506_2.00	chr6:33023466-33023966	adcyap1r1a	0.0573099	Body	0.536361	sox13->chr6:33023466-33023966->adcyap1r1a	Act	0.295973	0.747634	0
ar	M08189	chr6:33040882-33041382	adcyap1r1a	0.387419	Inter	0.710427	ar->chr6:33040882-33041382->adcyap1r1a	Act	0.456809	0.747634	0
rarab	M00820_2.00	chr6:33040882-33041382	adcyap1r1a	0.179555	Inter	0.597284	rarab->chr6:33040882-33041382->adcyap1r1a	Act	0.271116	0.747634	0
rorb	M00820_2.00	chr6:33040882-33041382	adcyap1r1a	0.344202	Inter	0.140442	rorb->chr6:33040882-33041382->adcyap1r1a	Act	0.518637	0.747634	0
sox13	M03484_2.00	chr6:33040882-33041382	adcyap1r1a	0.154662	Inter	0.536361	sox13->chr6:33040882-33041382->adcyap1r1a	Act	0.295973	0.747634	0
lhx2b	M05038_2.00	chr6:33040882-33041382	adcyap1r1a	0.289592	Inter	0.609079	lhx2b->chr6:33040882-33041382->adcyap1r1a	Act	0.275906	0.747634	0
vax2	M05038_2.00	chr6:33040882-33041382	adcyap1r1a	0.165068	Inter	0.411513	vax2->chr6:33040882-33041382->adcyap1r1a	Act	0.459159	0.747634	0
nr3c2	M09266_2.00	chr6:33040882-33041382	adcyap1r1a	0.274293	Inter	0.550841	nr3c2->chr6:33040882-33041382->adcyap1r1a	Act	0.390207	0.747634	0
vax2	M04447	chr6:33051677-33052177	adcyap1r1a	0.101504	Inter	0.411513	vax2->chr6:33051677-33052177->adcyap1r1a	Act	0.459159	0.747634	0
lhx2b	M07047	chr6:33051677-33052177	adcyap1r1a	0.193645	Inter	0.609079	lhx2b->chr6:33051677-33052177->adcyap1r1a	Act	0.275906	0.747634	0
rorb	M02388_2.00	chr6:33051677-33052177	adcyap1r1a	0.218702	Inter	0.140442	rorb->chr6:33051677-33052177->adcyap1r1a	Act	0.518637	0.747634	0
sox13	M05765_2.00	chr6:33051677-33052177	adcyap1r1a	0.532446	Inter	0.536361	sox13->chr6:33051677-33052177->adcyap1r1a	Act	0.295973	0.747634	0
gli2a	M08023_2.00	chr6:33051677-33052177	adcyap1r1a	0.061166	Inter	0.639386	gli2a->chr6:33051677-33052177->adcyap1r1a	Act	0.398694	0.747634	0
tead1a	M04141	chr6:33130224-33130724	adcyap1r1a	0.321624	Inter	0.236295	tead1a->chr6:33130224-33130724->adcyap1r1a	Act	0.371967	0.747634	0
ar	M08189	chr6:33130224-33130724	adcyap1r1a	0.387419	Inter	0.710427	ar->chr6:33130224-33130724->adcyap1r1a	Act	0.456809	0.747634	0
rorb	M08782	chr6:33130224-33130724	adcyap1r1a	0.178997	Inter	0.140442	rorb->chr6:33130224-33130724->adcyap1r1a	Act	0.518637	0.747634	0
lhx2b	M07047	chr6:33141916-33142416	adcyap1r1a	0.193645	Inter	0.609079	lhx2b->chr6:33141916-33142416->adcyap1r1a	Act	0.275906	0.747634	0.419015
vax2	M03128_2.00	chr6:33141916-33142416	adcyap1r1a	0.209543	Inter	0.411513	vax2->chr6:33141916-33142416->adcyap1r1a	Act	0.459159	0.747634	0.419015
sox13	M03534_2.00	chr6:33141916-33142416	adcyap1r1a	0.0637747	Inter	0.536361	sox13->chr6:33141916-33142416->adcyap1r1a	Act	0.295973	0.747634	0.419015
rarab	M05884_2.00	chr6:33141916-33142416	adcyap1r1a	0.293864	Inter	0.597284	rarab->chr6:33141916-33142416->adcyap1r1a	Act	0.271116	0.747634	0.419015
rorb	M05884_2.00	chr6:33141916-33142416	adcyap1r1a	0.524028	Inter	0.140442	rorb->chr6:33141916-33142416->adcyap1r1a	Act	0.518637	0.747634	0.419015
tead1a	M09438_2.00	chr6:33141916-33142416	adcyap1r1a	0.321019	Inter	0.236295	tead1a->chr6:33141916-33142416->adcyap1r1a	Act	0.371967	0.747634	0.419015
lhx2b	M07047	chr6:33146961-33147461	adcyap1r1a	0.193645	Inter	0.609079	lhx2b->chr6:33146961-33147461->adcyap1r1a	Act	0.275906	0.747634	0
sox13	M03483_2.00	chr6:33146961-33147461	adcyap1r1a	0.0999395	Inter	0.536361	sox13->chr6:33146961-33147461->adcyap1r1a	Act	0.295973	0.747634	0
vax2	M05219_2.00	chr6:33146961-33147461	adcyap1r1a	0.077806	Inter	0.411513	vax2->chr6:33146961-33147461->adcyap1r1a	Act	0.459159	0.747634	0
rarab	M09276_2.00	chr6:33146961-33147461	adcyap1r1a	0.367431	Inter	0.597284	rarab->chr6:33146961-33147461->adcyap1r1a	Act	0.271116	0.747634	0
rorb	M09276_2.00	chr6:33146961-33147461	adcyap1r1a	0.524613	Inter	0.140442	rorb->chr6:33146961-33147461->adcyap1r1a	Act	0.518637	0.747634	0
tcf7l2	M09392_2.00	chr6:33146961-33147461	adcyap1r1a	0.465533	Inter	0.48715	tcf7l2->chr6:33146961-33147461->adcyap1r1a	Act	0.32183	0.747634	0
tead1a	M04141	chr6:33179529-33180029	adcyap1r1a	0.321624	Inter	0.236295	tead1a->chr6:33179529-33180029->adcyap1r1a	Act	0.371967	0.747634	0
ar	M08189	chr6:33179529-33180029	adcyap1r1a	0.387419	Inter	0.710427	ar->chr6:33179529-33180029->adcyap1r1a	Act	0.456809	0.747634	0
lhx2b	M00279_2.00	chr6:33179529-33180029	adcyap1r1a	0.163121	Inter	0.609079	lhx2b->chr6:33179529-33180029->adcyap1r1a	Act	0.275906	0.747634	0
vax2	M00279_2.00	chr6:33179529-33180029	adcyap1r1a	0.105123	Inter	0.411513	vax2->chr6:33179529-33180029->adcyap1r1a	Act	0.459159	0.747634	0
rorb	M00811_2.00	chr6:33179529-33180029	adcyap1r1a	0.0565426	Inter	0.140442	rorb->chr6:33179529-33180029->adcyap1r1a	Act	0.518637	0.747634	0
rarab	M05566_2.00	chr6:33179529-33180029	adcyap1r1a	0.087917	Inter	0.597284	rarab->chr6:33179529-33180029->adcyap1r1a	Act	0.271116	0.747634	0
rarab	M02707_2.00	chr6:33194095-33194595	adcyap1r1a	0.0813992	Inter	0.597284	rarab->chr6:33194095-33194595->adcyap1r1a	Act	0.271116	0.747634	0
rorb	M02707_2.00	chr6:33194095-33194595	adcyap1r1a	0.163063	Inter	0.140442	rorb->chr6:33194095-33194595->adcyap1r1a	Act	0.518637	0.747634	0
lhx2b	M05219_2.00	chr6:33194095-33194595	adcyap1r1a	0.148922	Inter	0.609079	lhx2b->chr6:33194095-33194595->adcyap1r1a	Act	0.275906	0.747634	0
vax2	M05219_2.00	chr6:33194095-33194595	adcyap1r1a	0.077806	Inter	0.411513	vax2->chr6:33194095-33194595->adcyap1r1a	Act	0.459159	0.747634	0
rarga	M04484	chr8:38081343-38081843	adgra2	0.0956822	Body	0.509872	rarga->chr8:38081343-38081843->adgra2	Act	0.281721	0.278184	0
rorb	M08782	chr8:38081343-38081843	adgra2	0.178997	Body	0.237591	rorb->chr8:38081343-38081843->adgra2	Act	0.518637	0.278184	0
rarab	M10044	chr8:38081343-38081843	adgra2	0.0841343	Body	0.593606	rarab->chr8:38081343-38081843->adgra2	Act	0.271116	0.278184	0
sox13	M03487_2.00	chr8:38081343-38081843	adgra2	0.14668	Body	0.641141	sox13->chr8:38081343-38081843->adgra2	Act	0.295973	0.278184	0
tcf7l2	M09638_2.00	chr8:38128779-38129279	adgra2	0.215026	Body	0.530601	tcf7l2->chr8:38128779-38129279->adgra2	Act	0.32183	0.278184	0
lhx2b	M03202_2.00	chr8:38131359-38131859	adgra2	0.0506512	Body	0.634713	lhx2b->chr8:38131359-38131859->adgra2	Act	0.275906	0.278184	0
gli2a	M08023_2.00	chr8:38131359-38131859	adgra2	0.061166	Body	0.731421	gli2a->chr8:38131359-38131859->adgra2	Act	0.398694	0.278184	0
sox13	M08042_2.00	chr8:38131359-38131859	adgra2	0.210238	Body	0.641141	sox13->chr8:38131359-38131859->adgra2	Act	0.295973	0.278184	0
rarga	M09612_2.00	chr8:38131359-38131859	adgra2	0.128513	Body	0.509872	rarga->chr8:38131359-38131859->adgra2	Act	0.281721	0.278184	0
rorb	M09612_2.00	chr8:38131359-38131859	adgra2	0.175628	Body	0.237591	rorb->chr8:38131359-38131859->adgra2	Act	0.518637	0.278184	0
mef2aa	M05552_2.00	chr8:38137645-38138145	adgra2	0.0868944	Body	0.363975	mef2aa->chr8:38137645-38138145->adgra2	Act	0.308083	0.278184	0
sox13	M03969_2.00	chr8:38138158-38138658	adgra2	0.340108	Body	0.641141	sox13->chr8:38138158-38138658->adgra2	Act	0.295973	0.278184	0
lhx2b	M05197_2.00	chr8:38138158-38138658	adgra2	0.289592	Body	0.634713	lhx2b->chr8:38138158-38138658->adgra2	Act	0.275906	0.278184	0
mef2aa	M05552_2.00	chr8:38138158-38138658	adgra2	0.0868944	Body	0.363975	mef2aa->chr8:38138158-38138658->adgra2	Act	0.308083	0.278184	0
rorb	M05876_2.00	chr8:38138158-38138658	adgra2	0.0984448	Body	0.237591	rorb->chr8:38138158-38138658->adgra2	Act	0.518637	0.278184	0
rorb	M00184_2.00	chr8:38142926-38143426	adgra2	0.0869793	Body	0.237591	rorb->chr8:38142926-38143426->adgra2	Act	0.518637	0.278184	0
rarga	M02388_2.00	chr8:38142926-38143426	adgra2	0.129197	Body	0.509872	rarga->chr8:38142926-38143426->adgra2	Act	0.281721	0.278184	0
sox13	M03487_2.00	chr8:38142926-38143426	adgra2	0.14668	Body	0.641141	sox13->chr8:38142926-38143426->adgra2	Act	0.295973	0.278184	0
rarab	M06427_2.00	chr8:38142926-38143426	adgra2	0.0577549	Body	0.593606	rarab->chr8:38142926-38143426->adgra2	Act	0.271116	0.278184	0
rarga	M00181_2.00	chr8:38178145-38178645	adgra2	0.0815959	Inter	0.509872	rarga->chr8:38178145-38178645->adgra2	Act	0.281721	0.278184	0
rorb	M00181_2.00	chr8:38178145-38178645	adgra2	0.1411	Inter	0.237591	rorb->chr8:38178145-38178645->adgra2	Act	0.518637	0.278184	0
sox13	M03976_2.00	chr8:38178145-38178645	adgra2	0.361534	Inter	0.641141	sox13->chr8:38178145-38178645->adgra2	Act	0.295973	0.278184	0
rarab	M05592_2.00	chr8:38178145-38178645	adgra2	0.0611507	Inter	0.593606	rarab->chr8:38178145-38178645->adgra2	Act	0.271116	0.278184	0
mef2aa	M09597_2.00	chr8:38178145-38178645	adgra2	0.0527472	Inter	0.363975	mef2aa->chr8:38178145-38178645->adgra2	Act	0.308083	0.278184	0
tcf7l1a	M00805	chr13:24952614-24953114	adka	0.230037	Body	0.314671	tcf7l1a->chr13:24952614-24953114->adka	Act	0.287814	0.2609	0
e2f3	M08107_2.00	chr13:24952614-24953114	adka	0.193029	Body	0.269458	e2f3->chr13:24952614-24953114->adka	Act	0.374128	0.2609	0
e2f3	M00918	chr13:25046217-25046717	adka	0.14672	Body	0.269458	e2f3->chr13:25046217-25046717->adka	Act	0.374128	0.2609	0
vezf1a	M10107	chr13:25046217-25046717	adka	0.377438	Body	0.357572	vezf1a->chr13:25046217-25046717->adka	Act	0.393767	0.2609	0
vezf1a	M06815	chr13:25081954-25082454	adka	0.1712	Body	0.357572	vezf1a->chr13:25081954-25082454->adka	Act	0.393767	0.2609	0
e2f3	M07083	chr13:25081954-25082454	adka	0.179696	Body	0.269458	e2f3->chr13:25081954-25082454->adka	Act	0.374128	0.2609	0
e2f3	M09043_2.00	chr13:25166297-25166797	adka	0.222469	Body	0.269458	e2f3->chr13:25166297-25166797->adka	Act	0.374128	0.2609	0
myb	M07299	chr13:25170806-25171306	adka	0.139636	Body	0.367045	myb->chr13:25170806-25171306->adka	Act	0.268851	0.2609	0
tcf7l1a	M00198_2.00	chr13:25170806-25171306	adka	0.0618615	Body	0.314671	tcf7l1a->chr13:25170806-25171306->adka	Act	0.287814	0.2609	0
tcf7l1b	M00198_2.00	chr13:25170806-25171306	adka	0.0840065	Body	0.277883	tcf7l1b->chr13:25170806-25171306->adka	Act	0.390873	0.2609	0
tead1a	M04141	chr13:25198983-25199483	adka	0.321624	Body	0.299602	tead1a->chr13:25198983-25199483->adka	Act	0.371967	0.2609	0
myb	M00183	chr13:25446075-25446575	adka	0.0511148	Inter	0.367045	myb->chr13:25446075-25446575->adka	Act	0.268851	0.2609	0
tead1a	M04141	chr13:25198443-25198943	adka	0.321624	TSS	0.299602	tead1a->chr13:25198443-25198943->adka	Act	0.371967	0.2609	2.35665
e2f3	M07083	chr13:25199557-25200057	adka	0.179696	TSS	0.269458	e2f3->chr13:25199557-25200057->adka	Act	0.374128	0.2609	0
tead1a	M03995_2.00	chr13:25199557-25200057	adka	0.334726	TSS	0.299602	tead1a->chr13:25199557-25200057->adka	Act	0.371967	0.2609	0
rorb	M09291_2.00	chr10:2806882-2807382	aebp1	0.276632	Body	0.040962	rorb->chr10:2806882-2807382->aebp1	Act	0.518637	0.332045	2.70733
ar	M00962	chr10:2563495-2563995	aebp1	0.28152	Inter	0.245094	ar->chr10:2563495-2563995->aebp1	Act	0.456809	0.332045	0
lhx2b	M04386	chr10:2563495-2563995	aebp1	0.0522425	Inter	0.219732	lhx2b->chr10:2563495-2563995->aebp1	Act	0.275906	0.332045	0
sox13	M03498_2.00	chr10:2563495-2563995	aebp1	0.228254	Inter	0.211324	sox13->chr10:2563495-2563995->aebp1	Act	0.295973	0.332045	0
sox13	M00070_2.00	chr10:2994515-2995015	aebp1	0.177426	Inter	0.211324	sox13->chr10:2994515-2995015->aebp1	Act	0.295973	0.332045	0
rarab	M09278_2.00	chr10:2994515-2995015	aebp1	0.10023	Inter	0.220725	rarab->chr10:2994515-2995015->aebp1	Act	0.271116	0.332045	0
rorb	M09278_2.00	chr10:2994515-2995015	aebp1	0.275942	Inter	0.040962	rorb->chr10:2994515-2995015->aebp1	Act	0.518637	0.332045	0
rarab	M09276_2.00	chr10:2807549-2808049	aebp1	0.367431	TSS	0.220725	rarab->chr10:2807549-2808049->aebp1	Act	0.271116	0.332045	0
rorb	M09276_2.00	chr10:2807549-2808049	aebp1	0.524613	TSS	0.040962	rorb->chr10:2807549-2808049->aebp1	Act	0.518637	0.332045	0
foxo1a	M08304	chr20:43172749-43173249	afdna	0.0715894	Body	0.304487	foxo1a->chr20:43172749-43173249->afdna	Act	0.378908	0.359069	0
rxraa	M02388_2.00	chr20:43172749-43173249	afdna	0.13055	Body	0.236444	rxraa->chr20:43172749-43173249->afdna	Act	0.560488	0.359069	0
sox13	M03495_2.00	chr20:43172749-43173249	afdna	0.211616	Body	0.301853	sox13->chr20:43172749-43173249->afdna	Act	0.295973	0.359069	0
sox13	M05751_2.00	chr20:43319723-43320223	afdna	0.590074	Body	0.301853	sox13->chr20:43319723-43320223->afdna	Act	0.295973	0.359069	0
rxraa	M09833	chr20:43329691-43330191	afdna	0.26616	Body	0.236444	rxraa->chr20:43329691-43330191->afdna	Act	0.560488	0.359069	0
sox13	M03498_2.00	chr20:43329691-43330191	afdna	0.228254	Body	0.301853	sox13->chr20:43329691-43330191->afdna	Act	0.295973	0.359069	0
foxo1a	M01216	chr20:43370290-43370790	afdna	0.3512	Inter	0.304487	foxo1a->chr20:43370290-43370790->afdna	Act	0.378908	0.359069	0
rxraa	M05677_2.00	chr20:43370290-43370790	afdna	0.0645799	Inter	0.236444	rxraa->chr20:43370290-43370790->afdna	Act	0.560488	0.359069	0
sox13	M05751_2.00	chr20:43370290-43370790	afdna	0.590074	Inter	0.301853	sox13->chr20:43370290-43370790->afdna	Act	0.295973	0.359069	0
gli2a	M07455	chr20:43345811-43346311	afdna	0.132432	TSS	0.384449	gli2a->chr20:43345811-43346311->afdna	Act	0.398694	0.359069	0
sox13	M05759_2.00	chr20:43345811-43346311	afdna	0.445289	TSS	0.301853	sox13->chr20:43345811-43346311->afdna	Act	0.295973	0.359069	0
rxraa	M06412_2.00	chr20:43345811-43346311	afdna	0.240607	TSS	0.236444	rxraa->chr20:43345811-43346311->afdna	Act	0.560488	0.359069	0
rorb	M08782	chr24:34146345-34146845	agap3	0.178997	Body	0.484466	rorb->chr24:34146345-34146845->agap3	Act	0.518637	0.297528	0
rxraa	M00181_2.00	chr24:34146345-34146845	agap3	0.0731955	Body	0.437319	rxraa->chr24:34146345-34146845->agap3	Act	0.560488	0.297528	0
rarab	M03391_2.00	chr24:34146345-34146845	agap3	0.0695662	Body	0.385775	rarab->chr24:34146345-34146845->agap3	Act	0.271116	0.297528	0
ar	M07986_2.00	chr24:34146345-34146845	agap3	0.304091	Body	0.383994	ar->chr24:34146345-34146845->agap3	Act	0.456809	0.297528	0
nr3c2	M07986_2.00	chr24:34146345-34146845	agap3	0.279897	Body	0.370859	nr3c2->chr24:34146345-34146845->agap3	Act	0.390207	0.297528	0
sox13	M09389_2.00	chr24:34146345-34146845	agap3	0.62294	Body	0.524486	sox13->chr24:34146345-34146845->agap3	Act	0.295973	0.297528	0
gli2a	M01703	chr24:34160093-34160593	agap3	0.15947	Body	0.581078	gli2a->chr24:34160093-34160593->agap3	Act	0.398694	0.297528	0
rxraa	M03788	chr24:34160093-34160593	agap3	0.155488	Body	0.437319	rxraa->chr24:34160093-34160593->agap3	Act	0.560488	0.297528	0
lhx2b	M03853_2.00	chr24:34160093-34160593	agap3	0.220598	Body	0.408859	lhx2b->chr24:34160093-34160593->agap3	Act	0.275906	0.297528	0
sox13	M09388_2.00	chr24:34160093-34160593	agap3	0.582094	Body	0.524486	sox13->chr24:34160093-34160593->agap3	Act	0.295973	0.297528	0
tcf7l1b	M09400_2.00	chr24:34160093-34160593	agap3	0.442143	Body	0.418269	tcf7l1b->chr24:34160093-34160593->agap3	Act	0.390873	0.297528	0
tcf7l2	M09400_2.00	chr24:34160093-34160593	agap3	0.523976	Body	0.418224	tcf7l2->chr24:34160093-34160593->agap3	Act	0.32183	0.297528	0
ar	M09609_2.00	chr24:34160093-34160593	agap3	0.137554	Body	0.383994	ar->chr24:34160093-34160593->agap3	Act	0.456809	0.297528	0
nr3c2	M09609_2.00	chr24:34160093-34160593	agap3	0.0919	Body	0.370859	nr3c2->chr24:34160093-34160593->agap3	Act	0.390207	0.297528	0
rarab	M11148_2.00	chr24:34160093-34160593	agap3	0.0527853	Body	0.385775	rarab->chr24:34160093-34160593->agap3	Act	0.271116	0.297528	0
rxraa	M04787	chr24:34310170-34310670	agap3	0.0608	Body	0.437319	rxraa->chr24:34310170-34310670->agap3	Act	0.560488	0.297528	0
sox13	M03484_2.00	chr24:34310170-34310670	agap3	0.154662	Body	0.524486	sox13->chr24:34310170-34310670->agap3	Act	0.295973	0.297528	0
lhx2b	M03865_2.00	chr24:34310170-34310670	agap3	0.202786	Body	0.408859	lhx2b->chr24:34310170-34310670->agap3	Act	0.275906	0.297528	0
fosl2	M07827_2.00	chr24:34310170-34310670	agap3	0.58101	Body	0.255057	fosl2->chr24:34310170-34310670->agap3	Act	0.273506	0.297528	0
rorb	M11139_2.00	chr24:34310170-34310670	agap3	0.10273	Body	0.484466	rorb->chr24:34310170-34310670->agap3	Act	0.518637	0.297528	0
rxraa	M00647	chr24:34310680-34311180	agap3	0.0660954	Body	0.437319	rxraa->chr24:34310680-34311180->agap3	Act	0.560488	0.297528	0
rorb	M00818_2.00	chr24:34310680-34311180	agap3	0.112632	Body	0.484466	rorb->chr24:34310680-34311180->agap3	Act	0.518637	0.297528	0
rarab	M03392_2.00	chr24:34310680-34311180	agap3	0.0568546	Body	0.385775	rarab->chr24:34310680-34311180->agap3	Act	0.271116	0.297528	0
lhx2b	M03865_2.00	chr24:34310680-34311180	agap3	0.202786	Body	0.408859	lhx2b->chr24:34310680-34311180->agap3	Act	0.275906	0.297528	0
fosl2	M04335_2.00	chr24:34310680-34311180	agap3	0.138066	Body	0.255057	fosl2->chr24:34310680-34311180->agap3	Act	0.273506	0.297528	0
sox13	M05761_2.00	chr24:34310680-34311180	agap3	0.598078	Body	0.524486	sox13->chr24:34310680-34311180->agap3	Act	0.295973	0.297528	0
rxraa	M00512	chr24:34315813-34316313	agap3	0.0638808	Body	0.437319	rxraa->chr24:34315813-34316313->agap3	Act	0.560488	0.297528	0
lhx2b	M04386	chr24:34315813-34316313	agap3	0.0522425	Body	0.408859	lhx2b->chr24:34315813-34316313->agap3	Act	0.275906	0.297528	0
ar	M08189	chr24:34315813-34316313	agap3	0.387419	Body	0.383994	ar->chr24:34315813-34316313->agap3	Act	0.456809	0.297528	0
epas1b	M09906	chr24:34315813-34316313	agap3	0.116161	Body	0.531642	epas1b->chr24:34315813-34316313->agap3	Act	0.470616	0.297528	0
rorb	M11138_2.00	chr24:34315813-34316313	agap3	0.0792534	Body	0.484466	rorb->chr24:34315813-34316313->agap3	Act	0.518637	0.297528	0
ar	M00447	chr24:34333257-34333757	agap3	0.204659	Body	0.383994	ar->chr24:34333257-34333757->agap3	Act	0.456809	0.297528	0
rorb	M05616_2.00	chr24:34333257-34333757	agap3	0.0504807	Body	0.484466	rorb->chr24:34333257-34333757->agap3	Act	0.518637	0.297528	0
gli2a	M01037	chr24:34115179-34115679	agap3	0.0839593	Inter	0.581078	gli2a->chr24:34115179-34115679->agap3	Act	0.398694	0.297528	1.31163
tcf7l2	M04775	chr24:34115179-34115679	agap3	0.188685	Inter	0.418224	tcf7l2->chr24:34115179-34115679->agap3	Act	0.32183	0.297528	1.31163
rorb	M02397_2.00	chr24:34115179-34115679	agap3	0.0917707	Inter	0.484466	rorb->chr24:34115179-34115679->agap3	Act	0.518637	0.297528	1.31163
tcf7l1b	M02646_2.00	chr24:34115179-34115679	agap3	0.0769694	Inter	0.418269	tcf7l1b->chr24:34115179-34115679->agap3	Act	0.390873	0.297528	1.31163
rarab	M06427_2.00	chr24:34115179-34115679	agap3	0.0577549	Inter	0.385775	rarab->chr24:34115179-34115679->agap3	Act	0.271116	0.297528	1.31163
rxraa	M06427_2.00	chr24:34115179-34115679	agap3	0.170477	Inter	0.437319	rxraa->chr24:34115179-34115679->agap3	Act	0.560488	0.297528	1.31163
fosl2	M08914	chr24:34128983-34129483	agap3	0.579759	Inter	0.255057	fosl2->chr24:34128983-34129483->agap3	Act	0.273506	0.297528	0
vezf1a	M10107	chr24:34128983-34129483	agap3	0.377438	Inter	0.204036	vezf1a->chr24:34128983-34129483->agap3	Act	0.393767	0.297528	0
lhx2b	M05040_2.00	chr24:34128983-34129483	agap3	0.27414	Inter	0.408859	lhx2b->chr24:34128983-34129483->agap3	Act	0.275906	0.297528	0
gli2a	M01037	chr24:34336320-34336820	agap3	0.0839593	Inter	0.581078	gli2a->chr24:34336320-34336820->agap3	Act	0.398694	0.297528	0
rxraa	M02262	chr24:34336320-34336820	agap3	0.12773	Inter	0.437319	rxraa->chr24:34336320-34336820->agap3	Act	0.560488	0.297528	0
lhx2b	M07047	chr24:34336320-34336820	agap3	0.193645	Inter	0.408859	lhx2b->chr24:34336320-34336820->agap3	Act	0.275906	0.297528	0
ascl1a	M09767	chr24:34336320-34336820	agap3	0.0571486	Inter	0.0758219	ascl1a->chr24:34336320-34336820->agap3	Act	0.349897	0.297528	0
rarab	M03394_2.00	chr24:34336320-34336820	agap3	0.0649601	Inter	0.385775	rarab->chr24:34336320-34336820->agap3	Act	0.271116	0.297528	0
rorb	M03394_2.00	chr24:34336320-34336820	agap3	0.115117	Inter	0.484466	rorb->chr24:34336320-34336820->agap3	Act	0.518637	0.297528	0
sox13	M03487_2.00	chr24:34336320-34336820	agap3	0.14668	Inter	0.524486	sox13->chr24:34336320-34336820->agap3	Act	0.295973	0.297528	0
lhx2b	M07047	chr24:34348533-34349033	agap3	0.193645	Inter	0.408859	lhx2b->chr24:34348533-34349033->agap3	Act	0.275906	0.297528	0
ar	M08189	chr24:34348533-34349033	agap3	0.387419	Inter	0.383994	ar->chr24:34348533-34349033->agap3	Act	0.456809	0.297528	0
sox13	M03487_2.00	chr24:34348533-34349033	agap3	0.14668	Inter	0.524486	sox13->chr24:34348533-34349033->agap3	Act	0.295973	0.297528	0
fosl2	M00925	chr24:34351366-34351866	agap3	0.55321	Inter	0.255057	fosl2->chr24:34351366-34351866->agap3	Act	0.273506	0.297528	0
rxraa	M04787	chr24:34351366-34351866	agap3	0.0608	Inter	0.437319	rxraa->chr24:34351366-34351866->agap3	Act	0.560488	0.297528	0
sox13	M00214_2.00	chr24:34351366-34351866	agap3	0.102777	Inter	0.524486	sox13->chr24:34351366-34351866->agap3	Act	0.295973	0.297528	0
lhx2b	M06277_2.00	chr24:34351366-34351866	agap3	0.0501803	Inter	0.408859	lhx2b->chr24:34351366-34351866->agap3	Act	0.275906	0.297528	0
lhx2b	M07047	chr24:34354092-34354592	agap3	0.193645	Inter	0.408859	lhx2b->chr24:34354092-34354592->agap3	Act	0.275906	0.297528	0
ascl1a	M09767	chr24:34354092-34354592	agap3	0.0571486	Inter	0.0758219	ascl1a->chr24:34354092-34354592->agap3	Act	0.349897	0.297528	0
tcf7l1b	M08428_2.00	chr24:34354092-34354592	agap3	0.145376	Inter	0.418269	tcf7l1b->chr24:34354092-34354592->agap3	Act	0.390873	0.297528	0
tcf7l2	M08428_2.00	chr24:34354092-34354592	agap3	0.210262	Inter	0.418224	tcf7l2->chr24:34354092-34354592->agap3	Act	0.32183	0.297528	0
ar	M00962	chr24:34334315-34334815	agap3	0.28152	TSS	0.383994	ar->chr24:34334315-34334815->agap3	Act	0.456809	0.297528	1.7432
gli2a	M01037	chr24:34334315-34334815	agap3	0.0839593	TSS	0.581078	gli2a->chr24:34334315-34334815->agap3	Act	0.398694	0.297528	1.7432
rarab	M02787	chr24:34334315-34334815	agap3	0.0506533	TSS	0.385775	rarab->chr24:34334315-34334815->agap3	Act	0.271116	0.297528	1.7432
rxraa	M07125	chr24:34334315-34334815	agap3	0.17073	TSS	0.437319	rxraa->chr24:34334315-34334815->agap3	Act	0.560488	0.297528	1.7432
rorb	M00181_2.00	chr24:34334315-34334815	agap3	0.1411	TSS	0.484466	rorb->chr24:34334315-34334815->agap3	Act	0.518637	0.297528	1.7432
rxraa	M01153	chr24:34335436-34335936	agap3	0.199716	TSS	0.437319	rxraa->chr24:34335436-34335936->agap3	Act	0.560488	0.297528	0
ascl1a	M09767	chr24:34335436-34335936	agap3	0.0571486	TSS	0.0758219	ascl1a->chr24:34335436-34335936->agap3	Act	0.349897	0.297528	0
rarab	M10044	chr24:34335436-34335936	agap3	0.0841343	TSS	0.385775	rarab->chr24:34335436-34335936->agap3	Act	0.271116	0.297528	0
vezf1a	M10107	chr24:34335436-34335936	agap3	0.377438	TSS	0.204036	vezf1a->chr24:34335436-34335936->agap3	Act	0.393767	0.297528	0
rorb	M09277_2.00	chr24:34335436-34335936	agap3	0.158295	TSS	0.484466	rorb->chr24:34335436-34335936->agap3	Act	0.518637	0.297528	0
fosl2	M07826_2.00	chr8:15807906-15808406	agbl4	0.58291	Body	0.0415256	fosl2->chr8:15807906-15808406->agbl4	Act	0.273506	0.491261	0
tcf7l1a	M00805	chr8:15991283-15991783	agbl4	0.230037	TSS	0.102986	tcf7l1a->chr8:15991283-15991783->agbl4	Act	0.287814	0.491261	0
rorb	M01722	chr20:4962670-4963170	ak7a	0.411551	Inter	0.189657	rorb->chr20:4962670-4963170->ak7a	Act	0.518637	0.291049	2.22592
sox13	M02718_2.00	chr20:4962670-4963170	ak7a	0.363546	Inter	0.24212	sox13->chr20:4962670-4963170->ak7a	Act	0.295973	0.291049	2.22592
tcf7l1a	M00805	chr20:4975494-4975994	ak7a	0.230037	Inter	0.197318	tcf7l1a->chr20:4975494-4975994->ak7a	Act	0.287814	0.291049	0
tcf7l1a	M00805	chr13:11252215-11252715	akt3a	0.230037	Body	0.438981	tcf7l1a->chr13:11252215-11252715->akt3a	Act	0.287814	0.424266	0
vezf1a	M10107	chr13:11252215-11252715	akt3a	0.377438	Body	0.318024	vezf1a->chr13:11252215-11252715->akt3a	Act	0.393767	0.424266	0
sox13	M00070_2.00	chr13:11252215-11252715	akt3a	0.177426	Body	0.419258	sox13->chr13:11252215-11252715->akt3a	Act	0.295973	0.424266	0
nr3c2	M09270_2.00	chr13:11252215-11252715	akt3a	0.312701	Body	0.389394	nr3c2->chr13:11252215-11252715->akt3a	Act	0.390207	0.424266	0
rorb	M09280_2.00	chr13:11252215-11252715	akt3a	0.0834084	Body	0.399047	rorb->chr13:11252215-11252715->akt3a	Act	0.518637	0.424266	0
tcf7l1a	M00805	chr13:11257793-11258293	akt3a	0.230037	Body	0.438981	tcf7l1a->chr13:11257793-11258293->akt3a	Act	0.287814	0.424266	0
tcf7l1b	M04005	chr13:11257793-11258293	akt3a	0.158168	Body	0.434948	tcf7l1b->chr13:11257793-11258293->akt3a	Act	0.390873	0.424266	0
tcf7l2	M04775	chr13:11257793-11258293	akt3a	0.188685	Body	0.401703	tcf7l2->chr13:11257793-11258293->akt3a	Act	0.32183	0.424266	0
gli2a	M08023_2.00	chr13:11257793-11258293	akt3a	0.061166	Body	0.482964	gli2a->chr13:11257793-11258293->akt3a	Act	0.398694	0.424266	0
rfx2	M09628_2.00	chr13:11257793-11258293	akt3a	0.38374	Body	0.394351	rfx2->chr13:11257793-11258293->akt3a	Act	0.396514	0.424266	0
foxo1a	M07094	chr13:11259493-11259993	akt3a	0.0631126	Body	0.466383	foxo1a->chr13:11259493-11259993->akt3a	Act	0.378908	0.424266	0
rfx2	M00066_2.00	chr13:11259493-11259993	akt3a	0.13073	Body	0.394351	rfx2->chr13:11259493-11259993->akt3a	Act	0.396514	0.424266	0
sox13	M03513_2.00	chr13:11259493-11259993	akt3a	0.141073	Body	0.419258	sox13->chr13:11259493-11259993->akt3a	Act	0.295973	0.424266	0
gli2a	M08023_2.00	chr13:11259493-11259993	akt3a	0.061166	Body	0.482964	gli2a->chr13:11259493-11259993->akt3a	Act	0.398694	0.424266	0
foxo1a	M03823	chr13:11268448-11268948	akt3a	0.456812	Body	0.466383	foxo1a->chr13:11268448-11268948->akt3a	Act	0.378908	0.424266	0
sox13	M08899	chr13:11268448-11268948	akt3a	0.431399	Body	0.419258	sox13->chr13:11268448-11268948->akt3a	Act	0.295973	0.424266	0
foxn3	M04835_2.00	chr13:11268448-11268948	akt3a	0.0695225	Body	0.416603	foxn3->chr13:11268448-11268948->akt3a	Act	0.454143	0.424266	0
klf12b	M08857_2.00	chr13:11350146-11350646	akt3a	0.0584093	Body	0.22199	klf12b->chr13:11350146-11350646->akt3a	Act	0.342959	0.424266	0
erfl3	M09055_2.00	chr13:11350146-11350646	akt3a	0.378177	Body	0.372616	erfl3->chr13:11350146-11350646->akt3a	Act	0.412952	0.424266	0
nr3c2	M09609_2.00	chr13:11350146-11350646	akt3a	0.0919	Body	0.389394	nr3c2->chr13:11350146-11350646->akt3a	Act	0.390207	0.424266	0
sox13	M01014	chr13:11353185-11353685	akt3a	0.382335	Body	0.419258	sox13->chr13:11353185-11353685->akt3a	Act	0.295973	0.424266	0
tcf7l1a	M01594	chr13:11353185-11353685	akt3a	0.313715	Body	0.438981	tcf7l1a->chr13:11353185-11353685->akt3a	Act	0.287814	0.424266	0
foxo1a	M03823	chr13:11353185-11353685	akt3a	0.456812	Body	0.466383	foxo1a->chr13:11353185-11353685->akt3a	Act	0.378908	0.424266	0
tcf7l1b	M00712_2.00	chr13:11353185-11353685	akt3a	0.313419	Body	0.434948	tcf7l1b->chr13:11353185-11353685->akt3a	Act	0.390873	0.424266	0
tcf7l2	M00712_2.00	chr13:11353185-11353685	akt3a	0.358468	Body	0.401703	tcf7l2->chr13:11353185-11353685->akt3a	Act	0.32183	0.424266	0
erfl3	M01477_2.00	chr13:11353185-11353685	akt3a	0.0654332	Body	0.372616	erfl3->chr13:11353185-11353685->akt3a	Act	0.412952	0.424266	0
tead1a	M08175_2.00	chr13:11353185-11353685	akt3a	0.373477	Body	0.378647	tead1a->chr13:11353185-11353685->akt3a	Act	0.371967	0.424266	0
rorb	M09317_2.00	chr13:11353185-11353685	akt3a	0.202375	Body	0.399047	rorb->chr13:11353185-11353685->akt3a	Act	0.518637	0.424266	0
nfixa	M00056	chr13:11353851-11354351	akt3a	0.0745108	Body	0.368769	nfixa->chr13:11353851-11354351->akt3a	Act	0.512419	0.424266	0
tcf7l1a	M01594	chr13:11353851-11354351	akt3a	0.313715	Body	0.438981	tcf7l1a->chr13:11353851-11354351->akt3a	Act	0.287814	0.424266	0
foxo1a	M03823	chr13:11353851-11354351	akt3a	0.456812	Body	0.466383	foxo1a->chr13:11353851-11354351->akt3a	Act	0.378908	0.424266	0
rfx2	M10355	chr13:11353851-11354351	akt3a	0.35036	Body	0.394351	rfx2->chr13:11353851-11354351->akt3a	Act	0.396514	0.424266	0
rorb	M00184_2.00	chr13:11353851-11354351	akt3a	0.0869793	Body	0.399047	rorb->chr13:11353851-11354351->akt3a	Act	0.518637	0.424266	0
tcf7l1b	M00712_2.00	chr13:11353851-11354351	akt3a	0.313419	Body	0.434948	tcf7l1b->chr13:11353851-11354351->akt3a	Act	0.390873	0.424266	0
tcf7l2	M00712_2.00	chr13:11353851-11354351	akt3a	0.358468	Body	0.401703	tcf7l2->chr13:11353851-11354351->akt3a	Act	0.32183	0.424266	0
erfl3	M01477_2.00	chr13:11353851-11354351	akt3a	0.0654332	Body	0.372616	erfl3->chr13:11353851-11354351->akt3a	Act	0.412952	0.424266	0
fosl2	M04036_2.00	chr13:11353851-11354351	akt3a	0.237779	Body	0.429082	fosl2->chr13:11353851-11354351->akt3a	Act	0.273506	0.424266	0
sox13	M05893_2.00	chr13:11353851-11354351	akt3a	0.418904	Body	0.419258	sox13->chr13:11353851-11354351->akt3a	Act	0.295973	0.424266	0
tcf7l1a	M00805	chr13:11360004-11360504	akt3a	0.230037	Body	0.438981	tcf7l1a->chr13:11360004-11360504->akt3a	Act	0.287814	0.424266	0
vezf1a	M10107	chr13:11360004-11360504	akt3a	0.377438	Body	0.318024	vezf1a->chr13:11360004-11360504->akt3a	Act	0.393767	0.424266	0
rorb	M09291_2.00	chr13:11360004-11360504	akt3a	0.276632	Body	0.399047	rorb->chr13:11360004-11360504->akt3a	Act	0.518637	0.424266	0
rfx2	M11247_2.00	chr13:11360004-11360504	akt3a	0.332572	Body	0.394351	rfx2->chr13:11360004-11360504->akt3a	Act	0.396514	0.424266	0
vezf1a	M10107	chr13:11360515-11361015	akt3a	0.377438	Body	0.318024	vezf1a->chr13:11360515-11361015->akt3a	Act	0.393767	0.424266	0
fosl2	M00925	chr13:11364614-11365114	akt3a	0.55321	Body	0.429082	fosl2->chr13:11364614-11365114->akt3a	Act	0.273506	0.424266	0
erfl3	M09061_2.00	chr13:11364614-11365114	akt3a	0.179517	Body	0.372616	erfl3->chr13:11364614-11365114->akt3a	Act	0.412952	0.424266	0
rorb	M09278_2.00	chr13:11364614-11365114	akt3a	0.275942	Body	0.399047	rorb->chr13:11364614-11365114->akt3a	Act	0.518637	0.424266	0
vezf1a	M06815	chr13:11146064-11146564	akt3a	0.1712	Inter	0.318024	vezf1a->chr13:11146064-11146564->akt3a	Act	0.393767	0.424266	0
zic2b	M02893_2.00	chr13:11146064-11146564	akt3a	0.211074	Inter	0.358046	zic2b->chr13:11146064-11146564->akt3a	Act	0.256339	0.424266	0
foxo1a	M04257	chr13:11377303-11377803	akt3a	0.133348	TSS	0.466383	foxo1a->chr13:11377303-11377803->akt3a	Act	0.378908	0.424266	0
sox13	M09389_2.00	chr13:11377303-11377803	akt3a	0.62294	TSS	0.419258	sox13->chr13:11377303-11377803->akt3a	Act	0.295973	0.424266	0
nr3c2	M09318_2.00	chr23:22797122-22797622	AL928977.1	0.283493	Inter	0.0352552	nr3c2->chr23:22797122-22797622->AL928977.1	Act	0.390207	0.347628	0
vezf1a	M10107	chr23:22812488-22812988	AL928977.1	0.377438	Inter	0.0975115	vezf1a->chr23:22812488-22812988->AL928977.1	Act	0.393767	0.347628	0
rorb	M09689_2.00	chr23:22812488-22812988	AL928977.1	0.378732	Inter	0.124195	rorb->chr23:22812488-22812988->AL928977.1	Act	0.518637	0.347628	0
zic2b	M00137_2.00	chr23:22917725-22918225	AL928977.1	0.163334	Inter	0.146046	zic2b->chr23:22917725-22918225->AL928977.1	Act	0.256339	0.347628	0
fosl2	M04335_2.00	chr23:22917725-22918225	AL928977.1	0.138066	Inter	0.112766	fosl2->chr23:22917725-22918225->AL928977.1	Act	0.273506	0.347628	0
onecut1	M00639	chr23:22964920-22965420	AL928977.1	0.0921288	Inter	0.128993	onecut1->chr23:22964920-22965420->AL928977.1	Act	0.261755	0.347628	0
vezf1a	M10107	chr23:22964920-22965420	AL928977.1	0.377438	Inter	0.0975115	vezf1a->chr23:22964920-22965420->AL928977.1	Act	0.393767	0.347628	0
zic2b	M02894_2.00	chr23:22964920-22965420	AL928977.1	0.211149	Inter	0.146046	zic2b->chr23:22964920-22965420->AL928977.1	Act	0.256339	0.347628	0
rorb	M03375_2.00	chr23:22964920-22965420	AL928977.1	0.0683586	Inter	0.124195	rorb->chr23:22964920-22965420->AL928977.1	Act	0.518637	0.347628	0
onecut1	M00639	chr23:22965487-22965987	AL928977.1	0.0921288	Inter	0.128993	onecut1->chr23:22965487-22965987->AL928977.1	Act	0.261755	0.347628	0
vezf1a	M10107	chr23:22965487-22965987	AL928977.1	0.377438	Inter	0.0975115	vezf1a->chr23:22965487-22965987->AL928977.1	Act	0.393767	0.347628	0
zic2b	M02894_2.00	chr23:22965487-22965987	AL928977.1	0.211149	Inter	0.146046	zic2b->chr23:22965487-22965987->AL928977.1	Act	0.256339	0.347628	0
rorb	M09278_2.00	chr23:22965487-22965987	AL928977.1	0.275942	Inter	0.124195	rorb->chr23:22965487-22965987->AL928977.1	Act	0.518637	0.347628	0
vezf1a	M06815	chr23:22966017-22966517	AL928977.1	0.1712	Inter	0.0975115	vezf1a->chr23:22966017-22966517->AL928977.1	Act	0.393767	0.347628	0
gli2a	M04416_2.00	chr23:22966017-22966517	AL928977.1	0.0978134	Inter	0.109514	gli2a->chr23:22966017-22966517->AL928977.1	Act	0.398694	0.347628	0
nr3c2	M09609_2.00	chr23:22966017-22966517	AL928977.1	0.0919	Inter	0.0352552	nr3c2->chr23:22966017-22966517->AL928977.1	Act	0.390207	0.347628	0
fosl2	M00924	chr23:23017626-23018126	AL928977.1	0.565179	Inter	0.112766	fosl2->chr23:23017626-23018126->AL928977.1	Act	0.273506	0.347628	0
zic2b	M02893_2.00	chr23:23017626-23018126	AL928977.1	0.211074	Inter	0.146046	zic2b->chr23:23017626-23018126->AL928977.1	Act	0.256339	0.347628	0
rorb	M09277_2.00	chr23:23017626-23018126	AL928977.1	0.158295	Inter	0.124195	rorb->chr23:23017626-23018126->AL928977.1	Act	0.518637	0.347628	0
zic2b	M04491_2.00	chr23:23030982-23031482	AL928977.1	0.221103	Inter	0.146046	zic2b->chr23:23030982-23031482->AL928977.1	Act	0.256339	0.347628	0.468896
vezf1a	M10107	chr23:23036166-23036666	AL928977.1	0.377438	Inter	0.0975115	vezf1a->chr23:23036166-23036666->AL928977.1	Act	0.393767	0.347628	0
fosl2	M03870	chr23:23038398-23038898	AL928977.1	0.573182	Inter	0.112766	fosl2->chr23:23038398-23038898->AL928977.1	Act	0.273506	0.347628	0
rorb	M03376_2.00	chr23:23038398-23038898	AL928977.1	0.0542008	Inter	0.124195	rorb->chr23:23038398-23038898->AL928977.1	Act	0.518637	0.347628	0
vezf1a	M10107	chr23:23042849-23043349	AL928977.1	0.377438	Inter	0.0975115	vezf1a->chr23:23042849-23043349->AL928977.1	Act	0.393767	0.347628	0
fosl2	M04336_2.00	chr23:23042849-23043349	AL928977.1	0.553128	Inter	0.112766	fosl2->chr23:23042849-23043349->AL928977.1	Act	0.273506	0.347628	0
fosl2	M09616	chr23:23046006-23046506	AL928977.1	0.578578	Inter	0.112766	fosl2->chr23:23046006-23046506->AL928977.1	Act	0.273506	0.347628	0
rorb	M02709_2.00	chr23:23046006-23046506	AL928977.1	0.155681	Inter	0.124195	rorb->chr23:23046006-23046506->AL928977.1	Act	0.518637	0.347628	0
zic2b	M02836	chr23:23084120-23084620	AL928977.1	0.11199	Inter	0.146046	zic2b->chr23:23084120-23084620->AL928977.1	Act	0.256339	0.347628	0
foxn4	M04645	chr23:23084120-23084620	AL928977.1	0.102056	Inter	0.167755	foxn4->chr23:23084120-23084620->AL928977.1	Act	0.40659	0.347628	0
vezf1a	M10107	chr23:23084120-23084620	AL928977.1	0.377438	Inter	0.0975115	vezf1a->chr23:23084120-23084620->AL928977.1	Act	0.393767	0.347628	0
rorb	M05591_2.00	chr23:23084120-23084620	AL928977.1	0.0526257	Inter	0.124195	rorb->chr23:23084120-23084620->AL928977.1	Act	0.518637	0.347628	0
vezf1a	M10107	chr23:23107117-23107617	AL928977.1	0.377438	Inter	0.0975115	vezf1a->chr23:23107117-23107617->AL928977.1	Act	0.393767	0.347628	0
nr3c2	M09288_2.00	chr23:23107117-23107617	AL928977.1	0.248185	Inter	0.0352552	nr3c2->chr23:23107117-23107617->AL928977.1	Act	0.390207	0.347628	0
zic2b	M02940	chr23:23110904-23111404	AL928977.1	0.140495	Inter	0.146046	zic2b->chr23:23110904-23111404->AL928977.1	Act	0.256339	0.347628	0
gli2a	M07292	chr23:23110904-23111404	AL928977.1	0.122262	Inter	0.109514	gli2a->chr23:23110904-23111404->AL928977.1	Act	0.398694	0.347628	0
vezf1a	M10107	chr23:23110904-23111404	AL928977.1	0.377438	Inter	0.0975115	vezf1a->chr23:23110904-23111404->AL928977.1	Act	0.393767	0.347628	0
rorb	M08224_2.00	chr23:23110904-23111404	AL928977.1	0.0762164	Inter	0.124195	rorb->chr23:23110904-23111404->AL928977.1	Act	0.518637	0.347628	0
rorb	M05563_2.00	chr23:23114283-23114783	AL928977.1	0.064849	Inter	0.124195	rorb->chr23:23114283-23114783->AL928977.1	Act	0.518637	0.347628	0
vezf1a	M10107	chr23:23115676-23116176	AL928977.1	0.377438	Inter	0.0975115	vezf1a->chr23:23115676-23116176->AL928977.1	Act	0.393767	0.347628	0.447754
rorb	M02402_2.00	chr23:23115676-23116176	AL928977.1	0.0564565	Inter	0.124195	rorb->chr23:23115676-23116176->AL928977.1	Act	0.518637	0.347628	0.447754
vezf1a	M10107	chr23:23116680-23117180	AL928977.1	0.377438	Inter	0.0975115	vezf1a->chr23:23116680-23117180->AL928977.1	Act	0.393767	0.347628	0
zic2b	M00137_2.00	chr23:23116680-23117180	AL928977.1	0.163334	Inter	0.146046	zic2b->chr23:23116680-23117180->AL928977.1	Act	0.256339	0.347628	0
rorb	M03934_2.00	chr23:23116680-23117180	AL928977.1	0.0955536	Inter	0.124195	rorb->chr23:23116680-23117180->AL928977.1	Act	0.518637	0.347628	0
rorb	M06427_2.00	chr23:23123824-23124324	AL928977.1	0.181697	Inter	0.124195	rorb->chr23:23123824-23124324->AL928977.1	Act	0.518637	0.347628	0
nr3c2	M11120_2.00	chr23:23123824-23124324	AL928977.1	0.121069	Inter	0.0352552	nr3c2->chr23:23123824-23124324->AL928977.1	Act	0.390207	0.347628	0
vezf1a	M10107	chr23:23125794-23126294	AL928977.1	0.377438	Inter	0.0975115	vezf1a->chr23:23125794-23126294->AL928977.1	Act	0.393767	0.347628	0
fosl2	M04338_2.00	chr23:23125794-23126294	AL928977.1	0.134349	Inter	0.112766	fosl2->chr23:23125794-23126294->AL928977.1	Act	0.273506	0.347628	0
gli2a	M04402_2.00	chr23:23132885-23133385	AL928977.1	0.0887611	Inter	0.109514	gli2a->chr23:23132885-23133385->AL928977.1	Act	0.398694	0.347628	0
gli2a	M05331	chr21:37478349-37478849	amot	0.190092	Body	0.649511	gli2a->chr21:37478349-37478849->amot	Act	0.398694	0.4851	0
tcf7l2	M00198_2.00	chr21:37478349-37478849	amot	0.154676	Body	0.486325	tcf7l2->chr21:37478349-37478849->amot	Act	0.32183	0.4851	0
lhx2b	M03164_2.00	chr21:37478349-37478849	amot	0.148772	Body	0.561759	lhx2b->chr21:37478349-37478849->amot	Act	0.275906	0.4851	0
sox13	M03489_2.00	chr21:37478349-37478849	amot	0.167944	Body	0.595595	sox13->chr21:37478349-37478849->amot	Act	0.295973	0.4851	0
mef2aa	M05558_2.00	chr21:37478349-37478849	amot	0.0892581	Body	0.300322	mef2aa->chr21:37478349-37478849->amot	Act	0.308083	0.4851	0
klf12b	M08857_2.00	chr21:37478349-37478849	amot	0.0584093	Body	0.442056	klf12b->chr21:37478349-37478849->amot	Act	0.342959	0.4851	0
rarab	M09317_2.00	chr21:37478349-37478849	amot	0.081656	Body	0.511362	rarab->chr21:37478349-37478849->amot	Act	0.271116	0.4851	0
rarga	M09317_2.00	chr21:37478349-37478849	amot	0.136703	Body	0.473443	rarga->chr21:37478349-37478849->amot	Act	0.281721	0.4851	0
rxraa	M09317_2.00	chr21:37478349-37478849	amot	0.139168	Body	0.481415	rxraa->chr21:37478349-37478849->amot	Act	0.560488	0.4851	0
ar	M11120_2.00	chr21:37478349-37478849	amot	0.160941	Body	0.596479	ar->chr21:37478349-37478849->amot	Act	0.456809	0.4851	0
nr3c2	M11120_2.00	chr21:37478349-37478849	amot	0.121069	Body	0.476336	nr3c2->chr21:37478349-37478849->amot	Act	0.390207	0.4851	0
foxo1b	M01968	chr21:37492336-37492836	amot	0.0919402	Body	0.277255	foxo1b->chr21:37492336-37492836->amot	Act	0.272074	0.4851	0
lhx2b	M07047	chr21:37492336-37492836	amot	0.193645	Body	0.561759	lhx2b->chr21:37492336-37492836->amot	Act	0.275906	0.4851	0
sox13	M08899	chr21:37492336-37492836	amot	0.431399	Body	0.595595	sox13->chr21:37492336-37492836->amot	Act	0.295973	0.4851	0
ar	M07204	chr21:37509764-37510264	amot	0.317912	Body	0.596479	ar->chr21:37509764-37510264->amot	Act	0.456809	0.4851	0
gli2a	M02642_2.00	chr21:37509764-37510264	amot	0.153842	Body	0.649511	gli2a->chr21:37509764-37510264->amot	Act	0.398694	0.4851	0
rarga	M09291_2.00	chr21:37509764-37510264	amot	0.0627095	Body	0.473443	rarga->chr21:37509764-37510264->amot	Act	0.281721	0.4851	0
rxraa	M09291_2.00	chr21:37509764-37510264	amot	0.0822355	Body	0.481415	rxraa->chr21:37509764-37510264->amot	Act	0.560488	0.4851	0
rxraa	M00242	chr21:37530474-37530974	amot	0.18752	Body	0.481415	rxraa->chr21:37530474-37530974->amot	Act	0.560488	0.4851	0
ar	M00953	chr21:37530474-37530974	amot	0.258192	Body	0.596479	ar->chr21:37530474-37530974->amot	Act	0.456809	0.4851	0
rarga	M03562	chr21:37530474-37530974	amot	0.187177	Body	0.473443	rarga->chr21:37530474-37530974->amot	Act	0.281721	0.4851	0
rarab	M10044	chr21:37530474-37530974	amot	0.0841343	Body	0.511362	rarab->chr21:37530474-37530974->amot	Act	0.271116	0.4851	0
sox13	M00214_2.00	chr21:37530474-37530974	amot	0.102777	Body	0.595595	sox13->chr21:37530474-37530974->amot	Act	0.295973	0.4851	0
nr3c2	M11120_2.00	chr21:37530474-37530974	amot	0.121069	Body	0.476336	nr3c2->chr21:37530474-37530974->amot	Act	0.390207	0.4851	0
ar	M00953	chr21:37531013-37531513	amot	0.258192	Body	0.596479	ar->chr21:37531013-37531513->amot	Act	0.456809	0.4851	0
rarga	M03562	chr21:37531013-37531513	amot	0.187177	Body	0.473443	rarga->chr21:37531013-37531513->amot	Act	0.281721	0.4851	0
lhx2b	M07047	chr21:37531013-37531513	amot	0.193645	Body	0.561759	lhx2b->chr21:37531013-37531513->amot	Act	0.275906	0.4851	0
sox13	M00214_2.00	chr21:37531013-37531513	amot	0.102777	Body	0.595595	sox13->chr21:37531013-37531513->amot	Act	0.295973	0.4851	0
rarab	M06427_2.00	chr21:37531013-37531513	amot	0.0577549	Body	0.511362	rarab->chr21:37531013-37531513->amot	Act	0.271116	0.4851	0
rxraa	M06427_2.00	chr21:37531013-37531513	amot	0.170477	Body	0.481415	rxraa->chr21:37531013-37531513->amot	Act	0.560488	0.4851	0
nr3c2	M11120_2.00	chr21:37531013-37531513	amot	0.121069	Body	0.476336	nr3c2->chr21:37531013-37531513->amot	Act	0.390207	0.4851	0
sox13	M01014	chr21:37327226-37327726	amot	0.382335	Inter	0.595595	sox13->chr21:37327226-37327726->amot	Act	0.295973	0.4851	0
tcf7l2	M04775	chr21:37327226-37327726	amot	0.188685	Inter	0.486325	tcf7l2->chr21:37327226-37327726->amot	Act	0.32183	0.4851	0
ar	M08189	chr21:37352927-37353427	amot	0.387419	Inter	0.596479	ar->chr21:37352927-37353427->amot	Act	0.456809	0.4851	0
sox13	M03505_2.00	chr21:37352927-37353427	amot	0.223197	Inter	0.595595	sox13->chr21:37352927-37353427->amot	Act	0.295973	0.4851	0
lhx2b	M05197_2.00	chr21:37352927-37353427	amot	0.289592	Inter	0.561759	lhx2b->chr21:37352927-37353427->amot	Act	0.275906	0.4851	0
klf12b	M08857_2.00	chr21:37352927-37353427	amot	0.0584093	Inter	0.442056	klf12b->chr21:37352927-37353427->amot	Act	0.342959	0.4851	0
ar	M08189	chr21:37353483-37353983	amot	0.387419	Inter	0.596479	ar->chr21:37353483-37353983->amot	Act	0.456809	0.4851	0
nr2e1	M03357_2.00	chr21:37353483-37353983	amot	0.12088	Inter	0.379463	nr2e1->chr21:37353483-37353983->amot	Act	0.345467	0.4851	0
tcf7l2	M09386_2.00	chr21:37353483-37353983	amot	0.358656	Inter	0.486325	tcf7l2->chr21:37353483-37353983->amot	Act	0.32183	0.4851	0
sox13	M01014	chr21:37461243-37461743	amot	0.382335	Inter	0.595595	sox13->chr21:37461243-37461743->amot	Act	0.295973	0.4851	0
nr2e1	M03936_2.00	chr21:37461243-37461743	amot	0.12788	Inter	0.379463	nr2e1->chr21:37461243-37461743->amot	Act	0.345467	0.4851	0
rarga	M05642_2.00	chr21:37461243-37461743	amot	0.0515755	Inter	0.473443	rarga->chr21:37461243-37461743->amot	Act	0.281721	0.4851	0
rxraa	M05642_2.00	chr21:37461243-37461743	amot	0.0547657	Inter	0.481415	rxraa->chr21:37461243-37461743->amot	Act	0.560488	0.4851	0
rarab	M09265_2.00	chr21:37461243-37461743	amot	0.306463	Inter	0.511362	rarab->chr21:37461243-37461743->amot	Act	0.271116	0.4851	0
gli2a	M01037	chr21:37617366-37617866	amot	0.0839593	Inter	0.649511	gli2a->chr21:37617366-37617866->amot	Act	0.398694	0.4851	0
sox13	M03488_2.00	chr21:37617366-37617866	amot	0.179814	Inter	0.595595	sox13->chr21:37617366-37617866->amot	Act	0.295973	0.4851	0
rarga	M03929_2.00	chr21:37617366-37617866	amot	0.0517037	Inter	0.473443	rarga->chr21:37617366-37617866->amot	Act	0.281721	0.4851	0
rxraa	M03929_2.00	chr21:37617366-37617866	amot	0.072102	Inter	0.481415	rxraa->chr21:37617366-37617866->amot	Act	0.560488	0.4851	0
klf12b	M08857_2.00	chr21:37617366-37617866	amot	0.0584093	Inter	0.442056	klf12b->chr21:37617366-37617866->amot	Act	0.342959	0.4851	0
sox13	M03969_2.00	chr21:37618383-37618883	amot	0.340108	Inter	0.595595	sox13->chr21:37618383-37618883->amot	Act	0.295973	0.4851	0
foxo1b	M01216	chr21:37637162-37637662	amot	0.189166	Inter	0.277255	foxo1b->chr21:37637162-37637662->amot	Act	0.272074	0.4851	0
rxraa	M04787	chr21:37637162-37637662	amot	0.0608	Inter	0.481415	rxraa->chr21:37637162-37637662->amot	Act	0.560488	0.4851	0
lhx2b	M05219_2.00	chr21:37637162-37637662	amot	0.148922	Inter	0.561759	lhx2b->chr21:37637162-37637662->amot	Act	0.275906	0.4851	0
rarga	M09280_2.00	chr21:37637162-37637662	amot	0.08407	Inter	0.473443	rarga->chr21:37637162-37637662->amot	Act	0.281721	0.4851	0
rxraa	M03379_2.00	chr21:37477081-37477581	amot	0.0531148	TSS	0.481415	rxraa->chr21:37477081-37477581->amot	Act	0.560488	0.4851	0
sox13	M05759_2.00	chr21:37477081-37477581	amot	0.445289	TSS	0.595595	sox13->chr21:37477081-37477581->amot	Act	0.295973	0.4851	0
gli2a	M08875_2.00	chr21:37477081-37477581	amot	0.114009	TSS	0.649511	gli2a->chr21:37477081-37477581->amot	Act	0.398694	0.4851	0
lhx2b	M09676_2.00	chr21:37477081-37477581	amot	0.191759	TSS	0.561759	lhx2b->chr21:37477081-37477581->amot	Act	0.275906	0.4851	0
foxp1a	M03753_2.00	chr22:1234285-1234785	ampd2a	0.0850582	Body	0.149858	foxp1a->chr22:1234285-1234785->ampd2a	Act	0.293204	0.331228	0
nfixa	M09379_2.00	chr22:1234285-1234785	ampd2a	0.349876	Body	0.189425	nfixa->chr22:1234285-1234785->ampd2a	Act	0.512419	0.331228	0
foxo1a	M10537_2.00	chr22:1236665-1237165	ampd2a	0.142621	Body	0.231007	foxo1a->chr22:1236665-1237165->ampd2a	Act	0.378908	0.331228	0
sox13	M03487_2.00	chr22:1247815-1248315	ampd2a	0.14668	Inter	0.245791	sox13->chr22:1247815-1248315->ampd2a	Act	0.295973	0.331228	0
klf12b	M08857_2.00	chr22:1247815-1248315	ampd2a	0.0584093	Inter	0.210021	klf12b->chr22:1247815-1248315->ampd2a	Act	0.342959	0.331228	0
foxo1a	M08299	chr22:1372731-1373231	ampd2a	0.198335	Inter	0.231007	foxo1a->chr22:1372731-1373231->ampd2a	Act	0.378908	0.331228	0
sox13	M00212_2.00	chr22:1372731-1373231	ampd2a	0.276701	Inter	0.245791	sox13->chr22:1372731-1373231->ampd2a	Act	0.295973	0.331228	0
rarga	M02400_2.00	chr22:1372731-1373231	ampd2a	0.0898497	Inter	0.248071	rarga->chr22:1372731-1373231->ampd2a	Act	0.281721	0.331228	0
rorb	M02400_2.00	chr22:1372731-1373231	ampd2a	0.231678	Inter	0.0720558	rorb->chr22:1372731-1373231->ampd2a	Act	0.518637	0.331228	0
rarab	M03392_2.00	chr22:1372731-1373231	ampd2a	0.0568546	Inter	0.258794	rarab->chr22:1372731-1373231->ampd2a	Act	0.271116	0.331228	0
foxp1a	M06202_2.00	chr22:1372731-1373231	ampd2a	0.229224	Inter	0.149858	foxp1a->chr22:1372731-1373231->ampd2a	Act	0.293204	0.331228	0
foxo1a	M01216	chr22:1236046-1236546	ampd2a	0.3512	TSS	0.231007	foxo1a->chr22:1236046-1236546->ampd2a	Act	0.378908	0.331228	0
rorb	M01722	chr22:1236046-1236546	ampd2a	0.411551	TSS	0.0720558	rorb->chr22:1236046-1236546->ampd2a	Act	0.518637	0.331228	0
ar	M04453	chr22:1236046-1236546	ampd2a	0.254816	TSS	0.323959	ar->chr22:1236046-1236546->ampd2a	Act	0.456809	0.331228	0
nr3c2	M04477	chr22:1236046-1236546	ampd2a	0.28069	TSS	0.240769	nr3c2->chr22:1236046-1236546->ampd2a	Act	0.390207	0.331228	0
plagl2	M05510	chr22:1236046-1236546	ampd2a	0.139461	TSS	0.264192	plagl2->chr22:1236046-1236546->ampd2a	Act	0.329948	0.331228	0
rarga	M02423_2.00	chr22:1236046-1236546	ampd2a	0.0557557	TSS	0.248071	rarga->chr22:1236046-1236546->ampd2a	Act	0.281721	0.331228	0
nfixa	M03479_2.00	chr22:1236046-1236546	ampd2a	0.357697	TSS	0.189425	nfixa->chr22:1236046-1236546->ampd2a	Act	0.512419	0.331228	0
foxp1a	M03753_2.00	chr22:1236046-1236546	ampd2a	0.0850582	TSS	0.149858	foxp1a->chr22:1236046-1236546->ampd2a	Act	0.293204	0.331228	0
rarab	M03928_2.00	chr22:1236046-1236546	ampd2a	0.317114	TSS	0.258794	rarab->chr22:1236046-1236546->ampd2a	Act	0.271116	0.331228	0
sox13	M09398_2.00	chr22:1236046-1236546	ampd2a	0.31965	TSS	0.245791	sox13->chr22:1236046-1236546->ampd2a	Act	0.295973	0.331228	0
sox13	M01026_2.00	chr19:46943537-46944037	angpt1	0.478959	Body	0.637003	sox13->chr19:46943537-46944037->angpt1	Act	0.295973	0.310457	0
lhx2b	M07047	chr19:46957354-46957854	angpt1	0.193645	Body	0.498007	lhx2b->chr19:46957354-46957854->angpt1	Act	0.275906	0.310457	1.19981
foxo1a	M03823	chr19:46957922-46958422	angpt1	0.456812	Body	0.463459	foxo1a->chr19:46957922-46958422->angpt1	Act	0.378908	0.310457	0
tead1a	M04141	chr19:46957922-46958422	angpt1	0.321624	Body	0.380254	tead1a->chr19:46957922-46958422->angpt1	Act	0.371967	0.310457	0
sox13	M00214_2.00	chr19:46957922-46958422	angpt1	0.102777	Body	0.637003	sox13->chr19:46957922-46958422->angpt1	Act	0.295973	0.310457	0
foxo1a	M03021_2.00	chr19:46806668-46807168	angpt1	0.321064	Inter	0.463459	foxo1a->chr19:46806668-46807168->angpt1	Act	0.378908	0.310457	0
tead1a	M03576_2.00	chr19:46806668-46807168	angpt1	0.355605	Inter	0.380254	tead1a->chr19:46806668-46807168->angpt1	Act	0.371967	0.310457	0
rxraa	M00762	chr6:51931985-51932485	angpt4	0.063149	Body	0.403652	rxraa->chr6:51931985-51932485->angpt4	Act	0.560488	0.268827	0
foxo1b	M01968	chr6:51931985-51932485	angpt4	0.0919402	Body	0.326527	foxo1b->chr6:51931985-51932485->angpt4	Act	0.272074	0.268827	0
ar	M08189	chr6:51931985-51932485	angpt4	0.387419	Body	0.58615	ar->chr6:51931985-51932485->angpt4	Act	0.456809	0.268827	0
foxo1a	M09931	chr6:51931985-51932485	angpt4	0.21737	Body	0.498613	foxo1a->chr6:51931985-51932485->angpt4	Act	0.378908	0.268827	0
rorb	M05605_2.00	chr6:51931985-51932485	angpt4	0.145721	Body	0.172785	rorb->chr6:51931985-51932485->angpt4	Act	0.518637	0.268827	0
rarga	M05606_2.00	chr6:51931985-51932485	angpt4	0.0549593	Body	0.46752	rarga->chr6:51931985-51932485->angpt4	Act	0.281721	0.268827	0
stat3	M08015_2.00	chr6:51931985-51932485	angpt4	0.200473	Body	0.440576	stat3->chr6:51931985-51932485->angpt4	Act	0.327768	0.268827	0
foxo1a	M00473	chr6:52038400-52038900	angpt4	0.225692	Inter	0.498613	foxo1a->chr6:52038400-52038900->angpt4	Act	0.378908	0.268827	0
foxo1b	M00473	chr6:52038400-52038900	angpt4	0.112331	Inter	0.326527	foxo1b->chr6:52038400-52038900->angpt4	Act	0.272074	0.268827	0
rxraa	M00647	chr6:52038400-52038900	angpt4	0.0660954	Inter	0.403652	rxraa->chr6:52038400-52038900->angpt4	Act	0.560488	0.268827	0
rarga	M09278_2.00	chr6:52038400-52038900	angpt4	0.193974	Inter	0.46752	rarga->chr6:52038400-52038900->angpt4	Act	0.281721	0.268827	0
rorb	M09278_2.00	chr6:52038400-52038900	angpt4	0.275942	Inter	0.172785	rorb->chr6:52038400-52038900->angpt4	Act	0.518637	0.268827	0
sox13	M09389_2.00	chr6:52038400-52038900	angpt4	0.62294	Inter	0.583591	sox13->chr6:52038400-52038900->angpt4	Act	0.295973	0.268827	0
rxraa	M00512	chr6:52038944-52039444	angpt4	0.0638808	Inter	0.403652	rxraa->chr6:52038944-52039444->angpt4	Act	0.560488	0.268827	0
foxo1a	M03823	chr6:52038944-52039444	angpt4	0.456812	Inter	0.498613	foxo1a->chr6:52038944-52039444->angpt4	Act	0.378908	0.268827	0
foxo1b	M03021_2.00	chr6:52038944-52039444	angpt4	0.12215	Inter	0.326527	foxo1b->chr6:52038944-52039444->angpt4	Act	0.272074	0.268827	0
rarga	M03377_2.00	chr6:52038944-52039444	angpt4	0.0501974	Inter	0.46752	rarga->chr6:52038944-52039444->angpt4	Act	0.281721	0.268827	0
rorb	M03377_2.00	chr6:52038944-52039444	angpt4	0.0757314	Inter	0.172785	rorb->chr6:52038944-52039444->angpt4	Act	0.518637	0.268827	0
ar	M00956	chr6:52124110-52124610	angpt4	0.275009	Inter	0.58615	ar->chr6:52124110-52124610->angpt4	Act	0.456809	0.268827	0
foxo1a	M08304	chr6:52124110-52124610	angpt4	0.0715894	Inter	0.498613	foxo1a->chr6:52124110-52124610->angpt4	Act	0.378908	0.268827	0
sox13	M03486_2.00	chr6:52124110-52124610	angpt4	0.0883177	Inter	0.583591	sox13->chr6:52124110-52124610->angpt4	Act	0.295973	0.268827	0
rorb	M03926_2.00	chr6:52124110-52124610	angpt4	0.10903	Inter	0.172785	rorb->chr6:52124110-52124610->angpt4	Act	0.518637	0.268827	0
lhx2b	M05224_2.00	chr6:52124110-52124610	angpt4	0.218576	Inter	0.522899	lhx2b->chr6:52124110-52124610->angpt4	Act	0.275906	0.268827	0
vax2	M05224_2.00	chr6:52124110-52124610	angpt4	0.143152	Inter	0.369518	vax2->chr6:52124110-52124610->angpt4	Act	0.459159	0.268827	0
rarga	M09604_2.00	chr6:52124110-52124610	angpt4	0.0559028	Inter	0.46752	rarga->chr6:52124110-52124610->angpt4	Act	0.281721	0.268827	0
nr3c2	M11120_2.00	chr6:52124110-52124610	angpt4	0.121069	Inter	0.471968	nr3c2->chr6:52124110-52124610->angpt4	Act	0.390207	0.268827	0
foxo1a	M04257	chr8:33019605-33020105	angptl2b	0.133348	Inter	0.206535	foxo1a->chr8:33019605-33020105->angptl2b	Act	0.378908	0.464621	2.25032
sox13	M03515_2.00	chr8:33019605-33020105	angptl2b	0.100643	Inter	0.210933	sox13->chr8:33019605-33020105->angptl2b	Act	0.295973	0.464621	2.25032
tead1a	M04142	chr8:33024771-33025271	angptl2b	0.148445	Inter	0.0863527	tead1a->chr8:33024771-33025271->angptl2b	Act	0.371967	0.464621	0
rxraa	M09277_2.00	chr8:33024771-33025271	angptl2b	0.126311	Inter	0.130088	rxraa->chr8:33024771-33025271->angptl2b	Act	0.560488	0.464621	0
sox13	M03498_2.00	chr8:33053994-33054494	angptl2b	0.228254	Inter	0.210933	sox13->chr8:33053994-33054494->angptl2b	Act	0.295973	0.464621	0
vax2	M08457_2.00	chr8:33053994-33054494	angptl2b	0.143372	Inter	0.189786	vax2->chr8:33053994-33054494->angptl2b	Act	0.459159	0.464621	0
gli2a	M03902	chr8:33057801-33058301	angptl2b	0.339781	Inter	0.269902	gli2a->chr8:33057801-33058301->angptl2b	Act	0.398694	0.464621	0
sox13	M08899	chr8:33057801-33058301	angptl2b	0.431399	Inter	0.210933	sox13->chr8:33057801-33058301->angptl2b	Act	0.295973	0.464621	0
lhx2b	M10282	chr8:33057801-33058301	angptl2b	0.23577	Inter	0.252948	lhx2b->chr8:33057801-33058301->angptl2b	Act	0.275906	0.464621	0
vax2	M05038_2.00	chr8:33057801-33058301	angptl2b	0.165068	Inter	0.189786	vax2->chr8:33057801-33058301->angptl2b	Act	0.459159	0.464621	0
vdrb	M00444	chr8:33201939-33202439	angptl2b	0.090754	Inter	0.182593	vdrb->chr8:33201939-33202439->angptl2b	Act	0.421237	0.464621	0
foxo1a	M03021_2.00	chr8:33201939-33202439	angptl2b	0.321064	Inter	0.206535	foxo1a->chr8:33201939-33202439->angptl2b	Act	0.378908	0.464621	0
rxraa	M07994_2.00	chr8:33201939-33202439	angptl2b	0.167146	Inter	0.130088	rxraa->chr8:33201939-33202439->angptl2b	Act	0.560488	0.464621	0
nr3c2	M09609_2.00	chr8:33201939-33202439	angptl2b	0.0919	Inter	0.200283	nr3c2->chr8:33201939-33202439->angptl2b	Act	0.390207	0.464621	0
fosl2	M00925	chr19:43921527-43922027	ankib1a	0.55321	Body	0.310372	fosl2->chr19:43921527-43922027->ankib1a	Act	0.273506	0.362468	0
ascl1a	M04207_2.00	chr19:43921527-43922027	ankib1a	0.108449	Body	0.295886	ascl1a->chr19:43921527-43922027->ankib1a	Act	0.349897	0.362468	0
zic2b	M02940	chr19:43923435-43923935	ankib1a	0.140495	Body	0.33005	zic2b->chr19:43923435-43923935->ankib1a	Act	0.256339	0.362468	0
nr2e1	M03358_2.00	chr19:43923435-43923935	ankib1a	0.0836499	Body	0.243298	nr2e1->chr19:43923435-43923935->ankib1a	Act	0.345467	0.362468	0
sox13	M03491_2.00	chr19:43923435-43923935	ankib1a	0.168778	Body	0.297627	sox13->chr19:43923435-43923935->ankib1a	Act	0.295973	0.362468	0
tead1a	M08175_2.00	chr19:43923435-43923935	ankib1a	0.373477	Body	0.372886	tead1a->chr19:43923435-43923935->ankib1a	Act	0.371967	0.362468	0
rorb	M11191_2.00	chr19:43681031-43681531	ankib1a	0.2408	Inter	0.334417	rorb->chr19:43681031-43681531->ankib1a	Act	0.518637	0.362468	0
rfx2	M11247_2.00	chr19:43775993-43776493	ankib1a	0.332572	Inter	0.301365	rfx2->chr19:43775993-43776493->ankib1a	Act	0.396514	0.362468	0
tcf7l1a	M00805	chr19:43905388-43905888	ankib1a	0.230037	TSS	0.35075	tcf7l1a->chr19:43905388-43905888->ankib1a	Act	0.287814	0.362468	0
ascl1a	M09767	chr19:43905388-43905888	ankib1a	0.0571486	TSS	0.295886	ascl1a->chr19:43905388-43905888->ankib1a	Act	0.349897	0.362468	0
sox13	M00197_2.00	chr19:43905388-43905888	ankib1a	0.31565	TSS	0.297627	sox13->chr19:43905388-43905888->ankib1a	Act	0.295973	0.362468	0
nr2e1	M03360_2.00	chr19:43905388-43905888	ankib1a	0.145426	TSS	0.243298	nr2e1->chr19:43905388-43905888->ankib1a	Act	0.345467	0.362468	0
rorb	M03375_2.00	chr19:43905388-43905888	ankib1a	0.0683586	TSS	0.334417	rorb->chr19:43905388-43905888->ankib1a	Act	0.518637	0.362468	0
rarab	M09278_2.00	chr19:43905388-43905888	ankib1a	0.10023	TSS	0.0634447	rarab->chr19:43905388-43905888->ankib1a	Act	0.271116	0.362468	0
foxo1a	M09931	chr16:20055554-20056054	ankrd28b	0.21737	TSS	0.161671	foxo1a->chr16:20055554-20056054->ankrd28b	Act	0.378908	0.378227	0
tcf7l1a	M09400_2.00	chr16:20055554-20056054	ankrd28b	0.355136	TSS	0.248034	tcf7l1a->chr16:20055554-20056054->ankrd28b	Act	0.287814	0.378227	0
lhx2b	M07047	chr7:32875342-32875842	ano5b	0.193645	Body	0.529922	lhx2b->chr7:32875342-32875842->ano5b	Act	0.275906	0.437684	0
rarga	M00181_2.00	chr7:32875342-32875842	ano5b	0.0815959	Body	0.426332	rarga->chr7:32875342-32875842->ano5b	Act	0.281721	0.437684	0
rarab	M05566_2.00	chr7:32875342-32875842	ano5b	0.087917	Body	0.475978	rarab->chr7:32875342-32875842->ano5b	Act	0.271116	0.437684	0
foxo1a	M03823	chr7:32892744-32893244	ano5b	0.456812	Body	0.38454	foxo1a->chr7:32892744-32893244->ano5b	Act	0.378908	0.437684	0
sox13	M00214_2.00	chr7:32892744-32893244	ano5b	0.102777	Body	0.523979	sox13->chr7:32892744-32893244->ano5b	Act	0.295973	0.437684	0
lhx2b	M07047	chr7:32895429-32895929	ano5b	0.193645	Body	0.529922	lhx2b->chr7:32895429-32895929->ano5b	Act	0.275906	0.437684	0
sox13	M03494_2.00	chr7:32895429-32895929	ano5b	0.0699735	Body	0.523979	sox13->chr7:32895429-32895929->ano5b	Act	0.295973	0.437684	0
rarab	M05621_2.00	chr7:32895429-32895929	ano5b	0.0769385	Body	0.475978	rarab->chr7:32895429-32895929->ano5b	Act	0.271116	0.437684	0
rarga	M05621_2.00	chr7:32895429-32895929	ano5b	0.0951243	Body	0.426332	rarga->chr7:32895429-32895929->ano5b	Act	0.281721	0.437684	0
rarab	M02787	chr7:32718500-32719000	ano5b	0.0506533	Inter	0.475978	rarab->chr7:32718500-32719000->ano5b	Act	0.271116	0.437684	0
rarga	M03562	chr7:32718500-32719000	ano5b	0.187177	Inter	0.426332	rarga->chr7:32718500-32719000->ano5b	Act	0.281721	0.437684	0
foxo1a	M08465	chr7:32718500-32719000	ano5b	0.0548661	Inter	0.38454	foxo1a->chr7:32718500-32719000->ano5b	Act	0.378908	0.437684	0
tcf7l2	M00198_2.00	chr7:32718500-32719000	ano5b	0.154676	Inter	0.420549	tcf7l2->chr7:32718500-32719000->ano5b	Act	0.32183	0.437684	0
sox13	M03500_2.00	chr7:32718500-32719000	ano5b	0.0668148	Inter	0.523979	sox13->chr7:32718500-32719000->ano5b	Act	0.295973	0.437684	0
gli2a	M01037	chr7:32719078-32719578	ano5b	0.0839593	Inter	0.580994	gli2a->chr7:32719078-32719578->ano5b	Act	0.398694	0.437684	0
foxo1a	M04257	chr7:32719078-32719578	ano5b	0.133348	Inter	0.38454	foxo1a->chr7:32719078-32719578->ano5b	Act	0.378908	0.437684	0
epas1b	M09906	chr7:32719078-32719578	ano5b	0.116161	Inter	0.634678	epas1b->chr7:32719078-32719578->ano5b	Act	0.470616	0.437684	0
rarab	M05678_2.00	chr7:32719078-32719578	ano5b	0.145944	Inter	0.475978	rarab->chr7:32719078-32719578->ano5b	Act	0.271116	0.437684	0
rarga	M05678_2.00	chr7:32719078-32719578	ano5b	0.136481	Inter	0.426332	rarga->chr7:32719078-32719578->ano5b	Act	0.281721	0.437684	0
sox13	M09388_2.00	chr7:32719078-32719578	ano5b	0.582094	Inter	0.523979	sox13->chr7:32719078-32719578->ano5b	Act	0.295973	0.437684	0
foxo1a	M03823	chr7:33077166-33077666	ano5b	0.456812	Inter	0.38454	foxo1a->chr7:33077166-33077666->ano5b	Act	0.378908	0.437684	0
rarga	M00181_2.00	chr7:33077166-33077666	ano5b	0.0815959	Inter	0.426332	rarga->chr7:33077166-33077666->ano5b	Act	0.281721	0.437684	0
sox13	M01026_2.00	chr7:33077166-33077666	ano5b	0.478959	Inter	0.523979	sox13->chr7:33077166-33077666->ano5b	Act	0.295973	0.437684	0
rarab	M06427_2.00	chr7:33077166-33077666	ano5b	0.0577549	Inter	0.475978	rarab->chr7:33077166-33077666->ano5b	Act	0.271116	0.437684	0
tcf7l2	M09400_2.00	chr7:33077166-33077666	ano5b	0.523976	Inter	0.420549	tcf7l2->chr7:33077166-33077666->ano5b	Act	0.32183	0.437684	0
rarga	M09297_2.00	chr7:33097868-33098368	ano5b	0.0708669	Inter	0.426332	rarga->chr7:33097868-33098368->ano5b	Act	0.281721	0.437684	0
rarab	M09273_2.00	chr5:35561359-35561859	ar	0.144277	Body	0.4636	rarab->chr5:35561359-35561859->ar	Act	0.271116	0.456809	0
nfixa	M09378_2.00	chr5:35561359-35561859	ar	0.38538	Body	0.300844	nfixa->chr5:35561359-35561859->ar	Act	0.512419	0.456809	0
sox13	M11331_2.00	chr5:35561359-35561859	ar	0.537607	Body	0.456897	sox13->chr5:35561359-35561859->ar	Act	0.295973	0.456809	0
rarab	M09273_2.00	chr5:35561863-35562363	ar	0.144277	Body	0.4636	rarab->chr5:35561863-35562363->ar	Act	0.271116	0.456809	0
rarab	M05592_2.00	chr5:35563787-35564287	ar	0.0611507	Body	0.4636	rarab->chr5:35563787-35564287->ar	Act	0.271116	0.456809	0
sox13	M08168_2.00	chr5:35563787-35564287	ar	0.58539	Body	0.456897	sox13->chr5:35563787-35564287->ar	Act	0.295973	0.456809	0
rarab	M02787	chr5:35538024-35538524	ar	0.0506533	Inter	0.4636	rarab->chr5:35538024-35538524->ar	Act	0.271116	0.456809	1.01166
sox13	M03973_2.00	chr5:35538024-35538524	ar	0.217875	Inter	0.456897	sox13->chr5:35538024-35538524->ar	Act	0.295973	0.456809	1.01166
gli2a	M08023_2.00	chr5:35538024-35538524	ar	0.061166	Inter	0.528259	gli2a->chr5:35538024-35538524->ar	Act	0.398694	0.456809	1.01166
vax2	M09181_2.00	chr5:35538024-35538524	ar	0.0787954	Inter	0.336145	vax2->chr5:35538024-35538524->ar	Act	0.459159	0.456809	1.01166
sox13	M03508_2.00	chr5:35540487-35540987	ar	0.288403	Inter	0.456897	sox13->chr5:35540487-35540987->ar	Act	0.295973	0.456809	0.382733
rarab	M05592_2.00	chr5:35540487-35540987	ar	0.0611507	Inter	0.4636	rarab->chr5:35540487-35540987->ar	Act	0.271116	0.456809	0.382733
tcf7l2	M07136	chr5:35541079-35541579	ar	0.232667	Inter	0.38984	tcf7l2->chr5:35541079-35541579->ar	Act	0.32183	0.456809	1.21188
sox13	M00201_2.00	chr5:35541079-35541579	ar	0.235587	Inter	0.456897	sox13->chr5:35541079-35541579->ar	Act	0.295973	0.456809	1.21188
rarab	M05592_2.00	chr5:35541079-35541579	ar	0.0611507	Inter	0.4636	rarab->chr5:35541079-35541579->ar	Act	0.271116	0.456809	1.21188
mef2aa	M09253_2.00	chr5:35541079-35541579	ar	0.0568749	Inter	0.338667	mef2aa->chr5:35541079-35541579->ar	Act	0.308083	0.456809	1.21188
vax2	M01327	chr5:35559538-35560038	ar	0.0915929	Inter	0.336145	vax2->chr5:35559538-35560038->ar	Act	0.459159	0.456809	0
lhx2b	M04386	chr5:35559538-35560038	ar	0.0522425	Inter	0.475613	lhx2b->chr5:35559538-35560038->ar	Act	0.275906	0.456809	0
sox13	M02718_2.00	chr5:35559538-35560038	ar	0.363546	Inter	0.456897	sox13->chr5:35559538-35560038->ar	Act	0.295973	0.456809	0
sox13	M05791_2.00	chr5:35738807-35739307	ar	0.534961	Inter	0.456897	sox13->chr5:35738807-35739307->ar	Act	0.295973	0.456809	0
rarab	M02787	chr5:35799812-35800312	ar	0.0506533	Inter	0.4636	rarab->chr5:35799812-35800312->ar	Act	0.271116	0.456809	0
tcf7l2	M07136	chr5:35799812-35800312	ar	0.232667	Inter	0.38984	tcf7l2->chr5:35799812-35800312->ar	Act	0.32183	0.456809	0
sox13	M08899	chr5:35799812-35800312	ar	0.431399	Inter	0.456897	sox13->chr5:35799812-35800312->ar	Act	0.295973	0.456809	0
lhx2b	M05009_2.00	chr5:35799812-35800312	ar	0.268322	Inter	0.475613	lhx2b->chr5:35799812-35800312->ar	Act	0.275906	0.456809	0
vax2	M05009_2.00	chr5:35799812-35800312	ar	0.183111	Inter	0.336145	vax2->chr5:35799812-35800312->ar	Act	0.459159	0.456809	0
sox13	M01026_2.00	chr5:35560791-35561291	ar	0.478959	TSS	0.456897	sox13->chr5:35560791-35561291->ar	Act	0.295973	0.456809	0
tcf7l2	M09394_2.00	chr5:35560791-35561291	ar	0.260135	TSS	0.38984	tcf7l2->chr5:35560791-35561291->ar	Act	0.32183	0.456809	0
nfixa	M02050	chr24:28450118-28450618	arhgap29a	0.351999	Body	0.293221	nfixa->chr24:28450118-28450618->arhgap29a	Act	0.512419	0.356366	0
sox13	M05751_2.00	chr24:28450118-28450618	arhgap29a	0.590074	Body	0.261665	sox13->chr24:28450118-28450618->arhgap29a	Act	0.295973	0.356366	0
rarab	M09276_2.00	chr24:28450118-28450618	arhgap29a	0.367431	Body	0.242432	rarab->chr24:28450118-28450618->arhgap29a	Act	0.271116	0.356366	0
lhx2b	M10714_2.00	chr24:28450118-28450618	arhgap29a	0.278521	Body	0.288955	lhx2b->chr24:28450118-28450618->arhgap29a	Act	0.275906	0.356366	0
ar	M08189	chr24:28502313-28502813	arhgap29a	0.387419	Body	0.351783	ar->chr24:28502313-28502813->arhgap29a	Act	0.456809	0.356366	0
sox13	M08041_2.00	chr24:28502313-28502813	arhgap29a	0.358239	Body	0.261665	sox13->chr24:28502313-28502813->arhgap29a	Act	0.295973	0.356366	0
ar	M08189	chr24:28513960-28514460	arhgap29a	0.387419	Body	0.351783	ar->chr24:28513960-28514460->arhgap29a	Act	0.456809	0.356366	0
sox13	M00213_2.00	chr24:28513960-28514460	arhgap29a	0.444439	Body	0.261665	sox13->chr24:28513960-28514460->arhgap29a	Act	0.295973	0.356366	0
ar	M10174	chr24:28539033-28539533	arhgap29a	0.357975	Body	0.351783	ar->chr24:28539033-28539533->arhgap29a	Act	0.456809	0.356366	0
nr3c2	M02395_2.00	chr24:28539033-28539533	arhgap29a	0.0906981	Body	0.223072	nr3c2->chr24:28539033-28539533->arhgap29a	Act	0.390207	0.356366	0
nfixa	M09381_2.00	chr24:28539033-28539533	arhgap29a	0.361709	Body	0.293221	nfixa->chr24:28539033-28539533->arhgap29a	Act	0.512419	0.356366	0
rxraa	M04787	chr24:28240408-28240908	arhgap29a	0.0608	Inter	0.295568	rxraa->chr24:28240408-28240908->arhgap29a	Act	0.560488	0.356366	0
tcf7l2	M05895_2.00	chr24:28240408-28240908	arhgap29a	0.0852363	Inter	0.185976	tcf7l2->chr24:28240408-28240908->arhgap29a	Act	0.32183	0.356366	0
sox13	M09397_2.00	chr24:28240408-28240908	arhgap29a	0.583807	Inter	0.261665	sox13->chr24:28240408-28240908->arhgap29a	Act	0.295973	0.356366	0
lhx2b	M09676_2.00	chr24:28240408-28240908	arhgap29a	0.191759	Inter	0.288955	lhx2b->chr24:28240408-28240908->arhgap29a	Act	0.275906	0.356366	0
rxraa	M00763	chr24:28336659-28337159	arhgap29a	0.154586	Inter	0.295568	rxraa->chr24:28336659-28337159->arhgap29a	Act	0.560488	0.356366	0
lhx2b	M07047	chr24:28336659-28337159	arhgap29a	0.193645	Inter	0.288955	lhx2b->chr24:28336659-28337159->arhgap29a	Act	0.275906	0.356366	0
sox13	M02488_2.00	chr24:28336659-28337159	arhgap29a	0.259841	Inter	0.261665	sox13->chr24:28336659-28337159->arhgap29a	Act	0.295973	0.356366	0
rarab	M03391_2.00	chr24:28336659-28337159	arhgap29a	0.0695662	Inter	0.242432	rarab->chr24:28336659-28337159->arhgap29a	Act	0.271116	0.356366	0
rxraa	M04787	chr24:28658503-28659003	arhgap29a	0.0608	Inter	0.295568	rxraa->chr24:28658503-28659003->arhgap29a	Act	0.560488	0.356366	0
sox13	M03545_2.00	chr24:28658503-28659003	arhgap29a	0.143025	Inter	0.261665	sox13->chr24:28658503-28659003->arhgap29a	Act	0.295973	0.356366	0
sox13	M05751_2.00	chr2:15128637-15129137	arhgap29b	0.590074	Body	0.258245	sox13->chr2:15128637-15129137->arhgap29b	Act	0.295973	0.434744	0
gli2a	M01703	chr2:15139554-15140054	arhgap29b	0.15947	Body	0.357617	gli2a->chr2:15139554-15140054->arhgap29b	Act	0.398694	0.434744	0
plagl2	M05510	chr2:15139554-15140054	arhgap29b	0.139461	Body	0.251609	plagl2->chr2:15139554-15140054->arhgap29b	Act	0.329948	0.434744	0
ar	M08189	chr2:15139554-15140054	arhgap29b	0.387419	Body	0.214295	ar->chr2:15139554-15140054->arhgap29b	Act	0.456809	0.434744	0
sox13	M00213_2.00	chr2:15139554-15140054	arhgap29b	0.444439	Body	0.258245	sox13->chr2:15139554-15140054->arhgap29b	Act	0.295973	0.434744	0
tcf7l1b	M02646_2.00	chr2:15139554-15140054	arhgap29b	0.0769694	Body	0.241374	tcf7l1b->chr2:15139554-15140054->arhgap29b	Act	0.390873	0.434744	0
tcf7l2	M02646_2.00	chr2:15139554-15140054	arhgap29b	0.148628	Body	0.179916	tcf7l2->chr2:15139554-15140054->arhgap29b	Act	0.32183	0.434744	0
tead1a	M03995_2.00	chr2:15139554-15140054	arhgap29b	0.334726	Body	0.22454	tead1a->chr2:15139554-15140054->arhgap29b	Act	0.371967	0.434744	0
ar	M00447	chr2:15144063-15144563	arhgap29b	0.204659	Body	0.214295	ar->chr2:15144063-15144563->arhgap29b	Act	0.456809	0.434744	0
foxo1a	M03823	chr2:15144063-15144563	arhgap29b	0.456812	Body	0.233508	foxo1a->chr2:15144063-15144563->arhgap29b	Act	0.378908	0.434744	0
gli2a	M03902	chr2:15144063-15144563	arhgap29b	0.339781	Body	0.357617	gli2a->chr2:15144063-15144563->arhgap29b	Act	0.398694	0.434744	0
sox13	M00197_2.00	chr2:15144063-15144563	arhgap29b	0.31565	Body	0.258245	sox13->chr2:15144063-15144563->arhgap29b	Act	0.295973	0.434744	0
ar	M00962	chr2:15146774-15147274	arhgap29b	0.28152	Body	0.214295	ar->chr2:15146774-15147274->arhgap29b	Act	0.456809	0.434744	0
gli2a	M01037	chr2:15146774-15147274	arhgap29b	0.0839593	Body	0.357617	gli2a->chr2:15146774-15147274->arhgap29b	Act	0.398694	0.434744	0
foxo1a	M03823	chr2:15146774-15147274	arhgap29b	0.456812	Body	0.233508	foxo1a->chr2:15146774-15147274->arhgap29b	Act	0.378908	0.434744	0
tead1a	M04141	chr2:15146774-15147274	arhgap29b	0.321624	Body	0.22454	tead1a->chr2:15146774-15147274->arhgap29b	Act	0.371967	0.434744	0
sox13	M09787	chr2:15146774-15147274	arhgap29b	0.540612	Body	0.258245	sox13->chr2:15146774-15147274->arhgap29b	Act	0.295973	0.434744	0
gli2a	M01037	chr2:15147351-15147851	arhgap29b	0.0839593	Body	0.357617	gli2a->chr2:15147351-15147851->arhgap29b	Act	0.398694	0.434744	0
tead1a	M04141	chr2:15147351-15147851	arhgap29b	0.321624	Body	0.22454	tead1a->chr2:15147351-15147851->arhgap29b	Act	0.371967	0.434744	0
foxo1a	M07094	chr2:15107375-15107875	arhgap29b	0.0631126	Inter	0.233508	foxo1a->chr2:15107375-15107875->arhgap29b	Act	0.378908	0.434744	0
ar	M00962	chr21:24604454-24604954	arhgap32b	0.28152	Body	0.498065	ar->chr21:24604454-24604954->arhgap32b	Act	0.456809	0.42945	0
lhx2b	M07047	chr21:24604454-24604954	arhgap32b	0.193645	Body	0.488502	lhx2b->chr21:24604454-24604954->arhgap32b	Act	0.275906	0.42945	0
rorb	M00181_2.00	chr21:24604454-24604954	arhgap32b	0.1411	Body	0.349424	rorb->chr21:24604454-24604954->arhgap32b	Act	0.518637	0.42945	0
rarab	M03391_2.00	chr21:24604454-24604954	arhgap32b	0.0695662	Body	0.481393	rarab->chr21:24604454-24604954->arhgap32b	Act	0.271116	0.42945	0
rorb	M01722	chr21:24607774-24608274	arhgap32b	0.411551	Body	0.349424	rorb->chr21:24607774-24608274->arhgap32b	Act	0.518637	0.42945	0
rarab	M00819_2.00	chr21:24607774-24608274	arhgap32b	0.0578609	Body	0.481393	rarab->chr21:24607774-24608274->arhgap32b	Act	0.271116	0.42945	0
sox13	M03537_2.00	chr21:24607774-24608274	arhgap32b	0.110618	Body	0.524034	sox13->chr21:24607774-24608274->arhgap32b	Act	0.295973	0.42945	0
tcf7l1b	M09400_2.00	chr21:24607774-24608274	arhgap32b	0.442143	Body	0.360617	tcf7l1b->chr21:24607774-24608274->arhgap32b	Act	0.390873	0.42945	0
tcf7l2	M09400_2.00	chr21:24607774-24608274	arhgap32b	0.523976	Body	0.522582	tcf7l2->chr21:24607774-24608274->arhgap32b	Act	0.32183	0.42945	0
lhx2b	M07047	chr21:24614791-24615291	arhgap32b	0.193645	Body	0.488502	lhx2b->chr21:24614791-24615291->arhgap32b	Act	0.275906	0.42945	0
rorb	M00822_2.00	chr21:24614791-24615291	arhgap32b	0.0869793	Body	0.349424	rorb->chr21:24614791-24615291->arhgap32b	Act	0.518637	0.42945	0
rarab	M02705_2.00	chr21:24614791-24615291	arhgap32b	0.239924	Body	0.481393	rarab->chr21:24614791-24615291->arhgap32b	Act	0.271116	0.42945	0
epas1b	M09906	chr21:24632533-24633033	arhgap32b	0.116161	Body	0.60424	epas1b->chr21:24632533-24633033->arhgap32b	Act	0.470616	0.42945	0
vezf1a	M10107	chr21:24632533-24633033	arhgap32b	0.377438	Body	0.0515027	vezf1a->chr21:24632533-24633033->arhgap32b	Act	0.393767	0.42945	0
sox13	M05790_2.00	chr21:24632533-24633033	arhgap32b	0.406803	Body	0.524034	sox13->chr21:24632533-24633033->arhgap32b	Act	0.295973	0.42945	0
klf12b	M08857_2.00	chr21:24632533-24633033	arhgap32b	0.0584093	Body	0.470086	klf12b->chr21:24632533-24633033->arhgap32b	Act	0.342959	0.42945	0
rorb	M09274_2.00	chr21:24632533-24633033	arhgap32b	0.11094	Body	0.349424	rorb->chr21:24632533-24633033->arhgap32b	Act	0.518637	0.42945	0
ar	M00481	chr21:24643037-24643537	arhgap32b	0.307221	Inter	0.498065	ar->chr21:24643037-24643537->arhgap32b	Act	0.456809	0.42945	0
nr3c2	M04477	chr21:24643037-24643537	arhgap32b	0.28069	Inter	0.476832	nr3c2->chr21:24643037-24643537->arhgap32b	Act	0.390207	0.42945	0
rorb	M00818_2.00	chr21:24643037-24643537	arhgap32b	0.112632	Inter	0.349424	rorb->chr21:24643037-24643537->arhgap32b	Act	0.518637	0.42945	0
rarab	M03391_2.00	chr21:24643037-24643537	arhgap32b	0.0695662	Inter	0.481393	rarab->chr21:24643037-24643537->arhgap32b	Act	0.271116	0.42945	0
sox13	M05791_2.00	chr21:24643037-24643537	arhgap32b	0.534961	Inter	0.524034	sox13->chr21:24643037-24643537->arhgap32b	Act	0.295973	0.42945	0
tcf7l1b	M09392_2.00	chr21:24643037-24643537	arhgap32b	0.429509	Inter	0.360617	tcf7l1b->chr21:24643037-24643537->arhgap32b	Act	0.390873	0.42945	0
tcf7l2	M09392_2.00	chr21:24643037-24643537	arhgap32b	0.465533	Inter	0.522582	tcf7l2->chr21:24643037-24643537->arhgap32b	Act	0.32183	0.42945	0
lhx2b	M07047	chr21:24648545-24649045	arhgap32b	0.193645	Inter	0.488502	lhx2b->chr21:24648545-24649045->arhgap32b	Act	0.275906	0.42945	0
rorb	M05646_2.00	chr21:24648545-24649045	arhgap32b	0.0695909	Inter	0.349424	rorb->chr21:24648545-24649045->arhgap32b	Act	0.518637	0.42945	0
ar	M00962	chr21:24879415-24879915	arhgap32b	0.28152	Inter	0.498065	ar->chr21:24879415-24879915->arhgap32b	Act	0.456809	0.42945	0
lhx2b	M07047	chr21:24879415-24879915	arhgap32b	0.193645	Inter	0.488502	lhx2b->chr21:24879415-24879915->arhgap32b	Act	0.275906	0.42945	0
rorb	M08966	chr21:24879415-24879915	arhgap32b	0.562027	Inter	0.349424	rorb->chr21:24879415-24879915->arhgap32b	Act	0.518637	0.42945	0
rarab	M00820_2.00	chr21:24879415-24879915	arhgap32b	0.179555	Inter	0.481393	rarab->chr21:24879415-24879915->arhgap32b	Act	0.271116	0.42945	0
tcf7l1b	M08428_2.00	chr21:24879415-24879915	arhgap32b	0.145376	Inter	0.360617	tcf7l1b->chr21:24879415-24879915->arhgap32b	Act	0.390873	0.42945	0
tcf7l2	M08428_2.00	chr21:24879415-24879915	arhgap32b	0.210262	Inter	0.522582	tcf7l2->chr21:24879415-24879915->arhgap32b	Act	0.32183	0.42945	0
sox13	M09398_2.00	chr21:24879415-24879915	arhgap32b	0.31965	Inter	0.524034	sox13->chr21:24879415-24879915->arhgap32b	Act	0.295973	0.42945	0
erfl3	M04794_2.00	chr15:8683664-8684164	arhgap35a	0.0569095	Body	0.204931	erfl3->chr15:8683664-8684164->arhgap35a	Act	0.412952	0.382515	0
nfixa	M02050	chr15:8686522-8687022	arhgap35a	0.351999	Body	0.346911	nfixa->chr15:8686522-8687022->arhgap35a	Act	0.512419	0.382515	0
ar	M00962	chr15:8733760-8734260	arhgap35a	0.28152	Body	0.275056	ar->chr15:8733760-8734260->arhgap35a	Act	0.456809	0.382515	0
rxraa	M04787	chr15:8733760-8734260	arhgap35a	0.0608	Body	0.406133	rxraa->chr15:8733760-8734260->arhgap35a	Act	0.560488	0.382515	0
nfixa	M05741_2.00	chr15:8733760-8734260	arhgap35a	0.375635	Body	0.346911	nfixa->chr15:8733760-8734260->arhgap35a	Act	0.512419	0.382515	0
foxo1a	M03823	chr15:8738084-8738584	arhgap35a	0.456812	Body	0.356498	foxo1a->chr15:8738084-8738584->arhgap35a	Act	0.378908	0.382515	0
rxraa	M00966	chr15:8749655-8750155	arhgap35a	0.134742	Body	0.406133	rxraa->chr15:8749655-8750155->arhgap35a	Act	0.560488	0.382515	0
foxo1a	M01216	chr15:8749655-8750155	arhgap35a	0.3512	Body	0.356498	foxo1a->chr15:8749655-8750155->arhgap35a	Act	0.378908	0.382515	0
erfl3	M09055_2.00	chr15:8749655-8750155	arhgap35a	0.378177	Body	0.204931	erfl3->chr15:8749655-8750155->arhgap35a	Act	0.412952	0.382515	0
ar	M09266_2.00	chr15:8749655-8750155	arhgap35a	0.307993	Body	0.275056	ar->chr15:8749655-8750155->arhgap35a	Act	0.456809	0.382515	0
nr3c2	M09266_2.00	chr15:8749655-8750155	arhgap35a	0.274293	Body	0.300731	nr3c2->chr15:8749655-8750155->arhgap35a	Act	0.390207	0.382515	0
tcf7l2	M07136	chr15:8762835-8763335	arhgap35a	0.232667	Body	0.362957	tcf7l2->chr15:8762835-8763335->arhgap35a	Act	0.32183	0.382515	0
rorb	M05659_2.00	chr15:8762835-8763335	arhgap35a	0.118696	Body	0.325586	rorb->chr15:8762835-8763335->arhgap35a	Act	0.518637	0.382515	0
erfl3	M08111_2.00	chr15:8762835-8763335	arhgap35a	0.357467	Body	0.204931	erfl3->chr15:8762835-8763335->arhgap35a	Act	0.412952	0.382515	0
mef2aa	M00026	chr15:8539508-8540008	arhgap35a	0.0621812	Inter	0.190099	mef2aa->chr15:8539508-8540008->arhgap35a	Act	0.308083	0.382515	0
ar	M08189	chr15:8539508-8540008	arhgap35a	0.387419	Inter	0.275056	ar->chr15:8539508-8540008->arhgap35a	Act	0.456809	0.382515	0
erfl3	M09055_2.00	chr15:8539508-8540008	arhgap35a	0.378177	Inter	0.204931	erfl3->chr15:8539508-8540008->arhgap35a	Act	0.412952	0.382515	0
tcf7l2	M07136	chr15:8762266-8762766	arhgap35a	0.232667	TSS	0.362957	tcf7l2->chr15:8762266-8762766->arhgap35a	Act	0.32183	0.382515	0
ar	M08189	chr15:8762266-8762766	arhgap35a	0.387419	TSS	0.275056	ar->chr15:8762266-8762766->arhgap35a	Act	0.456809	0.382515	0
gli2a	M04402_2.00	chr15:8762266-8762766	arhgap35a	0.0887611	TSS	0.440458	gli2a->chr15:8762266-8762766->arhgap35a	Act	0.398694	0.382515	0
erfl3	M10494_2.00	chr15:8762266-8762766	arhgap35a	0.092124	TSS	0.204931	erfl3->chr15:8762266-8762766->arhgap35a	Act	0.412952	0.382515	0
sox13	M01014	chr17:25197436-25197936	arhgef10	0.382335	Body	0.441771	sox13->chr17:25197436-25197936->arhgef10	Act	0.295973	0.297845	0
rorb	M05601_2.00	chr17:25197436-25197936	arhgef10	0.0981032	Body	0.132904	rorb->chr17:25197436-25197936->arhgef10	Act	0.518637	0.297845	0
rxraa	M05601_2.00	chr17:25197436-25197936	arhgef10	0.0850907	Body	0.373057	rxraa->chr17:25197436-25197936->arhgef10	Act	0.560488	0.297845	0
tead1a	M06455_2.00	chr17:25197436-25197936	arhgef10	0.0883063	Body	0.238756	tead1a->chr17:25197436-25197936->arhgef10	Act	0.371967	0.297845	0
sox13	M02718_2.00	chr17:25199322-25199822	arhgef10	0.363546	Body	0.441771	sox13->chr17:25199322-25199822->arhgef10	Act	0.295973	0.297845	0
rorb	M09286_2.00	chr17:25199322-25199822	arhgef10	0.0550905	Body	0.132904	rorb->chr17:25199322-25199822->arhgef10	Act	0.518637	0.297845	0
rxraa	M09286_2.00	chr17:25199322-25199822	arhgef10	0.0793936	Body	0.373057	rxraa->chr17:25199322-25199822->arhgef10	Act	0.560488	0.297845	0
rarab	M09317_2.00	chr17:25199322-25199822	arhgef10	0.081656	Body	0.422892	rarab->chr17:25199322-25199822->arhgef10	Act	0.271116	0.297845	0
rarga	M09317_2.00	chr17:25199322-25199822	arhgef10	0.136703	Body	0.370542	rarga->chr17:25199322-25199822->arhgef10	Act	0.281721	0.297845	0
tead1a	M09434_2.00	chr17:25199322-25199822	arhgef10	0.302181	Body	0.238756	tead1a->chr17:25199322-25199822->arhgef10	Act	0.371967	0.297845	0
rxraa	M00242	chr17:25199928-25200428	arhgef10	0.18752	Body	0.373057	rxraa->chr17:25199928-25200428->arhgef10	Act	0.560488	0.297845	0
lhx2b	M07047	chr17:25199928-25200428	arhgef10	0.193645	Body	0.449311	lhx2b->chr17:25199928-25200428->arhgef10	Act	0.275906	0.297845	0
gli2a	M07455	chr17:25199928-25200428	arhgef10	0.132432	Body	0.526634	gli2a->chr17:25199928-25200428->arhgef10	Act	0.398694	0.297845	0
ar	M08189	chr17:25199928-25200428	arhgef10	0.387419	Body	0.494554	ar->chr17:25199928-25200428->arhgef10	Act	0.456809	0.297845	0
sox13	M02719_2.00	chr17:25199928-25200428	arhgef10	0.478973	Body	0.441771	sox13->chr17:25199928-25200428->arhgef10	Act	0.295973	0.297845	0
rarab	M09278_2.00	chr17:25199928-25200428	arhgef10	0.10023	Body	0.422892	rarab->chr17:25199928-25200428->arhgef10	Act	0.271116	0.297845	0
rarga	M09278_2.00	chr17:25199928-25200428	arhgef10	0.193974	Body	0.370542	rarga->chr17:25199928-25200428->arhgef10	Act	0.281721	0.297845	0
rorb	M09278_2.00	chr17:25199928-25200428	arhgef10	0.275942	Body	0.132904	rorb->chr17:25199928-25200428->arhgef10	Act	0.518637	0.297845	0
sox13	M09389_2.00	chr17:25210561-25211061	arhgef10	0.62294	Body	0.441771	sox13->chr17:25210561-25211061->arhgef10	Act	0.295973	0.297845	0
gli2a	M07292	chr17:25226826-25227326	arhgef10	0.122262	Body	0.526634	gli2a->chr17:25226826-25227326->arhgef10	Act	0.398694	0.297845	0
ar	M09863	chr17:25226826-25227326	arhgef10	0.149743	Body	0.494554	ar->chr17:25226826-25227326->arhgef10	Act	0.456809	0.297845	0
sox13	M00213_2.00	chr17:25226826-25227326	arhgef10	0.444439	Body	0.441771	sox13->chr17:25226826-25227326->arhgef10	Act	0.295973	0.297845	0
nr3c2	M09288_2.00	chr17:25226826-25227326	arhgef10	0.248185	Body	0.380125	nr3c2->chr17:25226826-25227326->arhgef10	Act	0.390207	0.297845	0
tcf7l2	M09392_2.00	chr17:25226826-25227326	arhgef10	0.465533	Body	0.374955	tcf7l2->chr17:25226826-25227326->arhgef10	Act	0.32183	0.297845	0
ar	M00962	chr17:25244918-25245418	arhgef10	0.28152	Body	0.494554	ar->chr17:25244918-25245418->arhgef10	Act	0.456809	0.297845	0
rarab	M10044	chr17:25244918-25245418	arhgef10	0.0841343	Body	0.422892	rarab->chr17:25244918-25245418->arhgef10	Act	0.271116	0.297845	0
rarga	M09277_2.00	chr17:25244918-25245418	arhgef10	0.143013	Body	0.370542	rarga->chr17:25244918-25245418->arhgef10	Act	0.281721	0.297845	0
rorb	M09277_2.00	chr17:25244918-25245418	arhgef10	0.158295	Body	0.132904	rorb->chr17:25244918-25245418->arhgef10	Act	0.518637	0.297845	0
rxraa	M09277_2.00	chr17:25244918-25245418	arhgef10	0.126311	Body	0.373057	rxraa->chr17:25244918-25245418->arhgef10	Act	0.560488	0.297845	0
pax2b	M00486	chr17:25248477-25248977	arhgef10	0.070166	Body	0.175872	pax2b->chr17:25248477-25248977->arhgef10	Act	0.346983	0.297845	0
rxraa	M01268	chr17:25248477-25248977	arhgef10	0.0611396	Body	0.373057	rxraa->chr17:25248477-25248977->arhgef10	Act	0.560488	0.297845	0
rarga	M03434_2.00	chr17:25248477-25248977	arhgef10	0.0562117	Body	0.370542	rarga->chr17:25248477-25248977->arhgef10	Act	0.281721	0.297845	0
rorb	M03434_2.00	chr17:25248477-25248977	arhgef10	0.0615289	Body	0.132904	rorb->chr17:25248477-25248977->arhgef10	Act	0.518637	0.297845	0
sox13	M03530_2.00	chr17:25248477-25248977	arhgef10	0.0681796	Body	0.441771	sox13->chr17:25248477-25248977->arhgef10	Act	0.295973	0.297845	0
lhx2b	M05197_2.00	chr17:25248477-25248977	arhgef10	0.289592	Body	0.449311	lhx2b->chr17:25248477-25248977->arhgef10	Act	0.275906	0.297845	0
rarab	M09282_2.00	chr17:25248477-25248977	arhgef10	0.315678	Body	0.422892	rarab->chr17:25248477-25248977->arhgef10	Act	0.271116	0.297845	0
gli2a	M01703	chr17:25180853-25181353	arhgef10	0.15947	Inter	0.526634	gli2a->chr17:25180853-25181353->arhgef10	Act	0.398694	0.297845	0
sox13	M05791_2.00	chr17:25180853-25181353	arhgef10	0.534961	Inter	0.441771	sox13->chr17:25180853-25181353->arhgef10	Act	0.295973	0.297845	0
rxraa	M09333_2.00	chr17:25180853-25181353	arhgef10	0.0554904	Inter	0.373057	rxraa->chr17:25180853-25181353->arhgef10	Act	0.560488	0.297845	0
rxraa	M02791	chr17:25181736-25182236	arhgef10	0.0625688	Inter	0.373057	rxraa->chr17:25181736-25182236->arhgef10	Act	0.560488	0.297845	0
rarga	M00181_2.00	chr17:25181736-25182236	arhgef10	0.0815959	Inter	0.370542	rarga->chr17:25181736-25182236->arhgef10	Act	0.281721	0.297845	0
rorb	M00181_2.00	chr17:25181736-25182236	arhgef10	0.1411	Inter	0.132904	rorb->chr17:25181736-25182236->arhgef10	Act	0.518637	0.297845	0
sox13	M05898_2.00	chr17:25195225-25195725	arhgef10	0.348658	Inter	0.441771	sox13->chr17:25195225-25195725->arhgef10	Act	0.295973	0.297845	3.82897
rxraa	M10055	chr17:25388263-25388763	arhgef10	0.305927	Inter	0.373057	rxraa->chr17:25388263-25388763->arhgef10	Act	0.560488	0.297845	0
rarab	M09294_2.00	chr17:25388263-25388763	arhgef10	0.222039	Inter	0.422892	rarab->chr17:25388263-25388763->arhgef10	Act	0.271116	0.297845	0
rarga	M09294_2.00	chr17:25388263-25388763	arhgef10	0.308445	Inter	0.370542	rarga->chr17:25388263-25388763->arhgef10	Act	0.281721	0.297845	0
rorb	M09294_2.00	chr17:25388263-25388763	arhgef10	0.461076	Inter	0.132904	rorb->chr17:25388263-25388763->arhgef10	Act	0.518637	0.297845	0
sox13	M11331_2.00	chr17:25388263-25388763	arhgef10	0.537607	Inter	0.441771	sox13->chr17:25388263-25388763->arhgef10	Act	0.295973	0.297845	0
ar	M08189	chr17:25213265-25213765	arhgef10	0.387419	TSS	0.494554	ar->chr17:25213265-25213765->arhgef10	Act	0.456809	0.297845	0
tcf7l2	M00198_2.00	chr17:25213265-25213765	arhgef10	0.154676	TSS	0.374955	tcf7l2->chr17:25213265-25213765->arhgef10	Act	0.32183	0.297845	0
tcf7l1a	M00805	chr11:29562700-29563200	arhgef10la	0.230037	Body	0.223377	tcf7l1a->chr11:29562700-29563200->arhgef10la	Act	0.287814	0.393804	0
mef2aa	M09637	chr11:29562700-29563200	arhgef10la	0.0873321	Body	0.0489912	mef2aa->chr11:29562700-29563200->arhgef10la	Act	0.308083	0.393804	0
erfl3	M09048_2.00	chr11:29562700-29563200	arhgef10la	0.232452	Body	0.18942	erfl3->chr11:29562700-29563200->arhgef10la	Act	0.412952	0.393804	0
fosl2	M00924	chr11:29291126-29291626	arhgef10la	0.565179	Inter	0.137853	fosl2->chr11:29291126-29291626->arhgef10la	Act	0.273506	0.393804	0
fosl2	M00926	chr15:22458466-22458966	arhgef12a	0.561869	Body	0.192712	fosl2->chr15:22458466-22458966->arhgef12a	Act	0.273506	0.315677	0
e2f3	M08875	chr15:22458466-22458966	arhgef12a	0.172576	Body	0.146835	e2f3->chr15:22458466-22458966->arhgef12a	Act	0.374128	0.315677	0
myb	M00913	chr15:22467355-22467855	arhgef12a	0.195522	Body	0.189553	myb->chr15:22467355-22467855->arhgef12a	Act	0.268851	0.315677	0
sox13	M01014	chr15:22467355-22467855	arhgef12a	0.382335	Body	0.213105	sox13->chr15:22467355-22467855->arhgef12a	Act	0.295973	0.315677	0
creb5b	M04210	chr15:22467355-22467855	arhgef12a	0.289685	Body	0.0394623	creb5b->chr15:22467355-22467855->arhgef12a	Act	0.371766	0.315677	0
fosl2	M08924	chr15:22467355-22467855	arhgef12a	0.0506572	Body	0.192712	fosl2->chr15:22467355-22467855->arhgef12a	Act	0.273506	0.315677	0
sox13	M03492_2.00	chr15:22326251-22326751	arhgef12a	0.203852	Inter	0.213105	sox13->chr15:22326251-22326751->arhgef12a	Act	0.295973	0.315677	0
fosl2	M00925	chr15:22446048-22446548	arhgef12a	0.55321	Inter	0.192712	fosl2->chr15:22446048-22446548->arhgef12a	Act	0.273506	0.315677	0
sox13	M02488_2.00	chr15:22446048-22446548	arhgef12a	0.259841	Inter	0.213105	sox13->chr15:22446048-22446548->arhgef12a	Act	0.295973	0.315677	0
erfl3	M04709_2.00	chr15:22446048-22446548	arhgef12a	0.135499	Inter	0.198447	erfl3->chr15:22446048-22446548->arhgef12a	Act	0.412952	0.315677	0
e2f3	M09029_2.00	chr15:22446048-22446548	arhgef12a	0.0851539	Inter	0.146835	e2f3->chr15:22446048-22446548->arhgef12a	Act	0.374128	0.315677	0
tcf7l1a	M04005	chr15:22571054-22571554	arhgef12a	0.111561	Inter	0.196199	tcf7l1a->chr15:22571054-22571554->arhgef12a	Act	0.287814	0.315677	0
tcf7l1b	M04005	chr15:22571054-22571554	arhgef12a	0.158168	Inter	0.217567	tcf7l1b->chr15:22571054-22571554->arhgef12a	Act	0.390873	0.315677	0
sox13	M00214_2.00	chr15:22571054-22571554	arhgef12a	0.102777	Inter	0.213105	sox13->chr15:22571054-22571554->arhgef12a	Act	0.295973	0.315677	0
erfl3	M04798_2.00	chr15:22571054-22571554	arhgef12a	0.0624073	Inter	0.198447	erfl3->chr15:22571054-22571554->arhgef12a	Act	0.412952	0.315677	0
fosl2	M08069_2.00	chr15:22571054-22571554	arhgef12a	0.582258	Inter	0.192712	fosl2->chr15:22571054-22571554->arhgef12a	Act	0.273506	0.315677	0
tcf7l1a	M00805	chr15:22574034-22574534	arhgef12a	0.230037	Inter	0.196199	tcf7l1a->chr15:22574034-22574534->arhgef12a	Act	0.287814	0.315677	0
fosl2	M07827_2.00	chr15:22574034-22574534	arhgef12a	0.58101	Inter	0.192712	fosl2->chr15:22574034-22574534->arhgef12a	Act	0.273506	0.315677	0
vezf1a	M10107	chr15:22597818-22598318	arhgef12a	0.377438	Inter	0.163003	vezf1a->chr15:22597818-22598318->arhgef12a	Act	0.393767	0.315677	0
tcf7l1a	M03511_2.00	chr15:22610662-22611162	arhgef12a	0.0734213	Inter	0.196199	tcf7l1a->chr15:22610662-22611162->arhgef12a	Act	0.287814	0.315677	0
tcf7l1b	M03511_2.00	chr15:22610662-22611162	arhgef12a	0.0930733	Inter	0.217567	tcf7l1b->chr15:22610662-22611162->arhgef12a	Act	0.390873	0.315677	0
erfl3	M09052_2.00	chr15:22610662-22611162	arhgef12a	0.173374	Inter	0.198447	erfl3->chr15:22610662-22611162->arhgef12a	Act	0.412952	0.315677	0
sox13	M09396_2.00	chr15:22610662-22611162	arhgef12a	0.505468	Inter	0.213105	sox13->chr15:22610662-22611162->arhgef12a	Act	0.295973	0.315677	0
fosl2	M03870	chr15:22630398-22630898	arhgef12a	0.573182	Inter	0.192712	fosl2->chr15:22630398-22630898->arhgef12a	Act	0.273506	0.315677	0
sox13	M05769_2.00	chr15:22630398-22630898	arhgef12a	0.292601	Inter	0.213105	sox13->chr15:22630398-22630898->arhgef12a	Act	0.295973	0.315677	0
myb	M09601_2.00	chr15:22630398-22630898	arhgef12a	0.225275	Inter	0.189553	myb->chr15:22630398-22630898->arhgef12a	Act	0.268851	0.315677	0
tcf7l1a	M00805	chr15:22633712-22634212	arhgef12a	0.230037	Inter	0.196199	tcf7l1a->chr15:22633712-22634212->arhgef12a	Act	0.287814	0.315677	0
tcf7l1b	M04005	chr15:22633712-22634212	arhgef12a	0.158168	Inter	0.217567	tcf7l1b->chr15:22633712-22634212->arhgef12a	Act	0.390873	0.315677	0
fosl2	M08932	chr15:22633712-22634212	arhgef12a	0.0856818	Inter	0.192712	fosl2->chr15:22633712-22634212->arhgef12a	Act	0.273506	0.315677	0
creb5b	M01808_2.00	chr15:22633712-22634212	arhgef12a	0.193994	Inter	0.0394623	creb5b->chr15:22633712-22634212->arhgef12a	Act	0.371766	0.315677	0
erfl3	M08111_2.00	chr15:22633712-22634212	arhgef12a	0.357467	Inter	0.198447	erfl3->chr15:22633712-22634212->arhgef12a	Act	0.412952	0.315677	0
fosl2	M00924	chr15:22636736-22637236	arhgef12a	0.565179	Inter	0.192712	fosl2->chr15:22636736-22637236->arhgef12a	Act	0.273506	0.315677	0
sox13	M06450_2.00	chr15:22636736-22637236	arhgef12a	0.500268	Inter	0.213105	sox13->chr15:22636736-22637236->arhgef12a	Act	0.295973	0.315677	0
tcf7l1a	M09400_2.00	chr15:22636736-22637236	arhgef12a	0.355136	Inter	0.196199	tcf7l1a->chr15:22636736-22637236->arhgef12a	Act	0.287814	0.315677	0
tcf7l1b	M09400_2.00	chr15:22636736-22637236	arhgef12a	0.442143	Inter	0.217567	tcf7l1b->chr15:22636736-22637236->arhgef12a	Act	0.390873	0.315677	0
sox13	M03515_2.00	chr15:22658211-22658711	arhgef12a	0.100643	Inter	0.213105	sox13->chr15:22658211-22658711->arhgef12a	Act	0.295973	0.315677	0
myb	M11068_2.00	chr15:22665001-22665501	arhgef12a	0.135549	Inter	0.189553	myb->chr15:22665001-22665501->arhgef12a	Act	0.268851	0.315677	0
rxraa	M04787	chr5:58763440-58763940	arhgef12b	0.0608	Body	0.425293	rxraa->chr5:58763440-58763940->arhgef12b	Act	0.560488	0.31981	0
rorb	M05678_2.00	chr5:58763440-58763940	arhgef12b	0.210595	Body	0.463055	rorb->chr5:58763440-58763940->arhgef12b	Act	0.518637	0.31981	0
erfl3	M08111_2.00	chr5:58763440-58763940	arhgef12b	0.357467	Body	0.445593	erfl3->chr5:58763440-58763940->arhgef12b	Act	0.412952	0.31981	0
tcf7l2	M04775	chr5:58791692-58792192	arhgef12b	0.188685	Body	0.434879	tcf7l2->chr5:58791692-58792192->arhgef12b	Act	0.32183	0.31981	0
rorb	M08782	chr5:58791692-58792192	arhgef12b	0.178997	Body	0.463055	rorb->chr5:58791692-58792192->arhgef12b	Act	0.518637	0.31981	0
rxraa	M10055	chr5:58791692-58792192	arhgef12b	0.305927	Body	0.425293	rxraa->chr5:58791692-58792192->arhgef12b	Act	0.560488	0.31981	0
tcf7l1b	M02646_2.00	chr5:58791692-58792192	arhgef12b	0.0769694	Body	0.525226	tcf7l1b->chr5:58791692-58792192->arhgef12b	Act	0.390873	0.31981	0
tcf7l1a	M03532_2.00	chr5:58791692-58792192	arhgef12b	0.0545043	Body	0.4279	tcf7l1a->chr5:58791692-58792192->arhgef12b	Act	0.287814	0.31981	0
sox13	M03969_2.00	chr5:58791692-58792192	arhgef12b	0.340108	Body	0.606445	sox13->chr5:58791692-58792192->arhgef12b	Act	0.295973	0.31981	0
vax2	M06325_2.00	chr5:58791692-58792192	arhgef12b	0.0732205	Body	0.117758	vax2->chr5:58791692-58792192->arhgef12b	Act	0.459159	0.31981	0
rxraa	M03419_2.00	chr5:58802409-58802909	arhgef12b	0.054582	Body	0.425293	rxraa->chr5:58802409-58802909->arhgef12b	Act	0.560488	0.31981	0
erfl3	M04709_2.00	chr5:58802409-58802909	arhgef12b	0.135499	Body	0.445593	erfl3->chr5:58802409-58802909->arhgef12b	Act	0.412952	0.31981	0
vax2	M05009_2.00	chr5:58802409-58802909	arhgef12b	0.183111	Body	0.117758	vax2->chr5:58802409-58802909->arhgef12b	Act	0.459159	0.31981	0
rxraa	M08954	chr5:58809143-58809643	arhgef12b	0.138626	Body	0.425293	rxraa->chr5:58809143-58809643->arhgef12b	Act	0.560488	0.31981	0
nr3c2	M02395_2.00	chr5:58809143-58809643	arhgef12b	0.0906981	Body	0.325122	nr3c2->chr5:58809143-58809643->arhgef12b	Act	0.390207	0.31981	0
rfx2	M07494_2.00	chr5:58809143-58809643	arhgef12b	0.126881	Body	0.441482	rfx2->chr5:58809143-58809643->arhgef12b	Act	0.396514	0.31981	0
sox13	M09388_2.00	chr5:58809143-58809643	arhgef12b	0.582094	Body	0.606445	sox13->chr5:58809143-58809643->arhgef12b	Act	0.295973	0.31981	0
rxraa	M03788	chr5:58813418-58813918	arhgef12b	0.155488	Body	0.425293	rxraa->chr5:58813418-58813918->arhgef12b	Act	0.560488	0.31981	0
rfx2	M04095	chr5:58813418-58813918	arhgef12b	0.361508	Body	0.441482	rfx2->chr5:58813418-58813918->arhgef12b	Act	0.396514	0.31981	0
rorb	M02401_2.00	chr5:58813418-58813918	arhgef12b	0.138233	Body	0.463055	rorb->chr5:58813418-58813918->arhgef12b	Act	0.518637	0.31981	0
sox13	M03487_2.00	chr5:58813418-58813918	arhgef12b	0.14668	Body	0.606445	sox13->chr5:58813418-58813918->arhgef12b	Act	0.295973	0.31981	0
erfl3	M04742_2.00	chr5:58813418-58813918	arhgef12b	0.0627029	Body	0.445593	erfl3->chr5:58813418-58813918->arhgef12b	Act	0.412952	0.31981	0
foxo1a	M00473	chr5:58821789-58822289	arhgef12b	0.225692	Body	0.471556	foxo1a->chr5:58821789-58822289->arhgef12b	Act	0.378908	0.31981	0
vax2	M01327	chr5:58821789-58822289	arhgef12b	0.0915929	Body	0.117758	vax2->chr5:58821789-58822289->arhgef12b	Act	0.459159	0.31981	0
tcf7l1a	M01594	chr5:58821789-58822289	arhgef12b	0.313715	Body	0.4279	tcf7l1a->chr5:58821789-58822289->arhgef12b	Act	0.287814	0.31981	0
fosl2	M08932	chr5:58821789-58822289	arhgef12b	0.0856818	Body	0.45991	fosl2->chr5:58821789-58822289->arhgef12b	Act	0.273506	0.31981	0
sox13	M00208_2.00	chr5:58821789-58822289	arhgef12b	0.146741	Body	0.606445	sox13->chr5:58821789-58822289->arhgef12b	Act	0.295973	0.31981	0
erfl3	M08111_2.00	chr5:58821789-58822289	arhgef12b	0.357467	Body	0.445593	erfl3->chr5:58821789-58822289->arhgef12b	Act	0.412952	0.31981	0
nr3c2	M09288_2.00	chr5:58821789-58822289	arhgef12b	0.248185	Body	0.325122	nr3c2->chr5:58821789-58822289->arhgef12b	Act	0.390207	0.31981	0
tcf7l1b	M09400_2.00	chr5:58821789-58822289	arhgef12b	0.442143	Body	0.525226	tcf7l1b->chr5:58821789-58822289->arhgef12b	Act	0.390873	0.31981	0
tcf7l2	M09400_2.00	chr5:58821789-58822289	arhgef12b	0.523976	Body	0.434879	tcf7l2->chr5:58821789-58822289->arhgef12b	Act	0.32183	0.31981	0
gli2a	M03902	chr5:58832068-58832568	arhgef12b	0.339781	Body	0.675644	gli2a->chr5:58832068-58832568->arhgef12b	Act	0.398694	0.31981	0
rxraa	M09000	chr5:58832068-58832568	arhgef12b	0.0839612	Body	0.425293	rxraa->chr5:58832068-58832568->arhgef12b	Act	0.560488	0.31981	0
tcf7l1a	M00198_2.00	chr5:58832068-58832568	arhgef12b	0.0618615	Body	0.4279	tcf7l1a->chr5:58832068-58832568->arhgef12b	Act	0.287814	0.31981	0
tcf7l1b	M00198_2.00	chr5:58832068-58832568	arhgef12b	0.0840065	Body	0.525226	tcf7l1b->chr5:58832068-58832568->arhgef12b	Act	0.390873	0.31981	0
tcf7l2	M00198_2.00	chr5:58832068-58832568	arhgef12b	0.154676	Body	0.434879	tcf7l2->chr5:58832068-58832568->arhgef12b	Act	0.32183	0.31981	0
vax2	M06500_2.00	chr5:58832068-58832568	arhgef12b	0.217695	Body	0.117758	vax2->chr5:58832068-58832568->arhgef12b	Act	0.459159	0.31981	0
nr3c2	M09288_2.00	chr5:58832068-58832568	arhgef12b	0.248185	Body	0.325122	nr3c2->chr5:58832068-58832568->arhgef12b	Act	0.390207	0.31981	0
gli2a	M01703	chr5:58953756-58954256	arhgef12b	0.15947	Inter	0.675644	gli2a->chr5:58953756-58954256->arhgef12b	Act	0.398694	0.31981	0
rxraa	M02791	chr5:58953756-58954256	arhgef12b	0.0625688	Inter	0.425293	rxraa->chr5:58953756-58954256->arhgef12b	Act	0.560488	0.31981	0
fosl2	M09616	chr5:58953756-58954256	arhgef12b	0.578578	Inter	0.45991	fosl2->chr5:58953756-58954256->arhgef12b	Act	0.273506	0.31981	0
rorb	M00184_2.00	chr5:58953756-58954256	arhgef12b	0.0869793	Inter	0.463055	rorb->chr5:58953756-58954256->arhgef12b	Act	0.518637	0.31981	0
foxo1a	M04811_2.00	chr5:58953756-58954256	arhgef12b	0.0567849	Inter	0.471556	foxo1a->chr5:58953756-58954256->arhgef12b	Act	0.378908	0.31981	0
tead1a	M06455_2.00	chr5:58953756-58954256	arhgef12b	0.0883063	Inter	0.534311	tead1a->chr5:58953756-58954256->arhgef12b	Act	0.371967	0.31981	0
vax2	M06500_2.00	chr5:58953756-58954256	arhgef12b	0.217695	Inter	0.117758	vax2->chr5:58953756-58954256->arhgef12b	Act	0.459159	0.31981	0
nr3c2	M09288_2.00	chr5:58953756-58954256	arhgef12b	0.248185	Inter	0.325122	nr3c2->chr5:58953756-58954256->arhgef12b	Act	0.390207	0.31981	0
gli2a	M07455	chr5:58976270-58976770	arhgef12b	0.132432	Inter	0.675644	gli2a->chr5:58976270-58976770->arhgef12b	Act	0.398694	0.31981	0
foxo1a	M03051_2.00	chr5:58976270-58976770	arhgef12b	0.0896813	Inter	0.471556	foxo1a->chr5:58976270-58976770->arhgef12b	Act	0.378908	0.31981	0
nr3c2	M09288_2.00	chr5:58976270-58976770	arhgef12b	0.248185	Inter	0.325122	nr3c2->chr5:58976270-58976770->arhgef12b	Act	0.390207	0.31981	0
sox13	M09387_2.00	chr5:58976270-58976770	arhgef12b	0.605686	Inter	0.606445	sox13->chr5:58976270-58976770->arhgef12b	Act	0.295973	0.31981	0
ascl1a	M08744_2.00	chr22:10885644-10886144	arhgef18b	0.0623952	Body	0.115674	ascl1a->chr22:10885644-10886144->arhgef18b	Act	0.349897	0.282379	3.41081
vezf1a	M10107	chr22:10890812-10891312	arhgef18b	0.377438	Body	0.0754476	vezf1a->chr22:10890812-10891312->arhgef18b	Act	0.393767	0.282379	0
rarga	M02404_2.00	chr22:10890812-10891312	arhgef18b	0.117205	Body	0.0621945	rarga->chr22:10890812-10891312->arhgef18b	Act	0.281721	0.282379	0
tead1b	M04142	chr5:34875772-34876272	arhgef28a	0.0917647	Body	0.293346	tead1b->chr5:34875772-34876272->arhgef28a	Act	0.42071	0.38335	0
lhx2b	M00282_2.00	chr5:34875772-34876272	arhgef28a	0.188057	Body	0.573308	lhx2b->chr5:34875772-34876272->arhgef28a	Act	0.275906	0.38335	0
sox13	M11331_2.00	chr5:34875772-34876272	arhgef28a	0.537607	Body	0.464435	sox13->chr5:34875772-34876272->arhgef28a	Act	0.295973	0.38335	0
nfixa	M02050	chr5:34878059-34878559	arhgef28a	0.351999	Body	0.375103	nfixa->chr5:34878059-34878559->arhgef28a	Act	0.512419	0.38335	0
ar	M07204	chr5:34878059-34878559	arhgef28a	0.317912	Body	0.650269	ar->chr5:34878059-34878559->arhgef28a	Act	0.456809	0.38335	0
nr3c2	M09331_2.00	chr5:34878059-34878559	arhgef28a	0.337032	Body	0.508863	nr3c2->chr5:34878059-34878559->arhgef28a	Act	0.390207	0.38335	0
rxraa	M04787	chr5:34901161-34901661	arhgef28a	0.0608	Body	0.458008	rxraa->chr5:34901161-34901661->arhgef28a	Act	0.560488	0.38335	0
stat3	M01220	chr5:34909793-34910293	arhgef28a	0.267055	Body	0.309265	stat3->chr5:34909793-34910293->arhgef28a	Act	0.327768	0.38335	1.06832
mef2aa	M04022	chr5:34909793-34910293	arhgef28a	0.0599991	Body	0.366052	mef2aa->chr5:34909793-34910293->arhgef28a	Act	0.308083	0.38335	1.06832
lhx2b	M04386	chr5:34909793-34910293	arhgef28a	0.0522425	Body	0.573308	lhx2b->chr5:34909793-34910293->arhgef28a	Act	0.275906	0.38335	1.06832
rxraa	M04489	chr5:34909793-34910293	arhgef28a	0.102528	Body	0.458008	rxraa->chr5:34909793-34910293->arhgef28a	Act	0.560488	0.38335	1.06832
rarga	M03375_2.00	chr5:34909793-34910293	arhgef28a	0.056306	Body	0.416342	rarga->chr5:34909793-34910293->arhgef28a	Act	0.281721	0.38335	1.06832
rorb	M03375_2.00	chr5:34909793-34910293	arhgef28a	0.0683586	Body	0.102492	rorb->chr5:34909793-34910293->arhgef28a	Act	0.518637	0.38335	1.06832
rorb	M08966	chr5:34945422-34945922	arhgef28a	0.562027	Body	0.102492	rorb->chr5:34945422-34945922->arhgef28a	Act	0.518637	0.38335	0
rarga	M00181_2.00	chr5:34945422-34945922	arhgef28a	0.0815959	Body	0.416342	rarga->chr5:34945422-34945922->arhgef28a	Act	0.281721	0.38335	0
rxraa	M00181_2.00	chr5:34945422-34945922	arhgef28a	0.0731955	Body	0.458008	rxraa->chr5:34945422-34945922->arhgef28a	Act	0.560488	0.38335	0
rarab	M05883_2.00	chr5:34945422-34945922	arhgef28a	0.364274	Body	0.559234	rarab->chr5:34945422-34945922->arhgef28a	Act	0.271116	0.38335	0
ar	M00956	chr5:34949299-34949799	arhgef28a	0.275009	Body	0.650269	ar->chr5:34949299-34949799->arhgef28a	Act	0.456809	0.38335	0
lhx2b	M07385	chr5:34949299-34949799	arhgef28a	0.133008	Body	0.573308	lhx2b->chr5:34949299-34949799->arhgef28a	Act	0.275906	0.38335	0
rxraa	M09655	chr5:34949299-34949799	arhgef28a	0.158101	Body	0.458008	rxraa->chr5:34949299-34949799->arhgef28a	Act	0.560488	0.38335	0
rarab	M10044	chr5:34949299-34949799	arhgef28a	0.0841343	Body	0.559234	rarab->chr5:34949299-34949799->arhgef28a	Act	0.271116	0.38335	0
sox13	M00202_2.00	chr5:34949299-34949799	arhgef28a	0.146741	Body	0.464435	sox13->chr5:34949299-34949799->arhgef28a	Act	0.295973	0.38335	0
rorb	M00818_2.00	chr5:34949299-34949799	arhgef28a	0.112632	Body	0.102492	rorb->chr5:34949299-34949799->arhgef28a	Act	0.518637	0.38335	0
rarga	M02706_2.00	chr5:34949299-34949799	arhgef28a	0.27521	Body	0.416342	rarga->chr5:34949299-34949799->arhgef28a	Act	0.281721	0.38335	0
nr3c2	M09603_2.00	chr5:34949299-34949799	arhgef28a	0.253011	Body	0.508863	nr3c2->chr5:34949299-34949799->arhgef28a	Act	0.390207	0.38335	0
tcf7l2	M11337_2.00	chr5:34949299-34949799	arhgef28a	0.142318	Body	0.456726	tcf7l2->chr5:34949299-34949799->arhgef28a	Act	0.32183	0.38335	0
rarga	M04484	chr5:34724435-34724935	arhgef28a	0.0956822	Inter	0.416342	rarga->chr5:34724435-34724935->arhgef28a	Act	0.281721	0.38335	0
rarab	M03394_2.00	chr5:34724435-34724935	arhgef28a	0.0649601	Inter	0.559234	rarab->chr5:34724435-34724935->arhgef28a	Act	0.271116	0.38335	0
rorb	M03394_2.00	chr5:34724435-34724935	arhgef28a	0.115117	Inter	0.102492	rorb->chr5:34724435-34724935->arhgef28a	Act	0.518637	0.38335	0
rxraa	M03394_2.00	chr5:34724435-34724935	arhgef28a	0.111611	Inter	0.458008	rxraa->chr5:34724435-34724935->arhgef28a	Act	0.560488	0.38335	0
sox13	M06559_2.00	chr5:34724435-34724935	arhgef28a	0.486861	Inter	0.464435	sox13->chr5:34724435-34724935->arhgef28a	Act	0.295973	0.38335	0
epas1b	M09906	chr5:35111023-35111523	arhgef28a	0.116161	Inter	0.673272	epas1b->chr5:35111023-35111523->arhgef28a	Act	0.470616	0.38335	1.7184
sox13	M09787	chr5:34963911-34964411	arhgef28a	0.540612	TSS	0.464435	sox13->chr5:34963911-34964411->arhgef28a	Act	0.295973	0.38335	0
lhx2b	M05061_2.00	chr5:34963911-34964411	arhgef28a	0.1785	TSS	0.573308	lhx2b->chr5:34963911-34964411->arhgef28a	Act	0.275906	0.38335	0
ar	M09589	chr5:34965112-34965612	arhgef28a	0.273931	TSS	0.650269	ar->chr5:34965112-34965612->arhgef28a	Act	0.456809	0.38335	0
sox13	M00201_2.00	chr5:34965112-34965612	arhgef28a	0.235587	TSS	0.464435	sox13->chr5:34965112-34965612->arhgef28a	Act	0.295973	0.38335	0
nr3c2	M09266_2.00	chr5:34965112-34965612	arhgef28a	0.274293	TSS	0.508863	nr3c2->chr5:34965112-34965612->arhgef28a	Act	0.390207	0.38335	0
rorb	M05653_2.00	chr2:16226532-16227032	arhgef4	0.0723964	Body	0.506112	rorb->chr2:16226532-16227032->arhgef4	Act	0.518637	0.909128	0
rarab	M05880_2.00	chr2:16226532-16227032	arhgef4	0.365553	Body	0.512457	rarab->chr2:16226532-16227032->arhgef4	Act	0.271116	0.909128	0
rxraa	M05880_2.00	chr2:16226532-16227032	arhgef4	0.401567	Body	0.526257	rxraa->chr2:16226532-16227032->arhgef4	Act	0.560488	0.909128	0
rxraa	M02262	chr2:16253078-16253578	arhgef4	0.12773	Body	0.526257	rxraa->chr2:16253078-16253578->arhgef4	Act	0.560488	0.909128	0
lhx2b	M05040_2.00	chr2:16253078-16253578	arhgef4	0.27414	Body	0.560414	lhx2b->chr2:16253078-16253578->arhgef4	Act	0.275906	0.909128	0
nr2e1	M06431_2.00	chr2:16253078-16253578	arhgef4	0.0750346	Body	0.504786	nr2e1->chr2:16253078-16253578->arhgef4	Act	0.345467	0.909128	0
rorb	M09297_2.00	chr2:16253078-16253578	arhgef4	0.110429	Body	0.506112	rorb->chr2:16253078-16253578->arhgef4	Act	0.518637	0.909128	0
rarab	M09317_2.00	chr2:16253078-16253578	arhgef4	0.081656	Body	0.512457	rarab->chr2:16253078-16253578->arhgef4	Act	0.271116	0.909128	0
sox13	M09388_2.00	chr2:16253078-16253578	arhgef4	0.582094	Body	0.712236	sox13->chr2:16253078-16253578->arhgef4	Act	0.295973	0.909128	0
rxraa	M04787	chr2:16266491-16266991	arhgef4	0.0608	Body	0.526257	rxraa->chr2:16266491-16266991->arhgef4	Act	0.560488	0.909128	0
lhx2b	M07047	chr2:16266491-16266991	arhgef4	0.193645	Body	0.560414	lhx2b->chr2:16266491-16266991->arhgef4	Act	0.275906	0.909128	0
gli2a	M07292	chr2:16266491-16266991	arhgef4	0.122262	Body	0.804881	gli2a->chr2:16266491-16266991->arhgef4	Act	0.398694	0.909128	0
nfixa	M02050	chr2:16333878-16334378	arhgef4	0.351999	Body	0.403558	nfixa->chr2:16333878-16334378->arhgef4	Act	0.512419	0.909128	1.36252
sox13	M09387_2.00	chr2:16333878-16334378	arhgef4	0.605686	Body	0.712236	sox13->chr2:16333878-16334378->arhgef4	Act	0.295973	0.909128	1.36252
tead1a	M09437_2.00	chr2:16333878-16334378	arhgef4	0.339684	Body	0.497045	tead1a->chr2:16333878-16334378->arhgef4	Act	0.371967	0.909128	1.36252
sox13	M09787	chr2:16342172-16342672	arhgef4	0.540612	Body	0.712236	sox13->chr2:16342172-16342672->arhgef4	Act	0.295973	0.909128	0
rxraa	M10055	chr2:16342172-16342672	arhgef4	0.305927	Body	0.526257	rxraa->chr2:16342172-16342672->arhgef4	Act	0.560488	0.909128	0
lhx2b	M00279_2.00	chr2:16342172-16342672	arhgef4	0.163121	Body	0.560414	lhx2b->chr2:16342172-16342672->arhgef4	Act	0.275906	0.909128	0
rarab	M09273_2.00	chr2:16342172-16342672	arhgef4	0.144277	Body	0.512457	rarab->chr2:16342172-16342672->arhgef4	Act	0.271116	0.909128	0
rorb	M09273_2.00	chr2:16342172-16342672	arhgef4	0.113091	Body	0.506112	rorb->chr2:16342172-16342672->arhgef4	Act	0.518637	0.909128	0
tead1a	M04142	chr2:16358760-16359260	arhgef4	0.148445	Body	0.497045	tead1a->chr2:16358760-16359260->arhgef4	Act	0.371967	0.909128	0
rxraa	M09003	chr2:16358760-16359260	arhgef4	0.0820744	Body	0.526257	rxraa->chr2:16358760-16359260->arhgef4	Act	0.560488	0.909128	0
rorb	M05565_2.00	chr2:16358760-16359260	arhgef4	0.0777675	Body	0.506112	rorb->chr2:16358760-16359260->arhgef4	Act	0.518637	0.909128	0
rarab	M05650_2.00	chr2:16358760-16359260	arhgef4	0.0903116	Body	0.512457	rarab->chr2:16358760-16359260->arhgef4	Act	0.271116	0.909128	0
lhx2b	M06277_2.00	chr2:16358760-16359260	arhgef4	0.0501803	Body	0.560414	lhx2b->chr2:16358760-16359260->arhgef4	Act	0.275906	0.909128	0
nr2e1	M08220_2.00	chr2:16358760-16359260	arhgef4	0.0537304	Body	0.504786	nr2e1->chr2:16358760-16359260->arhgef4	Act	0.345467	0.909128	0
lhx2b	M07047	chr2:16216930-16217430	arhgef4	0.193645	TSS	0.560414	lhx2b->chr2:16216930-16217430->arhgef4	Act	0.275906	0.909128	0
sox13	M08899	chr2:16216930-16217430	arhgef4	0.431399	TSS	0.712236	sox13->chr2:16216930-16217430->arhgef4	Act	0.295973	0.909128	0
nr2e1	M08220_2.00	chr2:16216930-16217430	arhgef4	0.0537304	TSS	0.504786	nr2e1->chr2:16216930-16217430->arhgef4	Act	0.345467	0.909128	0
gli2a	M01703	chr2:16254595-16255095	arhgef4	0.15947	TSS	0.804881	gli2a->chr2:16254595-16255095->arhgef4	Act	0.398694	0.909128	1.1391
nr2e1	M00182_2.00	chr2:16254595-16255095	arhgef4	0.208183	TSS	0.504786	nr2e1->chr2:16254595-16255095->arhgef4	Act	0.345467	0.909128	1.1391
nfixa	M09381_2.00	chr2:16254595-16255095	arhgef4	0.361709	TSS	0.403558	nfixa->chr2:16254595-16255095->arhgef4	Act	0.512419	0.909128	1.1391
tcf7l1b	M09392_2.00	chr2:16254595-16255095	arhgef4	0.429509	TSS	0.569445	tcf7l1b->chr2:16254595-16255095->arhgef4	Act	0.390873	0.909128	1.1391
tcf7l2	M09392_2.00	chr2:16254595-16255095	arhgef4	0.465533	TSS	0.570329	tcf7l2->chr2:16254595-16255095->arhgef4	Act	0.32183	0.909128	1.1391
gli2a	M01703	chr2:16255120-16255620	arhgef4	0.15947	TSS	0.804881	gli2a->chr2:16255120-16255620->arhgef4	Act	0.398694	0.909128	0
tcf7l1b	M09392_2.00	chr2:16255120-16255620	arhgef4	0.429509	TSS	0.569445	tcf7l1b->chr2:16255120-16255620->arhgef4	Act	0.390873	0.909128	0
tcf7l2	M09392_2.00	chr2:16255120-16255620	arhgef4	0.465533	TSS	0.570329	tcf7l2->chr2:16255120-16255620->arhgef4	Act	0.32183	0.909128	0
tcf7l1a	M00805	chr12:8184828-8185328	arid5b	0.230037	Body	0.397912	tcf7l1a->chr12:8184828-8185328->arid5b	Act	0.287814	0.474382	0
rorb	M00818_2.00	chr12:8184828-8185328	arid5b	0.112632	Body	0.4984	rorb->chr12:8184828-8185328->arid5b	Act	0.518637	0.474382	0
rorb	M03372_2.00	chr12:8188076-8188576	arid5b	0.0618034	Body	0.4984	rorb->chr12:8188076-8188576->arid5b	Act	0.518637	0.474382	0
sox13	M03522_2.00	chr12:8188076-8188576	arid5b	0.238988	Body	0.557567	sox13->chr12:8188076-8188576->arid5b	Act	0.295973	0.474382	0
tead1a	M06455_2.00	chr12:8188076-8188576	arid5b	0.0883063	Body	0.622893	tead1a->chr12:8188076-8188576->arid5b	Act	0.371967	0.474382	0
tcf7l1a	M00805	chr12:8197506-8198006	arid5b	0.230037	Body	0.397912	tcf7l1a->chr12:8197506-8198006->arid5b	Act	0.287814	0.474382	0
sox13	M06449_2.00	chr12:8197506-8198006	arid5b	0.556483	Body	0.557567	sox13->chr12:8197506-8198006->arid5b	Act	0.295973	0.474382	0
tcf7l1a	M00805	chr12:8271527-8272027	arid5b	0.230037	Body	0.397912	tcf7l1a->chr12:8271527-8272027->arid5b	Act	0.287814	0.474382	0
rfx2	M00975	chr12:8271527-8272027	arid5b	0.211825	Body	0.362243	rfx2->chr12:8271527-8272027->arid5b	Act	0.396514	0.474382	0
sox13	M01014	chr12:8271527-8272027	arid5b	0.382335	Body	0.557567	sox13->chr12:8271527-8272027->arid5b	Act	0.295973	0.474382	0
foxo1a	M03823	chr12:8271527-8272027	arid5b	0.456812	Body	0.530893	foxo1a->chr12:8271527-8272027->arid5b	Act	0.378908	0.474382	0
foxo1a	M03823	chr12:8347023-8347523	arid5b	0.456812	Body	0.530893	foxo1a->chr12:8347023-8347523->arid5b	Act	0.378908	0.474382	0
plagl2	M05510	chr12:8347023-8347523	arid5b	0.139461	Body	0.488953	plagl2->chr12:8347023-8347523->arid5b	Act	0.329948	0.474382	0
vezf1a	M10107	chr12:8347023-8347523	arid5b	0.377438	Body	0.367297	vezf1a->chr12:8347023-8347523->arid5b	Act	0.393767	0.474382	0
gli2a	M04402_2.00	chr12:8347023-8347523	arid5b	0.0887611	Body	0.755282	gli2a->chr12:8347023-8347523->arid5b	Act	0.398694	0.474382	0
rorb	M09295_2.00	chr12:8347023-8347523	arid5b	0.0960606	Body	0.4984	rorb->chr12:8347023-8347523->arid5b	Act	0.518637	0.474382	0
foxo1a	M03823	chr12:7936607-7937107	arid5b	0.456812	Inter	0.530893	foxo1a->chr12:7936607-7937107->arid5b	Act	0.378908	0.474382	0
vezf1a	M10107	chr12:7936607-7937107	arid5b	0.377438	Inter	0.367297	vezf1a->chr12:7936607-7937107->arid5b	Act	0.393767	0.474382	0
rorb	M03934_2.00	chr12:7936607-7937107	arid5b	0.0955536	Inter	0.4984	rorb->chr12:7936607-7937107->arid5b	Act	0.518637	0.474382	0
foxo1a	M04257	chr12:7979469-7979969	arid5b	0.133348	Inter	0.530893	foxo1a->chr12:7979469-7979969->arid5b	Act	0.378908	0.474382	0
rorb	M00181_2.00	chr12:7979469-7979969	arid5b	0.1411	Inter	0.4984	rorb->chr12:7979469-7979969->arid5b	Act	0.518637	0.474382	0
foxo1a	M08241	chr12:8143621-8144121	arid5b	0.185905	Inter	0.530893	foxo1a->chr12:8143621-8144121->arid5b	Act	0.378908	0.474382	0
sox13	M03974_2.00	chr12:8143621-8144121	arid5b	0.22396	Inter	0.557567	sox13->chr12:8143621-8144121->arid5b	Act	0.295973	0.474382	0
stat3	M01220	chr12:8149007-8149507	arid5b	0.267055	Inter	0.416071	stat3->chr12:8149007-8149507->arid5b	Act	0.327768	0.474382	0
foxo1a	M03823	chr12:8149007-8149507	arid5b	0.456812	Inter	0.530893	foxo1a->chr12:8149007-8149507->arid5b	Act	0.378908	0.474382	0
vezf1a	M10107	chr12:8149007-8149507	arid5b	0.377438	Inter	0.367297	vezf1a->chr12:8149007-8149507->arid5b	Act	0.393767	0.474382	0
sox13	M03489_2.00	chr12:8149007-8149507	arid5b	0.167944	Inter	0.557567	sox13->chr12:8149007-8149507->arid5b	Act	0.295973	0.474382	0
nfixa	M07364	chr7:65931562-65932062	arntl1b	0.261875	Inter	0.0623936	nfixa->chr7:65931562-65932062->arntl1b	Act	0.512419	0.567148	0
nr3c2	M09603_2.00	chr7:65931562-65932062	arntl1b	0.253011	Inter	0.127027	nr3c2->chr7:65931562-65932062->arntl1b	Act	0.390207	0.567148	0
rorb	M01722	chr7:66047800-66048300	arntl1b	0.411551	TSS	0.0772828	rorb->chr7:66047800-66048300->arntl1b	Act	0.518637	0.567148	0.694885
rarab	M00819_2.00	chr7:66047800-66048300	arntl1b	0.0578609	TSS	0.0890399	rarab->chr7:66047800-66048300->arntl1b	Act	0.271116	0.567148	0.694885
nr3c2	M09288_2.00	chr7:66047800-66048300	arntl1b	0.248185	TSS	0.127027	nr3c2->chr7:66047800-66048300->arntl1b	Act	0.390207	0.567148	0.694885
rorb	M05617_2.00	chr18:15599146-15599646	arntl2	0.0514061	Body	0.181671	rorb->chr18:15599146-15599646->arntl2	Act	0.518637	0.257564	0.880074
rorb	M02397_2.00	chr18:15607407-15607907	arntl2	0.0917707	Body	0.181671	rorb->chr18:15607407-15607907->arntl2	Act	0.518637	0.257564	0
tead1a	M08175_2.00	chr18:15607407-15607907	arntl2	0.373477	Body	0.0824471	tead1a->chr18:15607407-15607907->arntl2	Act	0.371967	0.257564	0
rorb	M01722	chr18:15608049-15608549	arntl2	0.411551	Body	0.181671	rorb->chr18:15608049-15608549->arntl2	Act	0.518637	0.257564	1.25651
tead1a	M08175_2.00	chr18:15608049-15608549	arntl2	0.373477	Body	0.0824471	tead1a->chr18:15608049-15608549->arntl2	Act	0.371967	0.257564	1.25651
rorb	M01722	chr18:15609748-15610248	arntl2	0.411551	Body	0.181671	rorb->chr18:15609748-15610248->arntl2	Act	0.518637	0.257564	0
vezf1a	M10107	chr18:15609748-15610248	arntl2	0.377438	Body	0.173232	vezf1a->chr18:15609748-15610248->arntl2	Act	0.393767	0.257564	0
vezf1a	M10107	chr18:15610254-15610754	arntl2	0.377438	TSS	0.173232	vezf1a->chr18:15610254-15610754->arntl2	Act	0.393767	0.257564	1.07414
rorb	M05623_2.00	chr18:15610254-15610754	arntl2	0.158486	TSS	0.181671	rorb->chr18:15610254-15610754->arntl2	Act	0.518637	0.257564	1.07414
zic2b	M02940	chr17:35108457-35108957	asap2a	0.140495	Body	0.15586	zic2b->chr17:35108457-35108957->asap2a	Act	0.256339	0.749635	0
tcf7l1a	M01594	chr17:35123824-35124324	asap2a	0.313715	Body	0.120894	tcf7l1a->chr17:35123824-35124324->asap2a	Act	0.287814	0.749635	0
zic2b	M02836	chr17:35123824-35124324	asap2a	0.11199	Body	0.15586	zic2b->chr17:35123824-35124324->asap2a	Act	0.256339	0.749635	0
fosl2	M07092	chr17:27222394-27222894	asap3	0.578819	Body	0.37945	fosl2->chr17:27222394-27222894->asap3	Act	0.273506	0.285636	2.18205
foxo1a	M07094	chr17:27222394-27222894	asap3	0.0631126	Body	0.35223	foxo1a->chr17:27222394-27222894->asap3	Act	0.378908	0.285636	2.18205
vezf1a	M10107	chr17:27222394-27222894	asap3	0.377438	Body	0.249901	vezf1a->chr17:27222394-27222894->asap3	Act	0.393767	0.285636	2.18205
nr2e1	M06429_2.00	chr17:27222394-27222894	asap3	0.0683291	Body	0.338612	nr2e1->chr17:27222394-27222894->asap3	Act	0.345467	0.285636	2.18205
rarga	M09313_2.00	chr17:27222394-27222894	asap3	0.388916	Body	0.296704	rarga->chr17:27222394-27222894->asap3	Act	0.281721	0.285636	2.18205
rorb	M09313_2.00	chr17:27222394-27222894	asap3	0.573618	Body	0.329371	rorb->chr17:27222394-27222894->asap3	Act	0.518637	0.285636	2.18205
foxo1a	M03823	chr17:27233753-27234253	asap3	0.456812	Body	0.35223	foxo1a->chr17:27233753-27234253->asap3	Act	0.378908	0.285636	1.2163
sox13	M01026_2.00	chr17:27233753-27234253	asap3	0.478959	Body	0.472071	sox13->chr17:27233753-27234253->asap3	Act	0.295973	0.285636	1.2163
erfl3	M07950_2.00	chr17:27233753-27234253	asap3	0.068887	Body	0.387871	erfl3->chr17:27233753-27234253->asap3	Act	0.412952	0.285636	1.2163
rorb	M08966	chr17:27235530-27236030	asap3	0.562027	Body	0.329371	rorb->chr17:27235530-27236030->asap3	Act	0.518637	0.285636	1.29115
rfx2	M09651	chr17:27235530-27236030	asap3	0.34919	Body	0.382765	rfx2->chr17:27235530-27236030->asap3	Act	0.396514	0.285636	1.29115
rarga	M03392_2.00	chr17:27235530-27236030	asap3	0.0584959	Body	0.296704	rarga->chr17:27235530-27236030->asap3	Act	0.281721	0.285636	1.29115
sox13	M03487_2.00	chr17:27235530-27236030	asap3	0.14668	Body	0.472071	sox13->chr17:27235530-27236030->asap3	Act	0.295973	0.285636	1.29115
tcf7l1a	M00805	chr17:27416196-27416696	asap3	0.230037	Inter	0.352259	tcf7l1a->chr17:27416196-27416696->asap3	Act	0.287814	0.285636	0
fosl2	M00925	chr17:27416196-27416696	asap3	0.55321	Inter	0.37945	fosl2->chr17:27416196-27416696->asap3	Act	0.273506	0.285636	0
sox13	M00214_2.00	chr17:27416196-27416696	asap3	0.102777	Inter	0.472071	sox13->chr17:27416196-27416696->asap3	Act	0.295973	0.285636	0
tcf7l1b	M00712_2.00	chr17:27416196-27416696	asap3	0.313419	Inter	0.385306	tcf7l1b->chr17:27416196-27416696->asap3	Act	0.390873	0.285636	0
rorb	M03934_2.00	chr17:27416196-27416696	asap3	0.0955536	Inter	0.329371	rorb->chr17:27416196-27416696->asap3	Act	0.518637	0.285636	0
nr2e1	M03936_2.00	chr17:27416196-27416696	asap3	0.12788	Inter	0.338612	nr2e1->chr17:27416196-27416696->asap3	Act	0.345467	0.285636	0
tead1a	M03996_2.00	chr17:27416196-27416696	asap3	0.327926	Inter	0.396429	tead1a->chr17:27416196-27416696->asap3	Act	0.371967	0.285636	0
tbx4	M08044_2.00	chr17:27416196-27416696	asap3	0.0623383	Inter	0.364365	tbx4->chr17:27416196-27416696->asap3	Act	0.630816	0.285636	0
rarga	M09301_2.00	chr17:27416196-27416696	asap3	0.15759	Inter	0.296704	rarga->chr17:27416196-27416696->asap3	Act	0.281721	0.285636	0
foxo1a	M03021_2.00	chr17:27444532-27445032	asap3	0.321064	Inter	0.35223	foxo1a->chr17:27444532-27445032->asap3	Act	0.378908	0.285636	0
rfx2	M09651	chr17:27234882-27235382	asap3	0.34919	TSS	0.382765	rfx2->chr17:27234882-27235382->asap3	Act	0.396514	0.285636	0
foxo1a	M10563_2.00	chr17:27234882-27235382	asap3	0.105137	TSS	0.35223	foxo1a->chr17:27234882-27235382->asap3	Act	0.378908	0.285636	0
tcf7l1a	M00805	chr4:17416834-17417334	ascl1a	0.230037	Body	0.363373	tcf7l1a->chr4:17416834-17417334->ascl1a	Act	0.287814	0.349897	1.33971
rorb	M03376_2.00	chr4:17416834-17417334	ascl1a	0.0542008	Body	0.216812	rorb->chr4:17416834-17417334->ascl1a	Act	0.518637	0.349897	1.33971
fosl2	M08914	chr4:17417379-17417879	ascl1a	0.579759	Body	0.449339	fosl2->chr4:17417379-17417879->ascl1a	Act	0.273506	0.349897	0
rorb	M03376_2.00	chr4:17417379-17417879	ascl1a	0.0542008	Body	0.216812	rorb->chr4:17417379-17417879->ascl1a	Act	0.518637	0.349897	0
tcf7l1a	M00805	chr4:17418424-17418924	ascl1a	0.230037	Body	0.363373	tcf7l1a->chr4:17418424-17418924->ascl1a	Act	0.287814	0.349897	0
fosl2	M00924	chr4:17418424-17418924	ascl1a	0.565179	Body	0.449339	fosl2->chr4:17418424-17418924->ascl1a	Act	0.273506	0.349897	0
foxj1a	M00161_2.00	chr4:17170852-17171352	ascl1a	0.063146	Inter	0.373348	foxj1a->chr4:17170852-17171352->ascl1a	Act	0.450403	0.349897	0
sox13	M02488_2.00	chr4:17170852-17171352	ascl1a	0.259841	Inter	0.268115	sox13->chr4:17170852-17171352->ascl1a	Act	0.295973	0.349897	0
rorb	M09608_2.00	chr4:17170852-17171352	ascl1a	0.0885292	Inter	0.216812	rorb->chr4:17170852-17171352->ascl1a	Act	0.518637	0.349897	0
rorb	M08966	chr4:17206910-17207410	ascl1a	0.562027	Inter	0.216812	rorb->chr4:17206910-17207410->ascl1a	Act	0.518637	0.349897	0
sox13	M09397_2.00	chr4:17206910-17207410	ascl1a	0.583807	Inter	0.268115	sox13->chr4:17206910-17207410->ascl1a	Act	0.295973	0.349897	0
tcf7l1a	M09400_2.00	chr4:17206910-17207410	ascl1a	0.355136	Inter	0.363373	tcf7l1a->chr4:17206910-17207410->ascl1a	Act	0.287814	0.349897	0
vezf1a	M10107	chr4:17210684-17211184	ascl1a	0.377438	Inter	0.376445	vezf1a->chr4:17210684-17211184->ascl1a	Act	0.393767	0.349897	0
rorb	M02404_2.00	chr4:17210684-17211184	ascl1a	0.204569	Inter	0.216812	rorb->chr4:17210684-17211184->ascl1a	Act	0.518637	0.349897	0
sox13	M05759_2.00	chr4:17210684-17211184	ascl1a	0.445289	Inter	0.268115	sox13->chr4:17210684-17211184->ascl1a	Act	0.295973	0.349897	0
vezf1a	M10107	chr4:17211295-17211795	ascl1a	0.377438	Inter	0.376445	vezf1a->chr4:17211295-17211795->ascl1a	Act	0.393767	0.349897	1.28834
rorb	M02404_2.00	chr4:17211295-17211795	ascl1a	0.204569	Inter	0.216812	rorb->chr4:17211295-17211795->ascl1a	Act	0.518637	0.349897	1.28834
erfl3	M04721_2.00	chr4:17211295-17211795	ascl1a	0.107926	Inter	0.36806	erfl3->chr4:17211295-17211795->ascl1a	Act	0.412952	0.349897	1.28834
sox13	M05769_2.00	chr4:17219500-17220000	ascl1a	0.292601	Inter	0.268115	sox13->chr4:17219500-17220000->ascl1a	Act	0.295973	0.349897	0
fosl2	M09616	chr4:17224604-17225104	ascl1a	0.578578	Inter	0.449339	fosl2->chr4:17224604-17225104->ascl1a	Act	0.273506	0.349897	0
sox13	M03483_2.00	chr4:17224604-17225104	ascl1a	0.0999395	Inter	0.268115	sox13->chr4:17224604-17225104->ascl1a	Act	0.295973	0.349897	0
gli2a	M05331	chr4:17227029-17227529	ascl1a	0.190092	Inter	0.330901	gli2a->chr4:17227029-17227529->ascl1a	Act	0.398694	0.349897	0
vezf1a	M10107	chr4:17227029-17227529	ascl1a	0.377438	Inter	0.376445	vezf1a->chr4:17227029-17227529->ascl1a	Act	0.393767	0.349897	0
e2f1	M10209	chr4:17227029-17227529	ascl1a	0.159068	Inter	0.232801	e2f1->chr4:17227029-17227529->ascl1a	Act	0.349346	0.349897	0
sox13	M05751_2.00	chr4:17227029-17227529	ascl1a	0.590074	Inter	0.268115	sox13->chr4:17227029-17227529->ascl1a	Act	0.295973	0.349897	0
erfl3	M09052_2.00	chr4:17227029-17227529	ascl1a	0.173374	Inter	0.36806	erfl3->chr4:17227029-17227529->ascl1a	Act	0.412952	0.349897	0
rorb	M09317_2.00	chr4:17227029-17227529	ascl1a	0.202375	Inter	0.216812	rorb->chr4:17227029-17227529->ascl1a	Act	0.518637	0.349897	0
foxj1a	M01987_2.00	chr4:17232661-17233161	ascl1a	0.127758	Inter	0.373348	foxj1a->chr4:17232661-17233161->ascl1a	Act	0.450403	0.349897	0
sox13	M11331_2.00	chr4:17232661-17233161	ascl1a	0.537607	Inter	0.268115	sox13->chr4:17232661-17233161->ascl1a	Act	0.295973	0.349897	0
e2f1	M00050	chr4:17235790-17236290	ascl1a	0.156695	Inter	0.232801	e2f1->chr4:17235790-17236290->ascl1a	Act	0.349346	0.349897	0
zic2b	M02894_2.00	chr4:17235790-17236290	ascl1a	0.211149	Inter	0.467163	zic2b->chr4:17235790-17236290->ascl1a	Act	0.256339	0.349897	0
rorb	M05565_2.00	chr4:17235790-17236290	ascl1a	0.0777675	Inter	0.216812	rorb->chr4:17235790-17236290->ascl1a	Act	0.518637	0.349897	0
erfl3	M09055_2.00	chr4:17235790-17236290	ascl1a	0.378177	Inter	0.36806	erfl3->chr4:17235790-17236290->ascl1a	Act	0.412952	0.349897	0
tcf7l1a	M00805	chr4:17306922-17307422	ascl1a	0.230037	Inter	0.363373	tcf7l1a->chr4:17306922-17307422->ascl1a	Act	0.287814	0.349897	0
gli2a	M01703	chr4:17306922-17307422	ascl1a	0.15947	Inter	0.330901	gli2a->chr4:17306922-17307422->ascl1a	Act	0.398694	0.349897	0
zic2b	M02940	chr4:17306922-17307422	ascl1a	0.140495	Inter	0.467163	zic2b->chr4:17306922-17307422->ascl1a	Act	0.256339	0.349897	0
erfl3	M09058_2.00	chr4:17306922-17307422	ascl1a	0.383132	Inter	0.36806	erfl3->chr4:17306922-17307422->ascl1a	Act	0.412952	0.349897	0
sox13	M09387_2.00	chr4:17399878-17400378	ascl1a	0.605686	Inter	0.268115	sox13->chr4:17399878-17400378->ascl1a	Act	0.295973	0.349897	0
foxj1a	M01987_2.00	chr4:17415024-17415524	ascl1a	0.127758	Inter	0.373348	foxj1a->chr4:17415024-17415524->ascl1a	Act	0.450403	0.349897	0.844147
sox13	M11331_2.00	chr4:17415024-17415524	ascl1a	0.537607	Inter	0.268115	sox13->chr4:17415024-17415524->ascl1a	Act	0.295973	0.349897	0.844147
sox13	M03545_2.00	chr4:17419209-17419709	ascl1a	0.143025	Inter	0.268115	sox13->chr4:17419209-17419709->ascl1a	Act	0.295973	0.349897	0.857826
e2f3	M01965_2.00	chr3:49514127-49514627	asf1ba	0.106618	Body	0.201017	e2f3->chr3:49514127-49514627->asf1ba	Act	0.374128	0.336032	1.0376
sox13	M03500_2.00	chr15:4400031-4400531	atp1b3b	0.0668148	Body	0.38341	sox13->chr15:4400031-4400531->atp1b3b	Act	0.295973	0.327615	0
gli2a	M08023_2.00	chr15:4400031-4400531	atp1b3b	0.061166	Body	0.40202	gli2a->chr15:4400031-4400531->atp1b3b	Act	0.398694	0.327615	0
rxraa	M00242	chr15:4405145-4405645	atp1b3b	0.18752	Body	0.255237	rxraa->chr15:4405145-4405645->atp1b3b	Act	0.560488	0.327615	1.33679
foxo1a	M04257	chr15:4405145-4405645	atp1b3b	0.133348	Body	0.267644	foxo1a->chr15:4405145-4405645->atp1b3b	Act	0.378908	0.327615	1.33679
sox13	M05759_2.00	chr15:4405145-4405645	atp1b3b	0.445289	Body	0.38341	sox13->chr15:4405145-4405645->atp1b3b	Act	0.295973	0.327615	1.33679
foxo1a	M04257	chr15:4414330-4414830	atp1b3b	0.133348	Body	0.267644	foxo1a->chr15:4414330-4414830->atp1b3b	Act	0.378908	0.327615	0.927407
klf12b	M08857_2.00	chr15:4414330-4414830	atp1b3b	0.0584093	Body	0.274284	klf12b->chr15:4414330-4414830->atp1b3b	Act	0.342959	0.327615	0.927407
sox13	M03510_2.00	chr15:4414987-4415487	atp1b3b	0.143298	TSS	0.38341	sox13->chr15:4414987-4415487->atp1b3b	Act	0.295973	0.327615	0
creb5b	M08827_2.00	chr15:4414987-4415487	atp1b3b	0.3141	TSS	0.110294	creb5b->chr15:4414987-4415487->atp1b3b	Act	0.371766	0.327615	0
sox13	M01014	chr15:4415611-4416111	atp1b3b	0.382335	TSS	0.38341	sox13->chr15:4415611-4416111->atp1b3b	Act	0.295973	0.327615	0
foxo1a	M03823	chr15:4415611-4416111	atp1b3b	0.456812	TSS	0.267644	foxo1a->chr15:4415611-4416111->atp1b3b	Act	0.378908	0.327615	0
tcf7l2	M07136	chr15:4415611-4416111	atp1b3b	0.232667	TSS	0.290431	tcf7l2->chr15:4415611-4416111->atp1b3b	Act	0.32183	0.327615	0
ascl1a	M09767	chr8:11700833-11701333	atp2a2a	0.0571486	Body	0.202332	ascl1a->chr8:11700833-11701333->atp2a2a	Act	0.349897	0.299899	0
vezf1a	M10107	chr8:11700833-11701333	atp2a2a	0.377438	Body	0.188836	vezf1a->chr8:11700833-11701333->atp2a2a	Act	0.393767	0.299899	0
sox13	M05766_2.00	chr8:11700833-11701333	atp2a2a	0.503151	Body	0.15616	sox13->chr8:11700833-11701333->atp2a2a	Act	0.295973	0.299899	0
tcf7l1b	M10095	chr8:11843657-11844157	atp2a2a	0.13653	Inter	0.1853	tcf7l1b->chr8:11843657-11844157->atp2a2a	Act	0.390873	0.299899	0
vezf1a	M10107	chr8:11843657-11844157	atp2a2a	0.377438	Inter	0.188836	vezf1a->chr8:11843657-11844157->atp2a2a	Act	0.393767	0.299899	0
foxj1a	M01987_2.00	chr8:11843657-11844157	atp2a2a	0.127758	Inter	0.146442	foxj1a->chr8:11843657-11844157->atp2a2a	Act	0.450403	0.299899	0
sox13	M02719_2.00	chr8:11843657-11844157	atp2a2a	0.478973	Inter	0.15616	sox13->chr8:11843657-11844157->atp2a2a	Act	0.295973	0.299899	0
erfl3	M08111_2.00	chr8:11843657-11844157	atp2a2a	0.357467	Inter	0.179521	erfl3->chr8:11843657-11844157->atp2a2a	Act	0.412952	0.299899	0
tcf7l1b	M10095	chr8:11844160-11844660	atp2a2a	0.13653	Inter	0.1853	tcf7l1b->chr8:11844160-11844660->atp2a2a	Act	0.390873	0.299899	0
vezf1a	M10107	chr8:11844160-11844660	atp2a2a	0.377438	Inter	0.188836	vezf1a->chr8:11844160-11844660->atp2a2a	Act	0.393767	0.299899	0
sox13	M03485_2.00	chr8:11844160-11844660	atp2a2a	0.159921	Inter	0.15616	sox13->chr8:11844160-11844660->atp2a2a	Act	0.295973	0.299899	0
erfl3	M08111_2.00	chr8:11844160-11844660	atp2a2a	0.357467	Inter	0.179521	erfl3->chr8:11844160-11844660->atp2a2a	Act	0.412952	0.299899	0
ascl1a	M09767	chr8:11686906-11687406	atp2a2a	0.0571486	TSS	0.202332	ascl1a->chr8:11686906-11687406->atp2a2a	Act	0.349897	0.299899	0
sox13	M06449_2.00	chr8:11686906-11687406	atp2a2a	0.556483	TSS	0.15616	sox13->chr8:11686906-11687406->atp2a2a	Act	0.295973	0.299899	0
fosl2	M08941	chr8:11687568-11688068	atp2a2a	0.0979455	TSS	0.186124	fosl2->chr8:11687568-11688068->atp2a2a	Act	0.273506	0.299899	0
sox13	M00070_2.00	chr8:11687568-11688068	atp2a2a	0.177426	TSS	0.15616	sox13->chr8:11687568-11688068->atp2a2a	Act	0.295973	0.299899	0
ascl1a	M08730_2.00	chr8:11687568-11688068	atp2a2a	0.100538	TSS	0.202332	ascl1a->chr8:11687568-11688068->atp2a2a	Act	0.349897	0.299899	0
nfixa	M02050	chr5:41707548-41708048	atxn2	0.351999	Body	0.163799	nfixa->chr5:41707548-41708048->atxn2	Act	0.512419	0.26329	1.35548
rxraa	M04787	chr5:41707548-41708048	atxn2	0.0608	Body	0.214504	rxraa->chr5:41707548-41708048->atxn2	Act	0.560488	0.26329	1.35548
rarab	M02706_2.00	chr5:41707548-41708048	atxn2	0.315051	Body	0.157516	rarab->chr5:41707548-41708048->atxn2	Act	0.271116	0.26329	1.35548
rxraa	M00515	chr5:41709024-41709524	atxn2	0.078754	Body	0.214504	rxraa->chr5:41709024-41709524->atxn2	Act	0.560488	0.26329	0
smad3b	M07126	chr5:41709024-41709524	atxn2	0.0703293	Body	0.0984106	smad3b->chr5:41709024-41709524->atxn2	Act	0.309202	0.26329	0
rarab	M09276_2.00	chr5:41709024-41709524	atxn2	0.367431	Body	0.157516	rarab->chr5:41709024-41709524->atxn2	Act	0.271116	0.26329	0
rxraa	M00966	chr5:41591094-41591594	atxn2	0.134742	Inter	0.214504	rxraa->chr5:41591094-41591594->atxn2	Act	0.560488	0.26329	2.77841
nfixa	M02050	chr5:41910574-41911074	atxn2	0.351999	Inter	0.163799	nfixa->chr5:41910574-41911074->atxn2	Act	0.512419	0.26329	0
rxraa	M00818_2.00	chr5:41910574-41911074	atxn2	0.10252	Inter	0.214504	rxraa->chr5:41910574-41911074->atxn2	Act	0.560488	0.26329	0
rxraa	M00242	chr5:41927542-41928042	atxn2	0.18752	Inter	0.214504	rxraa->chr5:41927542-41928042->atxn2	Act	0.560488	0.26329	0.859224
rarab	M09294_2.00	chr5:41927542-41928042	atxn2	0.222039	Inter	0.157516	rarab->chr5:41927542-41928042->atxn2	Act	0.271116	0.26329	0.859224
rxraa	M03939_2.00	chr5:41939331-41939831	atxn2	0.0841549	Inter	0.214504	rxraa->chr5:41939331-41939831->atxn2	Act	0.560488	0.26329	0
rarab	M05883_2.00	chr5:41939331-41939831	atxn2	0.364274	Inter	0.157516	rarab->chr5:41939331-41939831->atxn2	Act	0.271116	0.26329	0
smad3b	M07126	chr5:41708381-41708881	atxn2	0.0703293	TSS	0.0984106	smad3b->chr5:41708381-41708881->atxn2	Act	0.309202	0.26329	0
rxraa	M03377_2.00	chr5:41708381-41708881	atxn2	0.0603073	TSS	0.214504	rxraa->chr5:41708381-41708881->atxn2	Act	0.560488	0.26329	0
myb	M03352_2.00	chr7:49079266-49079766	b4galnt4b	0.0618576	TSS	0.183997	myb->chr7:49079266-49079766->b4galnt4b	Act	0.268851	0.493826	0
lhx2b	M03790_2.00	chr12:34580305-34580805	bahcc1b	0.180266	Body	0.148837	lhx2b->chr12:34580305-34580805->bahcc1b	Act	0.275906	0.326692	0
tcf7l1b	M08428_2.00	chr12:34580305-34580805	bahcc1b	0.145376	Body	0.324297	tcf7l1b->chr12:34580305-34580805->bahcc1b	Act	0.390873	0.326692	0
tcf7l2	M08428_2.00	chr12:34580305-34580805	bahcc1b	0.210262	Body	0.389383	tcf7l2->chr12:34580305-34580805->bahcc1b	Act	0.32183	0.326692	0
tcf7l2	M04775	chr12:34582849-34583349	bahcc1b	0.188685	Body	0.389383	tcf7l2->chr12:34582849-34583349->bahcc1b	Act	0.32183	0.326692	0
tcf7l1b	M02646_2.00	chr12:34582849-34583349	bahcc1b	0.0769694	Body	0.324297	tcf7l1b->chr12:34582849-34583349->bahcc1b	Act	0.390873	0.326692	0
lhx2b	M07047	chr12:34683304-34683804	bahcc1b	0.193645	Body	0.148837	lhx2b->chr12:34683304-34683804->bahcc1b	Act	0.275906	0.326692	0
vezf1a	M10107	chr12:34683304-34683804	bahcc1b	0.377438	Body	0.260784	vezf1a->chr12:34683304-34683804->bahcc1b	Act	0.393767	0.326692	0
gli2a	M01703	chr12:34703063-34703563	bahcc1b	0.15947	Body	0.347886	gli2a->chr12:34703063-34703563->bahcc1b	Act	0.398694	0.326692	0
vezf1a	M06815	chr12:34703063-34703563	bahcc1b	0.1712	Body	0.260784	vezf1a->chr12:34703063-34703563->bahcc1b	Act	0.393767	0.326692	0
rorb	M02709_2.00	chr12:34703063-34703563	bahcc1b	0.155681	Body	0.495702	rorb->chr12:34703063-34703563->bahcc1b	Act	0.518637	0.326692	0
rorb	M09276_2.00	chr12:34711696-34712196	bahcc1b	0.524613	Body	0.495702	rorb->chr12:34711696-34712196->bahcc1b	Act	0.518637	0.326692	0
lhx2b	M05157_2.00	chr12:34713614-34714114	bahcc1b	0.138244	Body	0.148837	lhx2b->chr12:34713614-34714114->bahcc1b	Act	0.275906	0.326692	0
tead1a	M06455_2.00	chr12:34713614-34714114	bahcc1b	0.0883063	Body	0.343618	tead1a->chr12:34713614-34714114->bahcc1b	Act	0.371967	0.326692	0
tead1a	M04141	chr12:34718585-34719085	bahcc1b	0.321624	Body	0.343618	tead1a->chr12:34718585-34719085->bahcc1b	Act	0.371967	0.326692	0
lhx2b	M07047	chr12:34718585-34719085	bahcc1b	0.193645	Body	0.148837	lhx2b->chr12:34718585-34719085->bahcc1b	Act	0.275906	0.326692	0
tcf7l1b	M09392_2.00	chr12:34718585-34719085	bahcc1b	0.429509	Body	0.324297	tcf7l1b->chr12:34718585-34719085->bahcc1b	Act	0.390873	0.326692	0
tcf7l2	M09392_2.00	chr12:34718585-34719085	bahcc1b	0.465533	Body	0.389383	tcf7l2->chr12:34718585-34719085->bahcc1b	Act	0.32183	0.326692	0
rorb	M02400_2.00	chr12:34729036-34729536	bahcc1b	0.231678	Body	0.495702	rorb->chr12:34729036-34729536->bahcc1b	Act	0.518637	0.326692	0
rxraa	M02400_2.00	chr12:34729036-34729536	bahcc1b	0.0577208	Body	0.209322	rxraa->chr12:34729036-34729536->bahcc1b	Act	0.560488	0.326692	0
tcf7l1b	M09400_2.00	chr12:34729036-34729536	bahcc1b	0.442143	Body	0.324297	tcf7l1b->chr12:34729036-34729536->bahcc1b	Act	0.390873	0.326692	0
tcf7l2	M09400_2.00	chr12:34729036-34729536	bahcc1b	0.523976	Body	0.389383	tcf7l2->chr12:34729036-34729536->bahcc1b	Act	0.32183	0.326692	0
rxraa	M00966	chr12:34737562-34738062	bahcc1b	0.134742	Body	0.209322	rxraa->chr12:34737562-34738062->bahcc1b	Act	0.560488	0.326692	0
gli2a	M07292	chr12:34737562-34738062	bahcc1b	0.122262	Body	0.347886	gli2a->chr12:34737562-34738062->bahcc1b	Act	0.398694	0.326692	0
lhx2b	M03128_2.00	chr12:34737562-34738062	bahcc1b	0.3058	Body	0.148837	lhx2b->chr12:34737562-34738062->bahcc1b	Act	0.275906	0.326692	0
tcf7l1b	M09392_2.00	chr12:34737562-34738062	bahcc1b	0.429509	Body	0.324297	tcf7l1b->chr12:34737562-34738062->bahcc1b	Act	0.390873	0.326692	0
tcf7l2	M09392_2.00	chr12:34737562-34738062	bahcc1b	0.465533	Body	0.389383	tcf7l2->chr12:34737562-34738062->bahcc1b	Act	0.32183	0.326692	0
tcf7l1b	M02646_2.00	chr12:34336608-34337108	bahcc1b	0.0769694	Inter	0.324297	tcf7l1b->chr12:34336608-34337108->bahcc1b	Act	0.390873	0.326692	1.93531
tcf7l2	M02646_2.00	chr12:34336608-34337108	bahcc1b	0.148628	Inter	0.389383	tcf7l2->chr12:34336608-34337108->bahcc1b	Act	0.32183	0.326692	1.93531
tead1a	M04141	chr12:34342496-34342996	bahcc1b	0.321624	Inter	0.343618	tead1a->chr12:34342496-34342996->bahcc1b	Act	0.371967	0.326692	1.17991
gli2a	M04403_2.00	chr12:34342496-34342996	bahcc1b	0.0521742	Inter	0.347886	gli2a->chr12:34342496-34342996->bahcc1b	Act	0.398694	0.326692	1.17991
lhx2b	M10714_2.00	chr12:34342496-34342996	bahcc1b	0.278521	Inter	0.148837	lhx2b->chr12:34342496-34342996->bahcc1b	Act	0.275906	0.326692	1.17991
arntl2	M08869	chr12:34352763-34353263	bahcc1b	0.0519378	Inter	0.185769	arntl2->chr12:34352763-34353263->bahcc1b	Act	0.257564	0.326692	0.914607
vezf1a	M10107	chr12:34352763-34353263	bahcc1b	0.377438	Inter	0.260784	vezf1a->chr12:34352763-34353263->bahcc1b	Act	0.393767	0.326692	0.914607
rorb	M03394_2.00	chr12:34352763-34353263	bahcc1b	0.115117	Inter	0.495702	rorb->chr12:34352763-34353263->bahcc1b	Act	0.518637	0.326692	0.914607
rxraa	M03394_2.00	chr12:34352763-34353263	bahcc1b	0.111611	Inter	0.209322	rxraa->chr12:34352763-34353263->bahcc1b	Act	0.560488	0.326692	0.914607
tcf7l1b	M00712_2.00	chr12:34368869-34369369	bahcc1b	0.313419	Inter	0.324297	tcf7l1b->chr12:34368869-34369369->bahcc1b	Act	0.390873	0.326692	0
tcf7l2	M00712_2.00	chr12:34368869-34369369	bahcc1b	0.358468	Inter	0.389383	tcf7l2->chr12:34368869-34369369->bahcc1b	Act	0.32183	0.326692	0
rxraa	M03392_2.00	chr12:34368869-34369369	bahcc1b	0.0594678	Inter	0.209322	rxraa->chr12:34368869-34369369->bahcc1b	Act	0.560488	0.326692	0
rorb	M05605_2.00	chr12:34368869-34369369	bahcc1b	0.145721	Inter	0.495702	rorb->chr12:34368869-34369369->bahcc1b	Act	0.518637	0.326692	0
rxraa	M01298_2.00	chr12:34371460-34371960	bahcc1b	0.10252	Inter	0.209322	rxraa->chr12:34371460-34371960->bahcc1b	Act	0.560488	0.326692	0
rorb	M03391_2.00	chr12:34371460-34371960	bahcc1b	0.0504279	Inter	0.495702	rorb->chr12:34371460-34371960->bahcc1b	Act	0.518637	0.326692	0
lhx2b	M03879_2.00	chr12:34371460-34371960	bahcc1b	0.3058	Inter	0.148837	lhx2b->chr12:34371460-34371960->bahcc1b	Act	0.275906	0.326692	0
vezf1a	M10107	chr12:34473137-34473637	bahcc1b	0.377438	Inter	0.260784	vezf1a->chr12:34473137-34473637->bahcc1b	Act	0.393767	0.326692	0
rxraa	M01268	chr12:34476389-34476889	bahcc1b	0.0611396	Inter	0.209322	rxraa->chr12:34476389-34476889->bahcc1b	Act	0.560488	0.326692	0
gli2a	M01703	chr12:34476389-34476889	bahcc1b	0.15947	Inter	0.347886	gli2a->chr12:34476389-34476889->bahcc1b	Act	0.398694	0.326692	0
lhx2b	M07385	chr12:34476389-34476889	bahcc1b	0.133008	Inter	0.148837	lhx2b->chr12:34476389-34476889->bahcc1b	Act	0.275906	0.326692	0
vezf1a	M10107	chr12:34476389-34476889	bahcc1b	0.377438	Inter	0.260784	vezf1a->chr12:34476389-34476889->bahcc1b	Act	0.393767	0.326692	0
rorb	M02388_2.00	chr12:34476389-34476889	bahcc1b	0.218702	Inter	0.495702	rorb->chr12:34476389-34476889->bahcc1b	Act	0.518637	0.326692	0
rxraa	M01268	chr12:34557683-34558183	bahcc1b	0.0611396	Inter	0.209322	rxraa->chr12:34557683-34558183->bahcc1b	Act	0.560488	0.326692	0
rorb	M06416_2.00	chr12:34557683-34558183	bahcc1b	0.571196	Inter	0.495702	rorb->chr12:34557683-34558183->bahcc1b	Act	0.518637	0.326692	0
lhx2b	M10714_2.00	chr12:34715401-34715901	bahcc1b	0.278521	TSS	0.148837	lhx2b->chr12:34715401-34715901->bahcc1b	Act	0.275906	0.326692	0
e2f3	M03961	chr25:30460637-30461137	banp	0.122248	TSS	0.0889188	e2f3->chr25:30460637-30461137->banp	Act	0.374128	0.277024	0
e2f3	M00050	chr18:41561110-41561610	baz1b	0.171272	Body	0.256685	e2f3->chr18:41561110-41561610->baz1b	Act	0.374128	0.402144	0
tcf7l1a	M09400_2.00	chr18:41561110-41561610	baz1b	0.355136	Body	0.29189	tcf7l1a->chr18:41561110-41561610->baz1b	Act	0.287814	0.402144	0
zic2b	M02836	chr18:41388624-41389124	baz1b	0.11199	Inter	0.275524	zic2b->chr18:41388624-41389124->baz1b	Act	0.256339	0.402144	0
gli2a	M07292	chr18:41559918-41560418	baz1b	0.122262	TSS	0.139263	gli2a->chr18:41559918-41560418->baz1b	Act	0.398694	0.402144	0
zic2b	M07292	chr18:41559918-41560418	baz1b	0.263671	TSS	0.275524	zic2b->chr18:41559918-41560418->baz1b	Act	0.256339	0.402144	0
e2f3	M00050	chr18:41560442-41560942	baz1b	0.171272	TSS	0.256685	e2f3->chr18:41560442-41560942->baz1b	Act	0.374128	0.402144	0
tfdp2	M08108_2.00	chr18:41560442-41560942	baz1b	0.0736701	TSS	0.240875	tfdp2->chr18:41560442-41560942->baz1b	Act	0.309458	0.402144	0
creb5b	M04210	chr6:11829561-11830061	baz2ba	0.289685	Body	0.0511192	creb5b->chr6:11829561-11830061->baz2ba	Act	0.371766	0.261214	0
vezf1a	M10107	chr6:11832054-11832554	baz2ba	0.377438	Body	0.290966	vezf1a->chr6:11832054-11832554->baz2ba	Act	0.393767	0.261214	0
vezf1a	M10107	chr6:11864479-11864979	baz2ba	0.377438	Body	0.290966	vezf1a->chr6:11864479-11864979->baz2ba	Act	0.393767	0.261214	0
vezf1a	M10107	chr6:11865255-11865755	baz2ba	0.377438	Body	0.290966	vezf1a->chr6:11865255-11865755->baz2ba	Act	0.393767	0.261214	0
vezf1a	M10107	chr6:11866226-11866726	baz2ba	0.377438	Body	0.290966	vezf1a->chr6:11866226-11866726->baz2ba	Act	0.393767	0.261214	0
vezf1a	M10107	chr6:11867223-11867723	baz2ba	0.377438	Body	0.290966	vezf1a->chr6:11867223-11867723->baz2ba	Act	0.393767	0.261214	0
tcf7l1a	M00805	chr8:15166946-15167446	bcar3	0.230037	Body	0.200978	tcf7l1a->chr8:15166946-15167446->bcar3	Act	0.287814	0.268279	0
rorb	M02410_2.00	chr8:15166946-15167446	bcar3	0.132588	Body	0.216015	rorb->chr8:15166946-15167446->bcar3	Act	0.518637	0.268279	0
tcf7l1a	M00805	chr8:15181589-15182089	bcar3	0.230037	Body	0.200978	tcf7l1a->chr8:15181589-15182089->bcar3	Act	0.287814	0.268279	0
gli2a	M07455	chr8:15181589-15182089	bcar3	0.132432	Body	0.153	gli2a->chr8:15181589-15182089->bcar3	Act	0.398694	0.268279	0
rorb	M02388_2.00	chr8:15181589-15182089	bcar3	0.218702	Body	0.216015	rorb->chr8:15181589-15182089->bcar3	Act	0.518637	0.268279	0
tead1a	M03995_2.00	chr8:15229844-15230344	bcar3	0.334726	Body	0.247982	tead1a->chr8:15229844-15230344->bcar3	Act	0.371967	0.268279	0
gli2a	M08875_2.00	chr8:15232576-15233076	bcar3	0.114009	Inter	0.153	gli2a->chr8:15232576-15233076->bcar3	Act	0.398694	0.268279	0
tcf7l1a	M00805	chr8:15182122-15182622	bcar3	0.230037	TSS	0.200978	tcf7l1a->chr8:15182122-15182622->bcar3	Act	0.287814	0.268279	0
gli2a	M07455	chr8:15182122-15182622	bcar3	0.132432	TSS	0.153	gli2a->chr8:15182122-15182622->bcar3	Act	0.398694	0.268279	0
rorb	M02388_2.00	chr8:15182122-15182622	bcar3	0.218702	TSS	0.216015	rorb->chr8:15182122-15182622->bcar3	Act	0.518637	0.268279	0
ar	M00953	chr5:61509495-61509995	bckdk	0.258192	Body	0.422545	ar->chr5:61509495-61509995->bckdk	Act	0.456809	0.466603	0
rorb	M01722	chr5:61509495-61509995	bckdk	0.411551	Body	0.118415	rorb->chr5:61509495-61509995->bckdk	Act	0.518637	0.466603	0
rarab	M02705_2.00	chr5:61509495-61509995	bckdk	0.239924	Body	0.376668	rarab->chr5:61509495-61509995->bckdk	Act	0.271116	0.466603	0
rxraa	M02705_2.00	chr5:61509495-61509995	bckdk	0.309111	Body	0.352873	rxraa->chr5:61509495-61509995->bckdk	Act	0.560488	0.466603	0
sox13	M03485_2.00	chr5:61509495-61509995	bckdk	0.159921	Body	0.379148	sox13->chr5:61509495-61509995->bckdk	Act	0.295973	0.466603	0
nr3c2	M05886_2.00	chr5:61509495-61509995	bckdk	0.230548	Body	0.360315	nr3c2->chr5:61509495-61509995->bckdk	Act	0.390207	0.466603	0
rxraa	M01268	chr5:61534823-61535323	bckdk	0.0611396	Body	0.352873	rxraa->chr5:61534823-61535323->bckdk	Act	0.560488	0.466603	0
rorb	M08966	chr5:61534823-61535323	bckdk	0.562027	Body	0.118415	rorb->chr5:61534823-61535323->bckdk	Act	0.518637	0.466603	0
rarab	M02706_2.00	chr5:61534823-61535323	bckdk	0.315051	Body	0.376668	rarab->chr5:61534823-61535323->bckdk	Act	0.271116	0.466603	0
lhx2b	M03879_2.00	chr5:61534823-61535323	bckdk	0.3058	Body	0.385459	lhx2b->chr5:61534823-61535323->bckdk	Act	0.275906	0.466603	0
sox13	M03969_2.00	chr5:61534823-61535323	bckdk	0.340108	Body	0.379148	sox13->chr5:61534823-61535323->bckdk	Act	0.295973	0.466603	0
rxraa	M00242	chr5:61535847-61536347	bckdk	0.18752	Body	0.352873	rxraa->chr5:61535847-61536347->bckdk	Act	0.560488	0.466603	0
lhx2b	M07047	chr5:61535847-61536347	bckdk	0.193645	Body	0.385459	lhx2b->chr5:61535847-61536347->bckdk	Act	0.275906	0.466603	0
sox13	M02719_2.00	chr5:61535847-61536347	bckdk	0.478973	Body	0.379148	sox13->chr5:61535847-61536347->bckdk	Act	0.295973	0.466603	0
tcf7l2	M09394_2.00	chr5:61535847-61536347	bckdk	0.260135	Body	0.33121	tcf7l2->chr5:61535847-61536347->bckdk	Act	0.32183	0.466603	0
rarab	M11183_2.00	chr5:61535847-61536347	bckdk	0.13507	Body	0.376668	rarab->chr5:61535847-61536347->bckdk	Act	0.271116	0.466603	0
rorb	M11183_2.00	chr5:61535847-61536347	bckdk	0.12103	Body	0.118415	rorb->chr5:61535847-61536347->bckdk	Act	0.518637	0.466603	0
rorb	M01722	chr5:61537596-61538096	bckdk	0.411551	Body	0.118415	rorb->chr5:61537596-61538096->bckdk	Act	0.518637	0.466603	0
rxraa	M07256	chr5:61537596-61538096	bckdk	0.130867	Body	0.352873	rxraa->chr5:61537596-61538096->bckdk	Act	0.560488	0.466603	0
rarab	M00820_2.00	chr5:61537596-61538096	bckdk	0.179555	Body	0.376668	rarab->chr5:61537596-61538096->bckdk	Act	0.271116	0.466603	0
klf12b	M08857_2.00	chr5:61537596-61538096	bckdk	0.0584093	Body	0.323162	klf12b->chr5:61537596-61538096->bckdk	Act	0.342959	0.466603	0
rxraa	M00515	chr5:61538124-61538624	bckdk	0.078754	Body	0.352873	rxraa->chr5:61538124-61538624->bckdk	Act	0.560488	0.466603	0.692594
rorb	M01722	chr5:61538124-61538624	bckdk	0.411551	Body	0.118415	rorb->chr5:61538124-61538624->bckdk	Act	0.518637	0.466603	0.692594
rarab	M02891	chr5:61538124-61538624	bckdk	0.0867125	Body	0.376668	rarab->chr5:61538124-61538624->bckdk	Act	0.271116	0.466603	0.692594
lhx2b	M07047	chr5:61538124-61538624	bckdk	0.193645	Body	0.385459	lhx2b->chr5:61538124-61538624->bckdk	Act	0.275906	0.466603	0.692594
sox13	M03494_2.00	chr5:61538124-61538624	bckdk	0.0699735	Body	0.379148	sox13->chr5:61538124-61538624->bckdk	Act	0.295973	0.466603	0.692594
klf12b	M08857_2.00	chr5:61538124-61538624	bckdk	0.0584093	Body	0.323162	klf12b->chr5:61538124-61538624->bckdk	Act	0.342959	0.466603	0.692594
stat3	M00223	chr5:61404256-61404756	bckdk	0.267699	Inter	0.281877	stat3->chr5:61404256-61404756->bckdk	Act	0.327768	0.466603	0
rxraa	M04787	chr5:61404256-61404756	bckdk	0.0608	Inter	0.352873	rxraa->chr5:61404256-61404756->bckdk	Act	0.560488	0.466603	0
ar	M08908	chr5:61404256-61404756	bckdk	0.18432	Inter	0.422545	ar->chr5:61404256-61404756->bckdk	Act	0.456809	0.466603	0
sox13	M05759_2.00	chr5:61404256-61404756	bckdk	0.445289	Inter	0.379148	sox13->chr5:61404256-61404756->bckdk	Act	0.295973	0.466603	0
tcf7l2	M09386_2.00	chr5:61404256-61404756	bckdk	0.358656	Inter	0.33121	tcf7l2->chr5:61404256-61404756->bckdk	Act	0.32183	0.466603	0
nr3c2	M09609_2.00	chr5:61404256-61404756	bckdk	0.0919	Inter	0.360315	nr3c2->chr5:61404256-61404756->bckdk	Act	0.390207	0.466603	0
rxraa	M01268	chr5:61693420-61693920	bckdk	0.0611396	Inter	0.352873	rxraa->chr5:61693420-61693920->bckdk	Act	0.560488	0.466603	0
stat3	M07065	chr5:61693420-61693920	bckdk	0.338395	Inter	0.281877	stat3->chr5:61693420-61693920->bckdk	Act	0.327768	0.466603	0
rorb	M00813_2.00	chr5:61693420-61693920	bckdk	0.0999314	Inter	0.118415	rorb->chr5:61693420-61693920->bckdk	Act	0.518637	0.466603	0
lhx2b	M03164_2.00	chr5:61693420-61693920	bckdk	0.148772	Inter	0.385459	lhx2b->chr5:61693420-61693920->bckdk	Act	0.275906	0.466603	0
sox13	M03492_2.00	chr5:61693420-61693920	bckdk	0.203852	Inter	0.379148	sox13->chr5:61693420-61693920->bckdk	Act	0.295973	0.466603	0
rarab	M05566_2.00	chr5:61693420-61693920	bckdk	0.087917	Inter	0.376668	rarab->chr5:61693420-61693920->bckdk	Act	0.271116	0.466603	0
rarab	M06412_2.00	chr5:61696167-61696667	bckdk	0.18628	Inter	0.376668	rarab->chr5:61696167-61696667->bckdk	Act	0.271116	0.466603	0
rorb	M06412_2.00	chr5:61696167-61696667	bckdk	0.25014	Inter	0.118415	rorb->chr5:61696167-61696667->bckdk	Act	0.518637	0.466603	0
rxraa	M06412_2.00	chr5:61696167-61696667	bckdk	0.240607	Inter	0.352873	rxraa->chr5:61696167-61696667->bckdk	Act	0.560488	0.466603	0
lhx2b	M07047	chr5:61508081-61508581	bckdk	0.193645	TSS	0.385459	lhx2b->chr5:61508081-61508581->bckdk	Act	0.275906	0.466603	0
sox13	M06449_2.00	chr5:61508081-61508581	bckdk	0.556483	TSS	0.379148	sox13->chr5:61508081-61508581->bckdk	Act	0.295973	0.466603	0
rorb	M08154_2.00	chr5:61508081-61508581	bckdk	0.0907831	TSS	0.118415	rorb->chr5:61508081-61508581->bckdk	Act	0.518637	0.466603	0
rxraa	M09289_2.00	chr5:61508081-61508581	bckdk	0.0779409	TSS	0.352873	rxraa->chr5:61508081-61508581->bckdk	Act	0.560488	0.466603	0
rarab	M09313_2.00	chr5:61508081-61508581	bckdk	0.268222	TSS	0.376668	rarab->chr5:61508081-61508581->bckdk	Act	0.271116	0.466603	0
tcf7l2	M09400_2.00	chr5:61508081-61508581	bckdk	0.523976	TSS	0.33121	tcf7l2->chr5:61508081-61508581->bckdk	Act	0.32183	0.466603	0
gli2a	M07292	chr5:61508748-61509248	bckdk	0.122262	TSS	0.430686	gli2a->chr5:61508748-61509248->bckdk	Act	0.398694	0.466603	0
rxraa	M03419_2.00	chr5:61508748-61509248	bckdk	0.054582	TSS	0.352873	rxraa->chr5:61508748-61509248->bckdk	Act	0.560488	0.466603	0
rorb	M05666_2.00	chr5:61508748-61509248	bckdk	0.0540963	TSS	0.118415	rorb->chr5:61508748-61509248->bckdk	Act	0.518637	0.466603	0
rorb	M01722	chr1:47353966-47354466	bcl9	0.411551	Body	0.26898	rorb->chr1:47353966-47354466->bcl9	Act	0.518637	0.253421	0
rfx2	M00975	chr1:47379831-47380331	bcl9	0.211825	Body	0.209464	rfx2->chr1:47379831-47380331->bcl9	Act	0.396514	0.253421	0
rorb	M05884_2.00	chr1:47379831-47380331	bcl9	0.524028	Body	0.26898	rorb->chr1:47379831-47380331->bcl9	Act	0.518637	0.253421	0
tcf7l1a	M09400_2.00	chr1:47379831-47380331	bcl9	0.355136	Body	0.232697	tcf7l1a->chr1:47379831-47380331->bcl9	Act	0.287814	0.253421	0
vezf1a	M10107	chr1:47391161-47391661	bcl9	0.377438	Body	0.273104	vezf1a->chr1:47391161-47391661->bcl9	Act	0.393767	0.253421	0
tead1a	M09437_2.00	chr1:47391161-47391661	bcl9	0.339684	Body	0.279463	tead1a->chr1:47391161-47391661->bcl9	Act	0.371967	0.253421	0
rfx2	M00975	chr1:47106340-47106840	bcl9	0.211825	Inter	0.209464	rfx2->chr1:47106340-47106840->bcl9	Act	0.396514	0.253421	0
rorb	M03934_2.00	chr1:47106340-47106840	bcl9	0.0955536	Inter	0.26898	rorb->chr1:47106340-47106840->bcl9	Act	0.518637	0.253421	0
tead1a	M04142	chr1:47137917-47138417	bcl9	0.148445	Inter	0.279463	tead1a->chr1:47137917-47138417->bcl9	Act	0.371967	0.253421	0
rorb	M06412_2.00	chr1:47137917-47138417	bcl9	0.25014	Inter	0.26898	rorb->chr1:47137917-47138417->bcl9	Act	0.518637	0.253421	0
tcf7l1a	M00805	chr1:47154268-47154768	bcl9	0.230037	Inter	0.232697	tcf7l1a->chr1:47154268-47154768->bcl9	Act	0.287814	0.253421	0
fosl2	M04036_2.00	chr1:47154268-47154768	bcl9	0.237779	Inter	0.211977	fosl2->chr1:47154268-47154768->bcl9	Act	0.273506	0.253421	0
vezf1a	M10107	chr1:47225463-47225963	bcl9	0.377438	Inter	0.273104	vezf1a->chr1:47225463-47225963->bcl9	Act	0.393767	0.253421	0
rorb	M08156_2.00	chr1:47225463-47225963	bcl9	0.104142	Inter	0.26898	rorb->chr1:47225463-47225963->bcl9	Act	0.518637	0.253421	0
rfx2	M04096	chr1:47228948-47229448	bcl9	0.184873	Inter	0.209464	rfx2->chr1:47228948-47229448->bcl9	Act	0.396514	0.253421	0
tead1a	M04141	chr1:47228948-47229448	bcl9	0.321624	Inter	0.279463	tead1a->chr1:47228948-47229448->bcl9	Act	0.371967	0.253421	0
tcf7l1a	M01594	chr1:47314124-47314624	bcl9	0.313715	Inter	0.232697	tcf7l1a->chr1:47314124-47314624->bcl9	Act	0.287814	0.253421	0
fosl2	M03870	chr1:47314124-47314624	bcl9	0.573182	Inter	0.211977	fosl2->chr1:47314124-47314624->bcl9	Act	0.273506	0.253421	0
rorb	M03394_2.00	chr1:47314124-47314624	bcl9	0.115117	Inter	0.26898	rorb->chr1:47314124-47314624->bcl9	Act	0.518637	0.253421	0
tcf7l1a	M00805	chr1:47527032-47527532	bcl9	0.230037	Inter	0.232697	tcf7l1a->chr1:47527032-47527532->bcl9	Act	0.287814	0.253421	0
vezf1a	M10107	chr1:47527032-47527532	bcl9	0.377438	Inter	0.273104	vezf1a->chr1:47527032-47527532->bcl9	Act	0.393767	0.253421	0
rorb	M01722	chr1:47330774-47331274	bcl9	0.411551	TSS	0.26898	rorb->chr1:47330774-47331274->bcl9	Act	0.518637	0.253421	0
tcf7l1a	M00805	chr1:47331334-47331834	bcl9	0.230037	TSS	0.232697	tcf7l1a->chr1:47331334-47331834->bcl9	Act	0.287814	0.253421	0
rfx2	M00975	chr1:47331334-47331834	bcl9	0.211825	TSS	0.209464	rfx2->chr1:47331334-47331834->bcl9	Act	0.396514	0.253421	0
vezf1a	M10107	chr1:47331334-47331834	bcl9	0.377438	TSS	0.273104	vezf1a->chr1:47331334-47331834->bcl9	Act	0.393767	0.253421	0
foxo1a	M03823	chr21:17112333-17112833	bcr	0.456812	Body	0.34828	foxo1a->chr21:17112333-17112833->bcr	Act	0.378908	0.590013	0
fosl2	M08932	chr21:17112333-17112833	bcr	0.0856818	Body	0.381859	fosl2->chr21:17112333-17112833->bcr	Act	0.273506	0.590013	0
sox13	M08168_2.00	chr21:17112333-17112833	bcr	0.58539	Body	0.33767	sox13->chr21:17112333-17112833->bcr	Act	0.295973	0.590013	0
foxo1b	M09086_2.00	chr21:17112333-17112833	bcr	0.0740946	Body	0.182058	foxo1b->chr21:17112333-17112833->bcr	Act	0.272074	0.590013	0
fosl2	M07092	chr21:17121661-17122161	bcr	0.578819	Body	0.381859	fosl2->chr21:17121661-17122161->bcr	Act	0.273506	0.590013	0
sox13	M03485_2.00	chr21:17121661-17122161	bcr	0.159921	Body	0.33767	sox13->chr21:17121661-17122161->bcr	Act	0.295973	0.590013	0
rorb	M09313_2.00	chr21:17121661-17122161	bcr	0.573618	Body	0.391407	rorb->chr21:17121661-17122161->bcr	Act	0.518637	0.590013	0
foxo1b	M01968	chr21:17239024-17239524	bcr	0.0919402	Body	0.182058	foxo1b->chr21:17239024-17239524->bcr	Act	0.272074	0.590013	0.764909
foxo1a	M03823	chr21:17239024-17239524	bcr	0.456812	Body	0.34828	foxo1a->chr21:17239024-17239524->bcr	Act	0.378908	0.590013	0.764909
fosl2	M03870	chr21:17239024-17239524	bcr	0.573182	Body	0.381859	fosl2->chr21:17239024-17239524->bcr	Act	0.273506	0.590013	0.764909
rfx2	M10048	chr21:17239024-17239524	bcr	0.357852	Body	0.298495	rfx2->chr21:17239024-17239524->bcr	Act	0.396514	0.590013	0.764909
sox13	M02719_2.00	chr21:17239024-17239524	bcr	0.478973	Body	0.33767	sox13->chr21:17239024-17239524->bcr	Act	0.295973	0.590013	0.764909
rorb	M09276_2.00	chr21:17239024-17239524	bcr	0.524613	Body	0.391407	rorb->chr21:17239024-17239524->bcr	Act	0.518637	0.590013	0.764909
gli2a	M07455	chr21:17245309-17245809	bcr	0.132432	Body	0.37524	gli2a->chr21:17245309-17245809->bcr	Act	0.398694	0.590013	0
sox13	M09387_2.00	chr21:17245309-17245809	bcr	0.605686	Body	0.33767	sox13->chr21:17245309-17245809->bcr	Act	0.295973	0.590013	0
fosl2	M09923	chr21:16868912-16869412	bcr	0.583077	Inter	0.381859	fosl2->chr21:16868912-16869412->bcr	Act	0.273506	0.590013	0
sox13	M03489_2.00	chr21:16868912-16869412	bcr	0.167944	Inter	0.33767	sox13->chr21:16868912-16869412->bcr	Act	0.295973	0.590013	0
tead1a	M03995_2.00	chr21:16868912-16869412	bcr	0.334726	Inter	0.340021	tead1a->chr21:16868912-16869412->bcr	Act	0.371967	0.590013	0
rorb	M00181_2.00	chr21:16910371-16910871	bcr	0.1411	Inter	0.391407	rorb->chr21:16910371-16910871->bcr	Act	0.518637	0.590013	0
rfx2	M04096	chr21:16922116-16922616	bcr	0.184873	Inter	0.298495	rfx2->chr21:16922116-16922616->bcr	Act	0.396514	0.590013	0
gli2a	M07455	chr21:16922116-16922616	bcr	0.132432	Inter	0.37524	gli2a->chr21:16922116-16922616->bcr	Act	0.398694	0.590013	0
rorb	M00811_2.00	chr21:16922116-16922616	bcr	0.0565426	Inter	0.391407	rorb->chr21:16922116-16922616->bcr	Act	0.518637	0.590013	0
fosl2	M00924	chr21:16926536-16927036	bcr	0.565179	Inter	0.381859	fosl2->chr21:16926536-16927036->bcr	Act	0.273506	0.590013	0
foxo1a	M08241	chr21:16926536-16927036	bcr	0.185905	Inter	0.34828	foxo1a->chr21:16926536-16927036->bcr	Act	0.378908	0.590013	0
vezf1a	M10107	chr21:16926536-16927036	bcr	0.377438	Inter	0.262144	vezf1a->chr21:16926536-16927036->bcr	Act	0.393767	0.590013	0
sox13	M03537_2.00	chr21:16926536-16927036	bcr	0.110618	Inter	0.33767	sox13->chr21:16926536-16927036->bcr	Act	0.295973	0.590013	0
sox13	M05753_2.00	chr21:17099409-17099909	bcr	0.519769	Inter	0.33767	sox13->chr21:17099409-17099909->bcr	Act	0.295973	0.590013	0
rorb	M09263_2.00	chr21:17099409-17099909	bcr	0.11617	Inter	0.391407	rorb->chr21:17099409-17099909->bcr	Act	0.518637	0.590013	0
sox13	M01014	chr21:17108525-17109025	bcr	0.382335	Inter	0.33767	sox13->chr21:17108525-17109025->bcr	Act	0.295973	0.590013	0
foxo1b	M01968	chr21:17108525-17109025	bcr	0.0919402	Inter	0.182058	foxo1b->chr21:17108525-17109025->bcr	Act	0.272074	0.590013	0
tcf7l2	M04775	chr21:17108525-17109025	bcr	0.188685	Inter	0.291688	tcf7l2->chr21:17108525-17109025->bcr	Act	0.32183	0.590013	0
sox13	M03517_2.00	chr21:17298535-17299035	bcr	0.226044	Inter	0.33767	sox13->chr21:17298535-17299035->bcr	Act	0.295973	0.590013	0
tcf7l2	M09400_2.00	chr21:17298535-17299035	bcr	0.523976	Inter	0.291688	tcf7l2->chr21:17298535-17299035->bcr	Act	0.32183	0.590013	0
sox13	M09388_2.00	chr21:17110635-17111135	bcr	0.582094	TSS	0.33767	sox13->chr21:17110635-17111135->bcr	Act	0.295973	0.590013	0.750929
foxo1a	M03823	chr23:6495233-6495733	bmp7b	0.456812	Body	0.456555	foxo1a->chr23:6495233-6495733->bmp7b	Act	0.378908	0.446362	1.21461
gli2a	M07455	chr23:6495233-6495733	bmp7b	0.132432	Body	0.624497	gli2a->chr23:6495233-6495733->bmp7b	Act	0.398694	0.446362	1.21461
rorb	M00813_2.00	chr23:6495233-6495733	bmp7b	0.0999314	Body	0.108585	rorb->chr23:6495233-6495733->bmp7b	Act	0.518637	0.446362	1.21461
vax2	M03777_2.00	chr23:6495233-6495733	bmp7b	0.135182	Body	0.426075	vax2->chr23:6495233-6495733->bmp7b	Act	0.459159	0.446362	1.21461
sox13	M05897_2.00	chr23:6495233-6495733	bmp7b	0.368638	Body	0.474525	sox13->chr23:6495233-6495733->bmp7b	Act	0.295973	0.446362	1.21461
rarab	M09617_2.00	chr23:6495233-6495733	bmp7b	0.381717	Body	0.499312	rarab->chr23:6495233-6495733->bmp7b	Act	0.271116	0.446362	1.21461
rorb	M02397_2.00	chr23:6498861-6499361	bmp7b	0.0917707	Body	0.108585	rorb->chr23:6498861-6499361->bmp7b	Act	0.518637	0.446362	0
rarab	M06427_2.00	chr23:6498861-6499361	bmp7b	0.0577549	Body	0.499312	rarab->chr23:6498861-6499361->bmp7b	Act	0.271116	0.446362	0
rarab	M03394_2.00	chr23:6521847-6522347	bmp7b	0.0649601	Body	0.499312	rarab->chr23:6521847-6522347->bmp7b	Act	0.271116	0.446362	0
rorb	M03394_2.00	chr23:6521847-6522347	bmp7b	0.115117	Body	0.108585	rorb->chr23:6521847-6522347->bmp7b	Act	0.518637	0.446362	0
sox13	M09405_2.00	chr23:6521847-6522347	bmp7b	0.598781	Body	0.474525	sox13->chr23:6521847-6522347->bmp7b	Act	0.295973	0.446362	0
foxo1a	M03823	chr23:6373517-6374017	bmp7b	0.456812	Inter	0.456555	foxo1a->chr23:6373517-6374017->bmp7b	Act	0.378908	0.446362	0
sox13	M02719_2.00	chr23:6373517-6374017	bmp7b	0.478973	Inter	0.474525	sox13->chr23:6373517-6374017->bmp7b	Act	0.295973	0.446362	0
ar	M08189	chr23:6376185-6376685	bmp7b	0.387419	Inter	0.583404	ar->chr23:6376185-6376685->bmp7b	Act	0.456809	0.446362	0
rorb	M08966	chr23:6376185-6376685	bmp7b	0.562027	Inter	0.108585	rorb->chr23:6376185-6376685->bmp7b	Act	0.518637	0.446362	0
sox13	M01026_2.00	chr23:6376185-6376685	bmp7b	0.478959	Inter	0.474525	sox13->chr23:6376185-6376685->bmp7b	Act	0.295973	0.446362	0
rarab	M05883_2.00	chr23:6376185-6376685	bmp7b	0.364274	Inter	0.499312	rarab->chr23:6376185-6376685->bmp7b	Act	0.271116	0.446362	0
tcf7l2	M09392_2.00	chr23:6376185-6376685	bmp7b	0.465533	Inter	0.464673	tcf7l2->chr23:6376185-6376685->bmp7b	Act	0.32183	0.446362	0
foxo1a	M10563_2.00	chr23:6376185-6376685	bmp7b	0.105137	Inter	0.456555	foxo1a->chr23:6376185-6376685->bmp7b	Act	0.378908	0.446362	0
foxo1a	M01216	chr23:6388325-6388825	bmp7b	0.3512	Inter	0.456555	foxo1a->chr23:6388325-6388825->bmp7b	Act	0.378908	0.446362	0
sox13	M00213_2.00	chr23:6388325-6388825	bmp7b	0.444439	Inter	0.474525	sox13->chr23:6388325-6388825->bmp7b	Act	0.295973	0.446362	0
foxo1a	M08295	chr23:6396644-6397144	bmp7b	0.175832	Inter	0.456555	foxo1a->chr23:6396644-6397144->bmp7b	Act	0.378908	0.446362	0
rorb	M00184_2.00	chr23:6396644-6397144	bmp7b	0.0869793	Inter	0.108585	rorb->chr23:6396644-6397144->bmp7b	Act	0.518637	0.446362	0
rarab	M02705_2.00	chr23:6396644-6397144	bmp7b	0.239924	Inter	0.499312	rarab->chr23:6396644-6397144->bmp7b	Act	0.271116	0.446362	0
lhx2b	M07047	chr23:6411836-6412336	bmp7b	0.193645	Inter	0.517384	lhx2b->chr23:6411836-6412336->bmp7b	Act	0.275906	0.446362	0
sox13	M03491_2.00	chr23:6411836-6412336	bmp7b	0.168778	Inter	0.474525	sox13->chr23:6411836-6412336->bmp7b	Act	0.295973	0.446362	0
vax2	M06325_2.00	chr23:6411836-6412336	bmp7b	0.0732205	Inter	0.426075	vax2->chr23:6411836-6412336->bmp7b	Act	0.459159	0.446362	0
lhx2b	M05038_2.00	chr23:6768703-6769203	bmp7b	0.289592	Inter	0.517384	lhx2b->chr23:6768703-6769203->bmp7b	Act	0.275906	0.446362	0
vax2	M05038_2.00	chr23:6768703-6769203	bmp7b	0.165068	Inter	0.426075	vax2->chr23:6768703-6769203->bmp7b	Act	0.459159	0.446362	0
foxo1a	M03041_2.00	chr23:6521252-6521752	bmp7b	0.0544277	TSS	0.456555	foxo1a->chr23:6521252-6521752->bmp7b	Act	0.378908	0.446362	0
sox13	M03514_2.00	chr12:25995328-25995828	bmpr1ab	0.0850607	Body	0.517132	sox13->chr12:25995328-25995828->bmpr1ab	Act	0.295973	0.3824	0
tcf7l1a	M00805	chr12:26022506-26023006	bmpr1ab	0.230037	Body	0.281917	tcf7l1a->chr12:26022506-26023006->bmpr1ab	Act	0.287814	0.3824	0
rfx2	M00975	chr12:26022506-26023006	bmpr1ab	0.211825	Body	0.321297	rfx2->chr12:26022506-26023006->bmpr1ab	Act	0.396514	0.3824	0
vdrb	M02403_2.00	chr12:26022506-26023006	bmpr1ab	0.121503	Body	0.258386	vdrb->chr12:26022506-26023006->bmpr1ab	Act	0.421237	0.3824	0
lhx2b	M03805_2.00	chr12:26022506-26023006	bmpr1ab	0.127223	Body	0.410362	lhx2b->chr12:26022506-26023006->bmpr1ab	Act	0.275906	0.3824	0
tcf7l2	M05757_2.00	chr12:26022506-26023006	bmpr1ab	0.227013	Body	0.394494	tcf7l2->chr12:26022506-26023006->bmpr1ab	Act	0.32183	0.3824	0
sox13	M06559_2.00	chr12:26022506-26023006	bmpr1ab	0.486861	Body	0.517132	sox13->chr12:26022506-26023006->bmpr1ab	Act	0.295973	0.3824	0
ar	M09266_2.00	chr12:26022506-26023006	bmpr1ab	0.307993	Body	0.390145	ar->chr12:26022506-26023006->bmpr1ab	Act	0.456809	0.3824	0
foxo1a	M03823	chr12:25840972-25841472	bmpr1ab	0.456812	Inter	0.442276	foxo1a->chr12:25840972-25841472->bmpr1ab	Act	0.378908	0.3824	0
lhx2b	M07047	chr12:25840972-25841472	bmpr1ab	0.193645	Inter	0.410362	lhx2b->chr12:25840972-25841472->bmpr1ab	Act	0.275906	0.3824	0
tcf7l1a	M00805	chr12:25841621-25842121	bmpr1ab	0.230037	Inter	0.281917	tcf7l1a->chr12:25841621-25842121->bmpr1ab	Act	0.287814	0.3824	0
lhx2b	M07047	chr12:25841621-25842121	bmpr1ab	0.193645	Inter	0.410362	lhx2b->chr12:25841621-25842121->bmpr1ab	Act	0.275906	0.3824	0
foxo1a	M08304	chr12:25841621-25842121	bmpr1ab	0.0715894	Inter	0.442276	foxo1a->chr12:25841621-25842121->bmpr1ab	Act	0.378908	0.3824	0
nr2e1	M03362_2.00	chr12:25841621-25842121	bmpr1ab	0.18176	Inter	0.35689	nr2e1->chr12:25841621-25842121->bmpr1ab	Act	0.345467	0.3824	0
ar	M00962	chr12:25849960-25850460	bmpr1ab	0.28152	Inter	0.390145	ar->chr12:25849960-25850460->bmpr1ab	Act	0.456809	0.3824	0
nr2e1	M03359_2.00	chr12:25849960-25850460	bmpr1ab	0.158873	Inter	0.35689	nr2e1->chr12:25849960-25850460->bmpr1ab	Act	0.345467	0.3824	0
vdrb	M09606_2.00	chr12:25849960-25850460	bmpr1ab	0.100148	Inter	0.258386	vdrb->chr12:25849960-25850460->bmpr1ab	Act	0.421237	0.3824	0
tcf7l1a	M01594	chr12:26190435-26190935	bmpr1ab	0.313715	Inter	0.281917	tcf7l1a->chr12:26190435-26190935->bmpr1ab	Act	0.287814	0.3824	0
foxo1a	M04257	chr12:26190435-26190935	bmpr1ab	0.133348	Inter	0.442276	foxo1a->chr12:26190435-26190935->bmpr1ab	Act	0.378908	0.3824	0
ar	M08189	chr12:26190435-26190935	bmpr1ab	0.387419	Inter	0.390145	ar->chr12:26190435-26190935->bmpr1ab	Act	0.456809	0.3824	0
rfx2	M00186_2.00	chr12:26190435-26190935	bmpr1ab	0.327596	Inter	0.321297	rfx2->chr12:26190435-26190935->bmpr1ab	Act	0.396514	0.3824	0
sox13	M00201_2.00	chr12:26190435-26190935	bmpr1ab	0.235587	Inter	0.517132	sox13->chr12:26190435-26190935->bmpr1ab	Act	0.295973	0.3824	0
tcf7l2	M09392_2.00	chr12:26190435-26190935	bmpr1ab	0.465533	Inter	0.394494	tcf7l2->chr12:26190435-26190935->bmpr1ab	Act	0.32183	0.3824	0
ar	M09589	chr12:26219783-26220283	bmpr1ab	0.273931	Inter	0.390145	ar->chr12:26219783-26220283->bmpr1ab	Act	0.456809	0.3824	0
sox13	M05769_2.00	chr12:26219783-26220283	bmpr1ab	0.292601	Inter	0.517132	sox13->chr12:26219783-26220283->bmpr1ab	Act	0.295973	0.3824	0
nr2e1	M08220_2.00	chr12:26219783-26220283	bmpr1ab	0.0537304	Inter	0.35689	nr2e1->chr12:26219783-26220283->bmpr1ab	Act	0.345467	0.3824	0
gli2a	M07455	chr12:26021869-26022369	bmpr1ab	0.132432	TSS	0.589094	gli2a->chr12:26021869-26022369->bmpr1ab	Act	0.398694	0.3824	0
ar	M08189	chr12:26021869-26022369	bmpr1ab	0.387419	TSS	0.390145	ar->chr12:26021869-26022369->bmpr1ab	Act	0.456809	0.3824	0
sox13	M06559_2.00	chr12:26021869-26022369	bmpr1ab	0.486861	TSS	0.517132	sox13->chr12:26021869-26022369->bmpr1ab	Act	0.295973	0.3824	0
rfx2	M00975	chr12:26023035-26023535	bmpr1ab	0.211825	TSS	0.321297	rfx2->chr12:26023035-26023535->bmpr1ab	Act	0.396514	0.3824	0
vdrb	M02403_2.00	chr12:26023035-26023535	bmpr1ab	0.121503	TSS	0.258386	vdrb->chr12:26023035-26023535->bmpr1ab	Act	0.421237	0.3824	0
lhx2b	M03805_2.00	chr12:26023035-26023535	bmpr1ab	0.127223	TSS	0.410362	lhx2b->chr12:26023035-26023535->bmpr1ab	Act	0.275906	0.3824	0
ar	M11120_2.00	chr12:26023035-26023535	bmpr1ab	0.160941	TSS	0.390145	ar->chr12:26023035-26023535->bmpr1ab	Act	0.456809	0.3824	0
pax2b	M00486	chr5:7711995-7712495	bmpr1ba	0.070166	Body	0.196157	pax2b->chr5:7711995-7712495->bmpr1ba	Act	0.346983	0.418258	0
gli2a	M03902	chr5:7711995-7712495	bmpr1ba	0.339781	Body	0.495751	gli2a->chr5:7711995-7712495->bmpr1ba	Act	0.398694	0.418258	0
foxp1a	M07095	chr5:7711995-7712495	bmpr1ba	0.178545	Body	0.200516	foxp1a->chr5:7711995-7712495->bmpr1ba	Act	0.293204	0.418258	0
sox13	M03488_2.00	chr5:7711995-7712495	bmpr1ba	0.179814	Body	0.358127	sox13->chr5:7711995-7712495->bmpr1ba	Act	0.295973	0.418258	0
tcf7l1a	M08902	chr19:7155836-7156336	brd2a	0.171958	Body	0.235177	tcf7l1a->chr19:7155836-7156336->brd2a	Act	0.287814	0.321296	0
tcf7l1a	M00805	chr19:7156419-7156919	brd2a	0.230037	Body	0.235177	tcf7l1a->chr19:7156419-7156919->brd2a	Act	0.287814	0.321296	0
ascl1a	M09767	chr19:7156419-7156919	brd2a	0.0571486	Body	0.264381	ascl1a->chr19:7156419-7156919->brd2a	Act	0.349897	0.321296	0
e2f3	M09037_2.00	chr19:7156419-7156919	brd2a	0.0999499	Body	0.176089	e2f3->chr19:7156419-7156919->brd2a	Act	0.374128	0.321296	0
tead1a	M09438_2.00	chr19:7156419-7156919	brd2a	0.321019	Body	0.247608	tead1a->chr19:7156419-7156919->brd2a	Act	0.371967	0.321296	0
tcf7l1a	M00805	chr19:7156924-7157424	brd2a	0.230037	Body	0.235177	tcf7l1a->chr19:7156924-7157424->brd2a	Act	0.287814	0.321296	0
ascl1a	M09767	chr19:7156924-7157424	brd2a	0.0571486	Body	0.264381	ascl1a->chr19:7156924-7157424->brd2a	Act	0.349897	0.321296	0
tead1a	M03579_2.00	chr19:7156924-7157424	brd2a	0.334119	Body	0.247608	tead1a->chr19:7156924-7157424->brd2a	Act	0.371967	0.321296	0
rfx2	M03962_2.00	chr19:7156924-7157424	brd2a	0.121051	Body	0.208812	rfx2->chr19:7156924-7157424->brd2a	Act	0.396514	0.321296	0
zic2b	M04566_2.00	chr19:7156924-7157424	brd2a	0.239437	Body	0.210186	zic2b->chr19:7156924-7157424->brd2a	Act	0.256339	0.321296	0
e2f3	M02089	chr19:7152443-7152943	brd2a	0.104889	TSS	0.176089	e2f3->chr19:7152443-7152943->brd2a	Act	0.374128	0.321296	0
vezf1a	M10107	chr19:7152443-7152943	brd2a	0.377438	TSS	0.284493	vezf1a->chr19:7152443-7152943->brd2a	Act	0.393767	0.321296	0
tcf7l1a	M05781_2.00	chr19:7152443-7152943	brd2a	0.0950762	TSS	0.235177	tcf7l1a->chr19:7152443-7152943->brd2a	Act	0.287814	0.321296	0
tfdp2	M08108_2.00	chr19:7152443-7152943	brd2a	0.0736701	TSS	0.192791	tfdp2->chr19:7152443-7152943->brd2a	Act	0.309458	0.321296	0
erfl3	M09061_2.00	chr19:7152443-7152943	brd2a	0.179517	TSS	0.193755	erfl3->chr19:7152443-7152943->brd2a	Act	0.412952	0.321296	0
tead1a	M09434_2.00	chr19:7152443-7152943	brd2a	0.302181	TSS	0.247608	tead1a->chr19:7152443-7152943->brd2a	Act	0.371967	0.321296	0
e2f3	M07083	chr19:7153043-7153543	brd2a	0.179696	TSS	0.176089	e2f3->chr19:7153043-7153543->brd2a	Act	0.374128	0.321296	0
vezf1a	M10107	chr19:7153043-7153543	brd2a	0.377438	TSS	0.284493	vezf1a->chr19:7153043-7153543->brd2a	Act	0.393767	0.321296	0
myb	M03349_2.00	chr19:7153043-7153543	brd2a	0.053844	TSS	0.200217	myb->chr19:7153043-7153543->brd2a	Act	0.268851	0.321296	0
erfl3	M09061_2.00	chr19:7153043-7153543	brd2a	0.179517	TSS	0.193755	erfl3->chr19:7153043-7153543->brd2a	Act	0.412952	0.321296	0
e2f3	M00153_2.00	chr19:7153860-7154360	brd2a	0.120101	TSS	0.176089	e2f3->chr19:7153860-7154360->brd2a	Act	0.374128	0.321296	0
e2f3	M00662_2.00	chr19:7154651-7155151	brd2a	0.107416	TSS	0.176089	e2f3->chr19:7154651-7155151->brd2a	Act	0.374128	0.321296	0
tead1a	M03576_2.00	chr19:7154651-7155151	brd2a	0.355605	TSS	0.247608	tead1a->chr19:7154651-7155151->brd2a	Act	0.371967	0.321296	0
erfl3	M09049_2.00	chr19:7154651-7155151	brd2a	0.0563963	TSS	0.193755	erfl3->chr19:7154651-7155151->brd2a	Act	0.412952	0.321296	0
tcf7l1a	M00805	chr19:7160819-7161319	brd2a	0.230037	TSS	0.235177	tcf7l1a->chr19:7160819-7161319->brd2a	Act	0.287814	0.321296	0
ep300b	M00033	chr3:53174707-53175207	brd4	0.0709988	Body	0.0698351	ep300b->chr3:53174707-53175207->brd4	Act	0.256609	0.25666	0
zic2b	M00449	chr3:53174707-53175207	brd4	0.202679	Body	0.188767	zic2b->chr3:53174707-53175207->brd4	Act	0.256339	0.25666	0
fosl2	M03870	chr3:53175320-53175820	brd4	0.573182	Body	0.26428	fosl2->chr3:53175320-53175820->brd4	Act	0.273506	0.25666	0
vezf1a	M06815	chr3:53175320-53175820	brd4	0.1712	Body	0.280231	vezf1a->chr3:53175320-53175820->brd4	Act	0.393767	0.25666	0
zic2b	M02893_2.00	chr3:53175320-53175820	brd4	0.211074	Body	0.188767	zic2b->chr3:53175320-53175820->brd4	Act	0.256339	0.25666	0
erfl3	M01493_2.00	chr3:53175837-53176337	brd4	0.0562864	Body	0.190778	erfl3->chr3:53175837-53176337->brd4	Act	0.412952	0.25666	0
zic2b	M02893_2.00	chr3:53175837-53176337	brd4	0.211074	Body	0.188767	zic2b->chr3:53175837-53176337->brd4	Act	0.256339	0.25666	0
stat3	M07065	chr3:53185342-53185842	brd4	0.338395	Body	0.165265	stat3->chr3:53185342-53185842->brd4	Act	0.327768	0.25666	0
erfl3	M04709_2.00	chr3:53185342-53185842	brd4	0.135499	Body	0.190778	erfl3->chr3:53185342-53185842->brd4	Act	0.412952	0.25666	0
stat3	M09714	chr3:53155931-53156431	brd4	0.292584	TSS	0.165265	stat3->chr3:53155931-53156431->brd4	Act	0.327768	0.25666	0
vezf1a	M10107	chr3:53155931-53156431	brd4	0.377438	TSS	0.280231	vezf1a->chr3:53155931-53156431->brd4	Act	0.393767	0.25666	0
erfl3	M04801_2.00	chr3:53155931-53156431	brd4	0.15019	TSS	0.190778	erfl3->chr3:53155931-53156431->brd4	Act	0.412952	0.25666	0
ar	M08189	chr2:6733892-6734392	brinp3b	0.387419	Body	0.243029	ar->chr2:6733892-6734392->brinp3b	Act	0.456809	0.360415	0
rxraa	M04787	chr2:6526999-6527499	brinp3b	0.0608	Inter	0.131732	rxraa->chr2:6526999-6527499->brinp3b	Act	0.560488	0.360415	0
ar	M11120_2.00	chr2:6526999-6527499	brinp3b	0.160941	Inter	0.243029	ar->chr2:6526999-6527499->brinp3b	Act	0.456809	0.360415	0
nr3c2	M11120_2.00	chr2:6526999-6527499	brinp3b	0.121069	Inter	0.241966	nr3c2->chr2:6526999-6527499->brinp3b	Act	0.390207	0.360415	0
ar	M07204	chr2:6538518-6539018	brinp3b	0.317912	Inter	0.243029	ar->chr2:6538518-6539018->brinp3b	Act	0.456809	0.360415	0
vax2	M00284_2.00	chr2:6538518-6539018	brinp3b	0.0821934	Inter	0.310082	vax2->chr2:6538518-6539018->brinp3b	Act	0.459159	0.360415	0
rarab	M03354_2.00	chr2:6538518-6539018	brinp3b	0.0685019	Inter	0.239829	rarab->chr2:6538518-6539018->brinp3b	Act	0.271116	0.360415	0
rxraa	M03354_2.00	chr2:6538518-6539018	brinp3b	0.0945898	Inter	0.131732	rxraa->chr2:6538518-6539018->brinp3b	Act	0.560488	0.360415	0
nr3c2	M09331_2.00	chr2:6538518-6539018	brinp3b	0.337032	Inter	0.241966	nr3c2->chr2:6538518-6539018->brinp3b	Act	0.390207	0.360415	0
ar	M09609_2.00	chr2:6572108-6572608	brinp3b	0.137554	Inter	0.243029	ar->chr2:6572108-6572608->brinp3b	Act	0.456809	0.360415	0
nr3c2	M09609_2.00	chr2:6572108-6572608	brinp3b	0.0919	Inter	0.241966	nr3c2->chr2:6572108-6572608->brinp3b	Act	0.390207	0.360415	0
vax2	M05219_2.00	chr2:6614772-6615272	brinp3b	0.077806	Inter	0.310082	vax2->chr2:6614772-6615272->brinp3b	Act	0.459159	0.360415	0
rxraa	M00966	chr2:6734548-6735048	brinp3b	0.134742	TSS	0.131732	rxraa->chr2:6734548-6735048->brinp3b	Act	0.560488	0.360415	0
rarab	M05592_2.00	chr2:6734548-6735048	brinp3b	0.0611507	TSS	0.239829	rarab->chr2:6734548-6735048->brinp3b	Act	0.271116	0.360415	0
lhx2b	M04386	chr21:19174828-19175328	btc	0.0522425	Inter	0.163598	lhx2b->chr21:19174828-19175328->btc	Act	0.275906	0.299291	0
rarab	M09273_2.00	chr21:19174828-19175328	btc	0.144277	Inter	0.175848	rarab->chr21:19174828-19175328->btc	Act	0.271116	0.299291	0
lhx2b	M03172_2.00	chr21:19480851-19481351	btc	0.125533	Inter	0.163598	lhx2b->chr21:19480851-19481351->btc	Act	0.275906	0.299291	0
ascl1a	M09767	chr15:30695598-30696098	BX000438.1	0.0571486	Inter	0.202572	ascl1a->chr15:30695598-30696098->BX000438.1	Act	0.349897	0.294478	0
vezf1a	M10107	chr15:30695598-30696098	BX000438.1	0.377438	Inter	0.198507	vezf1a->chr15:30695598-30696098->BX000438.1	Act	0.393767	0.294478	0
sox13	M05791_2.00	chr15:30695598-30696098	BX000438.1	0.534961	Inter	0.182364	sox13->chr15:30695598-30696098->BX000438.1	Act	0.295973	0.294478	0
ascl1a	M09767	chr15:30700658-30701158	BX000438.1	0.0571486	Inter	0.202572	ascl1a->chr15:30700658-30701158->BX000438.1	Act	0.349897	0.294478	0
zic2b	M00137_2.00	chr15:30700658-30701158	BX000438.1	0.163334	Inter	0.276903	zic2b->chr15:30700658-30701158->BX000438.1	Act	0.256339	0.294478	0
gli2a	M04402_2.00	chr15:30700658-30701158	BX000438.1	0.0887611	Inter	0.206898	gli2a->chr15:30700658-30701158->BX000438.1	Act	0.398694	0.294478	0
fosl2	M03870	chr15:30721968-30722468	BX000438.1	0.573182	Inter	0.230867	fosl2->chr15:30721968-30722468->BX000438.1	Act	0.273506	0.294478	0
gli2a	M03902	chr15:30721968-30722468	BX000438.1	0.339781	Inter	0.206898	gli2a->chr15:30721968-30722468->BX000438.1	Act	0.398694	0.294478	0
foxj1a	M00161_2.00	chr15:30721968-30722468	BX000438.1	0.063146	Inter	0.187878	foxj1a->chr15:30721968-30722468->BX000438.1	Act	0.450403	0.294478	0
sox13	M11331_2.00	chr15:30721968-30722468	BX000438.1	0.537607	Inter	0.182364	sox13->chr15:30721968-30722468->BX000438.1	Act	0.295973	0.294478	0
ascl1a	M09767	chr15:30735751-30736251	BX000438.1	0.0571486	Inter	0.202572	ascl1a->chr15:30735751-30736251->BX000438.1	Act	0.349897	0.294478	0
rfx2	M10355	chr15:30735751-30736251	BX000438.1	0.35036	Inter	0.209807	rfx2->chr15:30735751-30736251->BX000438.1	Act	0.396514	0.294478	0
zic2b	M04491_2.00	chr15:30735751-30736251	BX000438.1	0.221103	Inter	0.276903	zic2b->chr15:30735751-30736251->BX000438.1	Act	0.256339	0.294478	0
sox13	M08168_2.00	chr15:30735751-30736251	BX000438.1	0.58539	Inter	0.182364	sox13->chr15:30735751-30736251->BX000438.1	Act	0.295973	0.294478	0
erfl3	M09058_2.00	chr15:30735751-30736251	BX000438.1	0.383132	Inter	0.193743	erfl3->chr15:30735751-30736251->BX000438.1	Act	0.412952	0.294478	0
tcf7l1a	M09400_2.00	chr15:30735751-30736251	BX000438.1	0.355136	Inter	0.239805	tcf7l1a->chr15:30735751-30736251->BX000438.1	Act	0.287814	0.294478	0
vezf1a	M06815	chr15:30743073-30743573	BX000438.1	0.1712	Inter	0.198507	vezf1a->chr15:30743073-30743573->BX000438.1	Act	0.393767	0.294478	0
erfl3	M08111_2.00	chr15:30743073-30743573	BX000438.1	0.357467	Inter	0.193743	erfl3->chr15:30743073-30743573->BX000438.1	Act	0.412952	0.294478	0
sox13	M00201_2.00	chr15:30750582-30751082	BX000438.1	0.235587	Inter	0.182364	sox13->chr15:30750582-30751082->BX000438.1	Act	0.295973	0.294478	1.48867
sox13	M00197_2.00	chr15:30803044-30803544	BX000438.1	0.31565	Inter	0.182364	sox13->chr15:30803044-30803544->BX000438.1	Act	0.295973	0.294478	0
fosl2	M03870	chr15:30853804-30854304	BX000438.1	0.573182	Inter	0.230867	fosl2->chr15:30853804-30854304->BX000438.1	Act	0.273506	0.294478	1.58875
sox13	M03524_2.00	chr15:30853804-30854304	BX000438.1	0.0936292	Inter	0.182364	sox13->chr15:30853804-30854304->BX000438.1	Act	0.295973	0.294478	1.58875
erfl3	M08111_2.00	chr15:30853804-30854304	BX000438.1	0.357467	Inter	0.193743	erfl3->chr15:30853804-30854304->BX000438.1	Act	0.412952	0.294478	1.58875
tcf7l1a	M01594	chr15:30902967-30903467	BX000438.1	0.313715	Inter	0.239805	tcf7l1a->chr15:30902967-30903467->BX000438.1	Act	0.287814	0.294478	0
zic2b	M02940	chr15:30902967-30903467	BX000438.1	0.140495	Inter	0.276903	zic2b->chr15:30902967-30903467->BX000438.1	Act	0.256339	0.294478	0
rfx2	M09651	chr15:30902967-30903467	BX000438.1	0.34919	Inter	0.209807	rfx2->chr15:30902967-30903467->BX000438.1	Act	0.396514	0.294478	0
sox13	M00213_2.00	chr15:30902967-30903467	BX000438.1	0.444439	Inter	0.182364	sox13->chr15:30902967-30903467->BX000438.1	Act	0.295973	0.294478	0
foxj1a	M03055_2.00	chr15:30902967-30903467	BX000438.1	0.0938663	Inter	0.187878	foxj1a->chr15:30902967-30903467->BX000438.1	Act	0.450403	0.294478	0
gli2a	M03902	chr15:30912912-30913412	BX000438.1	0.339781	Inter	0.206898	gli2a->chr15:30912912-30913412->BX000438.1	Act	0.398694	0.294478	0
sox13	M00202_2.00	chr15:30912912-30913412	BX000438.1	0.146741	Inter	0.182364	sox13->chr15:30912912-30913412->BX000438.1	Act	0.295973	0.294478	0
fosl2	M07828_2.00	chr15:30912912-30913412	BX000438.1	0.5831	Inter	0.230867	fosl2->chr15:30912912-30913412->BX000438.1	Act	0.273506	0.294478	0
sox13	M03483_2.00	chr15:30985984-30986484	BX000438.1	0.0999395	Inter	0.182364	sox13->chr15:30985984-30986484->BX000438.1	Act	0.295973	0.294478	0
fosl2	M08069_2.00	chr15:30985984-30986484	BX000438.1	0.582258	Inter	0.230867	fosl2->chr15:30985984-30986484->BX000438.1	Act	0.273506	0.294478	0
ar	M00447	chr17:14093928-14094428	BX004996.1	0.204659	Inter	0.323871	ar->chr17:14093928-14094428->BX004996.1	Act	0.456809	0.496031	1.67535
nr3c2	M04477	chr17:14093928-14094428	BX004996.1	0.28069	Inter	0.300321	nr3c2->chr17:14093928-14094428->BX004996.1	Act	0.390207	0.496031	1.67535
sox13	M03483_2.00	chr17:14093928-14094428	BX004996.1	0.0999395	Inter	0.494471	sox13->chr17:14093928-14094428->BX004996.1	Act	0.295973	0.496031	1.67535
nr2e1	M08155_2.00	chr17:14093928-14094428	BX004996.1	0.184758	Inter	0.303125	nr2e1->chr17:14093928-14094428->BX004996.1	Act	0.345467	0.496031	1.67535
rxraa	M08155_2.00	chr17:14093928-14094428	BX004996.1	0.146519	Inter	0.350582	rxraa->chr17:14093928-14094428->BX004996.1	Act	0.560488	0.496031	1.67535
gli2a	M03902	chr17:14100552-14101052	BX004996.1	0.339781	Inter	0.450274	gli2a->chr17:14100552-14101052->BX004996.1	Act	0.398694	0.496031	0.486082
lhx2b	M00288_2.00	chr17:14100552-14101052	BX004996.1	0.0788753	Inter	0.351714	lhx2b->chr17:14100552-14101052->BX004996.1	Act	0.275906	0.496031	0.486082
tead1a	M03576_2.00	chr17:14100552-14101052	BX004996.1	0.355605	Inter	0.257888	tead1a->chr17:14100552-14101052->BX004996.1	Act	0.371967	0.496031	0.486082
foxo1a	M03823	chr17:14106592-14107092	BX004996.1	0.456812	Inter	0.288536	foxo1a->chr17:14106592-14107092->BX004996.1	Act	0.378908	0.496031	0
tcf7l1b	M00712_2.00	chr17:14106592-14107092	BX004996.1	0.313419	Inter	0.309762	tcf7l1b->chr17:14106592-14107092->BX004996.1	Act	0.390873	0.496031	0
tcf7l2	M00712_2.00	chr17:14106592-14107092	BX004996.1	0.358468	Inter	0.289334	tcf7l2->chr17:14106592-14107092->BX004996.1	Act	0.32183	0.496031	0
sox13	M05893_2.00	chr17:14106592-14107092	BX004996.1	0.418904	Inter	0.494471	sox13->chr17:14106592-14107092->BX004996.1	Act	0.295973	0.496031	0
lhx2b	M06230_2.00	chr17:14106592-14107092	BX004996.1	0.191007	Inter	0.351714	lhx2b->chr17:14106592-14107092->BX004996.1	Act	0.275906	0.496031	0
lhx2b	M07047	chr17:14107193-14107693	BX004996.1	0.193645	Inter	0.351714	lhx2b->chr17:14107193-14107693->BX004996.1	Act	0.275906	0.496031	0
ar	M00962	chr17:14142146-14142646	BX004996.1	0.28152	Inter	0.323871	ar->chr17:14142146-14142646->BX004996.1	Act	0.456809	0.496031	0
lhx2b	M03183_2.00	chr17:14142146-14142646	BX004996.1	0.0854321	Inter	0.351714	lhx2b->chr17:14142146-14142646->BX004996.1	Act	0.275906	0.496031	0
sox13	M05893_2.00	chr17:14142146-14142646	BX004996.1	0.418904	Inter	0.494471	sox13->chr17:14142146-14142646->BX004996.1	Act	0.295973	0.496031	0
ar	M00962	chr17:14142747-14143247	BX004996.1	0.28152	Inter	0.323871	ar->chr17:14142747-14143247->BX004996.1	Act	0.456809	0.496031	0
rarab	M02787	chr17:14142747-14143247	BX004996.1	0.0506533	Inter	0.304266	rarab->chr17:14142747-14143247->BX004996.1	Act	0.271116	0.496031	0
lhx2b	M07047	chr17:14142747-14143247	BX004996.1	0.193645	Inter	0.351714	lhx2b->chr17:14142747-14143247->BX004996.1	Act	0.275906	0.496031	0
rxraa	M09833	chr17:14142747-14143247	BX004996.1	0.26616	Inter	0.350582	rxraa->chr17:14142747-14143247->BX004996.1	Act	0.560488	0.496031	0
rorb	M00810_2.00	chr17:14142747-14143247	BX004996.1	0.119132	Inter	0.26468	rorb->chr17:14142747-14143247->BX004996.1	Act	0.518637	0.496031	0
nr2e1	M06428_2.00	chr17:14142747-14143247	BX004996.1	0.0668022	Inter	0.303125	nr2e1->chr17:14142747-14143247->BX004996.1	Act	0.345467	0.496031	0
nr3c2	M09609_2.00	chr17:14142747-14143247	BX004996.1	0.0919	Inter	0.300321	nr3c2->chr17:14142747-14143247->BX004996.1	Act	0.390207	0.496031	0
rxraa	M01153	chr17:14263207-14263707	BX004996.1	0.199716	Inter	0.350582	rxraa->chr17:14263207-14263707->BX004996.1	Act	0.560488	0.496031	0
foxo1a	M08481	chr17:14263207-14263707	BX004996.1	0.179844	Inter	0.288536	foxo1a->chr17:14263207-14263707->BX004996.1	Act	0.378908	0.496031	0
vezf1a	M10107	chr17:14263207-14263707	BX004996.1	0.377438	Inter	0.0424812	vezf1a->chr17:14263207-14263707->BX004996.1	Act	0.393767	0.496031	0
nr2e1	M00182_2.00	chr17:14263207-14263707	BX004996.1	0.208183	Inter	0.303125	nr2e1->chr17:14263207-14263707->BX004996.1	Act	0.345467	0.496031	0
rorb	M03372_2.00	chr17:14263207-14263707	BX004996.1	0.0618034	Inter	0.26468	rorb->chr17:14263207-14263707->BX004996.1	Act	0.518637	0.496031	0
rarab	M03391_2.00	chr17:14263207-14263707	BX004996.1	0.0695662	Inter	0.304266	rarab->chr17:14263207-14263707->BX004996.1	Act	0.271116	0.496031	0
sox13	M03487_2.00	chr17:14263207-14263707	BX004996.1	0.14668	Inter	0.494471	sox13->chr17:14263207-14263707->BX004996.1	Act	0.295973	0.496031	0
lhx2b	M07047	chr17:14419241-14419741	BX004996.1	0.193645	Inter	0.351714	lhx2b->chr17:14419241-14419741->BX004996.1	Act	0.275906	0.496031	0
nr2e1	M08220_2.00	chr17:14419241-14419741	BX004996.1	0.0537304	Inter	0.303125	nr2e1->chr17:14419241-14419741->BX004996.1	Act	0.345467	0.496031	0
rxraa	M04489	chr17:14454749-14455249	BX004996.1	0.102528	Inter	0.350582	rxraa->chr17:14454749-14455249->BX004996.1	Act	0.560488	0.496031	0
fosl2	M10237	chr17:14454749-14455249	BX004996.1	0.582792	Inter	0.196668	fosl2->chr17:14454749-14455249->BX004996.1	Act	0.273506	0.496031	0
nr2e1	M03360_2.00	chr17:14454749-14455249	BX004996.1	0.145426	Inter	0.303125	nr2e1->chr17:14454749-14455249->BX004996.1	Act	0.345467	0.496031	0
rorb	M03377_2.00	chr17:14454749-14455249	BX004996.1	0.0757314	Inter	0.26468	rorb->chr17:14454749-14455249->BX004996.1	Act	0.518637	0.496031	0
foxo1a	M03823	chr17:14468236-14468736	BX004996.1	0.456812	Inter	0.288536	foxo1a->chr17:14468236-14468736->BX004996.1	Act	0.378908	0.496031	0
rxraa	M04787	chr17:14468236-14468736	BX004996.1	0.0608	Inter	0.350582	rxraa->chr17:14468236-14468736->BX004996.1	Act	0.560488	0.496031	0
rxraa	M00647	chr17:14512485-14512985	BX004996.1	0.0660954	Inter	0.350582	rxraa->chr17:14512485-14512985->BX004996.1	Act	0.560488	0.496031	0
foxo1a	M03823	chr17:14512485-14512985	BX004996.1	0.456812	Inter	0.288536	foxo1a->chr17:14512485-14512985->BX004996.1	Act	0.378908	0.496031	0
sox13	M00197_2.00	chr17:14512485-14512985	BX004996.1	0.31565	Inter	0.494471	sox13->chr17:14512485-14512985->BX004996.1	Act	0.295973	0.496031	0
lhx2b	M03181_2.00	chr17:14512485-14512985	BX004996.1	0.122299	Inter	0.351714	lhx2b->chr17:14512485-14512985->BX004996.1	Act	0.275906	0.496031	0
nr2e1	M08220_2.00	chr17:14512485-14512985	BX004996.1	0.0537304	Inter	0.303125	nr2e1->chr17:14512485-14512985->BX004996.1	Act	0.345467	0.496031	0
ar	M09609_2.00	chr17:14512485-14512985	BX004996.1	0.137554	Inter	0.323871	ar->chr17:14512485-14512985->BX004996.1	Act	0.456809	0.496031	0
nr3c2	M09609_2.00	chr17:14512485-14512985	BX004996.1	0.0919	Inter	0.300321	nr3c2->chr17:14512485-14512985->BX004996.1	Act	0.390207	0.496031	0
rorb	M03394_2.00	chr19:9365905-9366405	BX005154.1	0.115117	Inter	0.282533	rorb->chr19:9365905-9366405->BX005154.1	Act	0.518637	0.290551	0
e2f1	M00737	chr19:9381737-9382237	BX005154.1	0.147547	Inter	0.163416	e2f1->chr19:9381737-9382237->BX005154.1	Act	0.349346	0.290551	0
gli2a	M01037	chr19:9381737-9382237	BX005154.1	0.0839593	Inter	0.22393	gli2a->chr19:9381737-9382237->BX005154.1	Act	0.398694	0.290551	0
rorb	M06427_2.00	chr19:9381737-9382237	BX005154.1	0.181697	Inter	0.282533	rorb->chr19:9381737-9382237->BX005154.1	Act	0.518637	0.290551	0
e2f3	M07939_2.00	chr19:9381737-9382237	BX005154.1	0.205367	Inter	0.183658	e2f3->chr19:9381737-9382237->BX005154.1	Act	0.374128	0.290551	0
erfl3	M09048_2.00	chr19:9381737-9382237	BX005154.1	0.232452	Inter	0.210078	erfl3->chr19:9381737-9382237->BX005154.1	Act	0.412952	0.290551	0
tcf7l2	M09392_2.00	chr19:9381737-9382237	BX005154.1	0.465533	Inter	0.197952	tcf7l2->chr19:9381737-9382237->BX005154.1	Act	0.32183	0.290551	0
tcf7l2	M07136	chr19:9382596-9383096	BX005154.1	0.232667	Inter	0.197952	tcf7l2->chr19:9382596-9383096->BX005154.1	Act	0.32183	0.290551	0
erfl3	M04709_2.00	chr19:9382596-9383096	BX005154.1	0.135499	Inter	0.210078	erfl3->chr19:9382596-9383096->BX005154.1	Act	0.412952	0.290551	0
rorb	M09612_2.00	chr19:9382596-9383096	BX005154.1	0.175628	Inter	0.282533	rorb->chr19:9382596-9383096->BX005154.1	Act	0.518637	0.290551	0
fosl2	M08923	chr19:9386725-9387225	BX005154.1	0.571601	Inter	0.24768	fosl2->chr19:9386725-9387225->BX005154.1	Act	0.273506	0.290551	0
tcf7l2	M03512_2.00	chr19:9386725-9387225	BX005154.1	0.210975	Inter	0.197952	tcf7l2->chr19:9386725-9387225->BX005154.1	Act	0.32183	0.290551	0
e2f3	M09034_2.00	chr19:9386725-9387225	BX005154.1	0.179748	Inter	0.183658	e2f3->chr19:9386725-9387225->BX005154.1	Act	0.374128	0.290551	0
erfl3	M09061_2.00	chr19:9386725-9387225	BX005154.1	0.179517	Inter	0.210078	erfl3->chr19:9386725-9387225->BX005154.1	Act	0.412952	0.290551	0
rorb	M09276_2.00	chr19:9386725-9387225	BX005154.1	0.524613	Inter	0.282533	rorb->chr19:9386725-9387225->BX005154.1	Act	0.518637	0.290551	0
e2f1	M00024	chr19:9400316-9400816	BX005154.1	0.0747576	Inter	0.163416	e2f1->chr19:9400316-9400816->BX005154.1	Act	0.349346	0.290551	0
gli2a	M01703	chr19:9400316-9400816	BX005154.1	0.15947	Inter	0.22393	gli2a->chr19:9400316-9400816->BX005154.1	Act	0.398694	0.290551	0
e2f3	M10210	chr19:9400316-9400816	BX005154.1	0.216463	Inter	0.183658	e2f3->chr19:9400316-9400816->BX005154.1	Act	0.374128	0.290551	0
rorb	M06412_2.00	chr19:9400316-9400816	BX005154.1	0.25014	Inter	0.282533	rorb->chr19:9400316-9400816->BX005154.1	Act	0.518637	0.290551	0
e2f3	M07083	chr19:9402382-9402882	BX005154.1	0.179696	Inter	0.183658	e2f3->chr19:9402382-9402882->BX005154.1	Act	0.374128	0.290551	0
e2f1	M08874	chr19:9402382-9402882	BX005154.1	0.166133	Inter	0.163416	e2f1->chr19:9402382-9402882->BX005154.1	Act	0.349346	0.290551	0
vezf1a	M10107	chr19:9402382-9402882	BX005154.1	0.377438	Inter	0.262624	vezf1a->chr19:9402382-9402882->BX005154.1	Act	0.393767	0.290551	0
tead1a	M03576_2.00	chr19:9402382-9402882	BX005154.1	0.355605	Inter	0.28897	tead1a->chr19:9402382-9402882->BX005154.1	Act	0.371967	0.290551	0
erfl3	M08111_2.00	chr19:9402382-9402882	BX005154.1	0.357467	Inter	0.210078	erfl3->chr19:9402382-9402882->BX005154.1	Act	0.412952	0.290551	0
ascl1a	M09767	chr19:9429538-9430038	BX005154.1	0.0571486	Inter	0.225775	ascl1a->chr19:9429538-9430038->BX005154.1	Act	0.349897	0.290551	0
e2f1	M00024	chr19:9461534-9462034	BX005154.1	0.0747576	Inter	0.163416	e2f1->chr19:9461534-9462034->BX005154.1	Act	0.349346	0.290551	0
e2f3	M07083	chr19:9461534-9462034	BX005154.1	0.179696	Inter	0.183658	e2f3->chr19:9461534-9462034->BX005154.1	Act	0.374128	0.290551	0
erfl3	M04794_2.00	chr19:9502121-9502621	BX005154.1	0.0569095	Inter	0.210078	erfl3->chr19:9502121-9502621->BX005154.1	Act	0.412952	0.290551	0
rorb	M09282_2.00	chr19:9502121-9502621	BX005154.1	0.624927	Inter	0.282533	rorb->chr19:9502121-9502621->BX005154.1	Act	0.518637	0.290551	0
stat3	M00777	chr14:32635967-32636467	BX088596.1	0.197937	Inter	0.33363	stat3->chr14:32635967-32636467->BX088596.1	Act	0.327768	0.988528	0
foxo1a	M01216	chr14:32635967-32636467	BX088596.1	0.3512	Inter	0.38561	foxo1a->chr14:32635967-32636467->BX088596.1	Act	0.378908	0.988528	0
sox13	M00205_2.00	chr14:32635967-32636467	BX088596.1	0.334943	Inter	0.43027	sox13->chr14:32635967-32636467->BX088596.1	Act	0.295973	0.988528	0
tcf7l2	M00712_2.00	chr14:32635967-32636467	BX088596.1	0.358468	Inter	0.428037	tcf7l2->chr14:32635967-32636467->BX088596.1	Act	0.32183	0.988528	0
lhx2b	M05068_2.00	chr14:32635967-32636467	BX088596.1	0.121377	Inter	0.532325	lhx2b->chr14:32635967-32636467->BX088596.1	Act	0.275906	0.988528	0
vax2	M05143_2.00	chr14:32635967-32636467	BX088596.1	0.165068	Inter	0.38311	vax2->chr14:32635967-32636467->BX088596.1	Act	0.459159	0.988528	0
lhx2b	M05219_2.00	chr14:32638253-32638753	BX088596.1	0.148922	Inter	0.532325	lhx2b->chr14:32638253-32638753->BX088596.1	Act	0.275906	0.988528	0
vax2	M05219_2.00	chr14:32638253-32638753	BX088596.1	0.077806	Inter	0.38311	vax2->chr14:32638253-32638753->BX088596.1	Act	0.459159	0.988528	0
foxo1a	M03823	chr14:32670184-32670684	BX088596.1	0.456812	Inter	0.38561	foxo1a->chr14:32670184-32670684->BX088596.1	Act	0.378908	0.988528	0
tcf7l2	M04775	chr14:32670184-32670684	BX088596.1	0.188685	Inter	0.428037	tcf7l2->chr14:32670184-32670684->BX088596.1	Act	0.32183	0.988528	0
sox13	M02718_2.00	chr14:32670184-32670684	BX088596.1	0.363546	Inter	0.43027	sox13->chr14:32670184-32670684->BX088596.1	Act	0.295973	0.988528	0
lhx2b	M03164_2.00	chr14:32670184-32670684	BX088596.1	0.148772	Inter	0.532325	lhx2b->chr14:32670184-32670684->BX088596.1	Act	0.275906	0.988528	0
vax2	M03164_2.00	chr14:32670184-32670684	BX088596.1	0.0907791	Inter	0.38311	vax2->chr14:32670184-32670684->BX088596.1	Act	0.459159	0.988528	0
tead1b	M05825_2.00	chr14:32670184-32670684	BX088596.1	0.124888	Inter	0.28848	tead1b->chr14:32670184-32670684->BX088596.1	Act	0.42071	0.988528	0
rarab	M09273_2.00	chr14:32670184-32670684	BX088596.1	0.144277	Inter	0.538168	rarab->chr14:32670184-32670684->BX088596.1	Act	0.271116	0.988528	0
rorb	M09273_2.00	chr14:32670184-32670684	BX088596.1	0.113091	Inter	0.04983	rorb->chr14:32670184-32670684->BX088596.1	Act	0.518637	0.988528	0
sox13	M09787	chr14:32682991-32683491	BX088596.1	0.540612	Inter	0.43027	sox13->chr14:32682991-32683491->BX088596.1	Act	0.295973	0.988528	0
rarab	M10044	chr14:32682991-32683491	BX088596.1	0.0841343	Inter	0.538168	rarab->chr14:32682991-32683491->BX088596.1	Act	0.271116	0.988528	0
lhx2b	M03190_2.00	chr14:32682991-32683491	BX088596.1	0.276705	Inter	0.532325	lhx2b->chr14:32682991-32683491->BX088596.1	Act	0.275906	0.988528	0
vax2	M03190_2.00	chr14:32682991-32683491	BX088596.1	0.166275	Inter	0.38311	vax2->chr14:32682991-32683491->BX088596.1	Act	0.459159	0.988528	0
rorb	M09277_2.00	chr14:32682991-32683491	BX088596.1	0.158295	Inter	0.04983	rorb->chr14:32682991-32683491->BX088596.1	Act	0.518637	0.988528	0
vdrb	M02398_2.00	chr14:32689895-32690395	BX088596.1	0.0874299	Inter	0.384081	vdrb->chr14:32689895-32690395->BX088596.1	Act	0.421237	0.988528	0
lhx2b	M07047	chr14:32715584-32716084	BX088596.1	0.193645	Inter	0.532325	lhx2b->chr14:32715584-32716084->BX088596.1	Act	0.275906	0.988528	0
vax2	M00413_2.00	chr14:32715584-32716084	BX088596.1	0.111292	Inter	0.38311	vax2->chr14:32715584-32716084->BX088596.1	Act	0.459159	0.988528	0
sox13	M00710_2.00	chr14:32715584-32716084	BX088596.1	0.191909	Inter	0.43027	sox13->chr14:32715584-32716084->BX088596.1	Act	0.295973	0.988528	0
tead1b	M09435_2.00	chr14:32715584-32716084	BX088596.1	0.118992	Inter	0.28848	tead1b->chr14:32715584-32716084->BX088596.1	Act	0.42071	0.988528	0
nfixa	M02050	chr14:32740368-32740868	BX088596.1	0.351999	Inter	0.366783	nfixa->chr14:32740368-32740868->BX088596.1	Act	0.512419	0.988528	0
rorb	M00813_2.00	chr14:32740368-32740868	BX088596.1	0.0999314	Inter	0.04983	rorb->chr14:32740368-32740868->BX088596.1	Act	0.518637	0.988528	0
rarab	M06427_2.00	chr14:32740368-32740868	BX088596.1	0.0577549	Inter	0.538168	rarab->chr14:32740368-32740868->BX088596.1	Act	0.271116	0.988528	0
ar	M00962	chr14:32753191-32753691	BX088596.1	0.28152	Inter	0.649053	ar->chr14:32753191-32753691->BX088596.1	Act	0.456809	0.988528	0
vdrb	M02403_2.00	chr14:32753191-32753691	BX088596.1	0.121503	Inter	0.384081	vdrb->chr14:32753191-32753691->BX088596.1	Act	0.421237	0.988528	0
rarab	M03391_2.00	chr14:32753191-32753691	BX088596.1	0.0695662	Inter	0.538168	rarab->chr14:32753191-32753691->BX088596.1	Act	0.271116	0.988528	0
rorb	M03391_2.00	chr14:32753191-32753691	BX088596.1	0.0504279	Inter	0.04983	rorb->chr14:32753191-32753691->BX088596.1	Act	0.518637	0.988528	0
sox13	M03507_2.00	chr14:32753191-32753691	BX088596.1	0.113476	Inter	0.43027	sox13->chr14:32753191-32753691->BX088596.1	Act	0.295973	0.988528	0
lhx2b	M06277_2.00	chr14:32753191-32753691	BX088596.1	0.0501803	Inter	0.532325	lhx2b->chr14:32753191-32753691->BX088596.1	Act	0.275906	0.988528	0
tead1b	M04142	chr14:32754846-32755346	BX088596.1	0.0917647	Inter	0.28848	tead1b->chr14:32754846-32755346->BX088596.1	Act	0.42071	0.988528	0
gli2a	M07292	chr14:32754846-32755346	BX088596.1	0.122262	Inter	0.548958	gli2a->chr14:32754846-32755346->BX088596.1	Act	0.398694	0.988528	0
nfixa	M07363	chr14:32754846-32755346	BX088596.1	0.212682	Inter	0.366783	nfixa->chr14:32754846-32755346->BX088596.1	Act	0.512419	0.988528	0
sox13	M08899	chr14:32754846-32755346	BX088596.1	0.431399	Inter	0.43027	sox13->chr14:32754846-32755346->BX088596.1	Act	0.295973	0.988528	0
klf12b	M08857_2.00	chr14:32754846-32755346	BX088596.1	0.0584093	Inter	0.464018	klf12b->chr14:32754846-32755346->BX088596.1	Act	0.342959	0.988528	0
vax2	M04447	chr14:32765999-32766499	BX088596.1	0.101504	Inter	0.38311	vax2->chr14:32765999-32766499->BX088596.1	Act	0.459159	0.988528	0
lhx2b	M07047	chr14:32765999-32766499	BX088596.1	0.193645	Inter	0.532325	lhx2b->chr14:32765999-32766499->BX088596.1	Act	0.275906	0.988528	0
ar	M08189	chr14:32765999-32766499	BX088596.1	0.387419	Inter	0.649053	ar->chr14:32765999-32766499->BX088596.1	Act	0.456809	0.988528	0
rorb	M02388_2.00	chr14:32765999-32766499	BX088596.1	0.218702	Inter	0.04983	rorb->chr14:32765999-32766499->BX088596.1	Act	0.518637	0.988528	0
rarab	M06427_2.00	chr14:32765999-32766499	BX088596.1	0.0577549	Inter	0.538168	rarab->chr14:32765999-32766499->BX088596.1	Act	0.271116	0.988528	0
lhx2b	M03183_2.00	chr14:32808046-32808546	BX088596.1	0.0854321	Inter	0.532325	lhx2b->chr14:32808046-32808546->BX088596.1	Act	0.275906	0.988528	0
nfixa	M05741_2.00	chr14:32808046-32808546	BX088596.1	0.375635	Inter	0.366783	nfixa->chr14:32808046-32808546->BX088596.1	Act	0.512419	0.988528	0
lhx2b	M07047	chr14:32883058-32883558	BX088596.1	0.193645	Inter	0.532325	lhx2b->chr14:32883058-32883558->BX088596.1	Act	0.275906	0.988528	0
ar	M08189	chr14:32883058-32883558	BX088596.1	0.387419	Inter	0.649053	ar->chr14:32883058-32883558->BX088596.1	Act	0.456809	0.988528	0
foxo1a	M08295	chr14:32883058-32883558	BX088596.1	0.175832	Inter	0.38561	foxo1a->chr14:32883058-32883558->BX088596.1	Act	0.378908	0.988528	0
rorb	M08782	chr14:32883058-32883558	BX088596.1	0.178997	Inter	0.04983	rorb->chr14:32883058-32883558->BX088596.1	Act	0.518637	0.988528	0
sox13	M00202_2.00	chr14:32883058-32883558	BX088596.1	0.146741	Inter	0.43027	sox13->chr14:32883058-32883558->BX088596.1	Act	0.295973	0.988528	0
vax2	M03118_2.00	chr14:32883058-32883558	BX088596.1	0.180466	Inter	0.38311	vax2->chr14:32883058-32883558->BX088596.1	Act	0.459159	0.988528	0
rarab	M03354_2.00	chr14:32883058-32883558	BX088596.1	0.0685019	Inter	0.538168	rarab->chr14:32883058-32883558->BX088596.1	Act	0.271116	0.988528	0
tead1b	M03576_2.00	chr14:32883058-32883558	BX088596.1	0.124728	Inter	0.28848	tead1b->chr14:32883058-32883558->BX088596.1	Act	0.42071	0.988528	0
nr3c2	M07986_2.00	chr14:32883058-32883558	BX088596.1	0.279897	Inter	0.486128	nr3c2->chr14:32883058-32883558->BX088596.1	Act	0.390207	0.988528	0
foxo1a	M04257	chr14:32887465-32887965	BX088596.1	0.133348	Inter	0.38561	foxo1a->chr14:32887465-32887965->BX088596.1	Act	0.378908	0.988528	2.18332
lhx2b	M07047	chr14:32887465-32887965	BX088596.1	0.193645	Inter	0.532325	lhx2b->chr14:32887465-32887965->BX088596.1	Act	0.275906	0.988528	2.18332
rorb	M05617_2.00	chr14:32887465-32887965	BX088596.1	0.0514061	Inter	0.04983	rorb->chr14:32887465-32887965->BX088596.1	Act	0.518637	0.988528	2.18332
sox13	M05751_2.00	chr14:32887465-32887965	BX088596.1	0.590074	Inter	0.43027	sox13->chr14:32887465-32887965->BX088596.1	Act	0.295973	0.988528	2.18332
vax2	M06325_2.00	chr14:32887465-32887965	BX088596.1	0.0732205	Inter	0.38311	vax2->chr14:32887465-32887965->BX088596.1	Act	0.459159	0.988528	2.18332
rarab	M06427_2.00	chr14:32887465-32887965	BX088596.1	0.0577549	Inter	0.538168	rarab->chr14:32887465-32887965->BX088596.1	Act	0.271116	0.988528	2.18332
lhx2b	M05040_2.00	chr14:32900421-32900921	BX088596.1	0.27414	Inter	0.532325	lhx2b->chr14:32900421-32900921->BX088596.1	Act	0.275906	0.988528	0
vax2	M05040_2.00	chr14:32900421-32900921	BX088596.1	0.16119	Inter	0.38311	vax2->chr14:32900421-32900921->BX088596.1	Act	0.459159	0.988528	0
tcf7l2	M09395_2.00	chr14:32900421-32900921	BX088596.1	0.218552	Inter	0.428037	tcf7l2->chr14:32900421-32900921->BX088596.1	Act	0.32183	0.988528	0
e2f3	M10210	chr3:5937301-5937801	BX284638.2	0.216463	Body	0.169452	e2f3->chr3:5937301-5937801->BX284638.2	Act	0.374128	0.289047	3.25854
rorb	M03354_2.00	chr3:5937301-5937801	BX284638.2	0.210874	Body	0.196016	rorb->chr3:5937301-5937801->BX284638.2	Act	0.518637	0.289047	3.25854
rorb	M05621_2.00	chr3:5945244-5945744	BX284638.2	0.224714	Body	0.196016	rorb->chr3:5945244-5945744->BX284638.2	Act	0.518637	0.289047	0
zic2b	M02940	chr3:5961987-5962487	BX284638.2	0.140495	Body	0.255614	zic2b->chr3:5961987-5962487->BX284638.2	Act	0.256339	0.289047	0
rorb	M03394_2.00	chr3:5961987-5962487	BX284638.2	0.115117	Body	0.196016	rorb->chr3:5961987-5962487->BX284638.2	Act	0.518637	0.289047	0
e2f3	M00050	chr3:5964192-5964692	BX284638.2	0.171272	Body	0.169452	e2f3->chr3:5964192-5964692->BX284638.2	Act	0.374128	0.289047	0
fosl2	M08924	chr3:5964192-5964692	BX284638.2	0.0506572	Body	0.261998	fosl2->chr3:5964192-5964692->BX284638.2	Act	0.273506	0.289047	0
vezf1a	M10107	chr3:5964192-5964692	BX284638.2	0.377438	Body	0.300689	vezf1a->chr3:5964192-5964692->BX284638.2	Act	0.393767	0.289047	0
rorb	M00181_2.00	chr3:5964192-5964692	BX284638.2	0.1411	Body	0.196016	rorb->chr3:5964192-5964692->BX284638.2	Act	0.518637	0.289047	0
erfl3	M08111_2.00	chr3:5964192-5964692	BX284638.2	0.357467	Body	0.211899	erfl3->chr3:5964192-5964692->BX284638.2	Act	0.412952	0.289047	0
rfx2	M09363_2.00	chr3:5964192-5964692	BX284638.2	0.333437	Body	0.23646	rfx2->chr3:5964192-5964692->BX284638.2	Act	0.396514	0.289047	0
e2f3	M07083	chr3:5964719-5965219	BX284638.2	0.179696	TSS	0.169452	e2f3->chr3:5964719-5965219->BX284638.2	Act	0.374128	0.289047	0
rorb	M00181_2.00	chr3:5964719-5965219	BX284638.2	0.1411	TSS	0.196016	rorb->chr3:5964719-5965219->BX284638.2	Act	0.518637	0.289047	0
gli2a	M03902	chr5:47976937-47977437	BX465834.1	0.339781	Inter	0.778099	gli2a->chr5:47976937-47977437->BX465834.1	Act	0.398694	0.472021	0
lhx2b	M07047	chr5:47976937-47977437	BX465834.1	0.193645	Inter	0.590579	lhx2b->chr5:47976937-47977437->BX465834.1	Act	0.275906	0.472021	0
sox13	M08899	chr5:47976937-47977437	BX465834.1	0.431399	Inter	0.671532	sox13->chr5:47976937-47977437->BX465834.1	Act	0.295973	0.472021	0
nr2e1	M08220_2.00	chr5:47976937-47977437	BX465834.1	0.0537304	Inter	0.463114	nr2e1->chr5:47976937-47977437->BX465834.1	Act	0.345467	0.472021	0
mef2aa	M00231	chr5:47995256-47995756	BX465834.1	0.0566688	Inter	0.28222	mef2aa->chr5:47995256-47995756->BX465834.1	Act	0.308083	0.472021	0
plagl2	M05510	chr5:47995256-47995756	BX465834.1	0.139461	Inter	0.558546	plagl2->chr5:47995256-47995756->BX465834.1	Act	0.329948	0.472021	0
lhx2b	M07047	chr5:47995256-47995756	BX465834.1	0.193645	Inter	0.590579	lhx2b->chr5:47995256-47995756->BX465834.1	Act	0.275906	0.472021	0
ar	M09863	chr5:47995256-47995756	BX465834.1	0.149743	Inter	0.608362	ar->chr5:47995256-47995756->BX465834.1	Act	0.456809	0.472021	0
sox13	M03973_2.00	chr5:47995256-47995756	BX465834.1	0.217875	Inter	0.671532	sox13->chr5:47995256-47995756->BX465834.1	Act	0.295973	0.472021	0
nr3c2	M09288_2.00	chr5:47995256-47995756	BX465834.1	0.248185	Inter	0.541636	nr3c2->chr5:47995256-47995756->BX465834.1	Act	0.390207	0.472021	0
tcf7l1b	M09400_2.00	chr5:47995256-47995756	BX465834.1	0.442143	Inter	0.479658	tcf7l1b->chr5:47995256-47995756->BX465834.1	Act	0.390873	0.472021	0
tcf7l2	M09400_2.00	chr5:47995256-47995756	BX465834.1	0.523976	Inter	0.602669	tcf7l2->chr5:47995256-47995756->BX465834.1	Act	0.32183	0.472021	0
nr2e1	M09688_2.00	chr5:47995256-47995756	BX465834.1	0.0915767	Inter	0.463114	nr2e1->chr5:47995256-47995756->BX465834.1	Act	0.345467	0.472021	0
rorb	M01722	chr5:48026906-48027406	BX465834.1	0.411551	Inter	0.46668	rorb->chr5:48026906-48027406->BX465834.1	Act	0.518637	0.472021	0
lhx2b	M07047	chr5:48026906-48027406	BX465834.1	0.193645	Inter	0.590579	lhx2b->chr5:48026906-48027406->BX465834.1	Act	0.275906	0.472021	0
rarab	M00819_2.00	chr5:48026906-48027406	BX465834.1	0.0578609	Inter	0.553382	rarab->chr5:48026906-48027406->BX465834.1	Act	0.271116	0.472021	0
rorb	M01722	chr5:48027413-48027913	BX465834.1	0.411551	Inter	0.46668	rorb->chr5:48027413-48027913->BX465834.1	Act	0.518637	0.472021	1.58865
rarab	M00819_2.00	chr5:48027413-48027913	BX465834.1	0.0578609	Inter	0.553382	rarab->chr5:48027413-48027913->BX465834.1	Act	0.271116	0.472021	1.58865
tead1a	M03579_2.00	chr5:48027413-48027913	BX465834.1	0.334119	Inter	0.464106	tead1a->chr5:48027413-48027913->BX465834.1	Act	0.371967	0.472021	1.58865
fosl2	M04338_2.00	chr5:48027413-48027913	BX465834.1	0.134349	Inter	0.279158	fosl2->chr5:48027413-48027913->BX465834.1	Act	0.273506	0.472021	1.58865
lhx2b	M05040_2.00	chr5:48027413-48027913	BX465834.1	0.27414	Inter	0.590579	lhx2b->chr5:48027413-48027913->BX465834.1	Act	0.275906	0.472021	1.58865
nr2e1	M06424_2.00	chr5:48027413-48027913	BX465834.1	0.218526	Inter	0.463114	nr2e1->chr5:48027413-48027913->BX465834.1	Act	0.345467	0.472021	1.58865
sox13	M11331_2.00	chr5:48027413-48027913	BX465834.1	0.537607	Inter	0.671532	sox13->chr5:48027413-48027913->BX465834.1	Act	0.295973	0.472021	1.58865
lhx2b	M04385	chr5:48060082-48060582	BX465834.1	0.172889	Inter	0.590579	lhx2b->chr5:48060082-48060582->BX465834.1	Act	0.275906	0.472021	0
mef2aa	M09637	chr5:48060082-48060582	BX465834.1	0.0873321	Inter	0.28222	mef2aa->chr5:48060082-48060582->BX465834.1	Act	0.308083	0.472021	0
sox13	M00070_2.00	chr5:48060082-48060582	BX465834.1	0.177426	Inter	0.671532	sox13->chr5:48060082-48060582->BX465834.1	Act	0.295973	0.472021	0
tcf7l1b	M02646_2.00	chr5:48060082-48060582	BX465834.1	0.0769694	Inter	0.479658	tcf7l1b->chr5:48060082-48060582->BX465834.1	Act	0.390873	0.472021	0
tcf7l2	M02646_2.00	chr5:48060082-48060582	BX465834.1	0.148628	Inter	0.602669	tcf7l2->chr5:48060082-48060582->BX465834.1	Act	0.32183	0.472021	0
nr2e1	M08220_2.00	chr5:48060082-48060582	BX465834.1	0.0537304	Inter	0.463114	nr2e1->chr5:48060082-48060582->BX465834.1	Act	0.345467	0.472021	0
sox13	M00070_2.00	chr5:48060589-48061089	BX465834.1	0.177426	Inter	0.671532	sox13->chr5:48060589-48061089->BX465834.1	Act	0.295973	0.472021	0
tcf7l1b	M02646_2.00	chr5:48060589-48061089	BX465834.1	0.0769694	Inter	0.479658	tcf7l1b->chr5:48060589-48061089->BX465834.1	Act	0.390873	0.472021	0
tcf7l2	M02646_2.00	chr5:48060589-48061089	BX465834.1	0.148628	Inter	0.602669	tcf7l2->chr5:48060589-48061089->BX465834.1	Act	0.32183	0.472021	0
nr2e1	M08220_2.00	chr5:48060589-48061089	BX465834.1	0.0537304	Inter	0.463114	nr2e1->chr5:48060589-48061089->BX465834.1	Act	0.345467	0.472021	0
ar	M00962	chr5:48083916-48084416	BX465834.1	0.28152	Inter	0.608362	ar->chr5:48083916-48084416->BX465834.1	Act	0.456809	0.472021	0
lhx2b	M07047	chr5:48083916-48084416	BX465834.1	0.193645	Inter	0.590579	lhx2b->chr5:48083916-48084416->BX465834.1	Act	0.275906	0.472021	0
rorb	M08966	chr5:48083916-48084416	BX465834.1	0.562027	Inter	0.46668	rorb->chr5:48083916-48084416->BX465834.1	Act	0.518637	0.472021	0
vezf1a	M10107	chr5:48083916-48084416	BX465834.1	0.377438	Inter	0.0861001	vezf1a->chr5:48083916-48084416->BX465834.1	Act	0.393767	0.472021	0
fosl2	M10237	chr5:48083916-48084416	BX465834.1	0.582792	Inter	0.279158	fosl2->chr5:48083916-48084416->BX465834.1	Act	0.273506	0.472021	0
rarab	M00820_2.00	chr5:48083916-48084416	BX465834.1	0.179555	Inter	0.553382	rarab->chr5:48083916-48084416->BX465834.1	Act	0.271116	0.472021	0
sox13	M09388_2.00	chr5:48083916-48084416	BX465834.1	0.582094	Inter	0.671532	sox13->chr5:48083916-48084416->BX465834.1	Act	0.295973	0.472021	0
tcf7l1b	M09392_2.00	chr5:48083916-48084416	BX465834.1	0.429509	Inter	0.479658	tcf7l1b->chr5:48083916-48084416->BX465834.1	Act	0.390873	0.472021	0
tcf7l2	M09392_2.00	chr5:48083916-48084416	BX465834.1	0.465533	Inter	0.602669	tcf7l2->chr5:48083916-48084416->BX465834.1	Act	0.32183	0.472021	0
sox13	M01014	chr5:48088088-48088588	BX465834.1	0.382335	Inter	0.671532	sox13->chr5:48088088-48088588->BX465834.1	Act	0.295973	0.472021	0
gli2a	M08875_2.00	chr5:48088088-48088588	BX465834.1	0.114009	Inter	0.778099	gli2a->chr5:48088088-48088588->BX465834.1	Act	0.398694	0.472021	0
tcf7l1b	M09392_2.00	chr5:48088088-48088588	BX465834.1	0.429509	Inter	0.479658	tcf7l1b->chr5:48088088-48088588->BX465834.1	Act	0.390873	0.472021	0
tcf7l2	M09392_2.00	chr5:48088088-48088588	BX465834.1	0.465533	Inter	0.602669	tcf7l2->chr5:48088088-48088588->BX465834.1	Act	0.32183	0.472021	0
fosl2	M00924	chr5:48090228-48090728	BX465834.1	0.565179	Inter	0.279158	fosl2->chr5:48090228-48090728->BX465834.1	Act	0.273506	0.472021	0
ar	M08189	chr5:48090228-48090728	BX465834.1	0.387419	Inter	0.608362	ar->chr5:48090228-48090728->BX465834.1	Act	0.456809	0.472021	0
nr3c2	M07987_2.00	chr5:48090228-48090728	BX465834.1	0.267585	Inter	0.541636	nr3c2->chr5:48090228-48090728->BX465834.1	Act	0.390207	0.472021	0
rarab	M09313_2.00	chr5:48090228-48090728	BX465834.1	0.268222	Inter	0.553382	rarab->chr5:48090228-48090728->BX465834.1	Act	0.271116	0.472021	0
rorb	M09313_2.00	chr5:48090228-48090728	BX465834.1	0.573618	Inter	0.46668	rorb->chr5:48090228-48090728->BX465834.1	Act	0.518637	0.472021	0
lhx2b	M10715_2.00	chr5:48090228-48090728	BX465834.1	0.179963	Inter	0.590579	lhx2b->chr5:48090228-48090728->BX465834.1	Act	0.275906	0.472021	0
ar	M00962	chr5:48100618-48101118	BX465834.1	0.28152	Inter	0.608362	ar->chr5:48100618-48101118->BX465834.1	Act	0.456809	0.472021	2.32442
plagl2	M05510	chr5:48100618-48101118	BX465834.1	0.139461	Inter	0.558546	plagl2->chr5:48100618-48101118->BX465834.1	Act	0.329948	0.472021	2.32442
vezf1a	M10107	chr5:48100618-48101118	BX465834.1	0.377438	Inter	0.0861001	vezf1a->chr5:48100618-48101118->BX465834.1	Act	0.393767	0.472021	2.32442
rorb	M05622_2.00	chr5:48100618-48101118	BX465834.1	0.188691	Inter	0.46668	rorb->chr5:48100618-48101118->BX465834.1	Act	0.518637	0.472021	2.32442
sox13	M09387_2.00	chr5:48100618-48101118	BX465834.1	0.605686	Inter	0.671532	sox13->chr5:48100618-48101118->BX465834.1	Act	0.295973	0.472021	2.32442
tead1a	M09434_2.00	chr5:48100618-48101118	BX465834.1	0.302181	Inter	0.464106	tead1a->chr5:48100618-48101118->BX465834.1	Act	0.371967	0.472021	2.32442
lhx2b	M06500_2.00	chr5:48110154-48110654	BX465834.1	0.395248	Inter	0.590579	lhx2b->chr5:48110154-48110654->BX465834.1	Act	0.275906	0.472021	0
ar	M08189	chr5:48123543-48124043	BX465834.1	0.387419	Inter	0.608362	ar->chr5:48123543-48124043->BX465834.1	Act	0.456809	0.472021	0
nr3c2	M02395_2.00	chr5:48123543-48124043	BX465834.1	0.0906981	Inter	0.541636	nr3c2->chr5:48123543-48124043->BX465834.1	Act	0.390207	0.472021	0
sox13	M03483_2.00	chr5:48123543-48124043	BX465834.1	0.0999395	Inter	0.671532	sox13->chr5:48123543-48124043->BX465834.1	Act	0.295973	0.472021	0
tcf7l1b	M09638_2.00	chr5:48123543-48124043	BX465834.1	0.132582	Inter	0.479658	tcf7l1b->chr5:48123543-48124043->BX465834.1	Act	0.390873	0.472021	0
tcf7l2	M09638_2.00	chr5:48123543-48124043	BX465834.1	0.215026	Inter	0.602669	tcf7l2->chr5:48123543-48124043->BX465834.1	Act	0.32183	0.472021	0
sox13	M03483_2.00	chr5:48124136-48124636	BX465834.1	0.0999395	Inter	0.671532	sox13->chr5:48124136-48124636->BX465834.1	Act	0.295973	0.472021	0
rorb	M03926_2.00	chr5:48124136-48124636	BX465834.1	0.10903	Inter	0.46668	rorb->chr5:48124136-48124636->BX465834.1	Act	0.518637	0.472021	0
rarab	M06427_2.00	chr5:48124136-48124636	BX465834.1	0.0577549	Inter	0.553382	rarab->chr5:48124136-48124636->BX465834.1	Act	0.271116	0.472021	0
fosl2	M00924	chr5:48130418-48130918	BX465834.1	0.565179	Inter	0.279158	fosl2->chr5:48130418-48130918->BX465834.1	Act	0.273506	0.472021	0
sox13	M03507_2.00	chr5:48130418-48130918	BX465834.1	0.113476	Inter	0.671532	sox13->chr5:48130418-48130918->BX465834.1	Act	0.295973	0.472021	0
rarab	M09282_2.00	chr5:48130418-48130918	BX465834.1	0.315678	Inter	0.553382	rarab->chr5:48130418-48130918->BX465834.1	Act	0.271116	0.472021	0
rorb	M09282_2.00	chr5:48130418-48130918	BX465834.1	0.624927	Inter	0.46668	rorb->chr5:48130418-48130918->BX465834.1	Act	0.518637	0.472021	0
tcf7l1b	M09638_2.00	chr5:48130418-48130918	BX465834.1	0.132582	Inter	0.479658	tcf7l1b->chr5:48130418-48130918->BX465834.1	Act	0.390873	0.472021	0
tcf7l2	M09638_2.00	chr5:48130418-48130918	BX465834.1	0.215026	Inter	0.602669	tcf7l2->chr5:48130418-48130918->BX465834.1	Act	0.32183	0.472021	0
rorb	M08966	chr5:48133177-48133677	BX465834.1	0.562027	Inter	0.46668	rorb->chr5:48133177-48133677->BX465834.1	Act	0.518637	0.472021	0
sox13	M02719_2.00	chr5:48133177-48133677	BX465834.1	0.478973	Inter	0.671532	sox13->chr5:48133177-48133677->BX465834.1	Act	0.295973	0.472021	0
rarab	M03928_2.00	chr5:48133177-48133677	BX465834.1	0.317114	Inter	0.553382	rarab->chr5:48133177-48133677->BX465834.1	Act	0.271116	0.472021	0
nr2e1	M06424_2.00	chr5:48133177-48133677	BX465834.1	0.218526	Inter	0.463114	nr2e1->chr5:48133177-48133677->BX465834.1	Act	0.345467	0.472021	0
mef2aa	M00231	chr5:48137158-48137658	BX465834.1	0.0566688	Inter	0.28222	mef2aa->chr5:48137158-48137658->BX465834.1	Act	0.308083	0.472021	0
gli2a	M03902	chr5:48137158-48137658	BX465834.1	0.339781	Inter	0.778099	gli2a->chr5:48137158-48137658->BX465834.1	Act	0.398694	0.472021	0
fosl2	M09616	chr5:48137158-48137658	BX465834.1	0.578578	Inter	0.279158	fosl2->chr5:48137158-48137658->BX465834.1	Act	0.273506	0.472021	0
lhx2b	M05219_2.00	chr5:48137158-48137658	BX465834.1	0.148922	Inter	0.590579	lhx2b->chr5:48137158-48137658->BX465834.1	Act	0.275906	0.472021	0
rarab	M09313_2.00	chr5:48137158-48137658	BX465834.1	0.268222	Inter	0.553382	rarab->chr5:48137158-48137658->BX465834.1	Act	0.271116	0.472021	0
rorb	M09313_2.00	chr5:48137158-48137658	BX465834.1	0.573618	Inter	0.46668	rorb->chr5:48137158-48137658->BX465834.1	Act	0.518637	0.472021	0
gli2a	M03902	chr5:48137688-48138188	BX465834.1	0.339781	Inter	0.778099	gli2a->chr5:48137688-48138188->BX465834.1	Act	0.398694	0.472021	0
rorb	M00184_2.00	chr5:48137688-48138188	BX465834.1	0.0869793	Inter	0.46668	rorb->chr5:48137688-48138188->BX465834.1	Act	0.518637	0.472021	0
nr2e1	M02394_2.00	chr5:48137688-48138188	BX465834.1	0.0654136	Inter	0.463114	nr2e1->chr5:48137688-48138188->BX465834.1	Act	0.345467	0.472021	0
rarab	M07994_2.00	chr5:48137688-48138188	BX465834.1	0.087667	Inter	0.553382	rarab->chr5:48137688-48138188->BX465834.1	Act	0.271116	0.472021	0
rorb	M03375_2.00	chr5:48140483-48140983	BX465834.1	0.0683586	Inter	0.46668	rorb->chr5:48140483-48140983->BX465834.1	Act	0.518637	0.472021	0
sox13	M03523_2.00	chr5:48140483-48140983	BX465834.1	0.0800693	Inter	0.671532	sox13->chr5:48140483-48140983->BX465834.1	Act	0.295973	0.472021	0
nr2e1	M05578_2.00	chr5:48140483-48140983	BX465834.1	0.121139	Inter	0.463114	nr2e1->chr5:48140483-48140983->BX465834.1	Act	0.345467	0.472021	0
rarab	M09263_2.00	chr5:48140483-48140983	BX465834.1	0.115508	Inter	0.553382	rarab->chr5:48140483-48140983->BX465834.1	Act	0.271116	0.472021	0
sox13	M01014	chr5:48145228-48145728	BX465834.1	0.382335	Inter	0.671532	sox13->chr5:48145228-48145728->BX465834.1	Act	0.295973	0.472021	0
lhx2b	M07047	chr5:48145228-48145728	BX465834.1	0.193645	Inter	0.590579	lhx2b->chr5:48145228-48145728->BX465834.1	Act	0.275906	0.472021	0
ar	M08189	chr5:48145228-48145728	BX465834.1	0.387419	Inter	0.608362	ar->chr5:48145228-48145728->BX465834.1	Act	0.456809	0.472021	0
tead1a	M03575_2.00	chr5:48145228-48145728	BX465834.1	0.157322	Inter	0.464106	tead1a->chr5:48145228-48145728->BX465834.1	Act	0.371967	0.472021	0
fosl2	M04273_2.00	chr5:48145228-48145728	BX465834.1	0.108427	Inter	0.279158	fosl2->chr5:48145228-48145728->BX465834.1	Act	0.273506	0.472021	0
tcf7l1b	M05755_2.00	chr5:48145228-48145728	BX465834.1	0.204681	Inter	0.479658	tcf7l1b->chr5:48145228-48145728->BX465834.1	Act	0.390873	0.472021	0
tcf7l2	M05755_2.00	chr5:48145228-48145728	BX465834.1	0.2985	Inter	0.602669	tcf7l2->chr5:48145228-48145728->BX465834.1	Act	0.32183	0.472021	0
nr2e1	M08220_2.00	chr5:48145228-48145728	BX465834.1	0.0537304	Inter	0.463114	nr2e1->chr5:48145228-48145728->BX465834.1	Act	0.345467	0.472021	0
mef2aa	M09599_2.00	chr5:48145228-48145728	BX465834.1	0.0833192	Inter	0.28222	mef2aa->chr5:48145228-48145728->BX465834.1	Act	0.308083	0.472021	0
sox13	M03487_2.00	chr5:48147191-48147691	BX465834.1	0.14668	Inter	0.671532	sox13->chr5:48147191-48147691->BX465834.1	Act	0.295973	0.472021	0
lhx2b	M07047	chr5:48151925-48152425	BX465834.1	0.193645	Inter	0.590579	lhx2b->chr5:48151925-48152425->BX465834.1	Act	0.275906	0.472021	0
sox13	M03502_2.00	chr5:48151925-48152425	BX465834.1	0.153313	Inter	0.671532	sox13->chr5:48151925-48152425->BX465834.1	Act	0.295973	0.472021	0
tead1a	M03576_2.00	chr5:48151925-48152425	BX465834.1	0.355605	Inter	0.464106	tead1a->chr5:48151925-48152425->BX465834.1	Act	0.371967	0.472021	0
tcf7l1b	M05755_2.00	chr5:48151925-48152425	BX465834.1	0.204681	Inter	0.479658	tcf7l1b->chr5:48151925-48152425->BX465834.1	Act	0.390873	0.472021	0
tcf7l2	M05755_2.00	chr5:48151925-48152425	BX465834.1	0.2985	Inter	0.602669	tcf7l2->chr5:48151925-48152425->BX465834.1	Act	0.32183	0.472021	0
nr2e1	M08220_2.00	chr5:48151925-48152425	BX465834.1	0.0537304	Inter	0.463114	nr2e1->chr5:48151925-48152425->BX465834.1	Act	0.345467	0.472021	0
ar	M09863	chr5:48157063-48157563	BX465834.1	0.149743	Inter	0.608362	ar->chr5:48157063-48157563->BX465834.1	Act	0.456809	0.472021	0
nr2e1	M06431_2.00	chr5:48157063-48157563	BX465834.1	0.0750346	Inter	0.463114	nr2e1->chr5:48157063-48157563->BX465834.1	Act	0.345467	0.472021	0
nr3c2	M09288_2.00	chr5:48157063-48157563	BX465834.1	0.248185	Inter	0.541636	nr3c2->chr5:48157063-48157563->BX465834.1	Act	0.390207	0.472021	0
rarab	M09317_2.00	chr5:48157063-48157563	BX465834.1	0.081656	Inter	0.553382	rarab->chr5:48157063-48157563->BX465834.1	Act	0.271116	0.472021	0
rorb	M09317_2.00	chr5:48157063-48157563	BX465834.1	0.202375	Inter	0.46668	rorb->chr5:48157063-48157563->BX465834.1	Act	0.518637	0.472021	0
sox13	M11342_2.00	chr5:48157063-48157563	BX465834.1	0.323268	Inter	0.671532	sox13->chr5:48157063-48157563->BX465834.1	Act	0.295973	0.472021	0
vezf1a	M10107	chr5:48160189-48160689	BX465834.1	0.377438	Inter	0.0861001	vezf1a->chr5:48160189-48160689->BX465834.1	Act	0.393767	0.472021	0
sox13	M00213_2.00	chr5:48160189-48160689	BX465834.1	0.444439	Inter	0.671532	sox13->chr5:48160189-48160689->BX465834.1	Act	0.295973	0.472021	0
tcf7l1b	M00712_2.00	chr5:48160189-48160689	BX465834.1	0.313419	Inter	0.479658	tcf7l1b->chr5:48160189-48160689->BX465834.1	Act	0.390873	0.472021	0
tcf7l2	M00712_2.00	chr5:48160189-48160689	BX465834.1	0.358468	Inter	0.602669	tcf7l2->chr5:48160189-48160689->BX465834.1	Act	0.32183	0.472021	0
nr2e1	M08220_2.00	chr5:48160189-48160689	BX465834.1	0.0537304	Inter	0.463114	nr2e1->chr5:48160189-48160689->BX465834.1	Act	0.345467	0.472021	0
klf12b	M08857_2.00	chr5:48160189-48160689	BX465834.1	0.0584093	Inter	0.500477	klf12b->chr5:48160189-48160689->BX465834.1	Act	0.342959	0.472021	0
lhx2b	M04385	chr5:48162501-48163001	BX465834.1	0.172889	Inter	0.590579	lhx2b->chr5:48162501-48163001->BX465834.1	Act	0.275906	0.472021	0
gli2a	M07292	chr5:48162501-48163001	BX465834.1	0.122262	Inter	0.778099	gli2a->chr5:48162501-48163001->BX465834.1	Act	0.398694	0.472021	0
ar	M08907	chr5:48162501-48163001	BX465834.1	0.225961	Inter	0.608362	ar->chr5:48162501-48163001->BX465834.1	Act	0.456809	0.472021	0
vezf1a	M10107	chr5:48162501-48163001	BX465834.1	0.377438	Inter	0.0861001	vezf1a->chr5:48162501-48163001->BX465834.1	Act	0.393767	0.472021	0
rorb	M00818_2.00	chr5:48162501-48163001	BX465834.1	0.112632	Inter	0.46668	rorb->chr5:48162501-48163001->BX465834.1	Act	0.518637	0.472021	0
nr3c2	M07986_2.00	chr5:48162501-48163001	BX465834.1	0.279897	Inter	0.541636	nr3c2->chr5:48162501-48163001->BX465834.1	Act	0.390207	0.472021	0
rarab	M08223_2.00	chr5:48162501-48163001	BX465834.1	0.0993908	Inter	0.553382	rarab->chr5:48162501-48163001->BX465834.1	Act	0.271116	0.472021	0
klf12b	M08857_2.00	chr5:48162501-48163001	BX465834.1	0.0584093	Inter	0.500477	klf12b->chr5:48162501-48163001->BX465834.1	Act	0.342959	0.472021	0
sox13	M09388_2.00	chr5:48162501-48163001	BX465834.1	0.582094	Inter	0.671532	sox13->chr5:48162501-48163001->BX465834.1	Act	0.295973	0.472021	0
tead1a	M09435_2.00	chr5:48162501-48163001	BX465834.1	0.270561	Inter	0.464106	tead1a->chr5:48162501-48163001->BX465834.1	Act	0.371967	0.472021	0
lhx2b	M04385	chr5:48163067-48163567	BX465834.1	0.172889	Inter	0.590579	lhx2b->chr5:48163067-48163567->BX465834.1	Act	0.275906	0.472021	0
gli2a	M07292	chr5:48163067-48163567	BX465834.1	0.122262	Inter	0.778099	gli2a->chr5:48163067-48163567->BX465834.1	Act	0.398694	0.472021	0
ar	M08189	chr5:48163067-48163567	BX465834.1	0.387419	Inter	0.608362	ar->chr5:48163067-48163567->BX465834.1	Act	0.456809	0.472021	0
vezf1a	M10107	chr5:48163067-48163567	BX465834.1	0.377438	Inter	0.0861001	vezf1a->chr5:48163067-48163567->BX465834.1	Act	0.393767	0.472021	0
fosl2	M04333_2.00	chr5:48163067-48163567	BX465834.1	0.563045	Inter	0.279158	fosl2->chr5:48163067-48163567->BX465834.1	Act	0.273506	0.472021	0
nr3c2	M07986_2.00	chr5:48163067-48163567	BX465834.1	0.279897	Inter	0.541636	nr3c2->chr5:48163067-48163567->BX465834.1	Act	0.390207	0.472021	0
klf12b	M08857_2.00	chr5:48163067-48163567	BX465834.1	0.0584093	Inter	0.500477	klf12b->chr5:48163067-48163567->BX465834.1	Act	0.342959	0.472021	0
tcf7l1b	M09638_2.00	chr5:48163067-48163567	BX465834.1	0.132582	Inter	0.479658	tcf7l1b->chr5:48163067-48163567->BX465834.1	Act	0.390873	0.472021	0
tcf7l2	M09638_2.00	chr5:48163067-48163567	BX465834.1	0.215026	Inter	0.602669	tcf7l2->chr5:48163067-48163567->BX465834.1	Act	0.32183	0.472021	0
ar	M00962	chr5:48169201-48169701	BX465834.1	0.28152	Inter	0.608362	ar->chr5:48169201-48169701->BX465834.1	Act	0.456809	0.472021	0
lhx2b	M07047	chr5:48169201-48169701	BX465834.1	0.193645	Inter	0.590579	lhx2b->chr5:48169201-48169701->BX465834.1	Act	0.275906	0.472021	0
fosl2	M08932	chr5:48169201-48169701	BX465834.1	0.0856818	Inter	0.279158	fosl2->chr5:48169201-48169701->BX465834.1	Act	0.273506	0.472021	0
rarab	M02706_2.00	chr5:48169201-48169701	BX465834.1	0.315051	Inter	0.553382	rarab->chr5:48169201-48169701->BX465834.1	Act	0.271116	0.472021	0
rorb	M02706_2.00	chr5:48169201-48169701	BX465834.1	0.535528	Inter	0.46668	rorb->chr5:48169201-48169701->BX465834.1	Act	0.518637	0.472021	0
sox13	M02719_2.00	chr5:48169201-48169701	BX465834.1	0.478973	Inter	0.671532	sox13->chr5:48169201-48169701->BX465834.1	Act	0.295973	0.472021	0
nr2e1	M03937_2.00	chr5:48169201-48169701	BX465834.1	0.13424	Inter	0.463114	nr2e1->chr5:48169201-48169701->BX465834.1	Act	0.345467	0.472021	0
nr3c2	M09288_2.00	chr5:48169201-48169701	BX465834.1	0.248185	Inter	0.541636	nr3c2->chr5:48169201-48169701->BX465834.1	Act	0.390207	0.472021	0
ar	M00962	chr5:48169851-48170351	BX465834.1	0.28152	Inter	0.608362	ar->chr5:48169851-48170351->BX465834.1	Act	0.456809	0.472021	0
lhx2b	M07047	chr5:48169851-48170351	BX465834.1	0.193645	Inter	0.590579	lhx2b->chr5:48169851-48170351->BX465834.1	Act	0.275906	0.472021	0
sox13	M00070_2.00	chr5:48169851-48170351	BX465834.1	0.177426	Inter	0.671532	sox13->chr5:48169851-48170351->BX465834.1	Act	0.295973	0.472021	0
rarab	M03392_2.00	chr5:48169851-48170351	BX465834.1	0.0568546	Inter	0.553382	rarab->chr5:48169851-48170351->BX465834.1	Act	0.271116	0.472021	0
nr3c2	M09288_2.00	chr5:48169851-48170351	BX465834.1	0.248185	Inter	0.541636	nr3c2->chr5:48169851-48170351->BX465834.1	Act	0.390207	0.472021	0
tcf7l1b	M04005	chr5:48170615-48171115	BX465834.1	0.158168	Inter	0.479658	tcf7l1b->chr5:48170615-48171115->BX465834.1	Act	0.390873	0.472021	0.648982
tcf7l2	M07136	chr5:48170615-48171115	BX465834.1	0.232667	Inter	0.602669	tcf7l2->chr5:48170615-48171115->BX465834.1	Act	0.32183	0.472021	0.648982
gli2a	M07292	chr5:48170615-48171115	BX465834.1	0.122262	Inter	0.778099	gli2a->chr5:48170615-48171115->BX465834.1	Act	0.398694	0.472021	0.648982
fosl2	M08924	chr5:48170615-48171115	BX465834.1	0.0506572	Inter	0.279158	fosl2->chr5:48170615-48171115->BX465834.1	Act	0.273506	0.472021	0.648982
rorb	M00184_2.00	chr5:48170615-48171115	BX465834.1	0.0869793	Inter	0.46668	rorb->chr5:48170615-48171115->BX465834.1	Act	0.518637	0.472021	0.648982
nr2e1	M03358_2.00	chr5:48170615-48171115	BX465834.1	0.0836499	Inter	0.463114	nr2e1->chr5:48170615-48171115->BX465834.1	Act	0.345467	0.472021	0.648982
rarab	M03392_2.00	chr5:48170615-48171115	BX465834.1	0.0568546	Inter	0.553382	rarab->chr5:48170615-48171115->BX465834.1	Act	0.271116	0.472021	0.648982
sox13	M03490_2.00	chr5:48170615-48171115	BX465834.1	0.0903419	Inter	0.671532	sox13->chr5:48170615-48171115->BX465834.1	Act	0.295973	0.472021	0.648982
lhx2b	M03805_2.00	chr5:48170615-48171115	BX465834.1	0.127223	Inter	0.590579	lhx2b->chr5:48170615-48171115->BX465834.1	Act	0.275906	0.472021	0.648982
mef2aa	M00026	chr5:48171190-48171690	BX465834.1	0.0621812	Inter	0.28222	mef2aa->chr5:48171190-48171690->BX465834.1	Act	0.308083	0.472021	0
nr3c2	M04477	chr5:48171190-48171690	BX465834.1	0.28069	Inter	0.541636	nr3c2->chr5:48171190-48171690->BX465834.1	Act	0.390207	0.472021	0
tcf7l2	M07136	chr5:48171190-48171690	BX465834.1	0.232667	Inter	0.602669	tcf7l2->chr5:48171190-48171690->BX465834.1	Act	0.32183	0.472021	0
ar	M09589	chr5:48171190-48171690	BX465834.1	0.273931	Inter	0.608362	ar->chr5:48171190-48171690->BX465834.1	Act	0.456809	0.472021	0
tcf7l1b	M10095	chr5:48171190-48171690	BX465834.1	0.13653	Inter	0.479658	tcf7l1b->chr5:48171190-48171690->BX465834.1	Act	0.390873	0.472021	0
vezf1a	M10107	chr5:48171190-48171690	BX465834.1	0.377438	Inter	0.0861001	vezf1a->chr5:48171190-48171690->BX465834.1	Act	0.393767	0.472021	0
rarab	M03392_2.00	chr5:48171190-48171690	BX465834.1	0.0568546	Inter	0.553382	rarab->chr5:48171190-48171690->BX465834.1	Act	0.271116	0.472021	0
lhx2b	M03814_2.00	chr5:48171190-48171690	BX465834.1	0.0743495	Inter	0.590579	lhx2b->chr5:48171190-48171690->BX465834.1	Act	0.275906	0.472021	0
sox13	M09787	chr5:48171942-48172442	BX465834.1	0.540612	Inter	0.671532	sox13->chr5:48171942-48172442->BX465834.1	Act	0.295973	0.472021	0
ar	M02395_2.00	chr5:48171942-48172442	BX465834.1	0.0987708	Inter	0.608362	ar->chr5:48171942-48172442->BX465834.1	Act	0.456809	0.472021	0
nr3c2	M02395_2.00	chr5:48171942-48172442	BX465834.1	0.0906981	Inter	0.541636	nr3c2->chr5:48171942-48172442->BX465834.1	Act	0.390207	0.472021	0
rorb	M05591_2.00	chr5:48171942-48172442	BX465834.1	0.0526257	Inter	0.46668	rorb->chr5:48171942-48172442->BX465834.1	Act	0.518637	0.472021	0
mef2aa	M07979_2.00	chr5:48171942-48172442	BX465834.1	0.0643094	Inter	0.28222	mef2aa->chr5:48171942-48172442->BX465834.1	Act	0.308083	0.472021	0
rarab	M09273_2.00	chr5:48171942-48172442	BX465834.1	0.144277	Inter	0.553382	rarab->chr5:48171942-48172442->BX465834.1	Act	0.271116	0.472021	0
sox13	M00208_2.00	chr5:48175437-48175937	BX465834.1	0.146741	Inter	0.671532	sox13->chr5:48175437-48175937->BX465834.1	Act	0.295973	0.472021	0.859281
lhx2b	M03181_2.00	chr5:48175437-48175937	BX465834.1	0.122299	Inter	0.590579	lhx2b->chr5:48175437-48175937->BX465834.1	Act	0.275906	0.472021	0.859281
ar	M08189	chr5:48178842-48179342	BX465834.1	0.387419	Inter	0.608362	ar->chr5:48178842-48179342->BX465834.1	Act	0.456809	0.472021	0
lhx2b	M06230_2.00	chr5:48178842-48179342	BX465834.1	0.191007	Inter	0.590579	lhx2b->chr5:48178842-48179342->BX465834.1	Act	0.275906	0.472021	0
nr3c2	M09288_2.00	chr5:48178842-48179342	BX465834.1	0.248185	Inter	0.541636	nr3c2->chr5:48178842-48179342->BX465834.1	Act	0.390207	0.472021	0
rfx2	M04095	chr13:10198063-10198563	BX537274.1	0.361508	Inter	0.35745	rfx2->chr13:10198063-10198563->BX537274.1	Act	0.396514	0.349984	0
lhx2b	M00288_2.00	chr13:10198063-10198563	BX537274.1	0.0788753	Inter	0.36087	lhx2b->chr13:10198063-10198563->BX537274.1	Act	0.275906	0.349984	0
rorb	M06427_2.00	chr13:10198063-10198563	BX537274.1	0.181697	Inter	0.379714	rorb->chr13:10198063-10198563->BX537274.1	Act	0.518637	0.349984	0
lhx2b	M04386	chr13:10229969-10230469	BX537274.1	0.0522425	Inter	0.36087	lhx2b->chr13:10229969-10230469->BX537274.1	Act	0.275906	0.349984	0
nr2e1	M08220_2.00	chr13:10229969-10230469	BX537274.1	0.0537304	Inter	0.36127	nr2e1->chr13:10229969-10230469->BX537274.1	Act	0.345467	0.349984	0
rorb	M05651_2.00	chr13:10242433-10242933	BX537274.1	0.0515124	Inter	0.379714	rorb->chr13:10242433-10242933->BX537274.1	Act	0.518637	0.349984	0
foxo1a	M03823	chr13:10254476-10254976	BX537274.1	0.456812	Inter	0.442324	foxo1a->chr13:10254476-10254976->BX537274.1	Act	0.378908	0.349984	0
foxn4	M04645	chr13:10254476-10254976	BX537274.1	0.102056	Inter	0.354781	foxn4->chr13:10254476-10254976->BX537274.1	Act	0.40659	0.349984	0
lhx2b	M03190_2.00	chr13:10254476-10254976	BX537274.1	0.276705	Inter	0.36087	lhx2b->chr13:10254476-10254976->BX537274.1	Act	0.275906	0.349984	0
sox13	M08899	chr13:10256149-10256649	BX537274.1	0.431399	Inter	0.50451	sox13->chr13:10256149-10256649->BX537274.1	Act	0.295973	0.349984	0
rorb	M08156_2.00	chr13:10256149-10256649	BX537274.1	0.104142	Inter	0.379714	rorb->chr13:10256149-10256649->BX537274.1	Act	0.518637	0.349984	0
lhx2b	M07047	chr13:10257495-10257995	BX537274.1	0.193645	Inter	0.36087	lhx2b->chr13:10257495-10257995->BX537274.1	Act	0.275906	0.349984	0
tcf7l1b	M05755_2.00	chr13:10257495-10257995	BX537274.1	0.204681	Inter	0.437007	tcf7l1b->chr13:10257495-10257995->BX537274.1	Act	0.390873	0.349984	0
tcf7l2	M05755_2.00	chr13:10257495-10257995	BX537274.1	0.2985	Inter	0.385353	tcf7l2->chr13:10257495-10257995->BX537274.1	Act	0.32183	0.349984	0
nr2e1	M08220_2.00	chr13:10257495-10257995	BX537274.1	0.0537304	Inter	0.36127	nr2e1->chr13:10257495-10257995->BX537274.1	Act	0.345467	0.349984	0
foxo1a	M03823	chr13:10262331-10262831	BX537274.1	0.456812	Inter	0.442324	foxo1a->chr13:10262331-10262831->BX537274.1	Act	0.378908	0.349984	0
nr2e1	M03361_2.00	chr13:10262331-10262831	BX537274.1	0.135799	Inter	0.36127	nr2e1->chr13:10262331-10262831->BX537274.1	Act	0.345467	0.349984	0
sox13	M03518_2.00	chr13:10262331-10262831	BX537274.1	0.124461	Inter	0.50451	sox13->chr13:10262331-10262831->BX537274.1	Act	0.295973	0.349984	0
tead1a	M03576_2.00	chr13:10262331-10262831	BX537274.1	0.355605	Inter	0.461736	tead1a->chr13:10262331-10262831->BX537274.1	Act	0.371967	0.349984	0
rfx2	M09365_2.00	chr13:10262331-10262831	BX537274.1	0.275392	Inter	0.35745	rfx2->chr13:10262331-10262831->BX537274.1	Act	0.396514	0.349984	0
gli2a	M01703	chr13:10264532-10265032	BX537274.1	0.15947	Inter	0.583101	gli2a->chr13:10264532-10265032->BX537274.1	Act	0.398694	0.349984	0
lhx2b	M07047	chr13:10264532-10265032	BX537274.1	0.193645	Inter	0.36087	lhx2b->chr13:10264532-10265032->BX537274.1	Act	0.275906	0.349984	0
rorb	M05880_2.00	chr13:10264532-10265032	BX537274.1	0.571141	Inter	0.379714	rorb->chr13:10264532-10265032->BX537274.1	Act	0.518637	0.349984	0
gli2a	M01037	chr13:10265724-10266224	BX537274.1	0.0839593	Inter	0.583101	gli2a->chr13:10265724-10266224->BX537274.1	Act	0.398694	0.349984	0
foxo1a	M03823	chr13:10265724-10266224	BX537274.1	0.456812	Inter	0.442324	foxo1a->chr13:10265724-10266224->BX537274.1	Act	0.378908	0.349984	0
lhx2b	M04386	chr13:10265724-10266224	BX537274.1	0.0522425	Inter	0.36087	lhx2b->chr13:10265724-10266224->BX537274.1	Act	0.275906	0.349984	0
sox13	M00203_2.00	chr13:10269447-10269947	BX537274.1	0.31565	Inter	0.50451	sox13->chr13:10269447-10269947->BX537274.1	Act	0.295973	0.349984	0
sox13	M03484_2.00	chr13:10271262-10271762	BX537274.1	0.154662	Inter	0.50451	sox13->chr13:10271262-10271762->BX537274.1	Act	0.295973	0.349984	0
rorb	M05639_2.00	chr13:10271262-10271762	BX537274.1	0.0919722	Inter	0.379714	rorb->chr13:10271262-10271762->BX537274.1	Act	0.518637	0.349984	0
tcf7l1b	M05773_2.00	chr13:10271262-10271762	BX537274.1	0.158896	Inter	0.437007	tcf7l1b->chr13:10271262-10271762->BX537274.1	Act	0.390873	0.349984	0
tcf7l2	M05773_2.00	chr13:10271262-10271762	BX537274.1	0.26902	Inter	0.385353	tcf7l2->chr13:10271262-10271762->BX537274.1	Act	0.32183	0.349984	0
foxo1a	M08481	chr13:10273663-10274163	BX537274.1	0.179844	Inter	0.442324	foxo1a->chr13:10273663-10274163->BX537274.1	Act	0.378908	0.349984	0
sox13	M09389_2.00	chr13:10273663-10274163	BX537274.1	0.62294	Inter	0.50451	sox13->chr13:10273663-10274163->BX537274.1	Act	0.295973	0.349984	0
rorb	M09294_2.00	chr13:10279284-10279784	BX537274.1	0.461076	Inter	0.379714	rorb->chr13:10279284-10279784->BX537274.1	Act	0.518637	0.349984	0
rorb	M09294_2.00	chr13:10279864-10280364	BX537274.1	0.461076	Inter	0.379714	rorb->chr13:10279864-10280364->BX537274.1	Act	0.518637	0.349984	0
smad1	M01590	chr13:10289650-10290150	BX537274.1	0.257073	Inter	0.2798	smad1->chr13:10289650-10290150->BX537274.1	Act	0.276836	0.349984	0
sox13	M03487_2.00	chr13:10289650-10290150	BX537274.1	0.14668	Inter	0.50451	sox13->chr13:10289650-10290150->BX537274.1	Act	0.295973	0.349984	0
lhx2b	M06500_2.00	chr13:10289650-10290150	BX537274.1	0.395248	Inter	0.36087	lhx2b->chr13:10289650-10290150->BX537274.1	Act	0.275906	0.349984	0
rorb	M09294_2.00	chr13:10289650-10290150	BX537274.1	0.461076	Inter	0.379714	rorb->chr13:10289650-10290150->BX537274.1	Act	0.518637	0.349984	0
gli2a	M01037	chr13:10298821-10299321	BX537274.1	0.0839593	Inter	0.583101	gli2a->chr13:10298821-10299321->BX537274.1	Act	0.398694	0.349984	0
tead1a	M04141	chr13:10298821-10299321	BX537274.1	0.321624	Inter	0.461736	tead1a->chr13:10298821-10299321->BX537274.1	Act	0.371967	0.349984	0
lhx2b	M09976	chr13:10298821-10299321	BX537274.1	0.127601	Inter	0.36087	lhx2b->chr13:10298821-10299321->BX537274.1	Act	0.275906	0.349984	0
rfx2	M02448_2.00	chr13:10298821-10299321	BX537274.1	0.347534	Inter	0.35745	rfx2->chr13:10298821-10299321->BX537274.1	Act	0.396514	0.349984	0
rorb	M03375_2.00	chr13:10298821-10299321	BX537274.1	0.0683586	Inter	0.379714	rorb->chr13:10298821-10299321->BX537274.1	Act	0.518637	0.349984	0
sox13	M03971_2.00	chr13:10298821-10299321	BX537274.1	0.133726	Inter	0.50451	sox13->chr13:10298821-10299321->BX537274.1	Act	0.295973	0.349984	0
nr2e1	M05573_2.00	chr13:10298821-10299321	BX537274.1	0.113606	Inter	0.36127	nr2e1->chr13:10298821-10299321->BX537274.1	Act	0.345467	0.349984	0
lhx2b	M07047	chr13:10311074-10311574	BX537274.1	0.193645	Inter	0.36087	lhx2b->chr13:10311074-10311574->BX537274.1	Act	0.275906	0.349984	0
tcf7l1b	M00198_2.00	chr13:10311074-10311574	BX537274.1	0.0840065	Inter	0.437007	tcf7l1b->chr13:10311074-10311574->BX537274.1	Act	0.390873	0.349984	0
tcf7l2	M00198_2.00	chr13:10311074-10311574	BX537274.1	0.154676	Inter	0.385353	tcf7l2->chr13:10311074-10311574->BX537274.1	Act	0.32183	0.349984	0
rorb	M00820_2.00	chr13:10311074-10311574	BX537274.1	0.344202	Inter	0.379714	rorb->chr13:10311074-10311574->BX537274.1	Act	0.518637	0.349984	0
sox13	M03487_2.00	chr13:10311074-10311574	BX537274.1	0.14668	Inter	0.50451	sox13->chr13:10311074-10311574->BX537274.1	Act	0.295973	0.349984	0
foxn3	M03746_2.00	chr13:10311074-10311574	BX537274.1	0.0858393	Inter	0.404947	foxn3->chr13:10311074-10311574->BX537274.1	Act	0.454143	0.349984	0
gli2a	M05331	chr13:10332175-10332675	BX537274.1	0.190092	Inter	0.583101	gli2a->chr13:10332175-10332675->BX537274.1	Act	0.398694	0.349984	0
sox13	M02719_2.00	chr13:10332175-10332675	BX537274.1	0.478973	Inter	0.50451	sox13->chr13:10332175-10332675->BX537274.1	Act	0.295973	0.349984	0
nr2e1	M06424_2.00	chr13:10332175-10332675	BX537274.1	0.218526	Inter	0.36127	nr2e1->chr13:10332175-10332675->BX537274.1	Act	0.345467	0.349984	0
rorb	M09286_2.00	chr13:10332175-10332675	BX537274.1	0.0550905	Inter	0.379714	rorb->chr13:10332175-10332675->BX537274.1	Act	0.518637	0.349984	0
tead1a	M09434_2.00	chr13:10332175-10332675	BX537274.1	0.302181	Inter	0.461736	tead1a->chr13:10332175-10332675->BX537274.1	Act	0.371967	0.349984	0
lhx2b	M03290_2.00	chr13:10333994-10334494	BX537274.1	0.0567035	Inter	0.36087	lhx2b->chr13:10333994-10334494->BX537274.1	Act	0.275906	0.349984	0.372918
sox13	M03514_2.00	chr13:10333994-10334494	BX537274.1	0.0850607	Inter	0.50451	sox13->chr13:10333994-10334494->BX537274.1	Act	0.295973	0.349984	0.372918
rorb	M09291_2.00	chr13:10333994-10334494	BX537274.1	0.276632	Inter	0.379714	rorb->chr13:10333994-10334494->BX537274.1	Act	0.518637	0.349984	0.372918
fosl2	M03870	chr3:41465827-41466327	BX537310.2	0.573182	Inter	0.166439	fosl2->chr3:41465827-41466327->BX537310.2	Act	0.273506	0.438059	0.982767
rxraa	M09284_2.00	chr3:41465827-41466327	BX537310.2	0.0627494	Inter	0.242779	rxraa->chr3:41465827-41466327->BX537310.2	Act	0.560488	0.438059	0.982767
vax2	M03814_2.00	chr3:41492644-41493144	BX537310.2	0.0527263	Inter	0.245127	vax2->chr3:41492644-41493144->BX537310.2	Act	0.459159	0.438059	0
gli2a	M01037	chr3:41510728-41511228	BX537310.2	0.0839593	Inter	0.353948	gli2a->chr3:41510728-41511228->BX537310.2	Act	0.398694	0.438059	0
vax2	M06218_2.00	chr3:41510728-41511228	BX537310.2	0.121858	Inter	0.245127	vax2->chr3:41510728-41511228->BX537310.2	Act	0.459159	0.438059	0
rorb	M08156_2.00	chr3:41511825-41512325	BX537310.2	0.104142	Inter	0.198003	rorb->chr3:41511825-41512325->BX537310.2	Act	0.518637	0.438059	1.7703
nr3c2	M02395_2.00	chr3:41521718-41522218	BX537310.2	0.0906981	Inter	0.310717	nr3c2->chr3:41521718-41522218->BX537310.2	Act	0.390207	0.438059	0
foxo1a	M03021_2.00	chr3:41521718-41522218	BX537310.2	0.321064	Inter	0.271604	foxo1a->chr3:41521718-41522218->BX537310.2	Act	0.378908	0.438059	0
e2f3	M00050	chr6:49322317-49322817	BX569793.1	0.171272	Inter	0.120334	e2f3->chr6:49322317-49322817->BX569793.1	Act	0.374128	0.467054	1.43675
sox13	M01014	chr6:49322317-49322817	BX569793.1	0.382335	Inter	0.151871	sox13->chr6:49322317-49322817->BX569793.1	Act	0.295973	0.467054	1.43675
tcf7l1a	M05890_2.00	chr6:49322317-49322817	BX569793.1	0.10441	Inter	0.187756	tcf7l1a->chr6:49322317-49322817->BX569793.1	Act	0.287814	0.467054	1.43675
tcf7l1b	M05890_2.00	chr6:49322317-49322817	BX569793.1	0.163048	Inter	0.166117	tcf7l1b->chr6:49322317-49322817->BX569793.1	Act	0.390873	0.467054	1.43675
tcf7l2	M05890_2.00	chr6:49322317-49322817	BX569793.1	0.261783	Inter	0.0817443	tcf7l2->chr6:49322317-49322817->BX569793.1	Act	0.32183	0.467054	1.43675
tfdp2	M08108_2.00	chr6:49322317-49322817	BX569793.1	0.0736701	Inter	0.103187	tfdp2->chr6:49322317-49322817->BX569793.1	Act	0.309458	0.467054	1.43675
sox13	M01014	chr6:49322832-49323332	BX569793.1	0.382335	Inter	0.151871	sox13->chr6:49322832-49323332->BX569793.1	Act	0.295973	0.467054	1.29292
tcf7l1a	M08902	chr6:49322832-49323332	BX569793.1	0.171958	Inter	0.187756	tcf7l1a->chr6:49322832-49323332->BX569793.1	Act	0.287814	0.467054	1.29292
tcf7l1b	M05890_2.00	chr6:49322832-49323332	BX569793.1	0.163048	Inter	0.166117	tcf7l1b->chr6:49322832-49323332->BX569793.1	Act	0.390873	0.467054	1.29292
tcf7l2	M05890_2.00	chr6:49322832-49323332	BX569793.1	0.261783	Inter	0.0817443	tcf7l2->chr6:49322832-49323332->BX569793.1	Act	0.32183	0.467054	1.29292
sox13	M00214_2.00	chr6:49427950-49428450	BX569793.1	0.102777	Inter	0.151871	sox13->chr6:49427950-49428450->BX569793.1	Act	0.295973	0.467054	0
rorb	M09282_2.00	chr6:49427950-49428450	BX569793.1	0.624927	Inter	0.143166	rorb->chr6:49427950-49428450->BX569793.1	Act	0.518637	0.467054	0
foxo1a	M03051_2.00	chr11:14355058-14355558	BX571942.1	0.0896813	Inter	0.233751	foxo1a->chr11:14355058-14355558->BX571942.1	Act	0.378908	0.325097	0
sox13	M05759_2.00	chr11:14355058-14355558	BX571942.1	0.445289	Inter	0.383295	sox13->chr11:14355058-14355558->BX571942.1	Act	0.295973	0.325097	0
nfixa	M00193	chr11:14391641-14392141	BX571942.1	0.281295	Inter	0.314065	nfixa->chr11:14391641-14392141->BX571942.1	Act	0.512419	0.325097	0
foxo1a	M00473	chr11:14391641-14392141	BX571942.1	0.225692	Inter	0.233751	foxo1a->chr11:14391641-14392141->BX571942.1	Act	0.378908	0.325097	0
sox13	M09787	chr11:14391641-14392141	BX571942.1	0.540612	Inter	0.383295	sox13->chr11:14391641-14392141->BX571942.1	Act	0.295973	0.325097	0
stat3	M10081	chr11:14391641-14392141	BX571942.1	0.353104	Inter	0.23721	stat3->chr11:14391641-14392141->BX571942.1	Act	0.327768	0.325097	0
rxraa	M04787	chr11:14423194-14423694	BX571942.1	0.0608	Inter	0.391063	rxraa->chr11:14423194-14423694->BX571942.1	Act	0.560488	0.325097	0
fosl2	M07092	chr11:14423194-14423694	BX571942.1	0.578819	Inter	0.12115	fosl2->chr11:14423194-14423694->BX571942.1	Act	0.273506	0.325097	0
tcf7l2	M05895_2.00	chr11:14423194-14423694	BX571942.1	0.0852363	Inter	0.230074	tcf7l2->chr11:14423194-14423694->BX571942.1	Act	0.32183	0.325097	0
rxraa	M00242	chr11:14431063-14431563	BX571942.1	0.18752	Inter	0.391063	rxraa->chr11:14431063-14431563->BX571942.1	Act	0.560488	0.325097	0
foxo1a	M03823	chr11:14431063-14431563	BX571942.1	0.456812	Inter	0.233751	foxo1a->chr11:14431063-14431563->BX571942.1	Act	0.378908	0.325097	0
gli2a	M03902	chr11:14431063-14431563	BX571942.1	0.339781	Inter	0.41244	gli2a->chr11:14431063-14431563->BX571942.1	Act	0.398694	0.325097	0
sox13	M08042_2.00	chr11:14431063-14431563	BX571942.1	0.210238	Inter	0.383295	sox13->chr11:14431063-14431563->BX571942.1	Act	0.295973	0.325097	0
rarab	M11183_2.00	chr11:14431063-14431563	BX571942.1	0.13507	Inter	0.312927	rarab->chr11:14431063-14431563->BX571942.1	Act	0.271116	0.325097	0
ar	M00962	chr11:14456428-14456928	BX571942.1	0.28152	Inter	0.308378	ar->chr11:14456428-14456928->BX571942.1	Act	0.456809	0.325097	0
nfixa	M04058	chr11:14527671-14528171	BX571942.1	0.385337	Inter	0.314065	nfixa->chr11:14527671-14528171->BX571942.1	Act	0.512419	0.325097	0
stat3	M10383	chr11:14527671-14528171	BX571942.1	0.309454	Inter	0.23721	stat3->chr11:14527671-14528171->BX571942.1	Act	0.327768	0.325097	0
sox13	M01026_2.00	chr11:14527671-14528171	BX571942.1	0.478959	Inter	0.383295	sox13->chr11:14527671-14528171->BX571942.1	Act	0.295973	0.325097	0
rxraa	M05642_2.00	chr11:14527671-14528171	BX571942.1	0.0547657	Inter	0.391063	rxraa->chr11:14527671-14528171->BX571942.1	Act	0.560488	0.325097	0
plagl2	M05510	chr11:14533875-14534375	BX571942.1	0.139461	Inter	0.32891	plagl2->chr11:14533875-14534375->BX571942.1	Act	0.329948	0.325097	0
rxraa	M02791	chr11:14539999-14540499	BX571942.1	0.0625688	Inter	0.391063	rxraa->chr11:14539999-14540499->BX571942.1	Act	0.560488	0.325097	0
nfixa	M04058	chr11:14565061-14565561	BX571942.1	0.385337	Inter	0.314065	nfixa->chr11:14565061-14565561->BX571942.1	Act	0.512419	0.325097	0
rxraa	M09280_2.00	chr11:14565061-14565561	BX571942.1	0.0774713	Inter	0.391063	rxraa->chr11:14565061-14565561->BX571942.1	Act	0.560488	0.325097	0
nfixa	M00056	chr11:14574975-14575475	BX571942.1	0.0745108	Inter	0.314065	nfixa->chr11:14574975-14575475->BX571942.1	Act	0.512419	0.325097	0
gli2a	M04403_2.00	chr11:14574975-14575475	BX571942.1	0.0521742	Inter	0.41244	gli2a->chr11:14574975-14575475->BX571942.1	Act	0.398694	0.325097	0
rxraa	M09619_2.00	chr11:14574975-14575475	BX571942.1	0.13258	Inter	0.391063	rxraa->chr11:14574975-14575475->BX571942.1	Act	0.560488	0.325097	0
tcf7l1a	M00805	chr23:27901834-27902334	BX663515.1	0.230037	Inter	0.190695	tcf7l1a->chr23:27901834-27902334->BX663515.1	Act	0.287814	0.26562	0
foxo1a	M03823	chr23:27901834-27902334	BX663515.1	0.456812	Inter	0.228726	foxo1a->chr23:27901834-27902334->BX663515.1	Act	0.378908	0.26562	0
rxraa	M07125	chr23:27901834-27902334	BX663515.1	0.17073	Inter	0.193574	rxraa->chr23:27901834-27902334->BX663515.1	Act	0.560488	0.26562	0
sox13	M01026_2.00	chr23:27901834-27902334	BX663515.1	0.478959	Inter	0.299621	sox13->chr23:27901834-27902334->BX663515.1	Act	0.295973	0.26562	0
tcf7l1a	M00805	chr23:27902349-27902849	BX663515.1	0.230037	Inter	0.190695	tcf7l1a->chr23:27902349-27902849->BX663515.1	Act	0.287814	0.26562	0
sox13	M01026_2.00	chr23:27902349-27902849	BX663515.1	0.478959	Inter	0.299621	sox13->chr23:27902349-27902849->BX663515.1	Act	0.295973	0.26562	0
rxraa	M03388_2.00	chr23:27902349-27902849	BX663515.1	0.0875782	Inter	0.193574	rxraa->chr23:27902349-27902849->BX663515.1	Act	0.560488	0.26562	0
rfx2	M00188_2.00	chr23:27905124-27905624	BX663515.1	0.0545399	Inter	0.208402	rfx2->chr23:27905124-27905624->BX663515.1	Act	0.396514	0.26562	0
gli2a	M01703	chr23:27906048-27906548	BX663515.1	0.15947	Inter	0.325113	gli2a->chr23:27906048-27906548->BX663515.1	Act	0.398694	0.26562	0
ar	M04453	chr23:27906048-27906548	BX663515.1	0.254816	Inter	0.16161	ar->chr23:27906048-27906548->BX663515.1	Act	0.456809	0.26562	0
tcf7l1a	M05757_2.00	chr23:27906048-27906548	BX663515.1	0.056126	Inter	0.190695	tcf7l1a->chr23:27906048-27906548->BX663515.1	Act	0.287814	0.26562	0
tcf7l1b	M05757_2.00	chr23:27906048-27906548	BX663515.1	0.114163	Inter	0.24996	tcf7l1b->chr23:27906048-27906548->BX663515.1	Act	0.390873	0.26562	0
tcf7l2	M05757_2.00	chr23:27906048-27906548	BX663515.1	0.227013	Inter	0.184155	tcf7l2->chr23:27906048-27906548->BX663515.1	Act	0.32183	0.26562	0
foxo1a	M03823	chr23:28018618-28019118	BX663515.1	0.456812	Inter	0.228726	foxo1a->chr23:28018618-28019118->BX663515.1	Act	0.378908	0.26562	0
rxraa	M04787	chr23:28018618-28019118	BX663515.1	0.0608	Inter	0.193574	rxraa->chr23:28018618-28019118->BX663515.1	Act	0.560488	0.26562	0
ar	M08189	chr23:28018618-28019118	BX663515.1	0.387419	Inter	0.16161	ar->chr23:28018618-28019118->BX663515.1	Act	0.456809	0.26562	0
sox13	M02719_2.00	chr23:28018618-28019118	BX663515.1	0.478973	Inter	0.299621	sox13->chr23:28018618-28019118->BX663515.1	Act	0.295973	0.26562	0
rorb	M00818_2.00	chr23:28139554-28140054	BX663515.1	0.112632	Inter	0.189993	rorb->chr23:28139554-28140054->BX663515.1	Act	0.518637	0.26562	0
rxraa	M00818_2.00	chr23:28139554-28140054	BX663515.1	0.10252	Inter	0.193574	rxraa->chr23:28139554-28140054->BX663515.1	Act	0.560488	0.26562	0
ar	M08189	chr23:28295514-28296014	BX663515.1	0.387419	Inter	0.16161	ar->chr23:28295514-28296014->BX663515.1	Act	0.456809	0.26562	0
tcf7l1a	M08902	chr23:28295514-28296014	BX663515.1	0.171958	Inter	0.190695	tcf7l1a->chr23:28295514-28296014->BX663515.1	Act	0.287814	0.26562	0
sox13	M01026_2.00	chr23:28295514-28296014	BX663515.1	0.478959	Inter	0.299621	sox13->chr23:28295514-28296014->BX663515.1	Act	0.295973	0.26562	0
erfl3	M06186_2.00	chr23:28295514-28296014	BX663515.1	0.0826477	Inter	0.209916	erfl3->chr23:28295514-28296014->BX663515.1	Act	0.412952	0.26562	0
rorb	M09612_2.00	chr23:28295514-28296014	BX663515.1	0.175628	Inter	0.189993	rorb->chr23:28295514-28296014->BX663515.1	Act	0.518637	0.26562	0
rxraa	M09612_2.00	chr23:28295514-28296014	BX663515.1	0.123626	Inter	0.193574	rxraa->chr23:28295514-28296014->BX663515.1	Act	0.560488	0.26562	0
ar	M08908	chr23:28304674-28305174	BX663515.1	0.18432	Inter	0.16161	ar->chr23:28304674-28305174->BX663515.1	Act	0.456809	0.26562	0
sox13	M08168_2.00	chr23:28304674-28305174	BX663515.1	0.58539	Inter	0.299621	sox13->chr23:28304674-28305174->BX663515.1	Act	0.295973	0.26562	0
foxo1a	M03823	chr6:45114426-45114926	BX942846.1	0.456812	Body	0.171002	foxo1a->chr6:45114426-45114926->BX942846.1	Act	0.378908	0.884475	0
sox13	M11331_2.00	chr6:45114426-45114926	BX942846.1	0.537607	Body	0.273835	sox13->chr6:45114426-45114926->BX942846.1	Act	0.295973	0.884475	0
foxo1a	M03823	chr6:45135887-45136387	BX942846.1	0.456812	Body	0.171002	foxo1a->chr6:45135887-45136387->BX942846.1	Act	0.378908	0.884475	0
rorb	M03376_2.00	chr6:45135887-45136387	BX942846.1	0.0542008	Body	0.153637	rorb->chr6:45135887-45136387->BX942846.1	Act	0.518637	0.884475	0
sox13	M05791_2.00	chr6:45135887-45136387	BX942846.1	0.534961	Body	0.273835	sox13->chr6:45135887-45136387->BX942846.1	Act	0.295973	0.884475	0
nfixa	M02050	chr6:45139520-45140020	BX942846.1	0.351999	Body	0.230187	nfixa->chr6:45139520-45140020->BX942846.1	Act	0.512419	0.884475	0
tead1a	M04141	chr6:45139520-45140020	BX942846.1	0.321624	Body	0.182607	tead1a->chr6:45139520-45140020->BX942846.1	Act	0.371967	0.884475	0
tead1b	M04141	chr6:45139520-45140020	BX942846.1	0.0965781	Body	0.162787	tead1b->chr6:45139520-45140020->BX942846.1	Act	0.42071	0.884475	0
ar	M08189	chr6:45139520-45140020	BX942846.1	0.387419	Body	0.37433	ar->chr6:45139520-45140020->BX942846.1	Act	0.456809	0.884475	0
foxo1a	M10537_2.00	chr6:45139520-45140020	BX942846.1	0.142621	Body	0.171002	foxo1a->chr6:45139520-45140020->BX942846.1	Act	0.378908	0.884475	0
nfixa	M00806	chr6:45297425-45297925	BX942846.1	0.230135	Body	0.230187	nfixa->chr6:45297425-45297925->BX942846.1	Act	0.512419	0.884475	0
tcf7l1a	M00805	chr23:28422859-28423359	c1ql4a	0.230037	Body	0.217727	tcf7l1a->chr23:28422859-28423359->c1ql4a	Act	0.287814	0.398719	0
fosl2	M00925	chr23:28422859-28423359	c1ql4a	0.55321	Body	0.253389	fosl2->chr23:28422859-28423359->c1ql4a	Act	0.273506	0.398719	0
vezf1a	M10107	chr23:28422859-28423359	c1ql4a	0.377438	Body	0.207299	vezf1a->chr23:28422859-28423359->c1ql4a	Act	0.393767	0.398719	0
onecut1	M09949	chr23:28301106-28301606	c1ql4a	0.0911367	Inter	0.239236	onecut1->chr23:28301106-28301606->c1ql4a	Act	0.261755	0.398719	0
foxo1a	M03823	chr23:28433845-28434345	c1ql4a	0.456812	Inter	0.175532	foxo1a->chr23:28433845-28434345->c1ql4a	Act	0.378908	0.398719	0
vezf1a	M10107	chr23:28433845-28434345	c1ql4a	0.377438	Inter	0.207299	vezf1a->chr23:28433845-28434345->c1ql4a	Act	0.393767	0.398719	0
zic2b	M00150_2.00	chr23:28433845-28434345	c1ql4a	0.172885	Inter	0.267734	zic2b->chr23:28433845-28434345->c1ql4a	Act	0.256339	0.398719	0
e2f1	M08874	chr23:28659195-28659695	c1ql4a	0.166133	Inter	0.134769	e2f1->chr23:28659195-28659695->c1ql4a	Act	0.349346	0.398719	0
zic2b	M02893_2.00	chr23:28659195-28659695	c1ql4a	0.211074	Inter	0.267734	zic2b->chr23:28659195-28659695->c1ql4a	Act	0.256339	0.398719	0
e2f3	M00662_2.00	chr21:5066237-5066737	C21H18orf25	0.107416	Body	0.133309	e2f3->chr21:5066237-5066737->C21H18orf25	Act	0.374128	0.346472	0
e2f3	M02089	chr21:5056409-5056909	C21H18orf25	0.104889	TSS	0.133309	e2f3->chr21:5056409-5056909->C21H18orf25	Act	0.374128	0.346472	0
tcf7l1a	M00712_2.00	chr21:5065547-5066047	C21H18orf25	0.25688	TSS	0.164462	tcf7l1a->chr21:5065547-5066047->C21H18orf25	Act	0.287814	0.346472	0
tcf7l1b	M00712_2.00	chr21:5065547-5066047	C21H18orf25	0.313419	TSS	0.153193	tcf7l1b->chr21:5065547-5066047->C21H18orf25	Act	0.390873	0.346472	0
e2f3	M09029_2.00	chr21:5065547-5066047	C21H18orf25	0.0851539	TSS	0.133309	e2f3->chr21:5065547-5066047->C21H18orf25	Act	0.374128	0.346472	0
lhx2b	M07047	chr8:31872698-31873198	c7a	0.193645	Body	0.408368	lhx2b->chr8:31872698-31873198->c7a	Act	0.275906	0.509375	0
vax2	M03805_2.00	chr8:31872698-31873198	c7a	0.0686145	Body	0.314919	vax2->chr8:31872698-31873198->c7a	Act	0.459159	0.509375	0
tead1a	M05823_2.00	chr8:31872698-31873198	c7a	0.361302	Body	0.169893	tead1a->chr8:31872698-31873198->c7a	Act	0.371967	0.509375	0
gli2a	M08875_2.00	chr8:31872698-31873198	c7a	0.114009	Body	0.49984	gli2a->chr8:31872698-31873198->c7a	Act	0.398694	0.509375	0
lhx2b	M07047	chr8:31640735-31641235	c7a	0.193645	Inter	0.408368	lhx2b->chr8:31640735-31641235->c7a	Act	0.275906	0.509375	0
vax2	M00286_2.00	chr8:31640735-31641235	c7a	0.0978728	Inter	0.314919	vax2->chr8:31640735-31641235->c7a	Act	0.459159	0.509375	0
rxraa	M09286_2.00	chr8:31640735-31641235	c7a	0.0793936	Inter	0.295396	rxraa->chr8:31640735-31641235->c7a	Act	0.560488	0.509375	0
rxraa	M04787	chr8:31735257-31735757	c7a	0.0608	Inter	0.295396	rxraa->chr8:31735257-31735757->c7a	Act	0.560488	0.509375	0
ar	M08189	chr8:31735257-31735757	c7a	0.387419	Inter	0.530248	ar->chr8:31735257-31735757->c7a	Act	0.456809	0.509375	0
stat3	M09714	chr8:31735257-31735757	c7a	0.292584	Inter	0.380394	stat3->chr8:31735257-31735757->c7a	Act	0.327768	0.509375	0
lhx2b	M00280_2.00	chr8:31735257-31735757	c7a	0.0564977	Inter	0.408368	lhx2b->chr8:31735257-31735757->c7a	Act	0.275906	0.509375	0
foxo1b	M00793_2.00	chr8:31735257-31735757	c7a	0.0589134	Inter	0.284136	foxo1b->chr8:31735257-31735757->c7a	Act	0.272074	0.509375	0
foxo1a	M03041_2.00	chr8:31735257-31735757	c7a	0.0544277	Inter	0.398659	foxo1a->chr8:31735257-31735757->c7a	Act	0.378908	0.509375	0
lhx2b	M07047	chr16:9539733-9540233	ca14	0.193645	Body	0.600732	lhx2b->chr16:9539733-9540233->ca14	Act	0.275906	0.614148	0
foxo1a	M08465	chr16:9539733-9540233	ca14	0.0548661	Body	0.441083	foxo1a->chr16:9539733-9540233->ca14	Act	0.378908	0.614148	0
klf12b	M08857_2.00	chr16:9539733-9540233	ca14	0.0584093	Body	0.503926	klf12b->chr16:9539733-9540233->ca14	Act	0.342959	0.614148	0
sox13	M11331_2.00	chr16:9539733-9540233	ca14	0.537607	Body	0.616251	sox13->chr16:9539733-9540233->ca14	Act	0.295973	0.614148	0
foxo1a	M01216	chr16:9541395-9541895	ca14	0.3512	Body	0.441083	foxo1a->chr16:9541395-9541895->ca14	Act	0.378908	0.614148	0
sox13	M08899	chr16:9541395-9541895	ca14	0.431399	Body	0.616251	sox13->chr16:9541395-9541895->ca14	Act	0.295973	0.614148	0
tcf7l2	M00712_2.00	chr16:9541395-9541895	ca14	0.358468	Body	0.490624	tcf7l2->chr16:9541395-9541895->ca14	Act	0.32183	0.614148	0
gli2a	M02641_2.00	chr16:9541395-9541895	ca14	0.163271	Body	0.669034	gli2a->chr16:9541395-9541895->ca14	Act	0.398694	0.614148	0
tcf7l1a	M03532_2.00	chr8:51932741-51933241	cabin1	0.0545043	TSS	0.206212	tcf7l1a->chr8:51932741-51933241->cabin1	Act	0.287814	0.301728	0
tcf7l1b	M03532_2.00	chr8:51932741-51933241	cabin1	0.0509361	TSS	0.183035	tcf7l1b->chr8:51932741-51933241->cabin1	Act	0.390873	0.301728	0
tcf7l1a	M03532_2.00	chr8:51933438-51933938	cabin1	0.0545043	TSS	0.206212	tcf7l1a->chr8:51933438-51933938->cabin1	Act	0.287814	0.301728	0
tcf7l1b	M03532_2.00	chr8:51933438-51933938	cabin1	0.0509361	TSS	0.183035	tcf7l1b->chr8:51933438-51933938->cabin1	Act	0.390873	0.301728	0
rorb	M03353_2.00	chr3:58247812-58248312	CABZ01038494.1	0.080356	Body	0.15553	rorb->chr3:58247812-58248312->CABZ01038494.1	Act	0.518637	0.328227	0
tead1a	M09434_2.00	chr3:58247812-58248312	CABZ01038494.1	0.302181	Body	0.133053	tead1a->chr3:58247812-58248312->CABZ01038494.1	Act	0.371967	0.328227	0
fosl2	M03870	chr3:58253211-58253711	CABZ01038494.1	0.573182	Body	0.117096	fosl2->chr3:58253211-58253711->CABZ01038494.1	Act	0.273506	0.328227	0
rorb	M03421_2.00	chr3:58230643-58231143	CABZ01038494.1	0.0731506	TSS	0.15553	rorb->chr3:58230643-58231143->CABZ01038494.1	Act	0.518637	0.328227	0
gli2a	M04403_2.00	chr15:46902480-46902980	CABZ01044053.1	0.0521742	Inter	0.0840476	gli2a->chr15:46902480-46902980->CABZ01044053.1	Act	0.398694	0.353247	0
vezf1a	M10107	chr15:46673218-46673718	CABZ01044053.1	0.377438	TSS	0.148972	vezf1a->chr15:46673218-46673718->CABZ01044053.1	Act	0.393767	0.353247	0
sox13	M01014	chr23:2386377-2386877	CABZ01048666.1	0.382335	Body	0.205332	sox13->chr23:2386377-2386877->CABZ01048666.1	Act	0.295973	0.349617	0
foxo1a	M03823	chr23:2386377-2386877	CABZ01048666.1	0.456812	Body	0.181857	foxo1a->chr23:2386377-2386877->CABZ01048666.1	Act	0.378908	0.349617	0
rorb	M05881_2.00	chr23:2386377-2386877	CABZ01048666.1	0.0636418	Body	0.17378	rorb->chr23:2386377-2386877->CABZ01048666.1	Act	0.518637	0.349617	0
tcf7l2	M05895_2.00	chr23:2386377-2386877	CABZ01048666.1	0.0852363	Body	0.143312	tcf7l2->chr23:2386377-2386877->CABZ01048666.1	Act	0.32183	0.349617	0
gli2a	M01037	chr23:2140429-2140929	CABZ01048666.1	0.0839593	Inter	0.24704	gli2a->chr23:2140429-2140929->CABZ01048666.1	Act	0.398694	0.349617	0.508433
rorb	M00184_2.00	chr23:2140429-2140929	CABZ01048666.1	0.0869793	Inter	0.17378	rorb->chr23:2140429-2140929->CABZ01048666.1	Act	0.518637	0.349617	0.508433
tcf7l2	M00712_2.00	chr23:2140429-2140929	CABZ01048666.1	0.358468	Inter	0.143312	tcf7l2->chr23:2140429-2140929->CABZ01048666.1	Act	0.32183	0.349617	0.508433
sox13	M03508_2.00	chr23:2140429-2140929	CABZ01048666.1	0.288403	Inter	0.205332	sox13->chr23:2140429-2140929->CABZ01048666.1	Act	0.295973	0.349617	0.508433
tead1a	M03575_2.00	chr23:2140429-2140929	CABZ01048666.1	0.157322	Inter	0.193797	tead1a->chr23:2140429-2140929->CABZ01048666.1	Act	0.371967	0.349617	0.508433
nr3c2	M07986_2.00	chr23:2140429-2140929	CABZ01048666.1	0.279897	Inter	0.12152	nr3c2->chr23:2140429-2140929->CABZ01048666.1	Act	0.390207	0.349617	0.508433
sox13	M05769_2.00	chr23:2331290-2331790	CABZ01048666.1	0.292601	Inter	0.205332	sox13->chr23:2331290-2331790->CABZ01048666.1	Act	0.295973	0.349617	0
gli2a	M08023_2.00	chr23:2331290-2331790	CABZ01048666.1	0.061166	Inter	0.24704	gli2a->chr23:2331290-2331790->CABZ01048666.1	Act	0.398694	0.349617	0
rorb	M09303_2.00	chr23:2331290-2331790	CABZ01048666.1	0.213101	Inter	0.17378	rorb->chr23:2331290-2331790->CABZ01048666.1	Act	0.518637	0.349617	0
rorb	M09303_2.00	chr23:2331878-2332378	CABZ01048666.1	0.213101	Inter	0.17378	rorb->chr23:2331878-2332378->CABZ01048666.1	Act	0.518637	0.349617	0
foxo1a	M03823	chr23:2332551-2333051	CABZ01048666.1	0.456812	Inter	0.181857	foxo1a->chr23:2332551-2333051->CABZ01048666.1	Act	0.378908	0.349617	0
sox13	M08899	chr23:2332551-2333051	CABZ01048666.1	0.431399	Inter	0.205332	sox13->chr23:2332551-2333051->CABZ01048666.1	Act	0.295973	0.349617	0
rorb	M07994_2.00	chr23:2332551-2333051	CABZ01048666.1	0.181469	Inter	0.17378	rorb->chr23:2332551-2333051->CABZ01048666.1	Act	0.518637	0.349617	0
gli2a	M03902	chr23:2467243-2467743	CABZ01048666.1	0.339781	Inter	0.24704	gli2a->chr23:2467243-2467743->CABZ01048666.1	Act	0.398694	0.349617	0
rorb	M05565_2.00	chr23:2467243-2467743	CABZ01048666.1	0.0777675	Inter	0.17378	rorb->chr23:2467243-2467743->CABZ01048666.1	Act	0.518637	0.349617	0
ar	M09863	chr10:41549978-41550478	CABZ01049847.1	0.149743	Body	0.418559	ar->chr10:41549978-41550478->CABZ01049847.1	Act	0.456809	0.365948	0
lhx2b	M00280_2.00	chr10:41549978-41550478	CABZ01049847.1	0.0564977	Body	0.285682	lhx2b->chr10:41549978-41550478->CABZ01049847.1	Act	0.275906	0.365948	0
nr3c2	M09288_2.00	chr10:41549978-41550478	CABZ01049847.1	0.248185	Body	0.287325	nr3c2->chr10:41549978-41550478->CABZ01049847.1	Act	0.390207	0.365948	0
nfixa	M00806	chr10:41560314-41560814	CABZ01049847.1	0.230135	Body	0.14422	nfixa->chr10:41560314-41560814->CABZ01049847.1	Act	0.512419	0.365948	0
tcf7l2	M07136	chr10:41560314-41560814	CABZ01049847.1	0.232667	Body	0.186701	tcf7l2->chr10:41560314-41560814->CABZ01049847.1	Act	0.32183	0.365948	0
vdrb	M02403_2.00	chr10:41560314-41560814	CABZ01049847.1	0.121503	Body	0.237968	vdrb->chr10:41560314-41560814->CABZ01049847.1	Act	0.421237	0.365948	0
rarab	M02706_2.00	chr10:41560314-41560814	CABZ01049847.1	0.315051	Body	0.297998	rarab->chr10:41560314-41560814->CABZ01049847.1	Act	0.271116	0.365948	0
gli2a	M04402_2.00	chr10:41560314-41560814	CABZ01049847.1	0.0887611	Body	0.23824	gli2a->chr10:41560314-41560814->CABZ01049847.1	Act	0.398694	0.365948	0
lhx2b	M06500_2.00	chr10:41560314-41560814	CABZ01049847.1	0.395248	Body	0.285682	lhx2b->chr10:41560314-41560814->CABZ01049847.1	Act	0.275906	0.365948	0
vax2	M06500_2.00	chr10:41560314-41560814	CABZ01049847.1	0.217695	Body	0.264911	vax2->chr10:41560314-41560814->CABZ01049847.1	Act	0.459159	0.365948	0
rarab	M09263_2.00	chr10:41564226-41564726	CABZ01049847.1	0.115508	Body	0.297998	rarab->chr10:41564226-41564726->CABZ01049847.1	Act	0.271116	0.365948	0
nfixa	M00056	chr10:41567492-41567992	CABZ01049847.1	0.0745108	Body	0.14422	nfixa->chr10:41567492-41567992->CABZ01049847.1	Act	0.512419	0.365948	0
rarab	M05566_2.00	chr10:41567492-41567992	CABZ01049847.1	0.087917	Body	0.297998	rarab->chr10:41567492-41567992->CABZ01049847.1	Act	0.271116	0.365948	0
vdrb	M09619_2.00	chr10:41567492-41567992	CABZ01049847.1	0.0513563	Body	0.237968	vdrb->chr10:41567492-41567992->CABZ01049847.1	Act	0.421237	0.365948	0
nfixa	M00056	chr10:41568036-41568536	CABZ01049847.1	0.0745108	Body	0.14422	nfixa->chr10:41568036-41568536->CABZ01049847.1	Act	0.512419	0.365948	0
vdrb	M09619_2.00	chr10:41568036-41568536	CABZ01049847.1	0.0513563	Body	0.237968	vdrb->chr10:41568036-41568536->CABZ01049847.1	Act	0.421237	0.365948	0
[truncated: 13,971 more rows]

## Sheet: tab3
TF	Motif	Peak	Target	TF_Motif_Cor	PtoG_Class	GG_Corr	Triple	type	TF_fold	Target_fold	Peak_fold
epas1b	M09906	chr2:16711531-16712031	atp1b3a	0.177594	Inter	0.73237	epas1b->chr2:16711531-16712031->atp1b3a	Act	0.446675	0.335376	0
epas1b	M09906	chr8:50682221-50682721	acsl2	0.177594	Inter	0.7293	epas1b->chr8:50682221-50682721->acsl2	Act	0.446675	0.306808	0.735172
epas1b	M09906	chr6:27082318-27082818	boka	0.177594	Body	0.676136	epas1b->chr6:27082318-27082818->boka	Act	0.446675	0.603999	0.717686
gli3	M02732_2.00	chr14:45621121-45621621	CR383676.2	0.0586833	Inter	0.606537	gli3->chr14:45621121-45621621->CR383676.2	Act	0.322273	0.386486	0
gli3	M01657	chr14:45632656-45633156	CR383676.2	0.0998304	Inter	0.606537	gli3->chr14:45632656-45633156->CR383676.2	Act	0.322273	0.386486	0
gli3	M01657	chr14:45633188-45633688	CR383676.2	0.0998304	Inter	0.606537	gli3->chr14:45633188-45633688->CR383676.2	Act	0.322273	0.386486	0
stat1b	M09713	chr15:17070642-17071142	lgals17	0.233498	Body	0.576288	stat1b->chr15:17070642-17071142->lgals17	Act	1.06852	0.736157	0
epas1b	M09906	chr15:35042715-35043215	sesn3	0.177594	Body	0.57428	epas1b->chr15:35042715-35043215->sesn3	Act	0.446675	0.348646	0.8036
hmga1a	M01010	chr16:51180681-51181181	hmgn2	0.109135	Body	0.566021	hmga1a->chr16:51180681-51181181->hmgn2	Act	0.360252	0.739979	0
hmga1a	M01105_2.00	chr16:51181260-51181760	hmgn2	0.0687208	TSS	0.566021	hmga1a->chr16:51181260-51181760->hmgn2	Act	0.360252	0.739979	0
gli3	M01704	chr6:6254204-6254704	rtn4a	0.133153	Body	0.541928	gli3->chr6:6254204-6254704->rtn4a	Act	0.322273	0.462113	0
gli3	M08023_2.00	chr15:40768376-40768876	fat3a	0.0723493	Body	0.540981	gli3->chr15:40768376-40768876->fat3a	Act	0.322273	0.29836	0
gli3	M01657	chr15:40771138-40771638	fat3a	0.0998304	Body	0.540981	gli3->chr15:40771138-40771638->fat3a	Act	0.322273	0.29836	0.535453
gli3	M01704	chr15:40515276-40515776	fat3a	0.133153	Inter	0.540981	gli3->chr15:40515276-40515776->fat3a	Act	0.322273	0.29836	1.77551
gli3	M01596	chr15:40792086-40792586	fat3a	0.108651	TSS	0.540981	gli3->chr15:40792086-40792586->fat3a	Act	0.322273	0.29836	0
stat1b	M09713	chr9:561300-561800	CU984600.2	0.233498	Inter	0.528533	stat1b->chr9:561300-561800->CU984600.2	Act	1.06852	1.13061	0.785112
gli3	M02641_2.00	chr25:6294846-6295346	crabp1a	0.165727	Inter	0.521562	gli3->chr25:6294846-6295346->crabp1a	Act	0.322273	0.287257	0
gli3	M02641_2.00	chr25:6295397-6295897	crabp1a	0.165727	Inter	0.521562	gli3->chr25:6295397-6295897->crabp1a	Act	0.322273	0.287257	0
epas1b	M09906	chr16:4446736-4447236	vegfaa	0.177594	Inter	0.514103	epas1b->chr16:4446736-4447236->vegfaa	Act	0.446675	0.742137	0
hmga1a	M01106_2.00	chr10:44984583-44985083	h2az2b	0.150625	TSS	0.489383	hmga1a->chr10:44984583-44985083->h2az2b	Act	0.360252	0.499606	0
epas1b	M09906	chr22:16072049-16072549	cdc14ab	0.177594	Inter	0.484326	epas1b->chr22:16072049-16072549->cdc14ab	Act	0.446675	0.481847	0
epas1b	M09906	chr22:16072049-16072549	s1pr1	0.177594	Inter	0.482675	epas1b->chr22:16072049-16072549->s1pr1	Act	0.446675	0.375235	0
gli3	M01704	chr16:46524366-46524866	tmem176l.1	0.133153	Body	0.480415	gli3->chr16:46524366-46524866->tmem176l.1	Act	0.322273	0.414423	0
gli3	M01704	chr16:46524875-46525375	tmem176l.1	0.133153	Body	0.480415	gli3->chr16:46524875-46525375->tmem176l.1	Act	0.322273	0.414423	0
gli3	M01596	chr16:46339655-46340155	tmem176l.1	0.108651	Inter	0.480415	gli3->chr16:46339655-46340155->tmem176l.1	Act	0.322273	0.414423	0
gli3	M01657	chr23:22658809-22659309	eno1a	0.0998304	Body	0.480235	gli3->chr23:22658809-22659309->eno1a	Act	0.322273	1.32058	0
gli3	M01704	chr23:22661008-22661508	eno1a	0.133153	Body	0.480235	gli3->chr23:22661008-22661508->eno1a	Act	0.322273	1.32058	0
gli3	M01657	chr23:22471553-22472053	eno1a	0.0998304	Inter	0.480235	gli3->chr23:22471553-22472053->eno1a	Act	0.322273	1.32058	2.1151
gli3	M01596	chr23:22864256-22864756	eno1a	0.108651	Inter	0.480235	gli3->chr23:22864256-22864756->eno1a	Act	0.322273	1.32058	0
gli3	M01596	chr23:22902702-22903202	eno1a	0.108651	Inter	0.480235	gli3->chr23:22902702-22903202->eno1a	Act	0.322273	1.32058	0
gli3	M01596	chr23:22903977-22904477	eno1a	0.108651	Inter	0.480235	gli3->chr23:22903977-22904477->eno1a	Act	0.322273	1.32058	0
gli3	M01596	chr23:22674634-22675134	eno1a	0.108651	TSS	0.480235	gli3->chr23:22674634-22675134->eno1a	Act	0.322273	1.32058	0
gli3	M01657	chr5:44995284-44995784	ctsla	0.0998304	Inter	0.461135	gli3->chr5:44995284-44995784->ctsla	Act	0.322273	0.551842	0
gli3	M01657	chr5:45037063-45037563	ctsla	0.0998304	Inter	0.461135	gli3->chr5:45037063-45037563->ctsla	Act	0.322273	0.551842	0
stat1b	M01823	chr13:37630575-37631075	ifi46	0.0995306	Body	0.45993	stat1b->chr13:37630575-37631075->ifi46	Act	1.06852	0.703488	0
gli3	M02876_2.00	chr4:16406555-16407055	dcn	0.319182	Body	0.459529	gli3->chr4:16406555-16407055->dcn	Act	0.322273	0.302365	1.54936
gli3	M01596	chr4:16271167-16271667	dcn	0.108651	Inter	0.459529	gli3->chr4:16271167-16271667->dcn	Act	0.322273	0.302365	0
gli3	M08023_2.00	chr4:16297681-16298181	dcn	0.0723493	Inter	0.459529	gli3->chr4:16297681-16298181->dcn	Act	0.322273	0.302365	0
gli3	M01657	chr4:16440134-16440634	dcn	0.0998304	Inter	0.459529	gli3->chr4:16440134-16440634->dcn	Act	0.322273	0.302365	0
gli3	M01596	chr9:35887554-35888054	atp1a1b	0.108651	Inter	0.459084	gli3->chr9:35887554-35888054->atp1a1b	Act	0.322273	0.390789	0
gli3	M01596	chr9:35890051-35890551	atp1a1b	0.108651	Inter	0.459084	gli3->chr9:35890051-35890551->atp1a1b	Act	0.322273	0.390789	0.704817
gli3	M01657	chr16:23401108-23401608	kcnn3	0.0998304	Inter	0.454318	gli3->chr16:23401108-23401608->kcnn3	Act	0.322273	0.290118	0
gli3	M02643_2.00	chr1:33365598-33366098	cd99	0.121256	Body	0.447404	gli3->chr1:33365598-33366098->cd99	Act	0.322273	0.447479	0
epas1b	M09906	chr21:24619552-24620052	arhgap32b	0.177594	Body	0.446719	epas1b->chr21:24619552-24620052->arhgap32b	Act	0.446675	0.254324	0
epas1b	M09906	chr15:15209848-15210348	proca1	0.177594	Inter	0.441709	epas1b->chr15:15209848-15210348->proca1	Act	0.446675	0.755872	2.2502
gli3	M01596	chr8:24281205-24281705	mmp9	0.108651	Body	0.429999	gli3->chr8:24281205-24281705->mmp9	Act	0.322273	1.59613	0.716257
gli3	M02641_2.00	chr15:15631649-15632149	proca1	0.165727	Inter	0.427745	gli3->chr15:15631649-15632149->proca1	Act	0.322273	0.755872	0
gli3	M08023_2.00	chr24:20446705-20447205	vill	0.0723493	Inter	0.424222	gli3->chr24:20446705-20447205->vill	Act	0.322273	0.569128	0
gli3	M01596	chr7:37812006-37812506	adcy7	0.108651	Body	0.422917	gli3->chr7:37812006-37812506->adcy7	Act	0.322273	0.615218	0
gli3	M02641_2.00	chr7:37829243-37829743	adcy7	0.165727	Body	0.422917	gli3->chr7:37829243-37829743->adcy7	Act	0.322273	0.615218	0
gli3	M01596	chr7:37835059-37835559	adcy7	0.108651	Body	0.422917	gli3->chr7:37835059-37835559->adcy7	Act	0.322273	0.615218	0
gli3	M01657	chr7:37629394-37629894	adcy7	0.0998304	Inter	0.422917	gli3->chr7:37629394-37629894->adcy7	Act	0.322273	0.615218	0.648726
gli3	M01657	chr7:37629925-37630425	adcy7	0.0998304	Inter	0.422917	gli3->chr7:37629925-37630425->adcy7	Act	0.322273	0.615218	2.08351
gli3	M02641_2.00	chr3:53617980-53618480	col5a3a	0.165727	Inter	0.418102	gli3->chr3:53617980-53618480->col5a3a	Act	0.322273	0.3139	0
gli3	M01704	chr3:53661583-53662083	col5a3a	0.133153	Inter	0.418102	gli3->chr3:53661583-53662083->col5a3a	Act	0.322273	0.3139	0
gli3	M07292	chr3:36102718-36103218	rab11fip4a	0.0927551	Body	0.415474	gli3->chr3:36102718-36103218->rab11fip4a	Act	0.322273	0.293728	0
gli3	M01657	chr3:35960648-35961148	rab11fip4a	0.0998304	Inter	0.415474	gli3->chr3:35960648-35961148->rab11fip4a	Act	0.322273	0.293728	0
gli3	M02876_2.00	chr3:36003388-36003888	rab11fip4a	0.319182	Inter	0.415474	gli3->chr3:36003388-36003888->rab11fip4a	Act	0.322273	0.293728	0.750694
gli3	M08023_2.00	chr3:36003980-36004480	rab11fip4a	0.0723493	Inter	0.415474	gli3->chr3:36003980-36004480->rab11fip4a	Act	0.322273	0.293728	0.446023
gli3	M01657	chr11:28167495-28167995	ephb2b	0.0998304	Body	0.415362	gli3->chr11:28167495-28167995->ephb2b	Act	0.322273	0.287507	0
gli3	M01657	chr11:28190515-28191015	ephb2b	0.0998304	Body	0.415362	gli3->chr11:28190515-28191015->ephb2b	Act	0.322273	0.287507	0
gli3	M01657	chr11:28191062-28191562	ephb2b	0.0998304	Body	0.415362	gli3->chr11:28191062-28191562->ephb2b	Act	0.322273	0.287507	0
gli3	M01596	chr11:28205299-28205799	ephb2b	0.108651	Body	0.415362	gli3->chr11:28205299-28205799->ephb2b	Act	0.322273	0.287507	0
gli3	M01657	chr11:28329894-28330394	ephb2b	0.0998304	Body	0.415362	gli3->chr11:28329894-28330394->ephb2b	Act	0.322273	0.287507	0
gli3	M02732_2.00	chr11:28373363-28373863	ephb2b	0.0586833	Body	0.415362	gli3->chr11:28373363-28373863->ephb2b	Act	0.322273	0.287507	0
gli3	M02732_2.00	chr25:37197722-37198222	slc1a2b	0.0586833	Inter	0.414776	gli3->chr25:37197722-37198222->slc1a2b	Act	0.322273	0.453236	0
gli3	M01657	chr3:31788650-31789150	gfap	0.0998304	Inter	0.41126	gli3->chr3:31788650-31789150->gfap	Act	0.322273	0.547776	0
gli3	M01704	chr3:31806325-31806825	gfap	0.133153	Inter	0.41126	gli3->chr3:31806325-31806825->gfap	Act	0.322273	0.547776	0.887541
hmga1a	M01691_2.00	chr1:38168730-38169230	hmgb2a	0.126671	Inter	0.409967	hmga1a->chr1:38168730-38169230->hmgb2a	Act	0.360252	0.631148	0
hmga1a	M01676_2.00	chr1:38170433-38170933	hmgb2a	0.0615374	TSS	0.409967	hmga1a->chr1:38170433-38170933->hmgb2a	Act	0.360252	0.631148	0
gli3	M02732_2.00	chr14:45621121-45621621	CR383676.3	0.0586833	Inter	0.405524	gli3->chr14:45621121-45621621->CR383676.3	Act	0.322273	0.288672	0
gli3	M01657	chr14:45632656-45633156	CR383676.3	0.0998304	Inter	0.405524	gli3->chr14:45632656-45633156->CR383676.3	Act	0.322273	0.288672	0
gli3	M01657	chr14:45633188-45633688	CR383676.3	0.0998304	Inter	0.405524	gli3->chr14:45633188-45633688->CR383676.3	Act	0.322273	0.288672	0
gli3	M01596	chr8:50682221-50682721	acsl2	0.108651	Inter	0.403063	gli3->chr8:50682221-50682721->acsl2	Act	0.322273	0.306808	0.735172
gli3	M01596	chr16:24501189-24501689	fxyd6l	0.108651	Inter	0.394048	gli3->chr16:24501189-24501689->fxyd6l	Act	0.322273	1.02601	0
gli3	M01704	chr16:24611931-24612431	fxyd6l	0.133153	TSS	0.394048	gli3->chr16:24611931-24612431->fxyd6l	Act	0.322273	1.02601	0
gli3	M02732_2.00	chr4:19658581-19659081	cacna2d1a	0.0586833	Inter	0.393187	gli3->chr4:19658581-19659081->cacna2d1a	Act	0.322273	0.395597	0
gli3	M01657	chr4:19897230-19897730	cacna2d1a	0.0998304	Inter	0.393187	gli3->chr4:19897230-19897730->cacna2d1a	Act	0.322273	0.395597	0
stat1b	M09713	chr3:17473835-17474335	dhx58	0.233498	Inter	0.392309	stat1b->chr3:17473835-17474335->dhx58	Act	1.06852	0.513818	0
stat2	M09733	chr9:41218553-41219053	stat1b	0.236789	Body	0.388734	stat2->chr9:41218553-41219053->stat1b	Act	1.0573	1.06852	1.59911
stat1b	M00496	chr6:39356617-39357117	stat2	0.08179	Inter	0.388734	stat1b->chr6:39356617-39357117->stat2	Act	1.06852	1.0573	0
gli3	M01657	chr15:37343487-37343987	aplp1	0.0998304	Inter	0.383414	gli3->chr15:37343487-37343987->aplp1	Act	0.322273	0.366425	0
hlfa	M08786_2.00	chr2:16567931-16568431	atp1b3a	0.25329	Inter	0.381123	hlfa->chr2:16567931-16568431->atp1b3a	Act	0.293109	0.335376	0
stat2	M10080	chr9:561300-561800	CU984600.2	0.239518	Inter	0.38077	stat2->chr9:561300-561800->CU984600.2	Act	1.0573	1.13061	0.785112
gli3	M01657	chr22:18929173-18929673	bsg	0.0998304	Body	0.380377	gli3->chr22:18929173-18929673->bsg	Act	0.322273	0.433629	1.07591
hlfa	M00260	chr9:35922879-35923379	atp1a1b	0.254499	Inter	0.376838	hlfa->chr9:35922879-35923379->atp1a1b	Act	0.293109	0.390789	0
hmga1a	M02652_2.00	chr21:27413022-27413522	slc29a2	0.0734655	Body	0.371616	hmga1a->chr21:27413022-27413522->slc29a2	Act	0.360252	0.590715	1.37589
gli3	M01704	chr6:41554898-41555398	srgap3	0.133153	Body	0.369465	gli3->chr6:41554898-41555398->srgap3	Act	0.322273	0.266787	0.634501
gli3	M01657	chr6:41572296-41572796	srgap3	0.0998304	Body	0.369465	gli3->chr6:41572296-41572796->srgap3	Act	0.322273	0.266787	0
gli3	M01704	chr6:41618523-41619023	srgap3	0.133153	Body	0.369465	gli3->chr6:41618523-41619023->srgap3	Act	0.322273	0.266787	0
gli3	M01596	chr23:23400527-23401027	her9	0.108651	Body	0.365993	gli3->chr23:23400527-23401027->her9	Act	0.322273	1.15394	0
gli3	M01596	chr23:23401132-23401632	her9	0.108651	Body	0.365993	gli3->chr23:23401132-23401632->her9	Act	0.322273	1.15394	0.356199
gli3	M01704	chr23:23242224-23242724	her9	0.133153	Inter	0.365993	gli3->chr23:23242224-23242724->her9	Act	0.322273	1.15394	0
gli3	M01657	chr23:23299213-23299713	her9	0.0998304	Inter	0.365993	gli3->chr23:23299213-23299713->her9	Act	0.322273	1.15394	0
gli3	M02876_2.00	chr23:23371209-23371709	her9	0.319182	Inter	0.365993	gli3->chr23:23371209-23371709->her9	Act	0.322273	1.15394	0
gli3	M01657	chr23:23416356-23416856	her9	0.0998304	Inter	0.365993	gli3->chr23:23416356-23416856->her9	Act	0.322273	1.15394	0
gli3	M02876_2.00	chr23:23531933-23532433	her9	0.319182	Inter	0.365993	gli3->chr23:23531933-23532433->her9	Act	0.322273	1.15394	0
hlfa	M00260	chr2:18988081-18988581	glula	0.254499	Body	0.365699	hlfa->chr2:18988081-18988581->glula	Act	0.293109	0.762876	0
hlfa	M10258	chr2:19004220-19004720	glula	0.290723	Inter	0.365699	hlfa->chr2:19004220-19004720->glula	Act	0.293109	0.762876	0
hlfa	M01803_2.00	chr2:18987447-18987947	glula	0.258915	TSS	0.365699	hlfa->chr2:18987447-18987947->glula	Act	0.293109	0.762876	0
hlfa	M00260	chr2:18988756-18989256	glula	0.254499	TSS	0.365699	hlfa->chr2:18988756-18989256->glula	Act	0.293109	0.762876	0
stat2	M10080	chr15:17070642-17071142	lgals17	0.239518	Body	0.364521	stat2->chr15:17070642-17071142->lgals17	Act	1.0573	0.736157	0
hmga1a	M01691_2.00	chr5:30535169-30535669	h2ax	0.126671	Body	0.362041	hmga1a->chr5:30535169-30535669->h2ax	Act	0.360252	0.49171	0
hmga1a	M01691_2.00	chr5:30536502-30537002	h2ax	0.126671	Inter	0.362041	hmga1a->chr5:30536502-30537002->h2ax	Act	0.360252	0.49171	0
hmga1a	M01105_2.00	chr5:30537045-30537545	h2ax	0.0687208	Inter	0.362041	hmga1a->chr5:30537045-30537545->h2ax	Act	0.360252	0.49171	0
hmga1a	M01691_2.00	chr5:30535715-30536215	h2ax	0.126671	TSS	0.362041	hmga1a->chr5:30535715-30536215->h2ax	Act	0.360252	0.49171	0
gli3	M01596	chr2:52253611-52254111	plpp2a	0.108651	Body	0.359834	gli3->chr2:52253611-52254111->plpp2a	Act	0.322273	0.327437	0
gli3	M01596	chr2:52207465-52207965	plpp2a	0.108651	Inter	0.359834	gli3->chr2:52207465-52207965->plpp2a	Act	0.322273	0.327437	0
hlfa	M00260	chr10:24381668-24382168	slc43a2b	0.254499	Body	0.35634	hlfa->chr10:24381668-24382168->slc43a2b	Act	0.293109	0.36911	0
hlfa	M04016_2.00	chr13:8443644-8444144	epas1b	0.250429	Body	0.354466	hlfa->chr13:8443644-8444144->epas1b	Act	0.293109	0.446675	0
gli3	M02876_2.00	chr8:47156868-47157368	espn	0.319182	Inter	0.349533	gli3->chr8:47156868-47157368->espn	Act	0.322273	0.262076	0
hmga1a	M01689_2.00	chr7:12967907-12968407	rplp2l	0.0766518	TSS	0.348794	hmga1a->chr7:12967907-12968407->rplp2l	Act	0.360252	1.01779	0
epas1b	M09906	chr25:6307043-6307543	crabp1a	0.177594	Body	0.348594	epas1b->chr25:6307043-6307543->crabp1a	Act	0.446675	0.287257	0.674395
epas1b	M09906	chr22:19640040-19640540	rgmd	0.177594	Body	0.348068	epas1b->chr22:19640040-19640540->rgmd	Act	0.446675	0.854115	0
epas1b	M09906	chr22:19640678-19641178	rgmd	0.177594	TSS	0.348068	epas1b->chr22:19640678-19641178->rgmd	Act	0.446675	0.854115	0.817224
stat1b	M00224	chr13:37608162-37608662	ifi45	0.0850499	TSS	0.348032	stat1b->chr13:37608162-37608662->ifi45	Act	1.06852	0.530607	2.31578
hmga1a	M01105_2.00	chr19:1751647-1752147	rplp1	0.0687208	Inter	0.344539	hmga1a->chr19:1751647-1752147->rplp1	Act	0.360252	1.20582	0
gli3	M02641_2.00	chr10:9145937-9146437	fstb	0.165727	Inter	0.34406	gli3->chr10:9145937-9146437->fstb	Act	0.322273	0.69435	0
hmga1a	M01105_2.00	chr3:45776271-45776771	h3f3b.1	0.0687208	TSS	0.344043	hmga1a->chr3:45776271-45776771->h3f3b.1	Act	0.360252	1.0065	0
hmga1a	M01105_2.00	chr3:45776888-45777388	h3f3b.1	0.0687208	TSS	0.344043	hmga1a->chr3:45776888-45777388->h3f3b.1	Act	0.360252	1.0065	0
hmga1a	M01689_2.00	chr3:45778481-45778981	h3f3b.1	0.0766518	TSS	0.344043	hmga1a->chr3:45778481-45778981->h3f3b.1	Act	0.360252	1.0065	0.833914
hmga1a	M01010	chr15:47865346-47865846	h3f3b.1	0.109135	TSS	0.344043	hmga1a->chr15:47865346-47865846->h3f3b.1	Act	0.360252	1.0065	0
gli3	M01657	chr17:15431272-15431772	fabp7a	0.0998304	Inter	0.341794	gli3->chr17:15431272-15431772->fabp7a	Act	0.322273	1.66803	0
gli3	M01657	chr5:32510660-32511160	gas1b	0.0998304	Inter	0.340978	gli3->chr5:32510660-32511160->gas1b	Act	0.322273	0.338229	0
gli3	M02641_2.00	chr5:32535437-32535937	gas1b	0.165727	Inter	0.340978	gli3->chr5:32535437-32535937->gas1b	Act	0.322273	0.338229	2.6278
gli3	M01657	chr5:32562047-32562547	gas1b	0.0998304	Inter	0.340978	gli3->chr5:32562047-32562547->gas1b	Act	0.322273	0.338229	0
gli3	M01596	chr5:32571611-32572111	gas1b	0.108651	Inter	0.340978	gli3->chr5:32571611-32572111->gas1b	Act	0.322273	0.338229	0
gli3	M01657	chr5:32574484-32574984	gas1b	0.0998304	Inter	0.340978	gli3->chr5:32574484-32574984->gas1b	Act	0.322273	0.338229	0
gli3	M08023_2.00	chr5:32578443-32578943	gas1b	0.0723493	Inter	0.340978	gli3->chr5:32578443-32578943->gas1b	Act	0.322273	0.338229	0
gli3	M01657	chr23:17201241-17201741	ppdpfb	0.0998304	Inter	0.340913	gli3->chr23:17201241-17201741->ppdpfb	Act	0.322273	0.497716	1.0456
gli3	M02641_2.00	chr23:17626786-17627286	ppdpfb	0.165727	Inter	0.340913	gli3->chr23:17626786-17627286->ppdpfb	Act	0.322273	0.497716	0
gli3	M01657	chr8:29032663-29033163	grid2	0.0998304	Body	0.338219	gli3->chr8:29032663-29033163->grid2	Act	0.322273	0.733295	0
gli3	M01596	chr8:29267063-29267563	grid2	0.108651	TSS	0.338219	gli3->chr8:29267063-29267563->grid2	Act	0.322273	0.733295	0
gli3	M08023_2.00	chr13:42011044-42011544	cyp1b1	0.0723493	Body	0.331035	gli3->chr13:42011044-42011544->cyp1b1	Act	0.322273	0.370221	0
gli3	M01596	chr13:41999408-41999908	cyp1b1	0.108651	Inter	0.331035	gli3->chr13:41999408-41999908->cyp1b1	Act	0.322273	0.370221	0
gli3	M08875_2.00	chr23:25917218-25917718	pkig	0.128862	Body	0.325157	gli3->chr23:25917218-25917718->pkig	Act	0.322273	0.403128	0
gli3	M02641_2.00	chr23:25730203-25730703	pkig	0.165727	Inter	0.325157	gli3->chr23:25730203-25730703->pkig	Act	0.322273	0.403128	0.844394
gli3	M02641_2.00	chr23:25730771-25731271	pkig	0.165727	Inter	0.325157	gli3->chr23:25730771-25731271->pkig	Act	0.322273	0.403128	0
gli3	M01657	chr23:25893025-25893525	pkig	0.0998304	TSS	0.325157	gli3->chr23:25893025-25893525->pkig	Act	0.322273	0.403128	1.35013
stat2	M09733	chr12:35936132-35936632	rnf213b	0.236789	Body	0.324231	stat2->chr12:35936132-35936632->rnf213b	Act	1.0573	0.435355	2.114
vax2	M03186_2.00	chr24:13269929-13270429	rdh10a	0.13708	Body	0.32378	vax2->chr24:13269929-13270429->rdh10a	Act	0.653235	0.813543	0.933554
vax2	M00414_2.00	chr24:13421676-13422176	rdh10a	0.0719062	Inter	0.32378	vax2->chr24:13421676-13422176->rdh10a	Act	0.653235	0.813543	1.66936
vax2	M06482_2.00	chr24:13461594-13462094	rdh10a	0.133353	Inter	0.32378	vax2->chr24:13461594-13462094->rdh10a	Act	0.653235	0.813543	0
stat1b	M00492	chr7:43706215-43706715	BX005396.2	0.108941	Inter	0.323673	stat1b->chr7:43706215-43706715->BX005396.2	Act	1.06852	0.382386	0
stat1b	M09713	chr7:43780523-43781023	BX005396.2	0.233498	Inter	0.323673	stat1b->chr7:43780523-43781023->BX005396.2	Act	1.06852	0.382386	0
gli3	M01657	chr25:22553180-22553680	stra6	0.0998304	Inter	0.321713	gli3->chr25:22553180-22553680->stra6	Act	0.322273	0.500003	0
hlfa	M04212	chr7:37795282-37795782	adcy7	0.280394	Body	0.32127	hlfa->chr7:37795282-37795782->adcy7	Act	0.293109	0.615218	0
gli3	M01596	chr16:23962660-23963160	nbn	0.108651	Body	0.318912	gli3->chr16:23962660-23963160->nbn	Act	0.322273	1.13562	2.62557
gli3	M02876_2.00	chr14:7238610-7239110	hbegfa	0.319182	Inter	0.316833	gli3->chr14:7238610-7239110->hbegfa	Act	0.322273	0.673079	0
hmga1a	M01691_2.00	chr8:28519261-28519761	tuba8l	0.126671	Inter	0.316681	hmga1a->chr8:28519261-28519761->tuba8l	Act	0.360252	0.379928	2.20509
hmga1a	M01691_2.00	chr23:35705701-35706201	tuba1a	0.126671	Inter	0.316147	hmga1a->chr23:35705701-35706201->tuba1a	Act	0.360252	0.471584	0
stat1b	M00496	chr5:44805068-44805568	ctsla	0.08179	Body	0.315323	stat1b->chr5:44805068-44805568->ctsla	Act	1.06852	0.551842	0
epas1b	M09906	chr12:22557675-22558175	zbtb4	0.177594	Inter	0.313527	epas1b->chr12:22557675-22558175->zbtb4	Act	0.446675	0.278643	0
gli3	M01657	chr6:49673206-49673706	apcdd1l	0.0998304	Body	0.312959	gli3->chr6:49673206-49673706->apcdd1l	Act	0.322273	0.4186	0
gli3	M01657	chr7:32719078-32719578	pkp3b	0.0998304	Inter	0.309769	gli3->chr7:32719078-32719578->pkp3b	Act	0.322273	0.42544	0
gli3	M08023_2.00	chr7:33111465-33111965	pkp3b	0.0723493	Inter	0.309769	gli3->chr7:33111465-33111965->pkp3b	Act	0.322273	0.42544	0
gli3	M01657	chr7:33158993-33159493	pkp3b	0.0998304	Inter	0.309769	gli3->chr7:33158993-33159493->pkp3b	Act	0.322273	0.42544	2.12596
gli3	M01657	chr7:32981731-32982231	pkp3b	0.0998304	TSS	0.309769	gli3->chr7:32981731-32982231->pkp3b	Act	0.322273	0.42544	1.06509
hmga1a	M01689_2.00	chr3:18263283-18263783	rps2	0.0766518	Inter	0.305946	hmga1a->chr3:18263283-18263783->rps2	Act	0.360252	0.870983	0
hmga1a	M01106_2.00	chr3:18266275-18266775	rps2	0.150625	Inter	0.305946	hmga1a->chr3:18266275-18266775->rps2	Act	0.360252	0.870983	0.301482
gli3	M01657	chr1:47281682-47282182	fstl1a	0.0998304	Inter	0.301892	gli3->chr1:47281682-47282182->fstl1a	Act	0.322273	1.33948	0
gli3	M02876_2.00	chr1:47434330-47434830	fstl1a	0.319182	Inter	0.301892	gli3->chr1:47434330-47434830->fstl1a	Act	0.322273	1.33948	3.57216
hmga1a	M02652_2.00	chr6:54179813-54180313	rps10	0.0734655	TSS	0.299588	hmga1a->chr6:54179813-54180313->rps10	Act	0.360252	1.10528	0
stat1b	M00496	chr9:29616591-29617091	phf11	0.08179	Body	0.299392	stat1b->chr9:29616591-29617091->phf11	Act	1.06852	0.265035	0
tfap2d	M00111_2.00	chr17:44245931-44246431	otx2b	0.113636	Body	0.295504	tfap2d->chr17:44245931-44246431->otx2b	Act	0.370704	0.721832	0
tfap2d	M04052_2.00	chr17:44267693-44268193	otx2b	0.135947	Inter	0.295504	tfap2d->chr17:44267693-44268193->otx2b	Act	0.370704	0.721832	0
tfap2d	M04048_2.00	chr17:44361372-44361872	otx2b	0.0788865	Inter	0.295504	tfap2d->chr17:44361372-44361872->otx2b	Act	0.370704	0.721832	0
tfap2d	M00111_2.00	chr17:44399114-44399614	otx2b	0.113636	Inter	0.295504	tfap2d->chr17:44399114-44399614->otx2b	Act	0.370704	0.721832	0
gli3	M08875_2.00	chr9:21694261-21694761	BX649266.1	0.128862	Inter	0.292681	gli3->chr9:21694261-21694761->BX649266.1	Act	0.322273	0.560956	0
gli3	M01657	chr9:21798415-21798915	BX649266.1	0.0998304	Inter	0.292681	gli3->chr9:21798415-21798915->BX649266.1	Act	0.322273	0.560956	0
gli3	M01657	chr12:22529986-22530486	zbtb4	0.0998304	Body	0.290535	gli3->chr12:22529986-22530486->zbtb4	Act	0.322273	0.278643	0.620853
gli3	M01657	chr12:22538874-22539374	zbtb4	0.0998304	Body	0.290535	gli3->chr12:22538874-22539374->zbtb4	Act	0.322273	0.278643	0
gli3	M08875_2.00	chr12:22540258-22540758	zbtb4	0.128862	Body	0.290535	gli3->chr12:22540258-22540758->zbtb4	Act	0.322273	0.278643	0
gli3	M08875_2.00	chr12:22540795-22541295	zbtb4	0.128862	Body	0.290535	gli3->chr12:22540795-22541295->zbtb4	Act	0.322273	0.278643	0.511418
gli3	M01657	chr12:22715724-22716224	zbtb4	0.0998304	Inter	0.290535	gli3->chr12:22715724-22716224->zbtb4	Act	0.322273	0.278643	0
gli3	M07292	chr11:10975133-10975633	itgb6	0.0927551	Body	0.289773	gli3->chr11:10975133-10975633->itgb6	Act	0.322273	0.441087	0.94084
hmga1a	M01676_2.00	chr17:44267693-44268193	otx2b	0.0615374	Inter	0.289136	hmga1a->chr17:44267693-44268193->otx2b	Act	0.360252	0.721832	0
epas1b	M09906	chr1:15470259-15470759	dlc1	0.177594	Inter	0.288425	epas1b->chr1:15470259-15470759->dlc1	Act	0.446675	0.381025	0
sox11b	M08042_2.00	chr16:51181799-51182299	hmgn2	0.0515707	Body	0.286414	sox11b->chr16:51181799-51182299->hmgn2	Act	0.594402	0.739979	0
stat2	M10080	chr5:44805068-44805568	ctsla	0.239518	Body	0.285257	stat2->chr5:44805068-44805568->ctsla	Act	1.0573	0.551842	0
gli3	M08875_2.00	chr25:7873184-7873684	mdkb	0.128862	Body	0.285052	gli3->chr25:7873184-7873684->mdkb	Act	0.322273	0.401257	0.495325
gli3	M01657	chr25:7853418-7853918	mdkb	0.0998304	Inter	0.285052	gli3->chr25:7853418-7853918->mdkb	Act	0.322273	0.401257	0.405659
gli3	M08875_2.00	chr25:7872548-7873048	mdkb	0.128862	TSS	0.285052	gli3->chr25:7872548-7873048->mdkb	Act	0.322273	0.401257	0
gli3	M01704	chr8:50941937-50942437	b2ml	0.133153	TSS	0.282993	gli3->chr8:50941937-50942437->b2ml	Act	0.322273	0.579854	0
gli3	M02876_2.00	chr22:19668464-19668964	rgmd	0.319182	Inter	0.2822	gli3->chr22:19668464-19668964->rgmd	Act	0.322273	0.854115	1.96018
hmga1a	M01676_2.00	chr19:43118700-43119200	eef1a1l1	0.0615374	TSS	0.279519	hmga1a->chr19:43118700-43119200->eef1a1l1	Act	0.360252	1.07758	0
epas1b	M09906	chr20:6700034-6700534	igfbp1a	0.177594	Inter	0.278175	epas1b->chr20:6700034-6700534->igfbp1a	Act	0.446675	0.494986	0
hmga1a	M01010	chr21:19061485-19061985	rpl17	0.109135	TSS	0.277369	hmga1a->chr21:19061485-19061985->rpl17	Act	0.360252	0.524961	0
hmga1a	M01676_2.00	chr20:30032108-30032608	sox11b	0.0615374	Inter	0.274442	hmga1a->chr20:30032108-30032608->sox11b	Act	0.360252	0.594402	0.754856
sox11b	M08042_2.00	chr23:3756351-3756851	hmga1a	0.0515707	Body	0.274442	sox11b->chr23:3756351-3756851->hmga1a	Act	0.594402	0.360252	0.872379
sox11b	M08042_2.00	chr23:3761140-3761640	hmga1a	0.0515707	Inter	0.274442	sox11b->chr23:3761140-3761640->hmga1a	Act	0.594402	0.360252	2.34606
stat1b	M09713	chr16:23229782-23230282	icn	0.233498	Inter	0.273989	stat1b->chr16:23229782-23230282->icn	Act	1.06852	1.13631	0
vax2	M05224_2.00	chr22:19742632-19743132	rgmd	0.0896424	Inter	0.273984	vax2->chr22:19742632-19743132->rgmd	Act	0.653235	0.854115	0
vax2	M03792_2.00	chr22:19884705-19885205	rgmd	0.0779946	Inter	0.273984	vax2->chr22:19884705-19885205->rgmd	Act	0.653235	0.854115	0
stat1b	M01823	chr19:7150942-7151442	tapbp.1	0.0995306	Inter	0.273043	stat1b->chr19:7150942-7151442->tapbp.1	Act	1.06852	0.443677	0
hmga1a	M01105_2.00	chr1:44843565-44844065	rps6	0.0687208	Inter	0.272179	hmga1a->chr1:44843565-44844065->rps6	Act	0.360252	0.785944	0
hlfa	M03645_2.00	chr15:35054601-35055101	sesn3	0.2822	Body	0.27187	hlfa->chr15:35054601-35055101->sesn3	Act	0.293109	0.348646	0.760673
hmga1a	M01691_2.00	chr23:19586402-19586902	rpl10	0.126671	Inter	0.271442	hmga1a->chr23:19586402-19586902->rpl10	Act	0.360252	1.11854	0
hmga1a	M01691_2.00	chr23:19715565-19716065	rpl10	0.126671	TSS	0.271442	hmga1a->chr23:19715565-19716065->rpl10	Act	0.360252	1.11854	0
stat1b	M09713	chr9:21418764-21419264	BX649266.1	0.233498	Inter	0.268794	stat1b->chr9:21418764-21419264->BX649266.1	Act	1.06852	0.560956	0
stat2	M09733	chr3:17686904-17687404	dhx58	0.236789	Inter	0.268733	stat2->chr3:17686904-17687404->dhx58	Act	1.0573	0.513818	2.15605
stat2	M09733	chr6:58569571-58570071	helz2	0.236789	Body	0.268088	stat2->chr6:58569571-58570071->helz2	Act	1.0573	0.519517	2.27216
gli3	M02641_2.00	chr19:42077134-42077634	cart4	0.165727	Inter	0.267407	gli3->chr19:42077134-42077634->cart4	Act	0.322273	0.563417	0
gli3	M01704	chr19:42257148-42257648	cart4	0.133153	Inter	0.267407	gli3->chr19:42257148-42257648->cart4	Act	0.322273	0.563417	0
hmga1a	M02652_2.00	chr7:51638857-51639357	rps4x	0.0734655	TSS	0.267208	hmga1a->chr7:51638857-51639357->rps4x	Act	0.360252	0.772185	0
hmga1a	M02652_2.00	chr7:51639445-51639945	rps4x	0.0734655	TSS	0.267208	hmga1a->chr7:51639445-51639945->rps4x	Act	0.360252	0.772185	0
vax2	M03848_2.00	chr11:28185403-28185903	ephb2b	0.11211	Body	0.266788	vax2->chr11:28185403-28185903->ephb2b	Act	0.653235	0.287507	0
vax2	M03792_2.00	chr11:28187330-28187830	ephb2b	0.0779946	Body	0.266788	vax2->chr11:28187330-28187830->ephb2b	Act	0.653235	0.287507	0.324311
vax2	M06500_2.00	chr11:28190515-28191015	ephb2b	0.110328	Body	0.266788	vax2->chr11:28190515-28191015->ephb2b	Act	0.653235	0.287507	0
vax2	M05197_2.00	chr11:28202053-28202553	ephb2b	0.0911311	Body	0.266788	vax2->chr11:28202053-28202553->ephb2b	Act	0.653235	0.287507	0.958255
vax2	M05143_2.00	chr11:28351593-28352093	ephb2b	0.0911311	Body	0.266788	vax2->chr11:28351593-28352093->ephb2b	Act	0.653235	0.287507	0
vax2	M05224_2.00	chr11:28382816-28383316	ephb2b	0.0896424	Body	0.266788	vax2->chr11:28382816-28383316->ephb2b	Act	0.653235	0.287507	0
vax2	M06500_2.00	chr11:28165589-28166089	ephb2b	0.110328	TSS	0.266788	vax2->chr11:28165589-28166089->ephb2b	Act	0.653235	0.287507	0
vax2	M03792_2.00	chr11:28166628-28167128	ephb2b	0.0779946	TSS	0.266788	vax2->chr11:28166628-28167128->ephb2b	Act	0.653235	0.287507	0
vax2	M10715_2.00	chr11:28218444-28218944	ephb2b	0.0739327	TSS	0.266788	vax2->chr11:28218444-28218944->ephb2b	Act	0.653235	0.287507	0
hmga1a	M01691_2.00	chr17:15432722-15433222	fabp7a	0.126671	TSS	0.265601	hmga1a->chr17:15432722-15433222->fabp7a	Act	0.360252	1.66803	0
hmga1a	M01691_2.00	chr17:15433243-15433743	fabp7a	0.126671	TSS	0.265601	hmga1a->chr17:15433243-15433743->fabp7a	Act	0.360252	1.66803	0
hmga1a	M01010	chr2:57038462-57038962	eef2b	0.109135	Inter	0.26534	hmga1a->chr2:57038462-57038962->eef2b	Act	0.360252	0.364311	1.49551
hmga1a	M01691_2.00	chr2:57360300-57360800	eef2b	0.126671	Inter	0.26534	hmga1a->chr2:57360300-57360800->eef2b	Act	0.360252	0.364311	0
stat1b	M00492	chr8:50738409-50738909	b2ml	0.108941	Inter	0.263026	stat1b->chr8:50738409-50738909->b2ml	Act	1.06852	0.579854	0
hmga1a	M01691_2.00	chr19:18626798-18627298	rps18	0.126671	TSS	0.262801	hmga1a->chr19:18626798-18627298->rps18	Act	0.360252	0.752765	0
gli3	M08875_2.00	chr3:44059799-44060299	il4r.1	0.128862	Body	0.261936	gli3->chr3:44059799-44060299->il4r.1	Act	0.322273	0.305552	0
gli3	M02732_2.00	chr24:13272925-13273425	rdh10a	0.0586833	TSS	0.261896	gli3->chr24:13272925-13273425->rdh10a	Act	0.322273	0.813543	0.625196
gli3	M08023_2.00	chr5:21883845-21884345	msna	0.0723493	Inter	0.261653	gli3->chr5:21883845-21884345->msna	Act	0.322273	0.28886	1.83864
gli3	M02876_2.00	chr5:21896396-21896896	msna	0.319182	Inter	0.261653	gli3->chr5:21896396-21896896->msna	Act	0.322273	0.28886	1.63968
gli3	M02732_2.00	chr20:24952459-24952959	epha7	0.0586833	Body	0.260516	gli3->chr20:24952459-24952959->epha7	Act	0.322273	0.396282	0
gli3	M08875_2.00	chr20:24716703-24717203	epha7	0.128862	Inter	0.260516	gli3->chr20:24716703-24717203->epha7	Act	0.322273	0.396282	0
gli3	M02876_2.00	chr20:25079259-25079759	epha7	0.319182	Inter	0.260516	gli3->chr20:25079259-25079759->epha7	Act	0.322273	0.396282	0
stat2	M10080	chr7:43780523-43781023	BX005396.2	0.239518	Inter	0.260034	stat2->chr7:43780523-43781023->BX005396.2	Act	1.0573	0.382386	0
sox11b	M00710_2.00	chr19:43096883-43097383	eef1a1l1	0.0519373	Inter	0.259315	sox11b->chr19:43096883-43097383->eef1a1l1	Act	0.594402	1.07758	0
hmga1a	M02652_2.00	chr6:13205783-13206283	eef1b2	0.0734655	TSS	0.258824	hmga1a->chr6:13205783-13206283->eef1b2	Act	0.360252	0.558614	0
hmga1a	M02652_2.00	chr6:13206457-13206957	eef1b2	0.0734655	TSS	0.258824	hmga1a->chr6:13206457-13206957->eef1b2	Act	0.360252	0.558614	0
stat2	M09733	chr13:37608162-37608662	ifi45	0.236789	TSS	0.255967	stat2->chr13:37608162-37608662->ifi45	Act	1.0573	0.530607	2.31578
hlfa	M00260	chr22:16092904-16093404	cdc14ab	0.254499	Inter	0.254319	hlfa->chr22:16092904-16093404->cdc14ab	Act	0.293109	0.481847	1.60041
hmga1a	M01691_2.00	chr15:39970906-39971406	rps5	0.126671	TSS	0.253816	hmga1a->chr15:39970906-39971406->rps5	Act	0.360252	0.734345	0
hmga1a	M01106_2.00	chr15:39971471-39971971	rps5	0.150625	TSS	0.253816	hmga1a->chr15:39971471-39971971->rps5	Act	0.360252	0.734345	0
hmga1a	M01106_2.00	chr15:39971991-39972491	rps5	0.150625	TSS	0.253816	hmga1a->chr15:39971991-39972491->rps5	Act	0.360252	0.734345	0
gli3	M02641_2.00	chr13:46924628-46925128	tmem63ba	0.165727	Inter	0.252855	gli3->chr13:46924628-46925128->tmem63ba	Act	0.322273	0.387873	0.648296
epas1b	M09906	chr8:26819516-26820016	slc16a1b	0.177594	Inter	0.252095	epas1b->chr8:26819516-26820016->slc16a1b	Act	0.446675	0.318721	0.558783
hlfa	M10258	chr11:196942-197442	col2a1b	0.290723	Inter	0.250696	hlfa->chr11:196942-197442->col2a1b	Act	0.293109	0.53192	0
hlfa	M04212	chr11:218782-219282	col2a1b	0.280394	Inter	0.250696	hlfa->chr11:218782-219282->col2a1b	Act	0.293109	0.53192	0
gli3	M02876_2.00	chr22:10783518-10784018	enc3	0.319182	Body	0.250376	gli3->chr22:10783518-10784018->enc3	Act	0.322273	0.27668	0
gli3	M02876_2.00	chr22:10784212-10784712	enc3	0.319182	Body	0.250376	gli3->chr22:10784212-10784712->enc3	Act	0.322273	0.27668	1.56256
gli3	M02643_2.00	chr22:10969061-10969561	enc3	0.121256	Inter	0.250376	gli3->chr22:10969061-10969561->enc3	Act	0.322273	0.27668	0
hlfa	M00260	chr10:16276439-16276939	slc27a6	0.254499	Inter	0.250116	hlfa->chr10:16276439-16276939->slc27a6	Act	0.293109	0.38317	0
gli3	M08875_2.00	chr9:695895-696395	CU984600.2	0.128862	Inter	0.249577	gli3->chr9:695895-696395->CU984600.2	Act	0.322273	1.13061	0.644614
hmga1a	M01105_2.00	chr7:57637548-57638048	mad2l1	0.0687208	Body	0.248811	hmga1a->chr7:57637548-57638048->mad2l1	Act	0.360252	0.471502	1.71181
stat1a	M09713	chr15:17070642-17071142	lgals17	0.150431	Body	0.242125	stat1a->chr15:17070642-17071142->lgals17	Act	0.457721	0.736157	0
hmga1a	M02652_2.00	chr11:45016328-45016828	RPL37A	0.0734655	Inter	0.241905	hmga1a->chr11:45016328-45016828->RPL37A	Act	0.360252	0.87827	0
epas1b	M09906	chr25:30298109-30298609	C25H11orf96	0.177594	Body	0.240855	epas1b->chr25:30298109-30298609->C25H11orf96	Act	0.446675	0.542054	0
epas1b	M09906	chr25:25123683-25124183	ldha	0.177594	TSS	0.23856	epas1b->chr25:25123683-25124183->ldha	Act	0.446675	0.533317	0
hmga1a	M01691_2.00	chr5:22700316-22700816	rpl36a	0.126671	Inter	0.237954	hmga1a->chr5:22700316-22700816->rpl36a	Act	0.360252	1.09322	0
hmga1a	M01105_2.00	chr6:6270466-6270966	rps27a	0.0687208	TSS	0.237364	hmga1a->chr6:6270466-6270966->rps27a	Act	0.360252	0.845236	0
gli3	M08875_2.00	chr20:39246000-39246500	cyp39a1	0.128862	Inter	0.235809	gli3->chr20:39246000-39246500->cyp39a1	Act	0.322273	0.357491	0
gli3	M01704	chr20:39322808-39323308	cyp39a1	0.133153	Inter	0.235809	gli3->chr20:39322808-39323308->cyp39a1	Act	0.322273	0.357491	1.79944
vax2	M03186_2.00	chr20:6755947-6756447	igfbp3	0.13708	Body	0.235682	vax2->chr20:6755947-6756447->igfbp3	Act	0.653235	0.316956	0
vax2	M03128_2.00	chr20:6771552-6772052	igfbp3	0.13708	Body	0.235682	vax2->chr20:6771552-6772052->igfbp3	Act	0.653235	0.316956	0.649754
vax2	M06500_2.00	chr20:6773474-6773974	igfbp3	0.110328	Body	0.235682	vax2->chr20:6773474-6773974->igfbp3	Act	0.653235	0.316956	0
vax2	M06324_2.00	chr20:6774927-6775427	igfbp3	0.108243	Body	0.235682	vax2->chr20:6774927-6775427->igfbp3	Act	0.653235	0.316956	0
vax2	M06482_2.00	chr20:6783925-6784425	igfbp3	0.133353	Body	0.235682	vax2->chr20:6783925-6784425->igfbp3	Act	0.653235	0.316956	1.35119
vax2	M05224_2.00	chr20:6791331-6791831	igfbp3	0.0896424	Body	0.235682	vax2->chr20:6791331-6791831->igfbp3	Act	0.653235	0.316956	0
vax2	M05224_2.00	chr20:6791868-6792368	igfbp3	0.0896424	Body	0.235682	vax2->chr20:6791868-6792368->igfbp3	Act	0.653235	0.316956	0
vax2	M06500_2.00	chr20:6909249-6909749	igfbp3	0.110328	Inter	0.235682	vax2->chr20:6909249-6909749->igfbp3	Act	0.653235	0.316956	0
stat2	M09733	chr9:21418764-21419264	BX649266.1	0.236789	Inter	0.235342	stat2->chr9:21418764-21419264->BX649266.1	Act	1.0573	0.560956	0
gli3	M01596	chr25:30298109-30298609	C25H11orf96	0.108651	Body	0.234926	gli3->chr25:30298109-30298609->C25H11orf96	Act	0.322273	0.542054	0
gli3	M01657	chr25:30298638-30299138	C25H11orf96	0.0998304	Body	0.234926	gli3->chr25:30298638-30299138->C25H11orf96	Act	0.322273	0.542054	0
gli3	M01596	chr25:30308796-30309296	C25H11orf96	0.108651	Inter	0.234926	gli3->chr25:30308796-30309296->C25H11orf96	Act	0.322273	0.542054	0
stat1a	M09713	chr9:561300-561800	CU984600.2	0.150431	Inter	0.234629	stat1a->chr9:561300-561800->CU984600.2	Act	0.457721	1.13061	0.785112
hmga1a	M01676_2.00	chr9:33535558-33536058	rpl8	0.0615374	Inter	0.232974	hmga1a->chr9:33535558-33536058->rpl8	Act	0.360252	0.683521	1.82275
gli3	M07292	chr21:42926679-42927179	p4ha2	0.0927551	Inter	0.232427	gli3->chr21:42926679-42927179->p4ha2	Act	0.322273	0.26589	0
hlfa	M04245_2.00	chr3:18170175-18170675	tob1a	0.284301	Inter	0.231241	hlfa->chr3:18170175-18170675->tob1a	Act	0.293109	0.592458	0
gli3	M01657	chr7:24362560-24363060	txn	0.0998304	Body	0.230697	gli3->chr7:24362560-24363060->txn	Act	0.322273	0.518325	0
hmga1a	M01689_2.00	chr23:35713242-35713742	tuba1b	0.0766518	Body	0.229738	hmga1a->chr23:35713242-35713742->tuba1b	Act	0.360252	0.407936	0
hmga1a	M01691_2.00	chr23:35696055-35696555	tuba1b	0.126671	Inter	0.229738	hmga1a->chr23:35696055-35696555->tuba1b	Act	0.360252	0.407936	0
stat1b	M00492	chr1:11825466-11825966	ttyh3b	0.108941	Body	0.229521	stat1b->chr1:11825466-11825966->ttyh3b	Act	1.06852	0.376288	0
stat1b	M09713	chr1:11831782-11832282	ttyh3b	0.233498	Body	0.229521	stat1b->chr1:11831782-11832282->ttyh3b	Act	1.06852	0.376288	0
stat1b	M09713	chr1:11832304-11832804	ttyh3b	0.233498	Body	0.229521	stat1b->chr1:11832304-11832804->ttyh3b	Act	1.06852	0.376288	0.476783
hmga1a	M01691_2.00	chr19:48155773-48156273	rpl14	0.126671	Inter	0.229334	hmga1a->chr19:48155773-48156273->rpl14	Act	0.360252	1.08786	0
hmga1a	M02652_2.00	chr19:48160052-48160552	rpl14	0.0734655	Inter	0.229334	hmga1a->chr19:48160052-48160552->rpl14	Act	0.360252	1.08786	0
atoh7	M04193_2.00	chr20:29933215-29933715	sox11b	0.110001	Inter	0.229136	atoh7->chr20:29933215-29933715->sox11b	Act	0.554258	0.594402	0
hmga1a	M01676_2.00	chr20:51197489-51197989	hsp90ab1	0.0615374	TSS	0.22855	hmga1a->chr20:51197489-51197989->hsp90ab1	Act	0.360252	0.714539	0
hmga1a	M01106_2.00	chr20:51198197-51198697	hsp90ab1	0.150625	TSS	0.22855	hmga1a->chr20:51198197-51198697->hsp90ab1	Act	0.360252	0.714539	0
gli3	M07292	chr6:39356071-39356571	stat2	0.0927551	Inter	0.227577	gli3->chr6:39356071-39356571->stat2	Act	0.322273	1.0573	0
gli3	M01596	chr16:4446215-4446715	vegfaa	0.108651	Inter	0.226459	gli3->chr16:4446215-4446715->vegfaa	Act	0.322273	0.742137	0
gli3	M01596	chr16:4446736-4447236	vegfaa	0.108651	Inter	0.226459	gli3->chr16:4446736-4447236->vegfaa	Act	0.322273	0.742137	0
gli3	M01596	chr16:4491371-4491871	vegfaa	0.108651	Inter	0.226459	gli3->chr16:4491371-4491871->vegfaa	Act	0.322273	0.742137	1.44771
stat1b	M01260	chr3:44059799-44060299	il4r.1	0.12411	Body	0.226331	stat1b->chr3:44059799-44060299->il4r.1	Act	1.06852	0.305552	0
stat1b	M00496	chr1:49225608-49226108	cxcl18b	0.08179	Body	0.224888	stat1b->chr1:49225608-49226108->cxcl18b	Act	1.06852	0.581435	0
stat1b	M00496	chr1:49243754-49244254	cxcl18b	0.08179	Inter	0.224888	stat1b->chr1:49243754-49244254->cxcl18b	Act	1.06852	0.581435	0
stat1b	M00492	chr1:49412187-49412687	cxcl18b	0.108941	Inter	0.224888	stat1b->chr1:49412187-49412687->cxcl18b	Act	1.06852	0.581435	0
hlfa	M00260	chr24:13421676-13422176	rdh10a	0.254499	Inter	0.224731	hlfa->chr24:13421676-13422176->rdh10a	Act	0.293109	0.813543	1.66936
hmga1a	M01691_2.00	chr24:21598118-21598618	rpl21	0.126671	Inter	0.223185	hmga1a->chr24:21598118-21598618->rpl21	Act	0.360252	0.548757	1.03175
hmga1a	M02652_2.00	chr24:21598843-21599343	rpl21	0.0734655	Inter	0.223185	hmga1a->chr24:21598843-21599343->rpl21	Act	0.360252	0.548757	0
gli3	M01596	chr9:41428474-41428974	stat1b	0.108651	Inter	0.223143	gli3->chr9:41428474-41428974->stat1b	Act	0.322273	1.06852	2.85784
gli3	M01657	chr9:41433125-41433625	stat1b	0.0998304	Inter	0.223143	gli3->chr9:41433125-41433625->stat1b	Act	0.322273	1.06852	0
hmga1a	M01689_2.00	chr4:17352915-17353415	parpbp	0.0766518	Body	0.222272	hmga1a->chr4:17352915-17353415->parpbp	Act	0.360252	0.386887	0
hmga1a	M01106_2.00	chr4:17150528-17151028	parpbp	0.150625	Inter	0.222272	hmga1a->chr4:17150528-17151028->parpbp	Act	0.360252	0.386887	0
hmga1a	M01106_2.00	chr4:17151122-17151622	parpbp	0.150625	Inter	0.222272	hmga1a->chr4:17151122-17151622->parpbp	Act	0.360252	0.386887	0
hmga1a	M01676_2.00	chr4:17163425-17163925	parpbp	0.0615374	Inter	0.222272	hmga1a->chr4:17163425-17163925->parpbp	Act	0.360252	0.386887	0
hmga1a	M01689_2.00	chr4:17353466-17353966	parpbp	0.0766518	TSS	0.222272	hmga1a->chr4:17353466-17353966->parpbp	Act	0.360252	0.386887	0
gli3	M02876_2.00	chr19:6911459-6911959	tapbp.1	0.319182	Inter	0.222062	gli3->chr19:6911459-6911959->tapbp.1	Act	0.322273	0.443677	0.529804
stat1b	M00496	chr15:40768376-40768876	fat3a	0.08179	Body	0.221968	stat1b->chr15:40768376-40768876->fat3a	Act	1.06852	0.29836	0
stat1b	M00223	chr6:49429203-49429703	apcdd1l	0.0978778	Inter	0.221291	stat1b->chr6:49429203-49429703->apcdd1l	Act	1.06852	0.4186	0
stat1b	M01823	chr6:49805076-49805576	apcdd1l	0.0995306	Inter	0.221291	stat1b->chr6:49805076-49805576->apcdd1l	Act	1.06852	0.4186	0
stat2	M09733	chr19:7150942-7151442	tapbp.1	0.236789	Inter	0.218816	stat2->chr19:7150942-7151442->tapbp.1	Act	1.0573	0.443677	0
stat1b	M01212	chr22:12798222-12798722	stat1a	0.0849029	TSS	0.216236	stat1b->chr22:12798222-12798722->stat1a	Act	1.06852	0.457721	0.395275
stat1a	M01212	chr9:41218553-41219053	stat1b	0.0800541	Body	0.216236	stat1a->chr9:41218553-41219053->stat1b	Act	0.457721	1.06852	1.59911
stat1a	M01212	chr9:41433125-41433625	stat1b	0.0800541	Inter	0.216236	stat1a->chr9:41433125-41433625->stat1b	Act	0.457721	1.06852	0
stat1b	M00496	chr5:44984338-44984838	dmrt1	0.08179	Body	0.216043	stat1b->chr5:44984338-44984838->dmrt1	Act	1.06852	0.400819	0
hmga1a	M01676_2.00	chr16:23999623-24000123	rps19	0.0615374	Inter	0.215731	hmga1a->chr16:23999623-24000123->rps19	Act	0.360252	0.723296	1.22778
hmga1a	M02652_2.00	chr16:24063565-24064065	rps19	0.0734655	Inter	0.215731	hmga1a->chr16:24063565-24064065->rps19	Act	0.360252	0.723296	3.5207
sox11b	M05305	chr16:31921776-31922276	rps9	0.0535237	TSS	0.214874	sox11b->chr16:31921776-31922276->rps9	Act	0.594402	1.11598	0.310203
sox11b	M05305	chr16:31922297-31922797	rps9	0.0535237	TSS	0.214874	sox11b->chr16:31922297-31922797->rps9	Act	0.594402	1.11598	0
epas1b	M09906	chr11:28329894-28330394	ephb2b	0.177594	Body	0.214643	epas1b->chr11:28329894-28330394->ephb2b	Act	0.446675	0.287507	0
gli3	M01657	chr16:23430914-23431414	icn	0.0998304	Body	0.213559	gli3->chr16:23430914-23431414->icn	Act	0.322273	1.13631	0.470674
gli3	M01657	chr16:23401108-23401608	icn	0.0998304	Inter	0.213559	gli3->chr16:23401108-23401608->icn	Act	0.322273	1.13631	0
stat1a	M01823	chr13:37630575-37631075	ifi46	0.0683403	Body	0.213259	stat1a->chr13:37630575-37631075->ifi46	Act	0.457721	0.703488	0
hmga1a	M01105_2.00	chr24:26479571-26480071	rpl22l1	0.0687208	TSS	0.213202	hmga1a->chr24:26479571-26480071->rpl22l1	Act	0.360252	0.528836	0
hmga1a	M01010	chr12:10365722-10366222	ndc80	0.109135	Body	0.213116	hmga1a->chr12:10365722-10366222->ndc80	Act	0.360252	0.469151	0
stat1b	M01212	chr14:3509589-3510089	gstp1	0.0849029	Body	0.21082	stat1b->chr14:3509589-3510089->gstp1	Act	1.06852	0.329774	0.74543
stat2	M09733	chr6:49673206-49673706	apcdd1l	0.236789	Body	0.209267	stat2->chr6:49673206-49673706->apcdd1l	Act	1.0573	0.4186	0
stat2	M00223	chr6:49429203-49429703	apcdd1l	0.117861	Inter	0.209267	stat2->chr6:49429203-49429703->apcdd1l	Act	1.0573	0.4186	0
gli3	M08023_2.00	chr20:14925095-14925595	dnm3a	0.0723493	Body	0.20828	gli3->chr20:14925095-14925595->dnm3a	Act	0.322273	0.420488	0
hmga1a	M01676_2.00	chr14:6946348-6946848	rack1	0.0615374	TSS	0.20787	hmga1a->chr14:6946348-6946848->rack1	Act	0.360252	0.5751	0
dmrt1	M01146	chr16:33114449-33114949	prss35	0.0981202	Inter	0.207393	dmrt1->chr16:33114449-33114949->prss35	Act	0.400819	0.251468	2.52127
hlfa	M01803_2.00	chr14:7141355-7141855	ctsf	0.258915	TSS	0.206897	hlfa->chr14:7141355-7141855->ctsf	Act	0.293109	0.61554	0
hmga1a	M01106_2.00	chr3:16229145-16229645	rpl19	0.150625	TSS	0.206881	hmga1a->chr3:16229145-16229645->rpl19	Act	0.360252	1.27095	0
hmga1a	M01106_2.00	chr3:16229663-16230163	rpl19	0.150625	TSS	0.206881	hmga1a->chr3:16229663-16230163->rpl19	Act	0.360252	1.27095	0.256608
hmga1a	M01691_2.00	chr3:16230233-16230733	rpl19	0.126671	TSS	0.206881	hmga1a->chr3:16230233-16230733->rpl19	Act	0.360252	1.27095	1.16562
hmga1a	M01010	chr15:31516352-31516852	hmgb1b	0.109135	Body	0.20574	hmga1a->chr15:31516352-31516852->hmgb1b	Act	0.360252	0.476514	0
hmga1a	M01676_2.00	chr16:23999623-24000123	rps27.2	0.0615374	Inter	0.205453	hmga1a->chr16:23999623-24000123->rps27.2	Act	0.360252	0.446049	1.22778
stat1b	M01260	chr10:9145137-9145637	fstb	0.12411	Inter	0.205396	stat1b->chr10:9145137-9145637->fstb	Act	1.06852	0.69435	0
stat1b	M09713	chr10:9153093-9153593	fstb	0.233498	Inter	0.205396	stat1b->chr10:9153093-9153593->fstb	Act	1.06852	0.69435	0
stat1b	M01212	chr10:9154809-9155309	fstb	0.0849029	Inter	0.205396	stat1b->chr10:9154809-9155309->fstb	Act	1.06852	0.69435	0
hmga1a	M01688_2.00	chr23:36306242-36306742	hnrnpa1b	0.159017	Body	0.204041	hmga1a->chr23:36306242-36306742->hnrnpa1b	Act	0.360252	0.426506	0
hmga1a	M01105_2.00	chr23:36306895-36307395	hnrnpa1b	0.0687208	Body	0.204041	hmga1a->chr23:36306895-36307395->hnrnpa1b	Act	0.360252	0.426506	0
hmga1a	M01105_2.00	chr23:36463567-36464067	hnrnpa1b	0.0687208	Inter	0.204041	hmga1a->chr23:36463567-36464067->hnrnpa1b	Act	0.360252	0.426506	0
hmga1a	M01010	chr19:11238446-11238946	ssr2	0.109135	TSS	0.203831	hmga1a->chr19:11238446-11238946->ssr2	Act	0.360252	0.357287	0
sox11b	M05898_2.00	chr4:16135511-16136011	atp2b1a	0.0534916	Inter	0.201621	sox11b->chr4:16135511-16136011->atp2b1a	Act	0.594402	0.552862	0
sox11b	M00199_2.00	chr4:16281210-16281710	atp2b1a	0.0791715	Inter	0.201621	sox11b->chr4:16281210-16281710->atp2b1a	Act	0.594402	0.552862	0
stat2	M09733	chr1:49225608-49226108	cxcl18b	0.236789	Body	0.201308	stat2->chr1:49225608-49226108->cxcl18b	Act	1.0573	0.581435	0
stat2	M09733	chr1:49243754-49244254	cxcl18b	0.236789	Inter	0.201308	stat2->chr1:49243754-49244254->cxcl18b	Act	1.0573	0.581435	0
gli3	M08023_2.00	chr5:16718944-16719444	htr7c	0.0723493	Inter	0.200705	gli3->chr5:16718944-16719444->htr7c	Act	0.322273	0.368924	3.2983
sox11b	M00710_2.00	chr14:26702426-26702926	eef1g	0.0519373	Inter	0.200217	sox11b->chr14:26702426-26702926->eef1g	Act	0.594402	0.378223	0
sox11b	M08042_2.00	chr14:26706941-26707441	eef1g	0.0515707	Inter	0.200217	sox11b->chr14:26706941-26707441->eef1g	Act	0.594402	0.378223	3.37461
hlfa	M04212	chr20:34303804-34304304	ptgs2b	0.280394	Inter	0.2001	hlfa->chr20:34303804-34304304->ptgs2b	Act	0.293109	1.27239	0
hlfa	M00260	chr20:34346564-34347064	ptgs2b	0.254499	Inter	0.2001	hlfa->chr20:34346564-34347064->ptgs2b	Act	0.293109	1.27239	0
stat2	M09733	chr13:899072-899572	rn7sk	0.236789	Inter	0.197512	stat2->chr13:899072-899572->rn7sk	Act	1.0573	0.378818	3.50067
gli3	M08875_2.00	chr4:6797106-6797606	gpr85	0.128862	Inter	0.197362	gli3->chr4:6797106-6797606->gpr85	Act	0.322273	0.677528	0
gli3	M01657	chr8:26935505-26936005	slc16a1b	0.0998304	Body	0.197276	gli3->chr8:26935505-26936005->slc16a1b	Act	0.322273	0.318721	1.55381
gli3	M02732_2.00	chr8:26961541-26962041	slc16a1b	0.0586833	Body	0.197276	gli3->chr8:26961541-26962041->slc16a1b	Act	0.322273	0.318721	0
gli3	M08875_2.00	chr8:26690716-26691216	slc16a1b	0.128862	Inter	0.197276	gli3->chr8:26690716-26691216->slc16a1b	Act	0.322273	0.318721	0.970231
gli3	M01657	chr8:26964108-26964608	slc16a1b	0.0998304	Inter	0.197276	gli3->chr8:26964108-26964608->slc16a1b	Act	0.322273	0.318721	0
gli3	M01596	chr21:37554447-37554947	pgrmc1	0.108651	Inter	0.196844	gli3->chr21:37554447-37554947->pgrmc1	Act	0.322273	0.477773	0
gli3	M02641_2.00	chr21:37621619-37622119	pgrmc1	0.165727	Inter	0.196844	gli3->chr21:37621619-37622119->pgrmc1	Act	0.322273	0.477773	1.35383
gli3	M02876_2.00	chr21:37626694-37627194	pgrmc1	0.319182	Inter	0.196844	gli3->chr21:37626694-37627194->pgrmc1	Act	0.322273	0.477773	0.85228
gli3	M01596	chr21:37435990-37436490	pgrmc1	0.108651	TSS	0.196844	gli3->chr21:37435990-37436490->pgrmc1	Act	0.322273	0.477773	0
atoh7	M04193_2.00	chr17:44377800-44378300	otx2b	0.110001	Inter	0.196196	atoh7->chr17:44377800-44378300->otx2b	Act	0.554258	0.721832	0
gli3	M08023_2.00	chr19:47872800-47873300	nme2b.1	0.0723493	Inter	0.195998	gli3->chr19:47872800-47873300->nme2b.1	Act	0.322273	1.13355	1.87727
gli3	M08023_2.00	chr19:47974008-47974508	nme2b.1	0.0723493	Inter	0.195998	gli3->chr19:47974008-47974508->nme2b.1	Act	0.322273	1.13355	0
gli3	M08023_2.00	chr19:47989362-47989862	nme2b.1	0.0723493	Inter	0.195998	gli3->chr19:47989362-47989862->nme2b.1	Act	0.322273	1.13355	0
gli3	M01596	chr19:48117482-48117982	nme2b.1	0.108651	TSS	0.195998	gli3->chr19:48117482-48117982->nme2b.1	Act	0.322273	1.13355	0
epas1b	M09906	chr17:9929928-9930428	egln3	0.177594	Body	0.193606	epas1b->chr17:9929928-9930428->egln3	Act	0.446675	0.483182	0
gli3	M02641_2.00	chr20:25551740-25552240	cyp2ad3	0.165727	TSS	0.193575	gli3->chr20:25551740-25552240->cyp2ad3	Act	0.322273	0.598298	0.925882
epas1b	M09906	chr7:32719078-32719578	pkp3b	0.177594	Inter	0.19334	epas1b->chr7:32719078-32719578->pkp3b	Act	0.446675	0.42544	0
gli3	M02876_2.00	chr3:36003388-36003888	scpep1	0.319182	Inter	0.192728	gli3->chr3:36003388-36003888->scpep1	Act	0.322273	0.335593	0.750694
gli3	M08023_2.00	chr3:36003980-36004480	scpep1	0.0723493	Inter	0.192728	gli3->chr3:36003980-36004480->scpep1	Act	0.322273	0.335593	0.446023
stat2	M10080	chr25:17556311-17556811	galnt18a	0.239518	Inter	0.192176	stat2->chr25:17556311-17556811->galnt18a	Act	1.0573	0.694213	0
sox11b	M05305	chr3:18179876-18180376	rps2	0.0535237	Inter	0.192151	sox11b->chr3:18179876-18180376->rps2	Act	0.594402	0.870983	0
sox11b	M00710_2.00	chr3:18263283-18263783	rps2	0.0519373	Inter	0.192151	sox11b->chr3:18263283-18263783->rps2	Act	0.594402	0.870983	0
stat2	M09733	chr22:12798222-12798722	stat1a	0.236789	TSS	0.190779	stat2->chr22:12798222-12798722->stat1a	Act	1.0573	0.457721	0.395275
epas1b	M09906	chr13:23017303-23017803	sorbs1	0.177594	Inter	0.190553	epas1b->chr13:23017303-23017803->sorbs1	Act	0.446675	0.254193	0
hlfa	M10258	chr21:36577973-36578473	BX936439.1	0.290723	Inter	0.189687	hlfa->chr21:36577973-36578473->BX936439.1	Act	0.293109	0.335379	1.5542
sox11b	M00199_2.00	chr2:26498871-26499371	rps8a	0.0791715	TSS	0.188371	sox11b->chr2:26498871-26499371->rps8a	Act	0.594402	0.870511	0
gli3	M01657	chr13:37464341-37464841	ifi46	0.0998304	Inter	0.187392	gli3->chr13:37464341-37464841->ifi46	Act	0.322273	0.703488	0
hmga1a	M01689_2.00	chr16:54829018-54829518	pabpc1a	0.0766518	TSS	0.187005	hmga1a->chr16:54829018-54829518->pabpc1a	Act	0.360252	0.621446	0
tfap2d	M02761_2.00	chr14:46165983-46166483	ccna2	0.112764	Inter	0.186598	tfap2d->chr14:46165983-46166483->ccna2	Act	0.370704	0.422018	0
gli3	M02876_2.00	chr13:20260015-20260515	AL954359.2	0.319182	Inter	0.185816	gli3->chr13:20260015-20260515->AL954359.2	Act	0.322273	0.358845	3.80485
stat1a	M09713	chr5:44805068-44805568	ctsla	0.150431	Body	0.183821	stat1a->chr5:44805068-44805568->ctsla	Act	0.457721	0.551842	0
stat1a	M09713	chr16:23229782-23230282	icn	0.150431	Inter	0.18359	stat1a->chr16:23229782-23230282->icn	Act	0.457721	1.13631	0
sox11b	M08042_2.00	chr3:29869713-29870213	rpl3	0.0515707	Body	0.183587	sox11b->chr3:29869713-29870213->rpl3	Act	0.594402	0.596649	0
sox11b	M08042_2.00	chr3:29869170-29869670	rpl3	0.0515707	TSS	0.183587	sox11b->chr3:29869170-29869670->rpl3	Act	0.594402	0.596649	0
hmga1a	M02652_2.00	chr14:33333803-33334303	rpl39	0.0734655	Body	0.183528	hmga1a->chr14:33333803-33334303->rpl39	Act	0.360252	1.0606	0
hmga1a	M01691_2.00	chr14:6962922-6963422	hnrnpaba	0.126671	TSS	0.183279	hmga1a->chr14:6962922-6963422->hnrnpaba	Act	0.360252	0.491247	0
gli3	M01657	chr25:17874471-17874971	galnt18a	0.0998304	Inter	0.183222	gli3->chr25:17874471-17874971->galnt18a	Act	0.322273	0.694213	0
hmga1a	M01105_2.00	chr2:24506925-24507425	rps28	0.0687208	TSS	0.182934	hmga1a->chr2:24506925-24507425->rps28	Act	0.360252	0.635572	0
sox11b	M05898_2.00	chr23:31432204-31432704	rps12	0.0534916	Body	0.181084	sox11b->chr23:31432204-31432704->rps12	Act	0.594402	0.702248	0
sox11b	M08042_2.00	chr23:31431692-31432192	rps12	0.0515707	TSS	0.181084	sox11b->chr23:31431692-31432192->rps12	Act	0.594402	0.702248	0
gli3	M02732_2.00	chr16:46619048-46619548	tmem176l.3a	0.0586833	TSS	0.179805	gli3->chr16:46619048-46619548->tmem176l.3a	Act	0.322273	0.389072	0
sox11b	M00710_2.00	chr23:19474257-19474757	rpl10	0.0519373	Inter	0.178722	sox11b->chr23:19474257-19474757->rpl10	Act	0.594402	1.11854	0
gli3	M01596	chr18:26573696-26574196	ctsh	0.108651	Inter	0.178321	gli3->chr18:26573696-26574196->ctsh	Act	0.322273	0.301167	0
gli3	M08023_2.00	chr18:26629214-26629714	ctsh	0.0723493	Inter	0.178321	gli3->chr18:26629214-26629714->ctsh	Act	0.322273	0.301167	0
sox11b	M05305	chr20:51198924-51199424	hsp90ab1	0.0535237	TSS	0.178083	sox11b->chr20:51198924-51199424->hsp90ab1	Act	0.594402	0.714539	1.88482
gli3	M02732_2.00	chr17:9919289-9919789	egln3	0.0586833	Body	0.177009	gli3->chr17:9919289-9919789->egln3	Act	0.322273	0.483182	0
hmga1a	M01676_2.00	chr7:19559082-19559582	snrpf	0.0615374	Inter	0.176327	hmga1a->chr7:19559082-19559582->snrpf	Act	0.360252	0.456933	1.11258
hlfa	M10258	chr11:39958752-39959252	per3	0.290723	Body	0.17618	hlfa->chr11:39958752-39959252->per3	Act	0.293109	1.13246	0
hlfa	M00260	chr11:39936608-39937108	per3	0.254499	Inter	0.17618	hlfa->chr11:39936608-39937108->per3	Act	0.293109	1.13246	1.18188
hlfa	M00260	chr11:39945471-39945971	per3	0.254499	Inter	0.17618	hlfa->chr11:39945471-39945971->per3	Act	0.293109	1.13246	0
gli3	M08875_2.00	chr19:41537147-41537647	tinagl1	0.128862	Inter	0.175797	gli3->chr19:41537147-41537647->tinagl1	Act	0.322273	0.308486	0
gli3	M01704	chr19:41575173-41575673	tinagl1	0.133153	Inter	0.175797	gli3->chr19:41575173-41575673->tinagl1	Act	0.322273	0.308486	0
sox11b	M05898_2.00	chr1:44843565-44844065	rps6	0.0534916	Inter	0.17559	sox11b->chr1:44843565-44844065->rps6	Act	0.594402	0.785944	0
hmga1a	M01105_2.00	chr11:1400382-1400882	rpl29	0.0687208	TSS	0.175091	hmga1a->chr11:1400382-1400882->rpl29	Act	0.360252	1.1093	0
hmga1a	M01676_2.00	chr8:46920555-46921055	ybx1	0.0615374	Inter	0.174522	hmga1a->chr8:46920555-46921055->ybx1	Act	0.360252	0.458135	0
hmga1a	M01106_2.00	chr8:46927060-46927560	ybx1	0.150625	Inter	0.174522	hmga1a->chr8:46927060-46927560->ybx1	Act	0.360252	0.458135	0
hmga1a	M01106_2.00	chr8:46927563-46928063	ybx1	0.150625	Inter	0.174522	hmga1a->chr8:46927563-46928063->ybx1	Act	0.360252	0.458135	0
hmga1a	M01689_2.00	chr8:46935631-46936131	ybx1	0.0766518	Inter	0.174522	hmga1a->chr8:46935631-46936131->ybx1	Act	0.360252	0.458135	3.88481
stat1a	M00492	chr7:43706215-43706715	BX005396.2	0.0927953	Inter	0.173374	stat1a->chr7:43706215-43706715->BX005396.2	Act	0.457721	0.382386	0
stat1a	M09713	chr7:43780523-43781023	BX005396.2	0.150431	Inter	0.173374	stat1a->chr7:43780523-43781023->BX005396.2	Act	0.457721	0.382386	0
stat2	M09733	chr16:23955275-23955775	nbn	0.236789	Body	0.172627	stat2->chr16:23955275-23955775->nbn	Act	1.0573	1.13562	2.5182
stat2	M09733	chr16:23961327-23961827	nbn	0.236789	Body	0.172627	stat2->chr16:23961327-23961827->nbn	Act	1.0573	1.13562	0
vax2	M05143_2.00	chr23:21434255-21434755	her4.1	0.0911311	Inter	0.172466	vax2->chr23:21434255-21434755->her4.1	Act	0.653235	0.272485	0
vax2	M03158_2.00	chr23:21450436-21450936	her4.1	0.106827	Inter	0.172466	vax2->chr23:21450436-21450936->her4.1	Act	0.653235	0.272485	0
vax2	M00413_2.00	chr23:21450951-21451451	her4.1	0.0631805	Inter	0.172466	vax2->chr23:21450951-21451451->her4.1	Act	0.653235	0.272485	0
vax2	M05143_2.00	chr23:21471609-21472109	her4.1	0.0911311	Inter	0.172466	vax2->chr23:21471609-21472109->her4.1	Act	0.653235	0.272485	0
hmga1a	M01691_2.00	chr6:57723979-57724479	snrpb	0.126671	Inter	0.172312	hmga1a->chr6:57723979-57724479->snrpb	Act	0.360252	0.505925	0
hmga1a	M02652_2.00	chr6:57726938-57727438	snrpb	0.0734655	Inter	0.172312	hmga1a->chr6:57726938-57727438->snrpb	Act	0.360252	0.505925	0
hmga1a	M01689_2.00	chr6:57484583-57485083	snrpb	0.0766518	TSS	0.172312	hmga1a->chr6:57484583-57485083->snrpb	Act	0.360252	0.505925	0
hmga1a	M02652_2.00	chr2:22363172-22363672	selenof	0.0734655	TSS	0.171952	hmga1a->chr2:22363172-22363672->selenof	Act	0.360252	0.288175	0
hmga1a	M02652_2.00	chr2:22363723-22364223	selenof	0.0734655	TSS	0.171952	hmga1a->chr2:22363723-22364223->selenof	Act	0.360252	0.288175	0
gli3	M02643_2.00	chr11:41975757-41976257	her15.2	0.121256	Inter	0.171746	gli3->chr11:41975757-41976257->her15.2	Act	0.322273	0.725268	0
hlfa	M08786_2.00	chr25:17238109-17238609	ccnd2a	0.25329	TSS	0.171743	hlfa->chr25:17238109-17238609->ccnd2a	Act	0.293109	0.34613	0
stat1b	M09713	chr16:23955275-23955775	nbn	0.233498	Body	0.171391	stat1b->chr16:23955275-23955775->nbn	Act	1.06852	1.13562	2.5182
stat2	M10080	chr16:39467263-39467763	osbpl10b	0.239518	Inter	0.171029	stat2->chr16:39467263-39467763->osbpl10b	Act	1.0573	0.36798	0
gli3	M02732_2.00	chr20:32209825-32210325	sesn1	0.0586833	Body	0.169546	gli3->chr20:32209825-32210325->sesn1	Act	0.322273	0.287437	0
gli3	M01596	chr20:31951460-31951960	sesn1	0.108651	Inter	0.169546	gli3->chr20:31951460-31951960->sesn1	Act	0.322273	0.287437	0
stat1a	M09713	chr3:17473835-17474335	dhx58	0.150431	Inter	0.168757	stat1a->chr3:17473835-17474335->dhx58	Act	0.457721	0.513818	0
hmga1a	M01010	chr16:4770268-4770768	rpa2	0.109135	TSS	0.168633	hmga1a->chr16:4770268-4770768->rpa2	Act	0.360252	0.498714	0
gli3	M01657	chr23:35954439-35954939	tuba1b	0.0998304	Inter	0.16694	gli3->chr23:35954439-35954939->tuba1b	Act	0.322273	0.407936	1.71651
stat1a	M00224	chr13:37608162-37608662	ifi45	0.0714853	TSS	0.166836	stat1a->chr13:37608162-37608662->ifi45	Act	0.457721	0.530607	2.31578
stat1a	M00492	chr8:50738409-50738909	b2ml	0.0927953	Inter	0.166632	stat1a->chr8:50738409-50738909->b2ml	Act	0.457721	0.579854	0
sox11b	M08042_2.00	chr19:17385285-17385785	rpl15	0.0515707	TSS	0.16597	sox11b->chr19:17385285-17385785->rpl15	Act	0.594402	0.472045	0
sox11b	M08042_2.00	chr19:17385895-17386395	rpl15	0.0515707	TSS	0.16597	sox11b->chr19:17385895-17386395->rpl15	Act	0.594402	0.472045	0
sox11b	M00710_2.00	chr2:30182705-30183205	rpl7	0.0519373	TSS	0.165879	sox11b->chr2:30182705-30183205->rpl7	Act	0.594402	1.00764	0
hmga1a	M01676_2.00	chr17:15535188-15535688	marcksb	0.0615374	TSS	0.16501	hmga1a->chr17:15535188-15535688->marcksb	Act	0.360252	0.532639	0
gli3	M01596	chr16:24501189-24501689	pon2	0.108651	Inter	0.164669	gli3->chr16:24501189-24501689->pon2	Act	0.322273	0.254504	0
gli3	M01596	chr16:24671900-24672400	pon2	0.108651	TSS	0.164669	gli3->chr16:24671900-24672400->pon2	Act	0.322273	0.254504	0
stat1b	M00492	chr16:46489325-46489825	tmem176l.3a	0.108941	Inter	0.162538	stat1b->chr16:46489325-46489825->tmem176l.3a	Act	1.06852	0.389072	0
hmga1a	M01689_2.00	chr23:17736592-17737092	naca	0.0766518	Inter	0.161665	hmga1a->chr23:17736592-17737092->naca	Act	0.360252	0.498697	0
hmga1a	M01689_2.00	chr23:17737124-17737624	naca	0.0766518	Inter	0.161665	hmga1a->chr23:17737124-17737624->naca	Act	0.360252	0.498697	0
hmga1a	M02652_2.00	chr21:26071613-26072113	rpl23a	0.0734655	TSS	0.161082	hmga1a->chr21:26071613-26072113->rpl23a	Act	0.360252	1.2415	1.09743
hmga1a	M01689_2.00	chr11:3989364-3989864	spcs1	0.0766518	TSS	0.16046	hmga1a->chr11:3989364-3989864->spcs1	Act	0.360252	0.433394	0
hmga1a	M01010	chr7:52963322-52963822	cart3	0.109135	Body	0.160133	hmga1a->chr7:52963322-52963822->cart3	Act	0.360252	1.11612	0
sox11b	M00710_2.00	chr19:43096883-43097383	fabp3	0.0519373	Inter	0.160123	sox11b->chr19:43096883-43097383->fabp3	Act	0.594402	0.805969	0
hmga1a	M01676_2.00	chr9:48819065-48819565	spc25	0.0615374	TSS	0.160076	hmga1a->chr9:48819065-48819565->spc25	Act	0.360252	0.335569	0
gli3	M01657	chr5:32730630-32731130	rpl12	0.0998304	Inter	0.159331	gli3->chr5:32730630-32731130->rpl12	Act	0.322273	1.43813	0.437821
gli3	M08875_2.00	chr5:32771048-32771548	rpl12	0.128862	Inter	0.159331	gli3->chr5:32771048-32771548->rpl12	Act	0.322273	1.43813	0
sox11b	M05898_2.00	chr18:3232519-3233019	rps3	0.0534916	Inter	0.158753	sox11b->chr18:3232519-3233019->rps3	Act	0.594402	0.917228	0
sox11b	M08042_2.00	chr20:30167053-30167553	rps7	0.0515707	Inter	0.157968	sox11b->chr20:30167053-30167553->rps7	Act	0.594402	0.706057	0.294831
sox11b	M08042_2.00	chr20:30376339-30376839	rps7	0.0515707	TSS	0.157968	sox11b->chr20:30376339-30376839->rps7	Act	0.594402	0.706057	1.06668
hmga1a	M01676_2.00	chr7:33182393-33182893	anp32a	0.0615374	Inter	0.157906	hmga1a->chr7:33182393-33182893->anp32a	Act	0.360252	0.354876	0
hmga1a	M01676_2.00	chr7:33504173-33504673	anp32a	0.0615374	Inter	0.157906	hmga1a->chr7:33504173-33504673->anp32a	Act	0.360252	0.354876	0
stat1a	M09713	chr9:21418764-21419264	BX649266.1	0.150431	Inter	0.156374	stat1a->chr9:21418764-21419264->BX649266.1	Act	0.457721	0.560956	0
gli3	M08023_2.00	chr21:30503925-30504425	slc7a3a	0.0723493	Body	0.155249	gli3->chr21:30503925-30504425->slc7a3a	Act	0.322273	0.345134	0
hmga1a	M01691_2.00	chr1:23043545-23044045	rpl9	0.126671	Inter	0.154045	hmga1a->chr1:23043545-23044045->rpl9	Act	0.360252	0.716635	0.987486
sox11b	M05305	chr7:27044333-27044833	rps13	0.0535237	Inter	0.153916	sox11b->chr7:27044333-27044833->rps13	Act	0.594402	1.00523	0
sox11b	M05305	chr7:27041086-27041586	rps13	0.0535237	TSS	0.153916	sox11b->chr7:27041086-27041586->rps13	Act	0.594402	1.00523	0
sox11b	M05305	chr14:6953725-6954225	rack1	0.0535237	TSS	0.153422	sox11b->chr14:6953725-6954225->rack1	Act	0.594402	0.5751	0
sox11b	M08042_2.00	chr4:21547228-21547728	rps16	0.0515707	Inter	0.153243	sox11b->chr4:21547228-21547728->rps16	Act	0.594402	1.08279	0
gli3	M01596	chr3:18179876-18180376	rps2	0.108651	Inter	0.153238	gli3->chr3:18179876-18180376->rps2	Act	0.322273	0.870983	0
gli3	M01596	chr3:18266275-18266775	rps2	0.108651	Inter	0.153238	gli3->chr3:18266275-18266775->rps2	Act	0.322273	0.870983	0.301482
gli3	M01657	chr19:11212443-11212943	ssr2	0.0998304	Inter	0.15224	gli3->chr19:11212443-11212943->ssr2	Act	0.322273	0.357287	0
sox11b	M08042_2.00	chr9:33328647-33329147	rpl8	0.0515707	TSS	0.151769	sox11b->chr9:33328647-33329147->rpl8	Act	0.594402	0.683521	0
sox11b	M00710_2.00	chr6:7719461-7719961	rpsa	0.0519373	TSS	0.150829	sox11b->chr6:7719461-7719961->rpsa	Act	0.594402	0.632453	0
sox11b	M00710_2.00	chr6:7720097-7720597	rpsa	0.0519373	TSS	0.150829	sox11b->chr6:7720097-7720597->rpsa	Act	0.594402	0.632453	0
sox11b	M08042_2.00	chr14:6977717-6978217	hnrnpaba	0.0515707	Inter	0.150241	sox11b->chr14:6977717-6978217->hnrnpaba	Act	0.594402	0.491247	0
gli3	M01596	chr16:46492691-46493191	rpz5	0.108651	Body	0.149829	gli3->chr16:46492691-46493191->rpz5	Act	0.322273	0.331378	2.49489
sox11b	M05305	chr3:45777938-45778438	h3f3b.1	0.0535237	Body	0.14779	sox11b->chr3:45777938-45778438->h3f3b.1	Act	0.594402	1.0065	0.517752
sox11b	M05305	chr3:45778481-45778981	h3f3b.1	0.0535237	TSS	0.14779	sox11b->chr3:45778481-45778981->h3f3b.1	Act	0.594402	1.0065	0.833914
stat1b	M09713	chr16:24566432-24566932	pon2	0.233498	Inter	0.147586	stat1b->chr16:24566432-24566932->pon2	Act	1.06852	0.254504	0.723632
vax2	M05165_2.00	chr23:23299213-23299713	her9	0.137685	Inter	0.146389	vax2->chr23:23299213-23299713->her9	Act	0.653235	1.15394	0
vax2	M00507_2.00	chr23:23398883-23399383	her9	0.0617977	Inter	0.146389	vax2->chr23:23398883-23399383->her9	Act	0.653235	1.15394	0
vax2	M06500_2.00	chr23:23418819-23419319	her9	0.110328	Inter	0.146389	vax2->chr23:23418819-23419319->her9	Act	0.653235	1.15394	0
[truncated: 850 more rows]

## Sheet: tab4
geneID	ID	gene	avg_log2FC	pct.1	pct.2	p_val	p_val_adj
[truncated: 1,998 more rows]
