# Supplementary material for: Common and divergent gene regulatory networks control injury-induced and developmental neurogenesis in zebrafish retina
Source: bioRxiv preprint, doi:10.1101/2023.08.08.552451, version 1 (2023-08-08)
Supplement: Table ST6 [file 552451_file21.xlsx]

## Sheet: list
Table ST6: Genes, peaks, and motifs selectively enriched in injury vs. development samples (snRNA/ATAC-Seq+scRNA-Seq).
tab1: Common cell type specific genes between injury and development (snRNA-seq)
tab2: Common cell type specific peaks between injury and development (snATAC-seq)
tab3: Common cell type specific motifs between injury and development (snATAC-seq)
tab4: Common cell type specific genes between injury and development (scRNA-seq)
tab5: Differential MG genes between injury and development (snRNA-seq)
tab6: Differential MG peaks between injury and development (snATAC-seq)
tab7: Differential MG motifs between injury and development (snATAC-seq)
tab8: Differential MG genes between injury and development (scRNA-seq)

## Sheet: tab1
gene	injury::p_val	injury::avg_log2FC	injury::pct.1	injury::pct.2	injury::p_val_adj	injury::cluster	injury::gene_short	dev::p_val	dev::avg_log2FC	dev::pct.1	dev::pct.2	dev::p_val_adj	dev::cluster	dev::gene_short
ENSDARG00000001437~~slc2a1a	0	1.59616	0.547	0.005	0	MG	slc2a1a	0	0.621193	0.084	0.001	0	MG	slc2a1a
ENSDARG00000001634~~kirrel1a	0	1.21502	0.796	0.21	0	MG	kirrel1a	6.20713e-167	1.44092	0.4	0.093	2.01856e-162	MG	kirrel1a
ENSDARG00000001676~~gpm6bb	0	2.86212	1	0.415	0	MG	gpm6bb	0	2.90596	0.654	0.161	0	MG	gpm6bb
ENSDARG00000001733~~gulp1a	0	3.39917	0.992	0.059	0	MG	gulp1a	8.59877e-287	1.62712	0.293	0.033	2.79632e-282	MG	gulp1a
ENSDARG00000001776~~stim2b	0	1.21014	0.852	0.262	0	MG	stim2b	2.73792e-85	0.991363	0.214	0.048	8.90371e-81	MG	stim2b
ENSDARG00000001909~~vill	0	2.83147	0.866	0.054	0	MG	vill	0	0.913004	0.123	0.001	0	MG	vill
ENSDARG00000001975~~hsd11b2	0	3.57383	0.948	0.057	0	MG	hsd11b2	0	2.68175	0.389	0.035	0	MG	hsd11b2
ENSDARG00000002013~~grb10a	0	1.17004	0.576	0.104	0	MG	grb10a	4.31568e-15	0.569526	0.153	0.075	1.40346e-10	MG	grb10a
ENSDARG00000002026~~qkib	0	2.05491	0.973	0.161	0	MG	qkib	0	2.50174	0.501	0.02	0	MG	qkib
ENSDARG00000002197~~pygl	0	1.53673	0.624	0.037	0	MG	pygl	0	1.56913	0.302	0.004	0	MG	pygl
ENSDARG00000003046~~sorbs2a	0	1.91063	0.909	0.101	0	MG	sorbs2a	3.54614e-155	1.26921	0.314	0.063	1.1532e-150	MG	sorbs2a
ENSDARG00000003281~~pik3ip1	0	3.30498	0.995	0.123	0	MG	pik3ip1	2.92684e-127	1.47811	0.245	0.047	9.51808e-123	MG	pik3ip1
ENSDARG00000003512~~anks1b	0	1.40256	0.663	0.127	0	MG	anks1b	1.56284e-18	0.584847	0.131	0.054	5.08237e-14	MG	anks1b
ENSDARG00000003544~~adarb1b	2.44065e-198	0.522726	0.992	0.718	7.937e-194	MG	adarb1b	3.1697e-97	1.16725	0.662	0.326	1.03079e-92	MG	adarb1b
ENSDARG00000003754~~tspan2a	0	1.37704	0.938	0.276	0	MG	tspan2a	6.42377e-85	1.11813	0.444	0.171	2.08901e-80	MG	tspan2a
ENSDARG00000003829~~galnt2	7.52679e-152	0.506162	0.92	0.572	2.44771e-147	MG	galnt2	1.04178e-11	0.532305	0.299	0.2	3.38787e-07	MG	galnt2
ENSDARG00000004246~~slit2	0	1.61993	0.899	0.186	0	MG	slit2	2.736e-172	1.30158	0.441	0.108	8.89747e-168	MG	slit2
ENSDARG00000004372~~fmnl3	0	1.1629	0.589	0.107	0	MG	fmnl3	3.23157e-108	0.792973	0.135	0.018	1.05091e-103	MG	fmnl3
ENSDARG00000004415~~tcf7l2	0	0.841902	0.825	0.203	0	MG	tcf7l2	3.74065e-119	1.05671	0.444	0.131	1.21646e-114	MG	tcf7l2
ENSDARG00000005232~~ccdc85ca	0	1.42599	1	0.719	0	MG	ccdc85ca	0	2.29166	0.808	0.206	0	MG	ccdc85ca
ENSDARG00000005350~~dip2ba	2.11533e-207	0.6298	0.85	0.421	6.87907e-203	MG	dip2ba	1.3808e-132	1.32869	0.364	0.092	4.49037e-128	MG	dip2ba
ENSDARG00000005356~~tyro3	0	0.862567	0.362	0.064	0	MG	tyro3	6.92669e-234	1.0475	0.208	0.02	2.25256e-229	MG	tyro3
ENSDARG00000005482~~rapgef2	0	0.76006	0.995	0.686	0	MG	rapgef2	8.87272e-60	0.81938	0.632	0.357	2.88541e-55	MG	rapgef2
ENSDARG00000005574~~vsx2	0	0.876603	0.419	0.091	0	MG	vsx2	1.29593e-48	0.753442	0.197	0.061	4.21436e-44	MG	vsx2
ENSDARG00000006272~~mpp5a	0	1.3992	0.972	0.367	0	MG	mpp5a	2.15303e-112	1.20053	0.361	0.1	7.00164e-108	MG	mpp5a
ENSDARG00000006314~~itgav	0	1.33798	0.713	0.124	0	MG	itgav	6.63724e-28	0.532199	0.153	0.055	2.15843e-23	MG	itgav
ENSDARG00000006514~~her6	0	1.20669	0.536	0.075	0	MG	her6	1.70603e-108	0.840423	0.155	0.023	5.548e-104	MG	her6
ENSDARG00000006921~~lrp5	7.51203e-214	0.701235	0.558	0.21	2.44291e-209	MG	lrp5	6.5249e-31	0.692566	0.212	0.088	2.1219e-26	MG	lrp5
ENSDARG00000007098~~itm2ba	0	1.14154	0.957	0.463	0	MG	itm2ba	5.5977e-29	0.652845	0.486	0.299	1.82037e-24	MG	itm2ba
ENSDARG00000007195~~grm2b	0	2.45919	0.875	0.016	0	MG	grm2b	0	1.83742	0.32	0.007	0	MG	grm2b
ENSDARG00000007678~~ttyh3b	0	0.78373	0.976	0.566	0	MG	ttyh3b	2.04422e-142	1.41707	0.776	0.381	6.6478e-138	MG	ttyh3b
ENSDARG00000007697~~fabp7a	3.39557e-156	0.726854	0.752	0.414	1.10424e-151	MG	fabp7a	9.91198e-241	1.71422	0.997	0.869	3.22338e-236	MG	fabp7a
ENSDARG00000007711~~rab3il1	0	1.04194	0.338	0.008	0	MG	rab3il1	1.73476e-250	0.652869	0.105	0.005	5.64145e-246	MG	rab3il1
ENSDARG00000007723~~efnb1	0	1.21323	0.958	0.484	0	MG	efnb1	8.62309e-67	1.1303	0.558	0.286	2.80423e-62	MG	efnb1
ENSDARG00000007795~~cst3	2.47902e-183	0.665861	0.316	0.081	8.06178e-179	MG	cst3	2.64553e-20	0.559471	0.474	0.315	8.60328e-16	MG	cst3
ENSDARG00000007836~~ctsla	0	1.34405	0.796	0.272	0	MG	ctsla	3.81882e-88	1.33351	0.635	0.326	1.24188e-83	MG	ctsla
ENSDARG00000008363~~mcl1b	5.06569e-247	0.646201	0.207	0.021	1.64736e-242	MG	mcl1b	2.70467e-74	0.657311	0.15	0.029	8.79559e-70	MG	mcl1b
ENSDARG00000009018~~rhbg	0	3.2381	0.992	0.123	0	MG	rhbg	0	2.89951	0.411	0.006	0	MG	rhbg
ENSDARG00000009693~~llgl1	0	1.81865	0.999	0.365	0	MG	llgl1	4.10002e-234	1.67262	0.598	0.154	1.33333e-229	MG	llgl1
ENSDARG00000010008~~vim	0	1.19013	0.664	0.1	0	MG	vim	3.00791e-71	0.5223	0.098	0.014	9.78172e-67	MG	vim
ENSDARG00000010018~~qki2	0	1.67499	0.937	0.184	0	MG	qki2	0	2.07481	0.429	0.026	0	MG	qki2
ENSDARG00000010132~~dacha	0	1.94823	0.983	0.321	0	MG	dacha	0	2.93598	0.919	0.121	0	MG	dacha
ENSDARG00000010565~~aqp4	0	2.72255	0.889	0.014	0	MG	aqp4	0	1.89249	0.283	0.002	0	MG	aqp4
ENSDARG00000010752~~acsl4b	0	1.25373	0.464	0.043	0	MG	acsl4b	2.0512e-63	0.596972	0.098	0.015	6.6705e-59	MG	acsl4b
ENSDARG00000011065~~camk2b1	1.34067e-247	0.657025	0.771	0.282	4.35987e-243	MG	camk2b1	4.17856e-23	0.551753	0.323	0.177	1.35887e-18	MG	camk2b1
ENSDARG00000011163~~sema3fa	0	1.99841	0.979	0.214	0	MG	sema3fa	1.48415e-226	1.60797	0.516	0.117	4.82647e-222	MG	sema3fa
ENSDARG00000011166~~cahz	0	3.22345	0.954	0.024	0	MG	cahz	1.69174e-173	1.42635	0.268	0.042	5.50155e-169	MG	cahz
ENSDARG00000011190~~fgfr1b	0	1.26647	0.692	0.132	0	MG	fgfr1b	5.78612e-233	1.43234	0.343	0.053	1.88164e-228	MG	fgfr1b
ENSDARG00000011373~~mknk2a	3.00014e-222	0.649871	0.422	0.115	9.75646e-218	MG	mknk2a	9.45454e-80	0.811933	0.203	0.046	3.07462e-75	MG	mknk2a
ENSDARG00000011533~~sema6dl	0	1.23887	0.789	0.193	0	MG	sema6dl	4.61506e-178	1.44437	0.395	0.087	1.50082e-173	MG	sema6dl
ENSDARG00000011909~~itpr2	0	1.54496	0.613	0.025	0	MG	itpr2	8.568e-212	0.727552	0.122	0.007	2.78631e-207	MG	itpr2
ENSDARG00000012204~~CDK18	0	1.45162	0.981	0.409	0	MG	CDK18	4.9111e-16	0.581455	0.114	0.047	1.59709e-11	MG	CDK18
ENSDARG00000012504~~rlbp1a	0	3.38029	0.98	0.041	0	MG	rlbp1a	0	3.33508	0.756	0.043	0	MG	rlbp1a
ENSDARG00000012801~~pfkpb	0	1.42174	0.827	0.184	0	MG	pfkpb	1.34937e-263	1.33047	0.269	0.029	4.38814e-259	MG	pfkpb
ENSDARG00000012914~~arhgef4	0	1.74396	0.982	0.286	0	MG	arhgef4	1.10717e-97	1.08418	0.271	0.065	3.6005e-93	MG	arhgef4
ENSDARG00000012942~~itgb5	0	1.99025	0.946	0.15	0	MG	itgb5	3.02691e-54	0.817303	0.2	0.058	9.8435e-50	MG	itgb5
ENSDARG00000013005~~opcml	1.10576e-212	0.698928	0.779	0.361	3.59595e-208	MG	opcml	3.15255e-58	0.816584	0.125	0.025	1.02521e-53	MG	opcml
ENSDARG00000013968~~psap	3.57911e-270	0.742447	0.412	0.097	1.16393e-265	MG	psap	2.64014e-36	0.737448	0.391	0.202	8.58574e-32	MG	psap
ENSDARG00000014577~~rhpn2	0	1.32198	0.526	0.037	0	MG	rhpn2	3.20315e-64	0.530374	0.09	0.013	1.04167e-59	MG	rhpn2
ENSDARG00000015002~~cdh4	0	1.643	0.962	0.263	0	MG	cdh4	0	2.13232	0.732	0.149	0	MG	cdh4
ENSDARG00000015176~~ror1	0	2.85104	0.996	0.168	0	MG	ror1	0	2.22843	0.426	0.046	0	MG	ror1
ENSDARG00000015199~~cblb	2.6209e-186	0.617805	0.384	0.117	8.52317e-182	MG	cblb	6.5538e-53	0.572862	0.177	0.047	2.1313e-48	MG	cblb
ENSDARG00000015472~~gpc4	3.82634e-102	0.511851	0.275	0.101	1.24432e-97	MG	gpc4	3.40331e-61	0.865789	0.289	0.099	1.10676e-56	MG	gpc4
ENSDARG00000015546~~alpl	0	1.07341	0.728	0.193	0	MG	alpl	5.32213e-123	1.41294	0.293	0.066	1.73076e-118	MG	alpl
ENSDARG00000015552~~phactr4a	0	0.962108	0.761	0.219	0	MG	phactr4a	1.93513e-114	1.09964	0.271	0.059	6.29305e-110	MG	phactr4a
ENSDARG00000015790~~atp1b3a	0	2.67201	0.914	0.051	0	MG	atp1b3a	5.02818e-81	1.41139	0.389	0.148	1.63516e-76	MG	atp1b3a
ENSDARG00000015805~~cgnl1	0	0.893441	0.57	0.144	0	MG	cgnl1	0	1.95085	0.529	0.068	0	MG	cgnl1
ENSDARG00000015891~~ptprea	0	1.08311	0.518	0.077	0	MG	ptprea	6.83939e-44	0.726991	0.328	0.138	2.22417e-39	MG	ptprea
ENSDARG00000016153~~dag1	1.42166e-233	0.63714	0.936	0.453	4.62324e-229	MG	dag1	1.13805e-77	0.95253	0.624	0.316	3.70092e-73	MG	dag1
ENSDARG00000016404~~ptch1	0	1.61037	0.93	0.194	0	MG	ptch1	7.4559e-124	1.11534	0.301	0.068	2.42466e-119	MG	ptch1
ENSDARG00000016749~~slco1c1	0	1.36258	0.673	0.092	0	MG	slco1c1	6.23491e-242	0.980787	0.209	0.019	2.02759e-237	MG	slco1c1
ENSDARG00000016866~~fam102ab	0	0.986112	0.576	0.123	0	MG	fam102ab	8.45876e-147	1.0163	0.186	0.025	2.75079e-142	MG	fam102ab
ENSDARG00000016904~~bckdk	0	1.21584	0.728	0.159	0	MG	bckdk	3.46725e-28	0.634373	0.182	0.071	1.12755e-23	MG	bckdk
ENSDARG00000017107~~nr2e1	1.96613e-259	0.801489	0.351	0.076	6.39386e-255	MG	nr2e1	3.22077e-67	0.818175	0.205	0.053	1.04739e-62	MG	nr2e1
ENSDARG00000017211~~plxnb1b	0	1.58502	0.988	0.309	0	MG	plxnb1b	1.22808e-297	1.85479	0.586	0.126	3.99373e-293	MG	plxnb1b
ENSDARG00000017294~~gnai2b	0	0.865522	0.416	0.088	0	MG	gnai2b	9.96772e-33	0.558517	0.155	0.051	3.2415e-28	MG	gnai2b
ENSDARG00000017312~~lmbrd2b	1.20229e-253	0.687411	0.322	0.061	3.90985e-249	MG	lmbrd2b	1.21237e-26	0.526829	0.147	0.053	3.94263e-22	MG	lmbrd2b
ENSDARG00000017466~~ncam2	0	2.60573	0.965	0.192	0	MG	ncam2	3.30467e-19	0.618108	0.099	0.035	1.07468e-14	MG	ncam2
ENSDARG00000017591~~fat1a	0	1.12948	0.93	0.323	0	MG	fat1a	3.17926e-41	0.635987	0.465	0.24	1.03389e-36	MG	fat1a
ENSDARG00000017785~~zgc:158689	0	1.00295	0.474	0.083	0	MG	zgc:158689	1.29512e-85	0.849284	0.188	0.039	4.21175e-81	MG	zgc:158689
ENSDARG00000017794~~sdr16c5b	0	1.14054	0.556	0.094	0	MG	sdr16c5b	0	1.68137	0.329	0.021	0	MG	sdr16c5b
ENSDARG00000018010~~crtap	3.43516e-222	0.626516	0.176	0.015	1.11711e-217	MG	crtap	3.11991e-122	0.962047	0.224	0.04	1.0146e-117	MG	crtap
ENSDARG00000018060~~pik3r2	0	1.56118	0.855	0.168	0	MG	pik3r2	4.61261e-76	0.914929	0.236	0.063	1.50002e-71	MG	pik3r2
ENSDARG00000018162~~ctnnal1	0	1.648	0.595	0.016	0	MG	ctnnal1	1.51585e-63	0.783125	0.183	0.046	4.92954e-59	MG	ctnnal1
ENSDARG00000018174~~gnai2a	0	1.63029	0.994	0.379	0	MG	gnai2a	0	2.00634	0.665	0.136	0	MG	gnai2a
ENSDARG00000018485~~cyp2v1	4.91273e-251	0.648102	0.21	0.02	1.59762e-246	MG	cyp2v1	5.38283e-217	0.613005	0.099	0.005	1.7505e-212	MG	cyp2v1
ENSDARG00000019353~~sparc	0	2.25543	0.787	0.08	0	MG	sparc	5.80108e-81	1.3095	0.632	0.354	1.88651e-76	MG	sparc
ENSDARG00000019367~~tgfb3	0	2.60007	0.87	0.013	0	MG	tgfb3	0	1.92393	0.347	0.007	0	MG	tgfb3
ENSDARG00000019532~~fads2	2.80026e-289	0.793797	0.356	0.066	9.10645e-285	MG	fads2	4.00685e-137	0.533268	0.08	0.005	1.30303e-132	MG	fads2
ENSDARG00000019728~~bmpr1aa	0	1.28307	0.756	0.134	0	MG	bmpr1aa	1.08936e-23	0.565705	0.25	0.123	3.54261e-19	MG	bmpr1aa
ENSDARG00000019856~~atp1a1b	0	2.99946	0.955	0.123	0	MG	atp1a1b	0	2.98591	0.427	0.047	0	MG	atp1a1b
ENSDARG00000019881~~bsg	0	1.11941	0.879	0.334	0	MG	bsg	6.0515e-34	0.736607	0.597	0.418	1.96795e-29	MG	bsg
ENSDARG00000020009~~bmp2k	0	2.25568	0.997	0.339	0	MG	bmp2k	3.48858e-145	1.42354	0.386	0.097	1.13449e-140	MG	bmp2k
ENSDARG00000020053~~nkd1	0	1.04688	0.422	0.043	0	MG	nkd1	7.43146e-49	0.733472	0.146	0.037	2.41671e-44	MG	nkd1
ENSDARG00000020131~~fnbp1l	1.63541e-200	0.612202	0.888	0.485	5.31836e-196	MG	fnbp1l	3.14398e-101	1.28957	0.459	0.164	1.02242e-96	MG	fnbp1l
ENSDARG00000020134~~sipa1l1	0	1.08217	0.843	0.262	0	MG	sipa1l1	0	2.27372	0.611	0.089	0	MG	sipa1l1
ENSDARG00000020284~~si:ch211-278j3.3	0	1.3141	0.836	0.184	0	MG	si:ch211-278j3.3	2.39173e-213	1.17585	0.259	0.033	7.77791e-209	MG	si:ch211-278j3.3
ENSDARG00000020541~~ism1	0	0.712179	0.209	0.01	0	MG	ism1	5.52865e-79	0.50309	0.101	0.013	1.79792e-74	MG	ism1
ENSDARG00000020625~~jak1	7.37692e-173	0.577442	0.783	0.413	2.39897e-168	MG	jak1	2.7673e-37	0.7048	0.259	0.106	8.99926e-33	MG	jak1
ENSDARG00000020656~~prkg1a	0	1.15011	0.562	0.078	0	MG	prkg1a	2.32591e-98	0.61642	0.101	0.011	7.56387e-94	MG	prkg1a
ENSDARG00000020845~~tns1b	0	1.08731	0.399	0.031	0	MG	tns1b	1.31004e-51	0.865918	0.208	0.064	4.26025e-47	MG	tns1b
ENSDARG00000021195~~st8sia6	0	1.60973	0.627	0.057	0	MG	st8sia6	4.52462e-34	0.644841	0.129	0.038	1.47141e-29	MG	st8sia6
ENSDARG00000021241~~zgc:165604	0	2.57283	0.958	0.109	0	MG	zgc:165604	0	3.29082	0.749	0.039	0	MG	zgc:165604
ENSDARG00000021250~~slc25a48	1.62132e-269	0.58923	0.154	0.003	5.27254e-265	MG	slc25a48	0	0.696171	0.113	0.003	0	MG	slc25a48
ENSDARG00000021443~~zfp36l1b	0	1.36331	0.462	0.013	0	MG	zfp36l1b	0	0.945128	0.164	0.006	0	MG	zfp36l1b
ENSDARG00000021539~~ephb2b	1.56219e-208	0.59193	0.977	0.802	5.08023e-204	MG	ephb2b	1.19295e-51	0.742203	0.768	0.498	3.87948e-47	MG	ephb2b
ENSDARG00000021607~~negr1	0	1.19588	0.995	0.471	0	MG	negr1	3.40111e-29	0.532255	0.562	0.356	1.10604e-24	MG	negr1
ENSDARG00000021833~~ahr2	0	0.904191	0.52	0.128	0	MG	ahr2	1.15137e-138	0.856715	0.18	0.024	3.74426e-134	MG	ahr2
ENSDARG00000021896~~asap3	3.32206e-130	0.577446	0.296	0.099	1.08033e-125	MG	asap3	0	1.0389	0.185	0.006	0	MG	asap3
ENSDARG00000022085~~si:dkey-34e4.1	0	0.991567	0.751	0.218	0	MG	si:dkey-34e4.1	3.63518e-30	0.503404	0.323	0.156	1.18216e-25	MG	si:dkey-34e4.1
ENSDARG00000022650~~cyp2ad3	1.87507e-240	0.550221	0.142	0.004	6.09772e-236	MG	cyp2ad3	0	2.69824	0.334	0.008	0	MG	cyp2ad3
ENSDARG00000023443~~tjp2b	0	1.65095	0.972	0.442	0	MG	tjp2b	0	2.62048	0.836	0.215	0	MG	tjp2b
ENSDARG00000023578~~lpp	0	1.72443	0.969	0.253	0	MG	lpp	0	2.15746	0.54	0.052	0	MG	lpp
ENSDARG00000023713~~aqp1a.1	0	4.40187	0.923	0.004	0	MG	aqp1a.1	3.99288e-167	1.5726	0.155	0.015	1.29849e-162	MG	aqp1a.1
ENSDARG00000024537~~emilin1a	0	1.57865	0.671	0.046	0	MG	emilin1a	0	2.54999	0.707	0.065	0	MG	emilin1a
ENSDARG00000024546~~pla2g4aa	0	1.00168	0.305	0.007	0	MG	pla2g4aa	1.33262e-302	0.529462	0.084	0.002	4.3337e-298	MG	pla2g4aa
ENSDARG00000024759~~inhbab	0	2.32659	0.801	0.013	0	MG	inhbab	0	1.35502	0.155	0.002	0	MG	inhbab
ENSDARG00000024964~~patj	0	1.50087	0.941	0.214	0	MG	patj	6.28607e-121	0.939359	0.214	0.037	2.04423e-116	MG	patj
ENSDARG00000025147~~cd63	3.50016e-145	0.606637	0.415	0.16	1.13825e-140	MG	cd63	1.18301e-17	0.530298	0.278	0.159	3.84713e-13	MG	cd63
ENSDARG00000025420~~fzd5	3.81712e-122	0.566921	0.254	0.079	1.24133e-117	MG	fzd5	1.05044e-44	0.572077	0.122	0.029	3.41602e-40	MG	fzd5
ENSDARG00000025595~~agmo	0	1.22528	0.489	0.044	0	MG	agmo	1.87153e-181	0.556632	0.083	0.004	6.0862e-177	MG	agmo
ENSDARG00000025641~~gli2a	0	1.3944	0.995	0.288	0	MG	gli2a	0	1.9449	0.547	0.093	0	MG	gli2a
ENSDARG00000025826~~gna12a	0	1.05007	0.484	0.092	0	MG	gna12a	1.14919e-195	0.732716	0.132	0.01	3.73715e-191	MG	gna12a
ENSDARG00000025920~~tiam1b	0	1.56593	0.799	0.114	0	MG	tiam1b	2.60464e-81	0.708253	0.129	0.021	8.47029e-77	MG	tiam1b
ENSDARG00000026329~~arhgap29a	1.41791e-270	0.629193	0.837	0.321	4.61104e-266	MG	arhgap29a	5.43043e-146	1.20227	0.347	0.078	1.76597e-141	MG	arhgap29a
ENSDARG00000026531~~alcama	0	1.01869	0.739	0.105	0	MG	alcama	0	1.63845	0.693	0.145	0	MG	alcama
ENSDARG00000026630~~mark3b	7.67013e-197	0.610706	0.878	0.464	2.49433e-192	MG	mark3b	7.258e-254	1.8206	0.594	0.148	2.3603e-249	MG	mark3b
ENSDARG00000026736~~il11ra	6.984e-283	0.800827	0.628	0.22	2.2712e-278	MG	il11ra	6.11318e-302	0.769633	0.137	0.006	1.98801e-297	MG	il11ra
ENSDARG00000026829~~cotl1	0	1.01938	0.469	0.067	0	MG	cotl1	1.01853e-148	1.38584	0.402	0.101	3.31226e-144	MG	cotl1
ENSDARG00000027065~~slc38a3a	8.89693e-199	0.50837	0.91	0.406	2.89328e-194	MG	slc38a3a	1.77177e-77	1.22866	0.483	0.206	5.76179e-73	MG	slc38a3a
ENSDARG00000027087~~tgfb2	1.55158e-264	0.780827	0.347	0.073	5.04573e-260	MG	tgfb2	1.6439e-237	0.619666	0.084	0.003	5.34595e-233	MG	tgfb2
ENSDARG00000027199~~smad1	1.15581e-238	0.697275	0.251	0.038	3.75869e-234	MG	smad1	2.02325e-38	0.595192	0.147	0.044	6.57961e-34	MG	smad1
ENSDARG00000027222~~adgrg1	3.95896e-247	0.768074	0.318	0.065	1.28745e-242	MG	adgrg1	2.27921e-92	0.938589	0.218	0.048	7.41201e-88	MG	adgrg1
ENSDARG00000027552~~mapk1	0	0.918598	0.796	0.271	0	MG	mapk1	2.43937e-31	0.566412	0.144	0.048	7.93282e-27	MG	mapk1
ENSDARG00000027611~~cavin2a	0	2.48421	0.892	0.03	0	MG	cavin2a	0	1.96459	0.365	0.013	0	MG	cavin2a
ENSDARG00000027797~~adcy6b	0	1.24578	0.579	0.076	0	MG	adcy6b	8.59739e-81	0.771677	0.164	0.032	2.79587e-76	MG	adcy6b
ENSDARG00000028053~~bmp1b	0	1.54869	0.552	0.014	0	MG	bmp1b	0	1.59356	0.293	0.006	0	MG	bmp1b
ENSDARG00000028071~~bmp1a	3.20601e-296	0.812399	0.313	0.05	1.0426e-291	MG	bmp1a	5.96818e-75	0.673447	0.141	0.026	1.94085e-70	MG	bmp1a
ENSDARG00000028148~~pax2a	0	0.859471	0.293	0.028	0	MG	pax2a	2.96893e-29	0.526985	0.122	0.038	9.65496e-25	MG	pax2a
ENSDARG00000028396~~fkbp5	5.99246e-118	0.586172	0.184	0.045	1.94875e-113	MG	fkbp5	2.19797e-75	0.768239	0.104	0.015	7.14781e-71	MG	fkbp5
ENSDARG00000028845~~calcr	0	1.31772	0.554	0.062	0	MG	calcr	0	1.76074	0.341	0.035	0	MG	calcr
ENSDARG00000029072~~klf6a	9.3214e-263	0.744982	0.286	0.046	3.03132e-258	MG	klf6a	0	1.66506	0.379	0.042	0	MG	klf6a
ENSDARG00000029146~~lrp1ab	0	1.43902	0.984	0.39	0	MG	lrp1ab	1.34069e-33	0.70759	0.334	0.164	4.35992e-29	MG	lrp1ab
ENSDARG00000029402~~sort1a	0	0.886858	0.586	0.148	0	MG	sort1a	6.65622e-144	1.30724	0.388	0.096	2.1646e-139	MG	sort1a
ENSDARG00000029476~~ldlra	1.35097e-211	0.634252	0.192	0.022	4.39334e-207	MG	ldlra	3.19145e-276	0.75276	0.12	0.005	1.03786e-271	MG	ldlra
ENSDARG00000029668~~crim1	0	1.6815	0.912	0.256	0	MG	crim1	0	2.59071	0.672	0.095	0	MG	crim1
ENSDARG00000029766~~nr1i2	8.49839e-246	0.710017	0.259	0.039	2.76368e-241	MG	nr1i2	1.61596e-109	0.546681	0.095	0.009	5.2551e-105	MG	nr1i2
ENSDARG00000030297~~sox13	0	1.19449	0.705	0.17	0	MG	sox13	0	1.5286	0.332	0.033	0	MG	sox13
ENSDARG00000030364~~angpt1	0	1.63408	0.747	0.105	0	MG	angpt1	0	0.804952	0.134	0.006	0	MG	angpt1
ENSDARG00000030367~~metrn	0	1.19292	0.402	0.025	0	MG	metrn	0	2.05863	0.453	0.054	0	MG	metrn
ENSDARG00000030644~~gnai3	0	1.41921	0.583	0.043	0	MG	gnai3	9.25329e-75	0.617157	0.113	0.017	3.00917e-70	MG	gnai3
ENSDARG00000030722~~xirp1	0	1.9345	0.723	0.008	0	MG	xirp1	0	1.36344	0.232	0.007	0	MG	xirp1
ENSDARG00000030933~~ksr1b	0	1.97508	0.786	0.021	0	MG	ksr1b	1.85479e-262	0.740071	0.116	0.005	6.03179e-258	MG	ksr1b
ENSDARG00000031044~~lipg	1.19141e-262	0.689229	0.186	0.012	3.87447e-258	MG	lipg	0	1.17059	0.229	0.017	0	MG	lipg
ENSDARG00000031095~~veph1	0	1.1517	0.491	0.061	0	MG	veph1	6.69571e-253	1.14304	0.206	0.018	2.17744e-248	MG	veph1
ENSDARG00000031222~~lhx2b	0	1.31347	0.61	0.08	0	MG	lhx2b	3.56961e-91	1.0462	0.313	0.089	1.16084e-86	MG	lhx2b
ENSDARG00000031548~~ephb3a	0	1.22949	0.698	0.141	0	MG	ephb3a	1.09444e-145	1.4123	0.505	0.156	3.55911e-141	MG	ephb3a
ENSDARG00000031720~~clstn1	0	1.29218	0.986	0.609	0	MG	clstn1	2.25051e-31	0.795676	0.591	0.412	7.31864e-27	MG	clstn1
ENSDARG00000031756~~mef2aa	4.84966e-308	0.775292	0.917	0.455	1.57711e-303	MG	mef2aa	6.95987e-125	1.1324	0.415	0.114	2.26335e-120	MG	mef2aa
ENSDARG00000031763~~smad6b	0	1.40478	0.606	0.055	0	MG	smad6b	2.53509e-187	1.0554	0.221	0.028	8.24411e-183	MG	smad6b
ENSDARG00000031911~~tns3.2	0	1.3042	0.491	0.04	0	MG	tns3.2	7.01453e-185	0.744848	0.135	0.011	2.28113e-180	MG	tns3.2
ENSDARG00000032049~~enah	0	1.12458	0.869	0.302	0	MG	enah	2.40912e-144	1.3331	0.49	0.146	7.83446e-140	MG	enah
ENSDARG00000032197~~klf12b	0	1.11255	0.625	0.084	0	MG	klf12b	0	1.30582	0.241	0.02	0	MG	klf12b
ENSDARG00000032317~~tox	0	1.06203	0.963	0.377	0	MG	tox	9.53639e-31	0.509953	0.701	0.465	3.10123e-26	MG	tox
ENSDARG00000032324~~epb41l5	0	0.80174	0.941	0.483	0	MG	epb41l5	1.99057e-38	0.718754	0.28	0.119	6.47332e-34	MG	epb41l5
ENSDARG00000032619~~tob1a	0	1.16518	0.5	0.052	0	MG	tob1a	1.20788e-121	1.30236	0.287	0.063	3.92803e-117	MG	tob1a
ENSDARG00000033307~~igf2b	0	1.32448	0.491	0.027	0	MG	igf2b	9.40173e-152	0.732406	0.102	0.007	3.05744e-147	MG	igf2b
ENSDARG00000033845~~igsf9ba	0	2.04275	0.98	0.202	0	MG	igsf9ba	1.27624e-220	1.64402	0.392	0.072	4.15032e-216	MG	igsf9ba
ENSDARG00000033950~~lamb2l	0	1.94563	0.754	0.013	0	MG	lamb2l	0	1.81265	0.341	0.026	0	MG	lamb2l
ENSDARG00000033978~~nxn	0	1.22427	0.79	0.185	0	MG	nxn	9.59557e-101	1.08222	0.325	0.088	3.12048e-96	MG	nxn
ENSDARG00000033999~~cyp26a1	0	1.95243	0.639	0.074	0	MG	cyp26a1	0	3.26502	0.268	0.024	0	MG	cyp26a1
ENSDARG00000034013~~rgmd	0	1.00443	0.323	0.045	0	MG	rgmd	1.10846e-93	1.08415	0.227	0.051	3.60473e-89	MG	rgmd
ENSDARG00000034117~~rarga	0	0.983442	0.534	0.116	0	MG	rarga	3.69367e-75	0.903701	0.208	0.05	1.20118e-70	MG	rarga
ENSDARG00000034210~~si:dkey-240h12.4	0	0.990325	0.3	0.005	0	MG	si:dkey-240h12.4	9.50151e-211	0.550242	0.084	0.003	3.08989e-206	MG	si:dkey-240h12.4
ENSDARG00000034555~~pard3bb	0	1.57241	0.996	0.348	0	MG	pard3bb	1.81676e-91	1.01996	0.374	0.118	5.9081e-87	MG	pard3bb
ENSDARG00000034785~~dachb	0	1.29056	0.692	0.113	0	MG	dachb	1.41538e-159	0.915577	0.162	0.017	4.60281e-155	MG	dachb
ENSDARG00000034871~~mid2	0	1.24654	0.876	0.284	0	MG	mid2	4.69748e-77	0.898135	0.229	0.058	1.52762e-72	MG	mid2
ENSDARG00000034893~~rarab	0	1.33708	0.961	0.353	0	MG	rarab	1.62904e-129	1.43224	0.65	0.279	5.29765e-125	MG	rarab
ENSDARG00000035132~~rgs3b	0	1.09567	0.522	0.078	0	MG	rgs3b	5.77812e-65	0.840911	0.209	0.056	1.87904e-60	MG	rgs3b
ENSDARG00000035308~~grb10b	0	1.71824	0.991	0.376	0	MG	grb10b	5.15408e-80	1.03599	0.233	0.058	1.67611e-75	MG	grb10b
ENSDARG00000036036~~mdka	0	1.79953	0.999	0.308	0	MG	mdka	2.81387e-132	1.48167	0.911	0.582	9.1507e-128	MG	mdka
ENSDARG00000036090~~pard6gb	0	1.44832	0.93	0.246	0	MG	pard6gb	0	1.89549	0.513	0.078	0	MG	pard6gb
ENSDARG00000036102~~ctdsp2	0	0.968767	0.512	0.089	0	MG	ctdsp2	7.15237e-31	0.592663	0.232	0.097	2.32595e-26	MG	ctdsp2
ENSDARG00000036147~~ano5b	0	1.7871	0.878	0.154	0	MG	ano5b	1.44387e-20	0.503245	0.159	0.068	4.69547e-16	MG	ano5b
ENSDARG00000036279~~lamc1	3.843e-130	0.51121	0.504	0.222	1.24974e-125	MG	lamc1	2.66248e-33	0.655876	0.217	0.086	8.65838e-29	MG	lamc1
ENSDARG00000036427~~slc3a2a	0	0.855163	0.225	0.002	0	MG	slc3a2a	0	2.21757	0.359	0.034	0	MG	slc3a2a
ENSDARG00000036558~~col18a1a	0	2.33462	1	0.304	0	MG	col18a1a	3.48316e-193	1.93429	0.502	0.132	1.13272e-188	MG	col18a1a
ENSDARG00000036774~~rgs12b	0	1.80224	0.931	0.177	0	MG	rgs12b	0	2.1857	0.525	0.042	0	MG	rgs12b
ENSDARG00000036820~~mgll	3.1134e-192	0.544466	0.163	0.017	1.01248e-187	MG	mgll	3.63536e-70	0.551569	0.101	0.015	1.18222e-65	MG	mgll
ENSDARG00000036965~~rnf24	0	1.01441	0.765	0.212	0	MG	rnf24	2.2663e-17	0.563821	0.236	0.128	7.37001e-13	MG	rnf24
ENSDARG00000037018~~gab1	0	1.2168	0.839	0.238	0	MG	gab1	3.4323e-39	0.777862	0.247	0.098	1.11618e-34	MG	gab1
ENSDARG00000037196~~arid5b	1.27859e-271	0.650267	0.99	0.526	4.15798e-267	MG	arid5b	5.78254e-90	1.10957	0.579	0.255	1.88048e-85	MG	arid5b
ENSDARG00000037363~~dennd2b	0	1.34753	0.761	0.138	0	MG	dennd2b	2.56606e-181	1.10401	0.229	0.03	8.34483e-177	MG	dennd2b
ENSDARG00000037476~~sorbs3	0	2.63796	0.982	0.077	0	MG	sorbs3	0	1.38643	0.202	0.006	0	MG	sorbs3
ENSDARG00000037677~~fgf24	0	2.16387	0.718	0.104	0	MG	fgf24	0	2.64291	0.567	0.018	0	MG	fgf24
ENSDARG00000037879~~lfng	0	1.74233	0.945	0.203	0	MG	lfng	2.89588e-224	1.95797	0.666	0.206	9.41739e-220	MG	lfng
ENSDARG00000038166~~hyal6	0	3.83397	0.993	0.059	0	MG	hyal6	0	3.01015	0.436	0.002	0	MG	hyal6
ENSDARG00000038938~~itprid2	0	1.59686	0.753	0.08	0	MG	itprid2	9.29641e-165	1.01116	0.186	0.023	3.02319e-160	MG	itprid2
ENSDARG00000038974~~FO904844.1	4.49733e-140	0.51816	0.217	0.05	1.46253e-135	MG	FO904844.1	2.56366e-41	0.569159	0.168	0.051	8.33704e-37	MG	FO904844.1
ENSDARG00000039452~~hk1	3.64895e-138	0.550078	0.307	0.098	1.18664e-133	MG	hk1	2.8008e-34	0.704749	0.28	0.126	9.10821e-30	MG	hk1
ENSDARG00000039459~~qsox1	0	1.82789	0.692	0.057	0	MG	qsox1	0	1.48156	0.247	0.007	0	MG	qsox1
ENSDARG00000039497~~ccdc85a	0	1.23255	0.778	0.164	0	MG	ccdc85a	1.33989e-77	0.769868	0.173	0.035	4.35733e-73	MG	ccdc85a
ENSDARG00000039534~~rrh	0	0.900515	0.253	0.008	0	MG	rrh	0	0.947656	0.143	0.003	0	MG	rrh
ENSDARG00000039626~~nrgna	0	0.868772	0.298	0.031	0	MG	nrgna	8.99305e-48	0.510159	0.128	0.029	2.92454e-43	MG	nrgna
ENSDARG00000039966~~prom1a	0	1.15417	1	0.666	0	MG	prom1a	0	1.97572	0.65	0.114	0	MG	prom1a
ENSDARG00000039980~~ppt1	7.03352e-221	0.687956	0.287	0.057	2.2873e-216	MG	ppt1	7.31733e-40	0.635617	0.197	0.067	2.37959e-35	MG	ppt1
ENSDARG00000040295~~apoeb	0	4.62473	0.86	0.079	0	MG	apoeb	3.33484e-164	3.891	0.353	0.079	1.08449e-159	MG	apoeb
ENSDARG00000040466~~vil1	0	1.83489	0.616	0.003	0	MG	vil1	0	1.03802	0.17	0.003	0	MG	vil1
ENSDARG00000040469~~enpp6	0	1.2174	0.481	0.043	0	MG	enpp6	1.26045e-117	0.530383	0.09	0.007	4.09898e-113	MG	enpp6
ENSDARG00000040503~~sb:cb81	0	1.37993	0.501	0.032	0	MG	sb:cb81	3.20774e-67	0.939495	0.183	0.045	1.04316e-62	MG	sb:cb81
ENSDARG00000040674~~ctdsp1	0	1.00412	0.425	0.068	0	MG	ctdsp1	6.99284e-155	0.80248	0.162	0.018	2.27407e-150	MG	ctdsp1
ENSDARG00000040764~~id1	0	1.90637	0.951	0.193	0	MG	id1	0	2.37897	0.773	0.218	0	MG	id1
ENSDARG00000041304~~trak1a	0	1.00595	0.501	0.103	0	MG	trak1a	5.02793e-69	0.595093	0.11	0.017	1.63508e-64	MG	trak1a
ENSDARG00000041483~~paqr6	0	1.005	0.363	0.033	0	MG	paqr6	0	0.793579	0.131	0.004	0	MG	paqr6
ENSDARG00000041623~~mt2	0	1.88077	0.562	0.033	0	MG	mt2	2.66093e-111	1.57945	0.242	0.05	8.65335e-107	MG	mt2
ENSDARG00000041729~~sntb1	0	2.06201	0.847	0.074	0	MG	sntb1	0	3.1943	0.771	0.042	0	MG	sntb1
ENSDARG00000041799~~cx43	0	1.93483	0.571	0.001	0	MG	cx43	1.44357e-90	1.54535	0.289	0.081	4.69449e-86	MG	cx43
ENSDARG00000042141~~myo6b	0	1.04202	0.998	0.493	0	MG	myo6b	0	2.30066	0.469	0.028	0	MG	myo6b
ENSDARG00000042677~~cadm1b	0	2.48322	0.98	0.091	0	MG	cadm1b	0	2.41054	0.462	0.008	0	MG	cadm1b
ENSDARG00000042690~~s1pr1	0	1.37895	0.669	0.079	0	MG	s1pr1	7.91782e-96	0.854076	0.361	0.105	2.57488e-91	MG	s1pr1
ENSDARG00000042837~~atp1b3b	0	1.01631	0.713	0.209	0	MG	atp1b3b	2.57248e-173	1.678	0.45	0.115	8.36572e-169	MG	atp1b3b
ENSDARG00000043210~~nfic	3.95819e-249	0.645128	0.982	0.607	1.2872e-244	MG	nfic	3.19855e-123	1.04184	0.226	0.04	1.04017e-118	MG	nfic
ENSDARG00000043226~~nfixa	1.14407e-274	0.692136	0.953	0.525	3.72051e-270	MG	nfixa	5.16117e-75	0.694887	0.116	0.018	1.67841e-70	MG	nfixa
ENSDARG00000043446~~efhd1	0	1.41003	0.537	0.022	0	MG	efhd1	0	2.32582	0.562	0.036	0	MG	efhd1
ENSDARG00000043475~~ENSDARG00000043475	0	2.02656	0.893	0.082	0	MG	ENSDARG00000043475	0	2.03541	0.406	0.009	0	MG	ENSDARG00000043475
ENSDARG00000043710~~parvaa	2.85244e-198	0.714244	0.337	0.092	9.27615e-194	MG	parvaa	3.87834e-162	0.947813	0.189	0.024	1.26124e-157	MG	parvaa
ENSDARG00000044167~~padi2	1.49243e-299	0.721104	0.215	0.014	4.85338e-295	MG	padi2	9.85588e-71	0.525505	0.108	0.017	3.20513e-66	MG	padi2
ENSDARG00000044281~~erbin	0	0.90434	0.971	0.428	0	MG	erbin	8.28451e-57	0.880242	0.553	0.293	2.69412e-52	MG	erbin
ENSDARG00000044345~~cyfip1	2.40147e-275	0.753046	0.556	0.163	7.80958e-271	MG	cyfip1	3.44884e-71	0.768699	0.206	0.051	1.12156e-66	MG	cyfip1
ENSDARG00000044601~~rtn4a	0	1.12975	0.99	0.535	0	MG	rtn4a	4.01751e-54	0.940974	0.528	0.287	1.3065e-49	MG	rtn4a
ENSDARG00000045064~~ablim1b	0	2.11343	0.995	0.285	0	MG	ablim1b	1.18574e-163	1.66492	0.456	0.121	3.85602e-159	MG	ablim1b
ENSDARG00000045414~~elovl2	1.09234e-258	0.81187	0.288	0.05	3.55229e-254	MG	elovl2	1.72883e-241	1.08394	0.221	0.022	5.62217e-237	MG	elovl2
ENSDARG00000045486~~pawr	0	1.00542	0.987	0.307	0	MG	pawr	5.99122e-92	0.706814	0.123	0.017	1.94834e-87	MG	pawr
ENSDARG00000045506~~gramd4b	0	0.855157	0.705	0.23	0	MG	gramd4b	1.67659e-95	1.09721	0.257	0.062	5.45228e-91	MG	gramd4b
ENSDARG00000045658~~msrb3	5.81736e-258	0.726852	0.267	0.038	1.89181e-253	MG	msrb3	0	1.01119	0.182	0.01	0	MG	msrb3
ENSDARG00000045706~~tspan9b	5.5814e-150	0.597335	0.246	0.063	1.81507e-145	MG	tspan9b	2.70192e-40	0.523802	0.119	0.03	8.78665e-36	MG	tspan9b
ENSDARG00000045749~~ppfibp1a	1.41575e-303	0.669424	0.166	0.002	4.60401e-299	MG	ppfibp1a	3.4743e-157	0.727503	0.117	0.009	1.12984e-152	MG	ppfibp1a
ENSDARG00000045926~~crabp1a	3.02744e-260	0.755786	0.693	0.259	9.84523e-256	MG	crabp1a	0	2.03746	0.62	0.119	0	MG	crabp1a
ENSDARG00000045930~~rbpms2a	0	1.15831	0.893	0.13	0	MG	rbpms2a	1.72545e-218	1.23884	0.502	0.107	5.61115e-214	MG	rbpms2a
ENSDARG00000045936~~pax6b	0	0.737781	0.98	0.354	0	MG	pax6b	8.89849e-86	0.849716	0.641	0.304	2.89379e-81	MG	pax6b
ENSDARG00000046054~~CT027815.1	0	1.16329	0.469	0.045	0	MG	CT027815.1	2.37296e-40	0.626689	0.14	0.039	7.71686e-36	MG	CT027815.1
ENSDARG00000051876~~ush1c	0	1.81469	0.739	0.046	0	MG	ush1c	0	1.5813	0.286	0.008	0	MG	ush1c
ENSDARG00000052061~~col4a6	0	2.19772	0.888	0.047	0	MG	col4a6	5.61262e-14	0.559856	0.206	0.116	1.82522e-09	MG	col4a6
ENSDARG00000052131~~gli3	0	0.871801	0.723	0.218	0	MG	gli3	1.68539e-93	1.07364	0.349	0.106	5.48088e-89	MG	gli3
ENSDARG00000052139~~notch3	0	1.37704	0.856	0.186	0	MG	notch3	0	2.53241	0.803	0.176	0	MG	notch3
ENSDARG00000052242~~aff2	0	1.68657	0.975	0.261	0	MG	aff2	0	1.93034	0.6	0.107	0	MG	aff2
ENSDARG00000052702~~capn1a	0	1.09355	0.501	0.065	0	MG	capn1a	4.72528e-241	1.18279	0.259	0.03	1.53666e-236	MG	capn1a
ENSDARG00000053129~~carhsp1	0	0.810209	0.291	0.036	0	MG	carhsp1	1.09937e-36	0.538313	0.123	0.034	3.57516e-32	MG	carhsp1
ENSDARG00000053262~~atp1b4	0	2.10099	0.447	0.001	0	MG	atp1b4	0	1.11265	0.144	0.005	0	MG	atp1b4
ENSDARG00000053272~~RAP1GAP	0	1.24871	0.589	0.086	0	MG	RAP1GAP	0	1.40797	0.278	0.006	0	MG	RAP1GAP
ENSDARG00000053535~~lmo7b	0	1.98726	0.713	0.006	0	MG	lmo7b	0	2.08075	0.307	0.002	0	MG	lmo7b
ENSDARG00000053724~~adcyap1r1a	0	3.2855	0.967	0.036	0	MG	adcyap1r1a	0	2.66425	0.517	0.007	0	MG	adcyap1r1a
ENSDARG00000053835~~plekhh1	0	1.62113	0.774	0.108	0	MG	plekhh1	0	1.47573	0.296	0.027	0	MG	plekhh1
ENSDARG00000053859~~ism2b	0	0.917685	0.255	0.004	0	MG	ism2b	0	1.60365	0.338	0.021	0	MG	ism2b
ENSDARG00000054619~~fras1	0	0.925921	0.293	0.016	0	MG	fras1	2.69637e-261	1.55575	0.346	0.049	8.76859e-257	MG	fras1
ENSDARG00000054771~~ghra	0	2.37957	0.921	0.07	0	MG	ghra	6.04652e-247	1.87172	0.367	0.059	1.96633e-242	MG	ghra
ENSDARG00000054823~~id3	0	0.831461	0.326	0.049	0	MG	id3	8.63865e-57	0.856955	0.262	0.087	2.80929e-52	MG	id3
ENSDARG00000054978~~kifc3	0	1.58695	0.851	0.118	0	MG	kifc3	5.78185e-150	1.47717	0.439	0.118	1.88026e-145	MG	kifc3
ENSDARG00000055120~~ctsba	1.3913e-211	0.723752	0.379	0.106	4.52451e-207	MG	ctsba	5.08587e-41	0.834441	0.299	0.127	1.65393e-36	MG	ctsba
ENSDARG00000055158~~prox1a	0	0.687608	0.985	0.372	0	MG	prox1a	2.14754e-266	1.48217	0.823	0.233	6.98381e-262	MG	prox1a
ENSDARG00000055225~~dock8	0	2.3839	0.941	0.058	0	MG	dock8	0	1.92854	0.397	0.034	0	MG	dock8
ENSDARG00000055307~~sypl2a	1.67099e-145	0.533883	0.178	0.033	5.43405e-141	MG	sypl2a	1.04497e-254	1.14615	0.253	0.027	3.39824e-250	MG	sypl2a
ENSDARG00000055373~~sema3fb	2.88915e-267	0.696749	0.203	0.016	9.3955e-263	MG	sema3fb	2.51195e-185	1.04972	0.174	0.017	8.16886e-181	MG	sema3fb
ENSDARG00000055381~~bambia	0	1.0756	0.52	0.148	0	MG	bambia	9.10222e-45	0.973573	0.281	0.114	2.96004e-40	MG	bambia
ENSDARG00000055543~~appb	0	0.818048	0.666	0.188	0	MG	appb	1.29904e-46	0.810932	0.478	0.249	4.22449e-42	MG	appb
ENSDARG00000055607~~cgna	5.13108e-221	0.686406	0.423	0.121	1.66863e-216	MG	cgna	9.78589e-269	1.43	0.314	0.039	3.18237e-264	MG	cgna
ENSDARG00000055632~~smtnl	1.77335e-263	0.605043	0.155	0.004	5.76695e-259	MG	smtnl	0	0.742562	0.117	0.002	0	MG	smtnl
ENSDARG00000055678~~akap12b	1.98699e-266	0.811137	0.509	0.16	6.4617e-262	MG	akap12b	4.88824e-72	1.01554	0.377	0.142	1.58966e-67	MG	akap12b
ENSDARG00000056078~~rftn2	0	1.17935	0.59	0.084	0	MG	rftn2	9.4203e-212	1.34591	0.37	0.066	3.06348e-207	MG	rftn2
ENSDARG00000056245~~zgc:162952	0	1.15182	0.356	0.012	0	MG	zgc:162952	0	0.761996	0.116	0.002	0	MG	zgc:162952
ENSDARG00000056322~~ldb3a	0	0.877571	0.62	0.169	0	MG	ldb3a	1.83974e-64	0.619792	0.113	0.019	5.98285e-60	MG	ldb3a
ENSDARG00000056481~~vat1	0	1.34393	0.883	0.235	0	MG	vat1	4.78092e-128	1.21008	0.343	0.083	1.55475e-123	MG	vat1
ENSDARG00000056525~~bcar1	3.20271e-169	0.5907	0.349	0.105	1.04152e-164	MG	bcar1	1.43428e-113	1.16415	0.316	0.078	4.66427e-109	MG	bcar1
ENSDARG00000056680~~stc2a	0	1.57816	0.324	0.008	0	MG	stc2a	0	2.09859	0.173	0.009	0	MG	stc2a
ENSDARG00000056704~~RAMP1	0	1.63006	0.646	0.1	0	MG	RAMP1	1.30389e-33	0.998464	0.119	0.034	4.24025e-29	MG	RAMP1
ENSDARG00000056774~~gpr37l1b	0	0.826058	0.229	0.006	0	MG	gpr37l1b	0	0.531956	0.093	0.001	0	MG	gpr37l1b
ENSDARG00000056922~~ltbp1	0	2.09396	0.809	0.041	0	MG	ltbp1	0	1.23521	0.185	0.006	0	MG	ltbp1
ENSDARG00000056934~~hepacama	0	1.27281	0.403	0.008	0	MG	hepacama	0	0.716218	0.102	0.001	0	MG	hepacama
ENSDARG00000057452~~ston2	0	0.969372	0.598	0.126	0	MG	ston2	3.78219e-76	0.790712	0.198	0.045	1.22997e-71	MG	ston2
ENSDARG00000057671~~epas1b	0	2.13122	0.897	0.119	0	MG	epas1b	0	1.44805	0.244	0.015	0	MG	epas1b
ENSDARG00000057698~~ctsd	8.03427e-142	0.534643	0.502	0.201	2.61275e-137	MG	ctsd	5.36647e-18	0.556152	0.49	0.349	1.74517e-13	MG	ctsd
ENSDARG00000057737~~rxraa	0	1.4466	0.891	0.305	0	MG	rxraa	2.8736e-150	1.38664	0.389	0.093	9.34495e-146	MG	rxraa
ENSDARG00000057927~~rps6ka3b	6.18321e-278	0.781274	0.709	0.268	2.01078e-273	MG	rps6ka3b	0	2.67875	0.677	0.045	0	MG	rps6ka3b
ENSDARG00000057992~~fstb	0	1.38265	0.471	0.033	0	MG	fstb	0	0.877969	0.09	0.002	0	MG	fstb
ENSDARG00000058348~~scinlb	0	0.698096	0.195	0.008	0	MG	scinlb	2.38807e-125	0.512503	0.086	0.006	7.766e-121	MG	scinlb
ENSDARG00000058459~~plekhg2	1.84006e-219	0.72416	0.494	0.165	5.98387e-215	MG	plekhg2	0	1.66358	0.376	0.037	0	MG	plekhg2
ENSDARG00000058543~~lama5	0	2.21697	0.866	0.03	0	MG	lama5	0	2.02093	0.445	0.038	0	MG	lama5
ENSDARG00000058699~~tmeff2b	0	1.67188	0.603	0.036	0	MG	tmeff2b	1.30431e-139	0.58875	0.089	0.006	4.24163e-135	MG	tmeff2b
ENSDARG00000058730~~rdh10a	0	2.06883	0.542	0.027	0	MG	rdh10a	2.69841e-40	0.915354	0.155	0.046	8.77521e-36	MG	rdh10a
ENSDARG00000058966~~zgc:112332	0	2.80893	0.86	0.015	0	MG	zgc:112332	1.81721e-196	0.893628	0.203	0.022	5.90955e-192	MG	zgc:112332
ENSDARG00000059347~~calml4b	0	2.80398	0.951	0.041	0	MG	calml4b	0	0.858617	0.11	0.002	0	MG	calml4b
ENSDARG00000059483~~tead1b	2.57964e-233	0.674576	0.896	0.426	8.38899e-229	MG	tead1b	1.54949e-78	1.01273	0.317	0.099	5.03896e-74	MG	tead1b
ENSDARG00000059610~~gpr146	0	1.08414	0.464	0.059	0	MG	gpr146	1.24668e-31	0.674067	0.208	0.082	4.05421e-27	MG	gpr146
ENSDARG00000059751~~abtb2a	0	0.894796	0.282	0.016	0	MG	abtb2a	7.34666e-281	0.92752	0.161	0.01	2.38913e-276	MG	abtb2a
ENSDARG00000059933~~plpp3	0	1.26826	0.713	0.151	0	MG	plpp3	0	2.13414	0.689	0.122	0	MG	plpp3
ENSDARG00000060006~~nedd4l	0	1.12212	0.985	0.499	0	MG	nedd4l	3.78986e-17	0.533929	0.253	0.141	1.23246e-12	MG	nedd4l
ENSDARG00000060070~~adcy7	0	1.88321	0.85	0.131	0	MG	adcy7	2.19719e-127	0.87544	0.179	0.025	7.14528e-123	MG	adcy7
ENSDARG00000060072~~abi3a	0	1.3836	0.463	0.001	0	MG	abi3a	0	1.80427	0.359	0.002	0	MG	abi3a
ENSDARG00000060102~~kank1a	0	1.25162	0.695	0.139	0	MG	kank1a	6.80204e-88	0.873693	0.189	0.038	2.21202e-83	MG	kank1a
ENSDARG00000060415~~arhgef28a	0	2.40245	0.879	0.024	0	MG	arhgef28a	0	1.3732	0.265	0.005	0	MG	arhgef28a
ENSDARG00000060841~~pik3c2a	0	1.53207	0.792	0.105	0	MG	pik3c2a	5.02281e-39	0.56499	0.116	0.029	1.63342e-34	MG	pik3c2a
ENSDARG00000061039~~atp10a	1.16311e-264	0.76876	0.593	0.21	3.78243e-260	MG	atp10a	9.93567e-23	0.523896	0.147	0.059	3.23108e-18	MG	atp10a
ENSDARG00000061099~~nfasca	0	3.23126	1	0.369	0	MG	nfasca	5.44714e-112	2.1121	0.528	0.223	1.77141e-107	MG	nfasca
ENSDARG00000061120~~slc43a2b	0	2.29731	0.822	0.023	0	MG	slc43a2b	0	0.777435	0.11	0.002	0	MG	slc43a2b
ENSDARG00000061328~~cdon	0	2.57278	0.998	0.194	0	MG	cdon	1.6723e-97	0.850551	0.388	0.116	5.43831e-93	MG	cdon
ENSDARG00000061371~~cdh18a	0	1.29017	0.601	0.07	0	MG	cdh18a	3.96294e-75	0.668953	0.15	0.028	1.28875e-70	MG	cdh18a
ENSDARG00000061405~~eva1a	0	1.74615	0.619	0.026	0	MG	eva1a	0	1.77034	0.305	0.016	0	MG	eva1a
ENSDARG00000061445~~adcy6a	0	1.54156	0.927	0.224	0	MG	adcy6a	0	1.60131	0.417	0.051	0	MG	adcy6a
ENSDARG00000061590~~cachd1	0	1.01772	0.59	0.136	0	MG	cachd1	3.45531e-220	1.45293	0.442	0.09	1.12367e-215	MG	cachd1
ENSDARG00000061654~~wwc3	0	1.02959	0.485	0.089	0	MG	wwc3	8.6021e-79	0.831678	0.168	0.034	2.7974e-74	MG	wwc3
ENSDARG00000061697~~ca14	0	2.34434	0.901	0.047	0	MG	ca14	0	1.87612	0.293	0.004	0	MG	ca14
ENSDARG00000061796~~rasgrp4	0	1.76561	0.641	0.002	0	MG	rasgrp4	0	0.738913	0.104	0.002	0	MG	rasgrp4
ENSDARG00000061836~~nfixb	0	1.61198	1	0.409	0	MG	nfixb	0	2.66584	0.594	0.016	0	MG	nfixb
ENSDARG00000061848~~col15a1b	0	3.27331	0.842	0.012	0	MG	col15a1b	1.16888e-77	2.13298	0.259	0.076	3.80121e-73	MG	col15a1b
ENSDARG00000061940~~htr4	0	1.59137	0.702	0.084	0	MG	htr4	3.60602e-232	1.26008	0.23	0.024	1.17268e-227	MG	htr4
ENSDARG00000062023~~fndc3bb	0	1.05807	0.677	0.174	0	MG	fndc3bb	2.41081e-136	1.02789	0.229	0.039	7.83995e-132	MG	fndc3bb
ENSDARG00000062165~~tub	0	1.20277	0.567	0.072	0	MG	tub	1.08455e-63	0.686851	0.113	0.019	3.52697e-59	MG	tub
ENSDARG00000062220~~plekha7b	0	0.943892	0.986	0.46	0	MG	plekha7b	0	2.09171	0.618	0.105	0	MG	plekha7b
ENSDARG00000062315~~sik2b	0	1.6836	0.808	0.139	0	MG	sik2b	1.43057e-40	0.83718	0.185	0.061	4.6522e-36	MG	sik2b
ENSDARG00000062415~~ctnnd2a	0	1.49429	0.918	0.232	0	MG	ctnnd2a	1.4873e-26	0.621871	0.164	0.063	4.83669e-22	MG	ctnnd2a
ENSDARG00000062420~~nfia	0	1.2719	0.991	0.466	0	MG	nfia	0	1.78519	0.78	0.163	0	MG	nfia
ENSDARG00000062460~~SGK3	0	0.873955	0.455	0.105	0	MG	SGK3	1.17649e-129	0.953476	0.152	0.019	3.82595e-125	MG	SGK3
ENSDARG00000062573~~znrf3	0	1.20467	0.946	0.403	0	MG	znrf3	3.83436e-57	1.01172	0.374	0.159	1.24693e-52	MG	znrf3
ENSDARG00000062590~~pleca	0	2.46895	0.999	0.335	0	MG	pleca	1.28076e-63	1.28402	0.265	0.087	4.16504e-59	MG	pleca
ENSDARG00000062855~~plekhg7	0	3.53627	1	0.121	0	MG	plekhg7	0	2.94295	0.792	0.066	0	MG	plekhg7
ENSDARG00000063026~~mlc1	0	2.30671	0.848	0.015	0	MG	mlc1	0	0.857469	0.134	0	0	MG	mlc1
ENSDARG00000063040~~btbd11b	0	1.50516	0.661	0.078	0	MG	btbd11b	0	1.90301	0.402	0.017	0	MG	btbd11b
ENSDARG00000063068~~syne1b	0	1.79602	1	0.626	0	MG	syne1b	5.24454e-84	1.58663	0.42	0.166	1.70553e-79	MG	syne1b
ENSDARG00000063075~~soga1	0	1.62224	0.983	0.325	0	MG	soga1	3.69341e-108	1.24239	0.46	0.159	1.2011e-103	MG	soga1
ENSDARG00000063230~~bmp7b	0	2.09194	0.782	0.067	0	MG	bmp7b	8.82071e-229	1.29867	0.326	0.048	2.8685e-224	MG	bmp7b
ENSDARG00000063390~~pvrl2l	0	1.49349	0.927	0.257	0	MG	pvrl2l	1.41147e-68	0.961407	0.31	0.101	4.59009e-64	MG	pvrl2l
ENSDARG00000063416~~ptprk	0	2.08157	0.993	0.218	0	MG	ptprk	7.40636e-56	0.8298	0.314	0.119	2.40855e-51	MG	ptprk
ENSDARG00000063572~~perp	1.91315e-261	0.781325	0.303	0.055	6.22158e-257	MG	perp	1.65148e-29	0.551285	0.167	0.061	5.37062e-25	MG	perp
ENSDARG00000067719~~wwtr1	8.03726e-269	0.79285	0.31	0.056	2.61372e-264	MG	wwtr1	1.89836e-99	0.683341	0.117	0.015	6.17348e-95	MG	wwtr1
ENSDARG00000067976~~ar	0	1.55273	0.74	0.079	0	MG	ar	3.70765e-137	0.593734	0.081	0.005	1.20573e-132	MG	ar
ENSDARG00000067984~~gas1b	0	1.53781	0.628	0.039	0	MG	gas1b	0	1.85651	0.444	0.048	0	MG	gas1b
ENSDARG00000068261~~pros1	0	1.17861	0.483	0.051	0	MG	pros1	9.10963e-250	0.888292	0.168	0.012	2.96245e-245	MG	pros1
ENSDARG00000068401~~yap1	0	1.60502	0.921	0.184	0	MG	yap1	0	2.62866	0.695	0.071	0	MG	yap1
ENSDARG00000068572~~slc16a1b	9.50967e-131	0.52856	0.273	0.082	3.09255e-126	MG	slc16a1b	1.10713e-37	0.739389	0.194	0.069	3.60037e-33	MG	slc16a1b
ENSDARG00000068586~~CU302253.1	0	2.41803	0.925	0.065	0	MG	CU302253.1	0	1.234	0.191	0.007	0	MG	CU302253.1
ENSDARG00000068710~~nid1a	7.83547e-212	0.571038	0.159	0.012	2.5481e-207	MG	nid1a	1.17519e-114	0.503896	0.08	0.006	3.82171e-110	MG	nid1a
ENSDARG00000068934~~cyp1b1	1.24686e-242	0.805641	0.272	0.046	4.05478e-238	MG	cyp1b1	1.72582e-128	1.92648	0.26	0.051	5.61238e-124	MG	cyp1b1
ENSDARG00000068973~~pdlim4	6.49153e-261	0.78613	0.399	0.098	2.11105e-256	MG	pdlim4	5.60328e-212	0.573627	0.092	0.004	1.82219e-207	MG	pdlim4
ENSDARG00000069093~~col2a1a	0	2.32171	0.91	0.083	0	MG	col2a1a	2.55427e-148	1.21269	0.214	0.031	8.30647e-144	MG	col2a1a
ENSDARG00000069171~~gramd4a	0	1.64909	0.909	0.204	0	MG	gramd4a	6.19424e-29	0.531278	0.137	0.045	2.01437e-24	MG	gramd4a
ENSDARG00000069185~~celsr1a	2.81917e-279	0.733878	0.906	0.407	9.16793e-275	MG	celsr1a	6.20496e-177	1.11071	0.214	0.027	2.01785e-172	MG	celsr1a
ENSDARG00000069250~~uacaa	4.91513e-204	0.58023	0.17	0.016	1.5984e-199	MG	uacaa	1.8581e-140	0.692892	0.113	0.01	6.04256e-136	MG	uacaa
ENSDARG00000069440~~dachd	0	1.76315	0.987	0.354	0	MG	dachd	9.46972e-68	1.2165	0.418	0.177	3.07955e-63	MG	dachd
ENSDARG00000069484~~dab2ipa	0	1.70086	1	0.666	0	MG	dab2ipa	5.33157e-43	0.873329	0.432	0.221	1.73383e-38	MG	dab2ipa
ENSDARG00000069594~~kif13a	3.88869e-233	0.707123	0.377	0.092	1.2646e-228	MG	kif13a	2.84782e-41	0.517977	0.101	0.022	9.26111e-37	MG	kif13a
ENSDARG00000069755~~mtmr11	2.95714e-159	0.596539	0.522	0.214	9.61661e-155	MG	mtmr11	8.34059e-174	0.995847	0.209	0.026	2.71236e-169	MG	mtmr11
ENSDARG00000069940~~ppap2d	0	2.67261	0.993	0.099	0	MG	ppap2d	0	2.9753	0.737	0.044	0	MG	ppap2d
ENSDARG00000069954~~kcnq5a	0	2.7174	0.873	0.041	0	MG	kcnq5a	3.10584e-58	0.689928	0.089	0.014	1.01002e-53	MG	kcnq5a
ENSDARG00000069980~~lman1	0	0.902421	0.414	0.083	0	MG	lman1	1.1867e-39	0.69421	0.2	0.07	3.85913e-35	MG	lman1
ENSDARG00000070094~~sytl1	0	0.901378	0.373	0.058	0	MG	sytl1	0	1.0294	0.191	0.003	0	MG	sytl1
ENSDARG00000070314~~cald1a	0	1.317	0.812	0.157	0	MG	cald1a	7.54194e-144	1.17497	0.341	0.074	2.45264e-139	MG	cald1a
ENSDARG00000070470~~sh3rf1	4.99735e-281	0.769516	0.611	0.204	1.62514e-276	MG	sh3rf1	6.84118e-22	0.552361	0.186	0.084	2.22475e-17	MG	sh3rf1
ENSDARG00000070538~~hey1	0	1.12583	0.363	0.012	0	MG	hey1	5.04965e-304	1.12876	0.211	0.016	1.64215e-299	MG	hey1
ENSDARG00000070603~~hspa12a	0	1.15979	0.495	0.064	0	MG	hspa12a	2.61658e-244	0.944681	0.162	0.012	8.50911e-240	MG	hspa12a
ENSDARG00000070913~~sox2	2.9779e-143	0.607674	0.35	0.125	9.68414e-139	MG	sox2	5.22648e-22	0.50155	0.167	0.071	1.69965e-17	MG	sox2
ENSDARG00000071213~~rgl3a	0	2.29621	0.919	0.091	0	MG	rgl3a	0	1.36246	0.232	0.003	0	MG	rgl3a
ENSDARG00000071673~~ctdspla	2.22281e-208	0.608049	0.753	0.305	7.22858e-204	MG	ctdspla	6.00532e-15	0.50409	0.292	0.18	1.95293e-10	MG	ctdspla
ENSDARG00000071692~~prex2	0	3.06482	1	0.25	0	MG	prex2	0	2.12122	0.346	0.007	0	MG	prex2
ENSDARG00000073688~~nav2a	0	2.26721	0.992	0.269	0	MG	nav2a	1.5729e-154	1.4518	0.526	0.159	5.11509e-150	MG	nav2a
ENSDARG00000073738~~dennd2c	4.37902e-194	0.666254	0.334	0.089	1.42406e-189	MG	dennd2c	6.38335e-159	1.10963	0.266	0.045	2.07586e-154	MG	dennd2c
ENSDARG00000073753~~tacc1	0	1.20753	0.517	0.053	0	MG	tacc1	0	0.929154	0.168	0.008	0	MG	tacc1
ENSDARG00000073957~~tox3	0	0.832739	0.934	0.352	0	MG	tox3	2.39802e-32	0.628163	0.426	0.232	7.79835e-28	MG	tox3
ENSDARG00000074184~~arhgap32b	0	1.34842	0.859	0.251	0	MG	arhgap32b	0	2.09689	0.699	0.162	0	MG	arhgap32b
ENSDARG00000074335~~boc	0	2.23728	0.928	0.168	0	MG	boc	1.63392e-104	1.2041	0.326	0.09	5.31351e-100	MG	boc
ENSDARG00000074527~~chst15	0	2.00916	0.819	0.029	0	MG	chst15	3.84156e-276	0.591334	0.092	0.003	1.24928e-271	MG	chst15
ENSDARG00000074563~~gpr37a	0	2.37905	0.97	0.157	0	MG	gpr37a	0	2.25443	0.693	0.095	0	MG	gpr37a
ENSDARG00000074597~~lzts2a	1.61939e-204	0.618909	0.693	0.298	5.26624e-200	MG	lzts2a	1.06226e-26	0.513491	0.23	0.103	3.45448e-22	MG	lzts2a
ENSDARG00000074635~~abca1a	0	1.40907	0.954	0.372	0	MG	abca1a	2.29671e-54	1.16863	0.302	0.115	7.46889e-50	MG	abca1a
ENSDARG00000074636~~cep170b	0	1.53281	0.794	0.114	0	MG	cep170b	0	1.18187	0.218	0.015	0	MG	cep170b
ENSDARG00000074752~~hlfa	0	0.847112	0.605	0.145	0	MG	hlfa	1.17459e-25	0.55177	0.176	0.071	3.81977e-21	MG	hlfa
ENSDARG00000075034~~raver2	0	0.941597	0.886	0.312	0	MG	raver2	0	2.06283	0.445	0.023	0	MG	raver2
ENSDARG00000075253~~pik3cb	0	0.978995	0.356	0.037	0	MG	pik3cb	1.28843e-227	0.80791	0.141	0.009	4.18996e-223	MG	pik3cb
ENSDARG00000075725~~cep152	2.59625e-132	0.56806	0.377	0.146	8.443e-128	MG	cep152	5.71944e-57	0.754781	0.182	0.049	1.85996e-52	MG	cep152
ENSDARG00000075759~~samd4a	1.74425e-171	0.627503	0.29	0.076	5.67232e-167	MG	samd4a	8.4172e-91	0.684883	0.122	0.017	2.73727e-86	MG	samd4a
ENSDARG00000075793~~prex1	0	2.90681	0.953	0.088	0	MG	prex1	0	2.08804	0.442	0.035	0	MG	prex1
ENSDARG00000076179~~ngef	0	1.69396	0.691	0.033	0	MG	ngef	0	0.817014	0.14	0.006	0	MG	ngef
ENSDARG00000076292~~tns2a	0	1.05462	0.436	0.07	0	MG	tns2a	1.15238e-59	0.667865	0.131	0.027	3.74754e-55	MG	tns2a
ENSDARG00000076302~~dtx4a	0	1.07363	0.801	0.207	0	MG	dtx4a	2.3221e-296	1.90182	0.665	0.162	7.55146e-292	MG	dtx4a
ENSDARG00000076440~~btbd6a	0	1.10361	0.501	0.074	0	MG	btbd6a	2.70833e-246	1.15727	0.242	0.025	8.80748e-242	MG	btbd6a
ENSDARG00000076564~~hspg2	0	3.20326	0.994	0.104	0	MG	hspg2	0	2.53894	0.408	0.037	0	MG	hspg2
ENSDARG00000076657~~plagl2	0	0.892534	0.517	0.141	0	MG	plagl2	3.13575e-85	0.922167	0.316	0.092	1.01975e-80	MG	plagl2
ENSDARG00000076787~~angpt4	0	1.96362	0.852	0.088	0	MG	angpt4	0	1.21755	0.125	0.004	0	MG	angpt4
ENSDARG00000076796~~dlg3	0	1.48899	0.99	0.337	0	MG	dlg3	4.46848e-226	1.73013	0.553	0.14	1.45315e-221	MG	dlg3
ENSDARG00000076801~~arap3	0	0.917024	0.519	0.129	0	MG	arap3	3.61015e-115	0.698268	0.119	0.013	1.17402e-110	MG	arap3
ENSDARG00000076804~~ttyh1	0	0.851785	0.787	0.301	0	MG	ttyh1	6.43511e-50	0.73701	0.389	0.168	2.0927e-45	MG	ttyh1
ENSDARG00000076867~~mrtfbb	1.3447e-222	0.709601	0.483	0.161	4.37297e-218	MG	mrtfbb	2.47124e-210	0.776013	0.123	0.008	8.03649e-206	MG	mrtfbb
ENSDARG00000076919~~igdcc4	0	1.01571	0.531	0.087	0	MG	igdcc4	1.77436e-20	0.567065	0.197	0.094	5.77021e-16	MG	igdcc4
ENSDARG00000076994~~adgra2	0	2.85943	0.997	0.121	0	MG	adgra2	0	2.21133	0.435	0.006	0	MG	adgra2
ENSDARG00000077176~~zgc:174888	0	1.64012	0.623	0.024	0	MG	zgc:174888	0	0.730568	0.116	0.003	0	MG	zgc:174888
ENSDARG00000077383~~anxa11a	0	0.800814	0.344	0.057	0	MG	anxa11a	7.4706e-137	0.72616	0.143	0.016	2.42944e-132	MG	anxa11a
ENSDARG00000077467~~sox10	2.60353e-236	0.514261	0.131	0.002	8.46667e-232	MG	sox10	0	0.676454	0.114	0.003	0	MG	sox10
ENSDARG00000077596~~phf24	0	1.43599	0.712	0.092	0	MG	phf24	6.89732e-211	1.22847	0.253	0.032	2.24301e-206	MG	phf24
ENSDARG00000077722~~ppp2r3a	8.04074e-256	0.751705	0.258	0.038	2.61485e-251	MG	ppp2r3a	9.38675e-172	0.896378	0.164	0.017	3.05257e-167	MG	ppp2r3a
ENSDARG00000077762~~si:rp71-79p20.2	0	1.51158	0.938	0.265	0	MG	si:rp71-79p20.2	9.05206e-44	0.61832	0.152	0.042	2.94373e-39	MG	si:rp71-79p20.2
ENSDARG00000077788~~arhgef10	0	1.42082	0.571	0.039	0	MG	arhgef10	1.30912e-97	0.684103	0.129	0.018	4.25727e-93	MG	arhgef10
ENSDARG00000077864~~rasgrp3	0	2.6455	0.997	0.202	0	MG	rasgrp3	0	2.22404	0.486	0.016	0	MG	rasgrp3
ENSDARG00000077881~~chl1a	0	1.99631	0.921	0.186	0	MG	chl1a	2.13699e-152	0.971771	0.405	0.092	6.94948e-148	MG	chl1a
ENSDARG00000078179~~fndc3ba	0	1.60013	0.848	0.154	0	MG	fndc3ba	1.24694e-124	1.2384	0.302	0.069	4.05506e-120	MG	fndc3ba
ENSDARG00000078308~~spry2	2.41187e-157	0.583455	0.244	0.058	7.84339e-153	MG	spry2	2.34009e-45	0.625504	0.15	0.041	7.60998e-41	MG	spry2
ENSDARG00000078335~~amot	0	1.68846	0.786	0.081	0	MG	amot	6.28624e-151	0.866503	0.159	0.018	2.04429e-146	MG	amot
ENSDARG00000078399~~acsl2	0	1.89341	0.858	0.118	0	MG	acsl2	6.52277e-186	1.33202	0.325	0.058	2.12121e-181	MG	acsl2
ENSDARG00000078512~~acaca	0	1.76628	0.977	0.331	0	MG	acaca	3.27491e-214	1.61494	0.459	0.099	1.065e-209	MG	acaca
ENSDARG00000078618~~inpp5kb	0	0.870184	0.325	0.042	0	MG	inpp5kb	0	1.75588	0.355	0.015	0	MG	inpp5kb
ENSDARG00000078741~~FRMD1	0	0.742334	0.913	0.371	0	MG	FRMD1	3.4382e-149	1.2008	0.349	0.077	1.1181e-144	MG	FRMD1
ENSDARG00000079029~~dhx32b	1.44845e-258	0.705914	0.734	0.269	4.71035e-254	MG	dhx32b	1.43699e-20	0.601717	0.233	0.118	4.6731e-16	MG	dhx32b
ENSDARG00000079148~~nckap5l	3.27747e-152	0.529534	0.442	0.16	1.06583e-147	MG	nckap5l	2.1352e-24	0.554831	0.212	0.095	6.94367e-20	MG	nckap5l
ENSDARG00000079312~~kmt2ca	0	0.690267	0.982	0.675	0	MG	kmt2ca	1.75436e-47	0.780304	0.504	0.267	5.70518e-43	MG	kmt2ca
ENSDARG00000079588~~castor1	0	2.27002	0.983	0.12	0	MG	castor1	0	1.54681	0.28	0.019	0	MG	castor1
ENSDARG00000079738~~znf219	2.36881e-258	0.723742	0.308	0.054	7.70337e-254	MG	znf219	1.50671e-86	0.537465	0.09	0.01	4.89982e-82	MG	znf219
ENSDARG00000079756~~peak1	4.22305e-156	0.573488	0.251	0.062	1.37334e-151	MG	peak1	1.33371e-31	0.509374	0.093	0.024	4.33723e-27	MG	peak1
ENSDARG00000079917~~rassf7a	0	1.38833	0.927	0.276	0	MG	rassf7a	3.21867e-186	1.25237	0.286	0.045	1.04671e-181	MG	rassf7a
ENSDARG00000079967~~prkd3	0	1.91719	0.949	0.205	0	MG	prkd3	1.99285e-35	0.6037	0.129	0.037	6.48075e-31	MG	prkd3
ENSDARG00000086269~~ndst2a	0	0.905672	0.986	0.55	0	MG	ndst2a	3.20851e-48	0.817409	0.499	0.262	1.04341e-43	MG	ndst2a
ENSDARG00000086471~~pkig	5.56119e-166	0.598472	0.491	0.19	1.8085e-161	MG	pkig	1.08954e-47	0.738629	0.171	0.049	3.54319e-43	MG	pkig
ENSDARG00000086927~~pik3c2b	8.98993e-239	0.724632	0.727	0.303	2.92353e-234	MG	pik3c2b	3.35027e-141	1.31595	0.531	0.173	1.08951e-136	MG	pik3c2b
ENSDARG00000087260~~mtss1lb	0	2.01126	0.99	0.295	0	MG	mtss1lb	4.85487e-35	0.674652	0.43	0.226	1.5788e-30	MG	mtss1lb
ENSDARG00000087657~~fasn	2.57359e-229	0.687456	0.8	0.358	8.36932e-225	MG	fasn	9.17705e-169	1.5152	0.397	0.091	2.98438e-164	MG	fasn
ENSDARG00000087688~~klhl29	0	0.994682	0.914	0.402	0	MG	klhl29	3.24495e-31	0.827805	0.205	0.082	1.05526e-26	MG	klhl29
ENSDARG00000087804~~tnfrsf11a	0	1.22767	0.514	0.057	0	MG	tnfrsf11a	3.87661e-255	0.523481	0.075	0.002	1.26067e-250	MG	tnfrsf11a
ENSDARG00000087822~~agap3	0	0.975474	0.874	0.372	0	MG	agap3	1.83947e-42	0.960956	0.275	0.113	5.98195e-38	MG	agap3
ENSDARG00000087907~~ndufa4l2b	0	2.31327	0.835	0.005	0	MG	ndufa4l2b	0	1.22984	0.179	0.001	0	MG	ndufa4l2b
ENSDARG00000088247~~si:ch1073-303k11.2	0	1.07192	0.365	0.02	0	MG	si:ch1073-303k11.2	5.58635e-292	0.78572	0.126	0.006	1.81668e-287	MG	si:ch1073-303k11.2
ENSDARG00000088515~~st6gal2b	0	1.23298	0.481	0.038	0	MG	st6gal2b	2.47411e-302	0.754986	0.108	0.004	8.0458e-298	MG	st6gal2b
ENSDARG00000089187~~wfdc2	0	0.774131	0.215	0.006	0	MG	wfdc2	5.81927e-292	1.0217	0.135	0.007	1.89243e-287	MG	wfdc2
ENSDARG00000089190~~tanc1b	0	1.24555	0.98	0.412	0	MG	tanc1b	7.23424e-238	1.63752	0.469	0.097	2.35257e-233	MG	tanc1b
ENSDARG00000089418~~si:dkey-164f24.2	0	2.04784	0.677	0.012	0	MG	si:dkey-164f24.2	4.65866e-63	0.756052	0.122	0.022	1.515e-58	MG	si:dkey-164f24.2
ENSDARG00000089871~~jcada	0	1.30772	0.538	0.04	0	MG	jcada	2.26618e-117	0.687649	0.117	0.012	7.36962e-113	MG	jcada
ENSDARG00000089878~~nedd9	0	1.5271	0.855	0.167	0	MG	nedd9	3.6706e-50	0.769507	0.18	0.052	1.19368e-45	MG	nedd9
ENSDARG00000090071~~rxfp1	2.44389e-304	0.721659	0.219	0.015	7.94752e-300	MG	rxfp1	0	1.22433	0.164	0.004	0	MG	rxfp1
ENSDARG00000090170~~rab11fip4a	0	0.769002	0.973	0.549	0	MG	rab11fip4a	5.51619e-47	0.872905	0.374	0.172	1.79386e-42	MG	rab11fip4a
ENSDARG00000090552~~si:dkey-7j14.6	0	1.53231	0.857	0.204	0	MG	si:dkey-7j14.6	1.05753e-284	1.50883	0.355	0.048	3.43907e-280	MG	si:dkey-7j14.6
ENSDARG00000090560~~mfap5	0	2.44714	0.685	0.002	0	MG	mfap5	7.92026e-196	0.52036	0.062	0.002	2.57567e-191	MG	mfap5
ENSDARG00000091348~~rtn3	0	1.1245	0.921	0.355	0	MG	rtn3	2.743e-66	0.969015	0.395	0.16	8.92024e-62	MG	rtn3
ENSDARG00000091503~~FADS6	3.68518e-196	0.535884	0.128	0.006	1.19842e-191	MG	FADS6	0	0.844902	0.134	0.004	0	MG	FADS6
ENSDARG00000092517~~gpsm1a	0	0.858233	0.295	0.031	0	MG	gpsm1a	0	0.650979	0.101	0.003	0	MG	gpsm1a
ENSDARG00000092671~~pard3ba	0	1.25422	0.846	0.23	0	MG	pard3ba	0	2.22635	0.678	0.124	0	MG	pard3ba
ENSDARG00000093201~~si:dkey-112e17.1	0	0.799352	0.21	0.003	0	MG	si:dkey-112e17.1	0	0.723607	0.114	0.001	0	MG	si:dkey-112e17.1
ENSDARG00000093549~~selenop	0	3.78725	0.891	0.023	0	MG	selenop	8.05773e-189	0.801019	0.116	0.008	2.62037e-184	MG	selenop
ENSDARG00000093569~~bckdhbl	0	1.26383	0.619	0.09	0	MG	bckdhbl	5.26732e-240	1.11563	0.176	0.014	1.71293e-235	MG	bckdhbl
ENSDARG00000094064~~CR788236.1	0	1.3434	0.735	0.145	0	MG	CR788236.1	0	1.53722	0.314	0.017	0	MG	CR788236.1
ENSDARG00000094704~~bcl2a	0	1.00967	0.809	0.303	0	MG	bcl2a	1.59715e-37	0.885363	0.211	0.078	5.19393e-33	MG	bcl2a
ENSDARG00000094730~~acbd7	3.75374e-150	0.524454	0.166	0.026	1.22072e-145	MG	acbd7	9.11598e-100	1.11385	0.326	0.09	2.96452e-95	MG	acbd7
ENSDARG00000094857~~dio2	0	1.1157	0.36	0.018	0	MG	dio2	1.14619e-256	0.705406	0.116	0.005	3.72742e-252	MG	dio2
ENSDARG00000095557~~BX664610.1	1.84303e-235	0.687719	0.924	0.449	5.99353e-231	MG	BX664610.1	2.57319e-140	1.1775	0.665	0.237	8.36801e-136	MG	BX664610.1
ENSDARG00000095715~~BX465834.1	0	2.53835	1	0.353	0	MG	BX465834.1	0	2.15359	0.895	0.242	0	MG	BX465834.1
ENSDARG00000095906~~CR848047.1	0	2.01094	0.998	0.316	0	MG	CR848047.1	0	3.14917	0.968	0.186	0	MG	CR848047.1
ENSDARG00000096635~~si:ch211-122h15.4	0	2.43448	0.984	0.131	0	MG	si:ch211-122h15.4	0	2.32979	0.516	0.011	0	MG	si:ch211-122h15.4
ENSDARG00000096849~~si:dkey-16p21.8	0	1.07309	0.36	0.022	0	MG	si:dkey-16p21.8	3.49681e-45	0.771306	0.34	0.144	1.13716e-40	MG	si:dkey-16p21.8
ENSDARG00000096853~~BX572077.1	1.34491e-182	0.546976	0.179	0.024	4.37364e-178	MG	BX572077.1	3.08044e-36	0.536829	0.101	0.024	1.00176e-31	MG	BX572077.1
ENSDARG00000096867~~clmn	0	1.96305	0.888	0.074	0	MG	clmn	1.09229e-48	0.60725	0.131	0.031	3.55214e-44	MG	clmn
ENSDARG00000097057~~fxyd6l	0	2.77631	0.96	0.078	0	MG	fxyd6l	1.2713e-62	1.09658	0.602	0.35	4.13428e-58	MG	fxyd6l
ENSDARG00000097239~~si:ch73-31d8.2	0	0.916138	0.282	0.013	0	MG	si:ch73-31d8.2	2.62428e-247	0.942221	0.161	0.011	8.53417e-243	MG	si:ch73-31d8.2
ENSDARG00000097478~~qkia	0	1.67504	0.972	0.263	0	MG	qkia	1.35975e-164	1.48759	0.644	0.232	4.42191e-160	MG	qkia
ENSDARG00000097827~~lrp1aa	0	2.16251	0.943	0.176	0	MG	lrp1aa	5.78195e-164	1.33258	0.275	0.047	1.88029e-159	MG	lrp1aa
ENSDARG00000098114~~ctsa	8.51987e-167	0.59819	0.246	0.056	2.77066e-162	MG	ctsa	1.15392e-31	0.541885	0.123	0.037	3.75255e-27	MG	ctsa
ENSDARG00000098308~~CR936540.1	0	2.216	0.92	0.064	0	MG	CR936540.1	0	1.49659	0.268	0.004	0	MG	CR936540.1
ENSDARG00000098312~~scarb2a	0	1.8553	0.901	0.296	0	MG	scarb2a	4.10459e-139	1.6008	0.597	0.23	1.33481e-134	MG	scarb2a
ENSDARG00000098374~~ENSDARG00000098374	1.06912e-204	0.69746	0.366	0.101	3.47677e-200	MG	ENSDARG00000098374	1.18747e-178	0.790669	0.155	0.014	3.86167e-174	MG	ENSDARG00000098374
ENSDARG00000098512~~si:ch73-215f7.1	0	1.39448	0.981	0.344	0	MG	si:ch73-215f7.1	9.16343e-218	1.44957	0.848	0.302	2.97995e-213	MG	si:ch73-215f7.1
ENSDARG00000098578~~pdgfab	0	1.0511	0.324	0.005	0	MG	pdgfab	8.16774e-128	0.655234	0.119	0.012	2.65615e-123	MG	pdgfab
ENSDARG00000098644~~si:ch211-126j24.1	0	1.66396	0.957	0.28	0	MG	si:ch211-126j24.1	1.73454e-16	0.604164	0.233	0.129	5.64071e-12	MG	si:ch211-126j24.1
ENSDARG00000098733~~pxdn	0	1.28172	0.528	0.047	0	MG	pxdn	1.89576e-156	0.672694	0.111	0.008	6.165e-152	MG	pxdn
ENSDARG00000098746~~dhrs13l1	0	1.28718	0.438	0.013	0	MG	dhrs13l1	5.75723e-159	0.924037	0.177	0.021	1.87225e-154	MG	dhrs13l1
ENSDARG00000098802~~map7d1a	9.14859e-185	0.674377	0.409	0.14	2.97512e-180	MG	map7d1a	8.66071e-21	0.557863	0.189	0.088	2.81646e-16	MG	map7d1a
ENSDARG00000099054~~BX088596.1	0	2.04677	0.668	0.008	0	MG	BX088596.1	1.13754e-211	0.889214	0.144	0.011	3.69926e-207	MG	BX088596.1
ENSDARG00000099093~~dock1	5.81275e-201	0.578825	0.975	0.433	1.89031e-196	MG	dock1	1.88079e-47	0.702427	0.523	0.267	6.11632e-43	MG	dock1
ENSDARG00000099137~~BX663503.3	0	1.48206	0.499	0.008	0	MG	BX663503.3	1.56037e-108	0.62043	0.11	0.012	5.07431e-104	MG	BX663503.3
ENSDARG00000099220~~BX571942.1	1.73807e-166	0.554064	0.839	0.442	5.6522e-162	MG	BX571942.1	3.44476e-126	1.2828	0.304	0.068	1.12024e-121	MG	BX571942.1
ENSDARG00000099265~~slc7a5	4.52726e-170	0.559532	0.794	0.382	1.47226e-165	MG	slc7a5	2.61547e-155	1.27652	0.34	0.071	8.50551e-151	MG	slc7a5
ENSDARG00000099339~~pacsin3	0	0.968414	0.766	0.201	0	MG	pacsin3	6.56453e-35	0.576577	0.275	0.116	2.13479e-30	MG	pacsin3
ENSDARG00000099389~~cdo1	0	0.80755	0.228	0.005	0	MG	cdo1	2.48535e-293	0.736495	0.132	0.006	8.08236e-289	MG	cdo1
ENSDARG00000099465~~rnf213a	0	1.03743	0.446	0.081	0	MG	rnf213a	4.13607e-232	0.932027	0.164	0.013	1.34505e-227	MG	rnf213a
ENSDARG00000099510~~cnn3a	0	1.16875	0.435	0.03	0	MG	cnn3a	4.29318e-155	0.93174	0.189	0.024	1.39614e-150	MG	cnn3a
ENSDARG00000099555~~foxo1a	0	0.885199	0.827	0.336	0	MG	foxo1a	5.22811e-45	0.540665	0.099	0.02	1.70018e-40	MG	foxo1a
ENSDARG00000099767~~fhdc2	3.70504e-210	0.666772	0.239	0.041	1.20488e-205	MG	fhdc2	0	0.685637	0.101	0.001	0	MG	fhdc2
ENSDARG00000099776~~glula	0	3.66004	0.969	0.076	0	MG	glula	0	2.43614	0.376	0.037	0	MG	glula
ENSDARG00000099844~~GNAZ	7.06058e-297	0.797465	0.392	0.082	2.2961e-292	MG	GNAZ	8.3787e-69	0.831684	0.182	0.042	2.72475e-64	MG	GNAZ
ENSDARG00000099871~~myo7aa	0	1.4093	0.9	0.178	0	MG	myo7aa	3.63662e-204	1.06739	0.194	0.02	1.18263e-199	MG	myo7aa
ENSDARG00000100003~~glulb	3.69783e-181	0.539138	0.196	0.03	1.20254e-176	MG	glulb	4.58761e-102	1.30144	0.269	0.065	1.49189e-97	MG	glulb
ENSDARG00000100055~~tox2	0	1.37387	0.955	0.331	0	MG	tox2	1.17814e-150	1.33869	0.662	0.246	3.83131e-146	MG	tox2
ENSDARG00000100057~~ppfibp1b	0	1.33143	0.608	0.086	0	MG	ppfibp1b	8.49122e-126	1.04753	0.242	0.046	2.76135e-121	MG	ppfibp1b
ENSDARG00000100222~~utrn	0	1.25325	0.758	0.16	0	MG	utrn	2.7276e-74	0.883689	0.238	0.064	8.87016e-70	MG	utrn
ENSDARG00000100729~~tln1	4.94072e-292	0.80912	0.65	0.223	1.60672e-287	MG	tln1	4.0979e-209	1.30975	0.358	0.063	1.33264e-204	MG	tln1
ENSDARG00000100731~~zgc:101540	5.68692e-252	0.775229	0.347	0.077	1.84939e-247	MG	zgc:101540	5.32157e-83	0.581491	0.098	0.012	1.73058e-78	MG	zgc:101540
ENSDARG00000100897~~pdgfrb	0	2.67904	0.962	0.079	0	MG	pdgfrb	0	1.36597	0.247	0.005	0	MG	pdgfrb
ENSDARG00000100913~~arhgef12b	4.85124e-291	0.818665	0.727	0.275	1.57762e-286	MG	arhgef12b	8.53708e-65	0.980788	0.37	0.145	2.77626e-60	MG	arhgef12b
ENSDARG00000101175~~mcu	5.02392e-146	0.583457	0.229	0.056	1.63378e-141	MG	mcu	4.01312e-57	0.534638	0.105	0.019	1.30507e-52	MG	mcu
ENSDARG00000101280~~vat1l	0	1.60153	0.654	0.055	0	MG	vat1l	1.32558e-156	0.565637	0.09	0.006	4.31077e-152	MG	vat1l
ENSDARG00000101443~~relch	0	1.22873	0.97	0.477	0	MG	relch	1.5397e-75	1.06475	0.388	0.145	5.0071e-71	MG	relch
ENSDARG00000101584~~CU467822.2	0	2.61136	1	0.517	0	MG	CU467822.2	0	3.36262	0.95	0.215	0	MG	CU467822.2
ENSDARG00000101869~~MAGI3	0	0.885087	0.997	0.484	0	MG	MAGI3	0	2.74245	0.919	0.165	0	MG	MAGI3
ENSDARG00000101914~~metrnla	0	0.900443	0.326	0.037	0	MG	metrnla	0	1.45804	0.272	0.019	0	MG	metrnla
ENSDARG00000102024~~chmp6b	0	1.09402	0.846	0.27	0	MG	chmp6b	7.57965e-37	0.755438	0.215	0.081	2.4649e-32	MG	chmp6b
ENSDARG00000102082~~nr3c2	0	1.47084	0.992	0.453	0	MG	nr3c2	2.67344e-162	1.28651	0.529	0.149	8.69404e-158	MG	nr3c2
ENSDARG00000102142~~ece2b	0	1.3302	0.751	0.197	0	MG	ece2b	1.2132e-62	0.765372	0.194	0.05	3.94531e-58	MG	ece2b
ENSDARG00000102180~~shroom3	0	1.67883	0.885	0.126	0	MG	shroom3	0	1.82486	0.457	0.059	0	MG	shroom3
ENSDARG00000102445~~si:dkey-22o22.2	0	0.811547	0.917	0.37	0	MG	si:dkey-22o22.2	1.11622e-42	0.660644	0.141	0.038	3.62993e-38	MG	si:dkey-22o22.2
ENSDARG00000102453~~slc1a2b	0	4.11997	1	0.066	0	MG	slc1a2b	0	4.77931	0.874	0.058	0	MG	slc1a2b
ENSDARG00000102566~~fam102aa	0	1.81219	0.849	0.112	0	MG	fam102aa	0	1.5976	0.34	0.032	0	MG	fam102aa
ENSDARG00000102742~~bmpr1bb	0	0.933009	0.267	0.018	0	MG	bmpr1bb	7.51651e-63	0.558705	0.092	0.014	2.44437e-58	MG	bmpr1bb
ENSDARG00000102829~~cobll1b	0	2.39313	0.903	0.044	0	MG	cobll1b	0	1.15895	0.189	0.007	0	MG	cobll1b
ENSDARG00000102855~~neo1a	0	1.22518	0.991	0.415	0	MG	neo1a	2.03506e-182	1.47126	0.635	0.204	6.618e-178	MG	neo1a
ENSDARG00000103026~~p3h2	0	1.29639	0.735	0.145	0	MG	p3h2	7.46131e-166	0.945821	0.179	0.02	2.42642e-161	MG	p3h2
ENSDARG00000103109~~chl1b	0	0.825756	0.817	0.247	0	MG	chl1b	0	1.68788	0.373	0.046	0	MG	chl1b
ENSDARG00000103413~~zgc:109949	7.79654e-239	0.720677	0.576	0.195	2.53544e-234	MG	zgc:109949	5.54549e-85	0.800056	0.2	0.043	1.80339e-80	MG	zgc:109949
ENSDARG00000103607~~wtip	6.40731e-203	0.661447	0.364	0.098	2.08366e-198	MG	wtip	1.05737e-63	0.689192	0.141	0.029	3.43858e-59	MG	wtip
ENSDARG00000103615~~si:dkey-31j3.11	0	1.22326	0.704	0.153	0	MG	si:dkey-31j3.11	0	1.2163	0.241	0.018	0	MG	si:dkey-31j3.11
ENSDARG00000103638~~CR936977.2	0	2.08988	0.849	0.036	0	MG	CR936977.2	2.35133e-160	1.00199	0.146	0.014	7.64652e-156	MG	CR936977.2
ENSDARG00000103648~~znf536	0	1.08608	1	0.607	0	MG	znf536	0	3.64409	0.946	0.095	0	MG	znf536
ENSDARG00000103699~~ptpn13	0	1.77476	0.998	0.462	0	MG	ptpn13	0	2.43937	0.765	0.139	0	MG	ptpn13
ENSDARG00000103800~~prkar1b	0	1.90789	0.933	0.176	0	MG	prkar1b	4.06222e-178	1.3917	0.301	0.051	1.32103e-173	MG	prkar1b
ENSDARG00000103823~~rbms1b	4.13547e-263	0.773018	0.41	0.101	1.34485e-258	MG	rbms1b	2.7747e-57	0.719628	0.188	0.05	9.02332e-53	MG	rbms1b
ENSDARG00000104100~~bmpr1ba	0	1.72514	0.615	0.077	0	MG	bmpr1ba	3.43801e-28	0.713685	0.161	0.059	1.11804e-23	MG	bmpr1ba
ENSDARG00000104255~~arhgap27	0	1.60202	0.64	0.019	0	MG	arhgap27	0	1.08469	0.176	0.003	0	MG	arhgap27
ENSDARG00000104393~~npr2	6.5359e-290	0.765057	0.29	0.04	2.12548e-285	MG	npr2	9.55374e-92	0.717144	0.122	0.017	3.10688e-87	MG	npr2
ENSDARG00000104470~~syngr2b	0	1.26724	0.447	0.02	0	MG	syngr2b	0	2.26237	0.526	0.02	0	MG	syngr2b
ENSDARG00000104555~~sh2d3cb	0	1.53052	0.645	0.048	0	MG	sh2d3cb	0	0.683833	0.089	0.002	0	MG	sh2d3cb
ENSDARG00000104568~~BX571715.1	0	0.83711	0.431	0.093	0	MG	BX571715.1	4.41465e-249	0.805353	0.144	0.009	1.43564e-244	MG	BX571715.1
ENSDARG00000104845~~mipol1	0	0.920078	0.533	0.145	0	MG	mipol1	1.31373e-84	0.753879	0.15	0.026	4.27224e-80	MG	mipol1
ENSDARG00000105088~~tenm4	0	2.2806	0.99	0.264	0	MG	tenm4	1.28136e-170	1.20401	0.647	0.21	4.16698e-166	MG	tenm4
ENSDARG00000105209~~ENSDARG00000105209	0	1.13959	0.668	0.131	0	MG	ENSDARG00000105209	1.66418e-220	1.40691	0.356	0.06	5.4119e-216	MG	ENSDARG00000105209
ENSDARG00000105301~~sox8a	0	1.32764	0.622	0.094	0	MG	sox8a	0	0.601675	0.098	0.001	0	MG	sox8a
ENSDARG00000105586~~BX255967.1	0	1.48925	0.607	0.043	0	MG	BX255967.1	1.33236e-79	0.621294	0.098	0.012	4.33285e-75	MG	BX255967.1
ENSDARG00000106873~~LO018188.1	0	2.0741	0.85	0.054	0	MG	LO018188.1	0	1.18909	0.189	0.005	0	MG	LO018188.1
ENSDARG00000109527~~BX000363.2	0	1.41898	0.445	0.02	0	MG	BX000363.2	0	2.38867	0.6	0.036	0	MG	BX000363.2
ENSDARG00000109820~~NPAS3	0	2.10792	0.995	0.265	0	MG	NPAS3	0	2.85227	0.726	0.072	0	MG	NPAS3
ENSDARG00000110160~~SBSPON	0	1.3963	0.465	0.012	0	MG	SBSPON	0	0.538162	0.08	0.001	0	MG	SBSPON
ENSDARG00000112032~~HEPACAM	0	1.88945	0.873	0.083	0	MG	HEPACAM	0	1.57344	0.278	0.001	0	MG	HEPACAM
ENSDARG00000112977~~CABZ01061591.1	0	1.3648	0.611	0.058	0	MG	CABZ01061591.1	0	1.3069	0.26	0.023	0	MG	CABZ01061591.1
ENSDARG00000115657~~prkcaa	4.35752e-231	0.617029	0.48	0.139	1.41706e-226	MG	prkcaa	7.53835e-115	0.579071	0.319	0.074	2.45147e-110	MG	prkcaa
ENSDARG00000116484~~BX465198.2	3.16207e-261	0.793328	0.319	0.061	1.02831e-256	MG	BX465198.2	1.14012e-96	0.938923	0.235	0.051	3.70768e-92	MG	BX465198.2
ENSDARG00000116863~~CU984579.1	1.75695e-194	0.610608	0.211	0.033	5.71359e-190	MG	CU984579.1	0	0.528942	0.081	0.001	0	MG	CU984579.1
ENSDARG00000117155~~BX323087.1	0	1.29535	0.435	0.005	0	MG	BX323087.1	0	0.87429	0.131	0.002	0	MG	BX323087.1
ENSDARG00000000380~~pde6a	4.74685e-174	1.10076	0.143	0.013	1.54368e-169	Rod	pde6a	0	3.02913	0.603	0.01	0	Rod	pde6a
ENSDARG00000001463~~tdh2	0	2.40329	0.769	0.144	0	Rod	tdh2	0	2.70653	0.864	0.109	0	Rod	tdh2
ENSDARG00000001913~~palmda	1.32742e-202	1.05031	0.312	0.076	4.31678e-198	Rod	palmda	2.59495e-200	1.08272	0.251	0.027	8.43878e-196	Rod	palmda
ENSDARG00000001976~~fkbp16	0	1.48092	0.856	0.277	0	Rod	fkbp16	4.70026e-228	1.62579	0.607	0.126	1.52852e-223	Rod	fkbp16
ENSDARG00000002193~~rho	8.41651e-264	3.97404	0.253	0.034	2.73705e-259	Rod	rho	0	7.74689	0.908	0.233	0	Rod	rho
ENSDARG00000002230~~sypb	0	1.75232	0.677	0.168	0	Rod	sypb	2.37807e-246	1.78981	0.91	0.297	7.73349e-242	Rod	sypb
ENSDARG00000002362~~ubald1a	6.93591e-27	0.560759	0.251	0.172	2.25556e-22	Rod	ubald1a	1.92872e-122	1.64141	0.372	0.084	6.2722e-118	Rod	ubald1a
ENSDARG00000002564~~syngr1a	3.46191e-84	0.75273	0.282	0.122	1.12581e-79	Rod	syngr1a	3.03301e-45	0.743656	0.364	0.14	9.86335e-41	Rod	syngr1a
ENSDARG00000003210~~ano2a	5.64386e-120	0.754243	0.156	0.029	1.83538e-115	Rod	ano2a	1.53519e-123	0.820376	0.188	0.024	4.99243e-119	Rod	ano2a
ENSDARG00000003449~~pde10a	3.76016e-57	0.773364	0.3	0.18	1.2228e-52	Rod	pde10a	7.80951e-97	0.904474	0.232	0.042	2.53965e-92	Rod	pde10a
ENSDARG00000004017~~spag1a	2.35527e-202	1.09424	0.356	0.106	7.65934e-198	Rod	spag1a	2.32206e-31	0.552186	0.195	0.065	7.55132e-27	Rod	spag1a
ENSDARG00000004074~~bach2b	7.42177e-290	0.735638	0.981	0.833	2.41356e-285	Rod	bach2b	6.21792e-32	0.72935	0.715	0.497	2.02207e-27	Rod	bach2b
ENSDARG00000004472~~atat1	6.809e-121	0.85566	0.485	0.299	2.21429e-116	Rod	atat1	3.00583e-55	0.829268	0.243	0.068	9.77497e-51	Rod	atat1
ENSDARG00000004643~~cdhr1a	7.38961e-195	1.0327	0.286	0.067	2.4031e-190	Rod	cdhr1a	0	1.4374	0.416	0.042	0	Rod	cdhr1a
ENSDARG00000004721~~mpp5b	0	1.3371	0.371	0.054	0	Rod	mpp5b	4.44709e-91	0.550759	0.132	0.016	1.44619e-86	Rod	mpp5b
ENSDARG00000004836~~dnajc5ab	1.46822e-93	0.707035	0.481	0.291	4.77466e-89	Rod	dnajc5ab	2.71673e-24	0.575714	0.439	0.239	8.83482e-20	Rod	dnajc5ab
ENSDARG00000004861~~esrrga	3.24134e-218	1.01165	0.483	0.155	1.05408e-213	Rod	esrrga	7.60673e-99	0.837386	0.318	0.071	2.47371e-94	Rod	esrrga
ENSDARG00000005092~~cep89	1.11823e-72	0.73348	0.295	0.145	3.63647e-68	Rod	cep89	2.3902e-49	0.742751	0.178	0.044	7.77294e-45	Rod	cep89
ENSDARG00000005163~~efr3a	1.13532e-194	1.05756	0.453	0.181	3.69206e-190	Rod	efr3a	1.83894e-200	1.20115	0.291	0.036	5.98023e-196	Rod	efr3a
ENSDARG00000005652~~man1a1	0	1.7248	0.662	0.225	0	Rod	man1a1	2.21261e-149	1.25281	0.521	0.128	7.19539e-145	Rod	man1a1
ENSDARG00000005800~~ampd3a	1.10081e-62	0.558593	0.153	0.05	3.57984e-58	Rod	ampd3a	1.07517e-44	0.705173	0.201	0.056	3.49646e-40	Rod	ampd3a
ENSDARG00000005916~~srpk3	2.9671e-191	1.04857	0.41	0.149	9.649e-187	Rod	srpk3	1.47024e-25	0.563729	0.197	0.074	4.78122e-21	Rod	srpk3
ENSDARG00000006607~~gpr27	0	1.81583	0.501	0.036	0	Rod	gpr27	3.99275e-59	0.714106	0.161	0.032	1.29844e-54	Rod	gpr27
ENSDARG00000007220~~ncam1b	0	2.33039	0.997	0.591	0	Rod	ncam1b	0	2.18129	0.874	0.197	0	Rod	ncam1b
ENSDARG00000007682~~ppdpfa	1.10381e-151	1.08158	0.426	0.187	3.58958e-147	Rod	ppdpfa	8.49558e-296	1.85631	0.651	0.123	2.76276e-291	Rod	ppdpfa
ENSDARG00000008127~~pcdh15b	9.48525e-156	0.99936	0.437	0.161	3.0846e-151	Rod	pcdh15b	0	2.44042	0.759	0.083	0	Rod	pcdh15b
ENSDARG00000008487~~dmd	4.08564e-196	1.0459	0.57	0.306	1.32865e-191	Rod	dmd	6.87514e-111	1.20655	0.506	0.152	2.2358e-106	Rod	dmd
ENSDARG00000008788~~camk1gb	8.64634e-82	0.809894	0.26	0.109	2.81179e-77	Rod	camk1gb	1.28374e-149	0.856964	0.201	0.023	4.17473e-145	Rod	camk1gb
ENSDARG00000009299~~dusp8a	0	1.38007	0.897	0.462	0	Rod	dusp8a	6.64591e-64	1.01157	0.521	0.217	2.16125e-59	Rod	dusp8a
ENSDARG00000009418~~mef2cb	1.37291e-118	0.900817	0.403	0.18	4.4647e-114	Rod	mef2cb	4.31557e-165	1.21228	0.475	0.098	1.40342e-160	Rod	mef2cb
ENSDARG00000009901~~slc38a5a	7.48883e-49	0.550761	0.147	0.055	2.43537e-44	Rod	slc38a5a	1.66069e-186	1.05721	0.268	0.032	5.40056e-182	Rod	slc38a5a
ENSDARG00000010042~~dnm1a	3.45618e-113	0.821187	0.474	0.268	1.12395e-108	Rod	dnm1a	1.12796e-76	0.998925	0.393	0.12	3.66812e-72	Rod	dnm1a
ENSDARG00000010186~~myo3a	0	2.11045	0.729	0.132	0	Rod	myo3a	0	2.30986	0.546	0.025	0	Rod	myo3a
ENSDARG00000010454~~guca1a	1.26899e-228	0.984695	0.168	0.012	4.12677e-224	Rod	guca1a	0	1.7949	0.293	0.004	0	Rod	guca1a
ENSDARG00000010602~~zgc:112294	7.71142e-248	1.09873	0.535	0.191	2.50775e-243	Rod	zgc:112294	9.95772e-125	1.07436	0.308	0.057	3.23825e-120	Rod	zgc:112294
ENSDARG00000010710~~msi1	0	1.39719	1	0.858	0	Rod	msi1	3.2359e-239	1.90322	0.941	0.381	1.05231e-234	Rod	msi1
ENSDARG00000010933~~cacna1fa	2.90106e-238	1.11665	0.291	0.055	9.43423e-234	Rod	cacna1fa	4.87797e-187	1.09678	0.28	0.035	1.58631e-182	Rod	cacna1fa
ENSDARG00000011671~~pde6b	0	1.69457	0.215	0.01	0	Rod	pde6b	0	3.48657	0.688	0.004	0	Rod	pde6b
ENSDARG00000011886~~pdca	0	1.75814	0.508	0.057	0	Rod	pdca	0	1.7631	0.381	0.003	0	Rod	pdca
ENSDARG00000011948~~insra	3.87639e-207	1.02369	0.551	0.283	1.2606e-202	Rod	insra	1.23441e-28	0.715882	0.322	0.149	4.01431e-24	Rod	insra
ENSDARG00000011989~~crx	1.27776e-181	0.955496	0.51	0.221	4.15526e-177	Rod	crx	8.72032e-84	1.05686	0.602	0.233	2.83585e-79	Rod	crx
ENSDARG00000012125~~cnga1b	0	1.31862	0.274	0.028	0	Rod	cnga1b	0	3.73449	0.837	0.006	0	Rod	cnga1b
ENSDARG00000012126~~zgc:109965	0	1.70954	0.802	0.243	0	Rod	zgc:109965	0	2.02055	0.726	0.142	0	Rod	zgc:109965
ENSDARG00000012340~~ptpn11b	9.44749e-114	0.736086	0.544	0.354	3.07232e-109	Rod	ptpn11b	1.11856e-73	0.85473	0.295	0.076	3.63754e-69	Rod	ptpn11b
ENSDARG00000012468~~aacs	2.96367e-50	0.649049	0.293	0.172	9.63786e-46	Rod	aacs	2.91845e-89	0.930474	0.276	0.06	9.49078e-85	Rod	aacs
ENSDARG00000012610~~saga	0	2.3311	0.476	0.025	0	Rod	saga	0	4.3947	0.864	0.017	0	Rod	saga
ENSDARG00000012763~~arl13b	2.70695e-192	1.05845	0.419	0.155	8.80301e-188	Rod	arl13b	2.41171e-101	1.08999	0.433	0.121	7.84289e-97	Rod	arl13b
ENSDARG00000013393~~guca1b	2.91974e-239	0.858257	0.141	0.004	9.49501e-235	Rod	guca1b	0	2.13463	0.441	0.004	0	Rod	guca1b
ENSDARG00000013730~~slc4a4a	0	1.23222	0.841	0.433	0	Rod	slc4a4a	0	1.94089	0.736	0.117	0	Rod	slc4a4a
ENSDARG00000014806~~hacd2	1.48409e-90	0.768745	0.433	0.267	4.82626e-86	Rod	hacd2	8.8262e-122	1.35522	0.619	0.217	2.87028e-117	Rod	hacd2
ENSDARG00000014840~~prph2b	2.54542e-124	0.585649	0.1	0.008	8.27772e-120	Rod	prph2b	1.29764e-301	1.51108	0.54	0.078	4.21992e-297	Rod	prph2b
ENSDARG00000015404~~arl3l2	4.76309e-53	0.509431	0.105	0.029	1.54896e-48	Rod	arl3l2	1.91055e-149	0.781722	0.193	0.021	6.21309e-145	Rod	arl3l2
ENSDARG00000015425~~slc24a4a	0	3.07787	0.849	0.088	0	Rod	slc24a4a	1.32636e-191	1.43043	0.301	0.04	4.31334e-187	Rod	slc24a4a
ENSDARG00000015531~~slc4a8	8.29973e-124	0.851935	0.216	0.056	2.69907e-119	Rod	slc4a8	2.5335e-147	0.547674	0.084	0.004	8.23894e-143	Rod	slc4a8
ENSDARG00000015627~~rgs6	5.4105e-70	0.729831	0.21	0.083	1.75949e-65	Rod	rgs6	1.66454e-279	1.3342	0.28	0.024	5.41308e-275	Rod	rgs6
ENSDARG00000015931~~snap91b	2.04731e-171	0.992688	0.472	0.216	6.65784e-167	Rod	snap91b	3.89724e-34	0.619579	0.27	0.102	1.26738e-29	Rod	snap91b
ENSDARG00000016213~~zmp:0000001048	4.36245e-65	0.541233	0.115	0.029	1.41867e-60	Rod	zmp:0000001048	0	1.38754	0.301	0.013	0	Rod	zmp:0000001048
ENSDARG00000016429~~farp2	0	1.70823	0.951	0.386	0	Rod	farp2	9.81818e-125	1.34365	0.521	0.151	3.19287e-120	Rod	farp2
ENSDARG00000016464~~cdc42bpab	0	1.28845	0.673	0.288	0	Rod	cdc42bpab	3.56159e-56	0.896912	0.307	0.097	1.15823e-51	Rod	cdc42bpab
ENSDARG00000016528~~wdcp	6.15159e-95	0.542274	0.089	0.01	2.0005e-90	Rod	wdcp	1.21664e-126	0.670579	0.134	0.012	3.95651e-122	Rod	wdcp
ENSDARG00000016551~~iqsec1b	0	1.26237	0.934	0.707	0	Rod	iqsec1b	6.86541e-140	1.44825	0.77	0.303	2.23263e-135	Rod	iqsec1b
ENSDARG00000016573~~mroh1	1.00968e-41	0.541082	0.401	0.288	3.28346e-37	Rod	mroh1	6.97461e-29	0.52938	0.117	0.031	2.26814e-24	Rod	mroh1
ENSDARG00000017004~~myo10	0	1.79127	0.77	0.255	0	Rod	myo10	9.32843e-191	1.18159	0.228	0.024	3.0336e-186	Rod	myo10
ENSDARG00000017311~~gpsm2	3.81282e-65	0.731256	0.207	0.088	1.23993e-60	Rod	gpsm2	0	1.80846	0.446	0.039	0	Rod	gpsm2
ENSDARG00000017391~~unc13ba	2.50192e-205	1.31842	0.33	0.086	8.13626e-201	Rod	unc13ba	0	1.77436	0.59	0.087	0	Rod	unc13ba
ENSDARG00000017398~~slc44a5a	0	1.92015	0.996	0.347	0	Rod	slc44a5a	0	1.72769	0.648	0.1	0	Rod	slc44a5a
ENSDARG00000017446~~camk1db	9.08791e-110	0.93713	0.359	0.181	2.95539e-105	Rod	camk1db	0	1.64857	0.464	0.055	0	Rod	camk1db
ENSDARG00000017901~~tln2a	4.7221e-61	0.711823	0.268	0.137	1.53563e-56	Rod	tln2a	1.1014e-13	0.524215	0.165	0.077	3.58174e-09	Rod	tln2a
ENSDARG00000018329~~gc2	3.92642e-161	0.606186	0.099	0.004	1.27687e-156	Rod	gc2	0	1.07445	0.195	0.002	0	Rod	gc2
ENSDARG00000018460~~mbnl2	0	2.47009	0.889	0.452	0	Rod	mbnl2	0	3.7218	0.858	0.109	0	Rod	mbnl2
ENSDARG00000018742~~psme4b	1.08818e-30	0.527027	0.374	0.306	3.53876e-26	Rod	psme4b	1.37219e-69	1.07453	0.452	0.169	4.46235e-65	Rod	psme4b
ENSDARG00000019235~~sema3aa	4.95015e-184	0.914221	0.526	0.204	1.60979e-179	Rod	sema3aa	3.74309e-205	1.47915	0.481	0.088	1.21725e-200	Rod	sema3aa
ENSDARG00000019426~~trioa	3.07782e-239	0.615664	0.858	0.75	1.00091e-234	Rod	trioa	1.98625e-36	0.803425	0.577	0.325	6.45928e-32	Rod	trioa
ENSDARG00000019566~~neurod1	0	1.37153	0.963	0.352	0	Rod	neurod1	2.74075e-42	0.630746	0.638	0.334	8.91292e-38	Rod	neurod1
ENSDARG00000019752~~rom1a	0	1.73469	0.221	0.009	0	Rod	rom1a	0	3.90587	0.762	0.007	0	Rod	rom1a
ENSDARG00000020000~~sh3bp4a	0	1.32486	0.762	0.311	0	Rod	sh3bp4a	4.88472e-35	0.676211	0.308	0.124	1.58851e-30	Rod	sh3bp4a
ENSDARG00000020777~~cep85l	0	1.79509	0.992	0.434	0	Rod	cep85l	1.88385e-69	1.02636	0.527	0.218	6.12627e-65	Rod	cep85l
ENSDARG00000020814~~faimb	5.6438e-105	0.580541	0.105	0.013	1.83536e-100	Rod	faimb	0	1.50197	0.349	0.014	0	Rod	faimb
ENSDARG00000022045~~map1ab	0	2.90424	0.988	0.306	0	Rod	map1ab	5.70977e-274	1.16872	0.161	0.008	1.85682e-269	Rod	map1ab
ENSDARG00000023600~~sh3gl2a	2.04392e-24	0.536696	0.271	0.196	6.64681e-20	Rod	sh3gl2a	3.27143e-35	0.5989	0.192	0.06	1.06387e-30	Rod	sh3gl2a
ENSDARG00000023868~~si:dkey-172h23.2	0	1.42406	0.415	0.09	0	Rod	si:dkey-172h23.2	0	1.66344	0.466	0.055	0	Rod	si:dkey-172h23.2
ENSDARG00000023886~~cacna2d4b	2.13999e-52	0.525168	0.152	0.055	6.95925e-48	Rod	cacna2d4b	4.97264e-133	1.09687	0.366	0.072	1.6171e-128	Rod	cacna2d4b
ENSDARG00000024564~~sccpdhb	4.68892e-203	1.05429	0.255	0.049	1.52484e-198	Rod	sccpdhb	2.4529e-47	0.708667	0.192	0.05	7.97683e-43	Rod	sccpdhb
ENSDARG00000024694~~myo1b	0	1.10989	0.997	0.752	0	Rod	myo1b	8.68126e-51	0.716217	0.655	0.331	2.82315e-46	Rod	myo1b
ENSDARG00000024746~~hsp90aa1.2	7.15252e-134	0.815949	0.572	0.37	2.326e-129	Rod	hsp90aa1.2	0	2.20568	0.732	0.155	0	Rod	hsp90aa1.2
ENSDARG00000026875~~tlcd3ba	9.23052e-277	1.2148	0.496	0.171	3.00176e-272	Rod	tlcd3ba	1.11484e-19	0.558215	0.312	0.162	3.62547e-15	Rod	tlcd3ba
ENSDARG00000026926~~rom1b	0	2.23845	0.297	0.011	0	Rod	rom1b	0	5.36706	0.912	0.026	0	Rod	rom1b
ENSDARG00000027495~~elovl4b	0	1.9401	0.595	0.129	0	Rod	elovl4b	0	3.33217	0.985	0.205	0	Rod	elovl4b
ENSDARG00000028048~~rdh8a	1.35613e-84	0.733118	0.2	0.067	4.41012e-80	Rod	rdh8a	6.50097e-236	1.55252	0.475	0.078	2.11412e-231	Rod	rdh8a
ENSDARG00000028118~~dscamb	0	1.46412	1	0.374	0	Rod	dscamb	1.96412e-146	0.798001	0.906	0.293	6.3873e-142	Rod	dscamb
ENSDARG00000028469~~rps6ka2	1.82289e-163	0.92283	0.248	0.057	5.92804e-159	Rod	rps6ka2	2.52714e-93	0.899192	0.253	0.05	8.21827e-89	Rod	rps6ka2
ENSDARG00000028793~~nlk2	3.76414e-215	0.653465	0.822	0.71	1.2241e-210	Rod	nlk2	2.25353e-90	0.981062	0.559	0.195	7.32848e-86	Rod	nlk2
ENSDARG00000029234~~stxbp5b	3.16447e-58	0.651257	0.41	0.294	1.02909e-53	Rod	stxbp5b	9.37879e-62	0.843647	0.316	0.096	3.04998e-57	Rod	stxbp5b
ENSDARG00000029482~~ush2a	0	1.95593	1	0.334	0	Rod	ush2a	0	2.05576	0.864	0.165	0	Rod	ush2a
ENSDARG00000029898~~cnga1a	0	1.89898	0.481	0.029	0	Rod	cnga1a	0	3.30998	0.728	0.004	0	Rod	cnga1a
ENSDARG00000030750~~gabrr3b	1.28555e-302	1.2121	0.361	0.065	4.18061e-298	Rod	gabrr3b	1.38389e-58	0.649633	0.201	0.046	4.50041e-54	Rod	gabrr3b
ENSDARG00000031618~~unm-sa1261	7.98932e-46	0.546313	0.128	0.047	2.59813e-41	Rod	unm-sa1261	2.37513e-96	0.712428	0.174	0.025	7.72392e-92	Rod	unm-sa1261
ENSDARG00000032056~~arl6	2.89217e-38	0.539106	0.161	0.074	9.40535e-34	Rod	arl6	2.87121e-113	1.04724	0.31	0.063	9.33717e-109	Rod	arl6
ENSDARG00000032761~~pde4d	2.08369e-263	1.19655	0.488	0.173	6.77616e-259	Rod	pde4d	6.68109e-180	1.24742	0.266	0.033	2.17269e-175	Rod	pde4d
ENSDARG00000032802~~ktn1	1.40545e-58	0.555794	0.509	0.441	4.57053e-54	Rod	ktn1	4.75233e-34	0.685855	0.636	0.378	1.54546e-29	Rod	ktn1
ENSDARG00000032849~~ndrg1a	0	1.51026	0.681	0.194	0	Rod	ndrg1a	2.03096e-297	1.55039	0.546	0.082	6.60469e-293	Rod	ndrg1a
ENSDARG00000032865~~pacsin1a	3.73849e-72	0.693358	0.434	0.293	1.21576e-67	Rod	pacsin1a	7.51092e-176	1.44871	0.496	0.108	2.44255e-171	Rod	pacsin1a
ENSDARG00000033978~~nxn	5.58653e-95	0.77533	0.46	0.285	1.81674e-90	Rod	nxn	4.08718e-47	0.864921	0.272	0.089	1.32915e-42	Rod	nxn
ENSDARG00000034007~~prom1b	0	2.68325	0.917	0.165	0	Rod	prom1b	0	1.8315	0.826	0.174	0	Rod	prom1b
ENSDARG00000034424~~atp1b2b	0	1.58617	0.63	0.156	0	Rod	atp1b2b	2.022e-306	1.62296	0.634	0.107	6.57556e-302	Rod	atp1b2b
ENSDARG00000034757~~zdhhc2	2.49074e-177	0.647503	0.104	0.003	8.09989e-173	Rod	zdhhc2	0	2.56714	0.625	0.008	0	Rod	zdhhc2
ENSDARG00000035360~~mink1	0	1.30947	0.716	0.305	0	Rod	mink1	1.10833e-138	1.1419	0.333	0.061	3.60429e-134	Rod	mink1
ENSDARG00000035398~~enc1	2.67701e-123	0.924776	0.244	0.075	8.70563e-119	Rod	enc1	6.44747e-25	0.537399	0.144	0.047	2.09672e-20	Rod	enc1
ENSDARG00000035470~~sh3glb2b	2.57103e-30	0.552861	0.215	0.13	8.36099e-26	Rod	sh3glb2b	3.21357e-21	0.592034	0.209	0.09	1.04505e-16	Rod	sh3glb2b
ENSDARG00000035622~~xbp1	1.25114e-88	0.773037	0.353	0.178	4.06872e-84	Rod	xbp1	2.54127e-139	1.54486	0.705	0.265	8.26421e-135	Rod	xbp1
ENSDARG00000035630~~ypel1	8.07252e-36	0.570511	0.3	0.198	2.62518e-31	Rod	ypel1	1.49994e-60	0.837796	0.262	0.072	4.8778e-56	Rod	ypel1
ENSDARG00000035706~~dock6	4.94692e-83	0.63304	0.536	0.423	1.60874e-78	Rod	dock6	5.93566e-113	1.3632	0.441	0.123	1.93028e-108	Rod	dock6
ENSDARG00000035798~~gngt1	6.66436e-155	1.1624	0.238	0.056	2.16725e-150	Rod	gngt1	0	3.94605	0.828	0.103	0	Rod	gngt1
ENSDARG00000035870~~laptm4b	0	1.26506	0.835	0.397	0	Rod	laptm4b	6.3343e-42	0.659979	0.483	0.215	2.05992e-37	Rod	laptm4b
ENSDARG00000035899~~lingo1b	2.03268e-66	0.54336	0.101	0.022	6.61026e-62	Rod	lingo1b	0	1.19376	0.239	0.014	0	Rod	lingo1b
ENSDARG00000036549~~agpat3	9.26202e-141	0.932835	0.436	0.211	3.01201e-136	Rod	agpat3	1.92347e-127	1.25833	0.577	0.175	6.25512e-123	Rod	agpat3
ENSDARG00000036577~~atp6v0cb	3.58939e-98	0.817221	0.386	0.197	1.16727e-93	Rod	atp6v0cb	3.0402e-39	0.548663	0.753	0.443	9.88673e-35	Rod	atp6v0cb
ENSDARG00000037020~~kif1b	0	0.85898	0.883	0.689	0	Rod	kif1b	3.81852e-37	0.777857	0.421	0.199	1.24178e-32	Rod	kif1b
ENSDARG00000037030~~casz1	0	3.12795	0.941	0.183	0	Rod	casz1	0	2.49165	0.753	0.095	0	Rod	casz1
ENSDARG00000037488~~canx	0	1.48108	0.987	0.657	0	Rod	canx	5.721e-63	1.48101	0.659	0.393	1.86047e-58	Rod	canx
ENSDARG00000037781~~acss2	1.03014e-88	0.734305	0.438	0.263	3.35003e-84	Rod	acss2	6.32594e-107	1.32572	0.446	0.128	2.0572e-102	Rod	acss2
ENSDARG00000038363~~drd4a	8.85627e-125	0.961572	0.318	0.128	2.88006e-120	Rod	drd4a	0	1.86557	0.46	0.029	0	Rod	drd4a
ENSDARG00000038378~~sagb	0	3.46452	0.664	0.012	0	Rod	sagb	0	5.37034	0.981	0.041	0	Rod	sagb
ENSDARG00000038655~~ajap1	0	2.09312	0.556	0.046	0	Rod	ajap1	0	1.87895	0.46	0.031	0	Rod	ajap1
ENSDARG00000038859~~rgs20	4.72995e-45	0.554154	0.158	0.066	1.53818e-40	Rod	rgs20	3.30866e-125	1.13053	0.404	0.091	1.07598e-120	Rod	rgs20
ENSDARG00000038862~~kcnb2	5.38074e-69	0.798531	0.232	0.1	1.74982e-64	Rod	kcnb2	0	1.86383	0.523	0.047	0	Rod	kcnb2
ENSDARG00000039502~~eef1a1a	1.36554e-33	0.579517	0.222	0.129	4.44073e-29	Rod	eef1a1a	1.71443e-121	1.11321	0.314	0.061	5.57532e-117	Rod	eef1a1a
ENSDARG00000039913~~tmem147	1.09737e-72	0.730957	0.322	0.168	3.56866e-68	Rod	tmem147	8.27992e-27	0.74143	0.527	0.327	2.69263e-22	Rod	tmem147
ENSDARG00000039931~~slc25a33	9.35472e-87	0.726711	0.164	0.045	3.04215e-82	Rod	slc25a33	1.02093e-73	0.655076	0.155	0.026	3.32006e-69	Rod	slc25a33
ENSDARG00000039943~~tent5ba	0	1.54458	0.442	0.062	0	Rod	tent5ba	1.47853e-142	1.07083	0.262	0.039	4.80819e-138	Rod	tent5ba
ENSDARG00000039966~~prom1a	0	0.841751	0.971	0.688	0	Rod	prom1a	0	2.4089	0.72	0.115	0	Rod	prom1a
ENSDARG00000040198~~fstl5	0	1.36836	0.961	0.366	0	Rod	fstl5	7.00742e-189	1.48111	0.858	0.288	2.27881e-184	Rod	fstl5
ENSDARG00000041078~~chka	2.58514e-68	0.764257	0.328	0.191	8.40687e-64	Rod	chka	1.26166e-261	1.36319	0.375	0.046	4.10291e-257	Rod	chka
ENSDARG00000041896~~dnajc5ga	2.7071e-129	0.922298	0.308	0.112	8.80349e-125	Rod	dnajc5ga	4.9163e-102	1.08485	0.356	0.088	1.59878e-97	Rod	dnajc5ga
ENSDARG00000042107~~cngb1b	3.58146e-221	0.957648	0.174	0.015	1.16469e-216	Rod	cngb1b	0	2.04204	0.519	0.037	0	Rod	cngb1b
ENSDARG00000042387~~zgc:77752	0	1.4703	0.301	0.002	0	Rod	zgc:77752	0	1.72576	0.387	0.002	0	Rod	zgc:77752
ENSDARG00000042652~~rreb1b	0	2.39803	0.979	0.304	0	Rod	rreb1b	4.36118e-15	0.507942	0.117	0.045	1.41826e-10	Rod	rreb1b
ENSDARG00000043317~~kita	0	1.56997	0.436	0.06	0	Rod	kita	0	0.835758	0.148	0.004	0	Rod	kita
ENSDARG00000043483~~otx5	1.1736e-156	0.956635	0.376	0.134	3.81654e-152	Rod	otx5	7.75776e-29	0.520704	0.381	0.176	2.52282e-24	Rod	otx5
ENSDARG00000043818~~CASKIN2	3.28832e-281	1.03518	0.726	0.26	1.06936e-276	Rod	CASKIN2	3.00099e-132	1.15847	0.312	0.056	9.75923e-128	Rod	CASKIN2
ENSDARG00000043847~~tmem244	1.44784e-100	0.799074	0.246	0.084	4.70839e-96	Rod	tmem244	1.38962e-270	1.43114	0.454	0.063	4.51903e-266	Rod	tmem244
ENSDARG00000043864~~nptnb	1.51502e-118	0.846478	0.289	0.101	4.92684e-114	Rod	nptnb	2.73645e-47	0.675111	0.339	0.121	8.89893e-43	Rod	nptnb
ENSDARG00000044199~~gnat1	1.13878e-218	1.50282	0.23	0.035	3.7033e-214	Rod	gnat1	0	4.79528	0.833	0.029	0	Rod	gnat1
ENSDARG00000044339~~rp2	1.2951e-120	0.754737	0.151	0.027	4.21166e-116	Rod	rp2	8.75367e-72	0.647752	0.149	0.024	2.84669e-67	Rod	rp2
ENSDARG00000044362~~unc119b	4.59184e-83	0.604283	0.5	0.269	1.49327e-78	Rod	unc119b	1.12461e-104	1.12674	0.521	0.164	3.65723e-100	Rod	unc119b
ENSDARG00000044684~~rbp4l	5.6897e-08	0.608951	0.092	0.06	0.00185029	Rod	rbp4l	2.4017e-279	2.08074	0.912	0.291	7.81033e-275	Rod	rbp4l
ENSDARG00000044808~~slc4a4b	7.02388e-154	0.992041	0.31	0.101	2.28417e-149	Rod	slc4a4b	4.2429e-62	0.652499	0.144	0.025	1.37979e-57	Rod	slc4a4b
ENSDARG00000044874~~zgc:92107	2.94052e-113	0.889219	0.346	0.157	9.56258e-109	Rod	zgc:92107	2.35923e-34	0.732495	0.239	0.088	7.67223e-30	Rod	zgc:92107
ENSDARG00000045156~~rgs9b	0	1.51691	0.339	0.022	0	Rod	rgs9b	0	2.05735	0.435	0.014	0	Rod	rgs9b
ENSDARG00000045675~~mdm1	1.66906e-33	0.500015	0.13	0.057	5.42779e-29	Rod	mdm1	7.41128e-92	0.634314	0.132	0.016	2.41015e-87	Rod	mdm1
ENSDARG00000045904~~nr2e3	0	1.41654	0.462	0.097	0	Rod	nr2e3	2.64676e-171	0.994028	0.222	0.024	8.60726e-167	Rod	nr2e3
ENSDARG00000052223~~rcvrna	4.80962e-186	1.06531	0.332	0.097	1.56409e-181	Rod	rcvrna	0	2.05947	0.638	0.086	0	Rod	rcvrna
ENSDARG00000052575~~arl13a	0	1.7968	0.831	0.186	0	Rod	arl13a	4.72488e-155	1.12732	0.349	0.06	1.53653e-150	Rod	arl13a
ENSDARG00000052866~~htt	4.06676e-131	0.863371	0.496	0.289	1.32251e-126	Rod	htt	1.57278e-43	0.855486	0.352	0.142	5.11467e-39	Rod	htt
ENSDARG00000053110~~pkib	5.32978e-233	1.13902	0.465	0.167	1.73324e-228	Rod	pkib	5.78959e-158	1.03879	0.224	0.027	1.88277e-153	Rod	pkib
ENSDARG00000053453~~mpp2a	1.10601e-231	1.15799	0.411	0.125	3.59674e-227	Rod	mpp2a	2.12538e-52	0.719377	0.209	0.054	6.91174e-48	Rod	mpp2a
ENSDARG00000053484~~syne2b	0	1.3218	0.657	0.228	0	Rod	syne2b	9.2069e-59	0.842883	0.351	0.115	2.99408e-54	Rod	syne2b
ENSDARG00000053746~~CABZ01084566.1	0	1.07348	0.191	0.001	0	Rod	CABZ01084566.1	0	1.8239	0.402	0.002	0	Rod	CABZ01084566.1
ENSDARG00000054323~~pparab	2.83406e-34	0.581959	0.186	0.099	9.21635e-30	Rod	pparab	1.28406e-71	0.681134	0.144	0.023	4.17576e-67	Rod	pparab
ENSDARG00000054458~~slmapa	3.46689e-235	0.807058	0.758	0.532	1.12743e-230	Rod	slmapa	2.3845e-24	0.602493	0.389	0.206	7.75441e-20	Rod	slmapa
ENSDARG00000054537~~nhsl1a	0	1.11737	0.748	0.467	0	Rod	nhsl1a	1.16117e-120	1.12738	0.301	0.057	3.77611e-116	Rod	nhsl1a
ENSDARG00000055565~~cacnb2b	1.54344e-163	0.789162	0.158	0.02	5.01927e-159	Rod	cacnb2b	4.63544e-108	1.01023	0.31	0.064	1.50745e-103	Rod	cacnb2b
ENSDARG00000055875~~pag1	0	2.57176	0.945	0.175	0	Rod	pag1	4.14192e-70	0.972311	0.521	0.197	1.34695e-65	Rod	pag1
ENSDARG00000056036~~stxbp1b	0	1.41408	0.766	0.233	0	Rod	stxbp1b	5.72497e-119	1.14003	0.625	0.197	1.86176e-114	Rod	stxbp1b
ENSDARG00000056133~~kitb	0	2.41774	0.814	0.071	0	Rod	kitb	0	1.42016	0.289	0.012	0	Rod	kitb
ENSDARG00000056206~~camk2g2	1.44084e-220	0.799139	0.728	0.488	4.68562e-216	Rod	camk2g2	7.61258e-20	0.555043	0.383	0.215	2.47561e-15	Rod	camk2g2
ENSDARG00000056267~~dixdc1b	0	1.33666	0.645	0.252	0	Rod	dixdc1b	7.32548e-24	0.641754	0.199	0.079	2.38225e-19	Rod	dixdc1b
ENSDARG00000056791~~pde6ga	0	1.82619	0.364	0.017	0	Rod	pde6ga	0	2.41465	0.364	0.004	0	Rod	pde6ga
ENSDARG00000056805~~plch2b	1.72135e-285	1.25229	0.448	0.123	5.59782e-281	Rod	plch2b	0	1.53003	0.381	0.025	0	Rod	plch2b
ENSDARG00000057055~~ndufs8b	3.89952e-120	0.503601	0.077	0.003	1.26812e-115	Rod	ndufs8b	0	1.02337	0.165	0.004	0	Rod	ndufs8b
ENSDARG00000057074~~rpgrb	1.47836e-206	1.0458	0.509	0.217	4.80761e-202	Rod	rpgrb	9.06253e-70	0.897424	0.295	0.08	2.94713e-65	Rod	rpgrb
ENSDARG00000057169~~abca4a	0	2.10133	0.667	0.089	0	Rod	abca4a	0	2.5668	0.711	0.046	0	Rod	abca4a
ENSDARG00000057427~~sv2ba	9.79976e-95	0.753636	0.289	0.112	3.18688e-90	Rod	sv2ba	8.84741e-254	1.50521	0.571	0.099	2.87718e-249	Rod	sv2ba
ENSDARG00000057921~~ccdc136b	3.37949e-26	0.521905	0.209	0.129	1.09901e-21	Rod	ccdc136b	1.23884e-39	0.605235	0.19	0.054	4.02872e-35	Rod	ccdc136b
ENSDARG00000058354~~selenot1a	9.37765e-183	1.03806	0.418	0.159	3.04961e-178	Rod	selenot1a	5.34187e-141	1.47714	0.762	0.308	1.73718e-136	Rod	selenot1a
ENSDARG00000058357~~ankrd33ba	7.92615e-164	0.917658	0.234	0.051	2.57758e-159	Rod	ankrd33ba	8.91826e-303	1.42934	0.352	0.036	2.90022e-298	Rod	ankrd33ba
ENSDARG00000058801~~rev3l	1.08348e-24	0.525411	0.255	0.18	3.52346e-20	Rod	rev3l	4.77115e-22	0.580892	0.247	0.112	1.55158e-17	Rod	rev3l
ENSDARG00000058803~~grk1a	5.50367e-180	0.757184	0.123	0.007	1.78979e-175	Rod	grk1a	0	2.41133	0.504	0.004	0	Rod	grk1a
ENSDARG00000058818~~rbm38	0	2.11477	0.896	0.248	0	Rod	rbm38	5.64863e-171	1.30924	0.268	0.036	1.83693e-166	Rod	rbm38
ENSDARG00000059438~~galnt18b	0	2.54259	0.94	0.567	0	Rod	galnt18b	2.0285e-267	2.0985	0.414	0.056	6.59667e-263	Rod	galnt18b
ENSDARG00000059600~~rabep1	4.66961e-30	0.533418	0.342	0.263	1.51856e-25	Rod	rabep1	3.25053e-22	0.544418	0.328	0.166	1.05707e-17	Rod	rabep1
ENSDARG00000059682~~slc43a3a	1.05948e-48	0.605793	0.197	0.09	3.44542e-44	Rod	slc43a3a	2.67137e-183	1.08551	0.285	0.036	8.68729e-179	Rod	slc43a3a
ENSDARG00000059729~~sec14l8	0	3.0129	0.989	0.229	0	Rod	sec14l8	0	3.29193	0.749	0.025	0	Rod	sec14l8
ENSDARG00000059801~~pdzd2	0	1.03669	0.994	0.473	0	Rod	pdzd2	1.83111e-52	0.594192	0.55	0.232	5.95475e-48	Rod	pdzd2
ENSDARG00000059911~~bbs7	3.50878e-28	0.502263	0.136	0.067	1.14106e-23	Rod	bbs7	1.61478e-40	0.550099	0.151	0.037	5.25125e-36	Rod	bbs7
ENSDARG00000060354~~samd7	0	2.26514	0.88	0.112	0	Rod	samd7	1.23197e-223	1.50686	0.383	0.054	4.00636e-219	Rod	samd7
ENSDARG00000060751~~taok3a	1.17583e-212	0.672426	0.834	0.632	3.8238e-208	Rod	taok3a	4.4959e-28	0.51252	0.211	0.077	1.46207e-23	Rod	taok3a
ENSDARG00000060813~~plekha7a	0	1.26594	0.79	0.343	0	Rod	plekha7a	1.28352e-95	0.959662	0.241	0.046	4.174e-91	Rod	plekha7a
ENSDARG00000060925~~jarid2a	1.89301e-169	0.927339	0.551	0.31	6.15608e-165	Rod	jarid2a	1.14258e-19	0.515151	0.289	0.144	3.71567e-15	Rod	jarid2a
ENSDARG00000061603~~sorbs2b	1.86046e-157	0.662177	0.736	0.404	6.05023e-153	Rod	sorbs2b	6.95544e-62	0.83737	0.479	0.181	2.26191e-57	Rod	sorbs2b
ENSDARG00000062008~~hs2st1b	1.28369e-300	1.36204	0.782	0.594	4.17456e-296	Rod	hs2st1b	1.97897e-172	1.98955	0.736	0.261	6.4356e-168	Rod	hs2st1b
ENSDARG00000062101~~iffo2a	0	1.35869	0.295	0.023	0	Rod	iffo2a	2.0122e-294	1.1415	0.238	0.017	6.54366e-290	Rod	iffo2a
ENSDARG00000062178~~ripor1	1.74816e-141	0.931697	0.43	0.196	5.68501e-137	Rod	ripor1	2.0698e-22	0.567606	0.32	0.159	6.73098e-18	Rod	ripor1
ENSDARG00000062661~~abca4b	0	1.39727	0.824	0.253	0	Rod	abca4b	0	2.63974	0.768	0.071	0	Rod	abca4b
ENSDARG00000062727~~cep290	0	1.78919	0.973	0.407	0	Rod	cep290	3.91892e-151	1.45823	0.573	0.156	1.27443e-146	Rod	cep290
ENSDARG00000062799~~baiap2a	0	1.7015	0.998	0.434	0	Rod	baiap2a	0	2.12938	0.845	0.19	0	Rod	baiap2a
ENSDARG00000062902~~si:dkey-220f10.4	4.39648e-189	1.02698	0.426	0.156	1.42973e-184	Rod	si:dkey-220f10.4	4.35585e-198	1.23229	0.37	0.055	1.41652e-193	Rod	si:dkey-220f10.4
ENSDARG00000062995~~si:dkey-14o18.2	0	1.25652	0.308	0.037	0	Rod	si:dkey-14o18.2	2.59018e-126	0.571927	0.098	0.007	8.42326e-122	Rod	si:dkey-14o18.2
ENSDARG00000063101~~man2a2	1.3756e-46	0.520754	0.447	0.333	4.47346e-42	Rod	man2a2	3.26586e-50	0.751973	0.59	0.294	1.06206e-45	Rod	man2a2
ENSDARG00000063180~~dock3	0	0.691276	0.908	0.781	0	Rod	dock3	2.93468e-68	0.832781	0.705	0.321	9.54357e-64	Rod	dock3
ENSDARG00000063310~~oxr1b	7.0297e-125	0.920667	0.346	0.137	2.28606e-120	Rod	oxr1b	2.30003e-74	0.785696	0.272	0.065	7.47969e-70	Rod	oxr1b
ENSDARG00000063474~~arfgef1	6.65455e-81	0.63181	0.533	0.423	2.16406e-76	Rod	arfgef1	9.34221e-21	0.603122	0.337	0.178	3.03809e-16	Rod	arfgef1
ENSDARG00000063635~~nrxn1b	8.35726e-101	0.592382	0.107	0.015	2.71778e-96	Rod	nrxn1b	0	1.23119	0.239	0.008	0	Rod	nrxn1b
ENSDARG00000068166~~whrnb	1.22965e-94	0.754046	0.172	0.047	3.99883e-90	Rod	whrnb	1.47486e-74	0.714848	0.226	0.048	4.79624e-70	Rod	whrnb
ENSDARG00000068242~~cngb1a	6.53693e-180	0.761737	0.115	0.005	2.12581e-175	Rod	cngb1a	0	2.26802	0.508	0.026	0	Rod	cngb1a
ENSDARG00000068474~~si:dkey-94e7.2	3.54029e-85	0.532319	0.088	0.012	1.1513e-80	Rod	si:dkey-94e7.2	0	1.54305	0.318	0.009	0	Rod	si:dkey-94e7.2
ENSDARG00000068681~~crfb1	6.33576e-96	0.84876	0.352	0.18	2.06039e-91	Rod	crfb1	4.87183e-74	0.91764	0.266	0.066	1.58432e-69	Rod	crfb1
ENSDARG00000068714~~ksr1a	0	1.39028	0.537	0.164	0	Rod	ksr1a	1.15902e-163	1.35913	0.456	0.097	3.76914e-159	Rod	ksr1a
ENSDARG00000068716~~cuedc1a	8.70191e-75	0.750106	0.307	0.155	2.82986e-70	Rod	cuedc1a	1.32866e-174	1.47967	0.577	0.141	4.32081e-170	Rod	cuedc1a
ENSDARG00000069099~~tmco1	6.95487e-49	0.663321	0.238	0.126	2.26172e-44	Rod	tmco1	4.65182e-130	1.48863	0.625	0.217	1.51277e-125	Rod	tmco1
ENSDARG00000069438~~neurl1aa	2.35857e-28	0.505548	0.208	0.124	7.67008e-24	Rod	neurl1aa	4.67972e-25	0.534324	0.222	0.089	1.52184e-20	Rod	neurl1aa
ENSDARG00000069767~~nectin1a	7.29823e-177	0.989806	0.442	0.174	2.37339e-172	Rod	nectin1a	1.67527e-33	0.59745	0.324	0.134	5.44798e-29	Rod	nectin1a
ENSDARG00000070473~~parp6b	3.21257e-99	0.825224	0.333	0.15	1.04473e-94	Rod	parp6b	0	1.51257	0.395	0.039	0	Rod	parp6b
ENSDARG00000070583~~itpk1b	6.11055e-31	0.552166	0.353	0.288	1.98715e-26	Rod	itpk1b	2.2502e-58	1.0375	0.372	0.134	7.31764e-54	Rod	itpk1b
ENSDARG00000070654~~pex5	4.03393e-66	0.688097	0.348	0.197	1.31183e-61	Rod	pex5	3.49639e-62	0.82319	0.222	0.054	1.13703e-57	Rod	pex5
ENSDARG00000070666~~rhol	1.43788e-225	0.892737	0.147	0.007	4.67598e-221	Rod	rhol	0	3.49107	0.728	0.004	0	Rod	rhol
ENSDARG00000070698~~kbtbd8	8.16045e-41	0.631972	0.187	0.093	2.65378e-36	Rod	kbtbd8	6.94049e-37	0.666982	0.236	0.081	2.25705e-32	Rod	kbtbd8
ENSDARG00000070734~~dyrk4	0	2.08739	0.911	0.308	0	Rod	dyrk4	1.3076e-199	1.31097	0.326	0.044	4.25233e-195	Rod	dyrk4
ENSDARG00000071395~~camk2g1	1.034e-238	0.903159	0.798	0.698	3.36256e-234	Rod	camk2g1	3.80575e-199	2.02243	0.883	0.429	1.23763e-194	Rod	camk2g1
ENSDARG00000071458~~si:dkey-121a11.3	0	2.2643	0.841	0.115	0	Rod	si:dkey-121a11.3	0	2.27674	0.58	0.048	0	Rod	si:dkey-121a11.3
ENSDARG00000074064~~rem2	0	1.40124	0.636	0.2	0	Rod	rem2	3.60069e-73	0.796662	0.178	0.033	1.17095e-68	Rod	rem2
ENSDARG00000074244~~arhgef10lb	0	1.36864	0.883	0.373	0	Rod	arhgef10lb	7.30259e-117	1.03437	0.291	0.054	2.3748e-112	Rod	arhgef10lb
ENSDARG00000074387~~alkal1	0	1.70105	0.373	0.003	0	Rod	alkal1	0	1.96884	0.404	0.004	0	Rod	alkal1
ENSDARG00000074396~~fscn2b	0	1.69796	0.625	0.111	0	Rod	fscn2b	3.66145e-189	1.18357	0.303	0.04	1.1907e-184	Rod	fscn2b
ENSDARG00000074414~~sema4ba	3.16173e-294	1.0877	0.651	0.238	1.02819e-289	Rod	sema4ba	2.68132e-144	1.34348	0.492	0.121	8.71965e-140	Rod	sema4ba
ENSDARG00000074508~~si:dkey-28e7.3	1.63455e-97	0.721943	0.416	0.195	5.31555e-93	Rod	si:dkey-28e7.3	1.60935e-117	0.896501	0.226	0.034	5.23359e-113	Rod	si:dkey-28e7.3
ENSDARG00000074575~~ppp1r9alb	3.24745e-223	1.22266	0.367	0.11	1.05607e-218	Rod	ppp1r9alb	0	0.8675	0.144	0.005	0	Rod	ppp1r9alb
ENSDARG00000074644~~spock1	0	1.62895	0.975	0.636	0	Rod	spock1	2.5415e-126	1.24828	0.443	0.109	8.26496e-122	Rod	spock1
ENSDARG00000074760~~ttc7a	3.03984e-122	0.821726	0.234	0.067	9.88556e-118	Rod	ttc7a	0	1.48178	0.354	0.033	0	Rod	ttc7a
ENSDARG00000074892~~pde6d	3.10575e-150	0.983052	0.339	0.121	1.00999e-145	Rod	pde6d	2.16582e-245	1.58655	0.506	0.086	7.04326e-241	Rod	pde6d
ENSDARG00000075067~~aipl1	0	1.38924	0.278	0.005	0	Rod	aipl1	0	1.82118	0.374	0.001	0	Rod	aipl1
ENSDARG00000075098~~wdr17	2.07468e-151	0.948272	0.3	0.093	6.74686e-147	Rod	wdr17	0	1.43797	0.32	0.026	0	Rod	wdr17
ENSDARG00000075169~~bbs1	1.75622e-31	0.511629	0.151	0.074	5.71124e-27	Rod	bbs1	4.01836e-100	0.787214	0.18	0.026	1.30677e-95	Rod	bbs1
ENSDARG00000075230~~tet1	6.16129e-48	0.553323	0.45	0.363	2.00365e-43	Rod	tet1	4.35436e-78	1.09908	0.395	0.123	1.41604e-73	Rod	tet1
ENSDARG00000075362~~whrna	0	1.12354	0.911	0.329	0	Rod	whrna	2.92352e-65	0.751786	0.37	0.114	9.50728e-61	Rod	whrna
ENSDARG00000075456~~pik3ca	3.72505e-27	0.52614	0.205	0.126	1.21139e-22	Rod	pik3ca	9.85754e-61	0.745105	0.192	0.043	3.20567e-56	Rod	pik3ca
ENSDARG00000075564~~fam13a	1.93903e-302	1.23493	0.543	0.192	6.30571e-298	Rod	fam13a	6.52038e-30	0.541913	0.176	0.058	2.12043e-25	Rod	fam13a
ENSDARG00000075600~~si:dkeyp-41f9.3	4.57357e-260	0.894965	0.137	0.001	1.48732e-255	Rod	si:dkeyp-41f9.3	0	0.622194	0.105	0.001	0	Rod	si:dkeyp-41f9.3
ENSDARG00000075752~~myo18aa	2.56835e-92	0.669533	0.436	0.218	8.35228e-88	Rod	myo18aa	1.70685e-208	1.27163	0.381	0.056	5.55068e-204	Rod	myo18aa
ENSDARG00000075853~~sh3kbp1	2.34185e-125	0.942291	0.283	0.1	7.61569e-121	Rod	sh3kbp1	3.29388e-180	1.35572	0.303	0.043	1.07117e-175	Rod	sh3kbp1
ENSDARG00000075948~~slco4a1	1.94133e-170	1.01593	0.376	0.135	6.31321e-166	Rod	slco4a1	2.34669e-158	1.25084	0.381	0.07	7.63145e-154	Rod	slco4a1
ENSDARG00000076025~~dgkzb	3.24775e-53	0.525451	0.11	0.032	1.05617e-48	Rod	dgkzb	0	1.96817	0.485	0.046	0	Rod	dgkzb
ENSDARG00000076040~~arl15a	8.25266e-241	1.19267	0.401	0.112	2.68377e-236	Rod	arl15a	0	1.82681	0.502	0.048	0	Rod	arl15a
ENSDARG00000076055~~rpgrip1	0	1.52581	0.597	0.137	0	Rod	rpgrip1	0	2.02677	0.569	0.058	0	Rod	rpgrip1
ENSDARG00000076297~~nfatc3a	2.14678e-48	0.686039	0.333	0.228	6.98133e-44	Rod	nfatc3a	1.36163e-94	1.03249	0.236	0.045	4.42803e-90	Rod	nfatc3a
ENSDARG00000076644~~kcnv2a	0	1.38807	0.302	0.016	0	Rod	kcnv2a	0	1.59773	0.356	0.008	0	Rod	kcnv2a
ENSDARG00000076729~~myo9aa	2.69947e-233	0.656581	0.928	0.679	8.77868e-229	Rod	myo9aa	1.35805e-42	0.631127	0.416	0.174	4.41638e-38	Rod	myo9aa
ENSDARG00000076779~~fam13b	0	1.32544	0.751	0.373	0	Rod	fam13b	2.77862e-97	1.27257	0.406	0.117	9.03608e-93	Rod	fam13b
ENSDARG00000076836~~gpx4b	6.87947e-90	0.747932	0.217	0.073	2.2372e-85	Rod	gpx4b	2.29401e-65	1.02458	0.485	0.195	7.46013e-61	Rod	gpx4b
ENSDARG00000076974~~pdzd7a	0	1.1194	0.239	0.02	0	Rod	pdzd7a	0	1.2173	0.241	0.006	0	Rod	pdzd7a
ENSDARG00000076997~~stxbp4	1.10592e-62	0.708343	0.226	0.099	3.59646e-58	Rod	stxbp4	0	2.0984	0.559	0.04	0	Rod	stxbp4
ENSDARG00000077072~~si:ch73-280o22.2	2.47175e-110	0.652366	0.619	0.442	8.03814e-106	Rod	si:ch73-280o22.2	1.583e-42	0.747176	0.266	0.089	5.14793e-38	Rod	si:ch73-280o22.2
ENSDARG00000077224~~ypel2a	0	1.29215	0.649	0.231	0	Rod	ypel2a	2.00195e-23	0.531564	0.136	0.044	6.51034e-19	Rod	ypel2a
ENSDARG00000077499~~plekho1b	4.68708e-200	1.00779	0.572	0.287	1.52424e-195	Rod	plekho1b	7.70691e-76	1.15973	0.462	0.163	2.50629e-71	Rod	plekho1b
ENSDARG00000077523~~tdrd7b	5.65615e-110	0.794589	0.185	0.046	1.83938e-105	Rod	tdrd7b	8.24799e-72	0.638839	0.142	0.022	2.68225e-67	Rod	tdrd7b
ENSDARG00000077852~~samd11	0	1.92111	0.826	0.287	0	Rod	samd11	0	2.32419	0.785	0.185	0	Rod	samd11
ENSDARG00000077948~~usp54a	4.62146e-284	0.907487	0.795	0.531	1.5029e-279	Rod	usp54a	1.51129e-20	0.512054	0.37	0.199	4.91472e-16	Rod	usp54a
ENSDARG00000078102~~psda	4.19683e-58	0.708329	0.323	0.195	1.36481e-53	Rod	psda	0	1.48157	0.397	0.04	0	Rod	psda
ENSDARG00000078210~~tulp1b	0	1.84847	0.507	0.053	0	Rod	tulp1b	0	2.81504	0.801	0.052	0	Rod	tulp1b
ENSDARG00000078226~~cdh12a	1.56113e-181	0.59722	0.759	0.299	5.07679e-177	Rod	cdh12a	5.38241e-23	0.502652	0.211	0.085	1.75036e-18	Rod	cdh12a
ENSDARG00000078440~~ccdc88aa	6.8511e-216	1.00914	0.512	0.19	2.22798e-211	Rod	ccdc88aa	4.64716e-39	0.64888	0.341	0.132	1.51126e-34	Rod	ccdc88aa
ENSDARG00000078592~~nomo	1.16032e-162	1.02237	0.413	0.173	3.77337e-158	Rod	nomo	5.26855e-66	1.10904	0.427	0.16	1.71333e-61	Rod	nomo
ENSDARG00000078856~~slc22a23	7.29392e-131	0.901803	0.364	0.148	2.37198e-126	Rod	slc22a23	0	1.82054	0.456	0.019	0	Rod	slc22a23
ENSDARG00000079217~~bbs9	0	1.45746	0.787	0.3	0	Rod	bbs9	0	1.92583	0.602	0.091	0	Rod	bbs9
ENSDARG00000079374~~tjp1b	0	1.72306	0.998	0.589	0	Rod	tjp1b	2.22758e-167	1.49159	0.803	0.289	7.2441e-163	Rod	tjp1b
ENSDARG00000079397~~cerkl	0	1.78785	0.977	0.305	0	Rod	cerkl	1.43938e-193	1.46621	0.648	0.16	4.68086e-189	Rod	cerkl
ENSDARG00000079779~~radil	1.84811e-55	0.605026	0.353	0.205	6.01006e-51	Rod	radil	1.64055e-28	0.513049	0.157	0.049	5.33507e-24	Rod	radil
ENSDARG00000079939~~jmjd1cb	0	0.589443	0.991	0.954	0	Rod	jmjd1cb	2.32237e-22	0.562307	0.749	0.548	7.55234e-18	Rod	jmjd1cb
ENSDARG00000087110~~akna	5.29627e-68	0.541681	0.473	0.268	1.72235e-63	Rod	akna	6.29422e-79	0.852863	0.261	0.059	2.04688e-74	Rod	akna
ENSDARG00000087349~~reep6	3.22946e-60	0.544382	0.124	0.036	1.05022e-55	Rod	reep6	1.91209e-276	1.13672	0.305	0.029	6.21812e-272	Rod	reep6
ENSDARG00000088168~~ablim3	2.7972e-165	1.3577	0.43	0.179	9.09648e-161	Rod	ablim3	0	2.51027	0.732	0.073	0	Rod	ablim3
ENSDARG00000088377~~rp1l1b	7.95827e-32	0.629645	0.216	0.13	2.58803e-27	Rod	rp1l1b	4.17194e-175	0.760718	0.121	0.007	1.35671e-170	Rod	rp1l1b
ENSDARG00000088699~~pdzd8	6.41201e-29	0.516603	0.327	0.245	2.08519e-24	Rod	pdzd8	5.56046e-19	0.509085	0.178	0.074	1.80826e-14	Rod	pdzd8
ENSDARG00000089213~~adam15	0	2.26464	0.701	0.085	0	Rod	adam15	1.44065e-78	0.903786	0.188	0.034	4.68501e-74	Rod	adam15
ENSDARG00000089225~~ro60	7.39099e-86	0.832351	0.265	0.113	2.40355e-81	Rod	ro60	6.49172e-57	0.717298	0.172	0.038	2.11111e-52	Rod	ro60
ENSDARG00000089326~~arhgap20	0	1.48422	0.616	0.139	0	Rod	arhgap20	8.09544e-157	1.19116	0.366	0.066	2.63264e-152	Rod	arhgap20
ENSDARG00000089458~~rp1l1a	0	1.43412	0.658	0.182	0	Rod	rp1l1a	8.58539e-237	1.37931	0.416	0.059	2.79197e-232	Rod	rp1l1a
ENSDARG00000089742~~fam161a	1.72893e-135	0.864384	0.195	0.042	5.62247e-131	Rod	fam161a	6.74602e-105	0.796881	0.211	0.033	2.1938e-100	Rod	fam161a
ENSDARG00000090454~~gnb1a	3.19857e-291	1.05358	0.823	0.711	1.04017e-286	Rod	gnb1a	5.49132e-191	2.65272	0.77	0.318	1.78578e-186	Rod	gnb1a
ENSDARG00000090512~~trim8a	8.89587e-45	0.591439	0.379	0.272	2.89294e-40	Rod	trim8a	1.67878e-37	0.691435	0.255	0.09	5.4594e-33	Rod	trim8a
ENSDARG00000090793~~si:ch211-207j7.2	5.51964e-178	0.708479	0.117	0.006	1.79499e-173	Rod	si:ch211-207j7.2	0	1.45137	0.27	0.001	0	Rod	si:ch211-207j7.2
ENSDARG00000091006~~cobl	2.30546e-191	0.71295	0.785	0.579	7.49737e-187	Rod	cobl	5.0124e-43	0.734556	0.345	0.133	1.63003e-38	Rod	cobl
ENSDARG00000091834~~si:ch211-198m17.1	0	1.284	0.49	0.13	0	Rod	si:ch211-198m17.1	0	1.5688	0.385	0.022	0	Rod	si:ch211-198m17.1
ENSDARG00000093492~~CR677617.1	0	2.29979	0.701	0.246	0	Rod	CR677617.1	0	2.85091	0.672	0.025	0	Rod	CR677617.1
ENSDARG00000094677~~si:dkey-92j12.5	0	2.68057	0.716	0.022	0	Rod	si:dkey-92j12.5	2.51036e-85	0.889654	0.213	0.039	8.16368e-81	Rod	si:dkey-92j12.5
ENSDARG00000095580~~si:ch211-67e16.11	0	1.42037	0.292	0.012	0	Rod	si:ch211-67e16.11	1.81379e-70	0.69978	0.105	0.013	5.89843e-66	Rod	si:ch211-67e16.11
ENSDARG00000095603~~grid2ipb	3.52384e-296	1.23372	0.516	0.155	1.14595e-291	Rod	grid2ipb	2.21388e-181	1.13943	0.274	0.034	7.19955e-177	Rod	grid2ipb
ENSDARG00000096367~~fnbp1b	1.77345e-181	0.646774	0.776	0.607	5.76727e-177	Rod	fnbp1b	1.467e-26	0.610969	0.293	0.13	4.77069e-22	Rod	fnbp1b
ENSDARG00000097369~~FP017274.1	1.22187e-63	0.652502	0.224	0.095	3.97352e-59	Rod	FP017274.1	7.54177e-55	0.846078	0.467	0.186	2.45258e-50	Rod	FP017274.1
ENSDARG00000097645~~BX936393.1	0	1.43701	0.482	0.092	0	Rod	BX936393.1	0	0.728971	0.138	0.002	0	Rod	BX936393.1
ENSDARG00000097855~~BX323586.3	2.56215e-67	0.62535	0.131	0.036	8.33212e-63	Rod	BX323586.3	3.53254e-73	0.604725	0.136	0.02	1.14878e-68	Rod	BX323586.3
ENSDARG00000098860~~tlcd3a	6.24975e-128	0.947095	0.379	0.177	2.03242e-123	Rod	tlcd3a	3.43097e-48	0.881725	0.299	0.104	1.11575e-43	Rod	tlcd3a
ENSDARG00000099186~~slc1a5	5.78073e-104	0.812315	0.202	0.058	1.87989e-99	Rod	slc1a5	9.992e-39	0.54046	0.148	0.037	3.2494e-34	Rod	slc1a5
ENSDARG00000099217~~RDH8	1.61775e-172	1.00656	0.241	0.051	5.26091e-168	Rod	RDH8	0	0.947517	0.174	0.003	0	Rod	RDH8
ENSDARG00000099323~~dlg2	0	1.7878	0.938	0.663	0	Rod	dlg2	0	2.60465	0.787	0.141	0	Rod	dlg2
ENSDARG00000099758~~igf2bp2b	7.00223e-75	0.702055	0.367	0.199	2.27713e-70	Rod	igf2bp2b	2.4254e-265	1.75677	0.527	0.089	7.88741e-261	Rod	igf2bp2b
ENSDARG00000099768~~si:ch211-272n13.3	8.20215e-31	0.556003	0.261	0.174	2.66734e-26	Rod	si:ch211-272n13.3	5.34478e-52	0.806208	0.31	0.104	1.73812e-47	Rod	si:ch211-272n13.3
ENSDARG00000100053~~CABZ01044099.1	0	2.90388	0.913	0.05	0	Rod	CABZ01044099.1	5.17739e-36	0.56713	0.136	0.034	1.68369e-31	Rod	CABZ01044099.1
ENSDARG00000100139~~si:ch211-113d22.2	0	2.8563	0.524	0.008	0	Rod	si:ch211-113d22.2	0	5.72611	0.946	0.068	0	Rod	si:ch211-113d22.2
ENSDARG00000100313~~pip5k1cb	0	1.57423	0.548	0.149	0	Rod	pip5k1cb	1.58033e-193	1.38009	0.391	0.064	5.13923e-189	Rod	pip5k1cb
ENSDARG00000100466~~nrl	0	1.27842	0.236	0.005	0	Rod	nrl	0	1.0975	0.201	0.003	0	Rod	nrl
ENSDARG00000100847~~esrrb	8.94204e-125	0.608261	0.095	0.007	2.90795e-120	Rod	esrrb	0	1.12994	0.228	0.009	0	Rod	esrrb
ENSDARG00000101028~~fnbp1b	2.23585e-287	0.831777	0.832	0.571	7.27099e-283	Rod	fnbp1b	1.03324e-128	1.27486	0.525	0.145	3.36008e-124	Rod	fnbp1b
ENSDARG00000101984~~pde6gb	0	1.77672	0.937	0.465	0	Rod	pde6gb	0	3.27913	0.902	0.152	0	Rod	pde6gb
ENSDARG00000102125~~iqsec2a	0	1.611	0.552	0.116	0	Rod	iqsec2a	3.05151e-148	0.970448	0.216	0.027	9.92351e-144	Rod	iqsec2a
ENSDARG00000102128~~eps8a	8.18622e-133	0.792751	0.156	0.026	2.66216e-128	Rod	eps8a	2.50485e-190	0.931732	0.195	0.017	8.14576e-186	Rod	eps8a
ENSDARG00000102288~~CABZ01056321.1	1.61594e-59	0.625237	0.172	0.064	5.25502e-55	Rod	CABZ01056321.1	1.41657e-303	1.49083	0.448	0.055	4.60669e-299	Rod	CABZ01056321.1
ENSDARG00000102372~~cert1b	6.00594e-114	0.673195	0.611	0.462	1.95313e-109	Rod	cert1b	4.42933e-33	0.699335	0.347	0.153	1.44042e-28	Rod	cert1b
ENSDARG00000102506~~lrp2a	0	1.32009	0.982	0.612	0	Rod	lrp2a	0	1.84473	0.753	0.148	0	Rod	lrp2a
ENSDARG00000102645~~usp47	1.00772e-67	0.678587	0.43	0.299	3.27709e-63	Rod	usp47	2.8716e-14	0.526025	0.22	0.114	9.33845e-10	Rod	usp47
ENSDARG00000102769~~CDH18	3.91544e-130	0.647183	0.395	0.142	1.2733e-125	Rod	CDH18	2.84174e-120	1.01146	0.257	0.043	9.24133e-116	Rod	CDH18
ENSDARG00000102824~~pcdh10b	6.52792e-103	0.822227	0.408	0.219	2.12288e-98	Rod	pcdh10b	9.79998e-238	1.55198	0.58	0.114	3.18695e-233	Rod	pcdh10b
ENSDARG00000103002~~nptna	1.76474e-87	0.623045	0.523	0.282	5.73894e-83	Rod	nptna	2.14659e-36	0.610284	0.41	0.182	6.9807e-32	Rod	nptna
ENSDARG00000103038~~pik3r3a	0	1.39142	0.504	0.147	0	Rod	pik3r3a	1.15561e-33	0.572723	0.149	0.042	3.75804e-29	Rod	pik3r3a
ENSDARG00000103155~~ext1a	1.47326e-57	0.625511	0.468	0.387	4.79103e-53	Rod	ext1a	1.28477e-56	0.98076	0.489	0.213	4.17808e-52	Rod	ext1a
ENSDARG00000103271~~pla2g15	1.88041e-118	0.763966	0.165	0.034	6.1151e-114	Rod	pla2g15	4.46189e-90	0.623455	0.13	0.016	1.45101e-85	Rod	pla2g15
ENSDARG00000103476~~trpm1b	0	2.14763	0.71	0.13	0	Rod	trpm1b	2.98585e-97	0.887978	0.27	0.055	9.71e-93	Rod	trpm1b
ENSDARG00000103606~~ndst1b	0	1.56557	0.928	0.835	0	Rod	ndst1b	3.87243e-280	2.30335	0.92	0.354	1.25932e-275	Rod	ndst1b
ENSDARG00000103648~~znf536	0	1.35789	0.998	0.626	0	Rod	znf536	9.77746e-33	0.597377	0.272	0.105	3.17963e-28	Rod	znf536
ENSDARG00000103736~~gramd2aa	6.06981e-131	0.794056	0.175	0.034	1.9739e-126	Rod	gramd2aa	4.52766e-280	1.46402	0.377	0.043	1.4724e-275	Rod	gramd2aa
ENSDARG00000104139~~atp1a3b	0	2.52982	0.985	0.269	0	Rod	atp1a3b	5.45326e-200	1.25236	0.335	0.046	1.7734e-195	Rod	atp1a3b
ENSDARG00000104372~~gnb1b	0	1.15954	0.878	0.631	0	Rod	gnb1b	1.40611e-276	2.9479	0.866	0.325	4.57266e-272	Rod	gnb1b
ENSDARG00000104786~~nlgn3a	0	2.91858	0.963	0.135	0	Rod	nlgn3a	4.83023e-121	1.20156	0.328	0.065	1.57079e-116	Rod	nlgn3a
ENSDARG00000105081~~BX548246.1	2.05867e-33	0.508924	0.182	0.094	6.69481e-29	Rod	BX548246.1	1.87181e-128	1.17285	0.479	0.12	6.08712e-124	Rod	BX548246.1
ENSDARG00000105136~~ccdc50	3.12059e-283	1.00286	0.702	0.299	1.01481e-278	Rod	ccdc50	1.22134e-20	0.541673	0.238	0.107	3.9718e-16	Rod	ccdc50
ENSDARG00000105450~~si:ch211-63p21.1	1.63468e-25	0.507246	0.201	0.123	5.31598e-21	Rod	si:ch211-63p21.1	3.92461e-44	0.549299	0.14	0.031	1.27628e-39	Rod	si:ch211-63p21.1
ENSDARG00000109783~~igsf11	0	2.10443	0.997	0.688	0	Rod	igsf11	2.13438e-136	1.13581	0.521	0.131	6.94101e-132	Rod	igsf11
ENSDARG00000111326~~BX323820.1	0	1.96156	0.487	0.013	0	Rod	BX323820.1	2.96695e-248	0.977158	0.216	0.016	9.64852e-244	Rod	BX323820.1
ENSDARG00000111669~~si:ch73-267c23.10	3.06593e-182	0.716799	0.125	0.007	9.97039e-178	Rod	si:ch73-267c23.10	3.26169e-99	0.738071	0.142	0.017	1.0607e-94	Rod	si:ch73-267c23.10
ENSDARG00000113761~~DYNC2H1	1.23966e-68	0.715714	0.365	0.22	4.03137e-64	Rod	DYNC2H1	3.94605e-48	0.687553	0.285	0.093	1.28326e-43	Rod	DYNC2H1
ENSDARG00000115528~~FO082780.1	3.13995e-108	0.719803	0.141	0.027	1.02111e-103	Rod	FO082780.1	2.9177e-91	0.582944	0.119	0.013	9.48836e-87	Rod	FO082780.1
ENSDARG00000115657~~prkcaa	5.49461e-60	0.88713	0.31	0.191	1.78685e-55	Rod	prkcaa	0	1.69518	0.598	0.071	0	Rod	prkcaa
ENSDARG00000000161~~itsn2a	8.15708e-11	0.533922	0.106	0.048	2.65268e-06	BC	itsn2a	0	0.619868	0.081	0.011	0	BC	itsn2a
ENSDARG00000000189~~sema6e	1.77869e-91	1.24851	0.704	0.411	5.78429e-87	BC	sema6e	0	1.85727	0.244	0.074	0	BC	sema6e
ENSDARG00000000503~~stx1b	4.69062e-81	1.13747	0.43	0.152	1.52539e-76	BC	stx1b	2.87222e-186	0.708238	0.291	0.178	9.34045e-182	BC	stx1b
ENSDARG00000000631~~ptpn4a	5.85084e-32	0.729093	0.531	0.431	1.90269e-27	BC	ptpn4a	0	1.02544	0.366	0.194	0	BC	ptpn4a
ENSDARG00000001880~~stx3a	6.78483e-106	1.3464	0.524	0.215	2.20643e-101	BC	stx3a	0	1.65109	0.342	0.055	0	BC	stx3a
ENSDARG00000001910~~rorab	5.85533e-230	1.86978	0.726	0.248	1.90415e-225	BC	rorab	0	1.37474	0.435	0.186	0	BC	rorab
ENSDARG00000001999~~adamts18	1.02688e-21	0.749855	0.399	0.288	3.33943e-17	BC	adamts18	0	1.40519	0.324	0.109	0	BC	adamts18
ENSDARG00000002255~~epb41l3a	3.18062e-286	1.56007	0.312	0.023	1.03434e-281	BC	epb41l3a	0	1.3705	0.228	0.024	0	BC	epb41l3a
ENSDARG00000002576~~cabp5a	3.96936e-52	1.07781	0.279	0.095	1.29084e-47	BC	cabp5a	2.22554e-281	0.55803	0.053	0.005	7.23744e-277	BC	cabp5a
ENSDARG00000002607~~unm-sa1614	1.98601e-194	1.64408	0.628	0.179	6.4585e-190	BC	unm-sa1614	2.0442e-156	0.732367	0.213	0.122	6.64775e-152	BC	unm-sa1614
ENSDARG00000002635~~FAM184A	9.59188e-31	0.670943	0.118	0.031	3.11928e-26	BC	FAM184A	0	0.69454	0.097	0.015	0	BC	FAM184A
ENSDARG00000002912~~adipor1a	7.85505e-13	0.576605	0.253	0.159	2.55446e-08	BC	adipor1a	6.70743e-168	0.629087	0.271	0.17	2.18126e-163	BC	adipor1a
ENSDARG00000003008~~prkcea	1.42675e-63	1.03355	0.56	0.346	4.63978e-59	BC	prkcea	4.16187e-135	0.696482	0.263	0.178	1.35344e-130	BC	prkcea
ENSDARG00000003098~~kdm5bb	2.06081e-24	0.698598	0.399	0.262	6.70177e-20	BC	kdm5bb	9.18666e-94	0.523599	0.275	0.204	2.9875e-89	BC	kdm5bb
ENSDARG00000003290~~dab1b	2.26938e-222	1.92362	0.647	0.185	7.38001e-218	BC	dab1b	0	1.39308	0.327	0.102	0	BC	dab1b
ENSDARG00000003469~~neurod4	2.68301e-41	0.884599	0.411	0.208	8.72515e-37	BC	neurod4	0	0.800102	0.373	0.212	0	BC	neurod4
ENSDARG00000003803~~LHX3	1.4659e-172	1.40667	0.279	0.034	4.76709e-168	BC	LHX3	0	1.12819	0.178	0.042	0	BC	LHX3
ENSDARG00000004023~~isl1	0	2.01989	0.449	0.031	0	BC	isl1	0	1.47802	0.338	0.103	0	BC	isl1
ENSDARG00000004115~~mgat4b	2.73424e-29	0.988437	0.293	0.152	8.89176e-25	BC	mgat4b	0	1.44581	0.177	0.051	0	BC	mgat4b
ENSDARG00000004305~~vangl1	6.32638e-18	0.743862	0.171	0.08	2.05734e-13	BC	vangl1	6.48832e-126	0.559506	0.13	0.064	2.11e-121	BC	vangl1
ENSDARG00000004358~~gnb3a	0	2.32978	0.474	0.004	0	BC	gnb3a	0	2.8039	0.539	0.085	0	BC	gnb3a
ENSDARG00000004588~~sox4a	9.33604e-147	1.60171	0.577	0.188	3.03608e-142	BC	sox4a	5.08693e-169	0.858124	0.221	0.127	1.65427e-164	BC	sox4a
ENSDARG00000004745~~lmbr1l	4.35365e-25	0.667154	0.116	0.034	1.41581e-20	BC	lmbr1l	2.39522e-270	0.653331	0.113	0.032	7.78925e-266	BC	lmbr1l
ENSDARG00000005397~~trim3b	1.36718e-42	0.965031	0.351	0.168	4.44607e-38	BC	trim3b	7.6976e-259	0.860626	0.205	0.095	2.50326e-254	BC	trim3b
ENSDARG00000005476~~nav3	5.58866e-41	0.978212	0.315	0.137	1.81743e-36	BC	nav3	0	1.47488	0.246	0.036	0	BC	nav3
ENSDARG00000005739~~gpm6ba	2.56462e-108	0.906028	0.865	0.654	8.34015e-104	BC	gpm6ba	4.81249e-274	0.754178	0.478	0.347	1.56502e-269	BC	gpm6ba
ENSDARG00000005861~~ralgapa2	7.07728e-121	1.12162	0.805	0.584	2.30153e-116	BC	ralgapa2	4.04511e-81	0.515935	0.383	0.33	1.31547e-76	BC	ralgapa2
ENSDARG00000006065~~znf385b	0	2.60534	0.824	0.22	0	BC	znf385b	0	2.54159	0.616	0.133	0	BC	znf385b
ENSDARG00000006301~~RAPH1	1.0683e-150	1.54458	0.738	0.372	3.47413e-146	BC	RAPH1	0	0.873356	0.361	0.196	0	BC	RAPH1
ENSDARG00000006396~~nrcama	5.14963e-60	1.06269	0.322	0.114	1.67466e-55	BC	nrcama	0	0.94596	0.18	0.045	0	BC	nrcama
ENSDARG00000006747~~tmem178b	0	3.23061	0.908	0.195	0	BC	tmem178b	0	2.17551	0.676	0.193	0	BC	tmem178b
ENSDARG00000006832~~galnt9	6.03826e-15	0.598365	0.226	0.126	1.96364e-10	BC	galnt9	6.00838e-191	0.628614	0.154	0.068	1.95393e-186	BC	galnt9
ENSDARG00000007723~~efnb1	6.96055e-41	0.534926	0.793	0.576	2.26357e-36	BC	efnb1	1.55497e-92	0.550891	0.345	0.273	5.05676e-88	BC	efnb1
ENSDARG00000007807~~cyth3a	2.23151e-57	0.939148	0.51	0.263	7.25688e-53	BC	cyth3a	0	1.46379	0.257	0.034	0	BC	cyth3a
ENSDARG00000007808~~zdhhc16a	2.38508e-16	0.523671	0.089	0.029	7.75628e-12	BC	zdhhc16a	5.3531e-154	0.584231	0.136	0.063	1.74083e-149	BC	zdhhc16a
ENSDARG00000008310~~ip6k2a	1.52501e-25	0.730841	0.216	0.093	4.95935e-21	BC	ip6k2a	1.8309e-177	0.685817	0.265	0.163	5.9541e-173	BC	ip6k2a
ENSDARG00000008407~~tspan7b	1.03383e-16	0.710295	0.217	0.119	3.36202e-12	BC	tspan7b	1.69884e-116	0.550617	0.18	0.106	5.52463e-112	BC	tspan7b
ENSDARG00000009568~~ca10b	2.35647e-49	0.792364	0.164	0.038	7.66325e-45	BC	ca10b	0	0.789186	0.102	0.013	0	BC	ca10b
ENSDARG00000010408~~igsf9b	0	2.06503	0.586	0.079	0	BC	igsf9b	0	1.04029	0.314	0.146	0	BC	igsf9b
ENSDARG00000010420~~ndrg1b	5.94567e-206	1.37358	0.288	0.029	1.93353e-201	BC	ndrg1b	0	0.822966	0.308	0.154	0	BC	ndrg1b
ENSDARG00000010816~~slc7a14a	4.12395e-72	1.0702	0.214	0.047	1.34111e-67	BC	slc7a14a	0	0.926887	0.165	0.037	0	BC	slc7a14a
ENSDARG00000011088~~si:ch211-288d18.1	2.49771e-127	1.22867	0.264	0.041	8.12256e-123	BC	si:ch211-288d18.1	0	1.33778	0.216	0.029	0	BC	si:ch211-288d18.1
ENSDARG00000011170~~ndrg2	4.7671e-19	0.69524	0.384	0.272	1.55026e-14	BC	ndrg2	1.40092e-191	0.718935	0.235	0.132	4.5558e-187	BC	ndrg2
ENSDARG00000011171~~TENM2	0	3.48018	0.711	0.079	0	BC	TENM2	0	2.92721	0.492	0.1	0	BC	TENM2
ENSDARG00000011259~~trpm1a	0	1.31211	0.187	0.001	0	BC	trpm1a	0	1.3833	0.131	0.005	0	BC	trpm1a
ENSDARG00000011582~~sox5	2.30985e-143	1.90356	0.557	0.192	7.51164e-139	BC	sox5	6.42974e-169	1.29882	0.173	0.089	2.09095e-164	BC	sox5
ENSDARG00000011640~~syt5b	1.91458e-136	1.44422	0.534	0.165	6.22621e-132	BC	syt5b	0	1.83206	0.738	0.288	0	BC	syt5b
ENSDARG00000011941~~bmpr2a	5.64892e-26	0.67146	0.486	0.387	1.83703e-21	BC	bmpr2a	5.27567e-200	0.767882	0.318	0.21	1.71565e-195	BC	bmpr2a
ENSDARG00000012896~~anos1a	0	2.09032	0.32	0.009	0	BC	anos1a	0	1.16654	0.129	0.015	0	BC	anos1a
ENSDARG00000013000~~ppfia2	5.478e-48	0.961497	0.426	0.212	1.78144e-43	BC	ppfia2	0	1.54925	0.437	0.118	0	BC	ppfia2
ENSDARG00000014081~~fam184a	2.17315e-15	0.795858	0.358	0.273	7.06709e-11	BC	fam184a	4.39834e-224	0.925373	0.147	0.059	1.43034e-219	BC	fam184a
ENSDARG00000014273~~camk2d2	9.35518e-26	0.730022	0.168	0.062	3.0423e-21	BC	camk2d2	0	1.4814	0.329	0.078	0	BC	camk2d2
ENSDARG00000014522~~cdh6	3.31035e-48	0.98936	0.519	0.297	1.07653e-43	BC	cdh6	2.53617e-279	1.01022	0.225	0.104	8.24762e-275	BC	cdh6
ENSDARG00000014891~~robo2	3.2032e-199	1.8901	0.63	0.187	1.04168e-194	BC	robo2	0	1.05862	0.278	0.115	0	BC	robo2
ENSDARG00000014973~~ntng1a	1.5142e-30	0.816917	0.151	0.045	4.92418e-26	BC	ntng1a	0	1.75065	0.14	0.035	0	BC	ntng1a
ENSDARG00000015059~~daam1a	2.05055e-129	1.34914	0.901	0.65	6.66839e-125	BC	daam1a	0	1.48702	0.596	0.281	0	BC	daam1a
ENSDARG00000015174~~atp6v0a1b	6.09157e-28	0.660272	0.132	0.039	1.98098e-23	BC	atp6v0a1b	7.55792e-222	0.671592	0.156	0.065	2.45783e-217	BC	atp6v0a1b
ENSDARG00000015240~~cdkl5	4.66821e-22	0.847886	0.229	0.117	1.5181e-17	BC	cdkl5	0	1.11689	0.163	0.031	0	BC	cdkl5
ENSDARG00000015891~~ptprea	2.06041e-12	0.679612	0.252	0.168	6.70045e-08	BC	ptprea	0	1.16262	0.283	0.098	0	BC	ptprea
ENSDARG00000016263~~zdhhc5a	1.12873e-125	1.24335	0.784	0.503	3.67062e-121	BC	zdhhc5a	6.62992e-223	0.842763	0.331	0.215	2.15605e-218	BC	zdhhc5a
ENSDARG00000016551~~iqsec1b	3.08343e-29	0.536215	0.765	0.747	1.00273e-24	BC	iqsec1b	1.03224e-180	0.742192	0.395	0.282	3.35686e-176	BC	iqsec1b
ENSDARG00000017058~~large2	3.25669e-22	0.669262	0.479	0.364	1.05907e-17	BC	large2	2.23566e-108	0.769649	0.199	0.127	7.27035e-104	BC	large2
ENSDARG00000017367~~rhbdf1b	1.61342e-148	0.784934	0.108	0.004	5.24685e-144	BC	rhbdf1b	0	1.53135	0.188	0.007	0	BC	rhbdf1b
ENSDARG00000017602~~ccng2	1.79165e-25	0.772519	0.238	0.111	5.82645e-21	BC	ccng2	9.53925e-95	0.514796	0.194	0.126	3.10216e-90	BC	ccng2
ENSDARG00000017673~~nova2	0	2.73586	0.985	0.438	0	BC	nova2	0	1.61111	0.897	0.558	0	BC	nova2
ENSDARG00000018259~~atp1a3a	7.12231e-214	2.04269	0.729	0.273	2.31618e-209	BC	atp1a3a	0	1.45722	0.731	0.367	0	BC	atp1a3a
ENSDARG00000018397~~hpca	7.55215e-07	0.560337	0.277	0.231	0.0245596	BC	hpca	8.51627e-180	0.799465	0.195	0.104	2.76949e-175	BC	hpca
ENSDARG00000018508~~zdhhc8b	4.09921e-104	1.22393	0.712	0.457	1.33306e-99	BC	zdhhc8b	0	1.40302	0.39	0.19	0	BC	zdhhc8b
ENSDARG00000018787~~efna1b	1.06895e-30	0.533413	0.091	0.019	3.47624e-26	BC	efna1b	0	1.6685	0.326	0.067	0	BC	efna1b
ENSDARG00000019328~~plxna4	3.76913e-136	1.53515	0.252	0.035	1.22572e-131	BC	plxna4	0	1.95486	0.229	0.036	0	BC	plxna4
ENSDARG00000019417~~gadd45ga	4.37316e-58	1.27654	0.372	0.153	1.42215e-53	BC	gadd45ga	6.57177e-220	0.924899	0.14	0.055	2.13714e-215	BC	gadd45ga
ENSDARG00000019579~~ldb2a	3.82176e-19	0.528981	0.103	0.033	1.24284e-14	BC	ldb2a	1.79387e-238	0.9567	0.178	0.079	5.83366e-234	BC	ldb2a
ENSDARG00000019945~~ptprdb	0	1.84951	0.69	0.126	0	BC	ptprdb	0	1.79551	0.518	0.146	0	BC	ptprdb
ENSDARG00000020080~~ek1	9.36134e-102	1.21349	0.236	0.042	3.04431e-97	BC	ek1	1.59726e-224	0.803836	0.181	0.082	5.19429e-220	BC	ek1
ENSDARG00000020292~~si:ch211-254n4.3	1.29206e-55	1.03387	0.183	0.043	4.20178e-51	BC	si:ch211-254n4.3	0	1.00198	0.085	0.014	0	BC	si:ch211-254n4.3
ENSDARG00000020328~~plekha6	7.03027e-98	0.996535	0.793	0.566	2.28624e-93	BC	plekha6	0	1.16172	0.399	0.183	0	BC	plekha6
ENSDARG00000020693~~sesn1	4.48077e-119	1.0956	0.753	0.492	1.45715e-114	BC	sesn1	0	1.40064	0.4	0.18	0	BC	sesn1
ENSDARG00000020708~~mdkb	4.86305e-186	1.65571	0.724	0.281	1.58147e-181	BC	mdkb	0	1.36939	0.685	0.396	0	BC	mdkb
ENSDARG00000021442~~cdh11	9.99717e-09	0.595711	0.219	0.151	0.000325108	BC	cdh11	7.04232e-55	0.878051	0.108	0.067	2.29016e-50	BC	cdh11
ENSDARG00000021455~~strbp	1.55408e-100	1.32325	0.603	0.302	5.05388e-96	BC	strbp	0	1.29115	0.328	0.143	0	BC	strbp
ENSDARG00000021556~~ubl3b	6.63849e-181	1.74397	0.527	0.136	2.15884e-176	BC	ubl3b	0	1.24837	0.3	0.113	0	BC	ubl3b
ENSDARG00000021584~~cntn5	6.01812e-73	0.771786	0.13	0.017	1.95709e-68	BC	cntn5	4.39833e-165	0.596421	0.074	0.022	1.43034e-160	BC	cntn5
ENSDARG00000021607~~negr1	1.47568e-104	0.92248	0.849	0.57	4.7989e-100	BC	negr1	0	0.974293	0.482	0.322	0	BC	negr1
ENSDARG00000021869~~rcan2	3.56845e-164	1.59902	0.459	0.111	1.16046e-159	BC	rcan2	0	1.52372	0.223	0.016	0	BC	rcan2
ENSDARG00000022203~~gtf2ird1	1.78863e-164	1.49143	0.63	0.233	5.81662e-160	BC	gtf2ird1	0	1.15445	0.364	0.154	0	BC	gtf2ird1
ENSDARG00000022772~~OSBP2	4.64383e-52	0.935363	0.171	0.04	1.51017e-47	BC	OSBP2	0	0.943602	0.128	0.025	0	BC	OSBP2
ENSDARG00000022891~~zgc:175214	7.9539e-24	0.785654	0.269	0.141	2.58661e-19	BC	zgc:175214	8.42489e-102	0.536336	0.151	0.088	2.73977e-97	BC	zgc:175214
ENSDARG00000022895~~mcf2a	1.22031e-13	0.519166	0.096	0.037	3.96844e-09	BC	mcf2a	3.41342e-299	0.572166	0.063	0.007	1.11004e-294	BC	mcf2a
ENSDARG00000023181~~pcp4l1	3.45097e-74	0.57828	0.08	0.006	1.12226e-69	BC	pcp4l1	0	1.00949	0.175	0.03	0	BC	pcp4l1
ENSDARG00000023683~~cacna1fb	7.65196e-240	1.4476	0.298	0.026	2.48842e-235	BC	cacna1fb	0	1.71459	0.277	0.031	0	BC	cacna1fb
ENSDARG00000023771~~gabrb3	7.7122e-159	1.54027	0.455	0.102	2.50801e-154	BC	gabrb3	0	2.00435	0.349	0.061	0	BC	gabrb3
ENSDARG00000023914~~mark4a	3.08922e-19	0.688048	0.144	0.058	1.00461e-14	BC	mark4a	6.8052e-165	0.561932	0.102	0.038	2.21305e-160	BC	mark4a
ENSDARG00000024017~~mdga2a	3.12459e-26	1.05964	0.233	0.107	1.01612e-21	BC	mdga2a	3.77396e-279	0.861878	0.129	0.04	1.22729e-274	BC	mdga2a
ENSDARG00000024619~~foxo6b	1.07088e-33	1.12923	0.236	0.096	3.48251e-29	BC	foxo6b	1.1146e-32	0.732425	0.158	0.122	3.62468e-28	BC	foxo6b
ENSDARG00000024744~~dpp6b	1.31278e-14	0.557109	0.111	0.044	4.26917e-10	BC	dpp6b	1.03132e-215	0.669613	0.061	0.011	3.35385e-211	BC	dpp6b
ENSDARG00000024874~~dock4b	6.59464e-103	1.07605	0.738	0.456	2.14458e-98	BC	dock4b	0	1.1429	0.364	0.167	0	BC	dock4b
ENSDARG00000025299~~tspan9a	5.05883e-256	2.10539	0.81	0.296	1.64513e-251	BC	tspan9a	0	1.82965	0.525	0.149	0	BC	tspan9a
ENSDARG00000025513~~dip2cb	1.06963e-29	0.825073	0.265	0.123	3.47844e-25	BC	dip2cb	2.44232e-108	0.542971	0.118	0.06	7.94244e-104	BC	dip2cb
ENSDARG00000025728~~grin1b	4.28622e-98	1.59367	0.315	0.073	1.39388e-93	BC	grin1b	0	1.61818	0.351	0.049	0	BC	grin1b
ENSDARG00000025847~~sox12	4.51817e-245	1.59835	0.404	0.051	1.46931e-240	BC	sox12	7.99048e-123	0.511407	0.138	0.07	2.5985e-118	BC	sox12
ENSDARG00000025977~~blmh	3.29473e-28	0.787022	0.397	0.256	1.07145e-23	BC	blmh	0	0.903732	0.485	0.325	0	BC	blmh
ENSDARG00000026248~~slc1a7b	0	2.44578	0.505	0.003	0	BC	slc1a7b	0	2.32765	0.331	0.009	0	BC	slc1a7b
ENSDARG00000026766~~bcl2l10	1.47669e-38	0.862793	0.197	0.064	4.80221e-34	BC	bcl2l10	0	1.41739	0.304	0.117	0	BC	bcl2l10
ENSDARG00000026865~~fam107b	1.35262e-214	1.78358	0.8	0.323	4.39871e-210	BC	fam107b	0	1.19409	0.398	0.213	0	BC	fam107b
ENSDARG00000027041~~pcdh17	5.11031e-166	1.78859	0.818	0.349	1.66187e-161	BC	pcdh17	0	1.18423	0.445	0.291	0	BC	pcdh17
ENSDARG00000027079~~znf804a	2.37575e-81	0.917717	0.719	0.359	7.72593e-77	BC	znf804a	0	1.38128	0.215	0.024	0	BC	znf804a
ENSDARG00000027153~~gabrr3a	0	2.35319	0.452	0.003	0	BC	gabrr3a	0	1.54811	0.198	0.003	0	BC	gabrr3a
ENSDARG00000027236~~rs1a	6.03862e-269	2.15355	0.618	0.116	1.96376e-264	BC	rs1a	0	1.60354	0.582	0.24	0	BC	rs1a
ENSDARG00000027249~~btg1	3.42429e-182	1.24251	0.95	0.809	1.11358e-177	BC	btg1	0	0.864429	0.745	0.574	0	BC	btg1
ENSDARG00000028517~~hbp1	2.21427e-29	0.823067	0.238	0.103	7.2008e-25	BC	hbp1	3.38493e-147	0.538479	0.08	0.027	1.10078e-142	BC	hbp1
ENSDARG00000028943~~mtss1la	3.72531e-128	1.13411	0.769	0.432	1.21147e-123	BC	mtss1la	3.84867e-299	0.829532	0.369	0.228	1.25159e-294	BC	mtss1la
ENSDARG00000029372~~rasa4	3.28318e-221	1.49527	0.298	0.029	1.06769e-216	BC	rasa4	0	1.49476	0.192	0.015	0	BC	rasa4
ENSDARG00000029463~~asap1a	7.17628e-61	1.07118	0.509	0.286	2.33372e-56	BC	asap1a	1.84808e-123	0.632243	0.27	0.187	6.00994e-119	BC	asap1a
ENSDARG00000029761~~mpp6b	6.54401e-124	1.30659	0.639	0.287	2.12811e-119	BC	mpp6b	0	1.47409	0.494	0.193	0	BC	mpp6b
ENSDARG00000030116~~susd6	2.1139e-114	1.47649	0.622	0.298	6.87439e-110	BC	susd6	5.57988e-245	1.13782	0.26	0.146	1.81458e-240	BC	susd6
ENSDARG00000030750~~gabrr3b	9.84449e-131	1.36395	0.416	0.101	3.20143e-126	BC	gabrr3b	0	1.36692	0.185	0.006	0	BC	gabrr3b
ENSDARG00000031049~~igsf21a	0	3.17037	0.894	0.339	0	BC	igsf21a	0	3.78565	0.822	0.084	0	BC	igsf21a
ENSDARG00000031283~~vamp1	4.60373e-114	1.24933	0.288	0.055	1.49713e-109	BC	vamp1	0	1.96933	0.33	0.035	0	BC	vamp1
ENSDARG00000032990~~plxnb3	1.08254e-21	0.512292	0.584	0.482	3.52042e-17	BC	plxnb3	0	1.25666	0.307	0.095	0	BC	plxnb3
ENSDARG00000033327~~unc5b	3.82664e-74	0.988012	0.748	0.534	1.24442e-69	BC	unc5b	2.09701e-185	0.706596	0.215	0.115	6.81948e-181	BC	unc5b
ENSDARG00000033444~~map4k6	1.54188e-257	1.78617	0.517	0.087	5.01418e-253	BC	map4k6	0	1.37795	0.231	0.039	0	BC	map4k6
ENSDARG00000033447~~nxph1	1.51032e-145	0.834859	0.082	0.001	4.91155e-141	BC	nxph1	1.29309e-150	0.908207	0.062	0.017	4.20513e-146	BC	nxph1
ENSDARG00000033614~~rasgef1ba	9.08473e-55	1.00236	0.493	0.269	2.95435e-50	BC	rasgef1ba	1.86898e-110	0.785452	0.156	0.09	6.07794e-106	BC	rasgef1ba
ENSDARG00000034105~~mtus1b	1.01746e-43	0.879221	0.176	0.048	3.30879e-39	BC	mtus1b	0	1.10348	0.167	0.033	0	BC	mtus1b
ENSDARG00000034229~~kcnip3a	1.6267e-192	1.72185	0.245	0.022	5.29004e-188	BC	kcnip3a	6.6365e-204	0.952621	0.101	0.032	2.15819e-199	BC	kcnip3a
ENSDARG00000034420~~irx6a	5.27272e-16	0.55838	0.082	0.026	1.71469e-11	BC	irx6a	2.41976e-181	0.700692	0.063	0.015	7.86906e-177	BC	irx6a
ENSDARG00000034668~~celf3a	1.213e-151	1.38119	0.678	0.275	3.94467e-147	BC	celf3a	0	0.935132	0.512	0.318	0	BC	celf3a
ENSDARG00000035519~~histh1l	1.93832e-16	0.687595	0.231	0.129	6.30343e-12	BC	histh1l	4.89661e-224	0.635201	0.54	0.445	1.59238e-219	BC	histh1l
ENSDARG00000035650~~evla	6.83719e-46	0.955185	0.389	0.188	2.22345e-41	BC	evla	0	0.947247	0.274	0.123	0	BC	evla
ENSDARG00000035765~~CU633984.1	5.79993e-83	0.635441	0.091	0.006	1.88614e-78	BC	CU633984.1	0	0.779026	0.11	0.021	0	BC	CU633984.1
ENSDARG00000036058~~gnao1b	7.19127e-49	0.836782	0.146	0.031	2.3386e-44	BC	gnao1b	0	2.11803	0.328	0.058	0	BC	gnao1b
ENSDARG00000036295~~golga7ba	1.68725e-61	1.03131	0.341	0.123	5.48693e-57	BC	golga7ba	2.06318e-279	0.866675	0.255	0.129	6.70945e-275	BC	golga7ba
ENSDARG00000036344~~calb2b	1.87269e-132	1.13719	0.193	0.02	6.08998e-128	BC	calb2b	0	1.96391	0.413	0.075	0	BC	calb2b
ENSDARG00000037324~~klhl17	7.54914e-33	0.803795	0.171	0.055	2.45498e-28	BC	klhl17	2.67825e-198	0.538467	0.09	0.027	8.70966e-194	BC	klhl17
ENSDARG00000037373~~ephb2a	3.21885e-214	1.40239	0.92	0.577	1.04677e-209	BC	ephb2a	0	0.905014	0.511	0.344	0	BC	ephb2a
ENSDARG00000037545~~mtnr1aa	1.19992e-08	0.521767	0.142	0.082	0.000390213	BC	mtnr1aa	1.80837e-307	0.787064	0.099	0.022	5.88084e-303	BC	mtnr1aa
ENSDARG00000037588~~bhlhe23	0	1.37739	0.228	0.002	0	BC	bhlhe23	0	1.42256	0.264	0.052	0	BC	bhlhe23
ENSDARG00000037607~~nol4lb	2.48644e-82	1.13547	0.514	0.204	8.08591e-78	BC	nol4lb	0	1.23008	0.402	0.19	0	BC	nol4lb
ENSDARG00000037921~~gng13b	7.65532e-301	1.85834	0.408	0.042	2.48951e-296	BC	gng13b	0	2.06864	0.463	0.122	0	BC	gng13b
ENSDARG00000038059~~grb2b	1.49022e-48	0.887389	0.551	0.381	4.84618e-44	BC	grb2b	0	1.16246	0.307	0.152	0	BC	grb2b
ENSDARG00000038446~~nrp2b	3.41664e-191	1.56448	0.937	0.716	1.11109e-186	BC	nrp2b	0	0.699462	0.343	0.161	0	BC	nrp2b
ENSDARG00000038814~~myrip	7.45087e-59	1.19467	0.224	0.059	2.42302e-54	BC	myrip	6.39709e-91	0.556628	0.11	0.057	2.08034e-86	BC	myrip
ENSDARG00000039034~~marcksl1a	7.88023e-103	1.11062	0.688	0.389	2.56265e-98	BC	marcksl1a	0	0.873858	0.493	0.354	0	BC	marcksl1a
ENSDARG00000039458~~lhx4	6.51517e-184	1.59208	0.673	0.222	2.11873e-179	BC	lhx4	0	1.30058	0.223	0.062	0	BC	lhx4
ENSDARG00000039517~~c8b	1.42837e-226	1.86545	0.517	0.104	4.64507e-222	BC	c8b	0	0.881065	0.13	0.023	0	BC	c8b
ENSDARG00000040048~~GALNTL6	2.63419e-14	0.57244	0.207	0.107	8.56638e-10	BC	GALNTL6	0	2.00836	0.241	0.053	0	BC	GALNTL6
ENSDARG00000040380~~arhgef1a	3.29498e-111	1.37071	0.385	0.104	1.07153e-106	BC	arhgef1a	0	1.02399	0.224	0.071	0	BC	arhgef1a
ENSDARG00000040452~~fam214a	1.94093e-53	0.745503	0.654	0.514	6.31189e-49	BC	fam214a	4.7903e-91	0.600184	0.227	0.158	1.55781e-86	BC	fam214a
ENSDARG00000040627~~grik1b	2.66753e-260	1.01659	0.135	0.001	8.67481e-256	BC	grik1b	0	1.63438	0.181	0.005	0	BC	grik1b
ENSDARG00000040884~~mxi1	7.44521e-35	0.873059	0.399	0.229	2.42118e-30	BC	mxi1	3.46124e-141	0.577032	0.286	0.192	1.1256e-136	BC	mxi1
ENSDARG00000040991~~cttnbp2	3.47916e-23	0.830108	0.202	0.091	1.13142e-18	BC	cttnbp2	0	1.12642	0.259	0.087	0	BC	cttnbp2
ENSDARG00000042646~~zgc:77784	0	2.5357	0.786	0.125	0	BC	zgc:77784	0	3.04609	0.571	0.052	0	BC	zgc:77784
ENSDARG00000042840~~eml1	1.24222e-95	1.19503	0.76	0.596	4.0397e-91	BC	eml1	0	1.14632	0.449	0.187	0	BC	eml1
ENSDARG00000042872~~zdhhc8a	2.11535e-133	0.685374	0.096	0.003	6.87912e-129	BC	zdhhc8a	0	0.604703	0.079	0.002	0	BC	zdhhc8a
ENSDARG00000042962~~dgcr2	1.95535e-47	0.756328	0.613	0.452	6.3588e-43	BC	dgcr2	5.5299e-134	0.604384	0.367	0.285	1.79832e-129	BC	dgcr2
ENSDARG00000043257~~ckbb	1.74842e-08	0.516477	0.408	0.358	0.000568586	BC	ckbb	1.03557e-265	0.627649	0.506	0.365	3.36769e-261	BC	ckbb
ENSDARG00000043474~~atp2b3a	9.91951e-26	0.684208	0.12	0.035	3.22582e-21	BC	atp2b3a	2.60884e-227	0.651906	0.155	0.062	8.48396e-223	BC	atp2b3a
ENSDARG00000043661~~cadpsa	2.82955e-51	1.17406	0.233	0.068	9.2017e-47	BC	cadpsa	0	1.7341	0.312	0.092	0	BC	cadpsa
ENSDARG00000043907~~fgf11b	3.24308e-128	0.641517	0.092	0.003	1.05465e-123	BC	fgf11b	0	1.11069	0.107	0.003	0	BC	fgf11b
ENSDARG00000044062~~ctbp2a	5.59329e-167	1.35166	0.834	0.454	1.81894e-162	BC	ctbp2a	0	1.62011	0.566	0.212	0	BC	ctbp2a
ENSDARG00000044436~~rps6ka4	6.28885e-08	0.500206	0.118	0.066	0.00204513	BC	rps6ka4	1.64681e-132	0.534801	0.102	0.043	5.35542e-128	BC	rps6ka4
ENSDARG00000044815~~serinc4	5.5314e-63	1.10983	0.296	0.095	1.79881e-58	BC	serinc4	1.71212e-260	0.726036	0.245	0.119	5.56782e-256	BC	serinc4
ENSDARG00000045289~~gpr137c	4.72231e-36	0.943603	0.377	0.214	1.53569e-31	BC	gpr137c	0	1.04308	0.199	0.053	0	BC	gpr137c
ENSDARG00000045685~~cntn1b	0	1.62238	0.325	0.018	0	BC	cntn1b	0	2.02995	0.322	0.014	0	BC	cntn1b
ENSDARG00000045694~~prickle1b	5.49452e-37	0.72593	0.115	0.025	1.78682e-32	BC	prickle1b	3.84967e-86	0.55858	0.223	0.152	1.25191e-81	BC	prickle1b
ENSDARG00000046010~~kdm2bb	2.88662e-67	1.12662	0.428	0.184	9.38728e-63	BC	kdm2bb	1.0998e-180	0.747423	0.25	0.151	3.57655e-176	BC	kdm2bb
ENSDARG00000046107~~caskin1	7.96944e-50	1.05944	0.406	0.208	2.59166e-45	BC	caskin1	0	1.14008	0.358	0.166	0	BC	caskin1
ENSDARG00000046150~~b4galnt4a	1.70294e-15	0.732456	0.474	0.446	5.53796e-11	BC	b4galnt4a	1.22491e-59	0.715608	0.273	0.223	3.98339e-55	BC	b4galnt4a
ENSDARG00000051748~~ccnd2a	9.62987e-52	1.1602	0.502	0.278	3.13163e-47	BC	ccnd2a	1.03669e-68	1.07742	0.137	0.088	3.37132e-64	BC	ccnd2a
ENSDARG00000051814~~ptprz1a	3.79891e-52	1.02476	0.514	0.275	1.2354e-47	BC	ptprz1a	0	1.24161	0.303	0.1	0	BC	ptprz1a
ENSDARG00000051824~~tmeff2a	4.95258e-23	0.626077	0.11	0.033	1.61058e-18	BC	tmeff2a	6.1781e-273	0.899574	0.1	0.025	2.00912e-268	BC	tmeff2a
ENSDARG00000051939~~pcxb	6.06729e-29	0.592288	0.077	0.015	1.97308e-24	BC	pcxb	2.6489e-193	0.689325	0.06	0.012	8.61421e-189	BC	pcxb
ENSDARG00000052016~~cabp2a	9.05887e-61	0.566567	0.08	0.007	2.94594e-56	BC	cabp2a	0	1.01651	0.123	0.008	0	BC	cabp2a
ENSDARG00000052644~~ca10a	4.06393e-52	1.06054	0.226	0.06	1.32159e-47	BC	ca10a	0	1.67643	0.176	0.036	0	BC	ca10a
ENSDARG00000052648~~hs3st4	2.12549e-17	1.78646	0.183	0.089	6.91211e-13	BC	hs3st4	2.30811e-306	1.9141	0.121	0.033	7.50597e-302	BC	hs3st4
ENSDARG00000052893~~rx3	1.02979e-112	0.74657	0.096	0.004	3.34889e-108	BC	rx3	1.61497e-232	0.637743	0.064	0.012	5.25187e-228	BC	rx3
ENSDARG00000052982~~gabrr2a	1.50024e-106	0.562015	0.08	0.003	4.87879e-102	BC	gabrr2a	0	1.75448	0.194	0.011	0	BC	gabrr2a
ENSDARG00000053122~~clvs2	7.17596e-31	0.797908	0.17	0.056	2.33362e-26	BC	clvs2	1.72949e-133	0.553433	0.136	0.067	5.62431e-129	BC	clvs2
ENSDARG00000053547~~jakmip2	8.38693e-178	1.38173	0.303	0.039	2.72743e-173	BC	jakmip2	8.44893e-281	0.736167	0.161	0.059	2.74759e-276	BC	jakmip2
ENSDARG00000053713~~ccdc88c	1.09476e-123	1.24907	0.743	0.469	3.56017e-119	BC	ccdc88c	0	0.973622	0.404	0.249	0	BC	ccdc88c
ENSDARG00000054378~~pcbp3	0	2.57037	0.834	0.112	0	BC	pcbp3	0	2.04256	0.774	0.239	0	BC	pcbp3
ENSDARG00000054543~~samsn1a	0	2.48842	0.685	0.07	0	BC	samsn1a	0	1.85698	0.508	0.088	0	BC	samsn1a
ENSDARG00000054683~~prdm8b	8.3005e-158	1.06445	0.173	0.012	2.69932e-153	BC	prdm8b	0	0.986487	0.186	0.045	0	BC	prdm8b
ENSDARG00000055158~~prox1a	4.3626e-194	1.84078	0.89	0.483	1.41872e-189	BC	prox1a	0	1.11177	0.439	0.181	0	BC	prox1a
ENSDARG00000055302~~grid2	3.63415e-14	0.837452	0.341	0.238	1.18182e-09	BC	grid2	0	2.13235	0.29	0.065	0	BC	grid2
ENSDARG00000055543~~appb	7.68132e-16	0.657918	0.37	0.287	2.49797e-11	BC	appb	2.6695e-274	0.846484	0.353	0.222	8.68121e-270	BC	appb
ENSDARG00000055574~~FOXN2	7.33357e-271	1.87522	0.8	0.26	2.38488e-266	BC	FOXN2	0	0.675587	0.371	0.199	0	BC	FOXN2
ENSDARG00000055792~~foxo4	1.51418e-115	1.27852	0.498	0.162	4.92413e-111	BC	foxo4	0	1.14455	0.3	0.118	0	BC	foxo4
ENSDARG00000056001~~fryb	6.62098e-23	0.743939	0.389	0.265	2.15314e-18	BC	fryb	8.77335e-74	0.509942	0.2	0.14	2.85309e-69	BC	fryb
ENSDARG00000056036~~stxbp1b	1.3303e-70	0.902638	0.62	0.312	4.32612e-66	BC	stxbp1b	0	1.16629	0.401	0.142	0	BC	stxbp1b
ENSDARG00000056084~~igsf21b	0	1.54597	0.305	0.004	0	BC	igsf21b	0	2.0343	0.304	0.008	0	BC	igsf21b
ENSDARG00000056175~~scrt2	3.43003e-194	1.54634	0.42	0.073	1.11545e-189	BC	scrt2	1.30128e-268	0.74379	0.289	0.156	4.23178e-264	BC	scrt2
ENSDARG00000056292~~vsx1	0	3.286	0.745	0.027	0	BC	vsx1	0	2.23617	0.739	0.248	0	BC	vsx1
ENSDARG00000056483~~ssbp4	8.13357e-106	0.937808	0.844	0.572	2.64504e-101	BC	ssbp4	2.71638e-146	0.50457	0.52	0.445	8.83368e-142	BC	ssbp4
ENSDARG00000056490~~SSBP4	4.25841e-199	1.37399	0.897	0.583	1.38484e-194	BC	SSBP4	0	0.903375	0.695	0.502	0	BC	SSBP4
ENSDARG00000056623~~ptenb	1.03192e-152	1.34042	0.776	0.438	3.35581e-148	BC	ptenb	0	1.01485	0.521	0.332	0	BC	ptenb
ENSDARG00000057000~~camkvl	0	1.46582	0.284	0.011	0	BC	camkvl	0	1.53563	0.194	0.007	0	BC	camkvl
ENSDARG00000057016~~cdc14ab	1.11819e-105	1.22487	0.724	0.43	3.63635e-101	BC	cdc14ab	0	2.01434	0.448	0.123	0	BC	cdc14ab
ENSDARG00000057141~~zgc:110045	1.1437e-87	0.836867	0.793	0.664	3.7193e-83	BC	zgc:110045	7.4747e-127	0.571612	0.399	0.313	2.43077e-122	BC	zgc:110045
ENSDARG00000057481~~RNF157	2.78525e-29	0.752172	0.366	0.204	9.05763e-25	BC	RNF157	0	0.846077	0.266	0.122	0	BC	RNF157
ENSDARG00000057729~~ephb6	3.0526e-87	0.792678	0.92	0.6	9.92706e-83	BC	ephb6	4.96438e-156	0.571652	0.475	0.383	1.61442e-151	BC	ephb6
ENSDARG00000058232~~fbrsl1	0	2.55155	0.82	0.205	0	BC	fbrsl1	0	1.63295	0.533	0.232	0	BC	fbrsl1
ENSDARG00000058243~~phactr3a	3.79856e-87	1.14114	0.243	0.051	1.23529e-82	BC	phactr3a	1.34243e-302	0.854466	0.166	0.06	4.36557e-298	BC	phactr3a
ENSDARG00000058256~~draxin	4.81477e-237	1.83861	0.445	0.068	1.56576e-232	BC	draxin	0	1.00021	0.221	0.088	0	BC	draxin
ENSDARG00000058603~~jph1a	2.97869e-107	0.96598	0.166	0.019	9.68671e-103	BC	jph1a	4.91235e-296	0.640019	0.094	0.02	1.5975e-291	BC	jph1a
ENSDARG00000058692~~fzd3b	3.8577e-11	0.642947	0.164	0.093	1.25452e-06	BC	fzd3b	0	0.921866	0.174	0.054	0	BC	fzd3b
ENSDARG00000058853~~sash1b	8.69886e-232	1.19037	0.209	0.011	2.82887e-227	BC	sash1b	0	0.806143	0.123	0.021	0	BC	sash1b
ENSDARG00000058969~~cntnap2a	0	3.41547	0.755	0.145	0	BC	cntnap2a	0	3.43357	0.586	0.07	0	BC	cntnap2a
ENSDARG00000059473~~kank4	3.98921e-95	1.24295	0.485	0.168	1.29729e-90	BC	kank4	0	1.35662	0.315	0.092	0	BC	kank4
ENSDARG00000059475~~camsap3	8.83313e-128	1.33279	0.685	0.37	2.87253e-123	BC	camsap3	0	1.11136	0.231	0.066	0	BC	camsap3
ENSDARG00000059738~~ptprsa	4.37989e-147	1.56929	0.812	0.521	1.42434e-142	BC	ptprsa	1.62533e-47	0.577673	0.38	0.357	5.28558e-43	BC	ptprsa
ENSDARG00000059832~~adgrb3	2.18477e-10	0.555238	0.209	0.131	7.10486e-06	BC	adgrb3	0	1.0091	0.166	0.053	0	BC	adgrb3
ENSDARG00000059939~~dab1a	9.9218e-22	0.561382	0.64	0.543	3.22657e-17	BC	dab1a	0	1.20355	0.266	0.085	0	BC	dab1a
ENSDARG00000059978~~cplx4a	1.39695e-10	0.611996	0.243	0.162	4.54289e-06	BC	cplx4a	2.10953e-306	0.750562	0.139	0.042	6.86019e-302	BC	cplx4a
ENSDARG00000060112~~sybu	1.15303e-27	0.59727	0.108	0.028	3.74965e-23	BC	sybu	0	0.552283	0.067	0.008	0	BC	sybu
ENSDARG00000060482~~mid1	3.58379e-86	0.866391	0.743	0.551	1.16545e-81	BC	mid1	5.29007e-132	0.616652	0.197	0.115	1.72033e-127	BC	mid1
ENSDARG00000060597~~zgc:158659	1.62698e-68	0.97656	0.197	0.041	5.29093e-64	BC	zgc:158659	3.2531e-212	0.559863	0.099	0.031	1.05791e-207	BC	zgc:158659
ENSDARG00000060610~~pcdh7b	9.99892e-65	1.48034	0.495	0.223	3.25165e-60	BC	pcdh7b	1.74193e-164	1.09179	0.26	0.159	5.66475e-160	BC	pcdh7b
ENSDARG00000060638~~CLSTN2	1.67593e-161	1.25801	0.211	0.019	5.45014e-157	BC	CLSTN2	0	2.43066	0.305	0.014	0	BC	CLSTN2
ENSDARG00000060711~~sv2bb	2.43101e-278	1.88155	0.534	0.088	7.90564e-274	BC	sv2bb	0	2.20057	0.473	0.066	0	BC	sv2bb
ENSDARG00000061335~~galnt1	2.09391e-111	1.22845	0.771	0.575	6.80938e-107	BC	galnt1	3.80321e-205	0.856759	0.347	0.24	1.2368e-200	BC	galnt1
ENSDARG00000061421~~BRSK2	2.82463e-45	0.837433	0.704	0.581	9.18568e-41	BC	BRSK2	1.2231e-193	0.751214	0.271	0.158	3.97751e-189	BC	BRSK2
ENSDARG00000061459~~si:dkey-253i9.4	4.22575e-173	1.49873	0.726	0.315	1.37421e-168	BC	si:dkey-253i9.4	0	1.13256	0.32	0.142	0	BC	si:dkey-253i9.4
ENSDARG00000061479~~thsd7aa	1.78776e-178	1.73071	0.527	0.136	5.81379e-174	BC	thsd7aa	4.60159e-87	0.512689	0.373	0.307	1.49644e-82	BC	thsd7aa
ENSDARG00000061640~~sipa1l2	1.14399e-202	1.61695	0.854	0.487	3.72027e-198	BC	sipa1l2	0	1.15647	0.419	0.239	0	BC	sipa1l2
ENSDARG00000061736~~ank3a	1.35683e-176	1.56568	0.608	0.176	4.4124e-172	BC	ank3a	0	0.988847	0.273	0.124	0	BC	ank3a
ENSDARG00000061752~~ripor2	1.09834e-137	1.76659	0.649	0.304	3.57181e-133	BC	ripor2	0	1.27856	0.241	0.085	0	BC	ripor2
ENSDARG00000061810~~mbd3b	8.97384e-55	1.00428	0.329	0.127	2.91829e-50	BC	mbd3b	4.26512e-120	0.652849	0.239	0.159	1.38702e-115	BC	mbd3b
ENSDARG00000061909~~si:ch73-233f7.1	1.17672e-156	0.977527	0.132	0.006	3.8267e-152	BC	si:ch73-233f7.1	2.95956e-194	0.738698	0.129	0.05	9.62448e-190	BC	si:ch73-233f7.1
ENSDARG00000062277~~ppp2r2cb	2.84296e-127	0.685868	0.099	0.004	9.24532e-123	BC	ppp2r2cb	0	0.721616	0.091	0.008	0	BC	ppp2r2cb
ENSDARG00000062338~~zeb2a	1.01188e-137	0.967961	0.918	0.767	3.29065e-133	BC	zeb2a	2.87391e-190	0.770548	0.502	0.411	9.34596e-186	BC	zeb2a
ENSDARG00000062477~~kiaa1549la	3.32306e-20	0.722997	0.25	0.125	1.08066e-15	BC	kiaa1549la	1.41428e-149	0.858166	0.085	0.03	4.59922e-145	BC	kiaa1549la
ENSDARG00000062667~~mpp3b	1.27696e-167	0.995063	0.164	0.01	4.15267e-163	BC	mpp3b	0	0.609025	0.078	0.012	0	BC	mpp3b
ENSDARG00000062693~~nrxn3b	0	3.8018	0.801	0.063	0	BC	nrxn3b	0	3.64446	0.683	0.095	0	BC	nrxn3b
ENSDARG00000062721~~dennd4a	1.00163e-08	0.552712	0.253	0.187	0.000325729	BC	dennd4a	0	1.00664	0.227	0.073	0	BC	dennd4a
ENSDARG00000062790~~CU639469.1	2.54169e-94	1.07948	0.705	0.387	8.26558e-90	BC	CU639469.1	2.78927e-142	0.626922	0.34	0.246	9.07071e-138	BC	CU639469.1
ENSDARG00000062797~~nell2b	4.53537e-151	1.08166	0.161	0.011	1.4749e-146	BC	nell2b	0	1.45037	0.184	0.03	0	BC	nell2b
ENSDARG00000062880~~cntn3a.1	9.61277e-38	0.642987	0.106	0.021	3.12607e-33	BC	cntn3a.1	2.78654e-239	1.17165	0.113	0.035	9.06181e-235	BC	cntn3a.1
ENSDARG00000063032~~dok6	0	2.62749	0.623	0.076	0	BC	dok6	0	1.89776	0.236	0.013	0	BC	dok6
ENSDARG00000063133~~slc4a10a	1.99496e-200	1.53401	0.418	0.068	6.48762e-196	BC	slc4a10a	0	1.16365	0.208	0.086	0	BC	slc4a10a
ENSDARG00000063149~~tmtc1	2.48684e-66	1.04766	0.248	0.065	8.08721e-62	BC	tmtc1	1.83169e-193	0.527649	0.072	0.018	5.95666e-189	BC	tmtc1
ENSDARG00000063180~~dock3	2.44388e-209	1.43606	0.945	0.796	7.94751e-205	BC	dock3	0	1.39682	0.59	0.246	0	BC	dock3
ENSDARG00000063309~~tjp2a	5.64441e-136	1.30431	0.368	0.074	1.83556e-131	BC	tjp2a	9.26065e-160	0.634494	0.154	0.074	3.01156e-155	BC	tjp2a
ENSDARG00000063538~~kalrnb	1.12337e-126	1.43935	0.372	0.087	3.6532e-122	BC	kalrnb	0	1.22267	0.25	0.078	0	BC	kalrnb
ENSDARG00000063614~~skor2	4.81576e-239	0.942005	0.128	0.002	1.56609e-234	BC	skor2	0	1.29215	0.118	0.009	0	BC	skor2
ENSDARG00000063711~~trim3a	2.13786e-41	0.889776	0.416	0.223	6.95232e-37	BC	trim3a	1.10668e-193	0.733099	0.15	0.066	3.59892e-189	BC	trim3a
ENSDARG00000068323~~astn1	9.7776e-127	1.38507	0.562	0.196	3.17968e-122	BC	astn1	0	1.53692	0.262	0.074	0	BC	astn1
ENSDARG00000068370~~ralgps1	1.75551e-34	0.832654	0.397	0.223	5.70893e-30	BC	ralgps1	1.56588e-146	0.647482	0.179	0.096	5.09223e-142	BC	ralgps1
ENSDARG00000068480~~map7d2a	1.48716e-148	1.45251	0.445	0.108	4.83623e-144	BC	map7d2a	3.62906e-94	0.571127	0.144	0.083	1.18017e-89	BC	map7d2a
ENSDARG00000068701~~gpr85	4.47908e-10	0.621707	0.202	0.13	1.4566e-05	BC	gpr85	2.97076e-269	0.719176	0.137	0.046	9.66092e-265	BC	gpr85
ENSDARG00000068745~~map4l	1.06045e-34	0.773877	0.471	0.298	3.44857e-30	BC	map4l	0	1.13323	0.252	0.081	0	BC	map4l
ENSDARG00000068989~~gabra1	1.31067e-56	0.939055	0.233	0.064	4.26231e-52	BC	gabra1	0	1.15162	0.271	0.081	0	BC	gabra1
ENSDARG00000069139~~grik1a	0	1.83288	0.32	0.01	0	BC	grik1a	0	1.70947	0.168	0.01	0	BC	grik1a
ENSDARG00000069767~~nectin1a	6.64393e-77	1.05684	0.49	0.207	2.1606e-72	BC	nectin1a	7.84321e-138	0.692384	0.201	0.116	2.55061e-133	BC	nectin1a
ENSDARG00000069981~~cspg5a	5.99075e-88	1.0336	0.812	0.531	1.94819e-83	BC	cspg5a	0	1.32161	0.729	0.42	0	BC	cspg5a
ENSDARG00000070080~~nbeaa	1.92139e-151	1.157	0.868	0.553	6.24835e-147	BC	nbeaa	0	0.693289	0.599	0.435	0	BC	nbeaa
ENSDARG00000070227~~nhsa	1.5731e-40	0.794589	0.159	0.042	5.11572e-36	BC	nhsa	5.84328e-170	0.514238	0.088	0.029	1.90023e-165	BC	nhsa
ENSDARG00000070467~~lactbl1b	4.37904e-305	1.37299	0.252	0.011	1.42406e-300	BC	lactbl1b	0	1.23964	0.17	0.01	0	BC	lactbl1b
ENSDARG00000070787~~jupa	4.1941e-153	1.51743	0.526	0.157	1.36392e-148	BC	jupa	0	1.23892	0.269	0.084	0	BC	jupa
ENSDARG00000071709~~ppp1r9bb	3.51933e-240	1.62848	0.392	0.05	1.14449e-235	BC	ppp1r9bb	0	1.16523	0.214	0.045	0	BC	ppp1r9bb
ENSDARG00000071823~~adarb2	0	3.12093	0.557	0.076	0	BC	adarb2	0	1.27436	0.159	0.046	0	BC	adarb2
ENSDARG00000073843~~myo9ab	2.88051e-29	0.730342	0.187	0.067	9.36741e-25	BC	myo9ab	1.70547e-248	0.666564	0.122	0.039	5.54619e-244	BC	myo9ab
ENSDARG00000073883~~clstn3	0	2.3018	0.515	0.062	0	BC	clstn3	0	1.80259	0.341	0.06	0	BC	clstn3
ENSDARG00000074255~~micu3b	3.82073e-18	0.651726	0.164	0.072	1.2425e-13	BC	micu3b	2.44255e-199	0.635225	0.142	0.059	7.94317e-195	BC	micu3b
ENSDARG00000074275~~limch1a	5.26127e-141	1.49974	0.574	0.211	1.71097e-136	BC	limch1a	0	1.53825	0.324	0.092	0	BC	limch1a
ENSDARG00000074320~~KCNAB3	2.79262e-64	0.5569	0.087	0.008	9.08161e-60	BC	KCNAB3	0	1.10842	0.145	0.015	0	BC	KCNAB3
ENSDARG00000074328~~apba1b	5.44598e-17	0.62601	0.291	0.175	1.77103e-12	BC	apba1b	0	0.867114	0.289	0.14	0	BC	apba1b
ENSDARG00000074381~~farp1	7.07494e-16	0.642507	0.413	0.347	2.30077e-11	BC	farp1	0	0.952308	0.284	0.135	0	BC	farp1
ENSDARG00000074419~~hcn4l	3.68103e-60	0.561697	0.084	0.008	1.19707e-55	BC	hcn4l	2.0396e-297	0.563125	0.064	0.008	6.63279e-293	BC	hcn4l
ENSDARG00000074524~~cntnap1	0	1.41817	0.253	0.011	0	BC	cntnap1	0	1.23549	0.169	0.003	0	BC	cntnap1
ENSDARG00000074680~~rims1a	3.46875e-22	0.688217	0.259	0.132	1.12804e-17	BC	rims1a	4.49601e-166	0.764376	0.173	0.088	1.4621e-161	BC	rims1a
ENSDARG00000074697~~npdc1a	7.43533e-84	1.15132	0.346	0.103	2.41797e-79	BC	npdc1a	0	1.01547	0.169	0.034	0	BC	npdc1a
ENSDARG00000074761~~bicdl1	3.86801e-32	0.814423	0.426	0.261	1.25788e-27	BC	bicdl1	0	1.14512	0.276	0.11	0	BC	bicdl1
ENSDARG00000074812~~fhdc1	0	1.51897	0.286	0.016	0	BC	fhdc1	0	0.542157	0.067	0.007	0	BC	fhdc1
ENSDARG00000074902~~nol4la	1.56322e-46	0.993155	0.219	0.068	5.08358e-42	BC	nol4la	0	0.906373	0.209	0.083	0	BC	nol4la
ENSDARG00000075147~~lrrc38a	8.26525e-38	0.627884	0.098	0.018	2.68786e-33	BC	lrrc38a	1.357e-253	0.510828	0.073	0.014	4.41295e-249	BC	lrrc38a
ENSDARG00000075156~~tbc1d4	1.24445e-110	1.35322	0.363	0.093	4.04695e-106	BC	tbc1d4	0	0.970136	0.175	0.06	0	BC	tbc1d4
ENSDARG00000075542~~zfhx4	1.14522e-201	2.59087	0.618	0.183	3.72425e-197	BC	zfhx4	0	1.90376	0.531	0.255	0	BC	zfhx4
ENSDARG00000075597~~flrt1b	2.87961e-76	0.811557	0.127	0.015	9.3645e-72	BC	flrt1b	0	0.860343	0.105	0.012	0	BC	flrt1b
ENSDARG00000075831~~slc7a8a	1.67221e-19	0.605379	0.111	0.038	5.43802e-15	BC	slc7a8a	1.75645e-63	0.572984	0.166	0.114	5.71197e-59	BC	slc7a8a
ENSDARG00000075837~~si:dkey-1d7.3	0	1.71101	0.327	0.009	0	BC	si:dkey-1d7.3	0	1.80082	0.257	0.012	0	BC	si:dkey-1d7.3
ENSDARG00000076002~~osbpl5	1.16008e-40	0.952539	0.372	0.193	3.77257e-36	BC	osbpl5	5.77335e-126	0.717702	0.201	0.124	1.87749e-121	BC	osbpl5
ENSDARG00000076280~~ppp1r1b	0	1.93179	0.43	0.016	0	BC	ppp1r1b	0	2.04789	0.381	0.042	0	BC	ppp1r1b
ENSDARG00000076804~~ttyh1	1.47554e-123	1.20098	0.695	0.39	4.79846e-119	BC	ttyh1	0	1.2759	0.344	0.119	0	BC	ttyh1
ENSDARG00000076962~~gdpd5b	1.77163e-200	1.62448	0.452	0.083	5.76133e-196	BC	gdpd5b	2.00134e-63	0.638876	0.096	0.054	6.50836e-59	BC	gdpd5b
ENSDARG00000077002~~igsf3	3.69396e-68	0.842987	0.789	0.545	1.20128e-63	BC	igsf3	2.2837e-222	0.82781	0.444	0.327	7.42658e-218	BC	igsf3
ENSDARG00000077188~~atrnl1a	1.28168e-272	2.38754	0.757	0.239	4.16802e-268	BC	atrnl1a	0	1.98288	0.262	0.053	0	BC	atrnl1a
ENSDARG00000077341~~ppp1r14c	4.42209e-284	2.00036	0.649	0.139	1.43806e-279	BC	ppp1r14c	0	1.30081	0.429	0.209	0	BC	ppp1r14c
ENSDARG00000077465~~sorcs2	1.69582e-82	0.863059	0.495	0.19	5.51482e-78	BC	sorcs2	0	1.48528	0.39	0.117	0	BC	sorcs2
ENSDARG00000077582~~ank3b	1.82832e-51	1.0186	0.262	0.088	5.9457e-47	BC	ank3b	0	1.01019	0.216	0.076	0	BC	ank3b
ENSDARG00000077633~~magixb	2.15292e-57	0.91444	0.205	0.05	7.00128e-53	BC	magixb	0	0.831822	0.083	0.006	0	BC	magixb
ENSDARG00000077791~~brsk2b	7.09545e-273	2.36924	0.971	0.657	2.30744e-268	BC	brsk2b	0	1.75763	0.847	0.507	0	BC	brsk2b
ENSDARG00000077967~~si:ch211-140m22.7	6.73717e-42	0.8791	0.483	0.303	2.19093e-37	BC	si:ch211-140m22.7	3.30116e-276	0.742081	0.139	0.047	1.07354e-271	BC	si:ch211-140m22.7
ENSDARG00000078088~~si:ch211-186j3.6	5.60421e-23	0.770536	0.205	0.089	1.82249e-18	BC	si:ch211-186j3.6	3.88853e-288	1.11621	0.159	0.056	1.26455e-283	BC	si:ch211-186j3.6
ENSDARG00000078132~~tex2l	1.19341e-281	1.08359	0.166	0.003	3.88097e-277	BC	tex2l	0	0.776	0.092	0.005	0	BC	tex2l
ENSDARG00000078149~~grin2ca	4.99369e-268	1.52199	0.19	0.006	1.62395e-263	BC	grin2ca	0	0.717984	0.064	0.005	0	BC	grin2ca
ENSDARG00000078187~~slc12a5b	8.19849e-191	1.64776	0.284	0.031	2.66615e-186	BC	slc12a5b	0	1.75062	0.229	0.027	0	BC	slc12a5b
ENSDARG00000078302~~brinp1	1.94929e-43	0.918225	0.187	0.053	6.33908e-39	BC	brinp1	1.91425e-109	0.567594	0.062	0.022	6.22514e-105	BC	brinp1
ENSDARG00000078440~~ccdc88aa	1.22805e-199	1.58926	0.69	0.223	3.99363e-195	BC	ccdc88aa	0	1.47724	0.336	0.074	0	BC	ccdc88aa
ENSDARG00000078441~~ppip5k2	9.0522e-141	1.49078	0.579	0.21	2.94378e-136	BC	ppip5k2	2.09961e-78	0.540996	0.14	0.086	6.82792e-74	BC	ppip5k2
ENSDARG00000078527~~lingo4b	6.98014e-127	1.33414	0.372	0.085	2.26994e-122	BC	lingo4b	0	1.45449	0.248	0.031	0	BC	lingo4b
ENSDARG00000078536~~si:ch211-158d24.2	1.75605e-124	1.34261	0.57	0.209	5.71067e-120	BC	si:ch211-158d24.2	0	1.18413	0.356	0.158	0	BC	si:ch211-158d24.2
ENSDARG00000078778~~lrch1	1.13326e-67	1.11433	0.485	0.241	3.68535e-63	BC	lrch1	0	0.927768	0.215	0.075	0	BC	lrch1
ENSDARG00000078839~~LRRTM4	8.2851e-42	1.22932	0.224	0.075	2.69431e-37	BC	LRRTM4	1.85575e-36	0.654037	0.13	0.094	6.03489e-32	BC	LRRTM4
ENSDARG00000078902~~rims1b	1.95629e-19	0.660786	0.399	0.281	6.36185e-15	BC	rims1b	0	0.97641	0.231	0.097	0	BC	rims1b
ENSDARG00000079414~~sez6b	2.77585e-44	1.04354	0.255	0.09	9.02706e-40	BC	sez6b	0	1.27018	0.226	0.072	0	BC	sez6b
ENSDARG00000079455~~nlgn4xa	9.65974e-174	2.226	0.519	0.138	3.14135e-169	BC	nlgn4xa	0	1.87792	0.219	0.026	0	BC	nlgn4xa
ENSDARG00000079542~~stard13a	0	3.008	0.666	0.037	0	BC	stard13a	0	2.46873	0.393	0.016	0	BC	stard13a
ENSDARG00000079611~~sema4c	2.27429e-264	2.28007	0.925	0.475	7.39598e-260	BC	sema4c	0	2.00771	0.537	0.199	0	BC	sema4c
ENSDARG00000079840~~kcnma1a	2.37425e-188	1.71008	0.829	0.39	7.72105e-184	BC	kcnma1a	0	1.22696	0.543	0.225	0	BC	kcnma1a
ENSDARG00000086288~~scg3	0	2.2121	0.693	0.106	0	BC	scg3	0	1.15502	0.555	0.269	0	BC	scg3
ENSDARG00000087100~~ntng2b	4.53072e-22	0.712437	0.183	0.077	1.47339e-17	BC	ntng2b	0	0.836543	0.149	0.038	0	BC	ntng2b
ENSDARG00000087224~~si:ch73-380n15.2	1.41124e-141	1.03095	0.185	0.016	4.58935e-137	BC	si:ch73-380n15.2	0	1.80632	0.229	0.009	0	BC	si:ch73-380n15.2
ENSDARG00000088073~~fam110b	7.38106e-136	1.26973	0.716	0.358	2.40032e-131	BC	fam110b	1.41265e-188	0.67463	0.298	0.185	4.59395e-184	BC	fam110b
ENSDARG00000088593~~chst1	5.55198e-170	1.06275	0.176	0.011	1.8055e-165	BC	chst1	0	1.02241	0.167	0.024	0	BC	chst1
ENSDARG00000088842~~KCNB2	1.61932e-09	0.545019	0.072	0.029	5.26604e-05	BC	KCNB2	1.73848e-84	0.962076	0.056	0.021	5.65355e-80	BC	KCNB2
ENSDARG00000089009~~frmpd1b	5.86129e-16	0.605536	0.372	0.266	1.90609e-11	BC	frmpd1b	1.06864e-145	0.627616	0.302	0.21	3.47523e-141	BC	frmpd1b
ENSDARG00000089066~~nhsl2	9.63037e-43	0.993176	0.409	0.221	3.1318e-38	BC	nhsl2	0	1.13378	0.202	0.07	0	BC	nhsl2
ENSDARG00000089292~~adgrl1a	0	2.20275	0.683	0.111	0	BC	adgrl1a	0	1.63085	0.595	0.218	0	BC	adgrl1a
ENSDARG00000089766~~nrg3b	8.49399e-33	0.790288	0.233	0.086	2.76225e-28	BC	nrg3b	0	1.40817	0.255	0.079	0	BC	nrg3b
ENSDARG00000089767~~rnf130	1.78205e-46	0.943024	0.45	0.258	5.79523e-42	BC	rnf130	4.66334e-115	0.62707	0.209	0.133	1.51652e-110	BC	rnf130
ENSDARG00000090035~~rtn4r	1.54366e-25	0.702215	0.18	0.065	5.01999e-21	BC	rtn4r	5.16781e-96	1.07695	0.163	0.101	1.68057e-91	BC	rtn4r
ENSDARG00000090654~~gak	5.04489e-20	0.667249	0.402	0.291	1.6406e-15	BC	gak	1.91392e-93	0.52981	0.181	0.115	6.22406e-89	BC	gak
ENSDARG00000090656~~tomm20a	2.0159e-07	0.532823	0.336	0.295	0.00655572	BC	tomm20a	4.3484e-71	0.508721	0.188	0.131	1.4141e-66	BC	tomm20a
ENSDARG00000090724~~scn12aa	0	1.35281	0.221	0.004	0	BC	scn12aa	0	0.90536	0.09	0.006	0	BC	scn12aa
ENSDARG00000091317~~hunk	4.99783e-176	1.48508	0.267	0.03	1.62529e-171	BC	hunk	0	1.3728	0.214	0.04	0	BC	hunk
ENSDARG00000092142~~BX663503.1	1.3031e-210	1.32073	0.252	0.02	4.23767e-206	BC	BX663503.1	0	1.6429	0.265	0.018	0	BC	BX663503.1
ENSDARG00000093232~~CR847566.1	8.55809e-12	0.553378	0.142	0.071	2.78309e-07	BC	CR847566.1	0	0.781194	0.104	0.024	0	BC	CR847566.1
ENSDARG00000093357~~nyap2b	8.09087e-75	1.10738	0.341	0.108	2.63115e-70	BC	nyap2b	0	0.982332	0.285	0.122	0	BC	nyap2b
ENSDARG00000094605~~si:ch211-154e10.1	1.04795e-97	0.764248	0.116	0.009	3.40794e-93	BC	si:ch211-154e10.1	0	0.776495	0.097	0.007	0	BC	si:ch211-154e10.1
ENSDARG00000094980~~CR792454.1	1.04229e-69	0.780279	0.127	0.017	3.38952e-65	BC	CR792454.1	0	1.07268	0.197	0.044	0	BC	CR792454.1
ENSDARG00000095016~~CR932983.2	2.37288e-191	0.729824	0.098	0.001	7.7166e-187	BC	CR932983.2	0	0.730331	0.09	0.001	0	BC	CR932983.2
ENSDARG00000095170~~lrrfip1b	1.40408e-182	1.74048	0.781	0.401	4.56608e-178	BC	lrrfip1b	0	1.58984	0.536	0.183	0	BC	lrrfip1b
ENSDARG00000096756~~si:ch211-196c10.13	1.41077e-232	0.993378	0.101	0	4.58783e-228	BC	si:ch211-196c10.13	2.96537e-206	0.764275	0.057	0.01	9.64339e-202	BC	si:ch211-196c10.13
ENSDARG00000097160~~si:ch211-121j5.4	1.35344e-142	0.692293	0.096	0.003	4.40138e-138	BC	si:ch211-121j5.4	0	0.627079	0.076	0.002	0	BC	si:ch211-121j5.4
ENSDARG00000097369~~FP017274.1	6.41375e-22	0.68612	0.233	0.112	2.08575e-17	BC	FP017274.1	0	0.927031	0.333	0.146	0	BC	FP017274.1
ENSDARG00000097897~~sgip1a	2.23153e-157	0.961645	0.928	0.893	7.25694e-153	BC	sgip1a	0	1.74073	0.65	0.275	0	BC	sgip1a
ENSDARG00000098057~~dscaml1	0	3.23056	0.916	0.16	0	BC	dscaml1	0	2.42613	0.842	0.238	0	BC	dscaml1
ENSDARG00000098076~~kcnq1.2	1.76399e-263	0.933137	0.135	0.001	5.73649e-259	BC	kcnq1.2	0	0.599446	0.065	0.005	0	BC	kcnq1.2
ENSDARG00000098161~~cntn4	1.89276e-64	1.29582	0.401	0.149	6.15525e-60	BC	cntn4	0	1.92181	0.241	0.05	0	BC	cntn4
ENSDARG00000098368~~aplp1	2.43128e-31	0.513868	0.709	0.461	7.90652e-27	BC	aplp1	7.31156e-146	0.84083	0.245	0.151	2.37772e-141	BC	aplp1
ENSDARG00000098652~~pcdh11	1.58663e-91	1.53915	0.57	0.233	5.15972e-87	BC	pcdh11	0	1.77179	0.38	0.158	0	BC	pcdh11
ENSDARG00000098769~~slitrk6	0	3.01853	0.644	0.018	0	BC	slitrk6	0	2.30706	0.333	0.027	0	BC	slitrk6
ENSDARG00000098788~~pcdh2g28	8.27041e-95	0.607379	0.932	0.911	2.68954e-90	BC	pcdh2g28	1.43171e-271	0.667766	0.543	0.415	4.65591e-267	BC	pcdh2g28
ENSDARG00000098809~~snap91a	1.56799e-24	0.838284	0.25	0.124	5.0991e-20	BC	snap91a	0	0.898291	0.206	0.071	0	BC	snap91a
ENSDARG00000099113~~UNC13B	2.32083e-24	0.819084	0.276	0.145	7.54735e-20	BC	UNC13B	0	1.31393	0.251	0.076	0	BC	UNC13B
ENSDARG00000099203~~atp1b2a	4.74028e-140	1.33817	0.704	0.321	1.54154e-135	BC	atp1b2a	0	1.32753	0.662	0.395	0	BC	atp1b2a
ENSDARG00000099283~~epb41a	1.50543e-211	1.11283	0.959	0.816	4.89566e-207	BC	epb41a	0	0.899515	0.763	0.615	0	BC	epb41a
ENSDARG00000099729~~pcdh10a	3.35902e-102	1.21359	0.396	0.107	1.09235e-97	BC	pcdh10a	0	1.36847	0.327	0.119	0	BC	pcdh10a
ENSDARG00000099732~~gfra1a	4.69543e-209	1.89876	0.795	0.326	1.52695e-204	BC	gfra1a	8.70328e-302	0.927107	0.15	0.049	2.83031e-297	BC	gfra1a
ENSDARG00000099793~~cspg5b	6.54159e-86	0.921812	0.82	0.591	2.12733e-81	BC	cspg5b	0	1.027	0.509	0.31	0	BC	cspg5b
ENSDARG00000099850~~iqsec3a	1.00816e-166	1.57947	0.45	0.095	3.27855e-162	BC	iqsec3a	0	1.5345	0.227	0.077	0	BC	iqsec3a
ENSDARG00000099919~~CR407584.1	1.88759e-27	0.557007	0.111	0.029	6.13844e-23	BC	CR407584.1	0	1.48531	0.125	0.015	0	BC	CR407584.1
ENSDARG00000100166~~si:dkeyp-9d4.3	7.85624e-88	1.30612	0.457	0.186	2.55485e-83	BC	si:dkeyp-9d4.3	0	1.53585	0.275	0.035	0	BC	si:dkeyp-9d4.3
ENSDARG00000100308~~SEMA4F	3.45902e-291	2.68402	0.866	0.339	1.12487e-286	BC	SEMA4F	0	1.84323	0.458	0.187	0	BC	SEMA4F
ENSDARG00000100402~~fgd1	3.16774e-39	0.913987	0.223	0.078	1.03015e-34	BC	fgd1	6.14723e-178	0.520878	0.096	0.033	1.99908e-173	BC	fgd1
ENSDARG00000100456~~ptk2aa	6.23375e-11	0.635182	0.322	0.256	2.02722e-06	BC	ptk2aa	1.94597e-200	0.71343	0.204	0.106	6.32829e-196	BC	ptk2aa
ENSDARG00000100889~~galnt18a	2.36777e-21	0.691761	0.14	0.052	7.7e-17	BC	galnt18a	1.37438e-114	0.548078	0.078	0.03	4.46947e-110	BC	galnt18a
ENSDARG00000100958~~HECW1	3.17353e-39	0.878964	0.293	0.124	1.03203e-34	BC	HECW1	5.56421e-161	0.581724	0.125	0.054	1.80948e-156	BC	HECW1
ENSDARG00000101471~~fgd4a	6.89856e-126	1.35079	0.601	0.253	2.24341e-121	BC	fgd4a	0	1.25556	0.261	0.072	0	BC	fgd4a
ENSDARG00000101606~~rims2a	4.49597e-75	1.16068	0.288	0.079	1.46209e-70	BC	rims2a	4.94565e-140	0.628572	0.145	0.072	1.60833e-135	BC	rims2a
ENSDARG00000101704~~lrrc24	7.70722e-107	0.854011	0.135	0.012	2.50639e-102	BC	lrrc24	3.0345e-232	0.520164	0.081	0.019	9.86819e-228	BC	lrrc24
ENSDARG00000101735~~chn1	2.34467e-125	1.27465	0.688	0.357	7.62488e-121	BC	chn1	7.86117e-263	0.839795	0.257	0.137	2.55645e-258	BC	chn1
ENSDARG00000101766~~ptmab	8.2797e-53	0.565267	0.837	0.713	2.69256e-48	BC	ptmab	0	0.551306	0.97	0.944	0	BC	ptmab
ENSDARG00000101858~~DST	1.25073e-33	0.783411	0.483	0.345	4.06736e-29	BC	DST	0	0.978192	0.223	0.08	0	BC	DST
ENSDARG00000102061~~b3galt2	9.77724e-164	1.25544	0.247	0.027	3.17956e-159	BC	b3galt2	0	1.39052	0.253	0.081	0	BC	b3galt2
ENSDARG00000102310~~si:ch211-156l18.8	1.96412e-250	1.42021	0.289	0.023	6.38731e-246	BC	si:ch211-156l18.8	0	2.05426	0.287	0.009	0	BC	si:ch211-156l18.8
ENSDARG00000102730~~mapk10	3.33428e-103	1.07794	0.69	0.317	1.08431e-98	BC	mapk10	0	1.05783	0.328	0.159	0	BC	mapk10
ENSDARG00000102824~~pcdh10b	9.47269e-11	0.692476	0.322	0.249	3.08052e-06	BC	pcdh10b	1.05361e-250	1.20694	0.202	0.094	3.42634e-246	BC	pcdh10b
ENSDARG00000102879~~myt1b	0	2.78324	0.8	0.09	0	BC	myt1b	8.61178e-198	0.612713	0.391	0.26	2.80055e-193	BC	myt1b
ENSDARG00000102975~~nsg2	0	3.00813	0.815	0.186	0	BC	nsg2	0	2.55777	0.531	0.107	0	BC	nsg2
ENSDARG00000103919~~si:ch73-1a9.3	2.42833e-64	0.667258	0.777	0.637	7.89693e-60	BC	si:ch73-1a9.3	0	0.794184	0.922	0.886	0	BC	si:ch73-1a9.3
ENSDARG00000103937~~ndrg4	2.15041e-175	1.4392	0.789	0.343	6.99315e-171	BC	ndrg4	0	1.54162	0.471	0.158	0	BC	ndrg4
ENSDARG00000104314~~nrg1	4.30006e-08	0.656005	0.25	0.184	0.00139838	BC	nrg1	0	1.05544	0.129	0.03	0	BC	nrg1
ENSDARG00000104409~~tnk2b	7.78117e-215	1.75079	0.587	0.151	2.53044e-210	BC	tnk2b	0	1.89669	0.344	0.033	0	BC	tnk2b
ENSDARG00000104435~~si:ch73-217b7.1	7.20022e-92	1.1905	0.467	0.166	2.34151e-87	BC	si:ch73-217b7.1	7.04713e-285	0.746682	0.192	0.077	2.29173e-280	BC	si:ch73-217b7.1
ENSDARG00000104665~~kirrel3l	8.90129e-193	2.07592	0.68	0.243	2.8947e-188	BC	kirrel3l	0	1.73523	0.409	0.154	0	BC	kirrel3l
ENSDARG00000105009~~ddah2	7.31501e-213	1.74	0.67	0.203	2.37884e-208	BC	ddah2	0	1.0675	0.318	0.135	0	BC	ddah2
ENSDARG00000105121~~FAM135B	2.2049e-55	0.96917	0.479	0.245	7.17033e-51	BC	FAM135B	0	1.17238	0.154	0.004	0	BC	FAM135B
ENSDARG00000105178~~erc2	4.10458e-20	0.724781	0.229	0.117	1.33481e-15	BC	erc2	2.78478e-164	0.64658	0.206	0.114	9.05611e-160	BC	erc2
ENSDARG00000105296~~AP3B2	7.10632e-11	0.596498	0.276	0.197	2.31097e-06	BC	AP3B2	1.13314e-107	0.500511	0.164	0.095	3.68496e-103	BC	AP3B2
ENSDARG00000105441~~pcdh11	1.7433e-68	1.37936	0.486	0.204	5.6692e-64	BC	pcdh11	0	1.54572	0.279	0.104	0	BC	pcdh11
ENSDARG00000107353~~BX957322.3	1.51589e-102	1.03385	0.195	0.027	4.92967e-98	BC	BX957322.3	0	0.975634	0.174	0.054	0	BC	BX957322.3
ENSDARG00000110032~~SAMD5	0	2.76895	0.726	0.055	0	BC	SAMD5	0	2.02604	0.481	0.095	0	BC	SAMD5
ENSDARG00000110727~~ENSDARG00000110727	4.62485e-93	1.25214	0.308	0.077	1.504e-88	BC	ENSDARG00000110727	0	0.900732	0.122	0.007	0	BC	ENSDARG00000110727
ENSDARG00000112993~~efnb3a	8.83109e-22	0.527135	0.553	0.48	2.87187e-17	BC	efnb3a	2.83435e-130	0.664696	0.361	0.273	9.2173e-126	BC	efnb3a
ENSDARG00000113702~~RIMS2	1.25417e-194	1.5811	0.574	0.146	4.07855e-190	BC	RIMS2	0	0.941471	0.305	0.155	0	BC	RIMS2
ENSDARG00000117434~~CABZ01073166.1	3.38972e-242	1.3304	0.233	0.014	1.10234e-237	BC	CABZ01073166.1	2.30899e-210	0.53378	0.058	0.01	7.50883e-206	BC	CABZ01073166.1
ENSDARG00000117747~~CABZ01056843.1	2.43932e-253	2.0568	0.786	0.288	7.93268e-249	BC	CABZ01056843.1	0	1.30572	0.411	0.166	0	BC	CABZ01056843.1
ENSDARG00000000068~~slc9a3r1a	1.44887e-221	1.00353	0.403	0.133	4.71172e-217	Cone	slc9a3r1a	0	0.885478	0.13	0.016	0	Cone	slc9a3r1a
ENSDARG00000000943~~dzip1	0	1.20737	0.668	0.196	0	Cone	dzip1	0	0.732683	0.15	0.044	0	Cone	dzip1
ENSDARG00000001913~~palmda	1.45004e-151	0.716558	0.277	0.074	4.71554e-147	Cone	palmda	0	0.813059	0.124	0.006	0	Cone	palmda
ENSDARG00000001976~~fkbp16	0	1.36851	0.858	0.247	0	Cone	fkbp16	0	1.5095	0.39	0.069	0	Cone	fkbp16
ENSDARG00000002230~~sypb	7.70542e-206	0.903076	0.513	0.188	2.5058e-201	Cone	sypb	0	1.64614	0.584	0.236	0	Cone	sypb
ENSDARG00000002445~~prdm1a	0	2.44573	0.983	0.172	0	Cone	prdm1a	0	1.78799	0.307	0.019	0	Cone	prdm1a
ENSDARG00000002564~~syngr1a	2.28587e-181	0.804239	0.34	0.098	7.43365e-177	Cone	syngr1a	0	1.35876	0.369	0.088	0	Cone	syngr1a
ENSDARG00000002748~~sema6d	0	2.36645	0.733	0.03	0	Cone	sema6d	0	1.13276	0.365	0.106	0	Cone	sema6d
ENSDARG00000003495~~madd	0	1.47658	0.923	0.422	0	Cone	madd	0	0.781319	0.418	0.239	0	Cone	madd
ENSDARG00000004074~~bach2b	0	0.812268	0.981	0.826	0	Cone	bach2b	0	0.704647	0.642	0.465	0	Cone	bach2b
ENSDARG00000004643~~cdhr1a	5.68599e-125	0.638523	0.243	0.067	1.84908e-120	Cone	cdhr1a	0	1.32218	0.195	0.011	0	Cone	cdhr1a
ENSDARG00000004697~~rxrgb	0	2.24946	0.788	0.085	0	Cone	rxrgb	0	1.6633	0.351	0.034	0	Cone	rxrgb
ENSDARG00000004836~~dnajc5ab	4.0448e-229	0.843928	0.604	0.247	1.31537e-224	Cone	dnajc5ab	0	0.843592	0.4	0.203	0	Cone	dnajc5ab
ENSDARG00000005092~~cep89	1.57135e-131	0.723998	0.336	0.126	5.11003e-127	Cone	cep89	2.61779e-215	0.549258	0.104	0.031	8.51306e-211	Cone	cep89
ENSDARG00000005593~~rxrga	0	1.6208	0.376	0.081	0	Cone	rxrga	0	1.77338	0.278	0.033	0	Cone	rxrga
ENSDARG00000005645~~robo3	0	1.66084	0.984	0.417	0	Cone	robo3	0	1.40353	0.588	0.277	0	Cone	robo3
ENSDARG00000005754~~ptprfb	5.61831e-194	0.549556	0.981	0.921	1.82707e-189	Cone	ptprfb	0	0.982407	0.624	0.444	0	Cone	ptprfb
ENSDARG00000005776~~guk1b	0	1.00563	0.268	0.029	0	Cone	guk1b	0	1.71086	0.316	0.041	0	Cone	guk1b
ENSDARG00000005800~~ampd3a	5.73507e-89	0.54008	0.161	0.042	1.86505e-84	Cone	ampd3a	0	0.630516	0.146	0.036	0	Cone	ampd3a
ENSDARG00000005989~~rgl1	1.79229e-78	0.532437	0.509	0.326	5.82854e-74	Cone	rgl1	1.71553e-189	0.591931	0.197	0.094	5.57891e-185	Cone	rgl1
ENSDARG00000006467~~pcdh8	0	2.8307	0.389	0.013	0	Cone	pcdh8	0	1.96584	0.205	0.05	0	Cone	pcdh8
ENSDARG00000006604~~nectin3b	2.60296e-127	0.570907	0.677	0.534	8.46483e-123	Cone	nectin3b	6.68353e-196	0.707153	0.221	0.113	2.17348e-191	Cone	nectin3b
ENSDARG00000007179~~sash1a	0	2.2547	0.909	0.467	0	Cone	sash1a	0	1.42462	0.237	0.048	0	Cone	sash1a
ENSDARG00000007788~~atp2b1b	0	2.3744	0.751	0.069	0	Cone	atp2b1b	0	2.33364	0.629	0.105	0	Cone	atp2b1b
ENSDARG00000008034~~skib	4.23502e-114	0.547885	0.65	0.479	1.37723e-109	Cone	skib	1.3667e-141	0.543428	0.192	0.102	4.44451e-137	Cone	skib
ENSDARG00000008127~~pcdh15b	0	1.94646	0.528	0.122	0	Cone	pcdh15b	0	2.53503	0.378	0.02	0	Cone	pcdh15b
ENSDARG00000008413~~atp11a	0	1.74072	0.957	0.567	0	Cone	atp11a	0	2.42153	0.669	0.115	0	Cone	atp11a
ENSDARG00000008487~~dmd	6.11396e-121	0.73571	0.522	0.306	1.98826e-116	Cone	dmd	0	1.57926	0.386	0.101	0	Cone	dmd
ENSDARG00000008548~~arhgap12a	0	1.57773	0.511	0.052	0	Cone	arhgap12a	0	0.776401	0.129	0.015	0	Cone	arhgap12a
ENSDARG00000008767~~tle2b	4.79538e-281	1.0445	0.41	0.1	1.55946e-276	Cone	tle2b	1.78493e-306	0.651738	0.146	0.043	5.80459e-302	Cone	tle2b
ENSDARG00000008808~~eml2	0	1.23749	0.762	0.293	0	Cone	eml2	0	0.716997	0.135	0.029	0	Cone	eml2
ENSDARG00000009418~~mef2cb	2.94406e-251	1.30329	0.455	0.154	9.57409e-247	Cone	mef2cb	0	2.43633	0.41	0.028	0	Cone	mef2cb
ENSDARG00000009733~~kif21b	6.95211e-204	0.707917	0.76	0.359	2.26083e-199	Cone	kif21b	1.24067e-292	0.532497	0.326	0.16	4.03466e-288	Cone	kif21b
ENSDARG00000009830~~hdlbpa	1.12371e-84	0.574415	0.327	0.153	3.65432e-80	Cone	hdlbpa	6.1159e-170	0.623073	0.295	0.182	1.98889e-165	Cone	hdlbpa
ENSDARG00000009839~~fam117bb	0	1.1862	0.847	0.436	0	Cone	fam117bb	8.88203e-301	0.888255	0.199	0.077	2.88844e-296	Cone	fam117bb
ENSDARG00000009901~~slc38a5a	4.20038e-161	0.70159	0.199	0.036	1.36596e-156	Cone	slc38a5a	0	0.884321	0.136	0.01	0	Cone	slc38a5a
ENSDARG00000010042~~dnm1a	4.31896e-237	0.918363	0.575	0.229	1.40453e-232	Cone	dnm1a	0	0.782494	0.242	0.094	0	Cone	dnm1a
ENSDARG00000010601~~mtmr10	2.93699e-152	0.793297	0.296	0.092	9.55108e-148	Cone	mtmr10	0	0.636185	0.101	0.017	0	Cone	mtmr10
ENSDARG00000010602~~zgc:112294	0	1.4572	0.701	0.127	0	Cone	zgc:112294	0	1.37924	0.249	0.014	0	Cone	zgc:112294
ENSDARG00000010680~~gngt2a	2.28529e-125	0.755398	0.129	0.018	7.43178e-121	Cone	gngt2a	0	1.68813	0.53	0.219	0	Cone	gngt2a
ENSDARG00000010710~~msi1	0	0.832189	1	0.851	0	Cone	msi1	0	2.31147	0.855	0.274	0	Cone	msi1
ENSDARG00000010727~~ttyh2l	1.53629e-296	1.11088	0.455	0.128	4.99602e-292	Cone	ttyh2l	0	1.1801	0.266	0.063	0	Cone	ttyh2l
ENSDARG00000010958~~glmnb	0	1.55941	0.533	0.053	0	Cone	glmnb	0	1.23994	0.211	0.013	0	Cone	glmnb
ENSDARG00000011334~~ncaldb	3.80166e-124	0.730715	0.285	0.097	1.2363e-119	Cone	ncaldb	0	1.06146	0.157	0.013	0	Cone	ncaldb
ENSDARG00000011640~~syt5b	0	1.17877	0.489	0.099	0	Cone	syt5b	0	1.13408	0.733	0.31	0	Cone	syt5b
ENSDARG00000011769~~cpm	4.40816e-154	0.543862	0.101	0.005	1.43353e-149	Cone	cpm	0	0.618423	0.086	0.007	0	Cone	cpm
ENSDARG00000011989~~crx	0	1.11141	0.631	0.173	0	Cone	crx	0	0.846459	0.425	0.191	0	Cone	crx
ENSDARG00000012126~~zgc:109965	0	1.50109	0.893	0.189	0	Cone	zgc:109965	0	2.19173	0.486	0.066	0	Cone	zgc:109965
ENSDARG00000012340~~ptpn11b	4.06286e-233	0.831993	0.649	0.315	1.32124e-228	Cone	ptpn11b	0	0.625748	0.172	0.056	0	Cone	ptpn11b
ENSDARG00000012586~~fmnl2a	0	2.53005	0.958	0.417	0	Cone	fmnl2a	0	2.27234	0.482	0.044	0	Cone	fmnl2a
ENSDARG00000012981~~osbpl7	9.79155e-207	0.732635	0.181	0.019	3.18421e-202	Cone	osbpl7	0	0.95089	0.143	0.01	0	Cone	osbpl7
ENSDARG00000013134~~prph2la	0	1.69015	0.479	0.019	0	Cone	prph2la	0	0.878977	0.139	0.011	0	Cone	prph2la
ENSDARG00000013730~~slc4a4a	0	1.61028	0.905	0.395	0	Cone	slc4a4a	0	2.13607	0.484	0.037	0	Cone	slc4a4a
ENSDARG00000013853~~lmo4a	0	1.43998	0.511	0.074	0	Cone	lmo4a	5.59458e-231	0.56649	0.097	0.026	1.81936e-226	Cone	lmo4a
ENSDARG00000014233~~sept8b	4.92062e-167	0.710588	0.173	0.025	1.60019e-162	Cone	sept8b	0	0.733062	0.115	0.011	0	Cone	sept8b
ENSDARG00000014439~~dgkza	0	2.24508	0.952	0.461	0	Cone	dgkza	0	1.05978	0.416	0.17	0	Cone	dgkza
ENSDARG00000014962~~ppp3cca	0	1.06699	0.797	0.378	0	Cone	ppp3cca	0	1.22972	0.468	0.19	0	Cone	ppp3cca
ENSDARG00000015059~~daam1a	0	2.23154	0.988	0.573	0	Cone	daam1a	0	0.981434	0.609	0.293	0	Cone	daam1a
ENSDARG00000015589~~ankrd33bb	1.05453e-246	0.761754	0.157	0.006	3.42932e-242	Cone	ankrd33bb	0	0.563189	0.073	0.001	0	Cone	ankrd33bb
ENSDARG00000016263~~zdhhc5a	0	1.01837	0.875	0.418	0	Cone	zdhhc5a	6.79803e-275	0.663729	0.371	0.211	2.21072e-270	Cone	zdhhc5a
ENSDARG00000016429~~farp2	0	1.15373	0.939	0.361	0	Cone	farp2	0	1.75658	0.45	0.084	0	Cone	farp2
ENSDARG00000016464~~cdc42bpab	1.3041e-169	0.734673	0.597	0.29	4.24093e-165	Cone	cdc42bpab	0	1.1317	0.253	0.063	0	Cone	cdc42bpab
ENSDARG00000016480~~slc17a7a	3.40634e-155	0.765132	0.273	0.072	1.10774e-150	Cone	slc17a7a	0	0.573027	0.197	0.068	0	Cone	slc17a7a
ENSDARG00000016490~~rab11fip3	5.37986e-75	0.530222	0.491	0.324	1.74953e-70	Cone	rab11fip3	0	0.797393	0.23	0.091	0	Cone	rab11fip3
ENSDARG00000016667~~gabbr1b	0	1.47016	0.639	0.165	0	Cone	gabbr1b	2.73624e-304	0.702471	0.179	0.062	8.89825e-300	Cone	gabbr1b
ENSDARG00000017168~~nr2f1b	3.59248e-161	0.573033	0.102	0.004	1.16828e-156	Cone	nr2f1b	0	1.27113	0.232	0.023	0	Cone	nr2f1b
ENSDARG00000017274~~opn1sw2	4.35968e-138	1.53099	0.084	0.003	1.41777e-133	Cone	opn1sw2	0	3.9206	0.292	0.117	0	Cone	opn1sw2
ENSDARG00000017391~~unc13ba	2.10791e-92	0.626546	0.256	0.094	6.85493e-88	Cone	unc13ba	0	1.28147	0.247	0.055	0	Cone	unc13ba
ENSDARG00000017398~~slc44a5a	0	1.48839	0.988	0.316	0	Cone	slc44a5a	0	2.41493	0.419	0.031	0	Cone	slc44a5a
ENSDARG00000017429~~sphkap	2.25228e-147	0.661777	0.183	0.034	7.3244e-143	Cone	sphkap	0	0.613993	0.097	0.015	0	Cone	sphkap
ENSDARG00000017532~~kif25	0	0.991488	0.309	0.036	0	Cone	kif25	0	1.07694	0.168	0.005	0	Cone	kif25
ENSDARG00000017929~~ncoa2	0	0.602807	0.943	0.847	0	Cone	ncoa2	1.84751e-204	0.555733	0.607	0.489	6.0081e-200	Cone	ncoa2
ENSDARG00000018065~~ntm	0	5.10178	0.985	0.106	0	Cone	ntm	0	4.47829	0.928	0.058	0	Cone	ntm
ENSDARG00000019063~~fat1b	0	2.98874	0.548	0.012	0	Cone	fat1b	0	2.09747	0.217	0.009	0	Cone	fat1b
ENSDARG00000019208~~camsap1a	2.13139e-74	0.59791	0.229	0.095	6.93128e-70	Cone	camsap1a	6.62527e-195	0.585754	0.125	0.046	2.15454e-190	Cone	camsap1a
ENSDARG00000019235~~sema3aa	0	1.80074	0.741	0.127	0	Cone	sema3aa	0	1.86969	0.332	0.034	0	Cone	sema3aa
ENSDARG00000019566~~neurod1	0	1.35551	0.966	0.321	0	Cone	neurod1	0	2.09439	0.802	0.226	0	Cone	neurod1
ENSDARG00000019902~~rcvrn2	0	1.2341	0.32	0.021	0	Cone	rcvrn2	0	2.06856	0.446	0.101	0	Cone	rcvrn2
ENSDARG00000019917~~epb41l3b	0	2.3256	0.888	0.145	0	Cone	epb41l3b	0	1.04468	0.182	0.032	0	Cone	epb41l3b
ENSDARG00000020057~~bmpr2b	0	1.03918	0.998	0.936	0	Cone	bmpr2b	0	0.992101	0.529	0.333	0	Cone	bmpr2b
ENSDARG00000020123~~coq8aa	7.39665e-150	0.810976	0.382	0.153	2.40539e-145	Cone	coq8aa	4.56498e-271	0.751207	0.208	0.089	1.48453e-266	Cone	coq8aa
ENSDARG00000020475~~znrf1	0	0.989161	0.795	0.394	0	Cone	znrf1	0	0.810349	0.191	0.06	0	Cone	znrf1
ENSDARG00000020621~~ap1b1	7.41619e-160	0.777155	0.477	0.226	2.41175e-155	Cone	ap1b1	3.09438e-290	0.751178	0.263	0.123	1.00629e-285	Cone	ap1b1
ENSDARG00000020777~~cep85l	0	1.12385	0.982	0.409	0	Cone	cep85l	4.62031e-219	0.750043	0.328	0.196	1.50252e-214	Cone	cep85l
ENSDARG00000020847~~atp6v0a1a	2.05898e-144	0.761559	0.486	0.248	6.69581e-140	Cone	atp6v0a1a	0	1.43217	0.307	0.045	0	Cone	atp6v0a1a
ENSDARG00000020946~~auts2b	1.17627e-98	0.760105	0.289	0.126	3.82522e-94	Cone	auts2b	2.72471e-132	0.551504	0.094	0.036	8.86075e-128	Cone	auts2b
ENSDARG00000021137~~adgrv1	0	1.09532	0.934	0.397	0	Cone	adgrv1	0	1.08392	0.399	0.172	0	Cone	adgrv1
ENSDARG00000021163~~thrb	2.87443e-24	1.25498	0.495	0.515	9.34763e-20	Cone	thrb	0	2.55109	0.324	0.091	0	Cone	thrb
ENSDARG00000021345~~prph2lb	1.15041e-136	0.527939	0.112	0.01	3.74114e-132	Cone	prph2lb	0	0.577459	0.087	0.005	0	Cone	prph2lb
ENSDARG00000021389~~jag2b	5.40702e-297	1.0926	0.45	0.117	1.75836e-292	Cone	jag2b	9.22978e-149	0.529485	0.234	0.133	3.00152e-144	Cone	jag2b
ENSDARG00000021948~~tnc	0	3.21311	0.971	0.187	0	Cone	tnc	0	2.05678	0.561	0.135	0	Cone	tnc
ENSDARG00000022187~~usp6nl	7.68951e-58	0.565832	0.345	0.218	2.50063e-53	Cone	usp6nl	5.84515e-274	0.752488	0.179	0.068	1.90084e-269	Cone	usp6nl
ENSDARG00000023600~~sh3gl2a	4.58375e-86	0.579256	0.352	0.169	1.49063e-81	Cone	sh3gl2a	1.93e-306	0.640125	0.143	0.041	6.27637e-302	Cone	sh3gl2a
ENSDARG00000023886~~cacna2d4b	2.57572e-90	0.612133	0.168	0.046	8.37624e-86	Cone	cacna2d4b	0	1.07969	0.203	0.045	0	Cone	cacna2d4b
ENSDARG00000024694~~myo1b	0	0.851156	0.971	0.748	0	Cone	myo1b	0	0.959332	0.544	0.284	0	Cone	myo1b
ENSDARG00000025091~~ezrb	0	1.53127	0.748	0.225	0	Cone	ezrb	0	1.29206	0.287	0.055	0	Cone	ezrb
ENSDARG00000025220~~sppl3	0	1.41409	0.928	0.498	0	Cone	sppl3	9.46909e-157	0.650263	0.346	0.236	3.07935e-152	Cone	sppl3
ENSDARG00000025309~~dpf3	0	1.30067	0.96	0.503	0	Cone	dpf3	0	1.16671	0.519	0.257	0	Cone	dpf3
ENSDARG00000025667~~adgrb2	0	1.25099	0.435	0.083	0	Cone	adgrb2	3.74677e-236	0.633871	0.139	0.047	1.21845e-231	Cone	adgrb2
ENSDARG00000025902~~plekhg5a	0	2.0723	0.421	0.031	0	Cone	plekhg5a	0	1.50872	0.206	0.008	0	Cone	plekhg5a
ENSDARG00000026329~~arhgap29a	1.24843e-255	1.13081	0.636	0.376	4.0599e-251	Cone	arhgap29a	1.91008e-138	0.590566	0.141	0.067	6.21157e-134	Cone	arhgap29a
ENSDARG00000026595~~pafah1b1b	7.37683e-46	0.507934	0.277	0.166	2.39895e-41	Cone	pafah1b1b	6.4492e-128	0.517948	0.177	0.096	2.09728e-123	Cone	pafah1b1b
ENSDARG00000026840~~arhgap23b	0	1.87076	0.661	0.082	0	Cone	arhgap23b	0	1.85264	0.403	0.04	0	Cone	arhgap23b
ENSDARG00000027236~~rs1a	0	1.97813	0.482	0.048	0	Cone	rs1a	0	1.61833	0.613	0.249	0	Cone	rs1a
ENSDARG00000027423~~igf1ra	0	1.54834	0.982	0.635	0	Cone	igf1ra	0	0.954558	0.652	0.386	0	Cone	igf1ra
ENSDARG00000027424~~slc25a3a	1.55381e-264	0.827554	0.178	0.01	5.05298e-260	Cone	slc25a3a	0	1.08804	0.207	0.037	0	Cone	slc25a3a
ENSDARG00000027495~~elovl4b	1.66025e-183	0.584244	0.461	0.143	5.39914e-179	Cone	elovl4b	0	2.7252	0.692	0.099	0	Cone	elovl4b
ENSDARG00000028118~~dscamb	0	2.1476	0.999	0.342	0	Cone	dscamb	0	3.8668	0.986	0.134	0	Cone	dscamb
ENSDARG00000028173~~slc4a2a	0	1.5044	0.378	0.011	0	Cone	slc4a2a	0	0.819383	0.121	0.014	0	Cone	slc4a2a
ENSDARG00000028228~~zbtb18	0	0.899103	0.843	0.488	0	Cone	zbtb18	0	1.16279	0.493	0.199	0	Cone	zbtb18
ENSDARG00000028533~~macf1a	0	1.5403	0.994	0.867	0	Cone	macf1a	3.43087e-295	0.656713	0.633	0.475	1.11572e-290	Cone	macf1a
ENSDARG00000028793~~nlk2	0	0.799105	0.897	0.683	0	Cone	nlk2	0	1.89593	0.52	0.122	0	Cone	nlk2
ENSDARG00000029431~~si:ch211-147k10.5	9.10772e-116	0.507578	0.107	0.013	2.96183e-111	Cone	si:ch211-147k10.5	0	0.628315	0.089	0.013	0	Cone	si:ch211-147k10.5
ENSDARG00000029482~~ush2a	0	1.61048	0.998	0.301	0	Cone	ush2a	0	3.12297	0.695	0.047	0	Cone	ush2a
ENSDARG00000029639~~tomm70a	7.83199e-138	0.767541	0.382	0.159	2.54696e-133	Cone	tomm70a	3.9686e-142	0.59882	0.251	0.154	1.29059e-137	Cone	tomm70a
ENSDARG00000030107~~si:ch211-207i1.2	0	1.03138	0.905	0.598	0	Cone	si:ch211-207i1.2	9.51387e-296	0.678928	0.358	0.19	3.09391e-291	Cone	si:ch211-207i1.2
ENSDARG00000031108~~lrba	1.82824e-294	0.844153	0.786	0.624	5.94544e-290	Cone	lrba	0	0.898284	0.346	0.178	0	Cone	lrba
ENSDARG00000031600~~rd3	0	1.18289	0.375	0.043	0	Cone	rd3	0	1.48984	0.33	0.046	0	Cone	rd3
ENSDARG00000032056~~arl6	2.01904e-98	0.623763	0.198	0.059	6.56591e-94	Cone	arl6	0	0.830125	0.175	0.039	0	Cone	arl6
ENSDARG00000032838~~si:dkey-206f10.1	0	1.37414	0.366	0.016	0	Cone	si:dkey-206f10.1	0	1.54005	0.226	0.005	0	Cone	si:dkey-206f10.1
ENSDARG00000032849~~ndrg1a	2.25142e-260	0.992832	0.573	0.199	7.3216e-256	Cone	ndrg1a	0	1.9074	0.345	0.025	0	Cone	ndrg1a
ENSDARG00000034368~~hexb	8.59384e-184	0.783311	0.201	0.034	2.79472e-179	Cone	hexb	0	1.52308	0.304	0.042	0	Cone	hexb
ENSDARG00000034424~~atp1b2b	0	1.10819	0.571	0.149	0	Cone	atp1b2b	0	2.01301	0.434	0.035	0	Cone	atp1b2b
ENSDARG00000034473~~ttyh3a	0	1.12275	0.928	0.629	0	Cone	ttyh3a	0	1.54677	0.581	0.244	0	Cone	ttyh3a
ENSDARG00000034940~~slc1a7a	0	1.67934	0.54	0.044	0	Cone	slc1a7a	0	1.20189	0.22	0.028	0	Cone	slc1a7a
ENSDARG00000035273~~tmtc2b	0	1.3844	0.651	0.157	0	Cone	tmtc2b	3.90029e-135	0.533151	0.203	0.111	1.26837e-130	Cone	tmtc2b
ENSDARG00000035360~~mink1	1.7055e-89	0.528489	0.544	0.332	5.54629e-85	Cone	mink1	0	1.13752	0.204	0.031	0	Cone	mink1
ENSDARG00000035622~~xbp1	1.24363e-175	0.837399	0.415	0.152	4.04429e-171	Cone	xbp1	0	0.805301	0.409	0.237	0	Cone	xbp1
ENSDARG00000035870~~laptm4b	0	0.945717	0.807	0.383	0	Cone	laptm4b	0	1.01635	0.4	0.174	0	Cone	laptm4b
ENSDARG00000035952~~cdr2a	3.03057e-105	0.551763	0.134	0.026	9.85543e-101	Cone	cdr2a	2.34379e-283	0.636759	0.125	0.035	7.62199e-279	Cone	cdr2a
ENSDARG00000036096~~smad3a	1.46313e-129	0.740746	0.529	0.32	4.7581e-125	Cone	smad3a	2.95644e-243	0.674854	0.241	0.114	9.61435e-239	Cone	smad3a
ENSDARG00000036577~~atp6v0cb	8.61065e-188	0.814521	0.457	0.168	2.80018e-183	Cone	atp6v0cb	0	0.942111	0.689	0.387	0	Cone	atp6v0cb
ENSDARG00000036670~~aplnrb	1.39861e-73	0.556713	0.208	0.076	4.54829e-69	Cone	aplnrb	0	0.692775	0.109	0.011	0	Cone	aplnrb
ENSDARG00000037286~~si:dkey-30k22.7	0	0.866824	0.171	0.001	0	Cone	si:dkey-30k22.7	0	0.658952	0.09	0.001	0	Cone	si:dkey-30k22.7
ENSDARG00000037415~~dlgap1b	5.6924e-152	0.895304	0.319	0.115	1.85117e-147	Cone	dlgap1b	1.82763e-292	0.812917	0.15	0.047	5.94344e-288	Cone	dlgap1b
ENSDARG00000037487~~march1	7.31025e-161	0.68429	0.151	0.018	2.37729e-156	Cone	march1	0	1.64433	0.238	0.007	0	Cone	march1
ENSDARG00000037781~~acss2	1.56257e-145	0.727391	0.499	0.237	5.08148e-141	Cone	acss2	2.26162e-101	0.508424	0.193	0.117	7.3548e-97	Cone	acss2
ENSDARG00000038768~~mrpl12	6.03592e-152	0.801405	0.315	0.104	1.96288e-147	Cone	mrpl12	1.90311e-126	0.529592	0.2	0.114	6.18891e-122	Cone	mrpl12
ENSDARG00000038770~~zgc:103625	2.54317e-275	0.92495	0.226	0.021	8.27039e-271	Cone	zgc:103625	0	0.899997	0.162	0.026	0	Cone	zgc:103625
ENSDARG00000038859~~rgs20	2.00908e-112	0.604067	0.196	0.05	6.53354e-108	Cone	rgs20	0	1.09564	0.24	0.06	0	Cone	rgs20
ENSDARG00000038862~~kcnb2	1.60435e-287	0.987029	0.345	0.062	5.21736e-283	Cone	kcnb2	0	1.30865	0.209	0.014	0	Cone	kcnb2
ENSDARG00000038894~~tmx3a	0	2.19575	0.649	0.036	0	Cone	tmx3a	0	2.61518	0.61	0.07	0	Cone	tmx3a
ENSDARG00000039502~~eef1a1a	5.94479e-58	0.521572	0.246	0.117	1.93325e-53	Cone	eef1a1a	1.97539e-249	0.660536	0.138	0.046	6.42395e-245	Cone	eef1a1a
ENSDARG00000039521~~ssx2ipa	6.29771e-113	0.662213	0.183	0.046	2.04802e-108	Cone	ssx2ipa	0	0.583503	0.099	0.014	0	Cone	ssx2ipa
ENSDARG00000040198~~fstl5	0	1.89993	0.968	0.334	0	Cone	fstl5	0	1.45702	0.65	0.208	0	Cone	fstl5
ENSDARG00000040274~~scamp5b	2.43807e-180	0.720869	0.168	0.02	7.9286e-176	Cone	scamp5b	0	1.05351	0.2	0.025	0	Cone	scamp5b
ENSDARG00000040321~~rx2	4.616e-223	0.928571	0.41	0.129	1.50112e-218	Cone	rx2	0	0.761133	0.163	0.054	0	Cone	rx2
ENSDARG00000040777~~inhbb	0	1.80526	0.55	0.102	0	Cone	inhbb	8.39891e-261	0.617362	0.161	0.057	2.73133e-256	Cone	inhbb
ENSDARG00000042518~~hipk2	0	0.650422	0.991	0.927	0	Cone	hipk2	0	0.76069	0.571	0.361	0	Cone	hipk2
ENSDARG00000042529~~gnat2	7.81918e-67	0.646475	0.156	0.052	2.5428e-62	Cone	gnat2	0	2.34926	0.36	0.062	0	Cone	gnat2
ENSDARG00000043010~~camk2d1	7.13233e-283	1.52389	0.229	0.022	2.31943e-278	Cone	camk2d1	6.7309e-165	0.508927	0.061	0.014	2.18889e-160	Cone	camk2d1
ENSDARG00000043313~~ank2b	0	1.2848	0.998	0.888	0	Cone	ank2b	0	0.806322	0.898	0.651	0	Cone	ank2b
ENSDARG00000043483~~otx5	2.49201e-166	0.771452	0.377	0.122	8.10401e-162	Cone	otx5	0	0.765528	0.328	0.142	0	Cone	otx5
ENSDARG00000043497~~scrn2	4.53036e-87	0.553151	0.174	0.052	1.47327e-82	Cone	scrn2	0	0.83192	0.133	0.015	0	Cone	scrn2
ENSDARG00000043818~~CASKIN2	0	1.97367	0.875	0.195	0	Cone	CASKIN2	0	1.57287	0.268	0.008	0	Cone	CASKIN2
ENSDARG00000043847~~tmem244	1.43708e-239	0.927581	0.306	0.059	4.67339e-235	Cone	tmem244	0	1.14729	0.225	0.029	0	Cone	tmem244
ENSDARG00000044280~~opn1mw2	2.29726e-86	0.775372	0.051	0.001	7.47068e-82	Cone	opn1mw2	4.2051e-287	1.24448	0.062	0.007	1.3675e-282	Cone	opn1mw2
ENSDARG00000044345~~cyfip1	3.38609e-37	0.510152	0.319	0.229	1.10116e-32	Cone	cyfip1	3.05344e-163	0.505283	0.108	0.04	9.9298e-159	Cone	cyfip1
ENSDARG00000044362~~unc119b	0	1.77265	0.772	0.182	0	Cone	unc119b	0	1.77027	0.46	0.097	0	Cone	unc119b
ENSDARG00000044632~~myo7ab	0	1.02235	0.321	0.048	0	Cone	myo7ab	0	0.917641	0.15	0.01	0	Cone	myo7ab
ENSDARG00000044684~~rbp4l	5.31562e-222	1.24533	0.208	0.026	1.72864e-217	Cone	rbp4l	0	3.27044	0.616	0.221	0	Cone	rbp4l
ENSDARG00000044861~~opn1lw2	4.33615e-106	1.47426	0.06	0.001	1.41012e-101	Cone	opn1lw2	0	4.31759	0.446	0.207	0	Cone	opn1lw2
ENSDARG00000045519~~sfmbt2	0	1.63789	0.689	0.136	0	Cone	sfmbt2	0	0.876278	0.124	0.01	0	Cone	sfmbt2
ENSDARG00000045677~~opn1sw1	9.94154e-186	2.35637	0.122	0.006	3.23299e-181	Cone	opn1sw1	0	4.71336	0.44	0.187	0	Cone	opn1sw1
ENSDARG00000045870~~plekha5	0	2.28329	0.979	0.536	0	Cone	plekha5	0	2.43405	0.628	0.105	0	Cone	plekha5
ENSDARG00000045880~~gas2l3	2.17111e-114	0.726898	0.342	0.149	7.06044e-110	Cone	gas2l3	2.20237e-212	0.588779	0.196	0.088	7.16211e-208	Cone	gas2l3
ENSDARG00000052138~~slc1a2a	2.27661e-142	0.516439	0.096	0.005	7.40354e-138	Cone	slc1a2a	0	1.46384	0.197	0.005	0	Cone	slc1a2a
ENSDARG00000052223~~rcvrna	6.74515e-100	0.57777	0.278	0.1	2.19352e-95	Cone	rcvrna	0	1.51479	0.323	0.036	0	Cone	rcvrna
ENSDARG00000052575~~arl13a	2.01404e-222	0.78832	0.608	0.216	6.54966e-218	Cone	arl13a	0	1.30694	0.236	0.022	0	Cone	arl13a
ENSDARG00000052625~~fkbp1b	0	1.2236	0.578	0.137	0	Cone	fkbp1b	1.83048e-205	0.500795	0.101	0.03	5.95272e-201	Cone	fkbp1b
ENSDARG00000052700~~SLC9B2	0	1.79918	0.662	0.059	0	Cone	SLC9B2	0	1.71764	0.34	0.02	0	Cone	SLC9B2
ENSDARG00000053026~~kif19	0	1.39189	0.896	0.232	0	Cone	kif19	0	1.56213	0.283	0.012	0	Cone	kif19
ENSDARG00000053179~~cttnbp2nla	0	1.18829	0.342	0.037	0	Cone	cttnbp2nla	0	0.683756	0.113	0.011	0	Cone	cttnbp2nla
ENSDARG00000053279~~apln	0	3.19933	0.745	0.068	0	Cone	apln	0	1.6972	0.295	0.034	0	Cone	apln
ENSDARG00000053517~~EML5	0	1.77991	0.701	0.214	0	Cone	EML5	0	1.67566	0.652	0.181	0	Cone	EML5
ENSDARG00000053956~~sptbn2	2.32267e-116	0.640896	0.528	0.301	7.55332e-112	Cone	sptbn2	2.05024e-256	0.765945	0.327	0.185	6.66737e-252	Cone	sptbn2
ENSDARG00000054458~~slmapa	2.51065e-197	0.68841	0.75	0.523	8.16464e-193	Cone	slmapa	1.41107e-106	0.518568	0.279	0.191	4.5888e-102	Cone	slmapa
ENSDARG00000054804~~anp32e	1.05932e-111	0.641254	0.506	0.275	3.44492e-107	Cone	anp32e	8.67555e-221	0.582842	0.426	0.279	2.82129e-216	Cone	anp32e
ENSDARG00000054858~~tp53bp2b	8.41519e-172	0.843625	0.487	0.228	2.73662e-167	Cone	tp53bp2b	0	0.860119	0.206	0.056	0	Cone	tp53bp2b
ENSDARG00000055052~~map2	0	1.23176	0.894	0.656	0	Cone	map2	0	0.927347	0.249	0.09	0	Cone	map2
ENSDARG00000055099~~fam184b	3.02557e-130	0.646072	0.58	0.3	9.83917e-126	Cone	fam184b	2.19e-131	0.627007	0.178	0.095	7.12188e-127	Cone	fam184b
ENSDARG00000055284~~afap1	0	2.42852	0.99	0.473	0	Cone	afap1	6.80404e-169	0.727604	0.219	0.118	2.21268e-164	Cone	afap1
ENSDARG00000055874~~cpe	0	1.28172	0.645	0.151	0	Cone	cpe	0	0.840743	0.421	0.207	0	Cone	cpe
ENSDARG00000056036~~stxbp1b	1.01299e-238	0.839892	0.655	0.237	3.29423e-234	Cone	stxbp1b	0	1.10194	0.44	0.144	0	Cone	stxbp1b
ENSDARG00000056206~~camk2g2	3.1419e-112	0.536154	0.68	0.489	1.02174e-107	Cone	camk2g2	9.79374e-132	0.568137	0.298	0.198	3.18492e-127	Cone	camk2g2
ENSDARG00000056511~~arr3a	1.3118e-143	1.00042	0.143	0.02	4.26596e-139	Cone	arr3a	0	2.17848	0.365	0.106	0	Cone	arr3a
ENSDARG00000056805~~plch2b	3.71755e-277	0.974592	0.443	0.108	1.20895e-272	Cone	plch2b	0	0.820751	0.12	0.006	0	Cone	plch2b
ENSDARG00000057074~~rpgrb	6.33203e-211	0.861222	0.523	0.199	2.05917e-206	Cone	rpgrb	0	1.44686	0.279	0.034	0	Cone	rpgrb
ENSDARG00000057317~~nexn	1.95547e-200	0.707702	0.16	0.014	6.35919e-196	Cone	nexn	0	0.854366	0.226	0.068	0	Cone	nexn
ENSDARG00000057427~~sv2ba	0	1.18877	0.391	0.075	0	Cone	sv2ba	0	2.21593	0.38	0.038	0	Cone	sv2ba
ENSDARG00000057481~~RNF157	9.22594e-145	0.720158	0.41	0.157	3.00028e-140	Cone	RNF157	4.14099e-248	0.59168	0.267	0.128	1.34665e-243	Cone	RNF157
ENSDARG00000057527~~mef2ab	9.15476e-225	0.733574	0.162	0.011	2.97713e-220	Cone	mef2ab	0	1.75601	0.243	0.01	0	Cone	mef2ab
ENSDARG00000057921~~ccdc136b	4.6336e-202	0.878482	0.337	0.089	1.50685e-197	Cone	ccdc136b	0	0.832779	0.159	0.031	0	Cone	ccdc136b
ENSDARG00000058117~~snap25b	8.94384e-277	0.862499	0.771	0.326	2.90854e-272	Cone	snap25b	0	1.29644	0.642	0.295	0	Cone	snap25b
ENSDARG00000058154~~znf385c	0	2.83079	0.891	0.059	0	Cone	znf385c	0	0.75307	0.213	0.07	0	Cone	znf385c
ENSDARG00000058284~~CT990561.1	0	1.13099	0.895	0.687	0	Cone	CT990561.1	0	1.99672	0.418	0.051	0	Cone	CT990561.1
ENSDARG00000058354~~selenot1a	7.48364e-81	0.570455	0.345	0.166	2.43368e-76	Cone	selenot1a	0	1.23769	0.554	0.254	0	Cone	selenot1a
ENSDARG00000058820~~bin1b	0	1.26584	0.394	0.046	0	Cone	bin1b	0	0.825145	0.12	0.007	0	Cone	bin1b
ENSDARG00000059043~~ntf3	0	1.19362	0.267	0.005	0	Cone	ntf3	0	1.51296	0.221	0.017	0	Cone	ntf3
ENSDARG00000059057~~atpv0e2	3.58002e-154	0.777908	0.19	0.036	1.16422e-149	Cone	atpv0e2	0	0.791714	0.365	0.174	0	Cone	atpv0e2
ENSDARG00000059064~~rassf3	3.54357e-185	0.808455	0.491	0.199	1.15237e-180	Cone	rassf3	0	1.23208	0.197	0.009	0	Cone	rassf3
ENSDARG00000059287~~mak	4.07026e-77	0.558706	0.259	0.112	1.32365e-72	Cone	mak	0	0.837323	0.187	0.056	0	Cone	mak
ENSDARG00000059672~~arhgap36	0	1.25105	0.286	0.011	0	Cone	arhgap36	0	1.17088	0.181	0.008	0	Cone	arhgap36
ENSDARG00000059682~~slc43a3a	5.4594e-252	0.940968	0.304	0.054	1.7754e-247	Cone	slc43a3a	0	1.01884	0.169	0.008	0	Cone	slc43a3a
ENSDARG00000059801~~pdzd2	0	1.81464	0.996	0.446	0	Cone	pdzd2	0	1.58867	0.539	0.162	0	Cone	pdzd2
ENSDARG00000059906~~sdc4	2.70138e-232	0.845308	0.658	0.312	8.78487e-228	Cone	sdc4	1.90602e-131	0.524237	0.181	0.098	6.19836e-127	Cone	sdc4
ENSDARG00000059960~~plch2a	1.16546e-100	0.806348	0.226	0.078	3.79008e-96	Cone	plch2a	0	1.79946	0.325	0.055	0	Cone	plch2a
ENSDARG00000060115~~lrrn1	0	1.51463	0.943	0.43	0	Cone	lrrn1	4.96643e-143	0.52127	0.367	0.252	1.61508e-138	Cone	lrrn1
ENSDARG00000060123~~ca16b	4.76912e-185	0.656909	0.64	0.312	1.55092e-180	Cone	ca16b	0	0.647901	0.196	0.07	0	Cone	ca16b
ENSDARG00000060148~~sh3pxd2aa	0	2.98893	0.983	0.31	0	Cone	sh3pxd2aa	0	2.33294	0.464	0.043	0	Cone	sh3pxd2aa
ENSDARG00000060238~~uacab	0	2.39533	0.789	0.041	0	Cone	uacab	0	1.25038	0.266	0.055	0	Cone	uacab
ENSDARG00000060569~~tmem229b	0	1.05371	0.264	0.03	0	Cone	tmem229b	0	0.649164	0.103	0.015	0	Cone	tmem229b
ENSDARG00000060813~~plekha7a	0	1.10903	0.802	0.317	0	Cone	plekha7a	0	1.06217	0.173	0.018	0	Cone	plekha7a
ENSDARG00000061017~~spns2	0	2.14917	0.721	0.066	0	Cone	spns2	0	0.887569	0.163	0.04	0	Cone	spns2
ENSDARG00000061044~~si:dkey-72l14.3	1.59718e-277	0.951343	0.149	0.001	5.19403e-273	Cone	si:dkey-72l14.3	0	0.723732	0.085	0.003	0	Cone	si:dkey-72l14.3
ENSDARG00000061101~~snx19a	1.88785e-259	0.896394	0.235	0.027	6.13929e-255	Cone	snx19a	0	0.833903	0.114	0.004	0	Cone	snx19a
ENSDARG00000061450~~tesk2	0	2.08339	0.772	0.153	0	Cone	tesk2	1.08109e-272	0.675084	0.157	0.054	3.51572e-268	Cone	tesk2
ENSDARG00000061603~~sorbs2b	0	1.70924	0.926	0.335	0	Cone	sorbs2b	0	1.76809	0.512	0.105	0	Cone	sorbs2b
ENSDARG00000061904~~fhod3b	3.67915e-229	1.45276	0.775	0.544	1.19646e-224	Cone	fhod3b	0	1.88534	0.704	0.25	0	Cone	fhod3b
ENSDARG00000062008~~hs2st1b	6.29984e-193	0.69331	0.77	0.589	2.04871e-188	Cone	hs2st1b	8.263e-179	0.594724	0.368	0.241	2.68713e-174	Cone	hs2st1b
ENSDARG00000062220~~plekha7b	0	1.31866	0.88	0.488	0	Cone	plekha7b	5.78448e-220	0.699913	0.199	0.09	1.88111e-215	Cone	plekha7b
ENSDARG00000062251~~fbxl7	0	2.00815	0.682	0.158	0	Cone	fbxl7	0	1.22305	0.161	0.009	0	Cone	fbxl7
ENSDARG00000062330~~si:ch211-233a24.2	8.15997e-296	0.786033	0.796	0.493	2.65362e-291	Cone	si:ch211-233a24.2	2.87444e-163	0.574974	0.313	0.198	9.34767e-159	Cone	si:ch211-233a24.2
ENSDARG00000062352~~sema4ab	0	1.23355	0.549	0.177	0	Cone	sema4ab	7.53559e-135	0.584935	0.179	0.096	2.45058e-130	Cone	sema4ab
ENSDARG00000062469~~hipk3a	0	1.01199	0.701	0.322	0	Cone	hipk3a	2.73506e-114	0.540863	0.189	0.11	8.89443e-110	Cone	hipk3a
ENSDARG00000062661~~abca4b	0	1.8101	0.902	0.203	0	Cone	abca4b	0	1.89321	0.334	0.017	0	Cone	abca4b
ENSDARG00000062727~~cep290	0	1.1438	0.901	0.399	0	Cone	cep290	0	1.95522	0.448	0.091	0	Cone	cep290
ENSDARG00000062799~~baiap2a	0	1.48212	0.998	0.406	0	Cone	baiap2a	0	2.69947	0.693	0.078	0	Cone	baiap2a
ENSDARG00000062902~~si:dkey-220f10.4	3.5419e-275	0.971357	0.472	0.129	1.15183e-270	Cone	si:dkey-220f10.4	0	1.26154	0.225	0.019	0	Cone	si:dkey-220f10.4
ENSDARG00000062906~~kcnv2b	7.31879e-213	0.631759	0.116	0.001	2.38007e-208	Cone	kcnv2b	0	0.615097	0.091	0.004	0	Cone	kcnv2b
ENSDARG00000063101~~man2a2	4.41088e-265	0.926764	0.636	0.274	1.43442e-260	Cone	man2a2	0	1.02901	0.484	0.253	0	Cone	man2a2
ENSDARG00000063299~~pcloa	2.54854e-98	0.807229	0.259	0.099	8.28786e-94	Cone	pcloa	0	1.54271	0.28	0.071	0	Cone	pcloa
ENSDARG00000063309~~tjp2a	5.6437e-178	0.888412	0.237	0.049	1.83533e-173	Cone	tjp2a	2.29057e-228	0.648811	0.177	0.072	7.44893e-224	Cone	tjp2a
ENSDARG00000063310~~oxr1b	6.7357e-174	0.907838	0.364	0.122	2.19045e-169	Cone	oxr1b	0	1.10118	0.182	0.04	0	Cone	oxr1b
ENSDARG00000063701~~rreb1a	0	1.20105	0.691	0.25	0	Cone	rreb1a	0	1.18872	0.26	0.054	0	Cone	rreb1a
ENSDARG00000063730~~osbpl6	0	1.1146	0.401	0.074	0	Cone	osbpl6	0	0.611851	0.117	0.029	0	Cone	osbpl6
ENSDARG00000067676~~plcl1	8.24929e-92	0.766347	0.379	0.212	2.68267e-87	Cone	plcl1	0	1.46164	0.251	0.044	0	Cone	plcl1
ENSDARG00000067729~~arid3c	3.36294e-162	0.749006	0.179	0.031	1.09363e-157	Cone	arid3c	0	1.28883	0.2	0.018	0	Cone	arid3c
ENSDARG00000067829~~ppargc1a	8.07104e-247	0.894667	0.26	0.04	2.6247e-242	Cone	ppargc1a	0	1.42214	0.226	0.024	0	Cone	ppargc1a
ENSDARG00000068716~~cuedc1a	1.7104e-82	0.580473	0.315	0.145	5.56221e-78	Cone	cuedc1a	5.01585e-259	0.712633	0.254	0.12	1.63115e-254	Cone	cuedc1a
ENSDARG00000068981~~glceb	0	1.59893	0.673	0.173	0	Cone	glceb	0	0.916376	0.271	0.107	0	Cone	glceb
ENSDARG00000069030~~skor1a	0	1.27293	0.279	0.002	0	Cone	skor1a	0	0.57578	0.076	0.003	0	Cone	skor1a
ENSDARG00000069157~~tmem135	2.05111e-235	0.920084	0.22	0.029	6.67022e-231	Cone	tmem135	0	0.565999	0.1	0.019	0	Cone	tmem135
ENSDARG00000069356~~adgrl2a	0	3.21853	0.947	0.276	0	Cone	adgrl2a	3.27816e-94	0.57467	0.265	0.184	1.06606e-89	Cone	adgrl2a
ENSDARG00000069378~~pard6a	0	1.21648	0.845	0.278	0	Cone	pard6a	0	1.04992	0.292	0.087	0	Cone	pard6a
ENSDARG00000069600~~zgc:109889	8.68911e-76	0.58867	0.415	0.247	2.8257e-71	Cone	zgc:109889	8.68665e-111	0.51025	0.22	0.135	2.8249e-106	Cone	zgc:109889
ENSDARG00000069615~~ckmt2a	0	1.96253	0.501	0.014	0	Cone	ckmt2a	0	2.12949	0.513	0.129	0	Cone	ckmt2a
ENSDARG00000070107~~six7	0	4.10921	0.693	0.024	0	Cone	six7	0	3.31382	0.618	0.035	0	Cone	six7
ENSDARG00000070473~~parp6b	0	1.04178	0.456	0.106	0	Cone	parp6b	0	0.638263	0.117	0.025	0	Cone	parp6b
ENSDARG00000070555~~ldlrad4a	0	1.46426	0.995	0.931	0	Cone	ldlrad4a	0	1.32596	0.581	0.287	0	Cone	ldlrad4a
ENSDARG00000070601~~RASSF5	0	3.04168	0.823	0.068	0	Cone	RASSF5	0	2.65683	0.455	0.03	0	Cone	RASSF5
ENSDARG00000070654~~pex5	5.14116e-269	0.964066	0.492	0.149	1.67191e-264	Cone	pex5	7.16748e-284	0.586246	0.131	0.038	2.33086e-279	Cone	pex5
ENSDARG00000070726~~cnga3a	0	1.79034	0.48	0.012	0	Cone	cnga3a	0	2.4076	0.411	0.024	0	Cone	cnga3a
ENSDARG00000070794~~greb1	0	1.15379	0.291	0.016	0	Cone	greb1	0	0.517193	0.083	0.014	0	Cone	greb1
ENSDARG00000070809~~znf516	0	1.15793	0.989	0.633	0	Cone	znf516	0	0.930275	0.621	0.382	0	Cone	znf516
ENSDARG00000070917~~kitlga	0	1.20415	0.324	0.026	0	Cone	kitlga	2.12632e-297	0.562599	0.061	0.007	6.9148e-293	Cone	kitlga
ENSDARG00000071076~~ldhbb	5.23794e-250	0.839349	0.184	0.013	1.70338e-245	Cone	ldhbb	0	1.1592	0.194	0.013	0	Cone	ldhbb
ENSDARG00000071230~~lrfn5a	5.35429e-276	1.08367	0.607	0.262	1.74121e-271	Cone	lrfn5a	1.63555e-236	0.503154	0.199	0.082	5.31882e-232	Cone	lrfn5a
ENSDARG00000071394~~foxq2	5.814e-156	0.735462	0.093	0.002	1.89071e-151	Cone	foxq2	0	0.60255	0.075	0.01	0	Cone	foxq2
ENSDARG00000071685~~slco5a1a	4.9137e-143	0.624772	0.917	0.8	1.59793e-138	Cone	slco5a1a	4.19324e-209	0.638409	0.303	0.166	1.36364e-204	Cone	slco5a1a
ENSDARG00000074119~~frmpd2	1.0686e-194	0.556412	0.115	0.003	3.47508e-190	Cone	frmpd2	0	1.4656	0.202	0.002	0	Cone	frmpd2
ENSDARG00000074121~~dnmbp	0	1.08281	0.949	0.578	0	Cone	dnmbp	0	1.25064	0.414	0.139	0	Cone	dnmbp
ENSDARG00000074244~~arhgef10lb	0	1.27722	0.831	0.362	0	Cone	arhgef10lb	0	1.20471	0.184	0.026	0	Cone	arhgef10lb
ENSDARG00000074248~~tmem237b	2.74363e-280	1.02854	0.291	0.045	8.9223e-276	Cone	tmem237b	0	0.908315	0.214	0.061	0	Cone	tmem237b
ENSDARG00000074319~~sall1a	0	2.5309	0.874	0.059	0	Cone	sall1a	0	1.91292	0.418	0.033	0	Cone	sall1a
ENSDARG00000074396~~fscn2b	4.023e-94	0.51499	0.374	0.155	1.30828e-89	Cone	fscn2b	0	1.02274	0.155	0.015	0	Cone	fscn2b
ENSDARG00000074414~~sema4ba	0	1.40197	0.694	0.206	0	Cone	sema4ba	0	1.25768	0.306	0.082	0	Cone	sema4ba
ENSDARG00000074508~~si:dkey-28e7.3	0	1.68946	0.667	0.114	0	Cone	si:dkey-28e7.3	0	1.0832	0.154	0.008	0	Cone	si:dkey-28e7.3
ENSDARG00000074715~~stk17a	1.09286e-234	0.97833	0.481	0.186	3.55398e-230	Cone	stk17a	7.05674e-222	0.580977	0.161	0.063	2.29485e-217	Cone	stk17a
ENSDARG00000074760~~ttc7a	2.06038e-159	0.733518	0.244	0.056	6.70037e-155	Cone	ttc7a	0	1.10543	0.157	0.007	0	Cone	ttc7a
ENSDARG00000074839~~impg1b	0	2.37109	0.935	0.243	0	Cone	impg1b	0	2.1877	0.39	0.01	0	Cone	impg1b
ENSDARG00000074892~~pde6d	1.26931e-109	0.605222	0.314	0.117	4.12779e-105	Cone	pde6d	0	0.868869	0.214	0.06	0	Cone	pde6d
ENSDARG00000074905~~camk1da	0	2.71802	0.604	0.028	0	Cone	camk1da	0	2.39901	0.355	0.025	0	Cone	camk1da
ENSDARG00000075054~~rasgrf2a	3.9575e-284	1.00565	0.33	0.057	1.28698e-279	Cone	rasgrf2a	0	1.26695	0.284	0.04	0	Cone	rasgrf2a
ENSDARG00000075110~~dab2ipb	7.87809e-11	0.542084	0.464	0.505	2.56196e-06	Cone	dab2ipb	1.97103e-229	0.858924	0.172	0.071	6.40979e-225	Cone	dab2ipb
ENSDARG00000075169~~bbs1	7.91004e-72	0.520239	0.179	0.062	2.57235e-67	Cone	bbs1	0	0.512199	0.084	0.014	0	Cone	bbs1
ENSDARG00000075295~~tulp1a	0	2.02421	0.699	0.12	0	Cone	tulp1a	0	2.75815	0.615	0.068	0	Cone	tulp1a
ENSDARG00000075362~~whrna	0	1.99108	0.982	0.28	0	Cone	whrna	0	1.94319	0.439	0.039	0	Cone	whrna
ENSDARG00000075459~~ptpn20	0	1.26764	0.341	0.019	0	Cone	ptpn20	0	0.543025	0.07	0.002	0	Cone	ptpn20
ENSDARG00000075752~~myo18aa	0	1.56765	0.645	0.149	0	Cone	myo18aa	1.98292e-286	0.661486	0.138	0.041	6.44846e-282	Cone	myo18aa
ENSDARG00000075964~~plekhg4	0	1.60899	0.785	0.211	0	Cone	plekhg4	1.3141e-255	0.703808	0.209	0.09	4.27344e-251	Cone	plekhg4
ENSDARG00000076001~~pip5k1ca	7.66093e-165	0.810948	0.323	0.102	2.49133e-160	Cone	pip5k1ca	0	0.917461	0.196	0.043	0	Cone	pip5k1ca
ENSDARG00000076014~~ERC1	7.90041e-87	0.583741	0.521	0.382	2.56921e-82	Cone	ERC1	2.23507e-138	0.52835	0.149	0.072	7.26846e-134	Cone	ERC1
ENSDARG00000076040~~arl15a	1.20615e-193	0.871223	0.369	0.107	3.92239e-189	Cone	arl15a	0	1.23044	0.189	0.02	0	Cone	arl15a
ENSDARG00000076055~~rpgrip1	1.00218e-256	0.907379	0.5	0.141	3.25909e-252	Cone	rpgrip1	0	1.43227	0.266	0.015	0	Cone	rpgrip1
ENSDARG00000076135~~mmrn2a	0	2.02625	0.589	0.018	0	Cone	mmrn2a	0	1.72018	0.292	0.022	0	Cone	mmrn2a
ENSDARG00000076371~~SHROOM2	0	1.09532	0.286	0.033	0	Cone	SHROOM2	0	0.654002	0.098	0.008	0	Cone	SHROOM2
ENSDARG00000076639~~esamb	0	1.5046	0.241	0.015	0	Cone	esamb	0	1.47641	0.221	0.026	0	Cone	esamb
ENSDARG00000076689~~gramd1a	6.47882e-257	0.804018	0.743	0.454	2.10691e-252	Cone	gramd1a	1.0132e-260	0.723392	0.298	0.157	3.29492e-256	Cone	gramd1a
ENSDARG00000076697~~SIPA1	7.08755e-280	0.950897	0.615	0.228	2.30487e-275	Cone	SIPA1	8.67049e-169	0.624178	0.212	0.112	2.81964e-164	Cone	SIPA1
ENSDARG00000076729~~myo9aa	0	1.46332	0.977	0.652	0	Cone	myo9aa	0	1.9549	0.521	0.094	0	Cone	myo9aa
ENSDARG00000076997~~stxbp4	2.80394e-209	0.886706	0.308	0.07	9.11841e-205	Cone	stxbp4	0	0.850983	0.144	0.022	0	Cone	stxbp4
ENSDARG00000077072~~si:ch73-280o22.2	0	1.06917	0.771	0.391	0	Cone	si:ch73-280o22.2	0	0.815508	0.191	0.067	0	Cone	si:ch73-280o22.2
ENSDARG00000077187~~impg1a	4.01396e-162	0.518165	0.086	0	1.30534e-157	Cone	impg1a	0	0.557151	0.068	0.002	0	Cone	impg1a
ENSDARG00000077249~~gmip	0	1.58763	0.41	0.016	0	Cone	gmip	0	1.13165	0.174	0.004	0	Cone	gmip
ENSDARG00000077367~~ntng2a	0	1.65308	0.353	0.045	0	Cone	ntng2a	0	1.7671	0.252	0.042	0	Cone	ntng2a
ENSDARG00000077506~~tjp1a	0	2.05882	0.928	0.482	0	Cone	tjp1a	0	1.67287	0.632	0.219	0	Cone	tjp1a
ENSDARG00000077881~~chl1a	5.43697e-55	0.788464	0.475	0.309	1.7681e-50	Cone	chl1a	0	2.57215	0.323	0.042	0	Cone	chl1a
ENSDARG00000077948~~usp54a	9.47763e-170	0.642818	0.76	0.527	3.08212e-165	Cone	usp54a	4.89183e-136	0.516728	0.285	0.181	1.59082e-131	Cone	usp54a
ENSDARG00000078102~~psda	3.89626e-65	0.537289	0.336	0.185	1.26706e-60	Cone	psda	0	1.24552	0.187	0.009	0	Cone	psda
ENSDARG00000078226~~cdh12a	0	2.27452	0.947	0.224	0	Cone	cdh12a	0	1.72114	0.325	0.028	0	Cone	cdh12a
ENSDARG00000078671~~cdk5r2b	1.76339e-116	0.577902	0.11	0.013	5.73453e-112	Cone	cdk5r2b	0	0.73657	0.103	0.005	0	Cone	cdk5r2b
ENSDARG00000079027~~chsy1	0	1.92047	0.968	0.685	0	Cone	chsy1	0	1.32168	0.579	0.301	0	Cone	chsy1
ENSDARG00000079217~~bbs9	0	0.945117	0.75	0.286	0	Cone	bbs9	0	1.28006	0.286	0.051	0	Cone	bbs9
ENSDARG00000079374~~tjp1b	0	1.253	0.988	0.571	0	Cone	tjp1b	0	2.18999	0.674	0.203	0	Cone	tjp1b
ENSDARG00000079397~~cerkl	0	1.29097	0.942	0.281	0	Cone	cerkl	0	2.14014	0.528	0.078	0	Cone	cerkl
ENSDARG00000079519~~eys	0	2.31879	0.723	0.027	0	Cone	eys	0	1.32782	0.196	0.005	0	Cone	eys
ENSDARG00000079779~~radil	0	1.6184	0.694	0.103	0	Cone	radil	0	1.28782	0.22	0.009	0	Cone	radil
ENSDARG00000079849~~nrtn	1.13847e-239	0.700753	0.128	0.001	3.70232e-235	Cone	nrtn	0	0.904787	0.106	0.002	0	Cone	nrtn
ENSDARG00000079985~~nrip2	5.58967e-73	0.584557	0.238	0.102	1.81776e-68	Cone	nrip2	0	0.826907	0.128	0.028	0	Cone	nrip2
ENSDARG00000079994~~akap13	0	1.59715	0.989	0.659	0	Cone	akap13	0	1.39782	0.3	0.076	0	Cone	akap13
ENSDARG00000086300~~FAM107A	6.4503e-154	0.518442	0.1	0.005	2.09764e-149	Cone	FAM107A	0	0.680613	0.095	0.008	0	Cone	FAM107A
ENSDARG00000087110~~akna	0	1.96087	0.873	0.146	0	Cone	akna	0	1.14896	0.211	0.025	0	Cone	akna
ENSDARG00000087599~~ENSDARG00000087599	0	2.75895	0.68	0.153	0	Cone	ENSDARG00000087599	3.63021e-257	1.02236	0.165	0.062	1.18055e-252	Cone	ENSDARG00000087599
ENSDARG00000087780~~tiam2a	0	1.07033	0.753	0.332	0	Cone	tiam2a	0	0.790098	0.266	0.118	0	Cone	tiam2a
ENSDARG00000088168~~ablim3	5.34446e-269	1.19751	0.482	0.152	1.73802e-264	Cone	ablim3	0	1.83109	0.299	0.028	0	Cone	ablim3
ENSDARG00000088293~~doc2b	0	2.43084	0.792	0.12	0	Cone	doc2b	0	1.29971	0.337	0.066	0	Cone	doc2b
ENSDARG00000088900~~si:dkey-21o19.2	0	1.64561	0.528	0.039	0	Cone	si:dkey-21o19.2	0	1.19377	0.195	0.009	0	Cone	si:dkey-21o19.2
ENSDARG00000089063~~lactbl1a	5.04399e-184	0.557073	0.1	0.001	1.64031e-179	Cone	lactbl1a	0	0.774715	0.174	0.04	0	Cone	lactbl1a
ENSDARG00000089326~~arhgap20	9.10669e-134	0.673921	0.428	0.168	2.9615e-129	Cone	arhgap20	0	1.12175	0.227	0.031	0	Cone	arhgap20
ENSDARG00000089458~~rp1l1a	0	1.19852	0.645	0.161	0	Cone	rp1l1a	0	1.54344	0.273	0.013	0	Cone	rp1l1a
ENSDARG00000089643~~mcama	0	2.34024	0.784	0.121	0	Cone	mcama	0	1.69641	0.319	0.034	0	Cone	mcama
ENSDARG00000089858~~cobll1a	6.7579e-142	0.569501	0.131	0.015	2.19767e-137	Cone	cobll1a	0	0.804324	0.108	0.004	0	Cone	cobll1a
ENSDARG00000090126~~si:ch211-105f12.2	6.4388e-156	0.687127	0.18	0.03	2.0939e-151	Cone	si:ch211-105f12.2	0	0.700526	0.106	0.003	0	Cone	si:ch211-105f12.2
ENSDARG00000090230~~tmem108	0	1.99694	0.981	0.438	0	Cone	tmem108	0	0.758653	0.532	0.333	0	Cone	tmem108
ENSDARG00000090496~~thsd7ab	0	2.35479	0.638	0.132	0	Cone	thsd7ab	0	1.37703	0.308	0.069	0	Cone	thsd7ab
ENSDARG00000090543~~tmem138	1.7742e-146	0.731262	0.209	0.046	5.76971e-142	Cone	tmem138	1.32652e-305	0.579737	0.104	0.023	4.31386e-301	Cone	tmem138
ENSDARG00000090963~~atp6ap1lb	0	1.34303	0.396	0.051	0	Cone	atp6ap1lb	0	1.22355	0.245	0.05	0	Cone	atp6ap1lb
ENSDARG00000091128~~lrrc75bb	2.27347e-157	0.726685	0.211	0.044	7.39332e-153	Cone	lrrc75bb	0	1.04223	0.162	0.021	0	Cone	lrrc75bb
ENSDARG00000091293~~dmxl2	0	1.35243	0.545	0.194	0	Cone	dmxl2	4.18282e-117	0.512019	0.221	0.132	1.36025e-112	Cone	dmxl2
ENSDARG00000091834~~si:ch211-198m17.1	1.24537e-279	1.00629	0.463	0.119	4.04994e-275	Cone	si:ch211-198m17.1	0	0.740565	0.101	0.008	0	Cone	si:ch211-198m17.1
ENSDARG00000093851~~CU639468.1	0	2.58369	0.297	0.036	0	Cone	CU639468.1	0	1.75167	0.214	0.048	0	Cone	CU639468.1
ENSDARG00000094577~~cdc42se2	3.65235e-171	0.933787	0.373	0.145	1.18774e-166	Cone	cdc42se2	0	0.740348	0.12	0.023	0	Cone	cdc42se2
ENSDARG00000095603~~grid2ipb	0	1.16074	0.525	0.135	0	Cone	grid2ipb	0	1.04683	0.155	0.008	0	Cone	grid2ipb
ENSDARG00000095802~~pcare2	1.66832e-94	0.524281	0.098	0.014	5.42538e-90	Cone	pcare2	0	0.775319	0.116	0.007	0	Cone	pcare2
ENSDARG00000095831~~si:ch211-175f12.2	0	1.05999	0.29	0.03	0	Cone	si:ch211-175f12.2	0	0.669608	0.1	0.005	0	Cone	si:ch211-175f12.2
ENSDARG00000096367~~fnbp1b	0	0.796142	0.846	0.579	0	Cone	fnbp1b	0	1.246	0.304	0.09	0	Cone	fnbp1b
ENSDARG00000096398~~si:ch211-276a17.5	0	1.21212	0.28	0.007	0	Cone	si:ch211-276a17.5	0	0.829813	0.125	0.003	0	Cone	si:ch211-276a17.5
ENSDARG00000096701~~si:dkey-21e13.3	1.95921e-131	0.538954	0.117	0.012	6.37135e-127	Cone	si:dkey-21e13.3	0	0.681361	0.104	0.008	0	Cone	si:dkey-21e13.3
ENSDARG00000097240~~BX323076.1	1.98595e-100	0.61499	0.153	0.036	6.45831e-96	Cone	BX323076.1	0	0.816701	0.17	0.042	0	Cone	BX323076.1
ENSDARG00000097369~~FP017274.1	6.99872e-119	0.604528	0.261	0.078	2.27598e-114	Cone	FP017274.1	0	0.772754	0.339	0.153	0	Cone	FP017274.1
ENSDARG00000098164~~aipl2	0	1.23537	0.383	0.054	0	Cone	aipl2	0	1.57123	0.26	0.013	0	Cone	aipl2
ENSDARG00000098257~~pcdh15a	0	1.44286	0.353	0.051	0	Cone	pcdh15a	5.65793e-221	0.9599	0.163	0.066	1.83996e-216	Cone	pcdh15a
ENSDARG00000098392~~ly6pge	0	4.49483	0.972	0.077	0	Cone	ly6pge	0	3.23765	0.694	0.11	0	Cone	ly6pge
ENSDARG00000098623~~si:dkey-23f9.4	4.53775e-125	0.689286	0.252	0.079	1.47568e-120	Cone	si:dkey-23f9.4	0	0.962685	0.185	0.046	0	Cone	si:dkey-23f9.4
ENSDARG00000098652~~pcdh11	0	2.68923	0.572	0.162	0	Cone	pcdh11	6.1521e-145	0.539744	0.302	0.187	2.00066e-140	Cone	pcdh11
ENSDARG00000098925~~prdm1b	0	1.43609	0.919	0.397	0	Cone	prdm1b	0	1.3023	0.38	0.106	0	Cone	prdm1b
ENSDARG00000099008~~EGFLAM	0	1.57286	0.594	0.067	0	Cone	EGFLAM	0	1.39649	0.253	0.008	0	Cone	EGFLAM
ENSDARG00000099149~~hs3st3b1a	0	1.60578	0.449	0.025	0	Cone	hs3st3b1a	0	1.85967	0.222	0.009	0	Cone	hs3st3b1a
ENSDARG00000099221~~ppp2r2bb	0	2.447	0.756	0.165	0	Cone	ppp2r2bb	0	1.00174	0.311	0.134	0	Cone	ppp2r2bb
ENSDARG00000099227~~galnt13	0	1.60105	0.471	0.043	0	Cone	galnt13	0	1.71181	0.315	0.021	0	Cone	galnt13
ENSDARG00000099566~~lmbrd2a	6.77154e-245	0.947246	0.308	0.064	2.2021e-240	Cone	lmbrd2a	4.63615e-305	0.626625	0.109	0.025	1.50768e-300	Cone	lmbrd2a
ENSDARG00000099758~~igf2bp2b	3.03228e-287	1.1193	0.488	0.157	9.86096e-283	Cone	igf2bp2b	0	1.17784	0.242	0.058	0	Cone	igf2bp2b
ENSDARG00000099871~~myo7aa	7.69908e-53	0.726959	0.416	0.312	2.50374e-48	Cone	myo7aa	0	0.509787	0.074	0.01	0	Cone	myo7aa
ENSDARG00000099933~~ppa1a	2.76384e-178	0.515977	0.103	0.002	8.98801e-174	Cone	ppa1a	0	0.664855	0.09	0.005	0	Cone	ppa1a
ENSDARG00000100506~~crb1	0	2.32045	0.626	0.024	0	Cone	crb1	0	0.694097	0.126	0.026	0	Cone	crb1
ENSDARG00000100876~~sez6a	0	2.19449	0.886	0.122	0	Cone	sez6a	0	1.92612	0.41	0.031	0	Cone	sez6a
ENSDARG00000101028~~fnbp1b	0	0.875805	0.831	0.558	0	Cone	fnbp1b	0	0.765307	0.269	0.12	0	Cone	fnbp1b
ENSDARG00000101225~~cngb3.1	0	1.10617	0.236	0.003	0	Cone	cngb3.1	0	0.984723	0.129	0.005	0	Cone	cngb3.1
ENSDARG00000101348~~plppr5b	2.42916e-246	1.10471	0.283	0.054	7.89964e-242	Cone	plppr5b	0	0.715295	0.093	0.01	0	Cone	plppr5b
ENSDARG00000101363~~ano2b	0	1.68238	0.366	0.014	0	Cone	ano2b	0	1.48123	0.214	0.01	0	Cone	ano2b
ENSDARG00000101368~~cngb3.2	0	2.1245	0.535	0.005	0	Cone	cngb3.2	0	2.56413	0.386	0.013	0	Cone	cngb3.2
ENSDARG00000101441~~lima1a	5.19052e-136	0.766115	0.407	0.171	1.68796e-131	Cone	lima1a	4.22213e-206	0.653544	0.176	0.076	1.37304e-201	Cone	lima1a
ENSDARG00000101569~~ppargc1b	0	1.21981	0.667	0.298	0	Cone	ppargc1b	0	0.826695	0.286	0.13	0	Cone	ppargc1b
ENSDARG00000101624~~lmnb2	1.79706e-76	0.539304	0.507	0.342	5.84405e-72	Cone	lmnb2	3.854e-105	0.518605	0.298	0.212	1.25332e-100	Cone	lmnb2
ENSDARG00000101644~~ARHGEF17	6.86357e-205	0.973371	0.369	0.116	2.23203e-200	Cone	ARHGEF17	0	0.64115	0.112	0.017	0	Cone	ARHGEF17
ENSDARG00000101752~~plekhg5b	0	2.43969	0.956	0.248	0	Cone	plekhg5b	0	1.73151	0.363	0.04	0	Cone	plekhg5b
ENSDARG00000101868~~dennd1b	5.48758e-207	0.860652	0.567	0.303	1.78456e-202	Cone	dennd1b	5.25735e-155	0.558828	0.139	0.061	1.70969e-150	Cone	dennd1b
ENSDARG00000101869~~MAGI3	0	1.88417	0.984	0.487	0	Cone	MAGI3	0	2.17135	0.479	0.103	0	Cone	MAGI3
ENSDARG00000102204~~jph3	3.27809e-293	1.14479	0.372	0.085	1.06604e-288	Cone	jph3	0	1.11565	0.223	0.067	0	Cone	jph3
ENSDARG00000102288~~CABZ01056321.1	3.90434e-165	0.734617	0.222	0.045	1.26969e-160	Cone	CABZ01056321.1	0	1.485	0.244	0.015	0	Cone	CABZ01056321.1
ENSDARG00000102430~~opn6a	0	2.01009	0.619	0.025	0	Cone	opn6a	0	1.82401	0.358	0.021	0	Cone	opn6a
ENSDARG00000102470~~mpp7a	7.35802e-194	0.726935	0.763	0.576	2.39283e-189	Cone	mpp7a	0	0.95167	0.235	0.066	0	Cone	mpp7a
ENSDARG00000102506~~lrp2a	0	1.31077	0.987	0.592	0	Cone	lrp2a	0	2.52032	0.592	0.049	0	Cone	lrp2a
ENSDARG00000102690~~rims2b	4.95181e-42	0.546325	0.445	0.374	1.61033e-37	Cone	rims2b	0	1.97238	0.378	0.102	0	Cone	rims2b
ENSDARG00000102755~~EML6	9.57976e-217	0.901101	0.345	0.089	3.11534e-212	Cone	EML6	2.87115e-197	0.590549	0.182	0.082	9.33698e-193	Cone	EML6
ENSDARG00000102759~~TMEM132D	5.33482e-278	0.854851	0.2	0.013	1.73488e-273	Cone	TMEM132D	1.74047e-231	0.547972	0.091	0.023	5.65999e-227	Cone	TMEM132D
ENSDARG00000102769~~CDH18	0	1.91247	0.455	0.113	0	Cone	CDH18	0	0.807206	0.118	0.027	0	Cone	CDH18
ENSDARG00000102967~~CT573282.1	2.30819e-150	0.54403	0.078	0	7.50622e-146	Cone	CT573282.1	0	1.54181	0.13	0.002	0	Cone	CT573282.1
ENSDARG00000103002~~nptna	0	1.8847	0.84	0.181	0	Cone	nptna	0	1.52206	0.472	0.115	0	Cone	nptna
ENSDARG00000103109~~chl1b	9.11065e-42	0.994064	0.421	0.357	2.96278e-37	Cone	chl1b	0	1.63675	0.199	0.015	0	Cone	chl1b
ENSDARG00000103543~~gngt2b	1.11731e-148	0.71454	0.156	0.022	3.63349e-144	Cone	gngt2b	0	2.23993	0.549	0.282	0	Cone	gngt2b
ENSDARG00000103743~~si:dkeyp-72e1.9	0	1.96276	0.652	0.059	0	Cone	si:dkeyp-72e1.9	3.24617e-206	0.595613	0.13	0.046	1.05566e-201	Cone	si:dkeyp-72e1.9
ENSDARG00000103774~~limch1b	2.13971e-64	0.772659	0.259	0.131	6.95834e-60	Cone	limch1b	0	1.4212	0.197	0.021	0	Cone	limch1b
ENSDARG00000104028~~si:dkey-74k8.3	1.04019e-203	0.732216	0.166	0.015	3.38269e-199	Cone	si:dkey-74k8.3	0	0.806855	0.157	0.041	0	Cone	si:dkey-74k8.3
ENSDARG00000104034~~arid3b	1.70053e-96	0.574727	0.593	0.43	5.53011e-92	Cone	arid3b	0	1.49633	0.594	0.243	0	Cone	arid3b
ENSDARG00000104139~~atp1a3b	4.18919e-274	0.684902	0.802	0.284	1.36233e-269	Cone	atp1a3b	0	0.622576	0.124	0.031	0	Cone	atp1a3b
ENSDARG00000104204~~slc1a8a	0	2.62001	0.561	0.003	0	Cone	slc1a8a	0	2.81813	0.45	0.007	0	Cone	slc1a8a
ENSDARG00000104223~~lmbrd1	7.29258e-128	0.671038	0.564	0.349	2.37155e-123	Cone	lmbrd1	4.6386e-117	0.569649	0.265	0.173	1.50847e-112	Cone	lmbrd1
ENSDARG00000104435~~si:ch73-217b7.1	0	1.23337	0.467	0.102	0	Cone	si:ch73-217b7.1	0	1.01464	0.266	0.064	0	Cone	si:ch73-217b7.1
ENSDARG00000104458~~rnasekb	5.57308e-67	0.602105	0.228	0.101	1.81237e-62	Cone	rnasekb	2.40338e-179	0.549627	0.486	0.353	7.81578e-175	Cone	rnasekb
ENSDARG00000104980~~PPEF2	0	2.03673	0.618	0.043	0	Cone	PPEF2	0	1.99954	0.313	0.005	0	Cone	PPEF2
ENSDARG00000105081~~BX548246.1	2.31156e-227	0.94303	0.293	0.059	7.5172e-223	Cone	BX548246.1	0	0.976238	0.284	0.085	0	Cone	BX548246.1
ENSDARG00000105136~~ccdc50	0	1.42041	0.802	0.251	0	Cone	ccdc50	0	1.26411	0.292	0.065	0	Cone	ccdc50
ENSDARG00000105285~~FAT4	1.14178e-85	0.692878	0.345	0.177	3.71307e-81	Cone	FAT4	1.79341e-296	0.761119	0.16	0.053	5.83217e-292	Cone	FAT4
ENSDARG00000106248~~LRFN2	0	1.68143	0.463	0.06	0	Cone	LRFN2	0	2.42334	0.518	0.053	0	Cone	LRFN2
ENSDARG00000110877~~FO834855.1	0	1.18602	0.246	0.001	0	Cone	FO834855.1	0	0.957273	0.12	0.003	0	Cone	FO834855.1
ENSDARG00000111106~~arl3l1	0	1.12971	0.372	0.06	0	Cone	arl3l1	0	1.89138	0.392	0.043	0	Cone	arl3l1
ENSDARG00000112690~~CR931802.4	0	1.02669	0.297	0.039	0	Cone	CR931802.4	3.70389e-197	0.542776	0.105	0.034	1.2045e-192	Cone	CR931802.4
ENSDARG00000113761~~DYNC2H1	1.94412e-133	0.724536	0.425	0.195	6.32227e-129	Cone	DYNC2H1	0	0.988979	0.235	0.062	0	Cone	DYNC2H1
ENSDARG00000114704~~KCTD20	0	1.14927	0.295	0.021	0	Cone	KCTD20	0	1.40852	0.237	0.01	0	Cone	KCTD20
ENSDARG00000114823~~PLXNA1	0	1.97782	0.916	0.237	0	Cone	PLXNA1	0	1.17015	0.541	0.268	0	Cone	PLXNA1
ENSDARG00000116732~~CABZ01031870.1	2.05148e-173	0.800843	0.381	0.127	6.6714e-169	Cone	CABZ01031870.1	0	0.905879	0.142	0.008	0	Cone	CABZ01031870.1
ENSDARG00000117385~~CABZ01031868.1	1.05347e-208	0.84732	0.482	0.172	3.42589e-204	Cone	CABZ01031868.1	0	0.836681	0.128	0.007	0	Cone	CABZ01031868.1
ENSDARG00000117643~~CU896641.1	7.76283e-231	0.78478	0.161	0.01	2.52447e-226	Cone	CU896641.1	0	1.2315	0.18	0.001	0	Cone	CU896641.1
ENSDARG00000117660~~CU459145.1	0	1.50485	0.368	0.006	0	Cone	CU459145.1	0	0.681168	0.095	0.004	0	Cone	CU459145.1
ENSDARG00000000503~~stx1b	0	1.81322	0.73	0.139	0	AC	stx1b	0	0.972083	0.429	0.171	0	AC	stx1b
ENSDARG00000001994~~stxbp1a	2.60714e-250	1.62659	0.544	0.094	8.47842e-246	AC	stxbp1a	0	1.36997	0.377	0.073	0	AC	stxbp1a
ENSDARG00000002131~~celf2	2.79688e-146	0.830486	0.987	0.899	9.09544e-142	AC	celf2	9.67132e-293	0.623876	0.735	0.505	3.14511e-288	AC	celf2
ENSDARG00000002587~~dpysl3	1.49938e-23	0.630085	0.209	0.086	4.87597e-19	AC	dpysl3	6.87595e-281	0.677759	0.21	0.073	2.23606e-276	AC	dpysl3
ENSDARG00000002607~~unm-sa1614	1.34305e-271	1.77967	0.755	0.175	4.3676e-267	AC	unm-sa1614	0	0.921228	0.34	0.113	0	AC	unm-sa1614
ENSDARG00000003326~~cacng5a	0	2.00006	0.418	0.003	0	AC	cacng5a	0	0.750708	0.097	0.007	0	AC	cacng5a
ENSDARG00000003655~~tmem59l	1.19322e-51	0.805521	0.175	0.039	3.88036e-47	AC	tmem59l	0	0.810957	0.235	0.065	0	AC	tmem59l
ENSDARG00000003963~~traf4a	3.7639e-108	1.31178	0.684	0.309	1.22402e-103	AC	traf4a	0	1.08011	0.435	0.222	0	AC	traf4a
ENSDARG00000004218~~rnd1b	0	1.81992	0.508	0.053	0	AC	rnd1b	0	0.889145	0.16	0.039	0	AC	rnd1b
ENSDARG00000004227~~pde3a	2.76278e-32	0.632202	0.384	0.178	8.98456e-28	AC	pde3a	3.29193e-275	0.739544	0.152	0.043	1.07054e-270	AC	pde3a
ENSDARG00000004305~~vangl1	3.10236e-183	1.40525	0.409	0.068	1.00889e-178	AC	vangl1	2.87718e-192	0.563404	0.172	0.065	9.35658e-188	AC	vangl1
ENSDARG00000004588~~sox4a	1.79306e-40	0.757744	0.432	0.198	5.83101e-36	AC	sox4a	0	0.785434	0.315	0.123	0	AC	sox4a
ENSDARG00000004988~~ppp3ca	2.30944e-185	1.19054	0.441	0.066	7.51029e-181	AC	ppp3ca	0	0.771993	0.254	0.08	0	AC	ppp3ca
ENSDARG00000005141~~camkvb	1.45926e-204	1.04078	0.175	0.008	4.74552e-200	AC	camkvb	3.87105e-224	0.853936	0.065	0.01	1.25887e-219	AC	camkvb
ENSDARG00000005159~~cyth1a	1.37187e-220	1.44923	0.498	0.081	4.46131e-216	AC	cyth1a	0	0.819344	0.162	0.037	0	AC	cyth1a
ENSDARG00000005479~~tenm3	2.60343e-46	0.67907	0.494	0.245	8.46635e-42	AC	tenm3	0	1.44092	0.442	0.128	0	AC	tenm3
ENSDARG00000005783~~ncanb	0	2.47518	0.69	0.032	0	AC	ncanb	0	1.58088	0.314	0.048	0	AC	ncanb
ENSDARG00000006301~~RAPH1	1.19175e-127	1.11842	0.8	0.371	3.87557e-123	AC	RAPH1	0	1.0377	0.484	0.196	0	AC	RAPH1
ENSDARG00000006760~~slc24a3	4.98005e-64	1.07608	0.335	0.113	1.61951e-59	AC	slc24a3	6.05353e-159	0.539632	0.134	0.048	1.96861e-154	AC	slc24a3
ENSDARG00000006849~~asic2	4.9438e-38	1.1516	0.401	0.196	1.60772e-33	AC	asic2	2.33382e-183	1.06084	0.126	0.042	7.58958e-179	AC	asic2
ENSDARG00000007171~~aig1	2.16126e-184	1.41544	0.487	0.096	7.02843e-180	AC	aig1	1.96835e-238	0.526979	0.123	0.032	6.40108e-234	AC	aig1
ENSDARG00000007172~~plxna3	1.94835e-188	1.1926	0.981	0.65	6.33602e-184	AC	plxna3	0	0.986057	0.695	0.465	0	AC	plxna3
ENSDARG00000007678~~ttyh3b	1.69011e-92	0.783609	0.913	0.642	5.49623e-88	AC	ttyh3b	4.68271e-224	0.605842	0.554	0.361	1.52282e-219	AC	ttyh3b
ENSDARG00000007818~~palm1b	6.8694e-66	1.01215	0.331	0.105	2.23393e-61	AC	palm1b	4.97712e-175	0.622248	0.191	0.082	1.61856e-170	AC	palm1b
ENSDARG00000008107~~src	7.58477e-56	0.973392	0.325	0.115	2.46657e-51	AC	src	0	0.847578	0.216	0.053	0	AC	src
ENSDARG00000008140~~kcnab1a	0	2.42924	0.487	0.009	0	AC	kcnab1a	0	0.642405	0.06	0.004	0	AC	kcnab1a
ENSDARG00000008209~~myt1la	0	1.84722	0.612	0.082	0	AC	myt1la	0	1.10222	0.214	0.038	0	AC	myt1la
ENSDARG00000009031~~tnikb	1.73747e-112	0.949197	0.804	0.518	5.65024e-108	AC	tnikb	1.48724e-145	0.555399	0.356	0.218	4.8365e-141	AC	tnikb
ENSDARG00000009733~~kif21b	7.62728e-211	1.47905	0.916	0.423	2.48039e-206	AC	kif21b	0	1.6689	0.487	0.148	0	AC	kif21b
ENSDARG00000010144~~plppr3a	7.70952e-132	1.28568	0.641	0.25	2.50714e-127	AC	plppr3a	6.23735e-289	0.799737	0.362	0.177	2.02839e-284	AC	plppr3a
ENSDARG00000011066~~glra3	1.39359e-172	1.2497	0.255	0.025	4.53194e-168	AC	glra3	3.40266e-52	0.560337	0.08	0.039	1.10654e-47	AC	glra3
ENSDARG00000011141~~dpysl5a	3.39488e-11	0.543132	0.316	0.235	1.10402e-06	AC	dpysl5a	1.37051e-207	0.590339	0.191	0.074	4.4569e-203	AC	dpysl5a
ENSDARG00000011170~~ndrg2	1.07579e-241	1.69808	0.793	0.253	3.49845e-237	AC	ndrg2	5.36601e-146	0.586056	0.264	0.14	1.74503e-141	AC	ndrg2
ENSDARG00000011602~~CRACD	2.37e-33	0.78946	0.226	0.083	7.70723e-29	AC	CRACD	1.88478e-199	0.530578	0.129	0.04	6.12932e-195	AC	CRACD
ENSDARG00000012019~~glra1	2.371e-94	1.85193	0.487	0.193	7.7105e-90	AC	glra1	1.99484e-280	0.867812	0.108	0.023	6.48721e-276	AC	glra1
ENSDARG00000012204~~CDK18	4.01225e-203	1.8018	0.914	0.514	1.30478e-198	AC	CDK18	0	1.63574	0.263	0.016	0	AC	CDK18
ENSDARG00000012667~~tfap2b	3.5496e-178	0.852772	0.135	0.004	1.15433e-173	AC	tfap2b	0	1.75312	0.315	0.023	0	AC	tfap2b
ENSDARG00000012833~~foxn3	5.92228e-126	1.26066	0.705	0.337	1.92592e-121	AC	foxn3	1.9344e-212	1.2117	0.368	0.215	6.29067e-208	AC	foxn3
ENSDARG00000013000~~ppfia2	5.73522e-32	0.671063	0.411	0.214	1.8651e-27	AC	ppfia2	1.81151e-106	0.543154	0.292	0.177	5.89103e-102	AC	ppfia2
ENSDARG00000014280~~dlgap1a	8.56141e-119	1.24403	0.511	0.147	2.78417e-114	AC	dlgap1a	0	0.800308	0.214	0.053	0	AC	dlgap1a
ENSDARG00000014420~~elavl3	0	1.72028	0.857	0.16	0	AC	elavl3	0	1.35131	0.636	0.182	0	AC	elavl3
ENSDARG00000014675~~efna3a	3.58407e-134	1.47341	0.321	0.055	1.16554e-129	AC	efna3a	1.6654e-95	0.509394	0.103	0.042	5.41587e-91	AC	efna3a
ENSDARG00000014746~~rbfox1	1.41282e-269	2.25701	0.749	0.165	4.5945e-265	AC	rbfox1	0	2.37686	0.476	0.095	0	AC	rbfox1
ENSDARG00000015003~~arhgap4b	6.222e-19	0.618146	0.196	0.09	2.02339e-14	AC	arhgap4b	0	1.06028	0.204	0.024	0	AC	arhgap4b
ENSDARG00000015015~~tspan18b	4.73437e-09	0.718975	0.217	0.147	0.000153962	AC	tspan18b	0	1.7044	0.528	0.178	0	AC	tspan18b
ENSDARG00000015053~~grip1	6.25661e-67	0.91569	0.639	0.332	2.03465e-62	AC	grip1	9.07805e-132	0.584214	0.366	0.228	2.95218e-127	AC	grip1
ENSDARG00000015566~~dnmt3ab	4.0496e-30	0.783832	0.371	0.209	1.31693e-25	AC	dnmt3ab	3.82646e-142	0.516605	0.148	0.061	1.24437e-137	AC	dnmt3ab
ENSDARG00000016934~~ttyh2	1.60643e-233	2.00691	0.897	0.451	5.22412e-229	AC	ttyh2	0	1.35774	0.509	0.233	0	AC	ttyh2
ENSDARG00000018534~~slc6a9	0	4.58212	0.759	0.031	0	AC	slc6a9	7.57468e-125	1.74559	0.202	0.109	2.46328e-120	AC	slc6a9
ENSDARG00000019213~~CTBP1	9.70904e-56	0.915131	0.247	0.07	3.15738e-51	AC	CTBP1	0	1.02932	0.219	0.043	0	AC	CTBP1
ENSDARG00000019304~~phactr3b	0	1.63434	0.394	0.014	0	AC	phactr3b	0	0.807683	0.193	0.045	0	AC	phactr3b
ENSDARG00000020708~~mdkb	1.10596e-201	1.56114	0.798	0.279	3.59658e-197	AC	mdkb	7.91934e-170	0.724219	0.606	0.441	2.57537e-165	AC	mdkb
ENSDARG00000021305~~slc30a2	0	0.938497	0.148	0	0	AC	slc30a2	1.39159e-289	0.749463	0.06	0.006	4.52546e-285	AC	slc30a2
ENSDARG00000021352~~gria1a	1.94755e-130	1.538	0.221	0.026	6.33343e-126	AC	gria1a	0	0.960959	0.078	0.007	0	AC	gria1a
ENSDARG00000023542~~cdh7a	1.12431e-151	1.27913	0.175	0.012	3.65625e-147	AC	cdh7a	0	1.40323	0.179	0.021	0	AC	cdh7a
ENSDARG00000024785~~ctnna2	3.55043e-92	0.841134	0.985	0.764	1.1546e-87	AC	ctnna2	0	0.756962	0.797	0.49	0	AC	ctnna2
ENSDARG00000024966~~MARK4	1.86613e-41	0.5964	0.677	0.498	6.06864e-37	AC	MARK4	9.35376e-141	0.520809	0.412	0.265	3.04184e-136	AC	MARK4
ENSDARG00000025106~~ppp3cb	6.67203e-291	1.64443	0.49	0.061	2.16974e-286	AC	ppp3cb	2.06851e-232	0.651242	0.203	0.076	6.72679e-228	AC	ppp3cb
ENSDARG00000025189~~cpne8	0	1.88985	0.413	0.013	0	AC	cpne8	0	0.766444	0.098	0.012	0	AC	cpne8
ENSDARG00000025495~~nhlh2	0	2.85963	0.791	0.013	0	AC	nhlh2	0	0.853509	0.129	0.023	0	AC	nhlh2
ENSDARG00000025974~~magi3b	4.17471e-213	2.35599	0.675	0.198	1.35762e-208	AC	magi3b	0	1.11067	0.141	0.031	0	AC	magi3b
ENSDARG00000027618~~grip2b	0	2.7756	0.717	0.143	0	AC	grip2b	1.15025e-214	0.700633	0.075	0.014	3.74062e-210	AC	grip2b
ENSDARG00000027828~~grin1a	0	2.56284	0.605	0.036	0	AC	grin1a	0	1.46986	0.193	0.043	0	AC	grin1a
ENSDARG00000029168~~ppfibp2b	1.97015e-272	0.972493	0.163	0.003	6.40692e-268	AC	ppfibp2b	1.57689e-238	0.624424	0.064	0.009	5.12805e-234	AC	ppfibp2b
ENSDARG00000029689~~tkta	7.66478e-77	1.24505	0.61	0.319	2.49259e-72	AC	tkta	3.58105e-290	0.860363	0.214	0.074	1.16456e-285	AC	tkta
ENSDARG00000030614~~syt1a	0	4.16453	0.819	0.054	0	AC	syt1a	0	2.61706	0.511	0.088	0	AC	syt1a
ENSDARG00000030733~~b3gat2	1.26923e-29	0.684785	0.133	0.037	4.12754e-25	AC	b3gat2	2.84373e-239	0.630813	0.128	0.035	9.2478e-235	AC	b3gat2
ENSDARG00000031372~~efna2a	2.43934e-16	0.54163	0.278	0.154	7.93274e-12	AC	efna2a	9.9712e-143	0.588364	0.278	0.154	3.24264e-138	AC	efna2a
ENSDARG00000031768~~roraa	1.07092e-259	2.7349	0.831	0.315	3.48264e-255	AC	roraa	4.24789e-180	0.64564	0.339	0.183	1.38141e-175	AC	roraa
ENSDARG00000032317~~tox	3.06338e-113	1.0481	0.835	0.488	9.96212e-109	AC	tox	4.21944e-226	0.688599	0.637	0.443	1.37216e-221	AC	tox
ENSDARG00000032565~~cacng2a	1.57137e-101	1.14148	0.31	0.066	5.11009e-97	AC	cacng2a	5.48927e-200	0.666168	0.156	0.055	1.78511e-195	AC	cacng2a
ENSDARG00000032714~~gria1b	0	2.08695	0.298	0.014	0	AC	gria1b	2.8288e-274	0.647236	0.074	0.01	9.19927e-270	AC	gria1b
ENSDARG00000032737~~gria3a	3.65528e-32	0.976833	0.137	0.035	1.1887e-27	AC	gria3a	0	1.95838	0.201	0.027	0	AC	gria3a
ENSDARG00000032868~~pde4ba	1.71227e-75	1.0643	0.363	0.115	5.56829e-71	AC	pde4ba	0	0.779076	0.224	0.069	0	AC	pde4ba
ENSDARG00000033172~~nr2f5	1.56076e-10	0.558657	0.257	0.172	5.0756e-06	AC	nr2f5	2.58169e-136	0.563188	0.138	0.056	8.39565e-132	AC	nr2f5
ENSDARG00000033411~~cabp1b	8.73196e-213	1.41752	0.224	0.014	2.83963e-208	AC	cabp1b	0	0.743565	0.107	0.009	0	AC	cabp1b
ENSDARG00000034344~~pcdh19	3.97688e-242	2.31715	0.69	0.172	1.29328e-237	AC	pcdh19	0	1.57455	0.546	0.227	0	AC	pcdh19
ENSDARG00000034493~~grin2aa	0	4.00581	0.726	0.045	0	AC	grin2aa	0	1.71283	0.177	0.031	0	AC	grin2aa
ENSDARG00000035598~~coro1ca	1.01585e-88	0.999168	0.667	0.393	3.30354e-84	AC	coro1ca	0	1.22913	0.416	0.183	0	AC	coro1ca
ENSDARG00000035907~~fam49al	1.96555e-220	1.55184	0.656	0.168	6.39198e-216	AC	fam49al	8.20129e-154	0.577718	0.282	0.152	2.66706e-149	AC	fam49al
ENSDARG00000036584~~st8sia5	0	1.69077	0.494	0.047	0	AC	st8sia5	0	0.849504	0.21	0.052	0	AC	st8sia5
ENSDARG00000037122~~TENM2	1.03566e-96	1.52385	0.325	0.072	3.36797e-92	AC	TENM2	0	0.634189	0.34	0.118	0	AC	TENM2
ENSDARG00000037607~~nol4lb	4.98102e-250	1.74597	0.768	0.193	1.61983e-245	AC	nol4lb	0	0.770186	0.451	0.207	0	AC	nol4lb
ENSDARG00000037905~~cacna1aa	1.9907e-27	0.670301	0.194	0.066	6.47377e-23	AC	cacna1aa	2.25834e-143	0.687033	0.156	0.066	7.34414e-139	AC	cacna1aa
ENSDARG00000038121~~si:ch211-13k12.2	7.63218e-96	0.970926	0.755	0.481	2.48198e-91	AC	si:ch211-13k12.2	4.43754e-100	0.555238	0.426	0.311	1.44309e-95	AC	si:ch211-13k12.2
ENSDARG00000039497~~ccdc85a	7.41033e-182	1.7514	0.717	0.276	2.40984e-177	AC	ccdc85a	0	1.05279	0.153	0.019	0	AC	ccdc85a
ENSDARG00000040291~~cadm4	4.64971e-155	1.39988	0.985	0.913	1.51208e-150	AC	cadm4	5.79012e-195	0.9114	0.276	0.136	1.88295e-190	AC	cadm4
ENSDARG00000040606~~tfap2c	2.86487e-191	1.58709	0.241	0.019	9.31656e-187	AC	tfap2c	0	2.34923	0.375	0.056	0	AC	tfap2c
ENSDARG00000041791~~mgat4c	8.12205e-190	1.84322	0.342	0.044	2.64129e-185	AC	mgat4c	5.28372e-134	0.630839	0.088	0.028	1.71827e-129	AC	mgat4c
ENSDARG00000042128~~pacsin1b	2.61777e-64	1.01661	0.354	0.118	8.51298e-60	AC	pacsin1b	1.12235e-168	0.629907	0.223	0.107	3.64989e-164	AC	pacsin1b
ENSDARG00000042249~~FRMD4A	2.80266e-73	0.992994	0.57	0.311	9.11426e-69	AC	FRMD4A	0	0.98394	0.345	0.133	0	AC	FRMD4A
ENSDARG00000042690~~s1pr1	5.49604e-82	1.85017	0.471	0.194	1.78731e-77	AC	s1pr1	0	1.80645	0.332	0.075	0	AC	s1pr1
ENSDARG00000042904~~foxo3b	5.09358e-176	1.43386	0.77	0.334	1.65643e-171	AC	foxo3b	7.14523e-248	0.711975	0.279	0.122	2.32363e-243	AC	foxo3b
ENSDARG00000043406~~slc8a1b	0	3.11932	0.688	0.053	0	AC	slc8a1b	1.82544e-122	0.50756	0.08	0.025	5.93632e-118	AC	slc8a1b
ENSDARG00000043410~~xkr6b	5.34169e-157	1.39284	0.352	0.057	1.73712e-152	AC	xkr6b	4.43624e-276	0.55902	0.076	0.011	1.44267e-271	AC	xkr6b
ENSDARG00000043474~~atp2b3a	3.80231e-34	0.667249	0.139	0.035	1.23651e-29	AC	atp2b3a	2.10519e-281	0.867724	0.198	0.066	6.84607e-277	AC	atp2b3a
ENSDARG00000043746~~nrxn3a	0	2.18533	0.614	0.091	0	AC	nrxn3a	0	3.42234	0.639	0.03	0	AC	nrxn3a
ENSDARG00000044281~~erbin	6.89984e-171	1.20475	0.909	0.528	2.24383e-166	AC	erbin	1.73241e-272	0.734116	0.47	0.271	5.63379e-268	AC	erbin
ENSDARG00000044574~~rbms3	1.7032e-104	1.22946	0.574	0.215	5.53881e-100	AC	rbms3	1.10927e-104	0.507794	0.134	0.061	3.60736e-100	AC	rbms3
ENSDARG00000045893~~kctd15a	1.25279e-178	0.898832	0.15	0.006	4.07407e-174	AC	kctd15a	0	1.41585	0.252	0.018	0	AC	kctd15a
ENSDARG00000045936~~pax6b	0	2.83453	0.989	0.465	0	AC	pax6b	0	2.04676	0.665	0.254	0	AC	pax6b
ENSDARG00000052182~~rbfox2	8.1319e-299	1.53692	0.401	0.037	2.64449e-294	AC	rbfox2	0	1.16752	0.35	0.084	0	AC	rbfox2
ENSDARG00000052242~~aff2	5.92172e-120	1.51143	0.772	0.398	1.92574e-115	AC	aff2	0	1.5477	0.312	0.083	0	AC	aff2
ENSDARG00000052782~~glrba	6.42238e-271	1.04991	0.183	0.005	2.08856e-266	AC	glrba	0	0.561495	0.063	0.005	0	AC	glrba
ENSDARG00000053205~~ppfia4	7.91784e-106	1.2902	0.7	0.361	2.57488e-101	AC	ppfia4	0	1.40614	0.31	0.078	0	AC	ppfia4
ENSDARG00000053358~~basp1	1.77639e-194	1.46279	0.454	0.082	5.77683e-190	AC	basp1	0	0.796623	0.184	0.045	0	AC	basp1
ENSDARG00000053583~~cers6	3.99598e-72	1.01046	0.272	0.068	1.29949e-67	AC	cers6	1.79936e-216	0.536032	0.155	0.052	5.85152e-212	AC	cers6
ENSDARG00000054378~~pcbp3	0	3.31644	0.922	0.112	0	AC	pcbp3	0	1.31523	0.809	0.295	0	AC	pcbp3
ENSDARG00000054723~~si:ch211-242b18.1	1.30919e-34	0.743672	0.243	0.089	4.2575e-30	AC	si:ch211-242b18.1	3.32972e-214	0.707719	0.227	0.095	1.08283e-209	AC	si:ch211-242b18.1
ENSDARG00000054749~~lmo4b	2.07384e-63	0.892912	0.224	0.05	6.74413e-59	AC	lmo4b	0	1.23553	0.26	0.067	0	AC	lmo4b
ENSDARG00000055455~~gpm6aa	1.75397e-262	1.79329	0.99	0.613	5.7039e-258	AC	gpm6aa	0	0.805376	0.969	0.741	0	AC	gpm6aa
ENSDARG00000055825~~celsr3	1.12686e-76	1.05988	0.348	0.103	3.66456e-72	AC	celsr3	0	0.719762	0.209	0.065	0	AC	celsr3
ENSDARG00000056092~~si:dkey-12h9.6	0	1.57529	0.46	0.045	0	AC	si:dkey-12h9.6	0	0.807012	0.212	0.058	0	AC	si:dkey-12h9.6
ENSDARG00000056427~~auts2a	1.22563e-233	1.85347	0.96	0.68	3.98575e-229	AC	auts2a	0	0.936074	0.488	0.238	0	AC	auts2a
ENSDARG00000056639~~carmil2	2.88418e-105	1.05921	0.222	0.033	9.37934e-101	AC	carmil2	6.52655e-302	0.63268	0.187	0.057	2.12243e-297	AC	carmil2
ENSDARG00000056740~~tmeff1b	1.87275e-42	0.640622	0.644	0.457	6.09019e-38	AC	tmeff1b	4.82318e-227	0.696599	0.493	0.308	1.5685e-222	AC	tmeff1b
ENSDARG00000057209~~plppr5a	0	1.87224	0.435	0.015	0	AC	plppr5a	0	1.14218	0.138	0.009	0	AC	plppr5a
ENSDARG00000057729~~ephb6	2.45788e-77	0.766646	0.956	0.6	7.99302e-73	AC	ephb6	1.57023e-237	0.624665	0.583	0.377	5.10638e-233	AC	ephb6
ENSDARG00000057913~~syt11a	1.46591e-157	1.41389	0.532	0.134	4.76713e-153	AC	syt11a	4.32159e-209	0.585867	0.206	0.082	1.40538e-204	AC	syt11a
ENSDARG00000058039~~bhlhe22	2.65142e-56	0.742295	0.154	0.028	8.62242e-52	AC	bhlhe22	0	1.06163	0.28	0.081	0	AC	bhlhe22
ENSDARG00000058207~~abi2a	1.84913e-74	1.0751	0.399	0.141	6.01337e-70	AC	abi2a	3.40673e-145	0.614677	0.147	0.061	1.10787e-140	AC	abi2a
ENSDARG00000059279~~tfap2a	1.23462e-157	1.08577	0.215	0.019	4.015e-153	AC	tfap2a	0	2.02761	0.473	0.052	0	AC	tfap2a
ENSDARG00000059368~~gria4b	3.49814e-220	2.19671	0.54	0.112	1.13759e-215	AC	gria4b	0	1.56706	0.28	0.05	0	AC	gria4b
ENSDARG00000059587~~ABR	1.10968e-110	1.04638	0.791	0.516	3.60867e-106	AC	ABR	2.43034e-295	0.888154	0.328	0.15	7.90347e-291	AC	ABR
ENSDARG00000059596~~clip2	3.00068e-107	1.22652	0.597	0.267	9.75822e-103	AC	clip2	5.51939e-214	0.653986	0.257	0.117	1.7949e-209	AC	clip2
ENSDARG00000059775~~slc32a1	0	2.24748	0.622	0.002	0	AC	slc32a1	0	2.73498	0.633	0.037	0	AC	slc32a1
ENSDARG00000059939~~dab1a	8.38815e-204	1.66066	0.945	0.529	2.72783e-199	AC	dab1a	8.13616e-204	0.843183	0.243	0.109	2.64588e-199	AC	dab1a
ENSDARG00000059945~~sv2a	8.33737e-73	0.951953	0.209	0.041	2.71131e-68	AC	sv2a	0	1.3204	0.212	0.044	0	AC	sv2a
ENSDARG00000060243~~enox1	2.4299e-119	1.33943	0.477	0.13	7.90203e-115	AC	enox1	0	1.39389	0.322	0.101	0	AC	enox1
ENSDARG00000060309~~srgap3	1.98574e-283	1.81124	0.981	0.602	6.45764e-279	AC	srgap3	0	1.60042	0.721	0.347	0	AC	srgap3
ENSDARG00000060372~~plxna2	0	3.46411	0.92	0.345	0	AC	plxna2	0	2.93579	0.883	0.315	0	AC	plxna2
ENSDARG00000060532~~adam22	3.40147e-69	0.939106	0.306	0.083	1.10616e-64	AC	adam22	5.40421e-300	0.672567	0.269	0.103	1.75745e-295	AC	adam22
ENSDARG00000060610~~pcdh7b	9.70297e-07	1.09854	0.3	0.234	0.0315541	AC	pcdh7b	8.67216e-231	1.10479	0.322	0.161	2.82019e-226	AC	pcdh7b
ENSDARG00000060875~~pde1a	1.00808e-220	2.41957	0.565	0.127	3.27827e-216	AC	pde1a	6.96476e-115	0.558224	0.062	0.017	2.26494e-110	AC	pde1a
ENSDARG00000061042~~gabbr2	0	2.28256	0.542	0.061	0	AC	gabbr2	1.11339e-287	0.910366	0.194	0.063	3.62073e-283	AC	gabbr2
ENSDARG00000061121~~adgrl3.1	2.14146e-196	1.39066	0.939	0.631	6.96403e-192	AC	adgrl3.1	0	1.32602	0.629	0.264	0	AC	adgrl3.1
ENSDARG00000061371~~cdh18a	5.37095e-14	0.776725	0.272	0.181	1.74663e-09	AC	cdh18a	0	1.16402	0.135	0.014	0	AC	cdh18a
ENSDARG00000061454~~nrxn2a	1.7903e-245	1.84791	0.686	0.144	5.82206e-241	AC	nrxn2a	0	1.54341	0.29	0.099	0	AC	nrxn2a
ENSDARG00000061479~~thsd7aa	2.83866e-23	0.62081	0.3	0.15	9.23133e-19	AC	thsd7aa	8.04165e-291	0.750891	0.508	0.294	2.61515e-286	AC	thsd7aa
ENSDARG00000061635~~myo5aa	1.38598e-83	1.09045	0.439	0.148	4.50722e-79	AC	myo5aa	3.60507e-220	0.595743	0.267	0.12	1.17237e-215	AC	myo5aa
ENSDARG00000061647~~nrxn1a	0	4.17248	0.795	0.073	0	AC	nrxn1a	0	2.19465	0.586	0.171	0	AC	nrxn1a
ENSDARG00000062045~~il1rapl1a	4.34539e-33	0.895575	0.354	0.177	1.41312e-28	AC	il1rapl1a	1.32844e-125	0.69224	0.256	0.145	4.32009e-121	AC	il1rapl1a
ENSDARG00000062123~~agap1	1.07062e-212	1.13688	0.996	0.933	3.48164e-208	AC	agap1	0	0.742787	0.75	0.527	0	AC	agap1
ENSDARG00000062174~~cacnb4b	6.59763e-37	0.843157	0.359	0.179	2.14555e-32	AC	cacnb4b	0	0.699952	0.168	0.038	0	AC	cacnb4b
ENSDARG00000062325~~shank2b	8.57798e-125	1.31283	0.367	0.078	2.78956e-120	AC	shank2b	2.41133e-227	0.695837	0.098	0.022	7.84165e-223	AC	shank2b
ENSDARG00000062510~~bcl11ba	0	2.54387	0.479	0.031	0	AC	bcl11ba	0	1.07989	0.167	0.043	0	AC	bcl11ba
ENSDARG00000062686~~megf11	1.53858e-73	0.531971	0.078	0.005	5.00346e-69	AC	megf11	0	1.6365	0.145	0.016	0	AC	megf11
ENSDARG00000062720~~pcdh1a	2.07739e-160	2.17762	0.673	0.269	6.75568e-156	AC	pcdh1a	5.0763e-297	0.903289	0.174	0.052	1.65081e-292	AC	pcdh1a
ENSDARG00000063007~~apc2	1.0102e-23	0.682736	0.213	0.091	3.28518e-19	AC	apc2	7.06874e-306	0.627619	0.177	0.051	2.29875e-301	AC	apc2
ENSDARG00000063144~~shisa7b	0	1.74496	0.411	0.014	0	AC	shisa7b	0	0.775546	0.169	0.034	0	AC	shisa7b
ENSDARG00000063332~~shank3a	0	4.1797	0.852	0.129	0	AC	shank3a	0	1.78239	0.288	0.071	0	AC	shank3a
ENSDARG00000068100~~tafa5l	0	2.01741	0.471	0.014	0	AC	tafa5l	0	0.787875	0.088	0.013	0	AC	tafa5l
ENSDARG00000068247~~luzp2	1.98313e-47	0.894487	0.342	0.125	6.44913e-43	AC	luzp2	1.64707e-60	0.568299	0.062	0.025	5.35627e-56	AC	luzp2
ENSDARG00000068421~~ttc9b	3.9963e-25	0.635214	0.251	0.109	1.2996e-20	AC	ttc9b	8.80857e-179	0.50536	0.153	0.056	2.86455e-174	AC	ttc9b
ENSDARG00000068989~~gabra1	0	1.74559	0.5	0.052	0	AC	gabra1	4.82445e-221	0.602245	0.25	0.106	1.56891e-216	AC	gabra1
ENSDARG00000069427~~nkain2	2.91391e-116	1.06402	0.888	0.504	9.47604e-112	AC	nkain2	0	1.11101	0.387	0.142	0	AC	nkain2
ENSDARG00000070045~~celf4	5.41573e-66	1.02438	0.352	0.113	1.7612e-61	AC	celf4	0	1.20632	0.233	0.07	0	AC	celf4
ENSDARG00000070074~~lrp8	8.05613e-25	0.769955	0.77	0.723	2.61985e-20	AC	lrp8	1.58981e-95	0.528779	0.359	0.245	5.17007e-91	AC	lrp8
ENSDARG00000070173~~gria2a	0	2.01651	0.576	0.042	0	AC	gria2a	0	1.16611	0.244	0.036	0	AC	gria2a
ENSDARG00000070567~~cadpsb	1.7862e-82	0.981394	0.567	0.235	5.80871e-78	AC	cadpsb	0	0.856793	0.325	0.12	0	AC	cadpsb
ENSDARG00000070626~~cacng8b	3.35237e-26	0.57136	0.127	0.037	1.09019e-21	AC	cacng8b	0	0.721481	0.156	0.035	0	AC	cacng8b
ENSDARG00000071375~~celf5a	0	2.34103	0.968	0.332	0	AC	celf5a	0	2.92	0.64	0.109	0	AC	celf5a
ENSDARG00000073707~~cnksr2b	3.29437e-42	0.879578	0.247	0.086	1.07133e-37	AC	cnksr2b	0	0.971406	0.209	0.032	0	AC	cnksr2b
ENSDARG00000073769~~magi2b	1.06456e-214	1.55082	0.734	0.241	3.46194e-210	AC	magi2b	0	0.804806	0.266	0.101	0	AC	magi2b
ENSDARG00000075133~~adgrb1a	1.30996e-215	1.58007	0.422	0.06	4.26e-211	AC	adgrb1a	0	0.891346	0.169	0.037	0	AC	adgrb1a
ENSDARG00000075158~~igdcc3	4.4974e-46	0.906082	0.513	0.273	1.46255e-41	AC	igdcc3	0	1.62854	0.547	0.196	0	AC	igdcc3
ENSDARG00000075437~~shc1	1.19938e-62	0.996247	0.529	0.299	3.90039e-58	AC	shc1	1.2409e-182	0.670554	0.201	0.088	4.03542e-178	AC	shc1
ENSDARG00000075735~~cxxc5b	8.05882e-253	1.62461	0.603	0.116	2.62073e-248	AC	cxxc5b	5.71728e-215	0.656697	0.167	0.06	1.85926e-210	AC	cxxc5b
ENSDARG00000075819~~arhgef2	2.26108e-30	0.558403	0.658	0.46	7.35303e-26	AC	arhgef2	1.12314e-95	0.570048	0.325	0.219	3.65246e-91	AC	arhgef2
ENSDARG00000075849~~prr12b	1.25733e-45	0.869109	0.257	0.085	4.08884e-41	AC	prr12b	3.51928e-139	0.519029	0.281	0.157	1.14447e-134	AC	prr12b
ENSDARG00000075928~~hivep3a	1.20006e-14	0.534486	0.329	0.214	3.9026e-10	AC	hivep3a	6.45476e-273	0.503856	0.096	0.018	2.09909e-268	AC	hivep3a
ENSDARG00000076213~~DOCK4	1.04165e-140	1.15767	0.772	0.316	3.38746e-136	AC	DOCK4	0	0.698594	0.378	0.155	0	AC	DOCK4
ENSDARG00000076310~~ENSDARG00000076310	0	1.75588	0.504	0.04	0	AC	ENSDARG00000076310	0	1.13703	0.268	0.049	0	AC	ENSDARG00000076310
ENSDARG00000076401~~cacng3b	0	1.81162	0.401	0.036	0	AC	cacng3b	0	1.78021	0.364	0.041	0	AC	cacng3b
ENSDARG00000077053~~ppfia3	1.30508e-132	1.20272	0.3	0.049	4.24413e-128	AC	ppfia3	0	0.748379	0.179	0.045	0	AC	ppfia3
ENSDARG00000077134~~gpr158a	4.28976e-40	0.717567	0.183	0.049	1.39503e-35	AC	gpr158a	0	1.17561	0.131	0.012	0	AC	gpr158a
ENSDARG00000077162~~nwd2	4.76433e-136	1.29278	0.39	0.078	1.54936e-131	AC	nwd2	0	0.846319	0.132	0.021	0	AC	nwd2
ENSDARG00000077428~~camta1a	8.79123e-101	1.14396	0.401	0.107	2.85891e-96	AC	camta1a	0	0.925357	0.201	0.039	0	AC	camta1a
ENSDARG00000077840~~meis2a	2.46841e-42	0.707195	0.116	0.021	8.02727e-38	AC	meis2a	0	2.02867	0.39	0.055	0	AC	meis2a
ENSDARG00000077847~~olfm2a	1.18716e-199	1.61807	0.411	0.062	3.86064e-195	AC	olfm2a	0	2.29707	0.332	0.032	0	AC	olfm2a
ENSDARG00000077920~~csmd3a	8.96987e-219	2.25279	0.466	0.075	2.917e-214	AC	csmd3a	5.205e-119	0.774239	0.113	0.045	1.69267e-114	AC	csmd3a
ENSDARG00000077994~~b4galt2	2.56059e-132	1.26237	0.614	0.214	8.32704e-128	AC	b4galt2	0	0.823619	0.285	0.098	0	AC	b4galt2
ENSDARG00000077996~~cdh24b	3.84784e-168	1.08663	0.196	0.014	1.25132e-163	AC	cdh24b	2.03179e-144	0.514465	0.092	0.028	6.60739e-140	AC	cdh24b
ENSDARG00000078011~~NAV1	6.41893e-61	0.581621	0.897	0.476	2.08744e-56	AC	NAV1	0	1.00878	0.362	0.134	0	AC	NAV1
ENSDARG00000078430~~tiam1a	0	2.86048	0.831	0.121	0	AC	tiam1a	0	2.51608	0.593	0.071	0	AC	tiam1a
ENSDARG00000078701~~prdm13	0	3.16568	0.882	0.015	0	AC	prdm13	0	1.23976	0.177	0.02	0	AC	prdm13
ENSDARG00000078755~~plppr4b	3.33551e-51	0.843781	0.171	0.038	1.08471e-46	AC	plppr4b	0	0.632296	0.121	0.018	0	AC	plppr4b
ENSDARG00000078778~~lrch1	4.33539e-25	0.675784	0.399	0.247	1.40987e-20	AC	lrch1	0	0.840597	0.264	0.084	0	AC	lrch1
ENSDARG00000078898~~pcdh7a	1.75593e-30	0.661056	0.125	0.032	5.71027e-26	AC	pcdh7a	1.13968e-125	0.725423	0.091	0.031	3.70624e-121	AC	pcdh7a
ENSDARG00000079201~~tshz2	2.03101e-150	1.87003	0.827	0.439	6.60483e-146	AC	tshz2	0	1.23006	0.178	0.05	0	AC	tshz2
ENSDARG00000079286~~bcr	4.17975e-39	0.666886	0.576	0.383	1.35925e-34	AC	bcr	1.87398e-184	0.570815	0.242	0.113	6.09417e-180	AC	bcr
ENSDARG00000079414~~sez6b	9.24993e-11	0.584505	0.175	0.095	3.00808e-06	AC	sez6b	3.25179e-45	0.519279	0.159	0.1	1.05748e-40	AC	sez6b
ENSDARG00000079586~~gabrb2a	0	2.58944	0.479	0.029	0	AC	gabrb2a	1.99049e-168	0.680746	0.088	0.023	6.47307e-164	AC	gabrb2a
ENSDARG00000079742~~mcf2l2	6.83885e-108	0.922792	0.582	0.171	2.22399e-103	AC	mcf2l2	0	0.775411	0.249	0.086	0	AC	mcf2l2
ENSDARG00000079840~~kcnma1a	7.48423e-78	1.1551	0.709	0.398	2.43387e-73	AC	kcnma1a	8.34595e-259	1.18689	0.459	0.274	2.7141e-254	AC	kcnma1a
ENSDARG00000079977~~nhsb	3.07258e-92	0.994869	0.593	0.198	9.99202e-88	AC	nhsb	0	0.772754	0.335	0.139	0	AC	nhsb
ENSDARG00000080009~~bahcc1b	4.85509e-207	1.4187	0.907	0.502	1.57888e-202	AC	bahcc1b	8.20269e-129	0.659129	0.571	0.447	2.66751e-124	AC	bahcc1b
ENSDARG00000087260~~mtss1lb	2.43761e-144	1.29624	0.863	0.425	7.9271e-140	AC	mtss1lb	0	1.3439	0.547	0.18	0	AC	mtss1lb
ENSDARG00000088087~~kdm6ba	6.46783e-40	0.551843	0.688	0.539	2.10334e-35	AC	kdm6ba	3.90168e-230	0.652481	0.513	0.323	1.26883e-225	AC	kdm6ba
ENSDARG00000090064~~CABZ01084273.1	5.75067e-124	0.723044	0.116	0.006	1.87012e-119	AC	CABZ01084273.1	0	0.704899	0.162	0.036	0	AC	CABZ01084273.1
ENSDARG00000090338~~fam20cb	7.12371e-09	0.776816	0.243	0.179	0.000231663	AC	fam20cb	3.45876e-81	0.556387	0.08	0.032	1.12479e-76	AC	fam20cb
ENSDARG00000090973~~si:dkey-264d12.1	8.93981e-43	0.845431	0.226	0.071	2.90722e-38	AC	si:dkey-264d12.1	3.2042e-137	0.519181	0.077	0.022	1.042e-132	AC	si:dkey-264d12.1
ENSDARG00000092039~~si:dkey-70p6.1	1.58778e-173	1.05678	0.226	0.019	5.16347e-169	AC	si:dkey-70p6.1	2.76359e-278	0.596634	0.156	0.044	8.9872e-274	AC	si:dkey-70p6.1
ENSDARG00000092307~~CR456642.2	2.54048e-87	1.06971	0.279	0.062	8.26164e-83	AC	CR456642.2	0	0.72866	0.149	0.03	0	AC	CR456642.2
ENSDARG00000094377~~samd10b	0	1.80225	0.38	0.029	0	AC	samd10b	0	1.43817	0.165	0.03	0	AC	samd10b
ENSDARG00000094587~~si:dkey-35m8.1	1.15792e-49	1.2107	0.43	0.204	3.76557e-45	AC	si:dkey-35m8.1	2.15231e-193	0.792369	0.107	0.03	6.99932e-189	AC	si:dkey-35m8.1
ENSDARG00000095017~~BX927275.2	1.31306e-236	0.984842	0.188	0.007	4.27005e-232	AC	BX927275.2	0	0.916792	0.126	0.004	0	AC	BX927275.2
ENSDARG00000096558~~CR556696.1	3.10383e-31	0.727498	0.127	0.033	1.00936e-26	AC	CR556696.1	3.58671e-301	0.675859	0.064	0.006	1.1664e-296	AC	CR556696.1
ENSDARG00000097055~~si:ch211-284f22.3	1.84996e-14	0.539975	0.346	0.241	6.01605e-10	AC	si:ch211-284f22.3	0	1.05973	0.421	0.192	0	AC	si:ch211-284f22.3
ENSDARG00000097077~~CR318607.1	4.50225e-46	0.580651	0.112	0.018	1.46413e-41	AC	CR318607.1	0	0.95267	0.242	0.083	0	AC	CR318607.1
ENSDARG00000097226~~CR847887.1	3.2492e-107	1.13913	0.316	0.065	1.05664e-102	AC	CR847887.1	2.30109e-183	0.50684	0.12	0.037	7.48316e-179	AC	CR847887.1
ENSDARG00000097670~~BX005048.1	2.35907e-192	1.11818	0.222	0.016	7.6717e-188	AC	BX005048.1	0	0.792715	0.13	0.016	0	AC	BX005048.1
ENSDARG00000098349~~hdac4	2.02456e-172	1.07603	0.983	0.757	6.58387e-168	AC	hdac4	8.1576e-260	0.882803	0.639	0.457	2.65285e-255	AC	hdac4
ENSDARG00000098435~~BX005003.1	2.02116e-184	1.75709	0.447	0.082	6.57281e-180	AC	BX005003.1	3.00637e-39	0.82259	0.111	0.068	9.77672e-35	AC	BX005003.1
ENSDARG00000098702~~zgc:165603	0	1.36365	0.298	0.013	0	AC	zgc:165603	0	0.884659	0.154	0.022	0	AC	zgc:165603
ENSDARG00000098788~~pcdh2g28	6.78634e-161	0.808789	0.975	0.909	2.20692e-156	AC	pcdh2g28	0	0.667431	0.665	0.411	0	AC	pcdh2g28
ENSDARG00000098832~~fam168a	6.61041e-186	1.29237	0.867	0.463	2.14971e-181	AC	fam168a	7.56282e-199	0.586816	0.498	0.318	2.45943e-194	AC	fam168a
ENSDARG00000098880~~pclob	1.42797e-99	1.14769	0.312	0.069	4.64375e-95	AC	pclob	1.11024e-211	0.588203	0.185	0.068	3.61049e-207	AC	pclob
ENSDARG00000098936~~kif5aa	1.75267e-21	0.609442	0.137	0.047	5.6997e-17	AC	kif5aa	1.47012e-201	0.527478	0.176	0.066	4.78083e-197	AC	kif5aa
ENSDARG00000099034~~unc5a	9.31233e-68	1.45052	0.342	0.1	3.02837e-63	AC	unc5a	0	1.42013	0.34	0.086	0	AC	unc5a
ENSDARG00000099096~~gabrb4	0	2.36974	0.525	0.019	0	AC	gabrb4	0	1.05444	0.216	0.033	0	AC	gabrb4
ENSDARG00000099446~~slit1b	0	3.37853	0.762	0.004	0	AC	slit1b	0	1.54011	0.207	0.014	0	AC	slit1b
ENSDARG00000100267~~GRM7	0	2.10307	0.449	0.029	0	AC	GRM7	4.05624e-250	0.713393	0.101	0.022	1.31909e-245	AC	GRM7
ENSDARG00000100821~~scrt1a	2.83869e-197	1.08379	0.215	0.014	9.23141e-193	AC	scrt1a	0	1.28187	0.164	0.016	0	AC	scrt1a
ENSDARG00000100851~~gphnb	2.21131e-174	1.40562	0.407	0.07	7.19117e-170	AC	gphnb	6.45325e-219	0.510223	0.167	0.057	2.0986e-214	AC	gphnb
ENSDARG00000101131~~pbx1b	0	2.26739	0.762	0.102	0	AC	pbx1b	0	2.11607	0.347	0.076	0	AC	pbx1b
ENSDARG00000101419~~drp2	6.02676e-174	1.80499	0.464	0.092	1.9599e-169	AC	drp2	8.70581e-275	0.936569	0.107	0.022	2.83113e-270	AC	drp2
ENSDARG00000101457~~cdc42ep4a	6.53565e-33	0.780326	0.259	0.105	2.12539e-28	AC	cdc42ep4a	1.63689e-142	0.51701	0.13	0.05	5.32317e-138	AC	cdc42ep4a
ENSDARG00000101508~~nr6a1a	1.14133e-169	1.37754	0.42	0.077	3.71161e-165	AC	nr6a1a	0	1.54213	0.506	0.158	0	AC	nr6a1a
ENSDARG00000101606~~rims2a	1.76624e-54	0.905456	0.27	0.081	5.7438e-50	AC	rims2a	0	0.805937	0.215	0.07	0	AC	rims2a
ENSDARG00000102153~~nrp1a	4.98634e-25	0.848129	0.283	0.146	1.62156e-20	AC	nrp1a	0	2.10022	0.475	0.087	0	AC	nrp1a
ENSDARG00000102730~~mapk10	3.68096e-153	1.22549	0.829	0.312	1.19705e-148	AC	mapk10	0	0.673988	0.396	0.168	0	AC	mapk10
ENSDARG00000102773~~cacna1da	6.03393e-264	1.66243	0.456	0.058	1.96223e-259	AC	cacna1da	0	0.982491	0.205	0.051	0	AC	cacna1da
ENSDARG00000102879~~myt1b	7.36292e-155	1.35843	0.496	0.109	2.39442e-150	AC	myt1b	0	0.907119	0.514	0.256	0	AC	myt1b
ENSDARG00000103379~~pax6a	3.8778e-296	3.25376	0.92	0.423	1.26106e-291	AC	pax6a	0	1.96036	0.799	0.356	0	AC	pax6a
ENSDARG00000103535~~SORCS3	4.47524e-168	2.73368	0.466	0.1	1.45535e-163	AC	SORCS3	9.87439e-293	0.745933	0.084	0.013	3.21115e-288	AC	SORCS3
ENSDARG00000103900~~sept9b	8.14037e-16	0.538031	0.135	0.055	2.64725e-11	AC	sept9b	1.74969e-130	0.689649	0.081	0.025	5.69e-126	AC	sept9b
ENSDARG00000103937~~ndrg4	1.1326e-301	1.87389	0.943	0.338	3.68322e-297	AC	ndrg4	1.63042e-267	0.562391	0.413	0.203	5.30214e-263	AC	ndrg4
ENSDARG00000104101~~RIMBP2	0	2.39956	0.648	0.03	0	AC	RIMBP2	1.74609e-294	0.709182	0.131	0.031	5.67827e-290	AC	RIMBP2
ENSDARG00000104119~~kalrna	2.41627e-173	1.34697	0.409	0.07	7.85771e-169	AC	kalrna	1.39972e-213	0.569584	0.147	0.048	4.55191e-209	AC	kalrna
ENSDARG00000104361~~barhl2	3.78819e-104	0.935392	0.175	0.02	1.23192e-99	AC	barhl2	0	1.21264	0.287	0.061	0	AC	barhl2
ENSDARG00000104820~~psd3l	7.58461e-153	1.24823	0.791	0.397	2.46652e-148	AC	psd3l	0	0.880642	0.379	0.171	0	AC	psd3l
ENSDARG00000105088~~tenm4	2.33533e-83	1.83197	0.793	0.403	7.5945e-79	AC	tenm4	3.5557e-223	1.58659	0.35	0.196	1.15631e-218	AC	tenm4
ENSDARG00000105178~~erc2	1.02812e-71	1.01361	0.357	0.111	3.34346e-67	AC	erc2	0	0.731534	0.292	0.111	0	AC	erc2
ENSDARG00000107408~~TCF4	0	2.537	0.903	0.336	0	AC	TCF4	3.06939e-168	0.710952	0.125	0.043	9.98167e-164	AC	TCF4
ENSDARG00000109358~~trhde.2	0	2.38574	0.548	0.048	0	AC	trhde.2	0	1.09177	0.112	0.008	0	AC	trhde.2
ENSDARG00000110528~~sypa	2.13511e-104	0.992374	0.209	0.029	6.94338e-100	AC	sypa	6.22337e-290	0.877363	0.25	0.096	2.02384e-285	AC	sypa
ENSDARG00000111837~~trhde.2	0	3.16815	0.587	0.022	0	AC	trhde.2	0	1.59427	0.132	0.009	0	AC	trhde.2
ENSDARG00000113411~~lrrc4ca	0	2.82021	0.681	0.057	0	AC	lrrc4ca	9.13165e-264	0.758285	0.08	0.013	2.96961e-259	AC	lrrc4ca
ENSDARG00000113702~~RIMS2	4.74539e-206	1.46936	0.631	0.146	1.5432e-201	AC	RIMS2	0	0.858747	0.392	0.159	0	AC	RIMS2
ENSDARG00000117297~~CABZ01026153.1	8.43555e-222	1.49058	0.523	0.089	2.74324e-217	AC	CABZ01026153.1	3.77213e-160	0.55704	0.153	0.06	1.2267e-155	AC	CABZ01026153.1
ENSDARG00000117547~~CABZ01086127.1	0	2.67902	0.894	0.234	0	AC	CABZ01086127.1	3.2954e-101	0.62689	0.114	0.049	1.07166e-96	AC	CABZ01086127.1
ENSDARG00000000472~~cntn2	0	2.36701	0.637	0.013	0	RGC	cntn2	0	2.37802	0.438	0.017	0	RGC	cntn2
ENSDARG00000000503~~stx1b	0	1.8294	0.908	0.124	0	RGC	stx1b	0	0.847607	0.494	0.173	0	RGC	stx1b
ENSDARG00000001559~~csmd2	0	3.01112	0.804	0.002	0	RGC	csmd2	0	0.770835	0.118	0.016	0	RGC	csmd2
ENSDARG00000001785~~irx2a	0	0.536729	0.137	0	0	RGC	irx2a	0	0.752103	0.132	0.004	0	RGC	irx2a
ENSDARG00000001835~~nalcn	0	1.17844	0.585	0.062	0	RGC	nalcn	2.2652e-276	0.525441	0.148	0.035	7.36642e-272	RGC	nalcn
ENSDARG00000001889~~tuba1a	1.88578e-103	0.855084	0.798	0.321	6.13256e-99	RGC	tuba1a	1.5424e-201	0.584862	0.566	0.33	5.01588e-197	RGC	tuba1a
ENSDARG00000001994~~stxbp1a	0	1.69202	0.846	0.073	0	RGC	stxbp1a	0	1.09049	0.39	0.082	0	RGC	stxbp1a
ENSDARG00000002167~~cacnb1	6.06023e-243	1.32113	0.717	0.172	1.97079e-238	RGC	cacnb1	0	0.622526	0.115	0.009	0	RGC	cacnb1
ENSDARG00000002587~~dpysl3	0	1.76628	0.764	0.053	0	RGC	dpysl3	0	1.2558	0.372	0.06	0	RGC	dpysl3
ENSDARG00000003403~~tenm1	2.09835e-213	0.978689	0.472	0.072	6.82383e-209	RGC	tenm1	0	0.94994	0.188	0.033	0	RGC	tenm1
ENSDARG00000003487~~nup93	0	1.58138	0.801	0.1	0	RGC	nup93	9.69726e-213	0.627077	0.258	0.104	3.15355e-208	RGC	nup93
ENSDARG00000003512~~anks1b	9.17787e-51	0.505858	0.54	0.227	2.98464e-46	RGC	anks1b	0	0.670287	0.179	0.041	0	RGC	anks1b
ENSDARG00000003655~~tmem59l	0	1.27658	0.52	0.018	0	RGC	tmem59l	0	0.647323	0.24	0.071	0	RGC	tmem59l
ENSDARG00000003680~~runx1t1	0	1.74279	0.789	0.083	0	RGC	runx1t1	0	1.82761	0.418	0.045	0	RGC	runx1t1
ENSDARG00000004023~~isl1	0	1.23289	0.41	0.032	0	RGC	isl1	0	0.597018	0.376	0.133	0	RGC	isl1
ENSDARG00000004158~~tmem63c	0	1.31473	0.492	0.02	0	RGC	tmem63c	0	1.35724	0.29	0.016	0	RGC	tmem63c
ENSDARG00000004227~~pde3a	4.87117e-98	0.639263	0.577	0.165	1.5841e-93	RGC	pde3a	0	0.708811	0.193	0.042	0	RGC	pde3a
ENSDARG00000004302~~slc45a1	1.50844e-214	0.722159	0.236	0.016	4.90545e-210	RGC	slc45a1	0	0.520564	0.123	0.021	0	RGC	slc45a1
ENSDARG00000004621~~gpm6ab	1.27132e-205	1.20048	0.997	0.668	4.13432e-201	RGC	gpm6ab	0	1.41492	0.978	0.67	0	RGC	gpm6ab
ENSDARG00000004988~~ppp3ca	0	3.01306	0.962	0.033	0	RGC	ppp3ca	0	2.09639	0.573	0.051	0	RGC	ppp3ca
ENSDARG00000005453~~foxp2	4.8174e-142	1.16566	0.403	0.085	1.56662e-137	RGC	foxp2	0	1.70304	0.246	0.084	0	RGC	foxp2
ENSDARG00000005479~~tenm3	0	3.20532	0.995	0.215	0	RGC	tenm3	0	2.06277	0.421	0.142	0	RGC	tenm3
ENSDARG00000005559~~pou4f1	0	1.2875	0.443	0.002	0	RGC	pou4f1	0	0.75979	0.137	0.008	0	RGC	pou4f1
ENSDARG00000005775~~scn8aa	0	2.34178	0.931	0.096	0	RGC	scn8aa	0	1.88291	0.566	0.071	0	RGC	scn8aa
ENSDARG00000006301~~RAPH1	4.54833e-179	1.26223	0.918	0.361	1.47912e-174	RGC	RAPH1	0	0.914644	0.54	0.2	0	RGC	RAPH1
ENSDARG00000006383~~stxbp5l	7.21477e-268	1.48618	0.821	0.206	2.34624e-263	RGC	stxbp5l	0	1.32539	0.415	0.086	0	RGC	stxbp5l
ENSDARG00000006497~~rtn1a	0	2.71972	0.997	0.456	0	RGC	rtn1a	0	2.15968	0.952	0.364	0	RGC	rtn1a
ENSDARG00000006832~~galnt9	6.90821e-87	0.626189	0.43	0.115	2.24655e-82	RGC	galnt9	2.09171e-250	0.620032	0.222	0.073	6.80225e-246	RGC	galnt9
ENSDARG00000006849~~asic2	0	2.53468	0.878	0.168	0	RGC	asic2	3.60022e-288	0.843059	0.164	0.041	1.17079e-283	RGC	asic2
ENSDARG00000006859~~nkain1	6.94245e-106	0.637913	0.338	0.07	2.25768e-101	RGC	nkain1	0	0.775279	0.394	0.16	0	RGC	nkain1
ENSDARG00000006923~~cacna1ab	0	3.09254	0.881	0.007	0	RGC	cacna1ab	0	2.24993	0.407	0.011	0	RGC	cacna1ab
ENSDARG00000007149~~l1cama	0	1.52475	0.513	0.015	0	RGC	l1cama	0	0.887805	0.155	0.019	0	RGC	l1cama
ENSDARG00000007172~~plxna3	1.54894e-294	1.66741	0.997	0.647	5.03715e-290	RGC	plxna3	0	0.867664	0.771	0.465	0	RGC	plxna3
ENSDARG00000007398~~lrrk1	2.26217e-202	0.937797	0.413	0.061	7.35657e-198	RGC	lrrk1	0	0.573728	0.119	0.013	0	RGC	lrrk1
ENSDARG00000008107~~src	0	1.70414	0.828	0.084	0	RGC	src	3.16112e-219	0.50078	0.191	0.062	1.028e-214	RGC	src
ENSDARG00000008209~~myt1la	0	1.76673	0.799	0.068	0	RGC	myt1la	0	1.15071	0.279	0.037	0	RGC	myt1la
ENSDARG00000008249~~ptchd4	0	1.19818	0.416	0.003	0	RGC	ptchd4	0	0.646426	0.116	0.006	0	RGC	ptchd4
ENSDARG00000008398~~cacna1c	0	1.61511	0.818	0.11	0	RGC	cacna1c	0	0.828025	0.153	0.009	0	RGC	cacna1c
ENSDARG00000008407~~tspan7b	0	1.44813	0.753	0.088	0	RGC	tspan7b	0	1.08759	0.378	0.095	0	RGC	tspan7b
ENSDARG00000009026~~ank2a	0	2.39355	0.868	0.005	0	RGC	ank2a	0	1.15964	0.272	0.024	0	RGC	ank2a
ENSDARG00000009031~~tnikb	3.20341e-110	0.782219	0.94	0.508	1.04175e-105	RGC	tnikb	0	0.806585	0.472	0.21	0	RGC	tnikb
ENSDARG00000009106~~serinc1	6.31414e-199	1.29633	0.783	0.241	2.05336e-194	RGC	serinc1	2.86823e-209	0.56382	0.562	0.322	9.32747e-205	RGC	serinc1
ENSDARG00000009499~~syne1a	3.86864e-128	0.754994	0.824	0.255	1.25808e-123	RGC	syne1a	0	1.19303	0.428	0.105	0	RGC	syne1a
ENSDARG00000009553~~gng3	5.47891e-180	0.687367	0.231	0.02	1.78174e-175	RGC	gng3	0	0.645642	0.211	0.053	0	RGC	gng3
ENSDARG00000009930~~cadm2a	9.79833e-247	1.30778	0.789	0.194	3.18642e-242	RGC	cadm2a	0	1.61494	0.317	0.03	0	RGC	cadm2a
ENSDARG00000010083~~rbfox3a	0	2.07146	0.987	0.325	0	RGC	rbfox3a	0	1.97452	0.471	0.061	0	RGC	rbfox3a
ENSDARG00000010144~~plppr3a	5.25745e-90	0.71287	0.677	0.246	1.70972e-85	RGC	plppr3a	1.0107e-240	0.628317	0.389	0.181	3.2868e-236	RGC	plppr3a
ENSDARG00000011065~~camk2b1	0	1.59994	0.962	0.355	0	RGC	camk2b1	0	0.910799	0.404	0.154	0	RGC	camk2b1
ENSDARG00000011141~~dpysl5a	5.1708e-277	1.27839	0.841	0.204	1.68154e-272	RGC	dpysl5a	3.48007e-238	0.579892	0.22	0.075	1.13172e-233	RGC	dpysl5a
ENSDARG00000011506~~lpcat1	5.69724e-164	1.02385	0.446	0.086	1.85274e-159	RGC	lpcat1	0	1.212	0.314	0.068	0	RGC	lpcat1
ENSDARG00000011602~~CRACD	0	1.82135	0.818	0.048	0	RGC	CRACD	0	1.08666	0.263	0.029	0	RGC	CRACD
ENSDARG00000012684~~atp2b1a	2.37198e-117	0.919296	0.876	0.337	7.71366e-113	RGC	atp2b1a	0	0.794333	0.492	0.237	0	RGC	atp2b1a
ENSDARG00000013500~~abca2	0	1.93813	0.833	0.134	0	RGC	abca2	0	1.39319	0.317	0.047	0	RGC	abca2
ENSDARG00000013615~~pbx3b	9.20823e-40	0.528378	0.861	0.581	2.99452e-35	RGC	pbx3b	0	2.60172	0.608	0.141	0	RGC	pbx3b
ENSDARG00000014053~~olfm1b	0	1.42479	0.672	0.066	0	RGC	olfm1b	0	0.979204	0.378	0.116	0	RGC	olfm1b
ENSDARG00000014287~~eno2	4.28338e-271	1.26529	0.674	0.123	1.39296e-266	RGC	eno2	0	0.777184	0.188	0.028	0	RGC	eno2
ENSDARG00000014420~~elavl3	0	2.86598	0.988	0.148	0	RGC	elavl3	0	2.50606	0.882	0.171	0	RGC	elavl3
ENSDARG00000014652~~ankrd13b	0	1.11031	0.371	0.001	0	RGC	ankrd13b	0	0.593394	0.107	0.003	0	RGC	ankrd13b
ENSDARG00000014675~~efna3a	0	2.10836	0.791	0.026	0	RGC	efna3a	0	1.80221	0.292	0.024	0	RGC	efna3a
ENSDARG00000014746~~rbfox1	0	3.02089	0.89	0.153	0	RGC	rbfox1	0	1.9076	0.538	0.101	0	RGC	rbfox1
ENSDARG00000014891~~robo2	1.94613e-305	1.38055	0.824	0.175	6.32883e-301	RGC	robo2	0	1.41907	0.509	0.113	0	RGC	robo2
ENSDARG00000015002~~cdh4	3.21059e-188	1.6614	0.873	0.389	1.04408e-183	RGC	cdh4	0	1.7015	0.366	0.134	0	RGC	cdh4
ENSDARG00000015016~~kif26ab	0	2.98842	0.856	0.087	0	RGC	kif26ab	0	2.11827	0.387	0.04	0	RGC	kif26ab
ENSDARG00000015025~~l1camb	0	1.65008	0.632	0.009	0	RGC	l1camb	0	1.09301	0.229	0.009	0	RGC	l1camb
ENSDARG00000015053~~grip1	0	1.86557	0.918	0.314	0	RGC	grip1	0	0.864323	0.513	0.217	0	RGC	grip1
ENSDARG00000015184~~mpp3a	1.10476e-111	0.746393	0.528	0.145	3.59268e-107	RGC	mpp3a	0	0.590879	0.15	0.028	0	RGC	mpp3a
ENSDARG00000015199~~cblb	7.15636e-75	1.078	0.44	0.16	2.32725e-70	RGC	cblb	0	1.66684	0.292	0.022	0	RGC	cblb
ENSDARG00000015449~~fut8a	2.28319e-171	1.086	0.941	0.441	7.42493e-167	RGC	fut8a	1.57822e-125	0.531525	0.4	0.239	5.13236e-121	RGC	fut8a
ENSDARG00000015536~~sox6	3.42643e-126	1.36221	0.438	0.115	1.11427e-121	RGC	sox6	0	2.49718	0.3	0.058	0	RGC	sox6
ENSDARG00000015627~~rgs6	3.57869e-265	1.13823	0.555	0.08	1.16379e-260	RGC	rgs6	0	0.748317	0.111	0.018	0	RGC	rgs6
ENSDARG00000016153~~dag1	1.95916e-48	0.714659	0.895	0.538	6.3712e-44	RGC	dag1	0	1.42839	0.54	0.296	0	RGC	dag1
ENSDARG00000016676~~gnao1a	0	1.31795	1	0.892	0	RGC	gnao1a	0	1.96554	0.908	0.353	0	RGC	gnao1a
ENSDARG00000016981~~bcar3	1.6089e-99	1.04905	0.323	0.075	5.23213e-95	RGC	bcar3	0	1.1726	0.199	0.042	0	RGC	bcar3
ENSDARG00000017294~~gnai2b	2.05038e-165	0.924049	0.577	0.135	6.66785e-161	RGC	gnai2b	7.09231e-295	0.579902	0.165	0.04	2.30642e-290	RGC	gnai2b
ENSDARG00000017338~~kidins220b	2.35254e-228	1.21702	0.885	0.257	7.65046e-224	RGC	kidins220b	0	1.08996	0.517	0.182	0	RGC	kidins220b
ENSDARG00000017710~~ppp1r14ab	0	0.898795	0.291	0.013	0	RGC	ppp1r14ab	1.02518e-300	0.643864	0.188	0.05	3.33388e-296	RGC	ppp1r14ab
ENSDARG00000017790~~chrnb2	0	1.50853	0.6	0.014	0	RGC	chrnb2	0	0.587339	0.13	0.016	0	RGC	chrnb2
ENSDARG00000017880~~kcnip3b	0	1.66355	0.435	0	0	RGC	kcnip3b	0	0.638339	0.07	0.004	0	RGC	kcnip3b
ENSDARG00000018032~~scn8ab	0	1.91568	0.793	0.023	0	RGC	scn8ab	0	0.697779	0.173	0.025	0	RGC	scn8ab
ENSDARG00000018270~~olfm1a	0	1.02397	0.336	0.005	0	RGC	olfm1a	0	0.607312	0.133	0.019	0	RGC	olfm1a
ENSDARG00000018896~~mmp24	0	1.32868	0.503	0.014	0	RGC	mmp24	0	0.922249	0.202	0.013	0	RGC	mmp24
ENSDARG00000019658~~pou2f2a	2.6379e-97	0.953099	0.512	0.171	8.57844e-93	RGC	pou2f2a	1.11143e-256	0.791107	0.292	0.118	3.61438e-252	RGC	pou2f2a
[truncated: 926 more rows]

## Sheet: tab2
Peak	Gene	PtoG_cor	Index_Peak_new	injury..Log2FC	injury..FDR	injury..MeanDiff	injury..celltype	dev..Log2FC	dev..FDR	dev..MeanDiff	dev..celltype
chr1:10378439-10378939	dachb	0.8274536125145	dachb::TSS	1.96349	1.72297e-06	0.289383	MG	1.14214	0.00758312	0.0868549	MG
chr1:10378951-10379451	dachb	0.738140492158608	dachb::Body	1.71335	0.00992224	0.105008	MG	1.12479	0.233972	0.0364246	MG
chr1:10395563-10396063	dachb	0.581936071894179	dachb::Body	3.34729	0.0416502	0.0694031	MG	3.33808	0.0153054	0.0597375	MG
chr1:10406608-10407108	dachb	0.850404670271305	dachb::Body	2.70716	6.32643e-06	0.200676	MG	2.87557	3.18313e-06	0.154547	MG
chr1:11831782-11832282	ttyh3b	0.571786880152174	ttyh3b::Body	1.31527	0.00149246	0.129248	MG	1.07995	0.00159267	0.130438	MG
chr1:11832304-11832804	ttyh3b	0.685496710062946	ttyh3b::Body	1.52955	0.0235382	0.109607	MG	1.35329	0.002739	0.149998	MG
chr1:17226394-17226894	fat1a	0.396154219555151	fat1a::Inter	1.45427	0.279546	0.0312577	MG	4.11433	0.00476207	0.0947027	MG
chr1:17376652-17377152	fat1a	0.833042551503773	fat1a::TSS	1.16728	0.0111463	0.126177	MG	1.13802	0.0278118	0.132982	MG
chr1:17634914-17635414	sorbs2a	0.603407008657706	sorbs2a::Inter	1.42128	0.273162	0.0385903	MG	1.2433	0.177299	0.0622154	MG
chr1:17827236-17827736	sorbs2a	0.832657221181615	sorbs2a::Inter	4.76674	1.41171e-09	0.273916	MG	4.9348	1.93835e-07	0.139728	MG
chr1:23783489-23783989	slit2	0.896692434023875	slit2::Body	1.5958	0.000308446	0.191755	MG	1.80311	1.52959e-05	0.231204	MG
chr1:23784749-23785249	slit2	0.677532257702645	slit2::TSS	2.11071	0.0302774	0.0751022	MG	1.54586	0.14511	0.0728649	MG
chr1:23800696-23801196	slit2	0.698696901818827	slit2::Body	0.946659	0.180027	0.0476309	MG	3.94306	0.000158246	0.17062	MG
chr1:23813845-23814345	slit2	0.808785438645388	slit2::Body	3.11382	2.06819e-05	0.198362	MG	3.34405	0.000965494	0.104699	MG
chr1:23814448-23814948	slit2	0.680989624617875	slit2::Body	3.68037	0.1262	0.0428809	MG	4.30965	0.0260605	0.0378883	MG
chr1:23998643-23999143	slit2	0.508853690843459	slit2::Inter	1.34794	0.131678	0.034928	MG	2.77271	0.0852823	0.0598103	MG
chr1:24029053-24029553	slit2	0.751689166630353	slit2::Inter	4.24175	3.63627e-17	0.500587	MG	1.87854	0.0031515	0.167608	MG
chr1:34426767-34427267	lmo7b	0.89714238180395	lmo7b::Body	4.07955	0.000240838	0.139556	MG	3.48999	2.04161e-06	0.127133	MG
chr1:34428763-34429263	lmo7b	0.861877385891513	lmo7b::Body	3.09257	0.0126025	0.0756758	MG	5.62637	6.9296e-06	0.0973793	MG
chr1:34433230-34433730	lmo7b	0.470772568430307	lmo7b::Body	2.99421	0.0182127	0.0649271	MG	3.14012	0.000620926	0.0968542	MG
chr1:344489-344989	pros1	ND	pros1::TSS	3.29563	0.279546	0.0177452	MG	3.27436	0.242658	0.0174561	MG
chr1:34450475-34450975	lmo7b	0.62033596974717	lmo7b::TSS	2.80691	5.08502e-05	0.157566	MG	0.734751	0.222033	0.0278621	MG
chr1:34465709-34466209	lmo7b	0.666453632805936	lmo7b::Inter	2.88264	6.52483e-06	0.169415	MG	4.996	0.00296971	0.0621961	MG
chr1:353683-354183	pros1	0.739053419459401	pros1::TSS	1.10413	0.00459588	0.1548	MG	1.09991	0.0235435	0.0873044	MG
chr1:35479690-35480190	gab1	0.520472601404305	gab1::Inter	2.21547	0.0911452	0.0414009	MG	5.63219	0.000477623	0.0977816	MG
chr1:35511318-35511818	gab1	0.720481448619024	gab1::Body	1.87154	0.00992224	0.18017	MG	4.71689	0.0112447	0.0509016	MG
chr1:35514334-35514834	gab1	0.378074611532856	gab1::Body	3.24491	0.0248203	0.0578131	MG	3.35493	0.0391242	0.0659491	MG
chr1:35698035-35698535	gab1	0.622757548159605	gab1::Inter;smad1::Inter	0.92225	0.194298	0.116282	MG	0.995037	0.00241127	0.185615	MG
chr1:35698035-35698535	smad1	0.622757548159605	gab1::Inter;smad1::Inter	0.92225	0.194298	0.116282	MG	0.995037	0.00241127	0.185615	MG
chr1:35928758-35929258	smad1	0.788307604593502	smad1::TSS	2.2975	0.000174525	0.265665	MG	1.30809	0.000891507	0.172677	MG
chr1:36782061-36782561	nr3c2	0.318016372253522	nr3c2::Inter	1.47537	0.28692	0.0480461	MG	1.5233	0.0920128	0.0659761	MG
chr1:36785711-36786211	nr3c2	0.575292469682799	nr3c2::Inter	3.89318	0.000135071	0.120033	MG	1.98492	0.211871	0.0395709	MG
chr1:37063304-37063804	nr3c2	0.666392829371709	nr3c2::Body	1.89563	0.18453	0.0729272	MG	2.19987	0.00189845	0.126203	MG
chr1:37065272-37065772	nr3c2	0.629394421122232	nr3c2::Body	3.33793	0.00780982	0.0743275	MG	2.2522	0.286902	0.0244725	MG
chr1:37068825-37069325	nr3c2	0.557904407582952	nr3c2::Body	1.06684	0.21488	0.0487291	MG	2.03598	0.0125846	0.0695797	MG
chr1:37069560-37070060	nr3c2	0.42472935021867	nr3c2::Body	2.73175	0.0131427	0.085914	MG	1.88514	0.121897	0.0265644	MG
chr1:37072959-37073459	nr3c2	0.63452588921943	nr3c2::Body	1.07384	0.223401	0.0393429	MG	6.79944	1.50219e-09	0.222108	MG
chr1:37086528-37087028	nr3c2	0.706579974768227	nr3c2::TSS	1.37743	0.202618	0.0756858	MG	1.87247	0.00405814	0.074078	MG
chr1:41210323-41210823	rgs12b	0.711757280257335	rgs12b::Body	2.60194	0.0791676	0.073893	MG	2.68705	0.000573621	0.125282	MG
chr1:41212011-41212511	rgs12b	0.63924711783888	rgs12b::Body	3.14795	0.0415645	0.0391427	MG	1.8662	0.0263145	0.069769	MG
chr1:41212548-41213048	rgs12b	0.912527257292938	rgs12b::Body	2.8784	2.60072e-11	0.33472	MG	3.73441	1.91283e-17	0.513524	MG
chr1:41216571-41217071	rgs12b	0.573206237029391	rgs12b::Body	1.99943	0.0421261	0.0562	MG	3.82278	1.49347e-05	0.144361	MG
chr1:41259351-41259851	rgs12b	0.687746121507072	rgs12b::TSS	2.89354	0.0276938	0.0426171	MG	4.02702	0.0391242	0.0307898	MG
chr1:41260124-41260624	rgs12b	0.898924110501338	rgs12b::TSS	2.73858	5.50287e-12	0.480723	MG	3.28658	1.83836e-19	0.446911	MG
chr1:41270568-41271068	rgs12b	0.665861883549581	rgs12b::Body	2.89782	0.0903315	0.0683767	MG	1.96039	0.286902	0.0212027	MG
chr1:41276686-41277186	rgs12b	0.708961542574921	rgs12b::Body	4.82619	0.0158801	0.0889192	MG	2.94506	0.120071	0.0571378	MG
chr1:41796737-41797237	rnf24	0.768683390455173	rnf24::Body	3.78769	0.00145029	0.125811	MG	3.20684	0.118254	0.0446332	MG
chr1:41797408-41797908	rnf24	0.667259989448682	rnf24::Body	3.82423	0.00313954	0.0747353	MG	2.93873	0.163175	0.047627	MG
chr1:41817567-41818067	rnf24	ND	rnf24::TSS	0.586169	0.278239	0.0509224	MG	0.402085	0.34296	0.0527627	MG
chr1:41819903-41820403	rnf24	0.59587618057398	rnf24::Inter	2.12031	6.72575e-05	0.29131	MG	2.94988	8.15994e-11	0.30122	MG
chr1:52014404-52014904	nfixa	0.62201271815497	nfixa::Body	2.49411	0.000300985	0.19821	MG	3.97227	1.66612e-05	0.136434	MG
chr1:52048164-52048664	nfixa	0.376777988306591	nfixa::Body	1.61429	0.00805929	0.229083	MG	3.18891	0.0781146	0.0371997	MG
chr1:52560275-52560775	abca1a	0.70703843850014	abca1a::TSS	1.19867	0.00755449	0.163959	MG	1.22518	0.286902	0.0943324	MG
chr1:5257343-5257843	spry2	0.493191148632689	spry2::Inter	4.60526	0.00755449	0.0469617	MG	3.09981	0.22082	0.0298764	MG
chr1:52583010-52583510	abca1a	0.592966504069018	abca1a::Body	1.58586	0.0657804	0.0610404	MG	2.73514	4.28722e-05	0.137726	MG
chr1:5273195-5273695	spry2	0.76491379000913	spry2::TSS	1.01586	0.00074685	0.342748	MG	0.631237	0.0532578	0.14495	MG
chr1:6014441-6014941	pard3ba	0.566055389177825	pard3ba::Body	1.4317	0.0755334	0.0583803	MG	1.53228	0.0317797	0.111147	MG
chr1:6054222-6054722	pard3ba	0.532708132188874	pard3ba::Inter	1.91906	0.0636434	0.0477598	MG	2.72929	0.000189183	0.144681	MG
chr1:6084672-6085172	pard3ba	0.47866020912474	pard3ba::TSS	2.43799	0.000828062	0.224892	MG	1.50373	0.00238534	0.106835	MG
chr1:6085479-6085979	pard3ba	0.592698885591826	pard3ba::TSS	1.92048	0.0129813	0.0653213	MG	5.20155	0.000117877	0.0720279	MG
chr1:6099073-6099573	pard3ba	0.457450626784676	pard3ba::Inter	3.9919	0.0960388	0.0300009	MG	5.89772	7.44083e-05	0.117948	MG
chr10:1133038-1133538	bmpr1bb	0.660040292369974	bmpr1bb::TSS	2.35	0.0023978	0.215298	MG	1.39346	0.161848	0.0932368	MG
chr10:1146932-1147432	bmpr1bb	0.813502404202938	bmpr1bb::Body	4.50988	8.22262e-05	0.235118	MG	2.11713	0.0560865	0.0922193	MG
chr10:1148227-1148727	bmpr1bb	0.874003534452843	bmpr1bb::Body	2.62119	7.97998e-05	0.255526	MG	4.37304	6.47528e-15	0.417068	MG
chr10:13372523-13373023	il11ra	0.622235420216732	il11ra::Body	3.49829	0.00207629	0.0728962	MG	3.87119	0.177299	0.0274313	MG
chr10:13385685-13386185	il11ra	0.736286987386283	il11ra::Body	1.89305	8.86317e-05	0.170564	MG	2.43902	0.223723	0.0289234	MG
chr10:13396504-13397004	il11ra	0.493002107971332	il11ra::TSS	1.51409	0.146888	0.0760304	MG	3.94916	0.00198307	0.100344	MG
chr10:15495974-15496474	erbin	0.736395823748565	erbin::Body	1.28598	0.0600684	0.120472	MG	1.18984	0.000308493	0.239391	MG
chr10:16495339-16495839	CT027815.1	0.807076722097207	CT027815.1::TSS	0.618072	0.0530787	0.0530322	MG	1.14453	0.0743563	0.136925	MG
chr10:17719393-17719893	phf24	0.726543917730025	phf24::Inter	2.95427	3.97857e-10	0.329806	MG	2.18956	0.0151902	0.132718	MG
chr10:17850719-17851219	phf24	0.695902210895134	phf24::TSS	1.46583	1.68478e-05	0.154411	MG	2.08116	0.00109668	0.167509	MG
chr10:17851553-17852053	phf24	0.695051676149067	phf24::TSS	0.820475	0.247469	0.100607	MG	1.50954	0.00737298	0.14458	MG
chr10:17874065-17874565	phf24	0.834721186092373	phf24::Body	4.26027	3.40715e-10	0.33981	MG	5.04559	0.00296971	0.0644412	MG
chr10:17902471-17902971	phf24	0.537445814148843	phf24::Body	1.90774	0.180027	0.03081	MG	3.81707	0.0228893	0.0532603	MG
chr10:18092184-18092684	phf24	0.709492337960675	phf24::Inter	3.32889	0.056953	0.0485272	MG	5.40814	0.000117877	0.0834266	MG
chr10:20468495-20468995	tacc1	0.929067417612677	tacc1::Body	3.12903	6.26366e-13	0.445206	MG	4.80967	9.43764e-13	0.319897	MG
chr10:20469062-20469562	tacc1	0.808056969199185	tacc1::Body	2.45722	0.000979899	0.138767	MG	3.59859	0.000529477	0.086785	MG
chr10:20479789-20480289	tacc1	0.816644234239025	tacc1::Body	2.64668	2.08668e-05	0.182497	MG	5.4092	0.00029931	0.0834899	MG
chr10:20481874-20482374	tacc1	0.785289614907084	tacc1::TSS	0.993748	0.000248518	0.327702	MG	2.16365	9.60761e-10	0.404874	MG
chr10:20482442-20482942	tacc1	0.391002241491829	tacc1::TSS	1.51862	0.245287	0.0350067	MG	2.97853	0.035136	0.0378331	MG
chr10:20503084-20503584	tacc1	0.774652455030347	tacc1::Inter	2.10065	0.00493983	0.108022	MG	1.96811	0.00628824	0.0648203	MG
chr10:24314523-24315023	inpp5kb	0.678823513949108	inpp5kb::Body	2.19784	3.23184e-06	0.310288	MG	2.1267	2.59883e-10	0.412728	MG
chr10:24316559-24317059	inpp5kb	0.698497102171696	inpp5kb::Body	1.27692	0.0110781	0.14722	MG	2.47419	0.000323031	0.123808	MG
chr10:24319324-24319824	inpp5kb	0.556516375614973	inpp5kb::TSS	2.74697	0.0421261	0.0448752	MG	2.60391	0.0127191	0.127059	MG
chr10:24381668-24382168	slc43a2b	0.819959771755395	slc43a2b::Body	2.52216	6.45753e-10	0.302505	MG	6.63783	4.13902e-09	0.198356	MG
chr10:24391550-24392050	slc43a2b	0.929662165146334	slc43a2b::TSS	1.76035	3.68647e-09	0.253061	MG	2.26995	0.000528806	0.108049	MG
chr10:24392379-24392879	slc43a2b	0.783277142919513	slc43a2b::TSS	1.47205	0.0275614	0.0683895	MG	4.46541	0.0391242	0.0424374	MG
chr10:24474413-24474913	inpp5kb	0.706151937958276	inpp5kb::Inter	2.76402	2.52272e-06	0.354719	MG	5.11718	7.32077e-08	0.183194	MG
chr10:28587130-28587630	cblb	0.691109839661941	cblb::TSS	1.12749	0.00186273	0.22792	MG	0.865352	0.00586009	0.157796	MG
chr10:28834105-28834605	alcama	0.623278518849089	alcama::Body	1.77217	0.0275517	0.0677616	MG	1.66625	0.00222791	0.147792	MG
chr10:28835555-28836055	alcama	0.661818362099747	alcama::TSS	1.39766	0.0165829	0.126772	MG	1.43951	0.000799878	0.181401	MG
chr10:28847277-28847777	alcama	0.582499214789486	alcama::Inter	1.9562	0.249204	0.0301846	MG	4.42478	0.000422505	0.093509	MG
chr10:29008400-29008900	alcama	0.654925392936704	alcama::Inter	5.89575	2.8491e-05	0.117784	MG	6.66505	1.50219e-09	0.202173	MG
chr10:30903673-30904173	opcml	0.848314867693988	opcml::Inter	2.0544	0.000119351	0.285901	MG	1.67581	2.03092e-07	0.310917	MG
chr10:40937973-40938473	bmp1b	0.80791946539933	bmp1b::TSS	5.26653	0.000766872	0.075439	MG	1.48182	0.286902	0.0282346	MG
chr10:40939029-40939529	bmp1b	0.805039137317938	bmp1b::TSS	2.93604	1.23363e-05	0.157467	MG	3.59225	3.71879e-08	0.193851	MG
chr10:42589197-42589697	fgfr1b	0.864332651332421	fgfr1b::TSS	3.20121	0.000278394	0.111663	MG	1.48328	0.145868	0.0865844	MG
chr10:43510622-43511122	si:ch73-215f7.1	0.869608869836084	si:ch73-215f7.1::Body	1.44701	1.80171e-06	0.406657	MG	1.3789	2.13035e-08	0.47789	MG
chr10:43540501-43541001	si:ch73-215f7.1	0.430337670972732	si:ch73-215f7.1::TSS	0.857327	0.209435	0.0609837	MG	1.04861	0.0322648	0.143131	MG
chr10:43755454-43755954	si:ch73-215f7.1	0.449252894307773	si:ch73-215f7.1::Inter	3.4123	0.279546	0.0194094	MG	3.48958	0.125737	0.0205882	MG
chr10:5871421-5871921	tln1	0.602795554380039	tln1::Inter	1.79522	0.0983674	0.0718019	MG	1.64431	0.286902	0.0292553	MG
chr10:5904083-5904583	tln1	0.699526383962976	tln1::Inter	1.05067	0.090629	0.148841	MG	0.959172	0.160287	0.13761	MG
chr10:5925485-5925985	tln1	0.677932713040957	tln1::Inter	2.18954	0.000177032	0.237073	MG	3.29294	2.15686e-12	0.32422	MG
chr10:5931929-5932429	tln1	0.57902398046901	tln1::Inter	1.75121	0.0547735	0.0674037	MG	2.62448	1.43443e-05	0.18043	MG
chr10:5934462-5934962	tln1	0.590744677321868	tln1::Inter	2.1362	0.00783614	0.164849	MG	3.07338	4.3905e-09	0.218122	MG
chr10:5941487-5941987	tln1	0.539237368774651	tln1::Inter	3.2248	0.062026	0.0689791	MG	3.47152	0.242658	0.0203069	MG
chr10:883163-883663	bmpr1bb	0.579412202364009	bmpr1bb::Inter	1.77912	0.0182347	0.223879	MG	0.533339	0.286902	0.0610691	MG
chr10:8967960-8968460	fstb	0.871099526852596	fstb::TSS	0.946782	0.101205	0.0518003	MG	3.75789	0.0573634	0.0723403	MG
chr10:8988553-8989053	fstb	0.746446056764915	fstb::Inter	3.19717	0.0621377	0.0561644	MG	6.81839	4.13902e-09	0.22507	MG
chr10:932688-933188	bmpr1bb	0.5101243307055	bmpr1bb::Inter	2.65016	0.00217921	0.0544965	MG	3.51456	0.00147353	0.117372	MG
chr11:14527671-14528171	BX571942.1	0.467889630995287	BX571942.1::Inter	2.09417	0.00115849	0.116303	MG	5.01443	1.03412e-08	0.222079	MG
chr11:14565061-14565561	BX571942.1	0.428239595334174	BX571942.1::Inter	1.46278	0.0212291	0.147962	MG	3.18124	7.61564e-08	0.201278	MG
chr11:1628294-1628794	lrp1aa	0.725653145108609	lrp1aa::TSS	1.5102	0.0540107	0.148223	MG	1.69793	0.0244659	0.124802	MG
chr11:18702117-18702617	id1	0.742111748160993	id1::Inter	1.09028	0.0187256	0.0599748	MG	2.19151	6.4392e-05	0.147128	MG
chr11:18702762-18703262	id1	0.858391200715517	id1::Inter	2.33275	7.39577e-08	0.304119	MG	2.55263	1.01621e-12	0.352141	MG
chr11:18703459-18703959	id1	0.893152471010028	id1::TSS	3.13668	7.37414e-05	0.135949	MG	3.41085	4.39044e-06	0.161656	MG
chr11:18704398-18704898	id1	0.787301467079263	id1::TSS	2.03299	1.2933e-05	0.254305	MG	0.681208	0.10029	0.0723259	MG
chr11:18705095-18705595	id1	0.883721986573525	id1::TSS	1.38826	9.55294e-09	0.526377	MG	1.16452	8.29105e-10	0.647207	MG
chr11:18706654-18707154	id1	0.890725427231877	id1::TSS	1.68285	6.75403e-10	0.486073	MG	1.17449	1.73756e-07	0.471006	MG
chr11:18707383-18707883	id1	0.887352720931143	id1::Inter	1.37621	2.94006e-06	0.314464	MG	1.36687	8.99424e-10	0.506062	MG
chr11:20370899-20371399	cdh4	0.61009956235462	cdh4::TSS	1.75791	0.270516	0.0610807	MG	2.14653	0.0232927	0.0825107	MG
chr11:20372203-20372703	cdh4	0.700708714689877	cdh4::TSS	1.4187	0.0424262	0.0517817	MG	3.05232	0.00332625	0.1321	MG
chr11:20503163-20503663	cdh4	0.800986837703924	cdh4::Body	2.11231	5.96223e-05	0.170479	MG	2.25474	6.32124e-06	0.158642	MG
chr11:20547446-20547946	cdh4	0.777438714398369	cdh4::Body	1.91135	0.0533156	0.0949963	MG	3.75495	0.025953	0.0719566	MG
chr11:23467833-23468333	nfasca	0.708383859882881	nfasca::Inter;pik3c2b::Inter	1.39415	0.0421261	0.0839422	MG	1.85155	0.122071	0.0599887	MG
chr11:23467833-23468333	pik3c2b	0.708383859882881	nfasca::Inter;pik3c2b::Inter	1.39415	0.0421261	0.0839422	MG	1.85155	0.122071	0.0599887	MG
chr11:23468335-23468835	nfasca	0.779039610086543	nfasca::Inter;pik3c2b::Inter	2.35964	0.000113545	0.20348	MG	2.68985	0.000707143	0.103595	MG
chr11:23468335-23468835	pik3c2b	0.779039610086543	nfasca::Inter;pik3c2b::Inter	2.35964	0.000113545	0.20348	MG	2.68985	0.000707143	0.103595	MG
chr11:23821062-23821562	nfasca	0.730029449278648	nfasca::Body	2.95694	0.00107786	0.105808	MG	2.71386	1.23306e-05	0.112121	MG
chr11:23821647-23822147	nfasca	0.87727598101003	nfasca::Body	4.30465	8.31278e-17	0.539849	MG	6.34576	8.90628e-20	0.421913	MG
chr11:23829783-23830283	nfasca	0.856325065202256	nfasca::Body	2.54455	0.00275124	0.159423	MG	1.70812	0.00110779	0.083074	MG
chr11:23830399-23830899	nfasca	0.659816270684826	nfasca::Body	2.6831	0.0276938	0.0590259	MG	1.8248	0.286902	0.0157029	MG
chr11:27968545-27969045	alpl	0.692673999400087	alpl::TSS	0.264704	0.279546	0.048009	MG	1.9551	0.000128678	0.215101	MG
chr11:28370555-28371055	ephb2b	0.71933718715427	ephb2b::Body	2.43066	2.8731e-08	0.378313	MG	1.40977	3.74847e-05	0.297354	MG
chr11:28382816-28383316	ephb2b	0.568758473402407	ephb2b::Body	2.71565	8.02519e-05	0.179043	MG	3.93749	3.61065e-06	0.16824	MG
chr11:34745061-34745561	gnai2a	0.575545816512341	gnai2a::Inter	4.23675	0.000426172	0.0821784	MG	3.1704	0.242658	0.0161025	MG
chr11:34807923-34808423	gnai2a	0.527809661645005	gnai2a::Inter;slc38a3a::Inter	2.95336	0.0215524	0.144858	MG	3.2565	0.22082	0.0438088	MG
chr11:34807923-34808423	slc38a3a	0.527809661645005	gnai2a::Inter;slc38a3a::Inter	2.95336	0.0215524	0.144858	MG	3.2565	0.22082	0.0438088	MG
chr11:34817631-34818131	gnai2a	0.835557838584134	gnai2a::Inter	2.24487	5.95999e-10	0.519449	MG	2.34407	1.49232e-13	0.472265	MG
chr11:34834497-34834997	slc38a3a	0.372639809500712	slc38a3a::Body	1.80385	2.78701e-05	0.249249	MG	1.13044	0.00371714	0.171803	MG
chr11:34851918-34852418	slc38a3a	0.448823617371148	slc38a3a::Body	0.256074	0.247469	0.0291843	MG	4.55054	2.94116e-06	0.153354	MG
chr11:34852559-34853059	slc38a3a	0.447685699631872	slc38a3a::Body	1.47498	0.000118362	0.205995	MG	4.53709	1.26243e-13	0.275348	MG
chr11:34933934-34934434	gnai2a	0.836843693222966	gnai2a::Body	1.60055	0.141938	0.0796213	MG	1.4153	0.0711186	0.101111	MG
chr11:34946761-34947261	gnai2a	0.705339878095578	gnai2a::Body	1.67764	0.0601803	0.0712563	MG	2.74571	0.0119245	0.0526617	MG
chr11:35550075-35550575	sema3fb	0.334919683739879	sema3fb::Body	1.39421	0.0590172	0.0458292	MG	5.18263	0.00296971	0.0710632	MG
chr11:35575608-35576108	sema3fb	0.65491983074585	sema3fb::TSS	1.6573	0.00239543	0.208494	MG	1.35864	0.0066314	0.140869	MG
chr11:35778039-35778539	sema3fb	0.662009016268674	sema3fb::Inter	2.92914	0.00797937	0.0718749	MG	4.81944	0.0112447	0.0547997	MG
chr11:36060146-36060646	sort1a	0.619031871416278	sort1a::Inter	3.87715	0.00228939	0.156037	MG	1.72217	0.212308	0.0387974	MG
chr11:36157189-36157689	grm2b	ND	grm2b::TSS	2.6211	0.279546	0.0103665	MG	2.30541	0.22082	0.0229851	MG
chr11:36158033-36158533	grm2b	0.880663754549306	grm2b::TSS	4.4425	0.000147287	0.185392	MG	4.03553	6.40649e-06	0.117482	MG
chr11:36158546-36159046	grm2b	0.818604538546612	grm2b::Body	4.06702	0.00324057	0.104297	MG	4.59438	0.00723672	0.0465939	MG
chr11:36192361-36192861	grm2b	0.596133884283145	grm2b::Body	2.94501	0.00366942	0.069036	MG	3.85996	5.25305e-06	0.152797	MG
chr11:36192905-36193405	grm2b	0.46504618363048	grm2b::Body	1.51213	0.247469	0.0123358	MG	4.34937	0.0112447	0.0390022	MG
chr11:36220311-36220811	sypl2a	0.569446163420579	sypl2a::Inter	2.39919	0.186438	0.0605226	MG	3.90188	0.014957	0.0631847	MG
chr11:36319543-36320043	sort1a	0.710279464726973	sort1a::Body	1.09228	0.00115897	0.17374	MG	1.98247	1.09823e-08	0.331419	MG
chr11:36355073-36355573	sypl2a	0.586468530445323	sypl2a::TSS	2.11056	0.0136752	0.0519271	MG	1.2943	0.226353	0.0390474	MG
chr11:37521263-37521763	sox13	0.717852800759307	sox13::Inter	2.7346	0.00234734	0.130834	MG	4.83809	7.48354e-06	0.143487	MG
chr11:37526529-37527029	sox13	0.827272218625767	sox13::Inter	2.22523	4.53457e-09	0.311761	MG	3.68773	5.94095e-13	0.384122	MG
chr11:37527093-37527593	sox13	0.746615960122791	sox13::Inter	2.84284	4.84263e-06	0.129402	MG	2.14456	0.0391242	0.0723402	MG
chr11:37600011-37600511	sox13	0.588180187193814	sox13::Inter	1.53675	0.130289	0.0868092	MG	2.3675	0.00173917	0.146934	MG
chr11:37747363-37747863	sox13	0.866093919554694	sox13::Inter	1.55662	0.0184254	0.183565	MG	2.07964	2.90265e-08	0.283085	MG
chr11:37755298-37755798	sox13	0.66896316510074	sox13::Inter	2.29378	0.0924119	0.0320146	MG	5.61358	1.78585e-05	0.096502	MG
chr11:37768693-37769193	sox13	0.731184688913077	sox13::TSS	2.66967	0.0195092	0.0423303	MG	2.25994	0.165069	0.0309334	MG
chr11:37801194-37801694	sox13	0.699847653703298	sox13::Body	1.56746	0.221459	0.0267791	MG	2.22002	0.0948449	0.0663519	MG
chr11:38154932-38155432	CDK18	0.591884163128548	CDK18::Inter	1.05009	0.075556	0.11376	MG	3.36271	1.15116e-05	0.20212	MG
chr11:38162205-38162705	CDK18	0.377838313905137	CDK18::Inter	1.54145	0.0425769	0.138648	MG	2.90974	0.00011659	0.130451	MG
chr11:38280110-38280610	CDK18	0.625978379396097	CDK18::TSS	1.09124	0.2875	0.198898	MG	1.41518	0.00828559	0.102967	MG
chr11:38305282-38305782	CDK18	0.496785255984713	CDK18::Body	1.09936	0.282731	0.0547519	MG	2.40466	0.0511097	0.104793	MG
chr11:38315985-38316485	CDK18	0.692041181462247	CDK18::Body	4.42026	3.53443e-06	0.230216	MG	1.94396	0.0034112	0.0649451	MG
chr11:38329158-38329658	CDK18	0.673106964533085	CDK18::Body	3.05835	7.07466e-05	0.150228	MG	3.62242	0.017183	0.065402	MG
chr11:42038478-42038978	ENSDARG00000098374	0.536442072081412	ENSDARG00000098374::Inter	1.90537	0.0385618	0.13874	MG	1.20644	0.000291835	0.205946	MG
chr11:42047489-42047989	ENSDARG00000098374	0.559742761517059	ENSDARG00000098374::Inter	2.09308	0.0421261	0.059467	MG	1.58243	2.05328e-05	0.229405	MG
chr11:42056389-42056889	ENSDARG00000098374	0.372199804922353	ENSDARG00000098374::Inter	2.73361	0.279546	0.0113706	MG	1.50592	0.0855506	0.128614	MG
chr11:42060799-42061299	ENSDARG00000098374	0.561746982550302	ENSDARG00000098374::Inter	1.79979	0.0960388	0.097267	MG	2.16802	0.0281784	0.070856	MG
chr11:42197317-42197817	ENSDARG00000098374	0.554597515925881	ENSDARG00000098374::Inter	1.8286	0.054039	0.077411	MG	1.15327	0.242812	0.0642977	MG
chr11:42205872-42206372	ENSDARG00000098374	0.648399746606549	ENSDARG00000098374::Inter	1.71489	0.00455863	0.14559	MG	4.47474	0.00066475	0.0917461	MG
chr11:42247699-42248199	ENSDARG00000098374	0.527192574187857	ENSDARG00000098374::Inter	3.3706	0.0276938	0.0547332	MG	5.74643	4.65454e-05	0.106005	MG
chr11:42251492-42251992	ENSDARG00000098374	0.499540265929664	ENSDARG00000098374::Inter	2.71224	0.240648	0.0503633	MG	3.78403	0.0523198	0.0439448	MG
chr11:42292470-42292970	ENSDARG00000098374	0.744807296306896	ENSDARG00000098374::Inter	1.14813	0.00292241	0.163415	MG	3.31261	7.41964e-07	0.164747	MG
chr11:45158383-45158883	syngr2b	0.35947731599852	syngr2b::Inter	1.92222	0.303911	0.0270356	MG	0.975538	0.114306	0.039069	MG
chr11:45168640-45169140	syngr2b	0.757371070151437	syngr2b::Body	1.38957	0.0960388	0.0898132	MG	1.98128	0.0851816	0.0504735	MG
chr11:45170381-45170881	syngr2b	ND	syngr2b::TSS	0.687151	0.223859	0.0117004	MG	2.72674	0.0178752	0.0422721	MG
chr11:45170987-45171487	syngr2b	0.802900053666744	syngr2b::TSS	1.11229	0.00595738	0.219209	MG	1.69412	3.11169e-05	0.312531	MG
chr12:1068274-1068774	sox8a	0.620160500977966	sox8a::Inter	1.05387	0.132512	0.0300885	MG	4.60957	0.017183	0.0471083	MG
chr12:1085018-1085518	sox8a	0.867144168424617	sox8a::TSS	2.54788	7.26437e-10	0.380995	MG	3.62288	1.49321e-08	0.182865	MG
chr12:23175538-23176038	bambia	0.525648052798575	bambia::Inter	2.23089	0.0025452	0.0744496	MG	3.88816	0.177299	0.0277796	MG
chr12:23512922-23513422	jcada	0.435979593736437	jcada::Inter	0.963706	0.296012	0.0281427	MG	2.43169	0.00012082	0.114415	MG
chr12:23513570-23514070	jcada	0.709388956661744	jcada::Inter	1.84826	4.60847e-12	0.395698	MG	1.39418	2.27181e-09	0.355343	MG
chr12:23514221-23514721	jcada	0.635768584269016	jcada::Inter	3.10781	0.042099	0.0614498	MG	1.74325	0.0526196	0.0579425	MG
chr12:23566766-23567266	bambia	0.821351259345506	bambia::Inter;jcada::Inter	2.49325	4.28649e-10	0.370736	MG	3.15721	4.22771e-09	0.259117	MG
chr12:23566766-23567266	jcada	0.821351259345506	bambia::Inter;jcada::Inter	2.49325	4.28649e-10	0.370736	MG	3.15721	4.22771e-09	0.259117	MG
chr12:23628479-23628979	bambia	0.68491872005642	bambia::Inter;jcada::Inter	0.946009	0.180027	0.0275112	MG	3.38432	0.0781146	0.0438192	MG
chr12:23628479-23628979	jcada	0.68491872005642	bambia::Inter;jcada::Inter	0.946009	0.180027	0.0275112	MG	3.38432	0.0781146	0.0438192	MG
chr12:23673013-23673513	bambia	0.435496838688798	bambia::Inter	1.54978	0.000696313	0.100026	MG	1.07782	0.0180525	0.0957338	MG
chr12:23762847-23763347	jcada	0.897968243625729	jcada::TSS	2.04318	0.000204368	0.201876	MG	2.28275	0.00912405	0.124075	MG
chr12:30046089-30046589	ablim1b	0.676391457094819	ablim1b::TSS	1.1646	0.0884455	0.128085	MG	1.2981	0.0391968	0.0749226	MG
chr12:30062653-30063153	ablim1b	0.641044627171574	ablim1b::Body	1.46377	0.000275726	0.207757	MG	3.49321	3.51612e-10	0.280263	MG
chr12:30089354-30089854	ablim1b	0.673667425732321	ablim1b::Body	2.97351	0.00157195	0.121187	MG	2.81682	0.002456	0.0716004	MG
chr12:30089900-30090400	ablim1b	0.636746353837865	ablim1b::Body	3.69351	0.000243549	0.119004	MG	5.03685	0.000163999	0.116957	MG
chr12:30146351-30146851	ablim1b	0.700858677450859	ablim1b::Body	4.85649	8.84048e-13	0.381176	MG	3.00516	1.2299e-07	0.209908	MG
chr12:30146910-30147410	ablim1b	0.420164182453293	ablim1b::Body	0.936007	0.279546	0.0681911	MG	3.59531	2.73793e-07	0.204687	MG
chr12:30148869-30149369	ablim1b	0.71479665791103	ablim1b::Body	0.994	0.180027	0.0540308	MG	2.66279	0.161848	0.028404	MG
chr12:30223818-30224318	ablim1b	0.605014436764025	ablim1b::Inter;BX465198.2::Inter	2.20443	2.05501e-05	0.139765	MG	3.29675	0.0151786	0.0454443	MG
chr12:30223818-30224318	BX465198.2	0.605014436764025	ablim1b::Inter;BX465198.2::Inter	2.20443	2.05501e-05	0.139765	MG	3.29675	0.0151786	0.0454443	MG
chr12:30902990-30903490	tcf7l2	0.669762531941916	tcf7l2::Inter	1.59145	0.000524326	0.182634	MG	4.41423	6.71373e-07	0.160678	MG
chr12:30997765-30998265	tcf7l2	0.577537611886929	tcf7l2::Body	3.85068	5.80942e-08	0.216491	MG	3.59393	1.01217e-15	0.393304	MG
chr12:31012308-31012808	tcf7l2	0.61204484594655	tcf7l2::TSS	1.96309	0.051408	0.171529	MG	1.06548	0.0524533	0.085344	MG
chr12:31080885-31081385	tcf7l2	0.733656624880639	tcf7l2::Body	2.48036	0.183796	0.0332162	MG	2.44689	0.210559	0.0656967	MG
chr12:31088059-31088559	tcf7l2	0.583731636933905	tcf7l2::Body	1.94991	0.130289	0.0331117	MG	2.07144	0.0860205	0.0438056	MG
chr12:31103177-31103677	tcf7l2	0.903440254951905	tcf7l2::TSS	1.9375	0.00245118	0.230493	MG	1.2018	0.00452078	0.217668	MG
chr12:33395420-33395920	fasn	0.540591507964609	fasn::TSS	0.957173	0.0318997	0.216396	MG	1.45283	0.000156299	0.18359	MG
chr12:33401834-33402334	fasn	0.38032082511719	fasn::Body	2.40741	0.0269938	0.196529	MG	5.1614	8.58867e-12	0.316347	MG
chr12:34753021-34753521	qki2	0.670200459165732	qki2::Inter	2.75327	0.000122091	0.182846	MG	3.51201	1.52853e-05	0.119335	MG
chr12:34753633-34754133	qki2	0.720256681562187	qki2::Inter	3.90128	3.66691e-06	0.148469	MG	2.43873	0.0185311	0.0635951	MG
chr12:34952932-34953432	qki2	0.817730279695461	qki2::TSS	1.48003	0.00342644	0.194883	MG	2.51797	8.12385e-06	0.211867	MG
chr12:34975253-34975753	qki2	0.898844884290547	qki2::Body	1.86429	3.18628e-05	0.175525	MG	2.87675	0.000293706	0.131384	MG
chr12:34985838-34986338	qki2	0.695383724918434	qki2::Body	2.07536	0.0129813	0.0853186	MG	2.01154	0.0131452	0.0731016	MG
chr12:35039033-35039533	qki2	0.756745946306833	qki2::Inter	1.70384	0.00200188	0.276971	MG	1.89153	0.286902	0.0303359	MG
chr12:35605992-35606492	chmp6b	0.657397256832625	chmp6b::Body	1.17933	0.00102914	0.219924	MG	1.04579	0.00375309	0.11461	MG
chr12:43398333-43398833	ptprea	0.563886322636937	ptprea::Body	2.12345	2.1643e-05	0.175619	MG	1.35197	4.04935e-06	0.29853	MG
chr12:43454801-43455301	ptprea	0.707497397370688	ptprea::Body	3.45735	0.000173586	0.226592	MG	2.26312	0.0583433	0.0539086	MG
chr12:43466014-43466514	ptprea	0.757213897226347	ptprea::Body	3.19262	9.53617e-12	0.496982	MG	3.29645	1.13805e-07	0.220363	MG
chr12:43575657-43576157	ptprea	0.653632135719022	ptprea::Body	1.65413	0.140083	0.04814	MG	1.60564	0.0566361	0.0819316	MG
chr12:44898855-44899355	dock1	0.408170906492043	dock1::Inter	2.26749	5.84963e-08	0.365294	MG	1.70751	2.00081e-07	0.229311	MG
chr12:44910439-44910939	dock1	0.34893836100481	dock1::Inter	3.08426	1.36315e-07	0.227743	MG	1.49443	0.0350449	0.0788386	MG
chr12:44919419-44919919	dock1	0.334590551252373	dock1::Inter	2.11073	7.37534e-05	0.143557	MG	3.03809	0.00828276	0.0913932	MG
chr12:44957098-44957598	dock1	0.317870930930856	dock1::Inter	3.18618	0.00514356	0.0803438	MG	2.33335	0.114671	0.0549315	MG
chr12:44968266-44968766	dock1	0.376883298405231	dock1::Inter	1.96295	0.000131142	0.18136	MG	2.86293	0.00164328	0.116383	MG
chr12:46608453-46608953	FADS6	0.65225449500457	FADS6::TSS	1.66328	0.000370092	0.13375	MG	1.83847	0.000224233	0.172278	MG
chr12:46621979-46622479	FADS6	0.894748299333182	FADS6::Body	3.11232	3.50995e-08	0.268182	MG	3.41771	9.90217e-16	0.398409	MG
chr12:4776710-4777210	arhgap27	0.818203684452835	arhgap27::Inter	3.35353	2.99767e-07	0.234909	MG	3.30788	3.56678e-05	0.114477	MG
chr12:4794824-4795324	arhgap27	0.758367639274587	arhgap27::Inter	0.73206	0.0490676	0.0790888	MG	2.19792	0.000606167	0.150755	MG
chr12:4990163-4990663	arhgap27	0.901983648637171	arhgap27::Body	2.92673	0.000120696	0.143768	MG	3.84989	3.34015e-05	0.105691	MG
chr12:4992842-4993342	arhgap27	0.906393430696953	arhgap27::Body	3.24371	6.5159e-13	0.400017	MG	4.22653	7.34252e-15	0.385845	MG
chr12:4995073-4995573	arhgap27	0.857143793923551	arhgap27::Body	5.06456	2.46006e-05	0.115875	MG	2.04098	0.22082	0.0363216	MG
chr12:4997518-4998018	arhgap27	0.943499399198689	arhgap27::Body	4.23385	8.67261e-20	0.64207	MG	7.39849	5.97272e-15	0.337465	MG
chr12:4998032-4998532	arhgap27	0.719981579378665	arhgap27::Body	3.38791	0.0160833	0.0503141	MG	2.95651	0.015384	0.0408799	MG
chr12:8143621-8144121	arid5b	0.737177065114987	arid5b::Inter	1.7054	0.141938	0.130946	MG	1.19188	0.318094	0.0556527	MG
chr12:8149007-8149507	arid5b	0.423492099411723	arid5b::Inter	0.706672	0.297686	0.0339801	MG	2.42797	0.0852823	0.0343638	MG
chr12:8169796-8170296	arid5b	ND	arid5b::TSS	4.56811	0.0421261	0.0457168	MG	2.31297	0.343623	0.0354034	MG
chr12:8271527-8272027	arid5b	0.709451148323453	arid5b::Body	1.36084	0.173872	0.0559389	MG	1.96908	0.224293	0.0277836	MG
chr12:8784154-8784654	cyp26a1	0.659880364892933	cyp26a1::Inter	1.95258	3.46698e-06	0.198957	MG	2.08853	0.000110929	0.160147	MG
chr12:8841942-8842442	cyp26a1	0.784621839826908	cyp26a1::Inter	2.32426	3.31674e-06	0.252547	MG	1.99443	0.0117636	0.107469	MG
chr12:8957604-8958104	cyp26a1	0.662063861430711	cyp26a1::TSS	2.15376	0.131856	0.0217511	MG	3.79771	0.0577096	0.0582485	MG
chr12:8958164-8958664	cyp26a1	0.892710725079637	cyp26a1::TSS	1.99708	0.00293302	0.134768	MG	3.06345	0.000274695	0.133038	MG
chr12:9060579-9061079	cyp26a1	0.582130990172195	cyp26a1::Inter	1.77899	0.000109783	0.212101	MG	3.40793	1.6319e-08	0.195634	MG
chr13:1155202-1155702	perp	0.861235101797871	perp::TSS	1.70825	0.00548892	0.140472	MG	1.47223	0.0751475	0.103025	MG
chr13:12527816-12528316	rrh	0.934025158980401	rrh::TSS	2.81273	3.29277e-07	0.257531	MG	3.07551	0.000633895	0.0932592	MG
chr13:16279026-16279526	anxa11a	0.509743700835958	anxa11a::TSS	0.696032	0.279546	0.0240832	MG	1.47529	0.286902	0.0698179	MG
chr13:16279629-16280129	anxa11a	0.659171883470878	anxa11a::TSS	0.938254	0.140648	0.124144	MG	1.55699	0.000717129	0.10441	MG
chr13:18815541-18816041	lzts2a	0.543159985910857	lzts2a::Body	3.39972	7.44887e-07	0.233933	MG	1.4118	0.318094	0.0314267	MG
chr13:18892872-18893372	lzts2a	0.389292721385174	lzts2a::Inter	0.950659	0.114612	0.0387781	MG	3.42615	0.0841523	0.066225	MG
chr13:21911733-21912233	ndst2a	0.784703812160086	ndst2a::Inter	1.78069	0.000107307	0.185612	MG	1.74142	0.00123834	0.19365	MG
chr13:22044848-22045348	ndst2a	0.774216552253535	ndst2a::Inter	2.24004	0.000781687	0.218815	MG	1.76633	0.0248117	0.0870951	MG
chr13:22476453-22476953	ldb3a	0.753385448777369	ldb3a::TSS	0.4972	0.141938	0.186444	MG	1.3455	0.00568181	0.168317	MG
chr13:22478541-22479041	ldb3a	0.402063743928337	ldb3a::TSS	3.14159	0.0855059	0.0973395	MG	2.36402	0.286902	0.0253696	MG
chr13:22598913-22599413	bmpr1aa	0.858866568567901	bmpr1aa::Body	1.15342	0.0276938	0.12286	MG	1.51479	0.00053082	0.232322	MG
chr13:22600630-22601130	bmpr1aa	0.905770769778629	bmpr1aa::Body	2.27337	4.35588e-13	0.606757	MG	1.33391	4.03084e-10	0.494363	MG
chr13:23020522-23021022	hk1	0.338149415492511	hk1::Inter	1.25597	0.174313	0.0388652	MG	2.02977	0.209002	0.0525595	MG
chr13:24319103-24319603	galnt2	0.517349452479121	galnt2::Inter	2.00547	0.0421261	0.115569	MG	2.18321	0.256299	0.0433803	MG
chr13:24355774-24356274	galnt2	0.580945230768045	galnt2::Inter	5.16909	0.000103822	0.165695	MG	3.65316	0.00311661	0.073391	MG
chr13:26835345-26835845	ccdc85a	0.66329958753438	ccdc85a::Inter	6.67315	8.92316e-08	0.203323	MG	3.15713	0.0117135	0.0671805	MG
chr13:26843780-26844280	ccdc85a	0.726591356053269	ccdc85a::Inter	2.35692	0.00103758	0.146626	MG	2.35532	0.0843041	0.0802089	MG
chr13:26876449-26876949	ccdc85a	0.370951264216691	ccdc85a::Inter	1.20341	0.274332	0.0501389	MG	4.53654	1.23506e-05	0.160257	MG
chr13:27038145-27038645	ccdc85a	0.812192103299822	ccdc85a::TSS	0.887119	0.0031434	0.280025	MG	1.33511	0.000444034	0.264541	MG
chr13:29559766-29560266	pax2a	0.789690822427543	pax2a::Inter	2.16322	9.10248e-08	0.314979	MG	3.28572	2.9222e-10	0.312289	MG
chr13:29571276-29571776	pax2a	0.727879925446174	pax2a::Inter	2.09044	0.00539843	0.10445	MG	1.63049	0.117463	0.113511	MG
chr13:29633353-29633853	pax2a	0.766598532418431	pax2a::Inter	1.56095	0.0199011	0.0443286	MG	3.61929	0.114306	0.0380879	MG
chr13:29770644-29771144	pax2a	0.75744151260466	pax2a::TSS	1.82673	0.00312549	0.166289	MG	0.84337	0.242658	0.131517	MG
chr13:29793544-29794044	pax2a	0.766742403605399	pax2a::Body	2.34237	0.168779	0.0526854	MG	2.14753	1.98199e-06	0.161973	MG
chr13:29797964-29798464	pax2a	0.812356156470448	pax2a::Body	1.63807	1.98341e-06	0.239339	MG	3.24944	1.7262e-07	0.222389	MG
chr13:29899446-29899946	pax2a	0.660851811517392	pax2a::Inter	3.24315	0.00147702	0.0958093	MG	1.40177	0.00572006	0.122711	MG
chr13:33398707-33399207	btbd6a	0.696928137260365	btbd6a::TSS	1.68196	0.0033958	0.179413	MG	1.4994	0.00580762	0.162069	MG
chr13:33408989-33409489	btbd6a	0.717391215620487	btbd6a::Inter	2.91803	2.36511e-07	0.276604	MG	5.42888	1.00398e-18	0.428118	MG
chr13:33412842-33413342	btbd6a	0.509287553619818	btbd6a::Inter	2.12389	0.000473862	0.21703	MG	3.07652	0.000626223	0.0994883	MG
chr13:33633545-33634045	btbd6a	0.495416462060569	btbd6a::Inter	1.75647	0.267318	0.0659675	MG	3.5548	0.125737	0.0216332	MG
chr13:34792564-34793064	ism1	0.558009703728789	ism1::TSS	2.39937	0.0197985	0.0647222	MG	0.980473	0.222879	0.0391702	MG
chr13:34793506-34794006	ism1	0.778278437096423	ism1::TSS	2.3839	0.00109629	0.100371	MG	3.02219	0.00160959	0.0930943	MG
chr13:34894924-34895424	ism1	0.604071931317368	ism1::Inter	1.66633	0.0633824	0.0335025	MG	2.34526	0.00378926	0.0961145	MG
chr13:34933920-34934420	ism1	0.84254639747492	ism1::Inter	4.81883	2.61451e-07	0.180758	MG	0.567615	0.0145416	0.0236295	MG
chr13:3548838-3549338	qkib	0.468477356782692	qkib::Inter	2.02547	0.12573	0.04932	MG	1.99007	0.286902	0.0344037	MG
chr13:3643585-3644085	qkib	0.756575267887222	qkib::Inter	4.24753	0.000437474	0.145165	MG	4.28018	0.00166482	0.0991671	MG
chr13:3648132-3648632	qkib	0.887460123875799	qkib::Inter	3.49521	2.23834e-09	0.254021	MG	4.84822	1.63692e-13	0.32621	MG
chr13:3666408-3666908	qkib	0.902481078828273	qkib::TSS	2.38408	1.43948e-07	0.259433	MG	4.48392	8.84649e-06	0.169135	MG
chr13:3668014-3668514	qkib	0.691400273104642	qkib::TSS	2.33142	0.183796	0.0385815	MG	1.77388	0.0583433	0.0472497	MG
chr13:3668806-3669306	qkib	0.416816862160545	qkib::Body	2.61426	0.180027	0.0481432	MG	5.10801	0.0046515	0.0673797	MG
chr13:36862800-36863300	pygl	0.925117073738639	pygl::TSS	2.47744	3.16239e-10	0.357371	MG	4.44563	8.50741e-14	0.385755	MG
chr13:3694761-3695261	qkib	0.699395443268114	qkib::Body	0.962826	0.115116	0.0835679	MG	2.68545	0.00113089	0.112529	MG
chr13:39235798-39236298	FRMD1	0.71251598084623	FRMD1::TSS	1.08803	0.133711	0.196838	MG	0.967186	0.318094	0.107027	MG
chr13:39251625-39252125	FRMD1	0.456066933715855	FRMD1::Body	1.07252	2.8439e-05	0.229109	MG	1.6103	5.21921e-07	0.284741	MG
chr13:40815447-40815947	prkg1a	0.622952631161398	prkg1a::TSS	1.4643	0.0155499	0.0683138	MG	2.27171	0.121053	0.0330447	MG
chr13:41999408-41999908	cyp1b1	0.870439270282794	cyp1b1::Inter	2.01926	0.0117654	0.137365	MG	2.5552	1.7096e-05	0.222832	MG
chr13:42011044-42011544	cyp1b1	0.706354830214551	cyp1b1::TSS	2.72865	0.0574159	0.0419213	MG	1.09813	0.0183594	0.0617396	MG
chr13:42160273-42160773	cyp1b1	0.559287037924267	cyp1b1::Inter	4.20162	0.000530393	0.155651	MG	3.2019	0.242658	0.0165024	MG
chr13:42724396-42724896	capn1a	0.707653151573109	capn1a::TSS	1.59352	0.00830361	0.111619	MG	1.52337	0.0283583	0.0607447	MG
chr13:4831723-4832223	mcu	0.612141289798946	mcu::Body	2.79801	0.0052	0.0819112	MG	1.99008	0.286902	0.0249875	MG
chr13:4847483-4847983	mcu	0.737973901868841	mcu::TSS	2.27619	0.00109594	0.250487	MG	1.81616	0.000719675	0.127534	MG
chr13:4848416-4848916	mcu	0.701118023498335	mcu::TSS	1.76879	2.15086e-05	0.161143	MG	1.59054	0.0012556	0.156074	MG
chr13:4848960-4849460	mcu	0.695033701965956	mcu::TSS	2.03334	9.56751e-10	0.425413	MG	1.83843	2.5732e-05	0.259282	MG
chr13:4878563-4879063	mcu	0.473799212623095	mcu::Inter;psap::Inter	1.93836	0.00137293	0.079672	MG	2.30245	0.121298	0.042144	MG
chr13:4878563-4879063	psap	0.473799212623095	mcu::Inter;psap::Inter	1.93836	0.00137293	0.079672	MG	2.30245	0.121298	0.042144	MG
chr13:5013408-5013908	psap	0.550049123241304	psap::TSS	2.85028	0.000123159	0.159062	MG	2.65877	0.0180081	0.068046	MG
chr13:50141976-50142476	nid1a	0.600897278891946	nid1a::Inter	1.21025	0.247469	0.0140659	MG	4.32223	0.0062695	0.0651015	MG
chr13:8443644-8444144	epas1b	0.911965325919646	epas1b::Body	2.07496	1.95457e-05	0.220449	MG	5.59794	0.000477623	0.0954404	MG
chr13:8446094-8446594	epas1b	0.867715304155813	epas1b::TSS	1.59051	0.00268295	0.180932	MG	1.57962	0.0308177	0.107957	MG
chr13:8632637-8633137	epas1b	0.744566197479726	epas1b::Inter	1.81797	0.00143342	0.110819	MG	1.87404	0.121298	0.0310546	MG
chr13:8649019-8649519	epas1b	0.839718826101857	epas1b::Inter	2.14529	9.57356e-07	0.204096	MG	2.88953	0.000714166	0.136575	MG
chr14:1082092-1082592	si:ch1073-303k11.2	0.332343465502304	si:ch1073-303k11.2::Inter	1.59764	3.88649e-06	0.21686	MG	1.28139	4.13641e-05	0.196778	MG
chr14:1108300-1108800	si:ch1073-303k11.2	0.809320821820957	si:ch1073-303k11.2::Inter	2.26314	1.32109e-12	0.575433	MG	1.41437	1.79293e-05	0.290703	MG
chr14:1111025-1111525	si:ch1073-303k11.2	0.832745654070378	si:ch1073-303k11.2::TSS	1.35043	0.0846041	0.0591867	MG	1.31832	0.310992	0.0335302	MG
chr14:1273656-1274156	si:ch1073-303k11.2	0.448798627706294	si:ch1073-303k11.2::Inter	1.35532	9.10288e-05	0.280704	MG	3.80642	6.04382e-13	0.312844	MG
chr14:14806606-14807106	fhdc2	0.774404973075528	fhdc2::TSS	1.44427	0.0249115	0.0769411	MG	2.30883	0.00133443	0.141747	MG
chr14:14807738-14808238	fhdc2	0.856882518030274	fhdc2::TSS	3.29246	1.68463e-12	0.367234	MG	3.27689	1.75145e-06	0.155497	MG
chr14:20342375-20342875	aff2	0.841640620698081	aff2::TSS	1.39037	0.000114551	0.171791	MG	1.1374	0.000169989	0.178301	MG
chr14:20360788-20361288	aff2	0.69949012162216	aff2::Body	4.12798	0.00107856	0.084506	MG	2.96738	0.085081	0.0568427	MG
chr14:20365804-20366304	aff2	0.616890484678059	aff2::Body	3.13026	0.0182127	0.0637694	MG	4.45889	0.0391242	0.0422368	MG
chr14:20470059-20470559	aff2	0.719433564313912	aff2::Body	3.59541	6.5843e-06	0.139032	MG	5.61742	4.65454e-05	0.0967648	MG
chr14:20475844-20476344	aff2	0.649439889702963	aff2::Body	2.44189	0.000716347	0.111513	MG	4.20106	3.39882e-06	0.160554	MG
chr14:20482753-20483253	aff2	0.7134290932174	aff2::Body	2.26915	2.00121e-06	0.189846	MG	4.1262	6.39409e-08	0.198405	MG
chr14:20485498-20485998	aff2	0.601670872800967	aff2::Body	2.98372	0.00337418	0.0694167	MG	4.07887	4.89878e-06	0.117561	MG
chr14:20503902-20504402	aff2	0.757546827292389	aff2::Body	3.37129	5.65778e-09	0.291405	MG	4.55287	0.00723672	0.0452154	MG
chr14:24214697-24215197	stc2a	0.490662506942976	stc2a::TSS	1.35237	0.0541087	0.0927563	MG	1.34319	0.179621	0.0529376	MG
chr14:25156610-25157110	htr4	0.592084004863399	htr4::Body	1.86527	0.18422	0.0317858	MG	2.54651	0.318094	0.00974288	MG
chr14:25186214-25186714	htr4	0.70719691281442	htr4::Body	2.71646	0.00120858	0.165637	MG	2.54657	0.0190097	0.0602881	MG
chr14:25190209-25190709	htr4	0.547642910269426	htr4::Body	3.91569	0.024433	0.0467229	MG	3.82359	0.177299	0.0264758	MG
chr14:25308880-25309380	htr4	0.763091907661948	htr4::TSS	2.40982	0.0262286	0.136232	MG	3.25493	2.85173e-05	0.173347	MG
chr14:25332188-25332688	htr4	0.662469159035968	htr4::Inter	4.14461	0.1262	0.0459497	MG	2.14174	0.287592	0.0430988	MG
chr14:25366986-25367486	slc25a48	0.443452820626024	slc25a48::Inter	2.86005	0.0622338	0.067279	MG	2.70955	1.84072e-07	0.290398	MG
chr14:25382065-25382565	slc25a48	0.760047366980861	slc25a48::Inter	4.60419	0.000200275	0.143374	MG	3.64861	0.000211651	0.0940062	MG
chr14:25388645-25389145	slc25a48	0.687257467759418	slc25a48::Inter	2.40213	0.132044	0.0444738	MG	2.50024	0.0110584	0.108387	MG
chr14:25417650-25418150	htr4	0.664259810752802	htr4::Inter;slc25a48::Inter	2.49753	0.180027	0.0336399	MG	3.11487	0.0154267	0.0502351	MG
chr14:25417650-25418150	slc25a48	0.664259810752802	htr4::Inter;slc25a48::Inter	2.49753	0.180027	0.0336399	MG	3.11487	0.0154267	0.0502351	MG
chr14:25596536-25597036	slc25a48	0.621127165138207	slc25a48::TSS	2.97041	0.0628272	0.0564408	MG	3.09284	0.119035	0.0566979	MG
chr14:25597949-25598449	slc25a48	0.725016824550967	slc25a48::TSS	2.03325	0.0124006	0.041762	MG	2.35578	0.0268159	0.046876	MG
chr14:25598781-25599281	slc25a48	0.803843648053078	slc25a48::TSS	2.71052	0.0922447	0.0736448	MG	5.43144	0.000187718	0.0848178	MG
chr14:25617895-25618395	slc25a48	0.662028696521596	slc25a48::Inter	2.90412	0.00245367	0.109769	MG	3.02612	0.000113687	0.142143	MG
chr14:25955914-25956414	sparc	0.641705680141497	sparc::TSS	1.30014	0.124168	0.0787555	MG	1.98627	0.000502663	0.15761	MG
chr14:25956591-25957091	sparc	0.837496971909217	sparc::TSS	3.50653	0.00070439	0.0844674	MG	2.69204	0.0125846	0.0504002	MG
chr14:25981639-25982139	sparc	0.372565958293676	sparc::Inter	1.66818	0.171148	0.0327236	MG	1.53968	0.100545	0.0686824	MG
chr14:26566701-26567201	arap3	0.744932191698404	arap3::TSS	1.08987	0.244424	0.0356157	MG	1.05152	0.0703518	0.0552218	MG
chr14:26567217-26567717	arap3	0.762743393850135	arap3::Body	2.84304	0.00770699	0.0959467	MG	1.55348	0.150458	0.0371009	MG
chr14:26740929-26741429	arap3	0.79346589159292	arap3::Inter	0.978065	0.0201049	0.0355883	MG	1.92262	0.0860205	0.0456424	MG
chr14:28109603-28110103	mid2	0.574694648639033	mid2::Inter	1.16718	0.163242	0.0994464	MG	1.04257	0.177299	0.068822	MG
chr14:28177408-28177908	mid2	0.517763866810473	mid2::Inter	4.2034	1.31966e-06	0.187546	MG	3.05721	0.0260684	0.0625339	MG
chr14:28259011-28259511	mid2	0.561568200552889	mid2::Inter	1.5756	0.0155845	0.0811163	MG	2.7984	0.00828838	0.0728957	MG
chr14:31138009-31138509	gpc4	0.740597235633057	gpc4::Body	1.06841	0.186491	0.122406	MG	1.41464	0.000102169	0.229717	MG
chr14:31165018-31165518	gpc4	0.722006906603641	gpc4::Inter	3.80193	0.00131896	0.113416	MG	3.71225	4.66396e-14	0.408061	MG
chr14:31269059-31269559	gpc4	0.554211678575491	gpc4::Inter	2.73703	0.0037657	0.126355	MG	3.04228	0.00360718	0.104742	MG
chr14:3229483-3229983	pdgfrb	0.880849091181183	pdgfrb::TSS	3.96683	3.19076e-09	0.263667	MG	6.06937	4.46996e-10	0.256967	MG
chr14:3231177-3231677	pdgfrb	0.65286329724708	pdgfrb::Body	3.51255	0.00430011	0.0639428	MG	3.26859	0.0100218	0.0651105	MG
chr14:32639356-32639856	BX088596.1	0.619285010088179	BX088596.1::Inter	1.33706	0.00787439	0.172737	MG	1.61936	1.04771e-11	0.532127	MG
chr14:32653455-32653955	BX088596.1	0.348015271930298	BX088596.1::Inter	0.863891	0.0895267	0.0403656	MG	2.20935	0.242658	0.0619205	MG
chr14:32670184-32670684	BX088596.1	0.573294577825472	BX088596.1::Inter	1.58411	0.000474458	0.292988	MG	0.99329	1.80499e-06	0.427091	MG
chr14:3267400-3267900	pdgfrb	0.857841315129981	pdgfrb::Body	4.49695	2.24205e-05	0.140681	MG	4.55815	0.0260605	0.0453886	MG
chr14:3267904-3268404	pdgfrb	0.93510689129433	pdgfrb::TSS	5.08739	2.15929e-21	0.656768	MG	6.57407	8.37284e-08	0.189694	MG
chr14:32682146-32682646	BX088596.1	0.543181116285002	BX088596.1::Inter	2.73669	0.255624	0.0648788	MG	1.08273	0.316319	0.0384299	MG
chr14:32682991-32683491	BX088596.1	0.82549073789332	BX088596.1::Inter	1.86714	1.43909e-06	0.245208	MG	1.85464	4.04935e-06	0.257428	MG
chr14:32714762-32715262	BX088596.1	0.516512036068441	BX088596.1::Inter	1.12385	2.09607e-06	0.513366	MG	0.81735	0.000240287	0.461957	MG
chr14:32740368-32740868	BX088596.1	0.598914080564804	BX088596.1::Inter	3.17252	0.00210152	0.0755482	MG	1.48965	0.00011846	0.168482	MG
chr14:32754846-32755346	BX088596.1	0.84529534525597	BX088596.1::Inter	2.52617	9.77488e-09	0.217738	MG	2.06897	0.0410115	0.0981464	MG
chr14:32819954-32820454	BX088596.1	0.840336655947194	BX088596.1::Inter	3.35127	0.000961839	0.120784	MG	4.47655	0.0112447	0.0427819	MG
chr14:33065736-33066236	dlg3	0.537942981949584	dlg3::Inter;si:dkey-31j3.11::Inter	2.49416	8.82627e-09	0.34458	MG	4.91737	4.09601e-05	0.132361	MG
chr14:33065736-33066236	si:dkey-31j3.11	0.537942981949584	dlg3::Inter;si:dkey-31j3.11::Inter	2.49416	8.82627e-09	0.34458	MG	4.91737	4.09601e-05	0.132361	MG
chr14:33068845-33069345	dlg3	0.589091136773328	dlg3::Inter;si:dkey-31j3.11::Inter	2.74573	0.0908375	0.0590124	MG	2.41723	0.114611	0.0311819	MG
chr14:33068845-33069345	si:dkey-31j3.11	0.589091136773328	dlg3::Inter;si:dkey-31j3.11::Inter	2.74573	0.0908375	0.0590124	MG	2.41723	0.114611	0.0311819	MG
chr14:33107694-33108194	dlg3	0.495961173717002	dlg3::Body	3.2391	0.126353	0.0490367	MG	3.19172	0.318094	0.0163723	MG
chr14:33198469-33198969	si:dkey-31j3.11	0.613923316677555	si:dkey-31j3.11::Body	1.2189	0.0567315	0.0606967	MG	2.54048	0.027657	0.0626105	MG
chr14:33217152-33217652	si:dkey-31j3.11	0.70254756957689	si:dkey-31j3.11::TSS	1.37281	0.14188	0.0582348	MG	2.93757	0.0272045	0.0735824	MG
chr14:33217877-33218377	si:dkey-31j3.11	0.866503960763609	si:dkey-31j3.11::TSS	1.31194	0.000182482	0.142211	MG	1.68003	0.000149546	0.133082	MG
chr14:33218451-33218951	si:dkey-31j3.11	0.644776585846231	si:dkey-31j3.11::TSS	1.4152	0.005705	0.192963	MG	0.876817	0.0260605	0.134484	MG
chr14:33460312-33460812	atp1b4	0.917710424068953	atp1b4::Body	2.36981	1.03293e-06	0.200741	MG	1.93454	0.161848	0.0411547	MG
chr14:33461010-33461510	atp1b4	0.522315559154153	atp1b4::Body	0.739405	0.299474	0.0944877	MG	4.57026	1.80385e-06	0.162982	MG
chr14:33656420-33656920	atp1b4	0.40000448666651	atp1b4::Inter	1.56806	0.279546	0.0326104	MG	2.80239	0.286902	0.0248828	MG
chr14:4065457-4065957	enpp6	0.750261525187979	enpp6::Body	1.62757	0.0189826	0.0903883	MG	3.43069	0.00999873	0.0757825	MG
chr14:4073487-4073987	enpp6	0.789527743411346	enpp6::Body	5.1671	0.00307617	0.0702808	MG	4.38715	0.000672607	0.11626	MG
chr14:4076153-4076653	enpp6	0.85033604191384	enpp6::TSS	1.82411	0.00259468	0.0963838	MG	1.48231	0.190238	0.0345472	MG
chr14:4151078-4151578	dhrs13l1	0.830993797988403	dhrs13l1::TSS	3.32518	4.99391e-07	0.292718	MG	2.49646	0.00538466	0.135437	MG
chr14:4333289-4333789	dhrs13l1	0.588436525018214	dhrs13l1::Inter	2.67865	0.00163784	0.130641	MG	4.1909	0.0583433	0.0347356	MG
chr14:46596876-46597376	prom1a	0.548803591438477	prom1a::Body	3.4951	0.00154946	0.135296	MG	2.69753	0.000278037	0.0799159	MG
chr14:47847302-47847802	rapgef2	ND	rapgef2::TSS	1.23622	0.177374	0.0711347	MG	1.47481	0.0255659	0.12386	MG
chr14:47964576-47965076	rapgef2	0.34995344079414	rapgef2::Body	2.71679	3.89555e-06	0.204175	MG	3.17333	9.96478e-10	0.255471	MG
chr14:47974440-47974940	rapgef2	0.443188030711626	rapgef2::Body	3.56452	1.35944e-09	0.315233	MG	1.8187	0.00382444	0.131306	MG
chr14:48008695-48009195	rapgef2	0.462060406627239	rapgef2::Body	0.687853	0.0274592	0.0593815	MG	1.1432	0.0366252	0.157641	MG
chr14:48009236-48009736	rapgef2	0.768764275764316	rapgef2::Body	0.818042	0.186682	0.112402	MG	1.52141	4.15751e-05	0.258655	MG
chr14:48187479-48187979	rxfp1	0.598652655156162	rxfp1::TSS	3.95143	0.000278051	0.125917	MG	3.027	0.242658	0.0143886	MG
chr14:49604548-49605048	LO018188.1	0.933375659201019	LO018188.1::Body	2.37241	3.16596e-06	0.162952	MG	1.90006	0.080033	0.0751651	MG
chr14:49617961-49618461	LO018188.1	0.647070917645784	LO018188.1::Body	1.32701	0.0636434	0.0901407	MG	2.86822	0.0391242	0.0472715	MG
chr14:50902729-50903229	CU302253.1	0.929800785390691	CU302253.1::Inter	3.14002	8.06821e-16	0.535767	MG	3.47321	5.36296e-18	0.466435	MG
chr14:5409752-5410252	fgf24	0.486131187302796	fgf24::Inter	1.54526	0.167417	0.0575073	MG	1.9997	0.0586189	0.108441	MG
chr14:5411492-5411992	fgf24	0.892585118653395	fgf24::Inter	3.88505	5.15643e-14	0.476743	MG	2.73099	0.000110172	0.099705	MG
chr14:5413275-5413775	fgf24	0.696516747045718	fgf24::Inter	2.32075	0.0918692	0.0410118	MG	1.57199	0.228257	0.0645904	MG
chr14:5543084-5543584	fgf24	0.823390797933088	fgf24::Body	2.01229	0.00102513	0.100632	MG	3.64331	0.00130167	0.0754397	MG
chr14:5545240-5545740	fgf24	0.792356298660479	fgf24::TSS	2.11718	0.0263682	0.0639155	MG	2.93504	0.0175672	0.066953	MG
chr14:5546257-5546757	fgf24	0.921112281376852	fgf24::TSS	2.62278	4.66068e-07	0.184552	MG	3.22906	3.09865e-07	0.199059	MG
chr14:5571046-5571546	fgf24	0.790905361242802	fgf24::Inter	3.25996	0.0377546	0.0540586	MG	2.73026	0.22307	0.0473384	MG
chr15:10135195-10135695	tenm4	0.746730225676558	tenm4::Body	3.85181	1.34158e-07	0.175256	MG	2.56497	0.0261472	0.0691217	MG
chr15:10433210-10433710	tenm4	0.741694841261402	tenm4::Body	4.20067	6.75537e-11	0.398494	MG	3.04216	9.85159e-09	0.325705	MG
chr15:10442483-10442983	tenm4	0.422977943504018	tenm4::Body	1.62802	0.00746793	0.0885987	MG	3.87876	5.25818e-05	0.120257	MG
chr15:10455216-10455716	tenm4	0.881590134163435	tenm4::TSS	1.37707	0.000727401	0.179096	MG	0.93484	0.300069	0.0805482	MG
chr15:14887055-14887555	CR936977.2	0.94636262751281	CR936977.2::Body	2.98778	1.0081e-10	0.342735	MG	5.05661	7.83533e-18	0.514385	MG
chr15:18655018-18655518	cadm1b	0.944592010914657	cadm1b::Inter	3.39354	1.26181e-17	0.658597	MG	4.41531	1.93313e-14	0.389289	MG
chr15:18672600-18673100	cadm1b	0.748046428106714	cadm1b::Inter	2.64415	0.12573	0.115701	MG	2.31314	0.0589218	0.0435591	MG
chr15:18700087-18700587	cadm1b	0.866187616811553	cadm1b::Inter	2.89328	0.000735777	0.174747	MG	5.66809	1.01515e-12	0.303728	MG
chr15:18714435-18714935	cadm1b	0.793573275066184	cadm1b::Inter	3.09671	0.0417404	0.0431489	MG	2.56797	0.0788639	0.0413596	MG
chr15:18725442-18725942	cadm1b	0.79383507897576	cadm1b::Inter	3.58042	0.00548892	0.117336	MG	3.99832	3.06863e-06	0.150149	MG
chr15:18740533-18741033	cadm1b	0.483204313032881	cadm1b::Inter	1.42895	0.131393	0.0282551	MG	2.93791	0.318094	0.0134064	MG
chr15:18743860-18744360	cadm1b	0.891228286907609	cadm1b::Inter	3.44166	1.68478e-05	0.158081	MG	3.62326	0.000174627	0.0954475	MG
chr15:19249153-19249653	igsf9ba	0.566897310173788	igsf9ba::TSS	1.23701	0.208703	0.0469984	MG	0.758771	0.11122	0.037752	MG
chr15:20042646-20043146	plekhg2	0.484416392203396	plekhg2::Inter	1.89352	1.77727e-09	0.431891	MG	3.99873	6.55724e-10	0.308209	MG
chr15:20282081-20282581	plekhg2	0.661894309431487	plekhg2::TSS	4.63723	3.02058e-05	0.110689	MG	2.18343	1.553e-06	0.132137	MG
chr15:20303778-20304278	plekhg2	0.774798416881383	plekhg2::Body	1.21697	0.0181746	0.103833	MG	4.07425	9.75473e-09	0.189597	MG
chr15:20331741-20332241	plekhg2	0.716292811261455	plekhg2::Body	2.63814	4.3417e-05	0.176094	MG	1.71114	0.22599	0.0268726	MG
chr15:21786373-21786873	sik2b	0.82228109135629	sik2b::Body	3.58032	2.88826e-11	0.241562	MG	2.82757	5.56147e-07	0.171989	MG
chr15:21786887-21787387	sik2b	0.868636411165782	sik2b::Body	4.25606	1.7263e-17	0.412331	MG	3.13515	6.16839e-11	0.226201	MG
chr15:21793503-21794003	sik2b	0.851667256073021	sik2b::Body	3.66944	2.72404e-06	0.225383	MG	2.3105	0.0191259	0.0723516	MG
chr15:22311451-22311951	hepacama	0.865297161623074	hepacama::TSS	2.80861	0.000174638	0.163761	MG	3.62163	0.000276252	0.142057	MG
chr15:22313967-22314467	hepacama	0.897114876964981	hepacama::Body	3.11883	2.48419e-10	0.364461	MG	4.78121	8.7405e-13	0.314056	MG
chr15:22326251-22326751	hepacama	0.745432106296107	hepacama::Inter	2.63899	0.0283125	0.0584913	MG	2.76735	0.120394	0.0368117	MG
chr15:24463261-24463761	smtnl	0.470147097143628	smtnl::Inter	2.57133	0.0288857	0.0679528	MG	2.44818	0.22082	0.0376123	MG
chr15:24633058-24633558	smtnl	0.81092485631811	smtnl::Inter	2.3054	0.00022451	0.247364	MG	3.56499	0.00145506	0.113316	MG
chr15:24641596-24642096	smtnl	0.877376834458413	smtnl::TSS	3.8167	7.03795e-07	0.28368	MG	5.38642	6.75715e-15	0.394134	MG
chr15:24643694-24644194	smtnl	0.850238352773636	smtnl::TSS	2.40781	1.18255e-07	0.286106	MG	3.89366	5.45939e-07	0.180901	MG
chr15:24647165-24647665	smtnl	0.785162444034738	smtnl::Body	2.67963	0.00881676	0.106368	MG	3.90755	0.0583433	0.0281828	MG
chr15:24654486-24654986	smtnl	0.607662706831516	smtnl::Body	2.50737	0.0082001	0.0487647	MG	1.34116	0.0606488	0.0340567	MG
chr15:24656748-24657248	smtnl	0.715244845325505	smtnl::Body	2.61507	0.214098	0.0448068	MG	1.70182	0.286902	0.019498	MG
chr15:24657373-24657873	smtnl	0.625684456067457	smtnl::Body	1.91895	0.0996845	0.077725	MG	1.85166	0.147091	0.0423808	MG
chr15:24659324-24659824	smtnl	0.519291442248921	smtnl::Body	1.15971	0.00971767	0.129191	MG	2.16041	0.0283449	0.0786035	MG
chr15:31093444-31093944	ksr1b	0.711606123741136	ksr1b::Body	2.30337	0.00142457	0.168267	MG	4.45299	0.125737	0.0420563	MG
chr15:31109272-31109772	ksr1b	0.709665148806884	ksr1b::TSS	1.64281	0.00291496	0.13336	MG	1.07637	0.273393	0.0266538	MG
chr15:31147010-31147510	ksr1b	0.838151442579333	ksr1b::TSS	1.82849	0.000497341	0.105454	MG	2.86221	0.00162323	0.102552	MG
chr15:3284144-3284644	foxo1a	0.740854908761293	foxo1a::TSS	1.84445	0.000821013	0.389449	MG	1.78408	0.0957876	0.13722	MG
chr15:3438449-3438949	foxo1a	0.561820078408111	foxo1a::Inter	3.09533	2.52272e-06	0.298082	MG	2.77492	0.161848	0.0318567	MG
chr15:34418278-34418778	agmo	0.760227243339003	agmo::TSS	2.2583	0.0103452	0.131032	MG	2.70252	0.223723	0.0391013	MG
chr15:3443163-3443663	foxo1a	0.698947678251636	foxo1a::Inter	1.84775	0.174835	0.101073	MG	3.25751	0.0231961	0.0523736	MG
chr15:3459515-3460015	foxo1a	0.603643096021359	foxo1a::Inter	1.30914	0.151069	0.139822	MG	1.34346	0.0187508	0.0663472	MG
chr15:3712443-3712943	CABZ01061591.1	0.671909705500298	CABZ01061591.1::Inter	4.12857	0.0247177	0.087538	MG	2.53937	0.164161	0.0436076	MG
chr15:3825106-3825606	CABZ01061591.1	0.751850927528426	CABZ01061591.1::TSS	1.41582	0.00189431	0.171917	MG	1.73509	6.46996e-05	0.208464	MG
chr15:39852543-39853043	ngef	0.563291799567745	ngef::Inter	3.50636	0.0568227	0.0515773	MG	2.79326	0.0583433	0.0473345	MG
chr15:3995519-3996019	CABZ01061591.1	0.820184571704509	CABZ01061591.1::Inter	2.75906	0.0130103	0.0765921	MG	3.7422	0.114306	0.037516	MG
chr15:40069892-40070392	efhd1	0.728469365314308	efhd1::Inter	4.67119	0.0041965	0.0933134	MG	3.7557	0.177299	0.0251661	MG
chr15:40072661-40073161	ngef	0.896726835056491	ngef::TSS	3.17461	1.18251e-05	0.16955	MG	3.32707	0.000270481	0.132226	MG
chr15:40074858-40075358	ngef	0.790401463224791	ngef::TSS	1.23315	0.0738818	0.044595	MG	1.91473	0.242658	0.0409343	MG
chr15:40075744-40076244	ngef	ND	ngef::TSS	3.43128	0.0373951	0.0388348	MG	4.32917	0.0391242	0.0384318	MG
chr15:40090780-40091280	ngef	0.877022095164138	ngef::Body	1.9031	1.03396e-06	0.220908	MG	2.97322	0.000275033	0.121075	MG
chr15:40187818-40188318	efhd1	0.659637026631245	efhd1::TSS	1.37194	8.29102e-08	0.362781	MG	2.19199	1.24557e-10	0.423075	MG
chr15:40189625-40190125	efhd1	0.90733437136543	efhd1::Body	4.07301	3.63689e-08	0.261841	MG	3.78205	1.90478e-08	0.19908	MG
chr15:40190215-40190715	efhd1	0.764238276066165	efhd1::Body	4.73327	0.000766872	0.0515058	MG	3.88411	0.00735586	0.0793609	MG
chr15:40208647-40209147	efhd1	0.541688720935129	efhd1::Body	1.49984	0.116495	0.088661	MG	1.6295	0.229089	0.051675	MG
chr15:42396926-42397426	tiam1b	0.739275824920304	tiam1b::TSS	1.47063	0.0103701	0.208273	MG	2.34532	0.0115331	0.114111	MG
chr15:42409445-42409945	tiam1b	0.901468748891037	tiam1b::Body	3.05535	1.56314e-10	0.381436	MG	2.61547	5.64982e-08	0.311868	MG
chr15:42452536-42453036	tiam1b	0.902116249607517	tiam1b::Body	2.80341	6.0045e-12	0.556841	MG	3.9646	0.00260056	0.0749779	MG
chr15:4283594-4284094	ece2b	0.675557636729986	ece2b::Body	2.52119	3.3267e-06	0.24578	MG	3.60944	4.94736e-16	0.453145	MG
chr15:4337299-4337799	ece2b	0.359324092009988	ece2b::Inter	2.32582	0.126402	0.116907	MG	1.3466	0.306512	0.0572912	MG
chr15:4405145-4405645	atp1b3b	0.598559552961476	atp1b3b::Body	2.04626	0.0467698	0.0809806	MG	3.08284	0.000429581	0.0949026	MG
chr15:4451015-4451515	ece2b	0.347523358742968	ece2b::Inter	2.50196	0.000745879	0.212781	MG	1.09587	0.0343871	0.171055	MG
chr15:7064592-7065092	pik3cb	0.831142686132901	pik3cb::TSS	2.12676	0.00327887	0.128713	MG	3.3449	4.6851e-07	0.192293	MG
chr15:7087071-7087571	pik3cb	0.759711157474057	pik3cb::TSS	3.66128	0.00324934	0.0846318	MG	2.80899	0.0190387	0.106922	MG
chr16:12476577-12477077	mfap5	0.401977865414783	mfap5::Inter	3.93866	1.67476e-11	0.3488	MG	2.90211	3.4326e-05	0.164189	MG
chr16:12501829-12502329	mfap5	0.850791974569353	mfap5::Inter	1.64341	0.00061709	0.130935	MG	3.032	0.00826591	0.0944985	MG
chr16:13717024-13717524	ttyh1	0.602930892441624	ttyh1::Body	2.17341	0.0194641	0.0702561	MG	2.02158	0.0239327	0.132774	MG
chr16:13854804-13855304	zgc:174888	0.721184679882618	zgc:174888::TSS	2.37872	4.93834e-06	0.278945	MG	2.07824	0.0231424	0.0755106	MG
chr16:15107945-15108445	sntb1	0.500516510075453	sntb1::Inter	2.4303	0.123858	0.0759874	MG	4.35428	0.00166482	0.0974808	MG
chr16:15147405-15147905	sntb1	0.896480148610727	sntb1::Inter	2.65891	2.17941e-10	0.313352	MG	3.79792	1.74305e-19	0.456516	MG
chr16:15153568-15154068	sntb1	0.737291111459505	sntb1::Inter	3.16011	0.000881323	0.128054	MG	2.33178	0.00231932	0.126329	MG
chr16:15158545-15159045	sntb1	0.88190046631018	sntb1::Inter	3.22969	1.27357e-06	0.231752	MG	3.30095	5.63806e-25	0.731246	MG
chr16:15261041-15261541	sntb1	ND	sntb1::TSS	2.83905	0.202618	0.0123853	MG	3.88925	0.0860205	0.0278022	MG
chr16:15262644-15263144	sntb1	0.748329370467477	sntb1::TSS	0.856635	0.0352452	0.0877953	MG	1.66451	0.00148789	0.150219	MG
chr16:15263617-15264117	sntb1	0.632962921424777	sntb1::TSS	2.69322	0.0362176	0.105678	MG	2.2539	0.0974254	0.0780119	MG
chr16:22556333-22556833	cgna	0.574793868342321	cgna::Body	2.36501	0.0131721	0.0647121	MG	3.87979	5.34318e-07	0.184333	MG
chr16:22558759-22559259	cgna	0.416807409555985	cgna::Body	2.92486	0.130743	0.0433793	MG	3.11342	0.0076055	0.0562626	MG
chr16:22571045-22571545	cgna	0.639333374753203	cgna::Body	2.23047	6.81085e-07	0.348469	MG	2.26163	1.12975e-11	0.431365	MG
chr16:22571673-22572173	cgna	0.575493880831999	cgna::Body	1.63402	0.0440781	0.0290873	MG	1.91295	0.00356019	0.0798023	MG
chr16:23960601-23961101	apoeb	0.733768445099644	apoeb::TSS	1.77571	3.63102e-07	0.30026	MG	2.20334	0.000655713	0.15741	MG
chr16:23987173-23987673	apoeb	0.386810324014664	apoeb::Inter	1.19544	0.18146	0.023393	MG	1.48321	0.286902	0.0309948	MG
chr16:24501189-24501689	fxyd6l	0.663317311983878	fxyd6l::Inter	1.4734	0.0611905	0.050569	MG	4.409	0.00262222	0.110348	MG
chr16:24609752-24610252	fxyd6l	0.873215720017346	fxyd6l::Body	3.7486	1.32885e-08	0.199302	MG	3.85418	1.45011e-06	0.169679	MG
chr16:24610324-24610824	fxyd6l	0.779732623919837	fxyd6l::Body	1.2969	0.00341525	0.0696714	MG	2.08932	0.210559	0.0423728	MG
chr16:2791226-2791726	tgfb2	0.620300154462297	tgfb2::Body	2.11192	0.00144363	0.135869	MG	3.45807	0.242658	0.0200998	MG
chr16:2807026-2807526	tgfb2	0.660989742794758	tgfb2::TSS	2.03487	0.00876623	0.0803541	MG	1.88709	0.22082	0.0179023	MG
chr16:2807897-2808397	tgfb2	0.746240869308823	tgfb2::TSS	2.53784	5.33215e-07	0.341623	MG	4.29805	8.00116e-06	0.154866	MG
chr16:28596302-28596802	acbd7	ND	acbd7::TSS	1.01756	0.0276938	0.160094	MG	0.827913	0.165314	0.143952	MG
chr16:28596824-28597324	acbd7	0.369759519755404	acbd7::Body	0.885499	0.126196	0.0692999	MG	1.42428	0.0162983	0.141394	MG
chr16:28599208-28599708	acbd7	0.382561785370467	acbd7::Body	2.7304	1.26114e-09	0.382738	MG	2.19673	5.92894e-09	0.358805	MG
chr16:28804383-28804883	acbd7	0.352018020569154	acbd7::Inter	3.63102	3.09126e-18	0.687289	MG	2.0904	0.167135	0.0358989	MG
chr16:29203649-29204149	CR848047.1	0.55026059313402	CR848047.1::Inter	0.641978	0.0891513	0.0475616	MG	2.4719	3.44372e-05	0.186886	MG
chr16:29204279-29204779	CR848047.1	0.867751707661281	CR848047.1::Inter	0.936075	0.0850825	0.151638	MG	1.61098	2.57586e-08	0.3971	MG
chr16:29211170-29211670	CR848047.1	0.61019610658533	CR848047.1::Inter	1.98858	0.180027	0.0731522	MG	1.36328	0.115065	0.078688	MG
chr16:29215311-29215811	CR848047.1	0.797634091019277	CR848047.1::Inter	2.55245	9.00046e-12	0.458781	MG	2.07603	1.80184e-07	0.173267	MG
chr16:29215982-29216482	CR848047.1	0.520718696863618	CR848047.1::Inter	2.82681	0.00342676	0.0893983	MG	2.38668	0.000138118	0.120448	MG
chr16:29218498-29218998	CR848047.1	0.807498146227227	CR848047.1::Inter	2.05829	4.05059e-07	0.335777	MG	4.05457	1.87311e-11	0.249397	MG
chr16:29225735-29226235	CR848047.1	0.692146934321953	CR848047.1::Inter	1.13913	0.266509	0.0789281	MG	2.32034	0.000460893	0.0997604	MG
chr16:29229299-29229799	CR848047.1	0.505559744725131	CR848047.1::Inter	3.1674	0.126304	0.0398392	MG	3.147	0.0115729	0.0630764	MG
chr16:29230159-29230659	CR848047.1	0.74490129764479	CR848047.1::Inter	2.20412	0.279546	0.0384445	MG	2.32392	0.158164	0.0373714	MG
chr16:29230672-29231172	CR848047.1	0.869894280232484	CR848047.1::Inter	1.15736	0.159798	0.149601	MG	3.3403	2.95167e-13	0.415189	MG
chr16:29233182-29233682	CR848047.1	0.785092390381865	CR848047.1::Inter	0.660668	0.278901	0.140207	MG	2.02394	6.93061e-07	0.31679	MG
chr16:29244402-29244902	CR848047.1	0.681764873010375	CR848047.1::Inter	1.64927	0.243713	0.0222091	MG	2.21233	0.0622168	0.0604505	MG
chr16:29245036-29245536	CR848047.1	0.860472071795981	CR848047.1::Inter	2.42651	1.86765e-08	0.414723	MG	1.90458	1.64483e-17	0.751971	MG
chr16:29253003-29253503	CR848047.1	0.771714209973768	CR848047.1::Inter;rhbg::Inter	1.19572	0.0422427	0.0270335	MG	1.26027	0.22599	0.0137073	MG
chr16:29253003-29253503	rhbg	0.771714209973768	CR848047.1::Inter;rhbg::Inter	1.19572	0.0422427	0.0270335	MG	1.26027	0.22599	0.0137073	MG
chr16:29253520-29254020	CR848047.1	0.926866422930651	CR848047.1::Inter;rhbg::Inter	2.49405	1.1721e-17	0.821327	MG	3.67292	2.01967e-25	0.668377	MG
chr16:29253520-29254020	rhbg	0.926866422930651	CR848047.1::Inter;rhbg::Inter	2.49405	1.1721e-17	0.821327	MG	3.67292	2.01967e-25	0.668377	MG
chr16:29257089-29257589	CR848047.1	0.83810507074772	CR848047.1::Inter;rhbg::Inter	1.3096	0.00419304	0.268504	MG	2.024	1.56855e-07	0.318452	MG
chr16:29257089-29257589	rhbg	0.83810507074772	CR848047.1::Inter;rhbg::Inter	1.3096	0.00419304	0.268504	MG	2.024	1.56855e-07	0.318452	MG
chr16:29257694-29258194	CR848047.1	0.860149942117538	CR848047.1::Inter;rhbg::Inter	2.28945	0.00111161	0.176237	MG	1.0412	0.011899	0.0802807	MG
chr16:29257694-29258194	rhbg	0.860149942117538	CR848047.1::Inter;rhbg::Inter	2.28945	0.00111161	0.176237	MG	1.0412	0.011899	0.0802807	MG
chr16:29263733-29264233	CR848047.1	0.824839754508213	CR848047.1::Inter;rhbg::Inter	2.54805	0.0164357	0.167632	MG	1.8034	0.0121411	0.154453	MG
chr16:29263733-29264233	rhbg	0.824839754508213	CR848047.1::Inter;rhbg::Inter	2.54805	0.0164357	0.167632	MG	1.8034	0.0121411	0.154453	MG
chr16:29265215-29265715	CR848047.1	0.53691340238698	CR848047.1::Inter	1.13018	0.279546	0.0638727	MG	1.03249	0.0796071	0.115576	MG
chr16:29272449-29272949	CR848047.1	0.595452183399411	CR848047.1::Inter	1.91896	0.0284354	0.118908	MG	1.03673	0.143947	0.0857077	MG
chr16:29275264-29275764	rhbg	0.767360137793092	rhbg::Body	2.35669	0.120639	0.0386813	MG	2.98108	0.00505582	0.0528591	MG
chr16:29275885-29276385	rhbg	0.907284834086484	rhbg::TSS	1.99296	5.12166e-06	0.275766	MG	5.15791	8.0646e-22	0.455448	MG
chr16:29276940-29277440	rhbg	0.910097000684602	rhbg::TSS	3.63118	1.72948e-06	0.25721	MG	4.78917	0.00257183	0.0795921	MG
chr16:29471227-29471727	mcl1b	0.689519271503316	mcl1b::Inter;rhbg::Inter	2.1613	0.0107949	0.11984	MG	2.02619	0.116989	0.0590768	MG
chr16:29471227-29471727	rhbg	0.689519271503316	mcl1b::Inter;rhbg::Inter	2.1613	0.0107949	0.11984	MG	2.02619	0.116989	0.0590768	MG
chr16:29612248-29612748	mcl1b	0.668945892565254	mcl1b::Inter	2.24197	0.133124	0.0361302	MG	3.15913	0.0349716	0.0423399	MG
chr16:3009190-3009690	tgfb2	0.368981412272332	tgfb2::Inter	3.61898	0.0373951	0.0461242	MG	4.14572	0.0583433	0.0336027	MG
chr16:35661501-35662001	map7d1a	0.768244202784795	map7d1a::TSS	0.83814	0.0294009	0.0862341	MG	0.39484	0.242658	0.0473657	MG
chr16:40711789-40712289	si:dkey-22o22.2	0.673563753011228	si:dkey-22o22.2::Body	1.09024	0.112206	0.143418	MG	1.81259	0.00201578	0.162323	MG
chr16:40739363-40739863	si:dkey-22o22.2	0.624429455648748	si:dkey-22o22.2::Body	2.19412	6.95901e-06	0.25878	MG	3.48719	1.11183e-10	0.304775	MG
chr16:40745607-40746107	si:dkey-22o22.2	0.468441164033143	si:dkey-22o22.2::Body	2.57132	0.131393	0.0369849	MG	3.62351	0.161848	0.0460439	MG
chr16:40755594-40756094	si:dkey-22o22.2	0.442301695668595	si:dkey-22o22.2::Body	3.44522	6.75204e-07	0.311504	MG	3.69722	6.30215e-11	0.318352	MG
chr16:40756229-40756729	si:dkey-22o22.2	0.616736971051171	si:dkey-22o22.2::Body	2.5894	6.21939e-07	0.335292	MG	2.59872	0.0181329	0.0871758	MG
chr16:40841139-40841639	si:dkey-22o22.2	0.764325086857543	si:dkey-22o22.2::TSS	2.35656	0.0277493	0.179136	MG	1.38689	0.126693	0.0969958	MG
chr16:40854411-40854911	si:dkey-22o22.2	0.643046308769781	si:dkey-22o22.2::Inter	1.39958	0.290761	0.0557444	MG	2.21778	0.0274629	0.0691549	MG
chr16:40857195-40857695	si:dkey-22o22.2	0.650834102114205	si:dkey-22o22.2::Inter	1.65709	5.24625e-08	0.44172	MG	1.84391	1.24273e-10	0.324388	MG
chr16:40862016-40862516	si:dkey-22o22.2	0.488275252821487	si:dkey-22o22.2::Inter	2.50987	0.180027	0.0214421	MG	0.8803	0.169705	0.0172312	MG
chr16:42839816-42840316	si:dkey-7j14.6	0.524509862944954	si:dkey-7j14.6::Inter	4.39981	0.00656948	0.0671363	MG	3.70411	0.00411083	0.0517669	MG
chr16:42855975-42856475	si:dkey-7j14.6	0.477587795086613	si:dkey-7j14.6::Inter	5.41281	0.00193384	0.083704	MG	4.65697	1.68686e-12	0.338254	MG
chr16:42897280-42897780	si:dkey-7j14.6	0.78511278900715	si:dkey-7j14.6::Inter	1.3216	3.41815e-06	0.367848	MG	1.16902	0.000691829	0.241409	MG
chr16:42904430-42904930	si:dkey-7j14.6	0.547446459233196	si:dkey-7j14.6::Inter	0.621544	0.141938	0.0743013	MG	0.441497	0.242658	0.0243197	MG
chr16:43040566-43041066	si:dkey-7j14.6	0.697710336778155	si:dkey-7j14.6::Body	1.63667	0.0621377	0.0660426	MG	2.51695	0.0187508	0.0401661	MG
chr16:43041135-43041635	si:dkey-7j14.6	0.74048497655033	si:dkey-7j14.6::TSS	0.852507	0.223583	0.115511	MG	2.03861	0.000225364	0.140714	MG
chr16:45737042-45737542	paqr6	0.872350456124965	paqr6::TSS	4.2522	1.40496e-13	0.405943	MG	6.12628	4.26725e-06	0.138541	MG
chr16:45739104-45739604	paqr6	0.850332670195746	paqr6::TSS	2.88324	0.000115713	0.144331	MG	2.95345	0.00356955	0.0925322	MG
chr16:45739815-45740315	paqr6	0.5566183138325	paqr6::TSS	2.0846	0.304485	0.0323074	MG	2.16647	0.286902	0.0275837	MG
chr16:45936321-45936821	paqr6	0.668355921901921	paqr6::Inter	2.12632	0.25937	0.059403	MG	3.28786	0.0260605	0.0644532	MG
chr16:45981962-45982462	paqr6	0.463933831116362	paqr6::Inter	2.30063	0.227506	0.0887237	MG	1.68385	0.318094	0.038411	MG
chr16:46000695-46001195	mtmr11	0.628607186801471	mtmr11::TSS	1.27869	0.246723	0.0571237	MG	1.43189	0.0819667	0.106075	MG
chr16:46011154-46011654	mtmr11	0.905807089454919	mtmr11::Body	1.48616	0.000278412	0.209124	MG	3.21156	1.97234e-12	0.440348	MG
chr16:46023770-46024270	mtmr11	0.548482015527943	mtmr11::Body	0.581912	0.247469	0.0477964	MG	4.03069	2.40989e-05	0.168817	MG
chr16:48512618-48513118	si:ch73-31d8.2	0.865159992364745	si:ch73-31d8.2::Inter	3.93163	2.59303e-11	0.300573	MG	2.58924	0.0399981	0.0510852	MG
chr16:48521468-48521968	si:ch73-31d8.2	0.798566913020713	si:ch73-31d8.2::Inter	2.74856	0.00155688	0.112758	MG	4.17202	0.00976832	0.0868535	MG
chr16:48753258-48753758	si:ch73-31d8.2	0.867028696678866	si:ch73-31d8.2::TSS	3.9023	7.65753e-12	0.39099	MG	4.43628	2.2751e-08	0.214888	MG
chr16:48753920-48754420	si:ch73-31d8.2	ND	si:ch73-31d8.2::TSS	3.43228	0.202618	0.0197081	MG	2.83952	0.318094	0.01239	MG
chr16:48987948-48988448	si:ch73-31d8.2	0.332005241973151	si:ch73-31d8.2::Inter	2.01069	0.00282892	0.135325	MG	5.02274	0.00296971	0.0633972	MG
chr16:5511082-5511582	zgc:158689	0.759931785124033	zgc:158689::Inter	1.41218	0.0544169	0.179468	MG	1.87335	0.210559	0.0348788	MG
chr16:5677955-5678455	zgc:158689	0.881066882226701	zgc:158689::TSS	0.806164	0.0100882	0.160823	MG	1.43943	3.11643e-06	0.299498	MG
chr16:5681069-5681569	zgc:158689	0.546656244818469	zgc:158689::Body	2.17994	0.138341	0.0695501	MG	2.58006	0.0830488	0.0501931	MG
chr16:5689456-5689956	zgc:158689	0.854179956387252	zgc:158689::Body	1.38224	0.00322984	0.124453	MG	2.549	0.000282898	0.120804	MG
chr16:5875817-5876317	trak1a	0.729547741962541	trak1a::TSS	1.91838	0.0580742	0.0832996	MG	1.97571	0.287169	0.0263597	MG
chr16:5880758-5881258	zgc:158689	0.844372290685071	zgc:158689::Inter	2.99329	1.22425e-06	0.198467	MG	2.97475	0.118526	0.0613958	MG
chr16:5887061-5887561	trak1a	0.686474050445627	trak1a::Inter;zgc:158689::Inter	5.55639	0.00122114	0.0926733	MG	3.29451	0.22082	0.0330447	MG
chr16:5887061-5887561	zgc:158689	0.686474050445627	trak1a::Inter;zgc:158689::Inter	5.55639	0.00122114	0.0926733	MG	3.29451	0.22082	0.0330447	MG
chr16:6010855-6011355	trak1a	0.314598615622597	trak1a::Inter	3.20277	7.28473e-05	0.166012	MG	2.77407	7.16198e-07	0.244374	MG
chr16:8411313-8411813	grb10b	0.827425992228233	grb10b::Body	1.83847	0.000409364	0.247674	MG	1.27847	0.228168	0.0515274	MG
chr16:8508037-8508537	grb10b	0.698928904697548	grb10b::Body	1.897	0.000113171	0.168198	MG	4.99596	0.0011973	0.0621943	MG
chr16:8637776-8638276	grb10b	0.516902541040088	grb10b::Inter	2.39227	0.124938	0.084417	MG	2.06052	0.287169	0.031789	MG
chr16:9525848-9526348	ca14	0.73587307408503	ca14::Inter	1.597	0.00367343	0.205618	MG	1.80611	3.72516e-05	0.208038	MG
chr16:9540785-9541285	ca14	0.887270103023504	ca14::TSS	2.7372	2.88758e-05	0.230067	MG	3.00244	4.38055e-05	0.102151	MG
chr16:9541395-9541895	ca14	0.80575142966424	ca14::Body	3.23867	0.000175516	0.10468	MG	4.27561	0.00296971	0.0369579	MG
chr17:10144950-10145450	mipol1	0.606258002714302	mipol1::Inter	3.62294	0.00324057	0.0949059	MG	3.01705	0.242658	0.0142759	MG
chr17:10530747-10531247	tyro3	0.911307076313613	tyro3::Body	2.33601	2.53946e-15	0.568589	MG	2.99172	2.75044e-25	0.657957	MG
chr17:10678188-10678688	tyro3	0.451464297304315	tyro3::Inter	1.67269	0.129769	0.0837703	MG	1.12571	0.125737	0.0434748	MG
chr17:10678764-10679264	tyro3	0.526434919714767	tyro3::Inter	1.88804	0.000958391	0.30549	MG	1.55954	0.00971706	0.11038	MG
chr17:1381169-1381669	cep170b	0.310282876727603	cep170b::Inter	1.93111	0.132044	0.0409746	MG	1.54885	0.282031	0.064921	MG
chr17:1417021-1417521	cep170b	0.632420510625636	cep170b::Inter	2.43761	0.00806851	0.0874653	MG	2.07678	0.0162661	0.0924843	MG
chr17:1422907-1423407	cep170b	0.623876450171945	cep170b::Inter	3.72257	0.00662103	0.0634409	MG	3.63146	0.0347625	0.05461	MG
chr17:1432878-1433378	cep170b	0.820166860393071	cep170b::Inter	3.49382	1.39201e-13	0.513146	MG	6.44799	2.16466e-30	0.708791	MG
chr17:1437127-1437627	cep170b	0.60422664251085	cep170b::Inter	1.04838	0.265929	0.117811	MG	1.75225	0.00075411	0.184858	MG
chr17:14891920-14892420	samd4a	0.484275955828125	samd4a::Inter	2.93365	0.130743	0.0428475	MG	1.36976	0.169685	0.0806837	MG
chr17:15034111-15034611	samd4a	0.674173532194128	samd4a::Body	0.538292	0.233433	0.0502456	MG	1.86448	0.000309876	0.116131	MG
chr17:15431272-15431772	fabp7a	ND	fabp7a::TSS	1.3466	0.0959414	0.118737	MG	1.52915	0.00191469	0.159287	MG
chr17:15444180-15444680	fabp7a	0.373822672100649	fabp7a::Inter	1.33657	0.276182	0.04929	MG	3.12514	0.000221387	0.0639971	MG
chr17:1544761-1545261	cep170b	0.670675251531617	cep170b::TSS	1.56736	0.000267737	0.22546	MG	1.49822	0.000892165	0.143463	MG
chr17:1555836-1556336	cep170b	0.859739268368696	cep170b::Body	4.47847	2.48654e-12	0.359796	MG	7.18166	1.92333e-12	0.290093	MG
chr17:1558545-1559045	cep170b	0.658891141330054	cep170b::Body	4.28592	0.0636434	0.0372375	MG	4.02305	0.161848	0.0591742	MG
chr17:15985705-15986205	clmn	0.87767765173023	clmn::Body	2.65002	0.0127735	0.0765914	MG	2.27228	0.286902	0.0338614	MG
chr17:15995922-15996422	clmn	0.913804855775242	clmn::Body	6.08754	9.55915e-12	0.276924	MG	3.11493	0.000220025	0.0915464	MG
chr17:16001310-16001810	clmn	0.907318319889972	clmn::Body	4.43853	1.95282e-07	0.2265	MG	2.69096	0.00378926	0.0988618	MG
chr17:16789550-16790050	ston2	0.763366030759692	ston2::Body	3.27212	4.10013e-06	0.140826	MG	3.19313	0.000620926	0.108072	MG
chr17:16847118-16847618	dio2	0.776621147306327	dio2::Inter	2.68579	0.0131063	0.100099	MG	3.79706	8.5408e-05	0.112904	MG
chr17:16870494-16870994	dio2	0.662889872872718	dio2::Inter;ston2::Inter	2.67491	0.179729	0.0377966	MG	3.1531	2.12072e-08	0.211973	MG
chr17:16870494-16870994	ston2	0.662889872872718	dio2::Inter;ston2::Inter	2.67491	0.179729	0.0377966	MG	3.1531	2.12072e-08	0.211973	MG
chr17:16873195-16873695	dio2	0.895288799116375	dio2::TSS	1.73449	7.00063e-05	0.243098	MG	2.43408	9.3517e-08	0.217062	MG
chr17:16875048-16875548	dio2	0.639406608353802	dio2::Body	1.6972	0.181771	0.0248044	MG	2.24017	0.121053	0.0371181	MG
chr17:16876847-16877347	ston2	0.551554612087037	ston2::Inter	1.33262	0.0902087	0.0317976	MG	4.20825	0.0860205	0.0351802	MG
chr17:16895959-16896459	dio2	0.784933881657029	dio2::Inter;ston2::Inter	2.08046	2.50557e-10	0.476338	MG	3.30157	4.30487e-14	0.461123	MG
chr17:16895959-16896459	ston2	0.784933881657029	dio2::Inter;ston2::Inter	2.08046	2.50557e-10	0.476338	MG	3.30157	4.30487e-14	0.461123	MG
chr17:16918890-16919390	ston2	0.643317052265559	ston2::Inter	2.14242	2.34986e-05	0.171716	MG	3.5791	0.000858997	0.117983	MG
chr17:17718451-17718951	ccdc85ca	0.536859979457681	ccdc85ca::Inter	1.34463	0.0901729	0.0908577	MG	2.2455	1.89461e-05	0.199192	MG
chr17:17753469-17753969	ccdc85ca	0.41537107865458	ccdc85ca::Inter	3.00561	0.0854904	0.0916644	MG	2.0159	0.312604	0.0873312	MG
chr17:1783534-1784034	cep170b	0.696730348281941	cep170b::Inter	2.46726	0.0285075	0.0828329	MG	2.61745	0.286902	0.0356355	MG
chr17:21277081-21277581	hspa12a	0.828184789321757	hspa12a::Body	3.84874	4.37969e-13	0.367571	MG	3.98836	5.02771e-18	0.34779	MG
chr17:21277742-21278242	hspa12a	0.722429753545051	hspa12a::TSS	1.36014	0.131266	0.0429294	MG	2.47041	9.1595e-06	0.115103	MG
chr17:21514592-21515092	chst15	0.777788656451967	chst15::TSS	2.27794	0.000260593	0.145265	MG	1.64173	0.0313766	0.0608408	MG
chr17:21527220-21527720	chst15	0.948119818749205	chst15::Body	4.03439	6.28337e-15	0.441985	MG	6.93155	9.18584e-10	0.243599	MG
chr17:21529860-21530360	chst15	0.865023245322781	chst15::Body	2.48956	0.0421261	0.0535044	MG	1.24961	0.27014	0.0401219	MG
chr17:21651295-21651795	chst15	0.59100460289156	chst15::Inter	1.95105	0.279546	0.0824978	MG	4.14814	0.00974269	0.090849	MG
chr17:21699250-21699750	chst15	0.871512167293479	chst15::Inter	4.73033	4.55327e-08	0.285893	MG	1.49663	0.0583433	0.0369495	MG
chr17:21711450-21711950	chst15	0.873217169449244	chst15::Inter	4.13774	5.32645e-09	0.291428	MG	4.35083	9.65231e-12	0.311925	MG
chr17:22956194-22956694	ltbp1	0.807180894946315	ltbp1::TSS	2.66176	0.0183811	0.0843326	MG	3.25857	0.00756657	0.0632616	MG
chr17:22956745-22957245	ltbp1	0.830339503770035	ltbp1::TSS	3.47627	0.000410742	0.115563	MG	1.83878	0.0860205	0.0372556	MG
chr17:22957864-22958364	ltbp1	0.794884518798697	ltbp1::Body	3.64238	0.000107475	0.148512	MG	4.97181	0.0046515	0.0611286	MG
chr17:22967172-22967672	ltbp1	0.825498161061692	ltbp1::Body	3.57363	0.00273837	0.0658705	MG	5.76853	6.9296e-06	0.107672	MG
chr17:22976231-22976731	ltbp1	0.486861873787688	ltbp1::Body	0.982316	0.242841	0.0642167	MG	1.25298	0.244609	0.042609	MG
chr17:22978547-22979047	ltbp1	0.867301398398291	ltbp1::Body	2.61087	0.000975051	0.133601	MG	5.18387	1.94773e-07	0.164006	MG
chr17:22979086-22979586	ltbp1	0.803896924682093	ltbp1::Body	4.15334	0.0960388	0.0337913	MG	5.23063	0.00188778	0.0735356	MG
chr17:23068554-23069054	ltbp1	0.599002524434432	ltbp1::Body	3.03816	0.126277	0.0400313	MG	3.05777	0.114629	0.0560793	MG
chr17:23076103-23076603	ltbp1	0.90094203840452	ltbp1::Body	2.60371	3.62516e-07	0.241599	MG	5.19248	0.0046515	0.071564	MG
chr17:23076855-23077355	ltbp1	0.664640221587618	ltbp1::Body	2.18836	0.0905535	0.0531829	MG	2.66693	0.286902	0.0180839	MG
chr17:23081942-23082442	ltbp1	0.917158994619403	ltbp1::Body	4.7964	1.33363e-14	0.401727	MG	4.66833	2.8919e-06	0.170353	MG
chr17:23102179-23102679	ltbp1	0.651085782991966	ltbp1::Body	2.3764	0.279546	0.0599555	MG	1.51345	0.310992	0.0388986	MG
chr17:23116268-23116768	ltbp1	0.406221400137142	ltbp1::Body	2.19647	0.10544	0.135187	MG	1.85854	0.00183276	0.13154	MG
chr17:23122032-23122532	ltbp1	0.88038156044573	ltbp1::Inter;rasgrp3::Inter	1.27297	3.26077e-05	0.242025	MG	3.61826	1.8063e-12	0.314989	MG
chr17:23122032-23122532	rasgrp3	0.88038156044573	ltbp1::Inter;rasgrp3::Inter	1.27297	3.26077e-05	0.242025	MG	3.61826	1.8063e-12	0.314989	MG
chr17:23143379-23143879	ltbp1	0.859446407634877	ltbp1::Inter	3.18033	1.40983e-11	0.531783	MG	2.0658	2.77046e-07	0.240873	MG
chr17:23146657-23147157	rasgrp3	0.697336992818116	rasgrp3::TSS	1.16085	0.156128	0.0869046	MG	1.44978	0.12095	0.0499931	MG
chr17:25196891-25197391	arhgef10	0.736244648492971	arhgef10::TSS	0.961429	0.00300794	0.214179	MG	1.49054	0.000476129	0.251822	MG
chr17:25226826-25227326	arhgef10	0.860521634572051	arhgef10::Body	1.22464	0.0915324	0.241545	MG	1.64675	0.0846605	0.091993	MG
chr17:27234882-27235382	asap3	ND	asap3::TSS	2.11077	0.30266	0.0205526	MG	2.25461	0.286902	0.0291655	MG
chr17:27235530-27236030	asap3	0.760241942883737	asap3::TSS	2.68222	0.000522416	0.185349	MG	2.58824	1.55398e-05	0.187342	MG
chr17:27270443-27270943	id3	0.577952084379513	id3::Inter	1.15706	0.131569	0.094225	MG	0.340415	0.286902	0.0368259	MG
chr17:27271756-27272256	id3	0.69089273844501	id3::Body	0.951626	0.180027	0.0858191	MG	1.44292	0.0836131	0.0575769	MG
chr17:27273130-27273630	id3	0.686468689653939	id3::TSS	0.946323	0.00177922	0.379586	MG	0.430984	0.0404788	0.196864	MG
chr17:27416196-27416696	asap3	0.731483473040016	asap3::Inter;id3::Inter	3.07834	7.68324e-13	0.506812	MG	3.60736	6.12753e-11	0.276976	MG
chr17:27416196-27416696	id3	0.731483473040016	asap3::Inter;id3::Inter	3.07834	7.68324e-13	0.506812	MG	3.60736	6.12753e-11	0.276976	MG
chr17:27723118-27723618	qkia	0.32044592607209	qkia::TSS	0.861022	0.00683919	0.581008	MG	0.371355	0.176844	0.26553	MG
chr17:27735375-27735875	qkia	0.759361231535379	qkia::Body	1.34626	0.0276938	0.0626785	MG	2.13172	0.00045518	0.119836	MG
chr17:27749365-27749865	qkia	0.791572421553651	qkia::Body	2.18912	0.0033925	0.104383	MG	3.23599	7.92279e-06	0.200425	MG
chr17:27904453-27904953	qkia	0.854892262175831	qkia::Inter	4.29048	2.45682e-22	0.821319	MG	4.91176	1.24198e-24	0.549118	MG
chr17:27912383-27912883	qkia	0.831716852648295	qkia::Inter	6.153	6.53154e-14	0.38601	MG	2.13345	0.144336	0.0525495	MG
chr17:27942529-27943029	qkia	0.644761954216625	qkia::Inter	3.94239	0.0102231	0.0559508	MG	3.98773	0.0860205	0.0299086	MG
chr17:27949886-27950386	qkia	0.459177732214871	qkia::Inter	2.1032	0.0198115	0.0599252	MG	1.5027	0.318094	0.0340102	MG
chr17:27953076-27953576	qkia	0.725476200581285	qkia::Inter	2.7607	0.00657673	0.132249	MG	0.974658	0.121298	0.0543525	MG
chr17:31656171-31656671	vsx2	0.794962908715234	vsx2::Body	1.71862	0.00508391	0.250418	MG	0.869201	0.0184126	0.110965	MG
chr17:31658904-31659404	vsx2	0.709182084957368	vsx2::Body	1.08223	0.0114176	0.0971135	MG	1.9906	8.31257e-05	0.214752	MG
chr17:31659417-31659917	vsx2	0.868407183303508	vsx2::TSS	1.62333	3.41254e-06	0.310914	MG	1.57499	6.13639e-06	0.24769	MG
chr17:31661732-31662232	vsx2	0.727338876789469	vsx2::Inter	2.58521	0.00102108	0.115449	MG	2.44583	1.04189e-05	0.168818	MG
chr17:31662264-31662764	vsx2	0.430559427284154	vsx2::Inter	0.505513	0.180027	0.0246681	MG	0.530921	0.318094	0.0605682	MG
chr17:32128863-32129363	dhx32b	0.44113483013155	dhx32b::Inter	3.16946	1.92249e-07	0.173167	MG	2.21655	0.00886542	0.0625516	MG
chr17:32207537-32208037	dhx32b	0.345289027849431	dhx32b::Inter	3.40611	6.72334e-05	0.167594	MG	5.30744	0.0011973	0.0776665	MG
chr17:32350334-32350834	eva1a	0.565075352602462	eva1a::Inter	2.14254	2.68125e-10	0.541013	MG	4.15692	7.33642e-15	0.399116	MG
chr17:32364841-32365341	dhx32b	0.514522710500082	dhx32b::Inter;eva1a::Inter	1.01945	0.0225897	0.132451	MG	0.641458	0.239296	0.0650552	MG
chr17:32364841-32365341	eva1a	0.514522710500082	dhx32b::Inter;eva1a::Inter	1.01945	0.0225897	0.132451	MG	0.641458	0.239296	0.0650552	MG
chr17:32399016-32399516	ctsba	0.546789643292699	ctsba::Inter	1.36143	0.279546	0.0665841	MG	3.35307	0.0115155	0.075938	MG
chr17:32568240-32568740	dhx32b	0.735793801430157	dhx32b::Inter;eva1a::Inter	2.18455	0.00239398	0.0785975	MG	2.19162	0.00894408	0.0742887	MG
chr17:32568240-32568740	eva1a	0.735793801430157	dhx32b::Inter;eva1a::Inter	2.18455	0.00239398	0.0785975	MG	2.19162	0.00894408	0.0742887	MG
chr17:32568759-32569259	dhx32b	0.858868164981874	dhx32b::Inter;eva1a::Inter	2.32129	7.53802e-12	0.385013	MG	3.13689	1.2563e-12	0.317777	MG
chr17:32568759-32569259	eva1a	0.858868164981874	dhx32b::Inter;eva1a::Inter	2.32129	7.53802e-12	0.385013	MG	3.13689	1.2563e-12	0.317777	MG
chr17:32571301-32571801	eva1a	0.871845763254271	eva1a::TSS	1.7046	5.82235e-05	0.131519	MG	2.29453	0.00243739	0.148648	MG
chr17:32643794-32644294	prox1a	0.361022042276288	prox1a::Inter	3.96792	5.35323e-05	0.157386	MG	3.57061	0.0860205	0.0218937	MG
chr17:32822060-32822560	ctsba	0.687745805080132	ctsba::Inter	2.71567	0.00382036	0.10488	MG	2.41842	0.0583433	0.0809574	MG
chr17:32846103-32846603	prox1a	0.538168745010606	prox1a::Body	4.10197	1.15718e-22	0.745713	MG	3.38407	1.80176e-14	0.461238	MG
chr17:32849364-32849864	prox1a	0.602987501276858	prox1a::Body	1.73478	0.141938	0.0496034	MG	1.58737	0.0139787	0.0843037	MG
chr17:32850157-32850657	prox1a	0.614461205195004	prox1a::Body	1.95608	8.63117e-06	0.28293	MG	1.16808	0.00023354	0.248982	MG
chr17:32862514-32863014	prox1a	0.772940027599922	prox1a::Body	0.632611	0.124168	0.0387992	MG	2.75252	2.94819e-08	0.219421	MG
chr17:32863349-32863849	prox1a	0.610275751032797	prox1a::TSS	1.40699	0.279546	0.0380814	MG	2.48805	0.0128631	0.0523806	MG
chr17:32865245-32865745	prox1a	0.68816959878067	prox1a::TSS	1.54985	0.247469	0.0926591	MG	2.00879	0.000212112	0.0974461	MG
chr17:32865747-32866247	prox1a	0.842374306158132	prox1a::TSS	0.888241	0.0509718	0.189126	MG	1.12333	2.68887e-06	0.270167	MG
chr17:34168938-34169438	mpp5a	0.549504939809324	mpp5a::Inter	2.34798	0.00604763	0.0758273	MG	3.68099	0.0860205	0.0237946	MG
chr17:34227777-34228277	mpp5a	0.643135928163106	mpp5a::Body	2.14338	0.123619	0.0441839	MG	2.68018	0.223521	0.0294017	MG
chr17:34413606-34414106	mpp5a	0.576262981559989	mpp5a::Inter	1.03062	0.00033791	0.0843602	MG	3.47071	0.00132601	0.0886315	MG
chr17:36830378-36830878	myo6b	0.611491805729957	myo6b::Body	2.85967	9.97651e-12	0.402099	MG	5.61213	3.09019e-07	0.156606	MG
chr17:37682882-37683382	plekhh1	0.404519894134695	plekhh1::Inter	0.657455	0.25125	0.0792458	MG	2.74569	5.14311e-05	0.174565	MG
chr17:37706368-37706868	plekhh1	0.813599849842549	plekhh1::Inter	2.80409	4.78037e-09	0.380204	MG	3.36278	6.52607e-07	0.176411	MG
chr17:37712099-37712599	plekhh1	0.860733789692042	plekhh1::Inter	2.03436	0.000340495	0.180975	MG	1.09015	0.00105784	0.0984453	MG
chr17:37712610-37713110	plekhh1	0.65375086321213	plekhh1::Inter	2.78336	0.0391982	0.0915234	MG	1.62526	0.302439	0.03476	MG
chr17:37740640-37741140	plekhh1	0.7497282608993	plekhh1::Inter	1.79902	3.26378e-06	0.257125	MG	2.11014	4.38034e-06	0.236544	MG
chr17:37757940-37758440	plekhh1	0.556021481084533	plekhh1::Inter	0.543657	0.0594743	0.258303	MG	1.54538	2.72878e-13	0.587094	MG
chr17:37761493-37761993	plekhh1	0.538686120191609	plekhh1::Inter	1.96522	0.0105301	0.141586	MG	1.22549	0.0594883	0.0346459	MG
chr17:37765434-37765934	plekhh1	0.820781198744143	plekhh1::Inter	2.05732	3.33072e-09	0.426607	MG	2.10628	3.43845e-13	0.454211	MG
chr17:37766339-37766839	plekhh1	0.838834518596626	plekhh1::Inter	0.68303	0.00979775	0.0555907	MG	2.76446	0.001056	0.109557	MG
chr17:37770740-37771240	plekhh1	0.726982756747486	plekhh1::Inter	1.45526	0.084922	0.0824799	MG	2.13525	1.68409e-06	0.152238	MG
chr17:37771308-37771808	plekhh1	0.82319792652907	plekhh1::Inter	3.6957	1.38814e-18	0.653427	MG	5.72391	6.66587e-20	0.430491	MG
chr17:37902531-37903031	plekhh1	0.794325635721384	plekhh1::Inter	2.38289	0.00822299	0.0736068	MG	1.8255	0.121897	0.025557	MG
chr17:37915181-37915681	plekhh1	0.779239590740602	plekhh1::Inter	1.97192	0.000254918	0.231863	MG	0.76485	0.151273	0.0588377	MG
chr17:37915682-37916182	plekhh1	0.691872747697422	plekhh1::Inter	2.45913	0.000283214	0.108202	MG	2.79745	8.57668e-06	0.169081	MG
chr17:37929689-37930189	plekhh1	0.734104153446197	plekhh1::Inter	2.12005	0.218679	0.052869	MG	2.06477	0.0261846	0.115829	MG
chr17:37932415-37932915	plekhh1	0.820245090834553	plekhh1::TSS	2.24688	0.000412772	0.16367	MG	2.93273	2.07057e-05	0.165884	MG
chr17:37961281-37961781	plekhh1	0.902953437607574	plekhh1::Body	1.60538	0.00561516	0.160222	MG	3.65027	1.59895e-12	0.351948	MG
chr17:38115146-38115646	plekhh1	0.495663514421329	plekhh1::Inter	2.76812	0.0629253	0.0811316	MG	3.088	0.22082	0.0258092	MG
chr17:39082937-39083437	crim1	0.467101514796495	crim1::Body	1.90777	0.217376	0.0478786	MG	4.20452	0.0227658	0.0514205	MG
chr17:39161680-39162180	crim1	0.619450471282055	crim1::Body	3.31315	0.0161616	0.083971	MG	3.24374	0.242658	0.0170473	MG
chr17:39183934-39184434	crim1	0.669086284406275	crim1::TSS	1.41803	0.224562	0.0580912	MG	1.65198	0.161848	0.0768755	MG
chr17:39184651-39185151	crim1	0.882805065681993	crim1::Body	1.06452	0.0147962	0.147367	MG	2.13617	5.90788e-06	0.202259	MG
chr17:39203570-39204070	crim1	0.783668131276032	crim1::Inter	2.29938	1.07847e-06	0.159458	MG	6.19082	3.71939e-14	0.324626	MG
chr17:39205769-39206269	crim1	0.722209397831706	crim1::Inter	4.56357	0.00421597	0.0868247	MG	6.2836	9.78355e-07	0.154734	MG
chr17:42674472-42674972	prkd3	0.723283357324786	prkd3::Body	2.8444	0.000171371	0.111263	MG	2.80617	0.286902	0.0221576	MG
chr17:42798838-42799338	prkd3	0.732479643883969	prkd3::TSS	1.39552	0.0684622	0.103582	MG	1.55982	0.082508	0.0519938	MG
chr17:51415787-51416287	pxdn	0.84015860022189	pxdn::Inter	2.67364	0.00803171	0.124251	MG	1.84571	0.0391242	0.0336648	MG
chr17:51519714-51520214	pxdn	0.844053818647327	pxdn::TSS	2.80027	1.3318e-06	0.300455	MG	2.83191	2.81697e-05	0.229219	MG
chr17:51520694-51521194	pxdn	0.689776608256528	pxdn::TSS	1.45558	0.132277	0.0875616	MG	1.81933	0.0479333	0.0752716	MG
chr17:51522238-51522738	pxdn	0.868565719369509	pxdn::Body	3.69636	0.00541453	0.113802	MG	2.71774	0.0185119	0.0671176	MG
chr17:51621017-51621517	pxdn	0.89697995026247	pxdn::Inter	3.25058	1.52511e-10	0.36536	MG	5.75404	7.59954e-10	0.191932	MG
chr17:51857314-51857814	tgfb3	0.359850356889211	tgfb3::Inter	2.46271	2.96022e-07	0.28861	MG	1.12065	0.314853	0.0412216	MG
chr17:51951382-51951882	tgfb3	0.784041873333909	tgfb3::Inter	1.28598	0.098379	0.0640686	MG	3.1715	0.000702351	0.0582938	MG
chr17:51951890-51952390	tgfb3	0.834942121956712	tgfb3::Inter	2.64406	0.00808315	0.0999206	MG	3.21807	0.00648166	0.0622185	MG
chr17:51957400-51957900	tgfb3	0.849017386997767	tgfb3::Inter	3.94295	0.00169743	0.0753975	MG	2.32386	0.164765	0.0499664	MG
chr17:51967156-51967656	tgfb3	0.777354312488786	tgfb3::Inter	2.58925	0.00747492	0.143925	MG	2.43123	0.0860205	0.0634948	MG
chr17:52090616-52091116	tgfb3	0.804584596601454	tgfb3::TSS	1.16033	0.0100468	0.0789219	MG	2.77611	0.000128344	0.117576	MG
chr17:52091149-52091649	tgfb3	0.813079466213626	tgfb3::TSS	0.94584	0.00388973	0.320642	MG	1.87926	9.51047e-10	0.346075	MG
chr17:6279643-6280143	BX000363.2	0.707756667197654	BX000363.2::Body	1.85804	0.248179	0.0252591	MG	2.68234	0.00163664	0.119724	MG
chr17:6325227-6325727	BX000363.2	0.410146378796991	BX000363.2::Inter	2.14924	0.0421261	0.054443	MG	1.57898	0.00260688	0.0890628	MG
chr17:9091975-9092475	NPAS3	0.707575952974595	NPAS3::Inter	2.26351	0.000191665	0.120499	MG	3.58699	0.000532694	0.10714	MG
chr17:9120451-9120951	NPAS3	0.700842900603603	NPAS3::Inter	4.15979	0.00168242	0.0811404	MG	4.3216	0.000143739	0.121385	MG
chr17:9127207-9127707	NPAS3	0.58529102714684	NPAS3::Inter	1.7549	0.171833	0.0593626	MG	3.47946	0.00234621	0.133485	MG
chr17:9173643-9174143	NPAS3	0.700265815390317	NPAS3::Inter	1.37222	0.0431601	0.0496961	MG	3.4772	9.69302e-07	0.168897	MG
chr17:9186738-9187238	NPAS3	0.825166283262325	NPAS3::Inter	1.90641	0.000136786	0.113951	MG	1.86613	0.0376037	0.0705198	MG
chr17:9203435-9203935	NPAS3	0.856357186823882	NPAS3::Inter	3.06594	1.22881e-07	0.23541	MG	2.56491	7.91394e-14	0.461886	MG
chr17:9310208-9310708	NPAS3	0.82254476105587	NPAS3::TSS	0.953005	0.0636434	0.0815348	MG	1.68732	0.05238	0.148101	MG
chr17:9311718-9312218	NPAS3	ND	NPAS3::TSS	2.10784	0.279546	0.00666085	MG	1.23558	0.289246	0.0145784	MG
chr17:9312417-9312917	NPAS3	0.610842668286326	NPAS3::Body	3.40007	0.0181746	0.0633968	MG	4.19193	0.0391242	0.0347618	MG
chr17:9522582-9523082	NPAS3	0.707526768650709	NPAS3::Body	2.39374	0.0632717	0.0588829	MG	2.20151	0.22082	0.0317203	MG
chr18:13224121-13224621	cotl1	0.551450453690182	cotl1::Inter	2.43081	0.0163533	0.0588951	MG	4.35345	0.0583433	0.0391182	MG
chr18:13226221-13226721	cotl1	0.817771436970889	cotl1::Inter	2.99739	6.69295e-08	0.35857	MG	5.38408	5.70175e-14	0.341955	MG
chr18:13233178-13233678	cotl1	0.560076512420964	cotl1::Inter	1.08804	0.0370653	0.090596	MG	0.953697	0.22082	0.0648663	MG
chr18:14941637-14942137	mlc1	0.948647319212434	mlc1::TSS	3.00555	5.26197e-07	0.300338	MG	3.54348	0.00267663	0.0776378	MG
chr18:14944036-14944536	btbd11b	0.946123547524482	btbd11b::Inter;mlc1::Inter	3.29676	4.85649e-12	0.402507	MG	3.62447	6.10568e-07	0.145426	MG
chr18:14944036-14944536	mlc1	0.946123547524482	btbd11b::Inter;mlc1::Inter	3.29676	4.85649e-12	0.402507	MG	3.62447	6.10568e-07	0.145426	MG
chr18:14944662-14945162	btbd11b	0.84787347744614	btbd11b::Inter;mlc1::Inter	3.29544	7.05297e-06	0.10368	MG	3.21831	0.125737	0.0167142	MG
chr18:14944662-14945162	mlc1	0.84787347744614	btbd11b::Inter;mlc1::Inter	3.29544	7.05297e-06	0.10368	MG	3.21831	0.125737	0.0167142	MG
chr18:14984050-14984550	btbd11b	0.765203572478766	btbd11b::Body	2.95908	0.000426323	0.143408	MG	2.14714	0.00374807	0.10999	MG
chr18:14991001-14991501	btbd11b	0.790727603241737	btbd11b::Body	3.06112	0.0181746	0.0693674	MG	4.92466	0.00296971	0.0590983	MG
chr18:14995149-14995649	btbd11b	0.709458970154737	btbd11b::Body	1.36379	0.0996845	0.070971	MG	3.80264	1.75568e-09	0.275564	MG
chr18:15075731-15076231	btbd11b	0.895051805264766	btbd11b::Body	3.34872	1.44976e-09	0.246308	MG	5.25421	7.32077e-08	0.178371	MG
chr18:15090146-15090646	btbd11b	0.776488970629199	btbd11b::Body	3.09004	0.000447961	0.232976	MG	4.14727	7.62155e-08	0.23181	MG
chr18:15100380-15100880	btbd11b	0.717229581019673	btbd11b::TSS	0.730639	0.177727	0.0364862	MG	2.12691	0.00405814	0.0901149	MG
chr18:15101115-15101615	btbd11b	0.696083517069972	btbd11b::TSS	1.78174	0.00466428	0.116498	MG	1.58569	0.00827047	0.0992086	MG
chr18:15103102-15103602	btbd11b	0.630931722617034	btbd11b::Body	1.89479	0.047925	0.105428	MG	1.58879	0.090045	0.0557911	MG
chr18:15106030-15106530	btbd11b	0.352696361489679	btbd11b::TSS	1.0025	0.0779706	0.176988	MG	0.720918	0.164765	0.118235	MG
chr18:15390587-15391087	ppfibp1b	0.736662273344998	ppfibp1b::Inter	3.00519	8.99086e-05	0.106946	MG	2.4379	0.0191955	0.067547	MG
chr18:15405321-15405821	ppfibp1b	0.669631717706131	ppfibp1b::Inter	2.302	1.40404e-08	0.426627	MG	1.55093	4.02848e-05	0.107647	MG
chr18:15550634-15551134	ppfibp1b	0.738279995697393	ppfibp1b::Body	1.53717	0.242081	0.066837	MG	1.44912	0.267895	0.030679	MG
chr18:15551221-15551721	ppfibp1b	0.773458063082378	ppfibp1b::TSS	2.10686	4.5872e-06	0.256788	MG	1.66837	0.0232434	0.174757	MG
chr18:15884260-15884760	plekhg7	0.767130788490716	plekhg7::Inter	2.57878	0.085584	0.033828	MG	3.72576	0.242658	0.024608	MG
chr18:15885343-15885843	plekhg7	0.847440169329992	plekhg7::Inter	2.6767	0.000887099	0.0859623	MG	5.06233	0.00296971	0.0652168	MG
chr18:15899083-15899583	plekhg7	ND	plekhg7::TSS	1.17133	0.126472	0.0210135	MG	3.04461	0.114306	0.0296744	MG
chr18:15899779-15900279	plekhg7	ND	plekhg7::TSS	1.5684	0.126438	0.0230165	MG	3.21186	0.161848	0.0292904	MG
chr18:15900403-15900903	plekhg7	ND	plekhg7::TSS	3.34588	0.0960388	0.0184454	MG	4.41953	0.0260605	0.0410459	MG
chr18:15901805-15902305	plekhg7	0.531180070201684	plekhg7::Body	2.4802	0.180027	0.0386885	MG	2.88513	0.22082	0.0210227	MG
chr18:15911248-15911748	plekhg7	0.936633887670218	plekhg7::TSS	3.50347	1.48884e-10	0.385723	MG	4.98084	1.03192e-09	0.236081	MG
chr18:15913201-15913701	plekhg7	0.78831134129663	plekhg7::Body	2.76592	7.15849e-05	0.121142	MG	4.5245	0.000503618	0.107905	MG
chr18:15913758-15914258	plekhg7	0.810045672223441	plekhg7::Body	4.56032	0.0102009	0.0754296	MG	2.50596	0.342964	0.0305106	MG
chr18:15922049-15922549	plekhg7	0.848454152106507	plekhg7::Body	2.69685	0.000465865	0.107388	MG	4.36569	2.00112e-05	0.130938	MG
chr18:15931283-15931783	plekhg7	0.680539953580522	plekhg7::TSS	2.47684	0.0381013	0.0345741	MG	2.25668	0.120406	0.0304896	MG
chr18:15931800-15932300	plekhg7	0.793074450658739	plekhg7::TSS	2.68211	0.00453718	0.106132	MG	1.70691	0.00503542	0.0795771	MG
chr18:15932315-15932815	plekhg7	0.896862964380865	plekhg7::TSS	1.72817	2.86138e-08	0.328693	MG	1.86656	1.96221e-09	0.399005	MG
chr18:15935301-15935801	itpr2	0.771525794043974	itpr2::TSS	2.49685	0.0421261	0.0669323	MG	3.25804	0.000142901	0.107114	MG
chr18:15937064-15937564	itpr2	0.764733851014603	itpr2::TSS	2.60519	0.0360423	0.0857996	MG	3.27501	0.0122039	0.0936879	MG
chr18:15937638-15938138	itpr2	0.713711758112483	itpr2::Body	1.46373	0.0393867	0.0593313	MG	1.55877	0.287592	0.0232056	MG
chr18:15966150-15966650	itpr2	0.699369536751684	itpr2::Body	4.66431	0.0117654	0.049008	MG	4.42475	0.0583433	0.0412022	MG
chr18:16109056-16109556	itpr2	0.868300427387936	itpr2::Inter;plekhg7::Inter	1.49186	0.0190382	0.0823644	MG	2.73788	0.242658	0.0114102	MG
chr18:16109056-16109556	plekhg7	0.868300427387936	itpr2::Inter;plekhg7::Inter	1.49186	0.0190382	0.0823644	MG	2.73788	0.242658	0.0114102	MG
chr18:16133404-16133904	ctsd	ND	ctsd::TSS	1.20508	0.0117654	0.294024	MG	0.532956	0.225078	0.100973	MG
chr18:17533776-17534276	mt2	0.703847199504312	mt2::TSS	1.38342	7.21493e-06	0.199578	MG	1.17119	0.0151503	0.0972971	MG
chr18:17534306-17534806	mt2	0.82006330090186	mt2::TSS	3.64473	2.54682e-16	0.592609	MG	2.26536	5.96211e-06	0.153029	MG
chr18:19424881-19425381	smad6b	0.479842741903996	smad6b::Inter	1.20518	0.09303	0.0303171	MG	3.06434	0.318094	0.0148186	MG
chr18:19500593-19501093	smad6b	0.74751027248818	smad6b::Inter	3.667	0.279546	0.0235455	MG	1.38292	0.286902	0.0472394	MG
chr18:19520852-19521352	smad6b	0.900326293320875	smad6b::Inter	2.61486	1.66704e-08	0.383441	MG	2.84129	1.02284e-09	0.312125	MG
chr18:19645824-19646324	smad6b	0.769168378027852	smad6b::TSS	1.38002	0.00250774	0.125873	MG	3.20743	0.000976012	0.0957654	MG
chr18:19647921-19648421	smad6b	0.90694277616676	smad6b::TSS	2.00521	8.61758e-07	0.355088	MG	1.38604	0.000222538	0.205265	MG
chr18:19650527-19651027	smad6b	0.871955590404655	smad6b::Body	3.27666	1.1661e-05	0.176624	MG	2.12374	0.000116468	0.13937	MG
chr18:19651033-19651533	smad6b	0.56037406301724	smad6b::Body	1.36272	0.0763939	0.0554672	MG	3.12443	0.01828	0.0708121	MG
chr18:19669681-19670181	smad6b	0.680825394244717	smad6b::Body	2.15678	0.0373467	0.122423	MG	2.26924	0.00325407	0.126549	MG
chr18:19672406-19672906	smad6b	0.320610214951462	smad6b::Body	0.606515	0.299272	0.0379785	MG	3.64245	3.37765e-07	0.185968	MG
chr18:19751150-19751650	smad6b	0.437126749883083	smad6b::Inter	2.15368	0.139918	0.0793597	MG	1.66266	0.0592352	0.040281	MG
chr18:20046985-20047485	uacaa	0.692839276453561	uacaa::TSS	1.211	0.012769	0.223657	MG	1.48009	0.000223674	0.300106	MG
chr18:20047645-20048145	uacaa	0.657179194282082	uacaa::Body	3.68876	0.0850825	0.0368462	MG	1.5297	0.122752	0.0467714	MG
chr18:20219841-20220341	uacaa	0.700521096374748	uacaa::Inter	1.76204	8.71091e-08	0.464158	MG	1.60461	2.05436e-07	0.38469	MG
chr18:20222911-20223411	uacaa	0.715318099605827	uacaa::Inter	2.87439	2.93659e-06	0.310551	MG	2.15994	8.37681e-10	0.281941	MG
chr18:22503494-22503994	bcar1	0.658952143611936	bcar1::TSS	1.49737	0.284536	0.0732495	MG	0.812964	0.238345	0.0478327	MG
chr18:22577050-22577550	bcar1	0.507303673056042	bcar1::Body	3.11661	0.00515728	0.093732	MG	2.10921	0.05916	0.0455536	MG
chr18:22590113-22590613	bcar1	0.369915575098037	bcar1::Body	1.17711	0.247095	0.0417479	MG	2.13168	0.00591619	0.102909	MG
chr18:22623610-22624110	bcar1	0.568870796558461	bcar1::Body	2.10036	1.39793e-05	0.182077	MG	2.87445	1.87802e-26	0.678398	MG
chr18:22624325-22624825	bcar1	0.515803644718425	bcar1::Body	2.30767	0.1262	0.0512737	MG	3.09009	0.000173537	0.108228	MG
chr18:23085726-23086226	mef2aa	0.525487819548197	mef2aa::Inter	3.03587	0.0379145	0.0459467	MG	2.67066	0.285457	0.0609045	MG
chr18:23194199-23194699	mef2aa	0.42322754950348	mef2aa::TSS	1.5063	0.27569	0.0417636	MG	0.771187	0.318094	0.0306344	MG
chr18:23250982-23251482	mef2aa	0.342728020188733	mef2aa::Body	1.69335	0.0132412	0.07203	MG	2.34479	0.142697	0.0625694	MG
chr18:23264669-23265169	mef2aa	0.398051322328727	mef2aa::Body	0.812123	0.180027	0.129232	MG	1.98615	9.40801e-09	0.390585	MG
chr18:23275030-23275530	mef2aa	0.553110966065492	mef2aa::Body	3.14068	1.85741e-05	0.203255	MG	3.55886	1.47758e-07	0.185522	MG
chr18:27000766-27001266	pik3c2a	0.784940085000264	pik3c2a::TSS	1.15559	0.00476238	0.189073	MG	1.59019	0.0163708	0.103926	MG
chr18:27026167-27026667	pik3c2a	0.843747657772815	pik3c2a::Body	3.35898	0.00134728	0.0867887	MG	3.39547	0.0860205	0.0191608	MG
chr18:27026676-27027176	pik3c2a	0.944580225650705	pik3c2a::Body	2.7687	5.93575e-12	0.304906	MG	5.73726	0.00188778	0.10532	MG
chr18:35742302-35742802	rasgrp4	0.917100036419797	rasgrp4::TSS	3.96649	2.02658e-05	0.134838	MG	3.39313	0.0523198	0.0364698	MG
chr18:35745726-35746226	rasgrp4	0.948573995563789	rasgrp4::Body	6.42768	5.58498e-14	0.413637	MG	2.90807	0.000573092	0.0835062	MG
chr18:35756235-35756735	rasgrp4	0.80770642639337	rasgrp4::Body	2.19586	0.000446851	0.0645828	MG	5.14261	0.00029931	0.0690638	MG
chr18:35756748-35757248	rasgrp4	0.966533114759373	rasgrp4::Body	4.49792	9.05199e-15	0.450809	MG	4.8548	1.2569e-14	0.347965	MG
chr18:35970420-35970920	rasgrp4	0.656596163569669	rasgrp4::Inter	3.45604	0.00432677	0.0600046	MG	4.48919	0.000198847	0.107095	MG
chr18:37354880-37355380	yap1	0.739493751810578	yap1::Body	0.601979	0.0114521	0.041319	MG	0.45676	0.078751	0.0184454	MG
chr18:37355462-37355962	yap1	0.908697887392625	yap1::TSS	1.52768	4.48515e-06	0.252553	MG	3.51266	9.22849e-12	0.331373	MG
chr18:40144680-40145180	sema6dl	0.790441746138061	sema6dl::Inter	2.5222	7.0379e-13	0.46794	MG	2.17886	1.61861e-11	0.418628	MG
chr18:40147051-40147551	sema6dl	0.609469010485932	sema6dl::Inter	2.37435	0.183695	0.0399472	MG	2.24832	0.121298	0.0376791	MG
chr18:40169186-40169686	sema6dl	0.812924065087698	sema6dl::Inter	2.80172	0.000168662	0.259703	MG	1.43109	0.00354475	0.0806652	MG
chr18:40217422-40217922	sema6dl	0.789090141913686	sema6dl::Inter	2.46741	3.09435e-11	0.309642	MG	5.84951	1.6664e-10	0.257943	MG
chr18:40221776-40222276	sema6dl	0.831983387001119	sema6dl::Inter	3.20168	1.0538e-07	0.301718	MG	4.57645	2.48548e-07	0.17355	MG
chr18:40222346-40222846	sema6dl	0.637935092589234	sema6dl::Inter	3.46192	0.0181746	0.053235	MG	2.68494	0.0855506	0.0486384	MG
chr18:40326592-40327092	sema6dl	0.854026287146749	sema6dl::Inter	2.19806	0.00104226	0.177066	MG	2.59	5.19939e-17	0.456687	MG
chr18:40333522-40334022	sema6dl	0.443558666053141	sema6dl::Inter	1.07608	0.247469	0.0272163	MG	2.07406	0.00114748	0.099568	MG
chr18:40354590-40355090	sema6dl	0.895326488500548	sema6dl::TSS	1.54308	1.13073e-05	0.28923	MG	1.19357	0.000572392	0.21249	MG
chr18:40355139-40355639	sema6dl	0.813056624635628	sema6dl::TSS	1.1377	0.23904	0.110539	MG	0.767819	0.099034	0.0987689	MG
chr18:40484161-40484661	sema6dl	0.578730790432822	sema6dl::Inter	5.7686	3.82543e-09	0.19414	MG	3.27774	0.161848	0.030446	MG
chr18:41314270-41314770	veph1	0.567583519252451	veph1::Body	1.61744	0.204649	0.0448384	MG	1.95078	0.148252	0.0438985	MG
chr18:41331005-41331505	veph1	0.697353820400736	veph1::Body	1.49981	0.281397	0.0550259	MG	3.89573	0.00640972	0.076297	MG
chr18:41337441-41337941	veph1	0.757863002591839	veph1::Body	2.26431	0.00390521	0.10334	MG	3.36003	0.0152224	0.0501159	MG
chr18:41459554-41460054	veph1	0.68056211206078	veph1::Body	4.16507	0.0852325	0.0679959	MG	3.10902	0.22082	0.0283849	MG
chr18:43968840-43969340	cdon	0.783376862355951	cdon::Inter	2.34793	0.00419962	0.133366	MG	0.835069	0.289856	0.0186981	MG
chr18:44043588-44044088	cdon	0.892273833215382	cdon::Inter	1.10288	0.172304	0.0868657	MG	2.25277	0.000139	0.193161	MG
chr18:44056811-44057311	cdon	0.786442046417479	cdon::Body	1.12599	0.225475	0.164733	MG	2.99468	7.96282e-09	0.191119	MG
chr18:44128491-44128991	cdon	0.701628837638488	cdon::Body	2.561	0.00773871	0.123335	MG	1.01245	0.161848	0.0561434	MG
chr18:44129039-44129539	cdon	0.891628064411981	cdon::TSS	1.93519	2.93326e-11	0.498965	MG	2.16915	1.68812e-10	0.391847	MG
chr18:44258275-44258775	cdon	0.950971436712704	cdon::Inter	2.89738	1.61969e-26	0.948507	MG	1.59216	1.29224e-07	0.352841	MG
chr18:44260807-44261307	cdon	0.846982729081088	cdon::Inter	3.49016	2.79033e-05	0.173554	MG	2.97703	0.000283436	0.140284	MG
chr18:44275835-44276335	cdon	0.907991948751756	cdon::Inter	2.78866	2.04079e-07	0.216488	MG	2.06315	0.000767284	0.176122	MG
chr18:45541798-45542298	kifc3	0.857171565230789	kifc3::TSS	1.86055	1.98582e-05	0.211897	MG	1.51831	1.28372e-05	0.262984	MG
chr18:45543357-45543857	kifc3	0.709661499733199	kifc3::TSS	3.92064	0.00271369	0.0850881	MG	1.33911	0.226353	0.0335716	MG
chr18:45544037-45544537	kifc3	ND	kifc3::TSS	3.22083	0.1262	0.0372259	MG	0.857371	0.287327	0.00998464	MG
chr18:45547562-45548062	kifc3	0.821580892099058	kifc3::Body	3.41199	6.98318e-05	0.151815	MG	2.37395	1.77239e-06	0.233384	MG
chr18:45550474-45550974	kifc3	0.650377984866172	kifc3::TSS	0.798959	0.034446	0.0948641	MG	1.16261	0.0577096	0.157086	MG
chr18:45593878-45594378	kifc3	0.600817812083943	kifc3::Body	2.16484	0.166692	0.0463551	MG	2.56453	0.0182389	0.077124	MG
chr18:460551-461051	wtip	0.677110189183657	wtip::Body	0.950607	0.000336743	0.189443	MG	1.98048	4.0088e-05	0.277403	MG
chr18:471795-472295	wtip	0.628517288856676	wtip::Body	6.2737	0.000188977	0.153662	MG	1.37344	0.262702	0.0392125	MG
chr18:49101901-49102401	BX663503.3	0.306014788213942	BX663503.3::Body	4.39813	0.0117654	0.0404121	MG	1.46956	0.00171635	0.111327	MG
chr18:49137747-49138247	BX663503.3	0.928711577346394	BX663503.3::Inter;sb:cb81::Inter	5.25977	6.46521e-15	0.426834	MG	4.2939	2.05631e-11	0.266243	MG
chr18:49137747-49138247	sb:cb81	0.928711577346394	BX663503.3::Inter;sb:cb81::Inter	5.25977	6.46521e-15	0.426834	MG	4.2939	2.05631e-11	0.266243	MG
chr18:49162321-49162821	sb:cb81	0.433209048977904	sb:cb81::Inter	1.48185	0.0917519	0.0387925	MG	1.82819	0.242658	0.0454625	MG
chr18:49306510-49307010	sb:cb81	0.699906687451878	sb:cb81::Inter	2.21347	0.0292973	0.0485307	MG	1.96319	0.136713	0.0661691	MG
chr18:49307059-49307559	sb:cb81	0.638999581452323	sb:cb81::Inter	1.72553	0.000624053	0.204925	MG	1.69266	0.000209934	0.210881	MG
chr18:49316617-49317117	sb:cb81	ND	sb:cb81::TSS	3.08943	0.247469	0.0451399	MG	2.75511	0.286902	0.021567	MG
chr18:49317177-49317677	sb:cb81	0.69272093488165	sb:cb81::Body	4.04019	0.062026	0.113293	MG	1.47402	0.22082	0.0162201	MG
chr18:49318018-49318518	sb:cb81	ND	sb:cb81::TSS	3.24418	0.0181746	0.0421206	MG	1.55472	0.167616	0.0255322	MG
chr18:49318629-49319129	sb:cb81	0.922011405417279	sb:cb81::TSS	3.65528	5.32487e-11	0.37362	MG	1.43036	0.000452901	0.218091	MG
chr18:49439830-49440330	sb:cb81	0.403992650590881	sb:cb81::Inter	2.00154	0.17012	0.0402796	MG	2.49416	0.286902	0.0192453	MG
chr18:49441917-49442417	sb:cb81	0.567053334721138	sb:cb81::Inter	2.96225	0.00791717	0.0750257	MG	2.44989	0.121053	0.0444207	MG
chr18:49454145-49454645	sb:cb81	0.697062098298381	sb:cb81::Inter	2.75543	0.180027	0.0497274	MG	2.14824	0.223521	0.0266899	MG
chr18:494862-495362	wtip	0.770441957160757	wtip::TSS	1.36616	0.00308913	0.199052	MG	2.127	1.98033e-07	0.281417	MG
chr19:11196518-11197018	si:dkey-240h12.4	0.938163176938624	si:dkey-240h12.4::Body	3.67927	9.59487e-09	0.292923	MG	5.15851	1.24604e-08	0.231312	MG
chr19:11207989-11208489	si:dkey-240h12.4	0.806185317630113	si:dkey-240h12.4::Body	5.25752	6.38877e-05	0.114884	MG	1.20124	0.318094	0.0205945	MG
chr19:11208521-11209021	si:dkey-240h12.4	0.82744066876306	si:dkey-240h12.4::TSS	2.57851	6.57081e-06	0.243516	MG	1.01375	0.157319	0.039383	MG
chr19:11323785-11324285	si:dkey-240h12.4	0.782790613832683	si:dkey-240h12.4::Inter	2.51952	2.32435e-12	0.519745	MG	2.12849	8.13517e-05	0.171137	MG
chr19:11441975-11442475	si:dkey-240h12.4	0.642545932670117	si:dkey-240h12.4::Inter	3.1984	0.1262	0.034081	MG	1.50532	0.180307	0.0642715	MG
chr19:15147239-15147739	phactr4a	0.624195798179013	phactr4a::Body	2.03253	0.000229382	0.150809	MG	2.75538	0.114511	0.035257	MG
chr19:15189235-15189735	phactr4a	0.568925525055145	phactr4a::Body	4.62021	0.0117654	0.047472	MG	2.52442	0.00152036	0.0897167	MG
chr19:22245130-22245630	pleca	0.720625885846659	pleca::Inter	1.77801	0.139496	0.08329	MG	2.66781	0.318094	0.010774	MG
chr19:22607777-22608277	pleca	0.717443783702188	pleca::Body	4.19826	2.04615e-05	0.185232	MG	2.92107	0.0391242	0.0482136	MG
chr19:22609599-22610099	pleca	0.806446274343247	pleca::TSS	3.19607	0.000109322	0.155862	MG	4.45904	0.0112447	0.0422416	MG
chr19:22612209-22612709	pleca	0.778684900663502	pleca::Body	2.73318	0.00100026	0.155086	MG	2.85906	0.00367638	0.0925669	MG
chr19:22651882-22652382	pleca	0.614697214393462	pleca::Inter	1.84656	0.0381778	0.0389234	MG	2.99233	0.286902	0.0227586	MG
chr19:23224597-23225097	grb10a	0.830189725240886	grb10a::Body	3.66274	5.69046e-09	0.295175	MG	2.31768	0.000676508	0.177309	MG
chr19:23238194-23238694	grb10a	0.632965315125723	grb10a::Body	2.29563	0.13156	0.0314544	MG	2.85118	0.22082	0.0281046	MG
chr19:25750589-25751089	pard6gb	0.751613290228693	pard6gb::Body	0.566198	0.202618	0.0509692	MG	3.0679	0.0013947	0.139372	MG
chr19:25905438-25905938	pard6gb	0.634967085620285	pard6gb::Inter	0.448324	0.0797341	0.096267	MG	1.47142	0.0320378	0.0948713	MG
chr19:25929081-25929581	pard6gb	0.786362534593454	pard6gb::Inter	1.3206	0.00242139	0.282467	MG	1.03697	0.0583433	0.0759611	MG
chr19:31799844-31800344	hey1	0.834714135000584	hey1::Body	2.14615	8.41381e-11	0.516741	MG	2.30263	2.15581e-07	0.243296	MG
chr19:31800502-31801002	hey1	0.758587089276476	hey1::Body	4.11692	0.00168757	0.0574033	MG	3.31892	0.00268492	0.055304	MG
chr19:31802209-31802709	hey1	0.794427071969621	hey1::TSS	1.10415	7.38967e-09	0.663636	MG	0.881611	9.67878e-10	0.669819	MG
chr19:31823462-31823962	hey1	0.755405595012796	hey1::Inter	3.04452	0.000286814	0.190842	MG	2.82204	0.00792521	0.132969	MG
chr19:34860315-34860815	ctnnal1	0.796252314741373	ctnnal1::Body	3.07503	0.000706618	0.0697654	MG	6.37944	1.50219e-09	0.1655	MG
chr19:34873347-34873847	ctnnal1	0.74943448832587	ctnnal1::TSS	0.683642	0.202618	0.0344258	MG	2.67158	0.000675802	0.107385	MG
chr19:3629980-3630480	nedd9	0.731118378155881	nedd9::Inter	2.57279	1.88918e-12	0.446178	MG	1.86103	0.0643064	0.0665171	MG
chr19:3637234-3637734	nedd9	0.75325432020414	nedd9::Inter	2.91209	0.00563803	0.0812192	MG	4.12171	0.00336241	0.0965583	MG
chr19:3653615-3654115	nedd9	0.766552933192758	nedd9::TSS	0.971667	0.0522533	0.214159	MG	1.11923	0.0486825	0.202553	MG
chr19:3655008-3655508	nedd9	0.777884025787531	nedd9::Body	1.23649	0.159477	0.0823011	MG	2.17807	0.00216605	0.153878	MG
chr19:40538141-40538641	calcr	0.598575760391453	calcr::Inter	1.06615	0.279546	0.0495835	MG	1.57705	0.00746591	0.123136	MG
chr19:40540440-40540940	calcr	0.847983336591703	calcr::Inter	2.84441	1.14307e-06	0.275528	MG	4.09832	3.25154e-26	0.666383	MG
chr19:40825665-40826165	calcr	0.65268809625133	calcr::TSS	1.42457	0.0281221	0.0733064	MG	1.64998	0.00415433	0.097153	MG
chr19:40837321-40837821	calcr	0.732593612867372	calcr::Inter	2.75754	0.00160745	0.114797	MG	3.63664	0.0522714	0.0444916	MG
chr19:42588262-42588762	sytl1	0.836488519774078	sytl1::TSS	2.99621	0.000115445	0.129441	MG	2.80242	0.000968595	0.116249	MG
chr19:42607083-42607583	crtap	0.734958614985617	crtap::TSS	2.25137	0.0258248	0.10643	MG	2.13582	0.0230614	0.082729	MG
chr19:42608847-42609347	crtap	0.880976615589333	crtap::TSS	1.97045	1.12171e-06	0.194948	MG	1.74992	1.0552e-06	0.142828	MG
chr19:42628428-42628928	crtap	0.829366807737954	crtap::Inter	2.96256	1.19612e-07	0.243421	MG	2.45066	0.00376957	0.0768027	MG
chr19:46957354-46957854	angpt1	0.812456673463206	angpt1::Body	2.45281	0.00780794	0.111276	MG	5.19289	0.0011973	0.0715846	MG
chr19:46957922-46958422	angpt1	0.884810154942827	angpt1::TSS	2.81117	9.28259e-08	0.247956	MG	3.13971	6.70705e-06	0.139894	MG
chr19:6602653-6603153	pvrl2l	0.736310053537887	pvrl2l::Inter	0.690801	0.158129	0.0358117	MG	3.10302	0.318094	0.015276	MG
chr19:6605697-6606197	pvrl2l	0.619453457885795	pvrl2l::Body	1.87278	0.111144	0.0733776	MG	4.34728	0.0583433	0.0389428	MG
chr19:6641937-6642437	pvrl2l	0.700190876150001	pvrl2l::Body	1.05706	0.115773	0.118241	MG	2.01584	0.027121	0.0541852	MG
chr19:6774855-6775355	pvrl2l	0.608968042372203	pvrl2l::TSS	1.51082	0.0169141	0.138897	MG	0.546279	0.318094	0.0468222	MG
chr2:10218674-10219174	scinlb	0.688249743835717	scinlb::Inter	3.09192	0.00055629	0.157397	MG	1.78925	0.22599	0.0276336	MG
chr2:10294968-10295468	scinlb	0.641611967524431	scinlb::Inter	3.5342	0.0909547	0.104257	MG	3.05508	0.242658	0.0147109	MG
chr2:10450571-10451071	scinlb	0.613696775802363	scinlb::TSS	2.8785	0.120365	0.0709313	MG	4.05539	0.0260605	0.031441	MG
chr2:16253078-16253578	arhgef4	0.684921522711098	arhgef4::Body	1.96105	0.0134531	0.0689309	MG	2.01757	0.000713772	0.0978723	MG
chr2:16333878-16334378	arhgef4	0.732021260238707	arhgef4::Body	4.70926	6.49424e-05	0.113409	MG	2.77376	0.0850081	0.0422463	MG
chr2:16338006-16338506	arhgef4	0.899534383202457	arhgef4::Body	1.58163	7.48191e-06	0.255812	MG	3.49502	0.0151398	0.0492493	MG
chr2:16342172-16342672	arhgef4	0.839478988073193	arhgef4::Body	1.56429	0.00394694	0.20386	MG	5.06132	5.31963e-07	0.161403	MG
chr2:16358760-16359260	arhgef4	0.808705768376645	arhgef4::TSS	1.917	0.000530393	0.195381	MG	2.36198	4.57686e-05	0.188489	MG
chr2:16564180-16564680	atp1b3a	0.920663382681683	atp1b3a::Body	2.78449	1.16394e-07	0.344857	MG	1.24828	0.00275119	0.165192	MG
chr2:16567931-16568431	atp1b3a	0.918469826019968	atp1b3a::Inter	4.75705	8.09854e-15	0.457508	MG	2.7005	0.0182048	0.100344	MG
chr2:18801438-18801938	glula	0.307937148231854	glula::Inter	0.793323	0.0640329	0.0940595	MG	1.86754	0.000362397	0.15519	MG
chr2:18802193-18802693	glula	0.574084843672186	glula::Inter	2.49328	0.00256277	0.0830674	MG	3.04344	0.00102648	0.114846	MG
chr2:18812393-18812893	glula	0.773459265559148	glula::Inter	1.94314	0.000336771	0.223615	MG	2.77472	7.14803e-05	0.154386	MG
chr2:18885568-18886068	glula	0.776579457639179	glula::Inter	3.61705	4.0942e-07	0.19389	MG	4.39579	9.28292e-17	0.441916	MG
chr2:18988081-18988581	glula	0.790327472646699	glula::TSS	1.44789	1.0195e-08	0.730072	MG	1.198	2.06274e-06	0.405104	MG
chr2:18988756-18989256	glula	0.57730720354116	glula::TSS	2.3016	0.00426473	0.106298	MG	1.1903	0.286902	0.0310891	MG
chr2:18989688-18990188	glula	0.714037516859392	glula::TSS	1.60631	0.169785	0.0466834	MG	1.91756	0.224293	0.0235172	MG
chr2:18990253-18990753	glula	0.780056199953968	glula::TSS	3.7805	1.7321e-07	0.270457	MG	2.15366	0.012923	0.0588612	MG
chr2:18991300-18991800	glula	0.729166257669542	glula::Body	2.86107	4.19262e-06	0.133742	MG	3.93876	0.05238	0.0551467	MG
chr2:18992441-18992941	glula	0.848565357713863	glula::Inter	5.59502	2.89828e-08	0.234361	MG	3.07251	0.114336	0.040732	MG
chr2:18993133-18993633	glula	0.850608835336	glula::Inter	3.02508	5.29102e-12	0.341973	MG	6.37505	1.13507e-08	0.164992	MG
chr2:19004220-19004720	glula	0.865387764328305	glula::Inter	4.17965	4.03991e-13	0.395109	MG	3.52504	1.56899e-05	0.135069	MG
chr2:19094412-19094912	glula	0.789436627454177	glula::Inter	1.71612	0.00123652	0.0631423	MG	2.73029	0.000274896	0.132132	MG
chr2:19132105-19132605	glula	0.770627349951097	glula::Inter	5.32664	0.000480108	0.0787344	MG	5.35267	0.000117877	0.0802045	MG
chr2:20925308-20925808	pla2g4aa	0.859509276095644	pla2g4aa::TSS	2.29551	4.29751e-05	0.146884	MG	1.70628	0.0529112	0.088331	MG
chr2:20925812-20926312	pla2g4aa	0.79770126855464	pla2g4aa::TSS	3.63188	0.000105035	0.138569	MG	1.15531	0.29932	0.0467476	MG
chr2:21474616-21475116	inhbab	0.80054787597706	inhbab::Inter	2.3455	0.00087269	0.160882	MG	3.36423	0.0524557	0.0336711	MG
chr2:21486336-21486836	inhbab	0.911127630656935	inhbab::TSS	3.92866	2.86693e-10	0.427716	MG	3.39041	2.58358e-05	0.109978	MG
chr2:21486939-21487439	inhbab	0.863853530302553	inhbab::TSS	1.85148	0.0079828	0.138374	MG	3.08106	0.0583433	0.0502089	MG
chr2:21488075-21488575	inhbab	0.775215690458116	inhbab::Body	2.0713	0.124938	0.0657924	MG	1.46682	0.170572	0.0303091	MG
chr2:21489065-21489565	inhbab	0.892179400351876	inhbab::Body	3.51457	7.24001e-12	0.320445	MG	4.11282	4.2562e-17	0.345034	MG
chr2:21499054-21499554	inhbab	0.63837725863752	inhbab::Body	3.86758	0.0377546	0.0591128	MG	3.58554	0.177299	0.0221425	MG
chr2:21501704-21502204	inhbab	0.702809896981543	inhbab::Body	1.85645	0.248519	0.0236137	MG	1.37121	0.288576	0.0223831	MG
chr2:21591797-21592297	inhbab	0.958658478183465	inhbab::Inter	5.45363	5.86195e-23	0.618134	MG	6.13257	6.7335e-14	0.334249	MG
chr2:21596728-21597228	inhbab	0.821896004911826	inhbab::Inter	3.7356	0.00210689	0.124158	MG	2.84661	0.114336	0.0331613	MG
chr2:21597458-21597958	inhbab	0.718959297088067	inhbab::Inter	3.86546	0.000398334	0.141938	MG	2.3217	0.286902	0.0251204	MG
chr2:21600217-21600717	inhbab	0.7366464738882	inhbab::Inter	2.5074	0.00045559	0.136358	MG	3.26264	0.0175672	0.107689	MG
chr2:21641465-21641965	inhbab	0.771942603992334	inhbab::Inter	1.63024	0.0524564	0.0931715	MG	4.39696	3.16135e-05	0.127171	MG
chr2:21765038-21765538	tox	0.781988559180327	tox::Inter	1.47254	0.000360384	0.278063	MG	0.731305	0.0853259	0.156657	MG
chr2:21805354-21805854	tox	0.814876240356805	tox::Inter	0.970191	0.0300628	0.362891	MG	0.489097	0.138608	0.314217	MG
chr2:21966484-21966984	tox	0.664834905133943	tox::Inter	1.85645	0.132565	0.0749083	MG	0.833901	0.241415	0.131393	MG
chr2:21983812-21984312	tox	0.901914558299454	tox::TSS	0.731017	0.0332665	0.152025	MG	0.467746	0.308219	0.127645	MG
chr2:21997638-21998138	tox	0.692113146637963	tox::Body	2.4542	0.00259929	0.0959869	MG	1.62004	1.34371e-06	0.333351	MG
chr2:22015394-22015894	tox	0.802743185752873	tox::Body	1.39457	0.00518689	0.105094	MG	1.3317	0.00614775	0.145379	MG
chr2:22016091-22016591	tox	0.661722967747732	tox::Body	3.07249	0.00156129	0.106004	MG	5.80136	1.11784e-05	0.110196	MG
chr2:22203832-22204332	tox	0.495687429045372	tox::Inter	3.75714	0.000593082	0.117732	MG	2.34835	0.000135114	0.163055	MG
chr2:23767091-23767591	xirp1	0.784517003719586	xirp1::Body	2.9226	0.0016464	0.117058	MG	3.86434	2.30222e-06	0.178269	MG
chr2:23768575-23769075	xirp1	0.888663747566366	xirp1::TSS	3.71186	6.51411e-06	0.164304	MG	6.41809	2.25524e-07	0.170049	MG
chr2:23783092-23783592	col15a1b	0.793452948112227	col15a1b::Inter;xirp1::Inter	3.21002	0.0617067	0.079426	MG	2.63806	0.167009	0.0455721	MG
chr2:23783092-23783592	xirp1	0.793452948112227	col15a1b::Inter;xirp1::Inter	3.21002	0.0617067	0.079426	MG	2.63806	0.167009	0.0455721	MG
chr2:23796292-23796792	col15a1b	0.782333326120487	col15a1b::Inter;xirp1::Inter	3.66446	0.0160546	0.0631048	MG	3.12175	0.318094	0.0155019	MG
chr2:23796292-23796792	xirp1	0.782333326120487	col15a1b::Inter;xirp1::Inter	3.66446	0.0160546	0.0631048	MG	3.12175	0.318094	0.0155019	MG
chr2:23986176-23986676	col15a1b	0.917262893272472	col15a1b::Body	3.67528	1.57093e-07	0.187382	MG	1.08086	0.153294	0.0386838	MG
chr2:23989423-23989923	col15a1b	0.840721081982388	col15a1b::Body	5.44404	0.00307617	0.0855796	MG	5.83209	0.000477623	0.112612	MG
chr2:23993511-23994011	col15a1b	0.916097009690864	col15a1b::Body	4.47813	7.58177e-06	0.155068	MG	2.24609	0.00251844	0.0999337	MG
chr2:24711007-24711507	pik3r2	0.848398662324037	pik3r2::Body	3.92523	9.73817e-08	0.327435	MG	1.99105	0.0182392	0.0755507	MG
chr2:25060159-25060659	ppp2r3a	0.583534110930887	ppp2r3a::Inter	3.85408	3.801e-05	0.185718	MG	3.34219	0.00646743	0.0525016	MG
chr2:25173302-25173802	fndc3ba	0.669197852708487	fndc3ba::Inter;ppp2r3a::Inter	1.05303	0.243656	0.0600436	MG	1.24794	0.0398891	0.0598891	MG
chr2:25173302-25173802	ppp2r3a	0.669197852708487	fndc3ba::Inter;ppp2r3a::Inter	1.05303	0.243656	0.0600436	MG	1.24794	0.0398891	0.0598891	MG
chr2:25173892-25174392	fndc3ba	0.618071368420789	fndc3ba::Inter;ppp2r3a::Inter	1.89738	0.217808	0.0348894	MG	1.3716	0.210193	0.0338084	MG
chr2:25173892-25174392	ppp2r3a	0.618071368420789	fndc3ba::Inter;ppp2r3a::Inter	1.89738	0.217808	0.0348894	MG	1.3716	0.210193	0.0338084	MG
chr2:25174689-25175189	fndc3ba	0.84525713053744	fndc3ba::Inter;ppp2r3a::Inter	1.52271	0.00325723	0.163777	MG	4.13248	2.21831e-07	0.267725	MG
chr2:25174689-25175189	ppp2r3a	0.84525713053744	fndc3ba::Inter;ppp2r3a::Inter	1.52271	0.00325723	0.163777	MG	4.13248	2.21831e-07	0.267725	MG
chr2:25185379-25185879	fndc3ba	0.914994889598893	fndc3ba::Inter;ppp2r3a::Inter	2.59694	4.29288e-09	0.381819	MG	6.80439	5.79892e-17	0.401042	MG
chr2:25185379-25185879	ppp2r3a	0.914994889598893	fndc3ba::Inter;ppp2r3a::Inter	2.59694	4.29288e-09	0.381819	MG	6.80439	5.79892e-17	0.401042	MG
chr2:25185889-25186389	fndc3ba	0.701345371434734	fndc3ba::Inter;ppp2r3a::Inter	1.88394	0.279546	0.0357694	MG	4.32584	0.00629728	0.0689858	MG
chr2:25185889-25186389	ppp2r3a	0.701345371434734	fndc3ba::Inter;ppp2r3a::Inter	1.88394	0.279546	0.0357694	MG	4.32584	0.00629728	0.0689858	MG
chr2:25277875-25278375	ppp2r3a	0.41583708782169	ppp2r3a::TSS	1.91948	0.0200514	0.103386	MG	3.51535	0.00495825	0.0876974	MG
chr2:25316113-25316613	fndc3ba	ND	fndc3ba::TSS	2.38023	0.0909577	0.0350915	MG	1.29606	0.190238	0.0318781	MG
chr2:25332923-25333423	fndc3ba	0.809592601907775	fndc3ba::Body	3.51489	6.87519e-06	0.175907	MG	2.36285	0.00013722	0.128911	MG
chr2:25333554-25334054	fndc3ba	0.727434242810175	fndc3ba::Body	1.49645	0.107371	0.06582	MG	2.16785	0.00457726	0.132407	MG
chr2:25512881-25513381	fndc3ba	0.567651142568827	fndc3ba::Body	1.42639	0.183283	0.0286323	MG	2.96355	0.161848	0.0389828	MG
chr2:2737276-2737776	aqp1a.1	0.940454901191466	aqp1a.1::TSS	5.79915	2.54914e-17	0.442288	MG	1.92577	0.0583433	0.0391843	MG
chr2:29220687-29221187	cdh18a	0.833430730253091	cdh18a::Inter	4.14549	2.16987e-06	0.187571	MG	2.61054	0.00860067	0.071449	MG
chr2:29249218-29249718	cdh18a	0.813794707310751	cdh18a::TSS	1.03908	0.0285434	0.137419	MG	1.0994	0.0141079	0.111351	MG
chr2:29281956-29282456	cdh18a	0.743661365842694	cdh18a::Body	4.07847	1.89831e-06	0.137802	MG	3.58057	0.0781377	0.056444	MG
chr2:29364075-29364575	cahz	0.783634614042914	cahz::Inter;cdh18a::Inter	3.31635	0.000495826	0.234113	MG	4.27942	1.82257e-10	0.228557	MG
chr2:29364075-29364575	cdh18a	0.783634614042914	cahz::Inter;cdh18a::Inter	3.31635	0.000495826	0.234113	MG	4.27942	1.82257e-10	0.228557	MG
chr2:29366484-29366984	cahz	0.641973485227263	cahz::Inter;cdh18a::Inter	2.81468	0.0276938	0.0497403	MG	4.19402	0.00167437	0.0997064	MG
chr2:29366484-29366984	cdh18a	0.641973485227263	cahz::Inter;cdh18a::Inter	2.81468	0.0276938	0.0497403	MG	4.19402	0.00167437	0.0997064	MG
chr2:29389974-29390474	cdh18a	0.616714146668997	cdh18a::Inter	1.30557	0.170555	0.0557052	MG	2.48231	0.167021	0.0426773	MG
chr2:29442433-29442933	cdh18a	0.82027973723237	cdh18a::Inter	2.62524	3.27245e-09	0.38958	MG	1.10362	0.00327684	0.130756	MG
chr2:29460804-29461304	cahz	0.414411728375698	cahz::Inter;cdh18a::Inter	0.880942	0.00544346	0.113393	MG	0.56723	0.0128944	0.107635	MG
chr2:29460804-29461304	cdh18a	0.414411728375698	cahz::Inter;cdh18a::Inter	0.880942	0.00544346	0.113393	MG	0.56723	0.0128944	0.107635	MG
chr2:29474920-29475420	cdh18a	0.858611963047712	cdh18a::Inter	3.56558	4.59742e-17	0.456049	MG	4.07501	2.75344e-11	0.259326	MG
chr2:29475446-29475946	cdh18a	0.691106298414161	cdh18a::Inter	2.82639	0.00797937	0.0528554	MG	1.75185	0.167616	0.0226826	MG
chr2:29483001-29483501	cahz	0.737429430077303	cahz::Body	5.25016	0.000766872	0.0745651	MG	2.90752	0.119273	0.0666328	MG
chr2:29605789-29606289	cahz	0.378111900527627	cahz::Inter	1.94432	0.131678	0.0501124	MG	2.63953	0.223521	0.0324687	MG
chr2:48127743-48128243	pfkpb	0.373555746418974	pfkpb::Body	1.75848	0.0345169	0.0828897	MG	0.343766	0.313243	0.0117845	MG
chr2:48150888-48151388	pfkpb	0.667175438614017	pfkpb::Body	4.53058	6.2282e-06	0.109478	MG	3.38739	0.000174927	0.0744471	MG
chr2:7893130-7893630	ephb3a	0.603904628466247	ephb3a::Inter	1.31551	0.170665	0.0619545	MG	1.47388	0.0032466	0.165634	MG
chr2:7900085-7900585	ephb3a	0.693383614720901	ephb3a::Inter	2.33409	8.02836e-06	0.200412	MG	4.77613	0.000663255	0.09756	MG
chr2:8017450-8017950	ephb3a	0.791865236634797	ephb3a::TSS	1.88891	0.00120162	0.137398	MG	0.370864	0.177299	0.0252866	MG
chr2:8153359-8153859	ephb3a	0.718005319031387	ephb3a::Inter	2.79977	0.000140058	0.124044	MG	4.5103	0.00969297	0.08485	MG
chr20:13646981-13647481	ENSDARG00000043475	0.790279189154752	ENSDARG00000043475::Inter	6.28694	7.52791e-09	0.155097	MG	4.15467	0.000269422	0.0841201	MG
chr20:13719717-13720217	si:ch211-122h15.4	0.93362521603316	si:ch211-122h15.4::Body	2.98295	5.08409e-07	0.273125	MG	2.41265	1.00456e-11	0.390532	MG
chr20:13722322-13722822	si:ch211-122h15.4	0.945234312871474	si:ch211-122h15.4::TSS	3.13865	4.08968e-13	0.528321	MG	3.07443	7.54983e-11	0.279533	MG
chr20:1572065-1572565	ptprk	0.595709554542215	ptprk::Inter	1.97764	0.000452494	0.206181	MG	1.55988	0.00038357	0.202576	MG
chr20:1675653-1676153	ptprk	0.915723222798932	ptprk::Inter	2.74277	1.9465e-10	0.49401	MG	2.72152	1.9114e-16	0.52074	MG
chr20:1676563-1677063	ptprk	0.898060083266658	ptprk::Inter	3.58766	2.11383e-08	0.288652	MG	4.17565	5.81386e-10	0.240388	MG
chr20:1699437-1699937	ptprk	0.858112553373918	ptprk::Inter	2.26788	1.05324e-06	0.23958	MG	2.14548	1.3901e-09	0.271245	MG
chr20:18136272-18136772	aqp4	0.661276831767067	aqp4::Inter	2.01323	0.0237745	0.110045	MG	1.9308	0.161848	0.020028	MG
chr20:18144707-18145207	aqp4	0.568330079057694	aqp4::Inter	1.01309	0.0400186	0.146036	MG	1.53528	0.000146539	0.156624	MG
chr20:18145233-18145733	aqp4	0.373488163747654	aqp4::Inter	1.56848	0.0781933	0.108836	MG	1.2414	0.0512063	0.0455015	MG
chr20:18163126-18163626	aqp4	0.803349992664453	aqp4::TSS	3.85612	0.0160833	0.075023	MG	2.52097	0.078751	0.0406145	MG
chr20:18163984-18164484	aqp4	0.806365342128991	aqp4::Body	1.88874	0.00111531	0.0667914	MG	2.45798	0.0583433	0.0498086	MG
chr20:18164974-18165474	aqp4	0.833906287113699	aqp4::Body	2.603	0.000708852	0.0660664	MG	5.83436	1.11784e-05	0.112793	MG
chr20:18406854-18407354	aqp4	0.907419702469188	aqp4::Inter	2.17953	0.000628658	0.208899	MG	4.38981	1.08807e-06	0.144292	MG
chr20:19421449-19421949	si:ch211-278j3.3	0.74549739534663	si:ch211-278j3.3::TSS	2.53162	4.63174e-07	0.22391	MG	2.14002	0.000585506	0.114384	MG
chr20:19421960-19422460	si:ch211-278j3.3	0.624678926130582	si:ch211-278j3.3::TSS	0.433401	0.0852632	0.137742	MG	0.85618	0.0583433	0.172741	MG
chr20:19434749-19435249	si:ch211-278j3.3	0.641018581967974	si:ch211-278j3.3::Inter	3.0227	0.00565122	0.100137	MG	3.23736	0.000222155	0.0776256	MG
chr20:19442941-19443441	si:ch211-278j3.3	0.458606510653719	si:ch211-278j3.3::Inter	3.58395	2.09148e-05	0.125492	MG	4.34272	6.30584e-08	0.197245	MG
chr20:23712632-23713132	sh3rf1	0.609406906593756	sh3rf1::Inter	1.96306	4.04067e-08	0.42026	MG	1.3352	2.02121e-06	0.283385	MG
chr20:23713967-23714467	sh3rf1	0.619884906060173	sh3rf1::Inter	1.30105	0.0734993	0.134156	MG	2.24671	0.0278902	0.0711373	MG
chr20:25344180-25344680	cyp2ad3	0.709149819815695	cyp2ad3::Inter;cyp2v1::Inter	3.38896	0.00062941	0.137485	MG	4.23997	0.0260605	0.0360071	MG
chr20:25344180-25344680	cyp2v1	0.709149819815695	cyp2ad3::Inter;cyp2v1::Inter	3.38896	0.00062941	0.137485	MG	4.23997	0.0260605	0.0360071	MG
chr20:25513396-25513896	cyp2v1	0.642688824347256	cyp2v1::Inter	2.07395	0.171148	0.0600135	MG	3.48852	0.0843041	0.0492254	MG
chr20:25532771-25533271	cyp2v1	0.617988674006157	cyp2v1::TSS	1.70507	0.00978353	0.151827	MG	1.72514	0.0041943	0.0704714	MG
chr20:25533555-25534055	cyp2v1	0.69067144039793	cyp2v1::TSS	1.5394	0.0897183	0.0447507	MG	3.8583	9.20377e-10	0.223183	MG
chr20:25534342-25534842	cyp2v1	ND	cyp2v1::TSS	2.91841	0.247469	0.0285203	MG	2.52562	0.0190578	0.063993	MG
chr20:25696591-25697091	cyp2ad3	0.622959210361344	cyp2ad3::Inter;cyp2v1::Inter	2.52166	0.0276218	0.0968103	MG	4.65449	0.017183	0.0486619	MG
chr20:25696591-25697091	cyp2v1	0.622959210361344	cyp2ad3::Inter;cyp2v1::Inter	2.52166	0.0276218	0.0968103	MG	4.65449	0.017183	0.0486619	MG
chr20:26405002-26405502	akap12b	0.710597620768521	akap12b::Inter	0.743414	0.058548	0.055085	MG	2.93592	0.00103677	0.104358	MG
chr20:26467111-26467611	akap12b	0.755625061522904	akap12b::TSS	0.710357	0.130431	0.0282514	MG	2.01558	0.0210593	0.0892678	MG
chr20:26467615-26468115	akap12b	ND	akap12b::TSS	2.5095	0.279546	0.00944516	MG	2.42696	0.223882	0.0292851	MG
chr20:26468600-26469100	akap12b	ND	akap12b::TSS	3.7726	0.0960388	0.0254865	MG	4.26513	9.03707e-07	0.138176	MG
chr20:28455712-28456212	sipa1l1	0.511886066795517	sipa1l1::Inter	2.79832	4.44819e-05	0.123297	MG	1.87344	0.00974269	0.0832524	MG
chr20:28573082-28573582	sipa1l1	0.539110982985816	sipa1l1::Inter	2.64631	0.00162283	0.114671	MG	2.73493	0.078543	0.024478	MG
chr20:28573763-28574263	sipa1l1	0.403599652592054	sipa1l1::Inter	3.87096	0.00662103	0.0605298	MG	2.99925	0.0851816	0.0624127	MG
chr20:28745313-28745813	sipa1l1	0.71943599540879	sipa1l1::Body	1.50135	0.180027	0.0351703	MG	2.59668	0.00029511	0.103936	MG
chr20:28766432-28766932	sipa1l1	0.757244747430695	sipa1l1::Body	2.22209	0.108639	0.0678856	MG	1.78861	0.0125846	0.0709015	MG
chr20:28767871-28768371	sipa1l1	0.807757080774353	sipa1l1::TSS	1.0937	0.0759308	0.227327	MG	1.04001	0.000189297	0.271616	MG
chr20:28780632-28781132	sipa1l1	0.451565537301818	sipa1l1::Inter	4.89161	0.000265271	0.0966191	MG	1.38162	0.318094	0.0401108	MG
chr20:32294841-32295341	nr2e1	0.617999669327416	nr2e1::Inter	2.728	0.180027	0.0813999	MG	2.39601	0.00586009	0.0944615	MG
chr20:32306840-32307340	nr2e1	0.398327703298267	nr2e1::Inter	1.57232	0.00237546	0.218151	MG	0.395655	0.211441	0.0854416	MG
chr20:32309874-32310374	nr2e1	0.599744583135658	nr2e1::Inter	1.36499	0.00216752	0.191617	MG	2.4782	1.87487e-09	0.29042	MG
chr20:32418339-32418839	nr2e1	0.491037004179036	nr2e1::Inter	1.62853	0.126353	0.0785602	MG	1.67431	0.0549335	0.0752037	MG
chr20:32418888-32419388	nr2e1	0.533751567542199	nr2e1::Inter	0.867128	0.0924119	0.134895	MG	1.62914	1.11851e-07	0.294939	MG
chr20:32443389-32443889	nr2e1	0.845960789560064	nr2e1::Body	1.1956	1.10123e-06	0.22809	MG	1.85258	5.21505e-09	0.343252	MG
chr20:32446274-32446774	nr2e1	0.823892772624565	nr2e1::TSS	1.60737	5.13841e-07	0.31899	MG	1.12196	0.00873619	0.168465	MG
chr20:32458480-32458980	nr2e1	0.872135405324245	nr2e1::Inter	1.64484	2.04773e-05	0.266217	MG	2.1487	1.35631e-10	0.417896	MG
chr20:32463064-32463564	nr2e1	0.623205595513724	nr2e1::Inter	3.24174	9.87497e-13	0.463975	MG	2.08214	9.73759e-05	0.169324	MG
chr20:34815631-34816131	emilin1a	0.804493914491959	emilin1a::Inter	3.66748	5.32576e-06	0.149085	MG	4.66627	3.10211e-05	0.139807	MG
chr20:34833947-34834447	emilin1a	0.696451335054731	emilin1a::Inter	1.30624	0.0939626	0.060941	MG	1.91794	0.000404709	0.144229	MG
chr20:34843001-34843501	emilin1a	0.795726732681574	emilin1a::Inter	2.52066	3.55563e-06	0.150736	MG	3.51667	0.114306	0.0340771	MG
chr20:34845406-34845906	emilin1a	0.842630177350205	emilin1a::TSS	1.87517	0.00578663	0.159205	MG	2.99107	3.27097e-09	0.279448	MG
chr20:34847559-34848059	emilin1a	0.667243247772577	emilin1a::Body	1.19162	0.0630002	0.0469635	MG	1.80506	0.11201	0.0501941	MG
chr20:36559572-36560072	enah	0.611222868161477	enah::TSS	1.07633	0.229866	0.198479	MG	0.59777	0.0193583	0.0967349	MG
chr20:36592322-36592822	enah	0.724137679446659	enah::Body	1.48266	0.0168822	0.142071	MG	1.47088	0.00860549	0.120536	MG
chr20:36604987-36605487	enah	0.741111370783038	enah::Body	1.77915	0.00237154	0.096984	MG	2.61355	2.58986e-09	0.305821	MG
chr20:40592215-40592715	cx43	0.954202612651593	cx43::Inter	6.95838	3.32624e-08	0.24821	MG	3.97448	0.00108731	0.0992671	MG
chr20:40594734-40595234	cx43	0.516627819851833	cx43::Inter	2.61843	0.00107863	0.158766	MG	1.79699	0.0413086	0.0649306	MG
chr20:40613976-40614476	cx43	0.747957838238308	cx43::Inter	3.35952	0.0104683	0.0628827	MG	2.44756	0.167376	0.0427241	MG
chr20:40720280-40720780	cx43	0.912129360694571	cx43::TSS	2.41166	8.75258e-06	0.186731	MG	2.31001	0.0181469	0.121804	MG
chr20:40845199-40845699	cx43	0.659395334442782	cx43::Inter	6.03433	0.000766872	0.129861	MG	4.75294	0.00400155	0.0765653	MG
chr20:43825523-43826023	mark3b	0.668432831865643	mark3b::Body	3.14513	0.000990504	0.12808	MG	2.39787	0.22082	0.0593811	MG
chr20:45073043-45073543	klhl29	0.527421589932976	klhl29::Inter	4.6754	0.0117654	0.0494017	MG	2.05502	0.114691	0.0352271	MG
chr20:45076267-45076767	klhl29	0.602644629500869	klhl29::Inter	3.40155	0.0960388	0.0192503	MG	2.49617	0.0838198	0.0729253	MG
chr20:5306409-5306909	ism2b	0.64717658822702	ism2b::Body	2.19	0.028824	0.0639095	MG	2.51836	0.0234753	0.0461934	MG
chr20:5310204-5310704	ism2b	0.914929314612591	ism2b::Body	4.17663	2.35176e-07	0.292621	MG	3.19539	7.11224e-08	0.215241	MG
chr20:5328810-5329310	ism2b	0.829486808307559	ism2b::TSS	2.13384	0.0912601	0.107874	MG	2.6866	0.000294518	0.124071	MG
chr20:6589910-6590410	tns3.2	0.364337254301211	tns3.2::TSS	2.39138	0.279546	0.0584544	MG	3.4277	0.0351883	0.0635974	MG
chr20:6630204-6630704	tns3.2	0.686895895362429	tns3.2::TSS	0.591776	0.202618	0.0561053	MG	0.765346	0.289891	0.0655076	MG
chr20:6678968-6679468	tns3.2	0.53354777838113	tns3.2::Inter	0.529051	0.133928	0.0447705	MG	2.92923	0.035136	0.0471172	MG
chr20:6682382-6682882	tns3.2	0.468643383224139	tns3.2::Inter	1.6594	0.0122585	0.0859557	MG	3.00796	0.00103677	0.103639	MG
chr20:8005201-8005701	plpp3	0.921046476550188	plpp3::Body	1.99831	6.6512e-10	0.394985	MG	2.70391	5.32433e-14	0.502835	MG
chr20:8005726-8006226	plpp3	0.660208502817381	plpp3::Body	1.57623	0.181117	0.0189099	MG	0.863519	0.286902	0.0217955	MG
chr20:8006822-8007322	plpp3	0.683943981614181	plpp3::Body	5.26113	0.00307617	0.0751495	MG	4.23412	0.00479286	0.0903312	MG
chr20:8010721-8011221	plpp3	0.834888309905479	plpp3::Body	2.49388	0.00157891	0.159486	MG	1.34056	0.00256442	0.163656	MG
chr20:8011627-8012127	plpp3	0.634884754502858	plpp3::Body	3.5952	0.0160833	0.0551693	MG	3.19027	0.00158879	0.107379	MG
chr20:8024223-8024723	plpp3	0.825144242324429	plpp3::TSS	1.4785	0.0118607	0.139744	MG	1.03092	0.0238241	0.145137	MG
chr20:9555320-9555820	zfp36l1b	0.864582823789408	zfp36l1b::Inter	2.6301	7.85275e-11	0.383741	MG	4.64154	7.09191e-20	0.465823	MG
chr20:9556826-9557326	zfp36l1b	0.938613885485413	zfp36l1b::Inter	3.96316	1.17534e-25	0.646837	MG	5.79551	6.25736e-27	0.566914	MG
chr20:9558089-9558589	zfp36l1b	0.667412442859015	zfp36l1b::Inter	1.09012	0.00532713	0.0853784	MG	4.58523	5.11518e-12	0.282645	MG
chr20:9577096-9577596	zfp36l1b	0.560154762437758	zfp36l1b::Body	3.16011	0.0283125	0.0652066	MG	2.06221	0.028431	0.0646866	MG
chr20:9577862-9578362	zfp36l1b	0.894843402160401	zfp36l1b::Body	3.06448	0.000297366	0.158311	MG	2.4296	0.028296	0.0847112	MG
chr20:9578458-9578958	zfp36l1b	0.743012924781574	zfp36l1b::Body	1.72795	0.0381778	0.0288737	MG	4.59019	0.0391242	0.0464528	MG
chr20:9579621-9580121	zfp36l1b	0.70203449344492	zfp36l1b::TSS	1.86223	0.00198797	0.135179	MG	1.60593	0.00359992	0.117204	MG
chr20:9580219-9580719	zfp36l1b	0.912173063556898	zfp36l1b::TSS	3.62624	1.83452e-13	0.403074	MG	2.87334	3.8359e-08	0.215356	MG
chr21:10683935-10684435	lman1	0.551267336925635	lman1::Inter	1.11953	0.183214	0.0953307	MG	0.937909	0.187939	0.0521851	MG
chr21:10684877-10685377	lman1	0.718430377475756	lman1::Inter	2.86537	7.43313e-05	0.214542	MG	2.90867	0.00150242	0.0927725	MG
chr21:10689024-10689524	lman1	0.617236081447017	lman1::Inter	2.39771	0.0916441	0.0559191	MG	2.22	0.0192909	0.0660196	MG
chr21:10689594-10690094	lman1	0.718506858187328	lman1::Inter	1.61306	6.69747e-09	0.4715	MG	2.86517	5.4128e-25	0.648845	MG
chr21:10690204-10690704	lman1	0.777837522929705	lman1::Inter	2.15607	0.0190063	0.0971965	MG	1.65513	9.77729e-05	0.115454	MG
chr21:11025211-11025711	nedd4l	0.599169588623931	nedd4l::Body	2.90358	0.00796151	0.0713367	MG	2.77608	0.0118909	0.0593236	MG
chr21:17786535-17787035	rxraa	0.633300898190254	rxraa::Body	2.13365	0.124386	0.0522866	MG	2.17605	0.286902	0.0323668	MG
chr21:17883309-17883809	rxraa	0.711325481657014	rxraa::Body	1.61344	0.00010208	0.207203	MG	1.82192	0.000757438	0.228611	MG
chr21:17919061-17919561	rxraa	0.745186092750555	rxraa::Body	1.42808	0.0159856	0.0905203	MG	0.988752	0.256734	0.0309823	MG
chr21:22401543-22402043	lmbrd2b	0.581984514148747	lmbrd2b::TSS	2.73362	5.10974e-05	0.136063	MG	2.2319	0.0358693	0.0731301	MG
chr21:24614791-24615291	arhgap32b	0.585793968530095	arhgap32b::Body	2.22147	0.0421261	0.062759	MG	1.05435	0.151996	0.0523678	MG
chr21:24632533-24633033	arhgap32b	0.589928282262422	arhgap32b::TSS	2.76194	0.000663959	0.155181	MG	2.93219	0.177867	0.0760761	MG
chr21:24643037-24643537	arhgap32b	0.721237429325912	arhgap32b::Inter	0.9969	0.179574	0.0826436	MG	0.644809	0.0244083	0.0571588	MG
chr21:24648027-24648527	arhgap32b	0.452889093466698	arhgap32b::Inter	1.51174	0.126803	0.0402514	MG	1.60557	0.0134325	0.101134	MG
chr21:24648545-24649045	arhgap32b	0.65442303291901	arhgap32b::Inter	2.67022	0.0159105	0.119233	MG	3.33286	1.1472e-10	0.309303	MG
chr21:27343942-27344442	zgc:165604	0.722542974285266	zgc:165604::Inter	1.56613	0.126353	0.0397377	MG	3.09273	0.114391	0.0410509	MG
chr21:27558119-27558619	zgc:165604	0.926038645970122	zgc:165604::TSS	5.29372	1.62135e-16	0.485915	MG	3.48015	1.7661e-16	0.345046	MG
chr21:27558900-27559400	zgc:165604	0.931468576735524	zgc:165604::TSS	3.74692	3.35552e-16	0.527844	MG	3.16333	3.77011e-13	0.390586	MG
chr21:27559506-27560006	zgc:165604	0.645875173617805	zgc:165604::Body	2.85584	0.00242661	0.0706259	MG	0.844871	0.318094	0.0168902	MG
chr21:27574653-27575153	zgc:165604	0.686571371441024	zgc:165604::Inter	2.59684	0.112357	0.0715832	MG	2.18703	0.0857417	0.0438605	MG
chr21:34632772-34633272	dacha	0.78286755817973	dacha::Body	2.41258	1.05727e-07	0.298685	MG	2.50017	1.10321e-11	0.261405	MG
chr21:34657505-34658005	dacha	0.430506979879795	dacha::Body	1.63911	0.135101	0.0877291	MG	1.3849	0.0197425	0.104416	MG
chr21:34658072-34658572	dacha	0.333936097346161	dacha::TSS	0.583042	0.1262	0.165371	MG	1.33034	5.46343e-07	0.384526	MG
chr21:37477081-37477581	amot	0.786350991015485	amot::TSS	2.23079	0.00521547	0.0843559	MG	2.90049	0.012563	0.0674244	MG
chr21:37477814-37478314	amot	0.764083260458447	amot::TSS	2.90422	0.000442528	0.147784	MG	2.92351	4.79327e-06	0.200517	MG
chr21:37478349-37478849	amot	0.629240255399876	amot::Body	0.955319	0.0278386	0.0939643	MG	2.40071	0.00852006	0.0575258	MG
chr21:37634835-37635335	amot	0.712312292329457	amot::Inter	3.01896	0.00340195	0.0822292	MG	2.00009	0.167376	0.0534016	MG
chr21:37637162-37637662	amot	0.74256487640894	amot::Inter	1.63823	0.0338643	0.109003	MG	2.71279	0.012563	0.0753018	MG
chr21:43801295-43801795	pdlim4	0.812132964112953	pdlim4::TSS	1.72328	0.00045848	0.210701	MG	2.83647	8.07484e-06	0.155706	MG
chr21:43818332-43818832	pdlim4	0.682675119645732	pdlim4::Inter	3.38465	0.000599203	0.113567	MG	1.65501	0.286902	0.0211452	MG
chr21:5635113-5635613	shroom3	0.909709018385729	shroom3::TSS	2.77858	3.05425e-07	0.396979	MG	1.67914	0.000179967	0.282821	MG
chr21:5635838-5636338	shroom3	0.805299025724793	shroom3::TSS	3.94979	1.50718e-05	0.133359	MG	1.72935	0.0131452	0.0584358	MG
chr21:5637996-5638496	shroom3	ND	shroom3::TSS	2.35693	0.129032	0.0462186	MG	1.5814	0.242658	0.0495438	MG
chr21:5659167-5659667	shroom3	0.776643132056071	shroom3::Body	1.07826	0.0790139	0.0894226	MG	3.64661	3.85383e-05	0.132802	MG
chr21:5753734-5754234	shroom3	0.899240185772858	shroom3::Body	1.68423	1.94169e-07	0.231181	MG	3.58416	2.5269e-14	0.380339	MG
chr21:5759393-5759893	shroom3	0.950148699977656	shroom3::Body	2.86715	4.4657e-16	0.561519	MG	6.01805	1.28994e-22	0.593594	MG
chr21:5761102-5761602	shroom3	0.603909060746867	shroom3::Body	2.7592	0.247469	0.0340189	MG	1.42296	0.287824	0.0163516	MG
chr21:9489717-9490217	ptpn13	0.730289432108355	ptpn13::Body	3.16149	2.30094e-07	0.20209	MG	3.36623	0.00034301	0.095938	MG
chr21:9492737-9493237	ptpn13	0.653196022893325	ptpn13::Body	1.70919	0.0126346	0.0937204	MG	5.12831	0.0583433	0.0683627	MG
chr21:9533257-9533757	ptpn13	0.695531669508584	ptpn13::Body	1.03721	0.0259423	0.162844	MG	2.44446	1.46147e-13	0.51336	MG
chr21:9541647-9542147	ptpn13	0.651203508492814	ptpn13::Body	1.75915	0.0636434	0.065015	MG	3.33209	0.0229974	0.0392094	MG
chr21:9589230-9589730	ptpn13	0.670550626369398	ptpn13::Inter	4.4173	7.46026e-08	0.247627	MG	1.49812	0.0817715	0.0501215	MG
chr22:12980560-12981060	ahr2	0.608295617799392	ahr2::Inter	1.78534	0.000359076	0.164671	MG	1.86396	1.09635e-07	0.343067	MG
chr22:13038403-13038903	ahr2	0.312465473579925	ahr2::Inter	1.41265	0.222176	0.0844357	MG	1.57665	0.177299	0.0627805	MG
chr22:13164609-13165109	ahr2	0.522616018962607	ahr2::TSS	0.682127	0.217493	0.238211	MG	1.90092	4.73772e-06	0.28515	MG
chr22:13276064-13276564	ahr2	0.703768067199219	ahr2::Inter	2.06888	0.279546	0.060559	MG	3.55411	0.286902	0.0471944	MG
chr22:16039802-16040302	s1pr1	0.660986278615156	s1pr1::Body	0.930143	0.304701	0.0438138	MG	1.11865	0.158763	0.0491195	MG
chr22:16042020-16042520	s1pr1	0.883001025269311	s1pr1::TSS	2.22974	0.00428669	0.178697	MG	0.91504	0.204516	0.0809806	MG
chr22:16052821-16053321	s1pr1	0.477596384113524	s1pr1::Inter	2.22596	0.133124	0.0563198	MG	2.37777	0.0187892	0.0926761	MG
chr22:16072049-16072549	s1pr1	0.876848213210096	s1pr1::Inter	1.24834	0.00307617	0.166002	MG	1.67505	3.33329e-05	0.276373	MG
chr22:16621400-16621900	patj	0.654227623916341	patj::Body	2.13181	0.00157891	0.119773	MG	3.94416	0.0150979	0.0592677	MG
chr22:16810333-16810833	nfia	0.593422532900854	nfia::Inter	1.22741	0.000830004	0.381133	MG	1.27879	0.000119169	0.375001	MG
chr22:16842534-16843034	nfia	0.552071624216793	nfia::Body	3.5208	2.64095e-05	0.157465	MG	1.07365	0.337585	0.0258049	MG
chr22:16982511-16983011	nfia	0.645521539353272	nfia::Body;patj::Inter	2.1812	0.0285888	0.0982923	MG	2.16255	3.13783e-05	0.148901	MG
chr22:16982511-16983011	patj	0.645521539353272	nfia::Body;patj::Inter	2.1812	0.0285888	0.0982923	MG	2.16255	3.13783e-05	0.148901	MG
chr22:17019173-17019673	nfia	0.56310902231825	nfia::Body	1.46154	0.00069757	0.168568	MG	2.23384	0.00584421	0.0683195	MG
chr22:17041581-17042081	nfia	0.442891925791503	nfia::Body	1.22419	0.181831	0.155704	MG	1.84669	2.03601e-08	0.312757	MG
chr22:17050724-17051224	nfia	0.515600991903808	nfia::Body	0.557214	0.0392981	0.0366404	MG	1.64177	0.00280399	0.115255	MG
chr22:17051257-17051757	nfia	0.537351952529904	nfia::TSS	1.68834	3.85525e-07	0.261178	MG	2.51811	1.35266e-07	0.217478	MG
chr22:17067864-17068364	nfia	0.636205852757911	nfia::Inter	1.69367	0.0745381	0.0728172	MG	1.46331	0.000899905	0.147514	MG
chr22:17076417-17076917	nfia	0.412628919834791	nfia::Inter	1.53682	0.141938	0.0603982	MG	2.23791	0.22082	0.039949	MG
chr22:18247427-18247927	BX664610.1	0.461949670226251	BX664610.1::Inter	0.848817	0.123669	0.152356	MG	1.77584	1.48433e-05	0.258884	MG
chr22:18248348-18248848	BX664610.1	0.76655468130736	BX664610.1::Inter	2.12411	7.14897e-10	0.552721	MG	1.68969	1.33893e-10	0.416091	MG
chr22:18278549-18279049	BX664610.1	0.761040647851302	BX664610.1::Inter	0.862514	0.247469	0.17873	MG	0.78812	0.0244899	0.183393	MG
chr22:19637743-19638243	rgmd	0.713928844692636	rgmd::Inter	2.42198	0.00513368	0.185558	MG	5.12949	1.3802e-06	0.157859	MG
chr22:19640040-19640540	rgmd	0.806160584279354	rgmd::TSS	2.05848	0.00205633	0.14178	MG	1.41765	0.0816056	0.130915	MG
chr22:19742632-19743132	rgmd	0.667068566331902	rgmd::Inter	3.45251	9.67789e-08	0.220266	MG	6.45773	5.15979e-08	0.174842	MG
chr22:24389005-24389505	p3h2	0.834070211418725	p3h2::TSS	1.06138	0.0144852	0.150725	MG	2.0105	0.00226937	0.12159	MG
chr22:24464300-24464800	p3h2	0.831258871873402	p3h2::Body	3.27991	0.000405594	0.146869	MG	2.7323	0.286902	0.0210064	MG
chr22:32888906-32889406	dag1	0.705720432692889	dag1::Inter	2.49057	1.9355e-06	0.238825	MG	1.65907	0.0320818	0.065212	MG
chr22:32900894-32901394	dag1	0.652545997908822	dag1::Inter	2.22887	0.000819124	0.213028	MG	2.01024	3.10582e-05	0.210803	MG
chr22:32925089-32925589	dag1	0.486329631145068	dag1::Inter	3.68903	0.00132718	0.100305	MG	3.65345	0.0149889	0.0553142	MG
chr22:32997787-32998287	dag1	0.590538245910294	dag1::Inter	0.896275	0.15435	0.0339942	MG	3.71473	2.25451e-11	0.328722	MG
chr22:33131748-33132248	dag1	0.726331447903728	dag1::TSS	1.35295	0.00187113	0.207716	MG	0.783777	0.242658	0.165381	MG
chr22:37123298-37123798	sox2	0.641067379546716	sox2::Inter	1.23277	0.0675379	0.0581175	MG	2.07009	0.0194806	0.0592107	MG
chr22:37130364-37130864	sox2	0.811446341749394	sox2::Inter	1.06897	0.0313674	0.187226	MG	1.2291	0.00723672	0.189046	MG
chr22:37135522-37136022	sox2	0.716795491701642	sox2::Inter	0.455193	0.27031	0.0567297	MG	1.2029	0.0141036	0.147033	MG
chr22:37228073-37228573	sox2	0.596015953747364	sox2::Inter	1.28351	0.125482	0.0909294	MG	1.05761	0.0308037	0.104458	MG
chr22:37322579-37323079	sox2	0.898261487932502	sox2::Inter	2.09384	1.58326e-06	0.2877	MG	2.20222	6.04337e-07	0.234888	MG
chr22:37349821-37350321	sox2	0.751056956597915	sox2::TSS	1.49767	2.29114e-08	0.442307	MG	1.36276	5.05178e-07	0.35651	MG
chr22:37350851-37351351	sox2	0.545490049835275	sox2::TSS	1.87	0.00390159	0.0804306	MG	1.36235	0.0387704	0.0832746	MG
chr22:37367094-37367594	sox2	0.619097800076053	sox2::Inter	3.56571	6.57756e-06	0.227439	MG	2.56209	0.0852823	0.0739809	MG
chr22:37450648-37451148	sox2	0.859419814452027	sox2::Inter	2.14852	2.23835e-16	0.676886	MG	3.43156	7.5083e-26	0.690955	MG
chr22:37455535-37456035	sox2	0.716020676912693	sox2::Inter	1.40566	0.0204108	0.0890078	MG	1.86169	0.0301895	0.0917925	MG
chr22:37575250-37575750	sox2	0.409578555172414	sox2::Inter	2.41537	0.0896264	0.119861	MG	2.6715	4.31997e-05	0.179615	MG
chr22:38048882-38049382	wwtr1	0.749510435509235	wwtr1::TSS	2.93876	0.000111619	0.156316	MG	2.47535	1.52959e-05	0.151315	MG
chr22:38062690-38063190	wwtr1	0.750511712153187	wwtr1::Body	1.37074	0.0421261	0.0537333	MG	4.03883	4.49499e-08	0.196885	MG
chr22:38068500-38069000	wwtr1	0.779060230930939	wwtr1::Body	4.28632	3.53507e-07	0.215677	MG	3.27067	2.69693e-11	0.290707	MG
chr22:38074866-38075366	wwtr1	0.719986942147042	wwtr1::Body	1.22906	0.00111414	0.181007	MG	1.42137	0.161848	0.0583093	MG
chr22:38076849-38077349	wwtr1	0.782495220439429	wwtr1::Body	2.93785	0.202618	0.135014	MG	2.60844	0.00844484	0.0680923	MG
chr22:38426672-38427172	si:ch211-126j24.1	0.300471708886325	si:ch211-126j24.1::Inter	1.94616	0.133711	0.035181	MG	2.05247	0.0860205	0.038373	MG
chr22:38578624-38579124	si:ch211-126j24.1	0.871069676875658	si:ch211-126j24.1::Body	3.12061	2.9674e-10	0.350523	MG	3.31912	1.94401e-05	0.148627	MG
chr22:38595876-38596376	si:ch211-126j24.1	0.818713323426349	si:ch211-126j24.1::Body	3.09594	1.9232e-06	0.215334	MG	3.87657	1.75568e-09	0.259434	MG
chr23:10454022-10454522	tns2a	0.504716140132909	tns2a::Inter	4.7867	0.0158542	0.084456	MG	2.8866	0.000275911	0.154368	MG
chr23:10487413-10487913	tns2a	0.802086926794148	tns2a::Body	1.90316	5.11956e-05	0.263724	MG	2.20816	3.25902e-07	0.25565	MG
chr23:11057492-11057992	chl1a	0.633119804081651	chl1a::Inter	5.51663	0.0117654	0.0900994	MG	4.27483	0.00164739	0.0811442	MG
chr23:11305024-11305524	chl1a	0.625441429233649	chl1a::Body	3.40467	0.000345541	0.104049	MG	4.0812	0.00635447	0.0631352	MG
chr23:11328878-11329378	chl1a	0.700782405039844	chl1a::Body	4.35496	1.22497e-06	0.199041	MG	3.27115	0.000221387	0.108541	MG
chr23:1161483-1161983	utrn	0.686041265466261	utrn::Inter	2.40326	0.0629253	0.0389043	MG	3.42107	0.0783558	0.0602743	MG
chr23:1193887-1194387	utrn	0.721596243871101	utrn::Body	2.84141	0.0279667	0.0717465	MG	2.13165	0.286902	0.0236928	MG
chr23:14031211-14031711	adcy6a	0.501299964532585	adcy6a::Body	1.04648	0.247469	0.0257166	MG	2.72402	0.22082	0.0261977	MG
chr23:14031865-14032365	adcy6a	0.695651312827806	adcy6a::Body	3.62364	0.00173646	0.05644	MG	5.07272	0.0011973	0.0657027	MG
chr23:14032632-14033132	adcy6a	0.900362322225002	adcy6a::Body	2.07384	4.6474e-06	0.199444	MG	4.35378	2.35781e-15	0.438328	MG
chr23:14037831-14038331	adcy6a	0.757873332076111	adcy6a::Body	3.31024	0.00133878	0.122039	MG	6.04739	9.78355e-07	0.131061	MG
chr23:14046417-14046917	adcy6a	0.708811836889982	adcy6a::Body	1.92437	0.00932824	0.0644944	MG	3.82878	0.000522872	0.085244	MG
chr23:14072314-14072814	adcy6a	0.733264804476482	adcy6a::Inter	1.08829	0.0784318	0.110608	MG	1.319	0.00055824	0.115582	MG
chr23:14073144-14073644	adcy6a	0.740581984469153	adcy6a::Inter	0.879691	0.147841	0.0984294	MG	1.3352	0.0677248	0.133271	MG
chr23:14590439-14590939	si:rp71-79p20.2	0.663962479379173	si:rp71-79p20.2::TSS	0.482961	0.197568	0.192217	MG	0.54502	0.125737	0.166458	MG
chr23:14591579-14592079	si:rp71-79p20.2	0.602251823936676	si:rp71-79p20.2::TSS	1.00992	0.00303701	0.14246	MG	0.747653	0.177299	0.108829	MG
chr23:14657005-14657505	si:rp71-79p20.2	0.808367409401887	si:rp71-79p20.2::Body	1.89108	0.000252271	0.229479	MG	2.85019	4.32504e-05	0.108659	MG
chr23:20171509-20172009	lamb2l	0.856772210073073	lamb2l::Inter	3.85642	9.83961e-06	0.164016	MG	1.88186	0.00168979	0.069484	MG
chr23:20294185-20294685	lamb2l	0.842188532793416	lamb2l::Body	5.41651	5.4285e-07	0.217114	MG	2.4968	0.0264851	0.0950802	MG
chr23:20310666-20311166	lamb2l	0.759315362696844	lamb2l::Body	3.69436	5.29385e-05	0.0899843	MG	1.17545	0.217746	0.0473101	MG
chr23:20311178-20311678	lamb2l	0.927448024878772	lamb2l::Body	4.71456	8.74759e-10	0.248518	MG	1.86329	0.00011372	0.135833	MG
chr23:20323361-20323861	lamb2l	0.918879507972019	lamb2l::Body	4.93919	9.74532e-10	0.224864	MG	3.18075	1.79382e-05	0.14152	MG
chr23:20327749-20328249	lamb2l	0.57678117510598	lamb2l::Inter	4.35475	0.0373951	0.0948399	MG	3.1114	0.0391242	0.0513938	MG
chr23:20328558-20329058	lamb2l	0.635027854462552	lamb2l::Inter	2.57682	0.0310258	0.13219	MG	2.96964	5.84467e-06	0.201509	MG
chr23:20338312-20338812	lamb2l	0.768407073592134	lamb2l::Inter	1.87885	0.0580742	0.0584638	MG	2.18582	0.187539	0.0569679	MG
chr23:20339398-20339898	lamb2l	0.797757396767249	lamb2l::Inter	2.19274	0.0261287	0.0969021	MG	2.73235	5.07256e-06	0.124087	MG
chr23:20348753-20349253	lamb2l	0.892638392779427	lamb2l::Inter	1.8295	0.000212057	0.145681	MG	2.13199	7.82096e-05	0.134531	MG
chr23:20353606-20354106	lamb2l	0.737215687657384	lamb2l::Inter	1.5508	0.000735073	0.0839259	MG	1.75839	0.0927698	0.0886617	MG
chr23:20354849-20355349	lamb2l	0.341028172802113	lamb2l::Inter	1.11262	0.193741	0.0770855	MG	1.31571	0.0391242	0.114763	MG
chr23:22200150-22200650	slc2a1a	0.758739394163061	slc2a1a::TSS	2.49808	4.57283e-05	0.337282	MG	1.81296	0.0219026	0.0782901	MG
chr23:24622453-24622953	nckap5l	0.46799505409459	nckap5l::Body	4.91504	6.18642e-06	0.187775	MG	1.59214	0.214738	0.031863	MG
chr23:24624394-24624894	nckap5l	0.419222166453869	nckap5l::Body	2.18039	0.000207808	0.170994	MG	3.12239	2.994e-06	0.188078	MG
chr23:25154376-25154876	fmnl3	0.622553301780173	fmnl3::Inter	0.296175	0.274188	0.0155282	MG	2.43333	0.00866203	0.0766889	MG
chr23:25160137-25160637	fmnl3	0.783470979877081	fmnl3::Inter	1.42648	2.60474e-06	0.407144	MG	1.50335	1.35919e-13	0.464619	MG
chr23:25354666-25355166	fmnl3	0.780756022379077	fmnl3::TSS	1.51461	0.00595738	0.107095	MG	1.7946	0.00646117	0.144014	MG
chr23:25383621-25384121	fmnl3	0.840334965054913	fmnl3::Body	1.59701	0.244795	0.0316727	MG	4.49405	0.0391242	0.0433285	MG
chr23:25501106-25501606	lrp1ab	0.674946936966841	lrp1ab::Body	2.61632	0.01903	0.0984285	MG	2.91305	0.00653891	0.051123	MG
chr23:25509194-25509694	lrp1ab	0.708867987355048	lrp1ab::Body	1.89048	0.0347179	0.117111	MG	2.98797	0.000167073	0.103598	MG
chr23:25542278-25542778	lrp1ab	0.718159784306746	lrp1ab::Body	2.47573	0.000356621	0.234616	MG	2.98211	0.0391242	0.0659757	MG
chr23:25906468-25906968	pkig	0.688048244457804	pkig::Body	1.70338	0.240266	0.0749024	MG	1.97218	0.167803	0.025547	MG
chr23:26035791-26036291	MAGI3	0.467781653715631	MAGI3::Inter;pkig::Inter	3.96626	9.29931e-06	0.178302	MG	3.11271	0.242658	0.0153925	MG
chr23:26035791-26036291	pkig	0.467781653715631	MAGI3::Inter;pkig::Inter	3.96626	9.29931e-06	0.178302	MG	3.11271	0.242658	0.0153925	MG
chr23:26254931-26255431	MAGI3	0.305020290985834	MAGI3::Body	3.62696	0.00210689	0.127243	MG	3.41602	0.242658	0.0194647	MG
chr23:26278877-26279377	MAGI3	0.41543513399355	MAGI3::Body	3.77892	0.000383997	0.149593	MG	6.68282	6.79945e-09	0.204704	MG
chr23:26279664-26280164	MAGI3	0.371112494832352	MAGI3::Body	3.58051	6.8111e-07	0.18398	MG	3.99232	3.24614e-05	0.113856	MG
chr23:26371444-26371944	MAGI3	0.356766770844754	MAGI3::Body	3.49186	0.247469	0.0708601	MG	4.5494	0.00401361	0.0841664	MG
chr23:26489185-26489685	MAGI3	0.857784017753349	MAGI3::TSS	0.937467	0.0286619	0.19804	MG	1.18594	0.000671531	0.21187	MG
chr23:26666514-26667014	hspg2	0.913164744900926	hspg2::Body	3.73385	6.38771e-07	0.197777	MG	4.27631	7.06857e-07	0.146455	MG
chr23:26714845-26715345	hspg2	0.764508398989394	hspg2::Body	4.20811	0.00422728	0.0714478	MG	4.14247	0.125737	0.0335224	MG
chr23:26725331-26725831	hspg2	0.847723436393964	hspg2::TSS	2.064	4.39348e-07	0.466518	MG	2.23266	8.38297e-07	0.324649	MG
chr23:26728164-26728664	hspg2	0.821973004299691	hspg2::Inter	1.44815	0.0857668	0.0668207	MG	2.29827	0.22082	0.0255327	MG
chr23:26862781-26863281	adcy6b	0.864007706020204	adcy6b::Body	2.91223	8.00959e-05	0.199572	MG	4.84243	0.00723672	0.0557126	MG
chr23:26863911-26864411	adcy6b	0.683020367509722	adcy6b::Body	1.28052	0.243713	0.0508619	MG	3.99995	1.1915e-06	0.161667	MG
chr23:26887955-26888455	adcy6b	0.777470723777317	adcy6b::TSS	0.536052	0.265409	0.0689639	MG	1.33301	0.155925	0.0837099	MG
chr23:27038763-27039263	adcy6b	0.517463052741339	adcy6b::Inter	0.861079	0.168683	0.0527454	MG	0.547997	0.318094	0.0269025	MG
chr23:27431066-27431566	dip2ba	0.623870074328314	dip2ba::Body	1.68018	0.284985	0.0574452	MG	1.32716	0.12074	0.0359609	MG
chr23:29462587-29463087	clstn1	0.401809938233783	clstn1::Inter	1.81183	1.34728e-08	0.328958	MG	3.49988	1.08562e-13	0.348081	MG
chr23:29476805-29477305	clstn1	0.581114975015179	clstn1::Inter	1.85011	1.63425e-08	0.324935	MG	1.34816	6.27038e-06	0.305177	MG
chr23:31852692-31853192	cd63	0.775496583765994	cd63::Inter	2.27048	1.19612e-07	0.346189	MG	1.27644	3.00234e-05	0.211706	MG
chr23:31868884-31869384	cd63	0.819899064629102	cd63::Inter	0.916945	0.281397	0.091209	MG	3.37171	7.65488e-07	0.248604	MG
chr23:35833313-35833813	rarga	0.780364672619609	rarga::Inter	2.40408	0.00587149	0.0643737	MG	1.74226	0.0347	0.0885972	MG
chr23:35865822-35866322	rarga	0.747503385531599	rarga::Body	1.79192	0.115529	0.117105	MG	4.25088	7.01782e-07	0.138743	MG
chr23:35893074-35893574	rarga	0.609682886030759	rarga::Body	4.8588	4.7316e-06	0.210791	MG	5.92112	1.11784e-05	0.119909	MG
chr23:35918182-35918682	rarga	0.880407473374663	rarga::TSS	1.60203	5.79962e-11	0.546904	MG	1.16003	4.13902e-09	0.460791	MG
chr23:35918707-35919207	rarga	0.721310390547241	rarga::Body	0.963544	0.241879	0.0755784	MG	0.580868	0.177299	0.0552306	MG
chr23:35932894-35933394	rarga	0.780240663341084	rarga::Body	0.990171	0.243797	0.0317135	MG	2.17473	0.0860205	0.0535618	MG
chr23:5260293-5260793	CR936540.1	0.756018794012956	CR936540.1::Inter	5.78267	0.000188977	0.108752	MG	2.59578	0.0530669	0.0369931	MG
chr23:5330990-5331490	CR936540.1	0.610989215751381	CR936540.1::Inter	1.54999	0.00712934	0.120256	MG	1.42709	0.143624	0.0506055	MG
chr23:5333788-5334288	CR936540.1	0.83099618154987	CR936540.1::Inter	3.2752	2.81539e-08	0.252108	MG	3.96951	1.50558e-17	0.385054	MG
chr23:5341421-5341921	CR936540.1	0.773766896512013	CR936540.1::Inter	4.93692	6.42389e-05	0.113601	MG	6.24586	2.91908e-05	0.150686	MG
chr23:5356782-5357282	CR936540.1	0.798211483913593	CR936540.1::Inter	2.88843	0.0128604	0.0763106	MG	2.35849	0.114671	0.0309993	MG
chr23:5364646-5365146	CR936540.1	0.69152025827857	CR936540.1::Inter	1.98211	0.0100468	0.0945342	MG	3.61495	0.00131736	0.0815989	MG
chr23:5365220-5365720	CR936540.1	0.859330018424971	CR936540.1::Inter	2.53118	2.7769e-12	0.546483	MG	4.84308	1.05676e-11	0.292758	MG
chr23:5369853-5370353	CR936540.1	0.930332330167904	CR936540.1::Inter	5.4982	1.7699e-11	0.298171	MG	7.07182	1.14761e-12	0.26868	MG
chr23:5370362-5370862	CR936540.1	0.819981588958762	CR936540.1::Inter	3.52133	0.00832495	0.115101	MG	4.43701	0.00106378	0.103313	MG
chr23:5383222-5383722	CR936540.1	0.603815072291891	CR936540.1::Inter	2.59786	0.0130103	0.0908814	MG	3.21498	0.0583109	0.0651225	MG
chr23:5462123-5462623	CR936540.1	0.631561525942826	CR936540.1::Inter	1.58363	0.000260114	0.185732	MG	2.0488	0.242658	0.0624208	MG
chr23:6376185-6376685	bmp7b	0.873769026267868	bmp7b::Inter;BX323087.1::Inter	3.23817	1.96385e-07	0.207135	MG	3.1524	0.000424217	0.128064	MG
chr23:6376185-6376685	BX323087.1	0.873769026267868	bmp7b::Inter;BX323087.1::Inter	3.23817	1.96385e-07	0.207135	MG	3.1524	0.000424217	0.128064	MG
chr23:6396644-6397144	bmp7b	0.61916331056241	bmp7b::Inter	1.16444	0.202618	0.0379886	MG	2.78282	0.22082	0.0255305	MG
chr23:6521252-6521752	bmp7b	0.7516803379285	bmp7b::TSS	2.16926	0.155749	0.128532	MG	2.76213	0.000283436	0.131157	MG
chr23:6521847-6522347	bmp7b	0.79898533522726	bmp7b::TSS	1.60695	0.00424961	0.125587	MG	2.3853	4.25417e-06	0.197394	MG
chr23:6528721-6529221	BX323087.1	0.815154895364675	BX323087.1::Inter	3.05853	7.24003e-06	0.248063	MG	3.74366	5.19939e-17	0.468684	MG
chr23:6629243-6629743	bmp7b	0.605790547649173	bmp7b::Inter	1.17966	0.00332966	0.121225	MG	0.862467	0.107786	0.072416	MG
chr23:7434894-7435394	plagl2	0.470957478107517	plagl2::Inter	1.82628	0.00695157	0.141486	MG	3.12141	1.18171e-06	0.186545	MG
chr23:7650777-7651277	plagl2	0.855906947994206	plagl2::Body	1.40608	6.5196e-07	0.498541	MG	2.22359	6.52457e-18	0.685842	MG
chr23:7651296-7651796	plagl2	0.794915969223021	plagl2::Body	3.34272	2.91951e-07	0.156932	MG	2.62691	0.00223798	0.131834	MG
chr23:7674620-7675120	plagl2	0.836682378807769	plagl2::TSS	1.67098	0.0852703	0.141442	MG	1.09921	0.00277311	0.156316	MG
chr23:9313392-9313892	soga1	0.706396476188127	soga1::Inter	0.348779	0.283539	0.0214108	MG	3.28184	0.242658	0.0175573	MG
chr23:9359823-9360323	soga1	0.7057807986071	soga1::Inter	3.10605	8.5959e-07	0.247607	MG	4.99161	0.000659722	0.0920322	MG
chr23:9376785-9377285	soga1	0.783914892241023	soga1::Inter	1.73808	0.00021193	0.0982108	MG	3.30461	0.00205111	0.0664254	MG
chr23:9465318-9465818	soga1	0.810633610229262	soga1::Body	2.36308	1.47196e-06	0.217476	MG	6.31594	6.79945e-09	0.158288	MG
chr23:9491808-9492308	soga1	0.804260231644178	soga1::TSS	0.808686	0.0268475	0.102991	MG	2.02858	0.0126966	0.125525	MG
chr23:9632131-9632631	lama5	0.690353262438771	lama5::Body	2.64104	0.0086779	0.0722479	MG	2.72444	0.318094	0.0112858	MG
chr23:9767895-9768395	lama5	0.815044397322398	lama5::TSS	3.35608	0.000136891	0.0706188	MG	2.29968	0.00888791	0.0706122	MG
chr23:9768505-9769005	lama5	0.873636433767225	lama5::TSS	2.73929	5.73264e-06	0.203233	MG	1.41955	0.00417142	0.0942207	MG
chr24:13080118-13080618	rdh10a	0.686866850480544	rdh10a::Inter;SBSPON::Inter	2.455	0.0910692	0.0440831	MG	2.88533	0.114441	0.0390739	MG
chr24:13080118-13080618	SBSPON	0.686866850480544	rdh10a::Inter;SBSPON::Inter	2.455	0.0910692	0.0440831	MG	2.88533	0.114441	0.0390739	MG
[truncated: 9,220 more rows]

## Sheet: tab3
ID	Gene	Cor	injury::p_val	injury::avg_log2FC	injury::pct.1	injury::pct.2	injury::p_val_adj	injury::cluster	dev::p_val	dev::avg_log2FC	dev::pct.1	dev::pct.2	dev::p_val_adj	dev::cluster
[truncated: 126 more rows]

[truncated: 5 more sheets: tab4, tab5, tab6, tab7, tab8]
