# Supplementary material for: Common and divergent gene regulatory networks control injury-induced and developmental neurogenesis in zebrafish retina
Source: bioRxiv preprint, doi:10.1101/2023.08.08.552451, version 1 (2023-08-08)
Supplement: Table ST7 [file 552451_file22.xlsx]

## Sheet: list
Table ST7: Regulatory relationships among TFs selectively active in development vs. injury samples.
tab1: Motif gene correlation of all TF-Motif pairs
tab2: Injury MG enriched GRNs
tab3: Development MG enriched GRNs

## Sheet: tab1
ID	Gene	Gene_Motif_Cor	TAG
M10040	prdm1a	-0.711487	Injury
M10349	prdm1a	-0.711487	Injury
M07121	prdm1a	-0.70451	Injury
M07314	prdm1a	-0.697806	Injury
M09649	prdm1a	-0.690063	Injury
M03916	prdm1a	-0.682627	Injury
M04731	prdm1a	-0.663888	Injury
M07121	prdm1b	-0.653058	Injury
M09818	prdm1a	-0.651809	Injury
M01066	prdm1a	-0.645202	Injury
M03865	prdm1a	-0.640473	Injury
M03916	prdm1b	-0.622165	Injury
M09649	prdm1b	-0.617612	Injury
M04731	prdm1b	-0.607267	Injury
M09818	prdm1b	-0.582882	Injury
M03897_2.00	pax6b	-0.484502	Injury
M09282_2.00	rxrgb	-0.460271	Injury
M09324_2.00	rxrgb	-0.460271	Injury
M03897_2.00	pax6a	-0.446055	Injury
M09617_2.00	rxrgb	-0.429936	Injury
M05883_2.00	rxrgb	-0.42974	Injury
M05880_2.00	rxrgb	-0.425904	Injury
M06416_2.00	rxrgb	-0.409763	Injury
M10415_2.00	rbpjb	-0.4053	Injury
M08455_2.00	rbpjb	-0.39718	Injury
M08823_2.00	bach2b	-0.39439	Injury
M11091_2.00	rxrgb	-0.39155	Injury
M09393_2.00	tcf7l2	-0.388102	Injury
M04249_2.00	bach2b	-0.380982	Injury
M09020_2.00	rbpjb	-0.377538	Injury
M09975_2.00	bach2b	-0.368829	Injury
M05884_2.00	rxrgb	-0.365464	Injury
M04247_2.00	bach2b	-0.362945	Injury
M06413_2.00	rxrgb	-0.358726	Injury
M02706_2.00	rxrgb	-0.357401	Injury
M03928_2.00	rxrgb	-0.353283	Injury
M00738_2.00	rbpjb	-0.352355	Injury
M09484_2.00	bach2b	-0.352252	Injury
M08832_2.00	bach2b	-0.342345	Injury
M10183	bach2b	-0.342242	Injury
M08065_2.00	bach2b	-0.334307	Injury
M09768	bach2b	-0.333167	Injury
M09938_2.00	bach2b	-0.326678	Injury
M00490	bach2b	-0.322807	Injury
M08185_2.00	bach2b	-0.320876	Injury
M00735_2.00	rbpjb	-0.313604	Injury
M00737_2.00	rbpjb	-0.312875	Injury
M00739_2.00	rbpjb	-0.312812	Injury
M00742_2.00	rbpjb	-0.310055	Injury
M09407_2.00	tcf7l2	-0.30914	Injury
M00741_2.00	rbpjb	-0.306735	Injury
M00983	bach2b	-0.302861	Injury
M08787_2.00	bach2b	-0.302022	Injury
M09871	bach2b	-0.301941	Injury
M06208_2.00	trps1	-0.301888	Injury
M09021_2.00	rbpjb	-0.299947	Injury
M08105_2.00	rbpjb	-0.29975	Injury
M07296	bach2b	-0.297277	Injury
M09783	rbpjb	-0.292415	Injury
M09488_2.00	bach2b	-0.292305	Injury
M06828	znf516	-0.290982	Injury
M00740_2.00	rbpjb	-0.283014	Injury
M00736_2.00	rbpjb	-0.267182	Injury
M05692_2.00	prox1a	-0.266293	Injury
M09294_2.00	rxrgb	-0.265581	Injury
M06500_2.00	lhx4	-0.265485	Injury
M11090_2.00	rxrgb	-0.264385	Injury
M10601_2.00	trps1	-0.264058	Injury
M00344_2.00	pax6b	-0.260966	Injury
M00343_2.00	pax6b	-0.257548	Injury
M02986_2.00	erfl3	-0.256572	Injury
M08099_2.00	klf12b	-0.253558	Injury
M04655_2.00	scrt2	-0.2526	Injury
M05302_2.00	lhx2b	-0.25224	Injury
M04643_2.00	scrt2	-0.249864	Injury
M02929_2.00	scrt2	-0.247405	Injury
M09265_2.00	rxrgb	-0.244834	Injury
M09327_2.00	rxrgb	-0.244834	Injury
M09305_2.00	roraa	-0.244815	Injury
M00344_2.00	pax6a	-0.243474	Injury
M05303_2.00	lhx2b	-0.242937	Injury
M00257	rreb1b	-0.242602	Injury
M03841_2.00	lhx2b	-0.241086	Injury
M03875_2.00	lhx2b	-0.238612	Injury
M09849	ncoa2	-0.238062	Injury
M00335_2.00	pax6b	-0.236762	Injury
M08397_2.00	scrt2	-0.234382	Injury
M04656_2.00	scrt2	-0.233796	Injury
M08800_2.00	bach2b	-0.233467	Injury
M00343_2.00	pax6a	-0.231597	Injury
M09502_2.00	klf12b	-0.230971	Injury
M06139_2.00	scrt2	-0.228065	Injury
M05040_2.00	lhx4	-0.22735	Injury
M04094	prox1a	-0.227057	Injury
M08894_2.00	klf12b	-0.225971	Injury
M06140_2.00	scrt2	-0.225719	Injury
M03849_2.00	lhx2b	-0.225695	Injury
M08021_2.00	klf12b	-0.224294	Injury
M06086_2.00	scrt2	-0.22368	Injury
M03445_2.00	prox1a	-0.223185	Injury
M06171_2.00	klf12b	-0.222198	Injury
M00831_2.00	tbx4	-0.221734	Injury
M00833_2.00	tbx4	-0.221734	Injury
M01029_2.00	tbx4	-0.221734	Injury
M03552_2.00	tbx4	-0.221734	Injury
M03558_2.00	tbx4	-0.221734	Injury
M09649_2.00	tbx4	-0.221734	Injury
M04135	tbx4	-0.221734	Injury
M03435_2.00	roraa	-0.221275	Injury
M08243_2.00	klf12b	-0.220463	Injury
M05303	znf536	-0.219826	Injury
M03918	scrt2	-0.216992	Injury
M02925_2.00	scrt2	-0.215674	Injury
M06526_2.00	six3b	-0.215087	Injury
M00335_2.00	pax6a	-0.212817	Injury
M03673_2.00	scrt2	-0.212446	Injury
M03761_2.00	trps1	-0.211742	Injury
M05567_2.00	roraa	-0.211478	Injury
M06087_2.00	scrt2	-0.210546	Injury
M05631_2.00	roraa	-0.210172	Injury
M02986_2.00	erf	-0.208662	Injury
M04456_2.00	klf12b	-0.208339	Injury
M03763_2.00	trps1	-0.207744	Injury
M01229	gtf2ird1	-0.207668	Injury
M03874_2.00	lhx2b	-0.207203	Injury
M09613_2.00	roraa	-0.205432	Injury
M04410_2.00	klf12b	-0.205063	Injury
M06992	plagl2	-0.204737	Injury
M06215_2.00	rx1	-0.202814	Injury
M09516_2.00	klf12b	-0.202498	Injury
M08885	hey1	-0.201195	Injury
M09313_2.00	pparab	-0.200122	Injury
M06170_2.00	klf12b	-0.19915	Injury
M05647_2.00	roraa	-0.1981	Injury
M09564_2.00	lhx2b	-0.196044	Injury
M03424_2.00	roraa	-0.195826	Injury
M08293_2.00	klf12b	-0.195534	Injury
M03404_2.00	roraa	-0.19551	Injury
M04644_2.00	scrt2	-0.195485	Injury
M09282_2.00	pparab	-0.195099	Injury
M09324_2.00	pparab	-0.195099	Injury
M11191_2.00	raraa	-0.194654	Injury
M00257	rreb1a	-0.194236	Injury
M03776_2.00	lhx2b	-0.194164	Injury
M09393_2.00	tcf7l1b	-0.193595	Injury
M04455_2.00	klf12b	-0.1932	Injury
M03386_2.00	roraa	-0.193056	Injury
M02709_2.00	roraa	-0.191617	Injury
M06522_2.00	lhx4	-0.191147	Injury
M07990_2.00	rorb	-0.191131	Injury
M06229_2.00	lhx4	-0.190873	Injury
M04430_2.00	klf12b	-0.190225	Injury
M02705_2.00	rxrgb	-0.19015	Injury
M04091	pou6f2	-0.189974	Injury
M07992_2.00	rorb	-0.188692	Injury
M04778_2.00	erfl3	-0.188532	Injury
M05583_2.00	roraa	-0.188169	Injury
M03691_2.00	scrt2	-0.187712	Injury
M08158_2.00	rarga	-0.187702	Injury
M08152_2.00	rxrgb	-0.187299	Injury
M05221_2.00	lhx4	-0.187069	Injury
M09512_2.00	gli2a	-0.186578	Injury
M08298_2.00	klf12b	-0.186458	Injury
M05900_2.00	hmga1a	-0.186056	Injury
M09328_2.00	nr2e3	-0.186037	Injury
M00779_2.00	klf12b	-0.185681	Injury
M05799_2.00	tbx4	-0.185619	Injury
M06482_2.00	lhx4	-0.185085	Injury
M04134_2.00	hey1	-0.184093	Injury
M08158_2.00	rorb	-0.183983	Injury
M03850_2.00	six3b	-0.183705	Injury
M05359_2.00	lhx2b	-0.18286	Injury
M01657_2.00	arid5b	-0.18283	Injury
M01661_2.00	arid5b	-0.18283	Injury
M05751_2.00	sox11b	-0.182373	Injury
M02790_2.00	hey1	-0.182281	Injury
M05155_2.00	lhx4	-0.181845	Injury
M05266_2.00	lhx4	-0.181845	Injury
M05306_2.00	lhx4	-0.181845	Injury
M05309_2.00	lhx4	-0.181845	Injury
M04133_2.00	hey1	-0.181617	Injury
M07991_2.00	rorb	-0.1816	Injury
M09616_2.00	rarga	-0.181563	Injury
M05651_2.00	roraa	-0.181337	Injury
M05671_2.00	roraa	-0.180338	Injury
M04090_2.00	her6	-0.180327	Injury
M03128_2.00	lhx4	-0.18024	Injury
M03186_2.00	lhx4	-0.18024	Injury
M03879_2.00	lhx4	-0.18024	Injury
M03880_2.00	lhx4	-0.18024	Injury
M05259_2.00	lhx4	-0.180191	Injury
M05261_2.00	lhx4	-0.180191	Injury
M09275_2.00	rorb	-0.179913	Injury
M04995_2.00	lhx4	-0.179889	Injury
M05213_2.00	lhx4	-0.179889	Injury
M06826	znf516	-0.179645	Injury
M04432_2.00	klf12b	-0.179469	Injury
M04154_2.00	hey1	-0.17934	Injury
M02709_2.00	raraa	-0.179129	Injury
M05752_2.00	sox11b	-0.178492	Injury
M09321_2.00	esr2a	-0.178449	Injury
M09276_2.00	pparab	-0.178308	Injury
M09310_2.00	pparab	-0.178308	Injury
M09616_2.00	rorb	-0.178255	Injury
M05360_2.00	lhx2b	-0.17793	Injury
M08091_2.00	klf12b	-0.17764	Injury
M09617_2.00	pparab	-0.177371	Injury
M07062	rreb1b	-0.176309	Injury
M05880_2.00	pparab	-0.176236	Injury
M06244_2.00	pbx3b	-0.176176	Injury
M03203_2.00	lhx4	-0.176157	Injury
M04464_2.00	klf12b	-0.176064	Injury
M03704_2.00	klf12b	-0.175833	Injury
M08221_2.00	rorb	-0.174565	Injury
M09620_2.00	roraa	-0.174494	Injury
M06163_2.00	klf12b	-0.17408	Injury
M09305_2.00	rarab	-0.173845	Injury
M08156_2.00	roraa	-0.173819	Injury
M04420_2.00	klf12b	-0.173572	Injury
M09429_2.00	tbx4	-0.172396	Injury
M10714_2.00	lhx4	-0.172315	Injury
M05610_2.00	roraa	-0.172244	Injury
M03370_2.00	roraa	-0.171733	Injury
M05883_2.00	pparab	-0.170777	Injury
M02709_2.00	rarab	-0.170535	Injury
M05038_2.00	lhx4	-0.170511	Injury
M05143_2.00	lhx4	-0.170511	Injury
M05197_2.00	lhx4	-0.170511	Injury
M05200_2.00	lhx4	-0.170511	Injury
M05216_2.00	lhx4	-0.170511	Injury
M05264_2.00	lhx4	-0.170511	Injury
M05368_2.00	lhx4	-0.170511	Injury
M00555_2.00	lhx4	-0.170478	Injury
M02688_2.00	lhx4	-0.170478	Injury
M01822	klf6a	-0.170241	Injury
M02793_2.00	hey1	-0.169667	Injury
M04172	hey1	-0.169667	Injury
M09615_2.00	rorb	-0.169418	Injury
M05878_2.00	rarga	-0.16934	Injury
M06418_2.00	rarga	-0.16934	Injury
M06423_2.00	rarga	-0.16934	Injury
M06435_2.00	rarga	-0.16934	Injury
M02984_2.00	erfl3	-0.168717	Injury
M04463_2.00	klf12b	-0.168603	Injury
M06416_2.00	pparab	-0.16835	Injury
M05667_2.00	roraa	-0.167993	Injury
M09615_2.00	roraa	-0.167705	Injury
M09305_2.00	rxraa	-0.16769	Injury
M09305_2.00	raraa	-0.167512	Injury
M02922	tcf7l2	-0.16749	Injury
M03840_2.00	lhx4	-0.167352	Injury
M06523_2.00	lhx4	-0.167337	Injury
M05762_2.00	sox11b	-0.166257	Injury
M00518	rxraa	-0.166223	Injury
M05564_2.00	roraa	-0.166165	Injury
M05885_2.00	roraa	-0.166033	Injury
M05761_2.00	sox11b	-0.165931	Injury
M03418_2.00	roraa	-0.165887	Injury
M09194_2.00	lhx4	-0.165781	Injury
M03393_2.00	roraa	-0.165046	Injury
M09613_2.00	rarab	-0.164861	Injury
M11091_2.00	pparab	-0.16466	Injury
M05683_2.00	roraa	-0.164616	Injury
M03164_2.00	lhx4	-0.164507	Injury
M09187_2.00	lhx2b	-0.164465	Injury
M11192_2.00	raraa	-0.164453	Injury
M00308_2.00	lhx2b	-0.164119	Injury
M05645_2.00	roraa	-0.164101	Injury
M10336	pbx1a	-0.163955	Injury
M05567_2.00	rarab	-0.163886	Injury
M05617_2.00	roraa	-0.163268	Injury
M06171_2.00	klf12a	-0.162965	Injury
M09461_2.00	tcf12	-0.162706	Injury
M09561_2.00	pbx1a	-0.162365	Injury
M08868_2.00	klf12b	-0.162154	Injury
M03423_2.00	roraa	-0.161152	Injury
M05663_2.00	roraa	-0.161086	Injury
M04155_2.00	hey1	-0.160833	Injury
M08885	bhlhe40	-0.160788	Injury
M02400_2.00	raraa	-0.160297	Injury
M09294_2.00	pparab	-0.159916	Injury
M09320_2.00	rarga	-0.159827	Injury
M09320_2.00	rorb	-0.159802	Injury
M09329_2.00	roraa	-0.159789	Injury
M03834_2.00	lhx4	-0.159765	Injury
M05220_2.00	lhx4	-0.159765	Injury
M05265_2.00	lhx4	-0.159765	Injury
M05423	rreb1b	-0.159534	Injury
M05691_2.00	prox1a	-0.159515	Injury
M09615_2.00	rarga	-0.158572	Injury
M05629_2.00	roraa	-0.15827	Injury
M05647_2.00	rarab	-0.158014	Injury
M03190_2.00	lhx4	-0.15773	Injury
M05009_2.00	lhx4	-0.157643	Injury
M09616_2.00	nr2f5	-0.157409	Injury
M03432_2.00	roraa	-0.156581	Injury
M03435_2.00	rarab	-0.156502	Injury
M05612_2.00	roraa	-0.156441	Injury
M09502_2.00	klf12a	-0.156225	Injury
M09271_2.00	rarab	-0.155482	Injury
M09271_2.00	rarga	-0.155345	Injury
M09164_2.00	pbx1a	-0.155225	Injury
M10029	pbx1a	-0.155225	Injury
M09616_2.00	roraa	-0.155116	Injury
M06215_2.00	lhx2b	-0.154943	Injury
M04778_2.00	erf	-0.154925	Injury
M03369_2.00	roraa	-0.154803	Injury
M11192_2.00	roraa	-0.154699	Injury
M09282_2.00	ppardb	-0.154664	Injury
M09324_2.00	ppardb	-0.154664	Injury
M08158_2.00	roraa	-0.154523	Injury
M00820_2.00	rxrgb	-0.154322	Injury
M03263_2.00	isl1	-0.15422	Injury
M03267_2.00	isl1	-0.15422	Injury
M05366_2.00	isl1	-0.15422	Injury
M05367_2.00	isl1	-0.15422	Injury
M09616_2.00	rxraa	-0.154219	Injury
M04131_2.00	hey1	-0.15412	Injury
M02079	isl2a	-0.154078	Injury
M02706_2.00	pparab	-0.153377	Injury
M09313_2.00	ppardb	-0.153301	Injury
M00279_2.00	lhx4	-0.153258	Injury
M06252_2.00	meis1b	-0.15319	Injury
M06343_2.00	meis1b	-0.15319	Injury
M09271_2.00	rorb	-0.152875	Injury
M09613_2.00	rxraa	-0.152828	Injury
M01663_2.00	arid5b	-0.152741	Injury
M05878_2.00	rarab	-0.152662	Injury
M06418_2.00	rarab	-0.152662	Injury
M06423_2.00	rarab	-0.152662	Injury
M06435_2.00	rarab	-0.152662	Injury
M09320_2.00	roraa	-0.152604	Injury
M04420_2.00	klf12a	-0.152433	Injury
M10715_2.00	lhx4	-0.152124	Injury
M04132_2.00	hey1	-0.151976	Injury
M03387_2.00	roraa	-0.151933	Injury
M08871_2.00	klf12b	-0.151484	Injury
M09620_2.00	rorb	-0.151467	Injury
M06538_2.00	rx1	-0.151277	Injury
M03386_2.00	rarab	-0.151061	Injury
M08293_2.00	klf12a	-0.151026	Injury
M09678_2.00	lhx4	-0.150871	Injury
M02396_2.00	roraa	-0.150708	Injury
M02079	isl2b	-0.150707	Injury
M02709_2.00	thrab	-0.150641	Injury
M09613_2.00	raraa	-0.150359	Injury
M03411_2.00	roraa	-0.150295	Injury
M05612_2.00	rarab	-0.15024	Injury
M05672_2.00	roraa	-0.150142	Injury
M03424_2.00	rorb	-0.149692	Injury
M03375_2.00	roraa	-0.149315	Injury
M01210_2.00	cxxc5a	-0.149244	Injury
M05300_2.00	lhx2b	-0.149063	Injury
M09465_2.00	tcf12	-0.149028	Injury
M04776_2.00	erfl3	-0.148936	Injury
M03370_2.00	rarab	-0.148776	Injury
M08730_2.00	ascl1b	-0.148724	Injury
M05302_2.00	rx1	-0.148685	Injury
M05567_2.00	rxraa	-0.148579	Injury
M01722_2.00	hey1	-0.148544	Injury
M05878_2.00	roraa	-0.148458	Injury
M06418_2.00	roraa	-0.148458	Injury
M06423_2.00	roraa	-0.148458	Injury
M06435_2.00	roraa	-0.148458	Injury
M05469	sall1a	-0.148412	Injury
M06417_2.00	rorb	-0.148348	Injury
M03396_2.00	roraa	-0.148285	Injury
M05884_2.00	pparab	-0.148198	Injury
M09271_2.00	roraa	-0.147971	Injury
M03403_2.00	roraa	-0.147901	Injury
M09306_2.00	roraa	-0.147649	Injury
M08055_2.00	ascl1b	-0.147554	Injury
M09767	ascl1b	-0.14754	Injury
M09617_2.00	ppardb	-0.147458	Injury
M03928_2.00	pparab	-0.147424	Injury
M09464_2.00	ascl1b	-0.147201	Injury
M05802_2.00	tbx4	-0.146959	Injury
M03841_2.00	rx1	-0.146633	Injury
M08158_2.00	nr2f5	-0.146587	Injury
M05301_2.00	lhx2b	-0.146568	Injury
M08158_2.00	rxraa	-0.146501	Injury
M03263_2.00	isl2b	-0.146056	Injury
M03267_2.00	isl2b	-0.146056	Injury
M05366_2.00	isl2b	-0.146056	Injury
M05367_2.00	isl2b	-0.146056	Injury
M03381_2.00	rorb	-0.145977	Injury
M04738_2.00	erfl3	-0.145899	Injury
M03792_2.00	lhx4	-0.14582	Injury
M05680_2.00	rxrgb	-0.145749	Injury
M05612_2.00	rarga	-0.145672	Injury
M07461	klf6a	-0.145487	Injury
M04662	foxn4	-0.145465	Injury
M02709_2.00	rxraa	-0.145404	Injury
M03419_2.00	roraa	-0.145337	Injury
M08477	foxj2	-0.14525	Injury
M05880_2.00	ppardb	-0.145243	Injury
M09707	rxraa	-0.145196	Injury
M08018	rarab	-0.14462	Injury
M06413_2.00	pparab	-0.144555	Injury
M09407_2.00	tcf7l1b	-0.144509	Injury
M00414_2.00	lhx4	-0.144323	Injury
M08024	pou6f2	-0.144251	Injury
M05390_2.00	isl1	-0.144149	Injury
M05391_2.00	isl1	-0.144149	Injury
M09305_2.00	rorab	-0.144133	Injury
M09334_2.00	roraa	-0.144084	Injury
M02746_2.00	roraa	-0.143973	Injury
M00816_2.00	rarga	-0.143928	Injury
M08748_2.00	ascl1b	-0.143671	Injury
M03407_2.00	roraa	-0.143651	Injury
M05661_2.00	roraa	-0.143367	Injury
M03406_2.00	roraa	-0.143316	Injury
M03370_2.00	raraa	-0.14325	Injury
M05641_2.00	roraa	-0.143005	Injury
M05241_2.00	vsx1	-0.142932	Injury
M09296_2.00	esr2a	-0.142899	Injury
M05595_2.00	esr2a	-0.142803	Injury
M03201_2.00	lhx4	-0.142761	Injury
M09313_2.00	nr2f1b	-0.142685	Injury
M03396_2.00	rorb	-0.142536	Injury
M08236	erf	-0.142431	Injury
M03420_2.00	roraa	-0.142248	Injury
M05883_2.00	ppardb	-0.142068	Injury
M07485_2.00	rx1	-0.142067	Injury
M08572_2.00	rx1	-0.142067	Injury
M03926_2.00	raraa	-0.142012	Injury
M03404_2.00	rarab	-0.141503	Injury
M09282_2.00	nr2f1b	-0.14131	Injury
M09324_2.00	nr2f1b	-0.14131	Injury
M05268_2.00	lhx4	-0.141258	Injury
M11091_2.00	ppardb	-0.141193	Injury
M05390_2.00	isl2b	-0.140764	Injury
M05391_2.00	isl2b	-0.140764	Injury
M05609_2.00	roraa	-0.140708	Injury
M03406_2.00	rarab	-0.14056	Injury
M03378_2.00	raraa	-0.140151	Injury
M05224_2.00	lhx4	-0.140122	Injury
M03060_2.00	foxp4	-0.140111	Injury
M09672	zeb1b	-0.140094	Injury
M06416_2.00	ppardb	-0.140062	Injury
M08153_2.00	roraa	-0.140036	Injury
M03278_2.00	lhx2b	-0.140012	Injury
M04420_2.00	klf6a	-0.139966	Injury
M04152_2.00	hey1	-0.139669	Injury
M05665_2.00	roraa	-0.139557	Injury
M06085_2.00	scrt2	-0.139459	Injury
M09387_2.00	sox11b	-0.139211	Injury
M09403_2.00	sox11b	-0.139211	Injury
M09325_2.00	roraa	-0.139144	Injury
M06413_2.00	ppardb	-0.138748	Injury
M06412_2.00	rxrgb	-0.138652	Injury
M09617_2.00	nr2f1b	-0.138525	Injury
M05607_2.00	roraa	-0.138348	Injury
M03421_2.00	roraa	-0.138297	Injury
M09512_2.00	gli3	-0.138136	Injury
M05882_2.00	roraa	-0.138122	Injury
M08692	erf	-0.138087	Injury
M04761_2.00	erfl3	-0.137859	Injury
M05609_2.00	rarab	-0.137531	Injury
M09293_2.00	roraa	-0.137518	Injury
M03079_2.00	lhx2b	-0.137429	Injury
M09271_2.00	rxraa	-0.137423	Injury
M09008_2.00	klf12b	-0.137382	Injury
M09264_2.00	roraa	-0.137362	Injury
M05303_2.00	rx1	-0.137269	Injury
M04136_2.00	ascl1b	-0.136895	Injury
M03409_2.00	roraa	-0.136807	Injury
M09210_2.00	lhx2b	-0.136724	Injury
M03377_2.00	roraa	-0.136637	Injury
M02709_2.00	rarga	-0.13662	Injury
M09320_2.00	rxraa	-0.136554	Injury
M05328_2.00	lhx2b	-0.136549	Injury
M05615_2.00	roraa	-0.136522	Injury
M09615_2.00	rxraa	-0.1365	Injury
M05647_2.00	rxraa	-0.136445	Injury
M03199_2.00	lhx2b	-0.136053	Injury
M09566_2.00	rx1	-0.136001	Injury
M04296_2.00	creb3l3b	-0.135974	Injury
M02984_2.00	erf	-0.135928	Injury
M04410_2.00	klf12a	-0.135738	Injury
M05599_2.00	roraa	-0.135607	Injury
M07356	epas1b	-0.135577	Injury
M05241_2.00	lhx4	-0.135551	Injury
M09333_2.00	rorb	-0.135549	Injury
M03875_2.00	rx1	-0.135474	Injury
M05643_2.00	roraa	-0.135465	Injury
M05658_2.00	esr2a	-0.135287	Injury
M05885_2.00	rarab	-0.135238	Injury
M09291_2.00	raraa	-0.135084	Injury
M11193_2.00	roraa	-0.134996	Injury
M05567_2.00	rarga	-0.134976	Injury
M04765_2.00	erfl3	-0.134815	Injury
M04432_2.00	klf12a	-0.134715	Injury
M11191_2.00	roraa	-0.134703	Injury
M00368_2.00	raraa	-0.134674	Injury
M05656_2.00	esr2a	-0.134567	Injury
M05621_2.00	rxrgb	-0.134111	Injury
M05583_2.00	rarab	-0.134046	Injury
M05774_2.00	tcf7l1b	-0.133991	Injury
M00787_2.00	klf12b	-0.133961	Injury
M05590_2.00	rarga	-0.133929	Injury
M05631_2.00	rorab	-0.133674	Injury
M05678_2.00	rxrgb	-0.133447	Injury
M05883_2.00	nr2f1b	-0.133335	Injury
M05647_2.00	raraa	-0.133074	Injury
M00308_2.00	rx1	-0.133045	Injury
M03370_2.00	rxraa	-0.132984	Injury
M04771_2.00	erfl3	-0.132693	Injury
M08153_2.00	rarga	-0.132582	Injury
M03408_2.00	roraa	-0.132374	Injury
M03503_2.00	sox13	-0.132347	Injury
M05649_2.00	roraa	-0.131894	Injury
M03405_2.00	rarab	-0.131745	Injury
M05655_2.00	esr2a	-0.131674	Injury
M08153_2.00	rarab	-0.131579	Injury
M09160_2.00	lhx2b	-0.131468	Injury
M09201_2.00	lhx2b	-0.131468	Injury
M08378	meis1b	-0.131373	Injury
M02706_2.00	ppardb	-0.131287	Injury
M00779_2.00	klf12a	-0.131226	Injury
M05272_2.00	lhx4	-0.130958	Injury
M01024_2.00	gli2a	-0.130958	Injury
M03418_2.00	rorb	-0.130515	Injury
M03435_2.00	rxraa	-0.130247	Injury
M00811_2.00	rarab	-0.130219	Injury
M11192_2.00	rarab	-0.130205	Injury
M03928_2.00	ppardb	-0.130154	Injury
M05610_2.00	rarab	-0.13011	Injury
M05681_2.00	roraa	-0.130092	Injury
M08244	erf	-0.130073	Injury
M04153_2.00	hey1	-0.130001	Injury
M05880_2.00	nr2f1b	-0.129956	Injury
M03204_2.00	isl2b	-0.129933	Injury
M01297_2.00	raraa	-0.129746	Injury
M03435_2.00	rorab	-0.129707	Injury
M08156_2.00	rarab	-0.129673	Injury
M09322_2.00	rorb	-0.129636	Injury
M00199_2.00	sox13	-0.129524	Injury
M03378_2.00	roraa	-0.1295	Injury
M05581_2.00	roraa	-0.129401	Injury
M09180_2.00	vsx1	-0.128913	Injury
M03704_2.00	klf12a	-0.128773	Injury
M04400_2.00	klf12b	-0.128498	Injury
M10709_2.00	meis1b	-0.128349	Injury
M00419	meis1b	-0.128349	Injury
M03414_2.00	esr2a	-0.128271	Injury
M05647_2.00	rarga	-0.128262	Injury
M03855_2.00	lhx2b	-0.128208	Injury
M09578_2.00	isl2b	-0.12812	Injury
M00811_2.00	roraa	-0.128088	Injury
M11192_2.00	thrab	-0.128001	Injury
M03435_2.00	rarga	-0.127946	Injury
M09292_2.00	roraa	-0.127798	Injury
M05396	plagl2	-0.127743	Injury
M04646	foxn4	-0.127699	Injury
M06432_2.00	nr2e3	-0.127655	Injury
M02791_2.00	hey1	-0.127649	Injury
M03849_2.00	rx1	-0.127466	Injury
M09389_2.00	sox11b	-0.127364	Injury
M09399_2.00	sox11b	-0.127364	Injury
M05884_2.00	ppardb	-0.1273	Injury
M01103_2.00	hmga1a	-0.127084	Injury
M03174_2.00	lhx2b	-0.127077	Injury
M09272_2.00	esr2a	-0.126974	Injury
M03874_2.00	rx1	-0.126845	Injury
M01034	bhlhe40	-0.126839	Injury
M05774_2.00	tcf7l1a	-0.126679	Injury
M05674_2.00	esr2a	-0.126609	Injury
M05760_2.00	sox11b	-0.126468	Injury
M09613_2.00	rarga	-0.126421	Injury
M03424_2.00	rarab	-0.126286	Injury
M01726_2.00	her6	-0.126231	Injury
M04401_2.00	klf12b	-0.126187	Injury
M08018	raraa	-0.126167	Injury
M08222_2.00	roraa	-0.12605	Injury
M03026_2.00	FOXK2	-0.125736	Injury
M03054_2.00	FOXK2	-0.125736	Injury
M03062_2.00	FOXK2	-0.125736	Injury
M07062	rreb1a	-0.125651	Injury
M05610_2.00	raraa	-0.125561	Injury
M05671_2.00	rarab	-0.125559	Injury
M08299_2.00	klf12b	-0.125542	Injury
M04430_2.00	klf12a	-0.125508	Injury
M05598_2.00	raraa	-0.125496	Injury
M02424_2.00	roraa	-0.125477	Injury
M01982_2.00	foxp4	-0.125463	Injury
M05609_2.00	rarga	-0.125388	Injury
M09264_2.00	rorb	-0.12525	Injury
M00811_2.00	rarga	-0.125247	Injury
M03423_2.00	rarab	-0.125177	Injury
M09169_2.00	lhx4	-0.125104	Injury
M04135_2.00	ascl1b	-0.125059	Injury
M03410_2.00	roraa	-0.12491	Injury
M03934_2.00	roraa	-0.12484	Injury
M05676_2.00	esr2a	-0.124819	Injury
M03934	zbtb18	-0.124553	Injury
M02917_2.00	zbtb18	-0.124417	Injury
M06171_2.00	klf6a	-0.124406	Injury
M03415_2.00	roraa	-0.124234	Injury
M03268_2.00	lhx4	-0.124212	Injury
M04450	vsx1	-0.124121	Injury
M03871_2.00	lhx4	-0.124076	Injury
M03185_2.00	lhx4	-0.123909	Injury
M03256_2.00	lhx4	-0.123909	Injury
M05060_2.00	lhx4	-0.123909	Injury
M05225_2.00	lhx4	-0.123909	Injury
M05269_2.00	lhx4	-0.123909	Injury
M06538_2.00	lhx2b	-0.123792	Injury
M08868_2.00	klf12a	-0.123654	Injury
M01037	gli2a	-0.123619	Injury
M08871_2.00	klf12a	-0.123526	Injury
M09305_2.00	rarga	-0.123518	Injury
M00816_2.00	roraa	-0.123399	Injury
M03405_2.00	roraa	-0.12329	Injury
M03834_2.00	vsx1	-0.123219	Injury
M05220_2.00	vsx1	-0.123219	Injury
M05265_2.00	vsx1	-0.123219	Injury
M08134_2.00	pbx1a	-0.122787	Injury
M03386_2.00	rxraa	-0.122596	Injury
M05673_2.00	esr2a	-0.122555	Injury
M05759_2.00	sox11b	-0.122453	Injury
M03411_2.00	raraa	-0.122226	Injury
M11091_2.00	nr2f1b	-0.122139	Injury
M03388_2.00	roraa	-0.122106	Injury
M09566_2.00	vax2	-0.122093	Injury
M08868_2.00	klf6a	-0.121819	Injury
M03434_2.00	roraa	-0.121758	Injury
M07993_2.00	raraa	-0.121709	Injury
M02410_2.00	roraa	-0.121313	Injury
M03433_2.00	rorb	-0.121302	Injury
M00226_2.00	klf12b	-0.121288	Injury
M05299_2.00	lhx2b	-0.121056	Injury
M11090_2.00	pparab	-0.12095	Injury
M09578_2.00	isl1	-0.120922	Injury
M02396_2.00	rarab	-0.12091	Injury
M05774_2.00	tcf7l2	-0.120903	Injury
M02421_2.00	nr2e1	-0.120887	Injury
M03790_2.00	lhx4	-0.120757	Injury
M03204_2.00	isl1	-0.120746	Injury
M00413	zeb1b	-0.120656	Injury
M07842_2.00	zeb1b	-0.120567	Injury
M03404_2.00	raraa	-0.120561	Injury
M09329_2.00	rorb	-0.120538	Injury
M04298_2.00	creb3l3b	-0.120532	Injury
M10090_2.00	zeb1b	-0.120426	Injury
M06416_2.00	nr2f1b	-0.120422	Injury
M02399_2.00	rarab	-0.120419	Injury
M07461	klf15	-0.12041	Injury
M08894_2.00	klf6a	-0.120393	Injury
M05360_2.00	rx1	-0.12039	Injury
M04736_2.00	erfl3	-0.120266	Injury
M03380_2.00	roraa	-0.120186	Injury
M05359_2.00	rx1	-0.119982	Injury
M05327_2.00	lhx2b	-0.119961	Injury
M00185_2.00	rarga	-0.119927	Injury
M08461_2.00	rarga	-0.119927	Injury
M09615_2.00	nr2f5	-0.119915	Injury
M05758_2.00	tcf7l1b	-0.119852	Injury
M05879_2.00	roraa	-0.119815	Injury
M09322_2.00	roraa	-0.119803	Injury
M03193_2.00	vsx1	-0.11968	Injury
M05878_2.00	rxraa	-0.119633	Injury
M06418_2.00	rxraa	-0.119633	Injury
M06423_2.00	rxraa	-0.119633	Injury
M06435_2.00	rxraa	-0.119633	Injury
M08968	rxraa	-0.119633	Injury
M02498_2.00	tbx2a	-0.119604	Injury
M02416_2.00	rarab	-0.119562	Injury
M05801_2.00	tbx4	-0.119547	Injury
M03432_2.00	rorb	-0.119164	Injury
M04766_2.00	erfl3	-0.119061	Injury
M08243_2.00	klf6a	-0.119023	Injury
M03050_2.00	foxp4	-0.119003	Injury
M05157_2.00	lhx4	-0.118983	Injury
M05172_2.00	lhx4	-0.118983	Injury
M05175_2.00	lhx4	-0.118983	Injury
M05260_2.00	lhx4	-0.118983	Injury
M03367_2.00	esr2a	-0.118976	Injury
M08099_2.00	klf6a	-0.118969	Injury
M09748	rad21a	-0.118866	Injury
M10186_2.00	klf7b	-0.1188	Injury
M03411_2.00	rarab	-0.118739	Injury
M09564_2.00	rx1	-0.118713	Injury
M03404_2.00	rxraa	-0.118645	Injury
M03867_2.00	lhx2b	-0.118644	Injury
M05590_2.00	rarab	-0.118601	Injury
M08298_2.00	klf12a	-0.118509	Injury
M04697	rad21a	-0.118436	Injury
M03373_2.00	roraa	-0.118348	Injury
M03386_2.00	raraa	-0.118323	Injury
M02916_2.00	zbtb18	-0.118318	Injury
M08293_2.00	klf6a	-0.118292	Injury
M00830_2.00	tbx4	-0.11829	Injury
M05612_2.00	raraa	-0.118261	Injury
M09320_2.00	nr2f5	-0.118258	Injury
M03853_2.00	lhx4	-0.118052	Injury
M05410_2.00	lhx4	-0.118052	Injury
M05631_2.00	rxraa	-0.117981	Injury
M02416_2.00	rarga	-0.117933	Injury
M03406_2.00	rarga	-0.11791	Injury
M00393_2.00	vsx1	-0.117905	Injury
M05593_2.00	rarga	-0.117844	Injury
M06430_2.00	roraa	-0.117833	Injury
M05671_2.00	rorab	-0.117811	Injury
M03852_2.00	lhx2b	-0.117714	Injury
M03814_2.00	lhx4	-0.117561	Injury
M03776_2.00	rx1	-0.117325	Injury
M05583_2.00	rarga	-0.117012	Injury
M09276_2.00	nr2f1b	-0.116828	Injury
M09310_2.00	nr2f1b	-0.116828	Injury
M05609_2.00	raraa	-0.116591	Injury
M05613_2.00	rorb	-0.116552	Injury
M06264_2.00	vsx1	-0.116403	Injury
M05599_2.00	rarab	-0.116317	Injury
M03926_2.00	roraa	-0.116248	Injury
M05643_2.00	rarab	-0.116211	Injury
M02021	rxraa	-0.11615	Injury
M00750_2.00	hmga1a	-0.116144	Injury
M01517_2.00	hmga1a	-0.116144	Injury
M11191_2.00	thrab	-0.116097	Injury
M02734_2.00	erfl3	-0.116078	Injury
M08870	bhlhe40	-0.116056	Injury
M04585_2.00	zbtb18	-0.115915	Injury
M05596_2.00	esr2a	-0.115831	Injury
M05645_2.00	rarab	-0.115815	Injury
M09613_2.00	rorab	-0.115764	Injury
M00199_2.00	sox2	-0.115629	Injury
M01684_2.00	hmga1a	-0.115609	Injury
M05651_2.00	rorab	-0.115505	Injury
M09265_2.00	pparab	-0.115283	Injury
M09327_2.00	pparab	-0.115283	Injury
M09571_2.00	vax2	-0.115223	Injury
M02746_2.00	rorab	-0.115159	Injury
M09280_2.00	roraa	-0.115066	Injury
M05598_2.00	roraa	-0.114932	Injury
M06163_2.00	klf12a	-0.114906	Injury
M04091_2.00	her6	-0.114837	Injury
M03190_2.00	vsx1	-0.114819	Injury
M04586_2.00	zbtb18	-0.114726	Injury
M08021_2.00	klf6a	-0.114692	Injury
M09008_2.00	klf6a	-0.114552	Injury
M05612_2.00	rxraa	-0.11453	Injury
M05011_2.00	lhx2b	-0.114505	Injury
M09294_2.00	ppardb	-0.114232	Injury
M02124_2.00	six3b	-0.114078	Injury
M03372_2.00	roraa	-0.113893	Injury
M07985_2.00	rarga	-0.113845	Injury
M04775_2.00	erfl3	-0.113779	Injury
M05610_2.00	rxraa	-0.113772	Injury
M05583_2.00	rxraa	-0.113724	Injury
M05758_2.00	tcf7l1a	-0.113675	Injury
M03375_2.00	rorab	-0.113624	Injury
M05010_2.00	lhx2b	-0.113591	Injury
M02495_2.00	tbx4	-0.113428	Injury
M09325_2.00	rarab	-0.113134	Injury
M11140_2.00	roraa	-0.113125	Injury
M09133_2.00	vax2	-0.113097	Injury
M09196_2.00	vax2	-0.113097	Injury
M05885_2.00	rxraa	-0.113063	Injury
M05238_2.00	lhx4	-0.113022	Injury
M09205_2.00	pbx1a	-0.11297	Injury
M05683_2.00	rarab	-0.112895	Injury
M00185_2.00	rarab	-0.11271	Injury
M05752_2.00	sox12	-0.11265	Injury
M03355_2.00	roraa	-0.112548	Injury
M09286_2.00	roraa	-0.112483	Injury
M09323_2.00	roraa	-0.112483	Injury
M05323_2.00	vsx1	-0.112472	Injury
M03533_2.00	sox11b	-0.112393	Injury
M03424_2.00	rarga	-0.112237	Injury
M03840_2.00	vsx1	-0.112212	Injury
M05644_2.00	roraa	-0.112044	Injury
M05667_2.00	rarab	-0.111963	Injury
M11191_2.00	rarab	-0.111956	Injury
M01650	nr2e3	-0.111917	Injury
M03386_2.00	rarga	-0.111898	Injury
M00812_2.00	roraa	-0.111815	Injury
M05246_2.00	meis1b	-0.111804	Injury
M03378_2.00	rarab	-0.111774	Injury
M03060_2.00	FOXK2	-0.111766	Injury
M06967	plagl2	-0.111665	Injury
M05598_2.00	rarab	-0.11157	Injury
M05629_2.00	rorab	-0.111558	Injury
M03433_2.00	roraa	-0.111507	Injury
M04776_2.00	erf	-0.111385	Injury
M05589_2.00	roraa	-0.111322	Injury
M03798_2.00	vsx1	-0.111196	Injury
M07292	glis1b	-0.111182	Injury
M09312_2.00	esr2a	-0.11111	Injury
M04419_2.00	klf12b	-0.111052	Injury
M05630_2.00	roraa	-0.111012	Injury
M03076_2.00	lhx2b	-0.110958	Injury
M03431_2.00	esr2a	-0.110946	Injury
M07291	gli2a	-0.110934	Injury
M05675_2.00	esr2a	-0.110747	Injury
M04849_2.00	foxo1a	-0.110651	Injury
M08976_2.00	gli3	-0.110625	Injury
M05672_2.00	rorab	-0.110504	Injury
M09271_2.00	nr2f5	-0.110443	Injury
M03516_2.00	sox11b	-0.110351	Injury
M05647_2.00	thrab	-0.11035	Injury
M00831_2.00	tbx2b	-0.110256	Injury
M00833_2.00	tbx2b	-0.110256	Injury
M01029_2.00	tbx2b	-0.110256	Injury
M03552_2.00	tbx2b	-0.110256	Injury
M03558_2.00	tbx2b	-0.110256	Injury
M09649_2.00	tbx2b	-0.110256	Injury
M09525_2.00	tfdp2	-0.110052	Injury
M03872_2.00	lhx4	-0.109771	Injury
M07993_2.00	roraa	-0.109653	Injury
M01010_2.00	foxn4	-0.109626	Injury
M03416_2.00	roraa	-0.109456	Injury
M03423_2.00	raraa	-0.109398	Injury
M05648_2.00	roraa	-0.109343	Injury
M03503_2.00	sox8a	-0.10932	Injury
M00309_2.00	lhx4	-0.109308	Injury
M05640_2.00	rarga	-0.109278	Injury
M05617_2.00	rarab	-0.109152	Injury
M04456_2.00	klf6a	-0.109113	Injury
M03503_2.00	sox2	-0.109058	Injury
M04761_2.00	erf	-0.108907	Injury
M02399_2.00	roraa	-0.10885	Injury
M10676_2.00	vsx1	-0.108834	Injury
M09291_2.00	thrab	-0.108764	Injury
M05654_2.00	roraa	-0.108711	Injury
M05219_2.00	lhx4	-0.108632	Injury
M03015_2.00	foxp4	-0.108592	Injury
M05207_2.00	meis1b	-0.10849	Injury
M06976	pbx4	-0.108434	Injury
M05590_2.00	roraa	-0.108431	Injury
M00834_2.00	tbx4	-0.108311	Injury
M09676_2.00	lhx4	-0.108289	Injury
M09516_2.00	klf6a	-0.108244	Injury
M05206_2.00	meis1b	-0.108202	Injury
M07296	mafba	-0.108085	Injury
M05751_2.00	sox12	-0.108055	Injury
M05041_2.00	vsx1	-0.108047	Injury
M11138_2.00	roraa	-0.107917	Injury
M03432_2.00	rorab	-0.107902	Injury
M03210_2.00	vsx1	-0.107855	Injury
M00458_2.00	isl2b	-0.107853	Injury
M06272_2.00	isl2b	-0.107853	Injury
M06498_2.00	isl2b	-0.107853	Injury
M05654_2.00	rarab	-0.107829	Injury
M05653_2.00	roraa	-0.107802	Injury
M03105_2.00	rx1	-0.107612	Injury
M03180_2.00	vsx1	-0.107516	Injury
M08981	vsx1	-0.107408	Injury
M02407_2.00	rarab	-0.107389	Injury
M05669_2.00	rarab	-0.107389	Injury
M05670_2.00	rarab	-0.107389	Injury
M07428	six3b	-0.106988	Injury
M05885_2.00	rarga	-0.106983	Injury
M09293_2.00	rarab	-0.106842	Injury
M06215_2.00	lhx9	-0.106798	Injury
M02407_2.00	roraa	-0.106787	Injury
M05669_2.00	roraa	-0.106787	Injury
M05670_2.00	roraa	-0.106787	Injury
M00812_2.00	rarab	-0.106784	Injury
M11140_2.00	rorab	-0.10674	Injury
M10526_2.00	foxp4	-0.106739	Injury
M03926_2.00	rarab	-0.106642	Injury
M02400_2.00	roraa	-0.106499	Injury
M03393_2.00	rorab	-0.106499	Injury
M03492_2.00	sox11b	-0.106438	Injury
M02399_2.00	rarga	-0.106417	Injury
M05657_2.00	esr2a	-0.106417	Injury
M08299_2.00	klf12a	-0.106273	Injury
M03421_2.00	rorab	-0.106271	Injury
M02110_2.00	pbx3b	-0.106221	Injury
M05844_2.00	zeb1b	-0.106208	Injury
M03435_2.00	rorb	-0.106163	Injury
M01690_2.00	hmga1a	-0.106138	Injury
M00281_2.00	rx1	-0.106122	Injury
M03269_2.00	lhx2b	-0.105921	Injury
M05884_2.00	nr2f1b	-0.1059	Injury
M09265_2.00	ppardb	-0.105671	Injury
M09327_2.00	ppardb	-0.105671	Injury
M06413_2.00	nr2f1b	-0.105518	Injury
M08034_2.00	esr2a	-0.105476	Injury
M09692_2.00	smad5	-0.105363	Injury
M02706_2.00	nr2f1b	-0.105345	Injury
M00116_2.00	arid5b	-0.105318	Injury
M08955	rxraa	-0.105304	Injury
M03859_2.00	meis1b	-0.105297	Injury
M03860_2.00	meis1b	-0.105297	Injury
M06490_2.00	meis1b	-0.105297	Injury
M06534_2.00	meis1b	-0.105297	Injury
M06535_2.00	meis1b	-0.105297	Injury
M09275_2.00	nr2f5	-0.105267	Injury
M05039_2.00	vsx1	-0.105225	Injury
M08156_2.00	thrab	-0.105152	Injury
M02426_2.00	pax6b	-0.105115	Injury
M08224_2.00	roraa	-0.105032	Injury
M09301_2.00	rorab	-0.105031	Injury
M03871_2.00	vsx1	-0.104959	Injury
M03217_2.00	lhx2b	-0.10493	Injury
M10282_2.00	zbtb18	-0.104881	Injury
M02396_2.00	rarga	-0.104871	Injury
M05302_2.00	vax2	-0.104784	Injury
M07078	bhlhe40	-0.104709	Injury
M08224_2.00	rorab	-0.104632	Injury
M04490	rxraa	-0.104515	Injury
M00979	pax6b	-0.104447	Injury
M11331_2.00	sox11b	-0.104382	Injury
M05590_2.00	nr2f5	-0.104359	Injury
M09616_2.00	raraa	-0.10431	Injury
M02496_2.00	tbx4	-0.104274	Injury
M05643_2.00	rarga	-0.104244	Injury
M05634_2.00	rxraa	-0.104159	Injury
M05607_2.00	raraa	-0.104044	Injury
M05303_2.00	vax2	-0.104044	Injury
M09319_2.00	esr2a	-0.103903	Injury
M09282_2.00	nr2f1a	-0.103887	Injury
M09324_2.00	nr2f1a	-0.103887	Injury
M05651_2.00	rarab	-0.103881	Injury
M09571_2.00	rx1	-0.103782	Injury
M03423_2.00	rxraa	-0.103722	Injury
M02404_2.00	raraa	-0.103706	Injury
M03241_2.00	isl2b	-0.103591	Injury
M08157_2.00	rarga	-0.103561	Injury
M05878_2.00	nr2f5	-0.103472	Injury
M06418_2.00	nr2f5	-0.103472	Injury
M06423_2.00	nr2f5	-0.103472	Injury
M06435_2.00	nr2f5	-0.103472	Injury
M03542	nr2f5	-0.103472	Injury
M08397_2.00	scrt1a	-0.103445	Injury
M06230_2.00	lhx4	-0.103352	Injury
M06365_2.00	lhx4	-0.103352	Injury
M04762_2.00	erfl3	-0.103295	Injury
M05599_2.00	rarga	-0.103184	Injury
M05300_2.00	rx1	-0.103171	Injury
M08091_2.00	klf6a	-0.10307	Injury
M03407_2.00	rorab	-0.103053	Injury
M03875_2.00	vax2	-0.10303	Injury
M05567_2.00	raraa	-0.103003	Injury
M05583_2.00	rorab	-0.102996	Injury
M03809	rxraa	-0.102991	Injury
M04765_2.00	erf	-0.10295	Injury
M02424_2.00	rarga	-0.102943	Injury
M05654_2.00	rarga	-0.102936	Injury
M00263_2.00	rx1	-0.102928	Injury
M10117	zeb1b	-0.102876	Injury
M10093_2.00	zeb1b	-0.102853	Injury
M00073	zeb1b	-0.102853	Injury
M08871_2.00	klf6a	-0.102738	Injury
M05882_2.00	rorab	-0.102579	Injury
M08156_2.00	raraa	-0.102458	Injury
M03377_2.00	rorab	-0.102424	Injury
M05641_2.00	rarab	-0.10242	Injury
M09187_2.00	rx1	-0.102411	Injury
M06382_2.00	lhx4	-0.10241	Injury
M06553_2.00	lhx4	-0.10241	Injury
M08237	erf	-0.102355	Injury
M06426_2.00	roraa	-0.102354	Injury
M00309_2.00	vsx1	-0.102318	Injury
M03122_2.00	lhx2b	-0.102304	Injury
M06139_2.00	scrt1a	-0.102284	Injury
M03408_2.00	rorab	-0.102208	Injury
M01672_2.00	hmga1a	-0.102004	Injury
M09692_2.00	smad3b	-0.10199	Injury
M03021_2.00	foxo4	-0.101979	Injury
M04738_2.00	erf	-0.101954	Injury
M00264_2.00	rx1	-0.101849	Injury
M05654_2.00	raraa	-0.101813	Injury
M05717_2.00	rfx1a	-0.101691	Injury
M04766_2.00	erf	-0.10155	Injury
M08158_2.00	rorcb	-0.101539	Injury
M00819_2.00	rxrgb	-0.101501	Injury
M00532_2.00	lhx4	-0.101488	Injury
M02880_2.00	glis1b	-0.101416	Injury
M05593_2.00	rorb	-0.101409	Injury
M02410_2.00	thrab	-0.101177	Injury
M10350	prdm5	-0.101117	Injury
M00184_2.00	rarab	-0.101108	Injury
M00822_2.00	rarab	-0.101108	Injury
M02392_2.00	rarab	-0.101108	Injury
M03424_2.00	rxraa	-0.10102	Injury
M08848_2.00	zeb1b	-0.100987	Injury
M08849_2.00	zeb1b	-0.100987	Injury
M05681_2.00	rorab	-0.100954	Injury
M02426_2.00	pax6a	-0.100882	Injury
M04771_2.00	erf	-0.100854	Injury
M10089_2.00	zeb1b	-0.100817	Injury
M00751_2.00	hmga1a	-0.100801	Injury
M00134_2.00	klf12b	-0.100775	Injury
M01016_2.00	foxn3	-0.100698	Injury
M06270_2.00	isl2b	-0.10066	Injury
M05878_2.00	raraa	-0.100634	Injury
M06418_2.00	raraa	-0.100634	Injury
M06423_2.00	raraa	-0.100634	Injury
M06435_2.00	raraa	-0.100634	Injury
M05590_2.00	rorb	-0.100589	Injury
M09313_2.00	nr2f1a	-0.100573	Injury
M08153_2.00	rxraa	-0.100502	Injury
M02498_2.00	tbx4	-0.100484	Injury
M03404_2.00	rarga	-0.100475	Injury
M09781	pbx3b	-0.100466	Injury
M09271_2.00	raraa	-0.100459	Injury
M03974_2.00	sox11b	-0.100457	Injury
M05617_2.00	rorab	-0.100436	Injury
M00462_2.00	vsx1	-0.100305	Injury
M06330_2.00	vsx1	-0.100305	Injury
M06495_2.00	vsx1	-0.100305	Injury
M06528_2.00	vsx1	-0.100305	Injury
M06537_2.00	vsx1	-0.100305	Injury
M03794_2.00	vsx1	-0.10029	Injury
M02995_2.00	erfl3	-0.100254	Injury
M07985_2.00	rarab	-0.10025	Injury
M05663_2.00	rarab	-0.100187	Injury
M05613_2.00	roraa	-0.10009	Injury
M04513_2.00	klf15	-0.100089	Injury
M00412	zeb1b	-0.100078	Injury
M03128_2.00	vsx1	-0.100015	Injury
M03186_2.00	vsx1	-0.100015	Injury
M03879_2.00	vsx1	-0.100015	Injury
M03880_2.00	vsx1	-0.100015	Injury
M04411_2.00	klf12b	-0.0999978	Injury
M03415_2.00	rorab	-0.099933	Injury
M09689_2.00	rxrgb	-0.0999156	Injury
M05653_2.00	rarga	-0.0998655	Injury
M00412_2.00	six3b	-0.0998377	Injury
M03381_2.00	roraa	-0.0997295	Injury
M01967	pbx1a	-0.0996639	Injury
M03106_2.00	vsx1	-0.0995916	Injury
M03917	scrt1a	-0.0995736	Injury
M03406_2.00	raraa	-0.0995241	Injury
M02423_2.00	rxrgb	-0.0993807	Injury
M05653_2.00	rarab	-0.09935	Injury
M00368_2.00	roraa	-0.0993404	Injury
M05593_2.00	rarab	-0.0993166	Injury
M03370_2.00	rorab	-0.0993152	Injury
M02407_2.00	rarga	-0.0993035	Injury
M05669_2.00	rarga	-0.0993035	Injury
M05670_2.00	rarga	-0.0993035	Injury
M02929_2.00	scrt1a	-0.0992841	Injury
M06544_2.00	lhx4	-0.0992063	Injury
M05567_2.00	rorab	-0.0991993	Injury
M05570_2.00	rarga	-0.0991763	Injury
M05647_2.00	rorab	-0.0991487	Injury
M03241_2.00	isl1	-0.0991005	Injury
M02416_2.00	roraa	-0.0990658	Injury
M00284_2.00	lhx4	-0.0989942	Injury
M06214_2.00	lhx4	-0.0989942	Injury
M06236_2.00	lhx4	-0.0989942	Injury
M06240_2.00	lhx4	-0.0989942	Injury
M06242_2.00	lhx4	-0.0989942	Injury
M06317_2.00	lhx4	-0.0989942	Injury
M09280_2.00	rorab	-0.0989497	Injury
M04655_2.00	scrt1a	-0.0989402	Injury
M04831	zeb1b	-0.0989096	Injury
M05582_2.00	roraa	-0.098908	Injury
M03387_2.00	rorab	-0.0988576	Injury
M03155_2.00	lhx4	-0.0988523	Injury
M02995_2.00	erf	-0.0988474	Injury
M00185_2.00	roraa	-0.0987222	Injury
M08461_2.00	roraa	-0.0987222	Injury
M04644_2.00	scrt1a	-0.0986601	Injury
M03172_2.00	vsx1	-0.0986101	Injury
M03182_2.00	vsx1	-0.0986018	Injury
M03289_2.00	vsx1	-0.0986018	Injury
M03789_2.00	vsx1	-0.0986018	Injury
M03831_2.00	vsx1	-0.0986018	Injury
M04985_2.00	vsx1	-0.0986018	Injury
M05030_2.00	vsx1	-0.0986018	Injury
M05031_2.00	vsx1	-0.0986018	Injury
M05036_2.00	vsx1	-0.0986018	Injury
M05145_2.00	vsx1	-0.0986018	Injury
M05147_2.00	vsx1	-0.0986018	Injury
M05148_2.00	vsx1	-0.0986018	Injury
M05237_2.00	vsx1	-0.0986018	Injury
M05239_2.00	vsx1	-0.0986018	Injury
M05267_2.00	vsx1	-0.0986018	Injury
M05295_2.00	vsx1	-0.0986018	Injury
M05296_2.00	vsx1	-0.0986018	Injury
M05390_2.00	vsx1	-0.0986018	Injury
M05391_2.00	vsx1	-0.0986018	Injury
M03409_2.00	rarab	-0.098529	Injury
M00979	pax6a	-0.0984647	Injury
M09309_2.00	raraa	-0.0984325	Injury
M09267_2.00	roraa	-0.0984124	Injury
M05302_2.00	lhx9	-0.098314	Injury
M09583_2.00	vsx1	-0.0982185	Injury
M02424_2.00	rarab	-0.0981893	Injury
M04656_2.00	scrt1a	-0.098162	Injury
M11090_2.00	ppardb	-0.0981206	Injury
M00368_2.00	rarab	-0.0979439	Injury
M05609_2.00	rxraa	-0.097913	Injury
M03895	ctcf	-0.0979026	Injury
M04643_2.00	scrt1a	-0.0978533	Injury
M04464_2.00	klf6a	-0.0976225	Injury
M08156_2.00	rorab	-0.0976156	Injury
M02405_2.00	raraa	-0.0975429	Injury
M08120_2.00	FOXK2	-0.0975323	Injury
M09615_2.00	raraa	-0.0972727	Injury
M09292_2.00	rarab	-0.0972513	Injury
M05317_2.00	meis1b	-0.0972512	Injury
M03889	tbx2b	-0.0971907	Injury
M04779_2.00	erf	-0.0971647	Injury
M00169_2.00	six3b	-0.0971422	Injury
M07235	zeb1b	-0.097118	Injury
M03411_2.00	rxraa	-0.0970888	Injury
M05633_2.00	roraa	-0.0970736	Injury
M03276_2.00	vsx1	-0.0970296	Injury
M05593_2.00	nr2f5	-0.0970239	Injury
M03427_2.00	nr2e1	-0.0969977	Injury
M09320_2.00	raraa	-0.0968895	Injury
M00561_2.00	vsx1	-0.0968235	Injury
M05683_2.00	rorab	-0.0968002	Injury
M04401_2.00	klf12a	-0.0967219	Injury
M02878_2.00	ctcf	-0.0966553	Injury
M05581_2.00	rorab	-0.096608	Injury
M00787_2.00	klf12a	-0.0965985	Injury
M03405_2.00	raraa	-0.0965354	Injury
M09294_2.00	nr2f1b	-0.0965245	Injury
M00280_2.00	lhx4	-0.0964882	Injury
M04511_2.00	klf15	-0.0964815	Injury
M06417_2.00	rarga	-0.0964712	Injury
M00458_2.00	isl1	-0.096417	Injury
M06272_2.00	isl1	-0.096417	Injury
M06498_2.00	isl1	-0.096417	Injury
M08872	bhlhe40	-0.0963842	Injury
M05799_2.00	tbx3a	-0.0963492	Injury
M06086_2.00	scrt1a	-0.0963432	Injury
M08157_2.00	rarab	-0.096286	Injury
M04773_2.00	erfl3	-0.0962764	Injury
M06426_2.00	rarab	-0.0962648	Injury
M03406_2.00	rxraa	-0.0962417	Injury
M09305_2.00	thrab	-0.0961639	Injury
M05663_2.00	rorab	-0.0960731	Injury
M08221_2.00	rorca	-0.0960628	Injury
M06435_2.00	vdrb	-0.0960322	Injury
M03569	vdrb	-0.0960322	Injury
M09325_2.00	rarga	-0.0959628	Injury
M03273_2.00	lhx2b	-0.0959231	Injury
M03823_2.00	vsx1	-0.0958894	Injury
M05259_2.00	vsx1	-0.0958894	Injury
M05261_2.00	vsx1	-0.0958894	Injury
M05671_2.00	rarga	-0.0958653	Injury
M03059_2.00	foxp4	-0.0958181	Injury
M01034	mxd4	-0.0957822	Injury
M09616_2.00	rorcb	-0.0956909	Injury
M02498_2.00	tbx3a	-0.0956209	Injury
M05593_2.00	roraa	-0.0955031	Injury
M02400_2.00	thrab	-0.0954857	Injury
M06140_2.00	scrt1a	-0.0954366	Injury
M05600_2.00	raraa	-0.0954025	Injury
M09329_2.00	rorab	-0.0951023	Injury
M01030_2.00	tbx4	-0.0950751	Injury
M05802_2.00	tbx2a	-0.0950266	Injury
M05590_2.00	rxraa	-0.0949597	Injury
M05303_2.00	lhx9	-0.0948601	Injury
M05761_2.00	sox12	-0.0947542	Injury
M06164_2.00	klf12b	-0.0947277	Injury
M03410_2.00	rorab	-0.0947003	Injury
M08153_2.00	raraa	-0.0946996	Injury
M05715_2.00	rfx1a	-0.0946304	Injury
M04779_2.00	erfl3	-0.0946167	Injury
M04937_2.00	lhx4	-0.0945563	Injury
M09502_2.00	klf6a	-0.0945202	Injury
M03424_2.00	rorab	-0.0944616	Injury
M00816_2.00	rxraa	-0.0944323	Injury
M06433_2.00	rxraa	-0.0944323	Injury
M05878_2.00	rorb	-0.0944117	Injury
M06418_2.00	rorb	-0.0944117	Injury
M06423_2.00	rorb	-0.0944117	Injury
M06435_2.00	rorb	-0.0944117	Injury
M05762_2.00	sox12	-0.0944086	Injury
M08156_2.00	rxraa	-0.0943743	Injury
M00325_2.00	six3b	-0.0942014	Injury
M01714	klf15	-0.0941127	Injury
M03391_2.00	roraa	-0.0940608	Injury
M09616_2.00	rorca	-0.0939761	Injury
M09678_2.00	rx2	-0.0939563	Injury
M03183_2.00	lhx4	-0.0939472	Injury
M11193_2.00	rxraa	-0.0938748	Injury
M00816_2.00	raraa	-0.0938011	Injury
M03691_2.00	scrt1a	-0.0937951	Injury
M08911	ctcf	-0.093793	Injury
M08157_2.00	roraa	-0.093722	Injury
M09169_2.00	vsx1	-0.0936411	Injury
M06382_2.00	vsx1	-0.0936008	Injury
M06553_2.00	vsx1	-0.0936008	Injury
M03813_2.00	lhx2b	-0.0935284	Injury
M05033_2.00	meis1b	-0.0935107	Injury
M02406_2.00	raraa	-0.0934619	Injury
M09306_2.00	rarab	-0.0934465	Injury
M00318_2.00	lhx4	-0.0934068	Injury
M02200_2.00	lhx4	-0.0934068	Injury
M03791_2.00	vsx1	-0.0933607	Injury
M09611_2.00	roraa	-0.0933364	Injury
M05667_2.00	rorab	-0.0932874	Injury
M03225_2.00	vsx1	-0.0931747	Injury
M08223_2.00	rorab	-0.0931532	Injury
M05683_2.00	rarga	-0.0931461	Injury
M00531_2.00	lhx4	-0.0931025	Injury
M05254_2.00	lhx4	-0.0931025	Injury
M02993_2.00	erfl3	-0.0929883	Injury
M08962	rxraa	-0.0929266	Injury
M06163_2.00	klf6a	-0.0928926	Injury
M00817_2.00	esr2a	-0.0928057	Injury
M05645_2.00	rarga	-0.0927888	Injury
M03928_2.00	nr2f1b	-0.0927778	Injury
M05878_2.00	esr2a	-0.092759	Injury
M06423_2.00	esr2a	-0.092759	Injury
M03369_2.00	rorab	-0.0927421	Injury
M05667_2.00	rarga	-0.092699	Injury
M00414_2.00	vsx1	-0.0926588	Injury
M09160_2.00	rx1	-0.0926476	Injury
M09201_2.00	rx1	-0.0926476	Injury
M06417_2.00	roraa	-0.0926406	Injury
M03841_2.00	lhx9	-0.0926313	Injury
M03673_2.00	scrt1a	-0.0926216	Injury
M03508_2.00	sox11b	-0.092611	Injury
M09628_2.00	rfx1a	-0.0925891	Injury
M05799_2.00	tbx2b	-0.0924606	Injury
M03762_2.00	trps1	-0.0923984	Injury
M05651_2.00	raraa	-0.0923863	Injury
M01037	glis1b	-0.0922876	Injury
M09113_2.00	FOXK2	-0.092212	Injury
M01122	znf219	-0.0922074	Injury
M09276_2.00	nr2f1a	-0.092102	Injury
M09310_2.00	nr2f1a	-0.092102	Injury
M00513_2.00	pbx3b	-0.0920798	Injury
M09334_2.00	rorab	-0.0919918	Injury
M09617_2.00	nr2f1a	-0.091931	Injury
M09293_2.00	rarga	-0.0918929	Injury
M00983	mafba	-0.0918812	Injury
M03875_2.00	lhx9	-0.0918742	Injury
M07280	rarab	-0.091857	Injury
M07126	smad3a	-0.0918176	Injury
M05880_2.00	nr2f1a	-0.0916676	Injury
M00465_2.00	vsx1	-0.0916284	Injury
M03370_2.00	rarga	-0.0914433	Injury
M05885_2.00	raraa	-0.091388	Injury
M03386_2.00	thrab	-0.0913837	Injury
M06169_2.00	klf12b	-0.0913269	Injury
M07371	zeb1b	-0.0913204	Injury
M00253_2.00	foxp4	-0.0912801	Injury
M03409_2.00	raraa	-0.0912585	Injury
M07993_2.00	rarab	-0.0912023	Injury
M09325_2.00	raraa	-0.0910096	Injury
M09366_2.00	rfx1a	-0.0910022	Injury
M03926_2.00	rarga	-0.0909701	Injury
M03353_2.00	roraa	-0.0909087	Injury
M02925_2.00	scrt1a	-0.0908795	Injury
M08907_2.00	si:ch211-117k10.3	-0.0907942	Injury
M08987_2.00	si:ch211-117k10.3	-0.0907942	Injury
M05567_2.00	rorb	-0.0907216	Injury
M02115_2.00	rx1	-0.0905955	Injury
M03456_2.00	rfx1a	-0.0905757	Injury
M07985_2.00	roraa	-0.0905367	Injury
M03000_2.00	erfl3	-0.0905111	Injury
M00831_2.00	tbx3a	-0.0905038	Injury
M00833_2.00	tbx3a	-0.0905038	Injury
M01029_2.00	tbx3a	-0.0905038	Injury
M03552_2.00	tbx3a	-0.0905038	Injury
M03558_2.00	tbx3a	-0.0905038	Injury
M09649_2.00	tbx3a	-0.0905038	Injury
M08786	tbx3a	-0.0905038	Injury
M03513_2.00	sox11b	-0.0903879	Injury
M05607_2.00	rarab	-0.090337	Injury
M03215_2.00	vsx1	-0.0903076	Injury
M09086_2.00	FOXK2	-0.0902948	Injury
M09571_2.00	hmx4	-0.0902764	Injury
M10805_2.00	rx2	-0.0902736	Injury
M05615_2.00	rorab	-0.090263	Injury
M03420_2.00	rorab	-0.0902438	Injury
M00285_2.00	lhx2b	-0.0902102	Injury
M09292_2.00	rorab	-0.0902055	Injury
M09541_2.00	FOXK2	-0.0901956	Injury
M05720_2.00	rfx1a	-0.0901618	Injury
M03369_2.00	rorb	-0.0901577	Injury
M09503_2.00	ctcf	-0.0901204	Injury
M03959_2.00	rfx1a	-0.0899747	Injury
M08965_2.00	klf12b	-0.0899737	Injury
M04736_2.00	erf	-0.0899026	Injury
M06430_2.00	rarga	-0.0899013	Injury
M01358	six3b	-0.0898911	Injury
M09305_2.00	rorb	-0.0898887	Injury
M08350_2.00	zbtb18	-0.0898594	Injury
M01686_2.00	hmga1a	-0.089809	Injury
M09306_2.00	raraa	-0.089767	Injury
M09292_2.00	rarga	-0.0896812	Injury
M03355_2.00	rarab	-0.0896419	Injury
M09333_2.00	roraa	-0.0896166	Injury
M09267_2.00	raraa	-0.0895566	Injury
M09380_2.00	smad3a	-0.0895233	Injury
M09384_2.00	smad3a	-0.0895233	Injury
M10060	smad3a	-0.0894998	Injury
M10367	smad3a	-0.0894998	Injury
M08964_2.00	klf12b	-0.0894562	Injury
M05247_2.00	meis1b	-0.0894504	Injury
M03381_2.00	nr2f5	-0.0894398	Injury
M03387_2.00	rarab	-0.089411	Injury
M06430_2.00	rarab	-0.0893597	Injury
M03878	hivep2a	-0.0893293	Injury
M07906_2.00	ctcf	-0.0893251	Injury
M02388_2.00	raraa	-0.0893182	Injury
M05883_2.00	nr2f1a	-0.0892246	Injury
M03461_2.00	rfx1a	-0.0892221	Injury
M07920_2.00	ctcf	-0.0891639	Injury
M09306_2.00	rorab	-0.0891471	Injury
M03411_2.00	rarga	-0.089027	Injury
M09001	rarga	-0.088968	Injury
M03213_2.00	lhx4	-0.0889437	Injury
M06270_2.00	isl1	-0.0888042	Injury
M05628_2.00	roraa	-0.0888006	Injury
M03934_2.00	rarab	-0.0887997	Injury
M02734_2.00	erf	-0.0886434	Injury
M03418_2.00	rorab	-0.0884948	Injury
M05564_2.00	rarab	-0.0884457	Injury
M09602	ctcf	-0.0884107	Injury
M00816_2.00	nr2f5	-0.0884078	Injury
M05683_2.00	rxraa	-0.0883982	Injury
M06087_2.00	scrt1a	-0.0883895	Injury
M09277_2.00	rorab	-0.088359	Injury
M03841_2.00	vax2	-0.0883412	Injury
M06522_2.00	lmx1al	-0.0882365	Injury
M09620_2.00	rorab	-0.0881865	Injury
M06416_2.00	nr2f1a	-0.0880848	Injury
M07991_2.00	rorca	-0.0880682	Injury
M09393_2.00	tcf7	-0.0880349	Injury
M03160_2.00	rx1	-0.0880164	Injury
M05884_2.00	nr2f1a	-0.0879915	Injury
M00266_2.00	rx1	-0.0879733	Injury
M00268_2.00	rx1	-0.0879733	Injury
M00269_2.00	rx1	-0.0879733	Injury
M05721_2.00	rfx1a	-0.087949	Injury
M07916_2.00	ctcf	-0.0879428	Injury
M00278_2.00	rx1	-0.0878806	Injury
M07907_2.00	ctcf	-0.0877699	Injury
M03874_2.00	lhx9	-0.0877673	Injury
M05634_2.00	roraa	-0.0877477	Injury
M05653_2.00	raraa	-0.0877446	Injury
M06213_2.00	lhx4	-0.0877381	Injury
M10741_2.00	rx1	-0.0876561	Injury
M09828	ctcf	-0.0875639	Injury
M03405_2.00	rxraa	-0.0875637	Injury
M00183_2.00	esr2a	-0.0875445	Injury
M00257_2.00	foxp4	-0.08742	Injury
M02705_2.00	ppardb	-0.0873945	Injury
M05719_2.00	rfx1a	-0.0872892	Injury
M03849_2.00	vax2	-0.0872765	Injury
M03454_2.00	rfx1a	-0.0871989	Injury
M08897	smad6b	-0.0871876	Injury
M00185_2.00	rxraa	-0.0871699	Injury
M08461_2.00	rxraa	-0.0871699	Injury
M03435_2.00	raraa	-0.0871679	Injury
M03373_2.00	rorb	-0.0871435	Injury
M07909_2.00	ctcf	-0.0870436	Injury
M03404_2.00	thrab	-0.0870194	Injury
M03386_2.00	rorab	-0.0870172	Injury
M00181_2.00	roraa	-0.0868962	Injury
M07862_2.00	ctcf	-0.0868026	Injury
M03851_2.00	lhx4	-0.0867895	Injury
M05724_2.00	rfx1a	-0.0867829	Injury
M11138_2.00	rorab	-0.0867822	Injury
M03378_2.00	rxraa	-0.0867301	Injury
M05643_2.00	rxraa	-0.0867139	Injury
M03102_2.00	vsx1	-0.0866926	Injury
M03861_2.00	meis1b	-0.0865968	Injury
M03811_2.00	vsx1	-0.0865944	Injury
M08211_2.00	vax2	-0.0865883	Injury
M08115_2.00	FOXK2	-0.0865727	Injury
M08883	foxm1	-0.0865656	Injury
M09147_2.00	vax2	-0.086547	Injury
M06500_2.00	rx2	-0.0865447	Injury
M05061_2.00	lhx4	-0.0865342	Injury
M05222_2.00	lhx4	-0.0865342	Injury
M05723_2.00	rfx1a	-0.0864897	Injury
M05645_2.00	rorab	-0.0864858	Injury
M03396_2.00	rorab	-0.0864854	Injury
M05603_2.00	rarab	-0.0864692	Injury
M03876_2.00	lhx2b	-0.0864629	Injury
M03961_2.00	rfx1a	-0.0864611	Injury
M00267_2.00	rx1	-0.0864585	Injury
M00459_2.00	rx1	-0.0864585	Injury
M07915_2.00	ctcf	-0.0864459	Injury
M07868_2.00	ctcf	-0.0863954	Injury
M11191_2.00	rorab	-0.0863941	Injury
M02114_2.00	vsx1	-0.0863604	Injury
M05634_2.00	nr2f5	-0.0863289	Injury
M03794_2.00	lhx4	-0.0862664	Injury
M07869_2.00	ctcf	-0.086164	Injury
M07892_2.00	ctcf	-0.0861615	Injury
M07873_2.00	ctcf	-0.0860987	Injury
M07897_2.00	ctcf	-0.0860518	Injury
M05671_2.00	rxraa	-0.0860276	Injury
M08118_2.00	FOXK2	-0.0859797	Injury
M02396_2.00	raraa	-0.0857151	Injury
M09285_2.00	rorb	-0.0857012	Injury
M02033_2.00	rx1	-0.0856849	Injury
M04410_2.00	klf6a	-0.0855593	Injury
M03839	pax2b	-0.085459	Injury
M09329_2.00	rarab	-0.0854479	Injury
M08831	tbx2a	-0.0854401	Injury
M07866_2.00	ctcf	-0.0854281	Injury
M07887_2.00	ctcf	-0.0853774	Injury
M00811_2.00	raraa	-0.085369	Injury
M00282_2.00	vsx1	-0.0853066	Injury
M06321_2.00	vsx1	-0.0853066	Injury
M06350_2.00	vsx1	-0.0853066	Injury
M09562_2.00	vsx1	-0.0853066	Injury
M03874_2.00	vax2	-0.0852725	Injury
M03203_2.00	vsx1	-0.0851958	Injury
M03097_2.00	vsx1	-0.0851565	Injury
M00812_2.00	rarga	-0.0850812	Injury
M05564_2.00	rorab	-0.0850524	Injury
M03211_2.00	lhx4	-0.0850137	Injury
M07911_2.00	ctcf	-0.0849515	Injury
M05616_2.00	raraa	-0.0849413	Injury
M00254_2.00	FOXK2	-0.0849413	Injury
M03849_2.00	lhx9	-0.084933	Injury
M05614_2.00	rorb	-0.0849179	Injury
M04708	smc3	-0.0849004	Injury
M07917_2.00	ctcf	-0.0848768	Injury
M03403_2.00	rarab	-0.0848567	Injury
M05649_2.00	rorab	-0.0848554	Injury
M04842_2.00	FOXK2	-0.0848177	Injury
M02998_2.00	erfl3	-0.0848142	Injury
M03852_2.00	rx1	-0.0848108	Injury
M03423_2.00	rorab	-0.0847716	Injury
M05583_2.00	thrab	-0.08474	Injury
M00288_2.00	lhx4	-0.0846814	Injury
M03124_2.00	lhx4	-0.0846814	Injury
M05603_2.00	rarga	-0.0846761	Injury
M02426_2.00	pax2a	-0.0846502	Injury
M04514_2.00	klf15	-0.0845852	Injury
M04775_2.00	erf	-0.084562	Injury
M07908_2.00	ctcf	-0.0845527	Injury
M09295_2.00	rorab	-0.0845433	Injury
M08298_2.00	klf6a	-0.08451	Injury
M01879	hmga1a	-0.0844753	Injury
M09279_2.00	roraa	-0.0844676	Injury
M09311_2.00	roraa	-0.0844676	Injury
M05879_2.00	rarab	-0.0844547	Injury
M08427_2.00	smad5	-0.084448	Injury
M07902_2.00	ctcf	-0.0844401	Injury
M03164_2.00	rx2	-0.0844358	Injury
M04400_2.00	klf12a	-0.0843482	Injury
M03452_2.00	rfx1a	-0.0843097	Injury
M05636_2.00	rorb	-0.0843042	Injury
M09188_2.00	vsx1	-0.0842906	Injury
M05617_2.00	rarga	-0.0842784	Injury
M05613_2.00	rxraa	-0.0842761	Injury
M03405_2.00	rarga	-0.0842438	Injury
M09681	ctcf	-0.0842264	Injury
M03856_2.00	lhx2b	-0.0842143	Injury
M03541_2.00	sox11b	-0.0841809	Injury
M06417_2.00	nr2f5	-0.0841618	Injury
M00265_2.00	vsx1	-0.0841535	Injury
M00316_2.00	vsx1	-0.0841535	Injury
M00319_2.00	vsx1	-0.0841535	Injury
M00380_2.00	vsx1	-0.0841535	Injury
M00406_2.00	vsx1	-0.0841535	Injury
M00434_2.00	vsx1	-0.0841535	Injury
M02090_2.00	vsx1	-0.0841535	Injury
M02130_2.00	vsx1	-0.0841535	Injury
M02148_2.00	vsx1	-0.0841535	Injury
M02162_2.00	vsx1	-0.0841535	Injury
M02170_2.00	vsx1	-0.0841535	Injury
M02175_2.00	vsx1	-0.0841535	Injury
M02186_2.00	vsx1	-0.0841535	Injury
M03121_2.00	vsx1	-0.0841535	Injury
M03163_2.00	vsx1	-0.0841535	Injury
M03200_2.00	vsx1	-0.0841535	Injury
M03214_2.00	vsx1	-0.0841535	Injury
M03219_2.00	vsx1	-0.0841535	Injury
M03220_2.00	vsx1	-0.0841535	Injury
M03263_2.00	vsx1	-0.0841535	Injury
M03267_2.00	vsx1	-0.0841535	Injury
M03793_2.00	vsx1	-0.0841535	Injury
M03815_2.00	vsx1	-0.0841535	Injury
M03824_2.00	vsx1	-0.0841535	Injury
M03866_2.00	vsx1	-0.0841535	Injury
M04895_2.00	vsx1	-0.0841535	Injury
M04896_2.00	vsx1	-0.0841535	Injury
M04917_2.00	vsx1	-0.0841535	Injury
M04918_2.00	vsx1	-0.0841535	Injury
M04994_2.00	vsx1	-0.0841535	Injury
M05170_2.00	vsx1	-0.0841535	Injury
M05171_2.00	vsx1	-0.0841535	Injury
M05173_2.00	vsx1	-0.0841535	Injury
M05174_2.00	vsx1	-0.0841535	Injury
M05195_2.00	vsx1	-0.0841535	Injury
M05196_2.00	vsx1	-0.0841535	Injury
M05198_2.00	vsx1	-0.0841535	Injury
M05199_2.00	vsx1	-0.0841535	Injury
M05210_2.00	vsx1	-0.0841535	Injury
M05212_2.00	vsx1	-0.0841535	Injury
M05240_2.00	vsx1	-0.0841535	Injury
M05245_2.00	vsx1	-0.0841535	Injury
M05262_2.00	vsx1	-0.0841535	Injury
M05263_2.00	vsx1	-0.0841535	Injury
M05304_2.00	vsx1	-0.0841535	Injury
M05305_2.00	vsx1	-0.0841535	Injury
M05307_2.00	vsx1	-0.0841535	Injury
M05308_2.00	vsx1	-0.0841535	Injury
M05366_2.00	vsx1	-0.0841535	Injury
M05367_2.00	vsx1	-0.0841535	Injury
M03525_2.00	sox11b	-0.0841278	Injury
M08222_2.00	rorb	-0.0841166	Injury
M04731_2.00	erfl3	-0.0841153	Injury
M00286_2.00	lhx4	-0.0841031	Injury
M00402_2.00	lhx4	-0.0841031	Injury
M00430_2.00	lhx4	-0.0841031	Injury
M00482_2.00	lhx4	-0.0841031	Injury
M00486_2.00	lhx4	-0.0841031	Injury
M00498_2.00	lhx4	-0.0841031	Injury
M00501_2.00	lhx4	-0.0841031	Injury
M00519_2.00	lhx4	-0.0841031	Injury
M06212_2.00	lhx4	-0.0841031	Injury
M06216_2.00	lhx4	-0.0841031	Injury
M06235_2.00	lhx4	-0.0841031	Injury
M06239_2.00	lhx4	-0.0841031	Injury
M06259_2.00	lhx4	-0.0841031	Injury
M06265_2.00	lhx4	-0.0841031	Injury
M06281_2.00	lhx4	-0.0841031	Injury
M06291_2.00	lhx4	-0.0841031	Injury
M06294_2.00	lhx4	-0.0841031	Injury
M06302_2.00	lhx4	-0.0841031	Injury
M06303_2.00	lhx4	-0.0841031	Injury
M06304_2.00	lhx4	-0.0841031	Injury
M06310_2.00	lhx4	-0.0841031	Injury
M06312_2.00	lhx4	-0.0841031	Injury
M06318_2.00	lhx4	-0.0841031	Injury
M06322_2.00	lhx4	-0.0841031	Injury
M06332_2.00	lhx4	-0.0841031	Injury
M06333_2.00	lhx4	-0.0841031	Injury
M06337_2.00	lhx4	-0.0841031	Injury
M06338_2.00	lhx4	-0.0841031	Injury
M06351_2.00	lhx4	-0.0841031	Injury
M06354_2.00	lhx4	-0.0841031	Injury
M06355_2.00	lhx4	-0.0841031	Injury
M06364_2.00	lhx4	-0.0841031	Injury
M06367_2.00	lhx4	-0.0841031	Injury
M06370_2.00	lhx4	-0.0841031	Injury
M06371_2.00	lhx4	-0.0841031	Injury
M06380_2.00	lhx4	-0.0841031	Injury
M06381_2.00	lhx4	-0.0841031	Injury
M06477_2.00	lhx4	-0.0841031	Injury
M06478_2.00	lhx4	-0.0841031	Injury
M06484_2.00	lhx4	-0.0841031	Injury
M06485_2.00	lhx4	-0.0841031	Injury
M06486_2.00	lhx4	-0.0841031	Injury
M06492_2.00	lhx4	-0.0841031	Injury
M06501_2.00	lhx4	-0.0841031	Injury
M06506_2.00	lhx4	-0.0841031	Injury
M06507_2.00	lhx4	-0.0841031	Injury
M06511_2.00	lhx4	-0.0841031	Injury
M06513_2.00	lhx4	-0.0841031	Injury
M06516_2.00	lhx4	-0.0841031	Injury
M06517_2.00	lhx4	-0.0841031	Injury
M06520_2.00	lhx4	-0.0841031	Injury
M06525_2.00	lhx4	-0.0841031	Injury
M06527_2.00	lhx4	-0.0841031	Injury
M06529_2.00	lhx4	-0.0841031	Injury
M06531_2.00	lhx4	-0.0841031	Injury
M06539_2.00	lhx4	-0.0841031	Injury
M06545_2.00	lhx4	-0.0841031	Injury
M06546_2.00	lhx4	-0.0841031	Injury
M06547_2.00	lhx4	-0.0841031	Injury
M06552_2.00	lhx4	-0.0841031	Injury
M09156_2.00	lhx4	-0.0841031	Injury
M09207_2.00	lhx4	-0.0841031	Injury
M05563_2.00	roraa	-0.0840934	Injury
M03400_2.00	esr2a	-0.0840748	Injury
M03152_2.00	lhx4	-0.0840666	Injury
M03355_2.00	rarga	-0.0839993	Injury
M06229_2.00	vsx1	-0.0839864	Injury
M03278_2.00	rx1	-0.083957	Injury
M09329_2.00	rxraa	-0.0839269	Injury
M01037	gli3	-0.0839077	Injury
M02410_2.00	raraa	-0.0838995	Injury
M00446_2.00	lhx4	-0.0838886	Injury
M03119_2.00	lhx4	-0.0838886	Injury
M03156_2.00	lhx4	-0.0838886	Injury
M04936_2.00	lhx4	-0.0838886	Injury
M04938_2.00	lhx4	-0.0838886	Injury
M05063_2.00	lhx4	-0.0838886	Injury
M05217_2.00	lhx4	-0.0838886	Injury
M05253_2.00	lhx4	-0.0838886	Injury
M05329_2.00	lhx4	-0.0838886	Injury
M09620_2.00	rarab	-0.083885	Injury
M03380_2.00	rorb	-0.0838423	Injury
M09329_2.00	rarga	-0.0838398	Injury
M05613_2.00	rorcb	-0.0838246	Injury
M11091_2.00	nr2f1a	-0.0838151	Injury
M10352	rarab	-0.0837947	Injury
M09275_2.00	rorcb	-0.0837923	Injury
M03496_2.00	sox11b	-0.0837915	Injury
M00184_2.00	roraa	-0.0837856	Injury
M00822_2.00	roraa	-0.0837856	Injury
M02392_2.00	roraa	-0.0837856	Injury
M10186_2.00	klf7a	-0.0837698	Injury
M11180_2.00	roraa	-0.0837666	Injury
M05722_2.00	rfx1a	-0.0837517	Injury
M02402_2.00	rarab	-0.0837424	Injury
M03972_2.00	sox11b	-0.0836986	Injury
M08220_2.00	nr6a1a	-0.0836125	Injury
M08158_2.00	rorca	-0.0835992	Injury
M09147_2.00	rx1	-0.0835939	Injury
M09320_2.00	rorcb	-0.0835568	Injury
M08299_2.00	klf6a	-0.0835545	Injury
M07884_2.00	ctcf	-0.0835035	Injury
M06482_2.00	vsx1	-0.0834988	Injury
M09275_2.00	rorca	-0.0834834	Injury
M09322_2.00	rxraa	-0.0834275	Injury
M07886_2.00	ctcf	-0.0834101	Injury
M07890_2.00	ctcf	-0.083358	Injury
M09611_2.00	rorab	-0.0833408	Injury
M05617_2.00	rxraa	-0.0832655	Injury
M02746_2.00	rorb	-0.0832082	Injury
M06234_2.00	rx2	-0.0831943	Injury
M01668_2.00	arid5b	-0.0831907	Injury
M01297_2.00	esrrga	-0.0831672	Injury
M03424_2.00	nr2f5	-0.0831498	Injury
M05800_2.00	tbx4	-0.0831475	Injury
M03463_2.00	rfx1a	-0.0831158	Injury
M07992_2.00	rorca	-0.0830159	Injury
M03079_2.00	rx1	-0.0829875	Injury
M05651_2.00	rxraa	-0.0829459	Injury
M05599_2.00	raraa	-0.0829273	Injury
M02416_2.00	rxraa	-0.0828828	Injury
M00469_2.00	lhx4	-0.0828662	Injury
M08118_2.00	foxp4	-0.0828484	Injury
M08375	meis1b	-0.0828311	Injury
M08087_2.00	ctcf	-0.0828268	Injury
M09615_2.00	rorcb	-0.0828101	Injury
M03416_2.00	rorab	-0.0827773	Injury
M09627_2.00	rfx1a	-0.0827654	Injury
M05644_2.00	raraa	-0.082748	Injury
M07912_2.00	ctcf	-0.0827398	Injury
M09284_2.00	roraa	-0.0827377	Injury
M05610_2.00	rarga	-0.0827149	Injury
M02242	ctcf	-0.0826527	Injury
M07864_2.00	ctcf	-0.0825989	Injury
M03193_2.00	lhx4	-0.0825959	Injury
M03403_2.00	rarga	-0.0825825	Injury
M04689	ctcf	-0.0825104	Injury
M03435_2.00	thrab	-0.0824919	Injury
M07885_2.00	ctcf	-0.08245	Injury
M05600_2.00	rarab	-0.0824496	Injury
M07896_2.00	ctcf	-0.0824493	Injury
M08966_2.00	ctcf	-0.0824399	Injury
M07883_2.00	ctcf	-0.0824086	Injury
M03181_2.00	vsx1	-0.0823987	Injury
M07280	raraa	-0.0823384	Injury
M04889	chd2	-0.0823371	Injury
M11192_2.00	rorab	-0.0823202	Injury
M05643_2.00	raraa	-0.0823144	Injury
M04559	sox11b	-0.0822501	Injury
M03385_2.00	rarga	-0.0822112	Injury
M03941_2.00	esr2a	-0.0821474	Injury
M04859_2.00	FOXK2	-0.0820745	Injury
M11180_2.00	rorab	-0.0820664	Injury
M02410_2.00	rorab	-0.0820444	Injury
M11192_2.00	rxraa	-0.0820231	Injury
M02416_2.00	raraa	-0.0819351	Injury
M07872_2.00	ctcf	-0.0819349	Injury
M10203	ctcf	-0.0819259	Injury
M05631_2.00	thrab	-0.0818696	Injury
M03660_2.00	creb1b	-0.0818461	Injury
M03434_2.00	rorab	-0.0818448	Injury
M05645_2.00	rxraa	-0.0818332	Injury
M06446_2.00	smad5	-0.0818331	Injury
M05665_2.00	rorab	-0.0818063	Injury
M03926_2.00	thrab	-0.0817599	Injury
M02402_2.00	roraa	-0.0816763	Injury
M06085_2.00	scrt1a	-0.081638	Injury
M02705_2.00	pparab	-0.0816029	Injury
M03867_2.00	vsx1	-0.0815793	Injury
M09368_2.00	rfx1a	-0.0815731	Injury
M09760	dpf2	-0.0815689	Injury
M02782_2.00	bhlhe40	-0.0815671	Injury
M07122	rfx1a	-0.081559	Injury
M02400_2.00	rarab	-0.0815483	Injury
M02709_2.00	rorab	-0.0815478	Injury
M00280_2.00	rx2	-0.0814829	Injury
M08222_2.00	rarab	-0.0814702	Injury
M05879_2.00	rorab	-0.0814637	Injury
M08217_2.00	roraa	-0.0814345	Injury
M02423_2.00	esrrga	-0.0813774	Injury
M00282_2.00	lhx4	-0.081377	Injury
M06321_2.00	lhx4	-0.081377	Injury
M06350_2.00	lhx4	-0.081377	Injury
M09562_2.00	lhx4	-0.081377	Injury
M05661_2.00	rorab	-0.0813733	Injury
M04418_2.00	klf12b	-0.0813326	Injury
M03928_2.00	nr2f1a	-0.0813264	Injury
M07990_2.00	rorca	-0.0813105	Injury
M05614_2.00	roraa	-0.0812864	Injury
M06526_2.00	six6b	-0.0812281	Injury
M03105_2.00	rx2	-0.0812236	Injury
M05634_2.00	nr1i2	-0.0811963	Injury
M08162_2.00	rfx1a	-0.0811604	Injury
M08221_2.00	rorcb	-0.0811149	Injury
M09194_2.00	vsx1	-0.081101	Injury
M05802_2.00	tbx3a	-0.0810687	Injury
M05641_2.00	rorab	-0.0810535	Injury
M10526_2.00	FOXK2	-0.0809752	Injury
M07910_2.00	ctcf	-0.0809635	Injury
M02405_2.00	roraa	-0.0809445	Injury
M07406	srebf2	-0.0808811	Injury
M03489_2.00	sox11b	-0.0808763	Injury
M05801_2.00	tbx3a	-0.0808662	Injury
M05623_2.00	rxrgb	-0.0808342	Injury
M09361_2.00	rfx1a	-0.0808282	Injury
M07895_2.00	ctcf	-0.0807666	Injury
M09362_2.00	rfx1a	-0.0807235	Injury
M07879_2.00	ctcf	-0.0806662	Injury
M09890	ctcf	-0.0806597	Injury
M04840_2.00	FOXK2	-0.0805852	Injury
M04222_2.00	srebf2	-0.080556	Injury
M03151_2.00	vsx1	-0.0805303	Injury
M07899_2.00	ctcf	-0.0805302	Injury
M05885_2.00	rorab	-0.0805184	Injury
M03048_2.00	foxp1b	-0.0805169	Injury
M00504_2.00	lhx4	-0.0805065	Injury
M03403_2.00	rorab	-0.0804847	Injury
M03502_2.00	sox11b	-0.0804443	Injury
M09089_2.00	foxp4	-0.0804273	Injury
M05663_2.00	rarga	-0.0803416	Injury
M04258_2.00	creb1b	-0.0803005	Injury
M05888_2.00	rfx1a	-0.0802769	Injury
M08869_2.00	ctcf	-0.0802579	Injury
M04420_2.00	klf7b	-0.08019	Injury
M09706	rfx1a	-0.0801439	Injury
M09429_2.00	tbx3a	-0.0801244	Injury
M10393	tbx3a	-0.0801244	Injury
M09363_2.00	rfx1a	-0.0801201	Injury
M09367_2.00	rfx1a	-0.0801201	Injury
M07893_2.00	ctcf	-0.0800594	Injury
M04797_2.00	erfl3	-0.0800511	Injury
M07904_2.00	ctcf	-0.0800498	Injury
M05801_2.00	tbx2a	-0.0800494	Injury
M06172_2.00	klf12a	-0.0800443	Injury
M06417_2.00	rorcb	-0.080029	Injury
M05664_2.00	roraa	-0.079906	Injury
M09271_2.00	rorcb	-0.0799052	Injury
M00226_2.00	klf12a	-0.0798759	Injury
M09291_2.00	roraa	-0.0798628	Injury
M00531_2.00	rx2	-0.0798253	Injury
M05254_2.00	rx2	-0.0798253	Injury
M00308_2.00	hmx4	-0.0798112	Injury
M05208_2.00	meis1b	-0.0798102	Injury
M05665_2.00	rarab	-0.0797856	Injury
M07900_2.00	ctcf	-0.0797322	Injury
M07918_2.00	ctcf	-0.0796751	Injury
M03108_2.00	vsx1	-0.079634	Injury
M03488_2.00	sox11b	-0.0796103	Injury
M04170	her15.1	-0.0795604	Injury
M05570_2.00	esr2a	-0.0795561	Injury
M08022_2.00	ctcf	-0.0794864	Injury
M07881_2.00	ctcf	-0.0794637	Injury
M05600_2.00	roraa	-0.0794416	Injury
M02112_2.00	vsx1	-0.0793962	Injury
M03077_2.00	vsx1	-0.0793875	Injury
M03421_2.00	rarab	-0.0793689	Injury
M03865_2.00	lhx4	-0.0793667	Injury
M05615_2.00	rarab	-0.0793661	Injury
M02750_2.00	rfx1a	-0.0792493	Injury
M02402_2.00	rarga	-0.0792321	Injury
M01013	pbx4	-0.0792159	Injury
M05368_2.00	isl2a	-0.0791977	Injury
M05583_2.00	raraa	-0.0791066	Injury
M04860_2.00	FOXK2	-0.0789792	Injury
M08726_2.00	bhlhe40	-0.0788709	Injury
M05597_2.00	raraa	-0.0788706	Injury
M02706_2.00	nr2f1a	-0.0788664	Injury
M11193_2.00	thrab	-0.078866	Injury
M04455_2.00	klf6a	-0.0788601	Injury
M11148_2.00	rorb	-0.0788456	Injury
M08158_2.00	raraa	-0.0787936	Injury
M08222_2.00	rarga	-0.0787848	Injury
M03048_2.00	foxj1a	-0.0786157	Injury
M07914_2.00	ctcf	-0.0785741	Injury
M01259	ctcf	-0.0785508	Injury
M05138_2.00	meis1b	-0.0785123	Injury
M05641_2.00	rarga	-0.0784791	Injury
M08965_2.00	klf6a	-0.0784161	Injury
M07280	rarga	-0.0784109	Injury
M05008_2.00	vsx1	-0.0783868	Injury
M05218_2.00	vsx1	-0.0783868	Injury
M03404_2.00	rorab	-0.0783691	Injury
M11090_2.00	nr2f1b	-0.078336	Injury
M03377_2.00	rarab	-0.0783333	Injury
M07874_2.00	ctcf	-0.0783127	Injury
M02410_2.00	rarab	-0.0782926	Injury
M02737_2.00	FOXK2	-0.0782421	Injury
M08059_2.00	srebf2	-0.0781793	Injury
M00056_2.00	rx1	-0.0781437	Injury
M06352_2.00	rx1	-0.0781437	Injury
M08427_2.00	smad3b	-0.0781239	Injury
M00317_2.00	vsx1	-0.0780887	Injury
M02399_2.00	rxraa	-0.0780816	Injury
M03183_2.00	vsx1	-0.0780756	Injury
M04860_2.00	foxp1b	-0.0780696	Injury
M02448_2.00	rfx1a	-0.0780571	Injury
M02078_2.00	vsx1	-0.0780298	Injury
M05644_2.00	rarab	-0.0780086	Injury
M09159_2.00	meis1b	-0.0779466	Injury
M08086_2.00	klf12b	-0.077942	Injury
M05616_2.00	roraa	-0.0779371	Injury
M01018_2.00	foxn3	-0.0779202	Injury
M03241_2.00	vsx1	-0.0778943	Injury
M07875_2.00	ctcf	-0.0778894	Injury
M04762_2.00	erf	-0.0778868	Injury
M01988_2.00	foxp4	-0.0778857	Injury
M05645_2.00	raraa	-0.0778775	Injury
M07919_2.00	ctcf	-0.077834	Injury
M05667_2.00	rxraa	-0.0778331	Injury
M09456_2.00	bhlhe40	-0.0778246	Injury
M09334_2.00	rarab	-0.0777848	Injury
M07925_2.00	ctcf	-0.0777566	Injury
M06231_2.00	vsx1	-0.0777536	Injury
M07889_2.00	ctcf	-0.0777221	Injury
M07894_2.00	ctcf	-0.0776865	Injury
M05068_2.00	lhx4	-0.0776375	Injury
M05682_2.00	roraa	-0.0776366	Injury
M03822_2.00	vsx1	-0.077635	Injury
M07249	ctcf	-0.0776242	Injury
M04317_2.00	creb3l2	-0.0776032	Injury
M08156_2.00	rarga	-0.0775721	Injury
M00288_2.00	vsx1	-0.0775536	Injury
M03124_2.00	vsx1	-0.0775536	Injury
M08015	vsx1	-0.0775536	Injury
M06417_2.00	rxraa	-0.0774827	Injury
M05671_2.00	thrab	-0.0774699	Injury
M07923_2.00	ctcf	-0.077451	Injury
M04487	roraa	-0.0774335	Injury
M09291_2.00	rarab	-0.0774141	Injury
M04318_2.00	creb3l2	-0.0774132	Injury
M09275_2.00	roraa	-0.0773993	Injury
M05590_2.00	rorcb	-0.0773567	Injury
M06538_2.00	lhx9	-0.0772852	Injury
M05617_2.00	raraa	-0.0772586	Injury
M02993_2.00	erf	-0.0772242	Injury
M00811_2.00	rxraa	-0.0772081	Injury
M05613_2.00	rorca	-0.0771851	Injury
M07878_2.00	ctcf	-0.0771785	Injury
M07903_2.00	ctcf	-0.0771774	Injury
M02407_2.00	rxraa	-0.0771704	Injury
M05669_2.00	rxraa	-0.0771704	Injury
M05670_2.00	rxraa	-0.0771704	Injury
M05139_2.00	meis1b	-0.0771354	Injury
M00810_2.00	rarab	-0.0770469	Injury
M05752_2.00	sox11a	-0.0770298	Injury
M06413_2.00	nr2f1a	-0.0769854	Injury
M06426_2.00	rarga	-0.0769771	Injury
M07891_2.00	ctcf	-0.0769543	Injury
M03372_2.00	rorab	-0.0769139	Injury
M01988_2.00	FOXK2	-0.0768473	Injury
M03776_2.00	vax2	-0.0768155	Injury
M03505_2.00	sox11b	-0.0768019	Injury
M00289_2.00	lhx4	-0.0767984	Injury
M03201_2.00	vsx1	-0.0767568	Injury
M05593_2.00	rxraa	-0.0766469	Injury
M03423_2.00	rarga	-0.0766433	Injury
M08086_2.00	klf6a	-0.0766185	Injury
M00308_2.00	lhx9	-0.0765966	Injury
M00796_2.00	foxp1b	-0.0765361	Injury
M05751_2.00	sox11a	-0.0765221	Injury
M04752_2.00	erfl3	-0.0764271	Injury
M03409_2.00	rxraa	-0.0763163	Injury
M07550_2.00	ctcf	-0.0762953	Injury
M05617_2.00	thrab	-0.0762566	Injury
M08217_2.00	raraa	-0.0762533	Injury
M03856_2.00	vsx1	-0.0762284	Injury
M05627_2.00	roraa	-0.076225	Injury
M03396_2.00	rarab	-0.0761775	Injury
M03926_2.00	rxraa	-0.0761717	Injury
M03181_2.00	lhx4	-0.0761436	Injury
M00279_2.00	rx2	-0.0761402	Injury
M07863_2.00	ctcf	-0.0761247	Injury
M09407_2.00	tcf7	-0.0760912	Injury
M00184_2.00	raraa	-0.0760577	Injury
M00822_2.00	raraa	-0.0760577	Injury
M02392_2.00	raraa	-0.0760577	Injury
M05605_2.00	raraa	-0.0760166	Injury
M07867_2.00	ctcf	-0.0759926	Injury
M06215_2.00	vax2	-0.0759594	Injury
M05882_2.00	rarab	-0.0759278	Injury
M09744	ctcf	-0.0758741	Injury
M00169_2.00	six6b	-0.0758387	Injury
M06195_2.00	FOXK2	-0.0758281	Injury
M06474_2.00	FOXK2	-0.0758281	Injury
M05555_2.00	mef2cb	-0.0757614	Injury
M08116_2.00	foxp4	-0.0756701	Injury
M07922_2.00	ctcf	-0.0756669	Injury
M04773_2.00	erf	-0.0756643	Injury
M03051_2.00	foxo3b	-0.0756027	Injury
M07877_2.00	ctcf	-0.0756001	Injury
M06164_2.00	klf12a	-0.0755766	Injury
M03118_2.00	vsx1	-0.0755666	Injury
M02986_2.00	elk3	-0.0755468	Injury
M00199_2.00	sox8a	-0.0755058	Injury
M02719_2.00	sox11b	-0.0755044	Injury
M09876	bhlhe40	-0.0755009	Injury
M02399_2.00	raraa	-0.0754986	Injury
M04825_2.00	FOXK2	-0.0754911	Injury
M03420_2.00	rarab	-0.0754686	Injury
M04995_2.00	vsx1	-0.0754519	Injury
M05213_2.00	vsx1	-0.0754519	Injury
M09320_2.00	rorca	-0.0753853	Injury
M02400_2.00	rorab	-0.0753161	Injury
M03929_2.00	rxrgb	-0.0752804	Injury
M05592_2.00	roraa	-0.075263	Injury
M04430_2.00	klf6a	-0.0752359	Injury
M08238_2.00	ctcf	-0.075191	Injury
M03981_2.00	sox11b	-0.0751354	Injury
M07898_2.00	ctcf	-0.075129	Injury
M05778_2.00	tcf7l1a	-0.0751087	Injury
M05671_2.00	raraa	-0.0751063	Injury
M04512_2.00	klf15	-0.0750837	Injury
M04133	tbx2a	-0.0750831	Injury
M00134_2.00	klf12a	-0.0750771	Injury
M09301_2.00	roraa	-0.0750429	Injury
M02166_2.00	vsx1	-0.0750263	Injury
M04904_2.00	vsx1	-0.0750263	Injury
M04962_2.00	vsx1	-0.0750263	Injury
M04963_2.00	vsx1	-0.0750263	Injury
M04965_2.00	vsx1	-0.0750263	Injury
M04966_2.00	vsx1	-0.0750263	Injury
M04986_2.00	vsx1	-0.0750263	Injury
M04992_2.00	vsx1	-0.0750263	Injury
M05037_2.00	vsx1	-0.0750263	Injury
M05087_2.00	vsx1	-0.0750263	Injury
M05089_2.00	vsx1	-0.0750263	Injury
M05101_2.00	vsx1	-0.0750263	Injury
M05103_2.00	vsx1	-0.0750263	Injury
M05126_2.00	vsx1	-0.0750263	Injury
M05128_2.00	vsx1	-0.0750263	Injury
M05144_2.00	vsx1	-0.0750263	Injury
M05146_2.00	vsx1	-0.0750263	Injury
M05161_2.00	vsx1	-0.0750263	Injury
M05163_2.00	vsx1	-0.0750263	Injury
M05244_2.00	vsx1	-0.0750263	Injury
M05281_2.00	vsx1	-0.0750263	Injury
M05282_2.00	vsx1	-0.0750263	Injury
M05292_2.00	vsx1	-0.0750263	Injury
M05293_2.00	vsx1	-0.0750263	Injury
M07865_2.00	ctcf	-0.074995	Injury
M07888_2.00	ctcf	-0.074948	Injury
M03409_2.00	rorab	-0.0748748	Injury
M07305	rfx1a	-0.0748628	Injury
M07924_2.00	ctcf	-0.0748377	Injury
M05380_2.00	rx2	-0.0748308	Injury
M03388_2.00	rorab	-0.0748203	Injury
M02451_2.00	rfx1a	-0.0747845	Injury
M00448_2.00	vsx1	-0.0747634	Injury
M03428_2.00	nr2e1	-0.0747534	Injury
M02466_2.00	samd11	-0.0747217	Injury
M04293_2.00	creb3l3b	-0.0747006	Injury
M03776_2.00	lhx9	-0.0747005	Injury
M00181_2.00	raraa	-0.0746953	Injury
M05644_2.00	thrab	-0.0746483	Injury
M03218_2.00	vsx1	-0.0746273	Injury
M04127_2.00	bhlhe40	-0.0745948	Injury
M02393_2.00	roraa	-0.0745906	Injury
M07876_2.00	ctcf	-0.0745372	Injury
M05318_2.00	meis1b	-0.0745014	Injury
M09297_2.00	raraa	-0.0744761	Injury
M09330_2.00	raraa	-0.0744761	Injury
M03384_2.00	rxraa	-0.0744542	Injury
M05610_2.00	rorab	-0.0744102	Injury
M03424_2.00	esr2a	-0.0744079	Injury
M08211_2.00	hmx4	-0.0743318	Injury
M07870_2.00	ctcf	-0.0743106	Injury
M08153_2.00	nr2f5	-0.0742785	Injury
M09110_2.00	foxp4	-0.0742091	Injury
M03251_2.00	lhx4	-0.0741919	Injury
M01977_2.00	FOXK2	-0.0741578	Injury
M03397_2.00	esr2a	-0.0741475	Injury
M03556_2.00	tbx2a	-0.074145	Injury
M07992_2.00	nr2f5	-0.0741284	Injury
M09612_2.00	rorab	-0.074128	Injury
M05683_2.00	thrab	-0.0741173	Injury
M05325_2.00	rx2	-0.0741112	Injury
M05430	rreb1b	-0.0740711	Injury
M08900	tbx3a	-0.0740495	Injury
M03286_2.00	lhx4	-0.0740384	Injury
M07985_2.00	nr2f5	-0.0740312	Injury
M07992_2.00	rorcb	-0.0740091	Injury
M05648_2.00	raraa	-0.0739451	Injury
M04419_2.00	klf12a	-0.0739328	Injury
M03659_2.00	creb1b	-0.0739164	Injury
M01022_2.00	gli2a	-0.0739155	Injury
M00820_2.00	ppardb	-0.0738587	Injury
M09952_2.00	creb1b	-0.0737991	Injury
M05032_2.00	meis1b	-0.0737892	Injury
M05556_2.00	mef2cb	-0.0737542	Injury
M00177	creb1b	-0.0737479	Injury
M04720	bhlhe40	-0.0737432	Injury
M05558	prdm5	-0.0737071	Injury
M05661_2.00	rarab	-0.0736941	Injury
M00403_2.00	lhx4	-0.0736184	Injury
M05589_2.00	rorb	-0.0735378	Injury
[truncated: 135,356 more rows]

## Sheet: tab2
TF	Motif	Peak	Target	TF_Motif_Cor	PtoG_Class	GG_Corr	Triple	type	TF_fold	Target_fold	Peak_fold
fosl2	M03870	chr18:18431613-18432113	aars1	0.542626	Inter	0.109151	fosl2->chr18:18431613-18432113->aars1	Act	2.31203	0.474865	2.90374
ascl1a	M08744_2.00	chr18:18431613-18432113	aars1	0.0621193	Inter	0.109531	ascl1a->chr18:18431613-18432113->aars1	Act	0.683363	0.474865	2.90374
sox8a	M03487_2.00	chr3:27841912-27842412	abat	0.0815095	Body	0.17012	sox8a->chr3:27841912-27842412->abat	Act	1.14831	0.757652	0
sox13	M03487_2.00	chr3:27841912-27842412	abat	0.137222	Body	0.148378	sox13->chr3:27841912-27842412->abat	Act	1.40426	0.757652	0
sox8a	M02912	chr3:27880078-27880578	abat	0.0695312	TSS	0.17012	sox8a->chr3:27880078-27880578->abat	Act	1.14831	0.757652	0
sox13	M00213_2.00	chr9:14272937-14273437	abcb6b	0.486407	Body	0.0549953	sox13->chr9:14272937-14273437->abcb6b	Act	1.40426	0.311901	0
sox13	M03977_2.00	chr9:14273767-14274267	abcb6b	0.228937	TSS	0.0549953	sox13->chr9:14273767-14274267->abcb6b	Act	1.40426	0.311901	0
runx1	M03465_2.00	chr14:10981446-10981946	abcb7	0.23762	TSS	0.0964509	runx1->chr14:10981446-10981946->abcb7	Act	1.51009	0.349902	0
tcf7l1a	M00805	chr14:10982048-10982548	abcb7	0.191918	TSS	0.0828745	tcf7l1a->chr14:10982048-10982548->abcb7	Act	0.749125	0.349902	0
mybl1	M02884	chr14:10982048-10982548	abcb7	0.211325	TSS	0.0971158	mybl1->chr14:10982048-10982548->abcb7	Act	1.69618	0.349902	0
fosl2	M08932	chr24:31331741-31332241	abcd3a	0.251979	TSS	0.0523189	fosl2->chr24:31331741-31332241->abcd3a	Act	2.31203	0.389805	0
e2f3	M02847	chr7:10911132-10911632	abhd17c	0.0527864	TSS	0.0940702	e2f3->chr7:10911132-10911632->abhd17c	Act	0.665166	0.30312	0
e2f3	M02847	chr7:10911741-10912241	abhd17c	0.0527864	TSS	0.0940702	e2f3->chr7:10911741-10912241->abhd17c	Act	0.665166	0.30312	0
tcf7l1a	M08901	chr5:72145364-72145864	abl1	0.0660347	Body	0.0843166	tcf7l1a->chr5:72145364-72145864->abl1	Act	0.749125	0.440051	0
tead1a	M08175_2.00	chr5:72152814-72153314	abl1	0.417358	Body	0.107397	tead1a->chr5:72152814-72153314->abl1	Act	1.61908	0.440051	2.27904
fosl2	M03870	chr5:72312242-72312742	abl1	0.542626	Inter	0.104783	fosl2->chr5:72312242-72312742->abl1	Act	2.31203	0.440051	4.94308
fosl2	M04335_2.00	chr5:72389023-72389523	abl1	0.179559	Inter	0.104783	fosl2->chr5:72389023-72389523->abl1	Act	2.31203	0.440051	0
fosl2	M08915	chr5:72152184-72152684	abl1	0.207604	TSS	0.104783	fosl2->chr5:72152184-72152684->abl1	Act	2.31203	0.440051	2.7415
mybl1	M11050_2.00	chr5:72152184-72152684	abl1	0.304592	TSS	0.0888961	mybl1->chr5:72152184-72152684->abl1	Act	1.69618	0.440051	2.7415
sox2	M11331_2.00	chr5:19336706-19337206	acacb	0.425179	Body	0.119332	sox2->chr5:19336706-19337206->acacb	Act	0.777717	0.328666	0
sox8a	M11331_2.00	chr5:19336706-19337206	acacb	0.448372	Body	0.118793	sox8a->chr5:19336706-19337206->acacb	Act	1.14831	0.328666	0
sox13	M11331_2.00	chr5:19336706-19337206	acacb	0.562935	Body	0.152709	sox13->chr5:19336706-19337206->acacb	Act	1.40426	0.328666	0
sox2	M09387_2.00	chr5:19574783-19575283	acacb	0.435986	Inter	0.119332	sox2->chr5:19574783-19575283->acacb	Act	0.777717	0.328666	1.55028
sox8a	M09387_2.00	chr5:19574783-19575283	acacb	0.489069	Inter	0.118793	sox8a->chr5:19574783-19575283->acacb	Act	1.14831	0.328666	1.55028
sox13	M09387_2.00	chr5:19574783-19575283	acacb	0.596314	Inter	0.152709	sox13->chr5:19574783-19575283->acacb	Act	1.40426	0.328666	1.55028
sox8a	M09641_2.00	chr24:11456850-11457350	acad11	0.42154	Inter	0.157998	sox8a->chr24:11456850-11457350->acad11	Act	1.14831	0.488587	0
sox2	M09641_2.00	chr24:11456850-11457350	acad11	0.434467	Inter	0.178266	sox2->chr24:11456850-11457350->acad11	Act	0.777717	0.488587	0
sox13	M09641_2.00	chr24:11456850-11457350	acad11	0.560156	Inter	0.219676	sox13->chr24:11456850-11457350->acad11	Act	1.40426	0.488587	0
sox2	M02246	chr7:20297572-20298072	acadvl	0.217687	TSS	0.0751711	sox2->chr7:20297572-20298072->acadvl	Act	0.777717	0.318445	3.25825
sox2	M02246	chr7:20298086-20298586	acadvl	0.217687	TSS	0.0751711	sox2->chr7:20298086-20298586->acadvl	Act	0.777717	0.318445	2.142
zic2b	M00137_2.00	chr7:20298086-20298586	acadvl	0.187975	TSS	0.0639336	zic2b->chr7:20298086-20298586->acadvl	Act	1.25359	0.318445	2.142
zic2b	M00137_2.00	chr7:20298587-20299087	acadvl	0.187975	TSS	0.0639336	zic2b->chr7:20298587-20299087->acadvl	Act	1.25359	0.318445	0.844687
sox8a	M01014	chr7:20100114-20100614	acap1	0.328759	Body	0.207751	sox8a->chr7:20100114-20100614->acap1	Act	1.14831	0.595078	2.96384
sox13	M01014	chr7:20100114-20100614	acap1	0.447704	Body	0.233399	sox13->chr7:20100114-20100614->acap1	Act	1.40426	0.595078	2.96384
rarga	M02705_2.00	chr7:20100114-20100614	acap1	0.12428	Body	0.182368	rarga->chr7:20100114-20100614->acap1	Act	0.588239	0.595078	2.96384
sox8a	M03508_2.00	chr7:20103161-20103661	acap1	0.25075	Body	0.207751	sox8a->chr7:20103161-20103661->acap1	Act	1.14831	0.595078	0
sox13	M03508_2.00	chr7:20103161-20103661	acap1	0.325577	Body	0.233399	sox13->chr7:20103161-20103661->acap1	Act	1.40426	0.595078	0
sox8a	M03508_2.00	chr7:20113479-20113979	acap1	0.25075	Body	0.207751	sox8a->chr7:20113479-20113979->acap1	Act	1.14831	0.595078	4.33317
sox13	M03508_2.00	chr7:20113479-20113979	acap1	0.325577	Body	0.233399	sox13->chr7:20113479-20113979->acap1	Act	1.40426	0.595078	4.33317
rarga	M09313_2.00	chr7:20113479-20113979	acap1	0.344843	Body	0.182368	rarga->chr7:20113479-20113979->acap1	Act	0.588239	0.595078	4.33317
rarga	M03394_2.00	chr7:19978845-19979345	acap1	0.0508909	Inter	0.182368	rarga->chr7:19978845-19979345->acap1	Act	0.588239	0.595078	0
rarga	M09276_2.00	chr7:20177879-20178379	acap1	0.337735	Inter	0.182368	rarga->chr7:20177879-20178379->acap1	Act	0.588239	0.595078	0
rarga	M07994_2.00	chr7:20299449-20299949	acap1	0.0513925	Inter	0.182368	rarga->chr7:20299449-20299949->acap1	Act	0.588239	0.595078	2.05427
stat3	M01220	chr22:37770877-37771377	acap2	0.281591	Body	0.116761	stat3->chr22:37770877-37771377->acap2	Act	1.70202	0.573942	0
rx1	M03823_2.00	chr22:37775324-37775824	acap2	0.185123	Body	0.064822	rx1->chr22:37775324-37775824->acap2	Act	0.850525	0.573942	0
nfixa	M03968_2.00	chr22:37785023-37785523	acap2	0.274565	Body	0.0796118	nfixa->chr22:37785023-37785523->acap2	Act	2.03913	0.573942	5.30777
nfic	M03968_2.00	chr22:37785023-37785523	acap2	0.406553	Body	0.0885941	nfic->chr22:37785023-37785523->acap2	Act	2.75632	0.573942	5.30777
rx1	M06325_2.00	chr22:37785023-37785523	acap2	0.0579416	Body	0.064822	rx1->chr22:37785023-37785523->acap2	Act	0.850525	0.573942	5.30777
foxj3	M04274	chr22:37796888-37797388	acap2	0.0564284	Body	0.0650077	foxj3->chr22:37796888-37797388->acap2	Act	0.808686	0.573942	0
rx1	M00393_2.00	chr22:37796888-37797388	acap2	0.118879	Body	0.064822	rx1->chr22:37796888-37797388->acap2	Act	0.850525	0.573942	0
rarga	M05606_2.00	chr22:37796888-37797388	acap2	0.0624392	Body	0.091434	rarga->chr22:37796888-37797388->acap2	Act	0.588239	0.573942	0
sox13	M01026_2.00	chr22:37495507-37496007	acap2	0.499614	Inter	0.107913	sox13->chr22:37495507-37496007->acap2	Act	1.40426	0.573942	5.1507
rx1	M06230_2.00	chr22:37495507-37496007	acap2	0.0996045	Inter	0.064822	rx1->chr22:37495507-37496007->acap2	Act	0.850525	0.573942	5.1507
rarga	M09282_2.00	chr22:37495507-37496007	acap2	0.338476	Inter	0.091434	rarga->chr22:37495507-37496007->acap2	Act	0.588239	0.573942	5.1507
rarga	M11183_2.00	chr22:37575250-37575750	acap2	0.121386	Inter	0.091434	rarga->chr22:37575250-37575750->acap2	Act	0.588239	0.573942	0
rx1	M03186_2.00	chr22:37623295-37623795	acap2	0.200924	Inter	0.064822	rx1->chr22:37623295-37623795->acap2	Act	0.850525	0.573942	0
sox13	M03973_2.00	chr22:37623295-37623795	acap2	0.3116	Inter	0.107913	sox13->chr22:37623295-37623795->acap2	Act	1.40426	0.573942	0
sox13	M00205_2.00	chr22:37799637-37800137	acap2	0.377959	Inter	0.107913	sox13->chr22:37799637-37800137->acap2	Act	1.40426	0.573942	0
rx1	M06325_2.00	chr22:37799637-37800137	acap2	0.0579416	Inter	0.064822	rx1->chr22:37799637-37800137->acap2	Act	0.850525	0.573942	0
foxj3	M09114_2.00	chr22:37799637-37800137	acap2	0.0866818	Inter	0.0650077	foxj3->chr22:37799637-37800137->acap2	Act	0.808686	0.573942	0
rarga	M09294_2.00	chr22:37799637-37800137	acap2	0.243923	Inter	0.091434	rarga->chr22:37799637-37800137->acap2	Act	0.588239	0.573942	0
foxj3	M04274	chr22:37797406-37797906	acap2	0.0564284	TSS	0.0650077	foxj3->chr22:37797406-37797906->acap2	Act	0.808686	0.573942	0
rx1	M00393_2.00	chr22:37797406-37797906	acap2	0.118879	TSS	0.064822	rx1->chr22:37797406-37797906->acap2	Act	0.850525	0.573942	0
rarga	M05606_2.00	chr22:37797406-37797906	acap2	0.0624392	TSS	0.091434	rarga->chr22:37797406-37797906->acap2	Act	0.588239	0.573942	0
sox2	M07225	chr12:14037421-14037921	aclyb	0.414659	Body	0.0754033	sox2->chr12:14037421-14037921->aclyb	Act	0.777717	0.444971	0
sox13	M01026_2.00	chr12:14037421-14037921	aclyb	0.499614	Body	0.0879201	sox13->chr12:14037421-14037921->aclyb	Act	1.40426	0.444971	0
fosl2	M00924	chr8:46668341-46668841	acot7	0.534263	Inter	0.140678	fosl2->chr8:46668341-46668841->acot7	Act	2.31203	0.563157	4.85484
tead1a	M04141	chr8:46668341-46668841	acot7	0.373323	Inter	0.11428	tead1a->chr8:46668341-46668841->acot7	Act	1.61908	0.563157	4.85484
tead3b	M04144	chr8:46668341-46668841	acot7	0.238696	Inter	0.114373	tead3b->chr8:46668341-46668841->acot7	Act	0.518253	0.563157	4.85484
tcf7l1a	M00805	chr8:46895820-46896320	acot7	0.191918	Inter	0.127373	tcf7l1a->chr8:46895820-46896320->acot7	Act	0.749125	0.563157	2.5268
zic2b	M02940	chr8:46895820-46896320	acot7	0.166024	Inter	0.150427	zic2b->chr8:46895820-46896320->acot7	Act	1.25359	0.563157	2.5268
e2f3	M03962	chr8:46895820-46896320	acot7	0.118819	Inter	0.101763	e2f3->chr8:46895820-46896320->acot7	Act	0.665166	0.563157	2.5268
e2f3	M06870_2.00	chr8:46920005-46920505	acot7	0.0518297	Inter	0.101763	e2f3->chr8:46920005-46920505->acot7	Act	0.665166	0.563157	0
e2f3	M06870_2.00	chr8:46920555-46921055	acot7	0.0518297	Inter	0.101763	e2f3->chr8:46920555-46921055->acot7	Act	0.665166	0.563157	2.53839
fosl2	M04273_2.00	chr8:47143296-47143796	acot7	0.247272	Inter	0.140678	fosl2->chr8:47143296-47143796->acot7	Act	2.31203	0.563157	2.02813
e2f3	M02847	chr8:46893779-46894279	acot7	0.0527864	TSS	0.101763	e2f3->chr8:46893779-46894279->acot7	Act	0.665166	0.563157	0
fosl2	M08941	chr8:46893779-46894279	acot7	0.260036	TSS	0.140678	fosl2->chr8:46893779-46894279->acot7	Act	2.31203	0.563157	0
esr2a	M09604_2.00	chr8:46893779-46894279	acot7	0.0823319	TSS	0.121266	esr2a->chr8:46893779-46894279->acot7	Act	1.11001	0.563157	0
fosl2	M04036_2.00	chr13:47432177-47432677	acoxl	0.26723	Body	0.11666	fosl2->chr13:47432177-47432677->acoxl	Act	2.31203	0.495484	3.43437
gli2a	M02641_2.00	chr13:47434615-47435115	acoxl	0.0629451	Body	0.134633	gli2a->chr13:47434615-47435115->acoxl	Act	2.41799	0.495484	3.10688
sox2	M00197_2.00	chr13:47414029-47414529	acoxl	0.312264	Inter	0.0976478	sox2->chr13:47414029-47414529->acoxl	Act	0.777717	0.495484	0
erfl3	M04717_2.00	chr13:47414029-47414529	acoxl	0.0699981	Inter	0.101318	erfl3->chr13:47414029-47414529->acoxl	Act	1.01761	0.495484	0
fosl2	M07092	chr13:47667631-47668131	acoxl	0.54754	Inter	0.11666	fosl2->chr13:47667631-47668131->acoxl	Act	2.31203	0.495484	2.91076
erfl3	M04709_2.00	chr13:47667631-47668131	acoxl	0.198175	Inter	0.101318	erfl3->chr13:47667631-47668131->acoxl	Act	1.01761	0.495484	2.91076
erfl3	M01494_2.00	chr13:47556195-47556695	acoxl	0.110543	TSS	0.101318	erfl3->chr13:47556195-47556695->acoxl	Act	1.01761	0.495484	0
myb	M03349_2.00	chr13:47556195-47556695	acoxl	0.0531216	TSS	0.0955465	myb->chr13:47556195-47556695->acoxl	Act	1.14685	0.495484	0
sox2	M03971_2.00	chr13:47556195-47556695	acoxl	0.175627	TSS	0.0976478	sox2->chr13:47556195-47556695->acoxl	Act	0.777717	0.495484	0
fosl2	M04328_2.00	chr13:47556195-47556695	acoxl	0.266536	TSS	0.11666	fosl2->chr13:47556195-47556695->acoxl	Act	2.31203	0.495484	0
gli2a	M05331	chr8:50863171-50863671	acsl2	0.0593127	Body	0.59612	gli2a->chr8:50863171-50863671->acsl2	Act	2.41799	0.721568	0
rarga	M02706_2.00	chr8:50863171-50863671	acsl2	0.255194	Body	0.37263	rarga->chr8:50863171-50863671->acsl2	Act	0.588239	0.721568	0
sox8a	M03513_2.00	chr8:50863171-50863671	acsl2	0.137653	Body	0.481256	sox8a->chr8:50863171-50863671->acsl2	Act	1.14831	0.721568	0
sox13	M03513_2.00	chr8:50863171-50863671	acsl2	0.186252	Body	0.510311	sox13->chr8:50863171-50863671->acsl2	Act	1.40426	0.721568	0
gli2a	M05331	chr8:50873331-50873831	acsl2	0.0593127	Body	0.59612	gli2a->chr8:50873331-50873831->acsl2	Act	2.41799	0.721568	2.53685
sox8a	M02719_2.00	chr8:50873331-50873831	acsl2	0.403529	Body	0.481256	sox8a->chr8:50873331-50873831->acsl2	Act	1.14831	0.721568	2.53685
sox13	M02719_2.00	chr8:50873331-50873831	acsl2	0.532837	Body	0.510311	sox13->chr8:50873331-50873831->acsl2	Act	1.40426	0.721568	2.53685
sox8a	M05751_2.00	chr8:50875716-50876216	acsl2	0.499782	Body	0.481256	sox8a->chr8:50875716-50876216->acsl2	Act	1.14831	0.721568	0
sox13	M05751_2.00	chr8:50875716-50876216	acsl2	0.592029	Body	0.510311	sox13->chr8:50875716-50876216->acsl2	Act	1.40426	0.721568	0
rarga	M09276_2.00	chr8:50875716-50876216	acsl2	0.337735	Body	0.37263	rarga->chr8:50875716-50876216->acsl2	Act	0.588239	0.721568	0
sox13	M03534_2.00	chr8:50878026-50878526	acsl2	0.0881191	Body	0.510311	sox13->chr8:50878026-50878526->acsl2	Act	1.40426	0.721568	1.97745
rarga	M07994_2.00	chr8:50878026-50878526	acsl2	0.0513925	Body	0.37263	rarga->chr8:50878026-50878526->acsl2	Act	0.588239	0.721568	1.97745
rarga	M02706_2.00	chr8:50888291-50888791	acsl2	0.255194	Body	0.37263	rarga->chr8:50888291-50888791->acsl2	Act	0.588239	0.721568	0
tead1a	M03576_2.00	chr8:50668069-50668569	acsl2	0.401935	Inter	0.289584	tead1a->chr8:50668069-50668569->acsl2	Act	1.61908	0.721568	0
nfic	M03476_2.00	chr8:50682221-50682721	acsl2	0.287847	Inter	0.36757	nfic->chr8:50682221-50682721->acsl2	Act	2.75632	0.721568	4.07595
rarga	M09263_2.00	chr8:50682221-50682721	acsl2	0.0797224	Inter	0.37263	rarga->chr8:50682221-50682721->acsl2	Act	0.588239	0.721568	4.07595
nfic	M09381_2.00	chr8:50725695-50726195	acsl2	0.380148	Inter	0.36757	nfic->chr8:50725695-50726195->acsl2	Act	2.75632	0.721568	0
stat3	M01220	chr8:50737889-50738389	acsl2	0.281591	Inter	0.409367	stat3->chr8:50737889-50738389->acsl2	Act	1.70202	0.721568	7.85212
sox8a	M00205_2.00	chr8:50737889-50738389	acsl2	0.269599	Inter	0.481256	sox8a->chr8:50737889-50738389->acsl2	Act	1.14831	0.721568	7.85212
sox13	M00205_2.00	chr8:50737889-50738389	acsl2	0.377959	Inter	0.510311	sox13->chr8:50737889-50738389->acsl2	Act	1.40426	0.721568	7.85212
rarga	M02706_2.00	chr8:50737889-50738389	acsl2	0.255194	Inter	0.37263	rarga->chr8:50737889-50738389->acsl2	Act	0.588239	0.721568	7.85212
nfic	M03475_2.00	chr8:50737889-50738389	acsl2	0.409764	Inter	0.36757	nfic->chr8:50737889-50738389->acsl2	Act	2.75632	0.721568	7.85212
tead1a	M04141	chr5:23575860-23576360	acsl4b	0.373323	Body	0.180837	tead1a->chr5:23575860-23576360->acsl4b	Act	1.61908	0.779277	0
rarga	M03562	chr5:23700250-23700750	acsl4b	0.0655841	Inter	0.282004	rarga->chr5:23700250-23700750->acsl4b	Act	0.588239	0.779277	0
nfixa	M02050	chr5:23573727-23574227	acsl4b	0.288932	TSS	0.228117	nfixa->chr5:23573727-23574227->acsl4b	Act	2.03913	0.779277	1.42588
stat3	M07065	chr5:23573727-23574227	acsl4b	0.335993	TSS	0.255189	stat3->chr5:23573727-23574227->acsl4b	Act	1.70202	0.779277	1.42588
rarga	M08152_2.00	chr5:23573727-23574227	acsl4b	0.20127	TSS	0.282004	rarga->chr5:23573727-23574227->acsl4b	Act	0.588239	0.779277	1.42588
tead1a	M09434_2.00	chr5:23573727-23574227	acsl4b	0.358917	TSS	0.180837	tead1a->chr5:23573727-23574227->acsl4b	Act	1.61908	0.779277	1.42588
crema	M08803	chr17:25833563-25834063	acss1	0.0816917	Body	0.105841	crema->chr17:25833563-25834063->acss1	Act	0.510229	0.537825	0
rarga	M05623_2.00	chr17:25833563-25834063	acss1	0.0510327	Body	0.182959	rarga->chr17:25833563-25834063->acss1	Act	0.588239	0.537825	0
stat3	M01220	chr17:25635534-25636034	acss1	0.281591	Inter	0.178435	stat3->chr17:25635534-25636034->acss1	Act	1.70202	0.537825	3.76706
gli2a	M03902	chr17:25847002-25847502	acss1	0.260418	TSS	0.201014	gli2a->chr17:25847002-25847502->acss1	Act	2.41799	0.537825	1.55214
sox13	M01014	chr4:21866862-21867362	acss3	0.447704	Body	0.232453	sox13->chr4:21866862-21867362->acss3	Act	1.40426	0.571773	3.23949
dmrt1	M10207	chr4:21866862-21867362	acss3	0.103717	Body	0.13038	dmrt1->chr4:21866862-21867362->acss3	Act	0.736507	0.571773	3.23949
nfic	M09381_2.00	chr4:21866862-21867362	acss3	0.380148	Body	0.182397	nfic->chr4:21866862-21867362->acss3	Act	2.75632	0.571773	3.23949
nfic	M09815	chr4:21867671-21868171	acss3	0.368835	Body	0.182397	nfic->chr4:21867671-21868171->acss3	Act	2.75632	0.571773	1.51848
sox13	M03492_2.00	chr4:21867671-21868171	acss3	0.210753	Body	0.232453	sox13->chr4:21867671-21868171->acss3	Act	1.40426	0.571773	1.51848
stat3	M09714	chr4:21671961-21672461	acss3	0.305177	Inter	0.189733	stat3->chr4:21671961-21672461->acss3	Act	1.70202	0.571773	4.02853
sox13	M03483_2.00	chr4:21671961-21672461	acss3	0.121407	Inter	0.232453	sox13->chr4:21671961-21672461->acss3	Act	1.40426	0.571773	4.02853
sox13	M03515_2.00	chr4:21748085-21748585	acss3	0.103009	Inter	0.232453	sox13->chr4:21748085-21748585->acss3	Act	1.40426	0.571773	0
sox13	M00201_2.00	chr15:43399513-43400013	actn4	0.287812	Body	0.311993	sox13->chr15:43399513-43400013->actn4	Act	1.40426	0.548605	0
tcf7l1a	M00805	chr15:43169943-43170443	actn4	0.191918	Inter	0.22532	tcf7l1a->chr15:43169943-43170443->actn4	Act	0.749125	0.548605	0
sox13	M09387_2.00	chr15:43169943-43170443	actn4	0.596314	Inter	0.311993	sox13->chr15:43169943-43170443->actn4	Act	1.40426	0.548605	0
erfl3	M00157_2.00	chr15:43252817-43253317	actn4	0.0643942	Inter	0.258427	erfl3->chr15:43252817-43253317->actn4	Act	1.01761	0.548605	0
erfl3	M07947_2.00	chr15:43385906-43386406	actn4	0.058945	Inter	0.258427	erfl3->chr15:43385906-43386406->actn4	Act	1.01761	0.548605	2.54336
sox13	M05769_2.00	chr15:43632515-43633015	actn4	0.315793	Inter	0.311993	sox13->chr15:43632515-43633015->actn4	Act	1.40426	0.548605	5.39349
sox13	M03486_2.00	chr15:43397373-43397873	actn4	0.0628481	TSS	0.311993	sox13->chr15:43397373-43397873->actn4	Act	1.40426	0.548605	0
mybl1	M05608	chr15:43398012-43398512	actn4	0.0584619	TSS	0.239575	mybl1->chr15:43398012-43398512->actn4	Act	1.69618	0.548605	0
sox13	M03486_2.00	chr15:43398012-43398512	actn4	0.0628481	TSS	0.311993	sox13->chr15:43398012-43398512->actn4	Act	1.40426	0.548605	0
erfl3	M09055_2.00	chr15:43398012-43398512	actn4	0.35224	TSS	0.258427	erfl3->chr15:43398012-43398512->actn4	Act	1.01761	0.548605	0
nfic	M09385_2.00	chr15:43398012-43398512	actn4	0.403628	TSS	0.293669	nfic->chr15:43398012-43398512->actn4	Act	2.75632	0.548605	0
tcf7l1a	M00805	chr15:43398852-43399352	actn4	0.191918	TSS	0.22532	tcf7l1a->chr15:43398852-43399352->actn4	Act	0.749125	0.548605	0
sox13	M03488_2.00	chr15:43398852-43399352	actn4	0.240095	TSS	0.311993	sox13->chr15:43398852-43399352->actn4	Act	1.40426	0.548605	0
stat3	M10081	chr12:45079953-45080453	ADAM12	0.346198	Body	0.300703	stat3->chr12:45079953-45080453->ADAM12	Act	1.70202	1.33129	3.52816
sox8a	M03526_2.00	chr12:45079953-45080453	ADAM12	0.150677	Body	0.37169	sox8a->chr12:45079953-45080453->ADAM12	Act	1.14831	1.33129	3.52816
sox13	M03526_2.00	chr12:45079953-45080453	ADAM12	0.174173	Body	0.340816	sox13->chr12:45079953-45080453->ADAM12	Act	1.40426	1.33129	3.52816
sox13	M09787	chr12:44820991-44821491	ADAM12	0.552681	Inter	0.340816	sox13->chr12:44820991-44821491->ADAM12	Act	1.40426	1.33129	0
sox8a	M00829_2.00	chr12:44820991-44821491	ADAM12	0.0785881	Inter	0.37169	sox8a->chr12:44820991-44821491->ADAM12	Act	1.14831	1.33129	0
sox8a	M11340_2.00	chr12:44821612-44822112	ADAM12	0.33546	Inter	0.37169	sox8a->chr12:44821612-44822112->ADAM12	Act	1.14831	1.33129	0
sox13	M11340_2.00	chr12:44821612-44822112	ADAM12	0.448127	Inter	0.340816	sox13->chr12:44821612-44822112->ADAM12	Act	1.40426	1.33129	0
sox8a	M08041_2.00	chr12:44879355-44879855	ADAM12	0.280954	Inter	0.37169	sox8a->chr12:44879355-44879855->ADAM12	Act	1.14831	1.33129	0
sox13	M08041_2.00	chr12:44879355-44879855	ADAM12	0.372203	Inter	0.340816	sox13->chr12:44879355-44879855->ADAM12	Act	1.40426	1.33129	0
sox13	M03504_2.00	chr12:44898855-44899355	ADAM12	0.0542881	Inter	0.340816	sox13->chr12:44898855-44899355->ADAM12	Act	1.40426	1.33129	1.97321
sox8a	M03545_2.00	chr12:44898855-44899355	ADAM12	0.145131	Inter	0.37169	sox8a->chr12:44898855-44899355->ADAM12	Act	1.14831	1.33129	1.97321
sox8a	M11340_2.00	chr12:44919419-44919919	ADAM12	0.33546	Inter	0.37169	sox8a->chr12:44919419-44919919->ADAM12	Act	1.14831	1.33129	0
sox13	M11340_2.00	chr12:44919419-44919919	ADAM12	0.448127	Inter	0.340816	sox13->chr12:44919419-44919919->ADAM12	Act	1.40426	1.33129	0
sox8a	M11331_2.00	chr12:44957098-44957598	ADAM12	0.448372	Inter	0.37169	sox8a->chr12:44957098-44957598->ADAM12	Act	1.14831	1.33129	0
sox13	M11331_2.00	chr12:44957098-44957598	ADAM12	0.562935	Inter	0.340816	sox13->chr12:44957098-44957598->ADAM12	Act	1.40426	1.33129	0
sox8a	M01026_2.00	chr12:45163927-45164427	ADAM12	0.365741	Inter	0.37169	sox8a->chr12:45163927-45164427->ADAM12	Act	1.14831	1.33129	0
sox13	M01026_2.00	chr12:45163927-45164427	ADAM12	0.499614	Inter	0.340816	sox13->chr12:45163927-45164427->ADAM12	Act	1.40426	1.33129	0
gli3	M01704	chr17:35039926-35040426	adam17a	0.068013	Inter	0.130738	gli3->chr17:35039926-35040426->adam17a	Act	0.96568	0.526935	4.2955
zic2b	M07292	chr17:35039926-35040426	adam17a	0.187455	Inter	0.130068	zic2b->chr17:35039926-35040426->adam17a	Act	1.25359	0.526935	4.2955
erfl3	M09063_2.00	chr17:35039926-35040426	adam17a	0.347194	Inter	0.125091	erfl3->chr17:35039926-35040426->adam17a	Act	1.01761	0.526935	4.2955
sox13	M09397_2.00	chr17:35039926-35040426	adam17a	0.572946	Inter	0.127216	sox13->chr17:35039926-35040426->adam17a	Act	1.40426	0.526935	4.2955
zic2b	M02940	chr17:35424212-35424712	adam17a	0.166024	Inter	0.130068	zic2b->chr17:35424212-35424712->adam17a	Act	1.25359	0.526935	5.98146
tcf7l1a	M00805	chr17:35451349-35451849	adam17a	0.191918	Inter	0.132261	tcf7l1a->chr17:35451349-35451849->adam17a	Act	0.749125	0.526935	2.02175
zic2b	M02940	chr17:35451349-35451849	adam17a	0.166024	Inter	0.130068	zic2b->chr17:35451349-35451849->adam17a	Act	1.25359	0.526935	2.02175
fosl2	M04036_2.00	chr17:35451349-35451849	adam17a	0.26723	Inter	0.148298	fosl2->chr17:35451349-35451849->adam17a	Act	2.31203	0.526935	2.02175
sox13	M11340_2.00	chr17:35468022-35468522	adam17a	0.448127	Inter	0.127216	sox13->chr17:35468022-35468522->adam17a	Act	1.40426	0.526935	1.93559
fosl2	M08915	chr17:35511772-35512272	adam17a	0.207604	Inter	0.148298	fosl2->chr17:35511772-35512272->adam17a	Act	2.31203	0.526935	4.5799
zic2b	M02894_2.00	chr17:35511772-35512272	adam17a	0.175498	Inter	0.130068	zic2b->chr17:35511772-35512272->adam17a	Act	1.25359	0.526935	4.5799
tead1a	M06455_2.00	chr17:35511772-35512272	adam17a	0.0660997	Inter	0.155969	tead1a->chr17:35511772-35512272->adam17a	Act	1.61908	0.526935	4.5799
erfl3	M02966_2.00	chr17:35278275-35278775	adam17a	0.0734224	TSS	0.125091	erfl3->chr17:35278275-35278775->adam17a	Act	1.01761	0.526935	0
tcf7l1b	M05755_2.00	chr7:61243112-61243612	adam19a	0.161238	Inter	0.158409	tcf7l1b->chr7:61243112-61243612->adam19a	Act	0.336061	0.416418	0
zic2b	M00137_2.00	chr7:61264069-61264569	adam19a	0.187975	Inter	0.11873	zic2b->chr7:61264069-61264569->adam19a	Act	1.25359	0.416418	4.38652
fosl2	M00924	chr7:61302642-61303142	adam19a	0.534263	Inter	0.13537	fosl2->chr7:61302642-61303142->adam19a	Act	2.31203	0.416418	2.22424
fosl2	M08915	chr7:61686447-61686947	adam19a	0.207604	Inter	0.13537	fosl2->chr7:61686447-61686947->adam19a	Act	2.31203	0.416418	2.05547
nfixa	M04058	chr8:20208729-20209229	adamts10	0.287683	Inter	0.164964	nfixa->chr8:20208729-20209229->adamts10	Act	2.03913	0.781047	3.78276
nfic	M03475_2.00	chr8:20208729-20209229	adamts10	0.409764	Inter	0.141352	nfic->chr8:20208729-20209229->adamts10	Act	2.75632	0.781047	3.78276
sox8a	M05893_2.00	chr8:20208729-20209229	adamts10	0.336224	Inter	0.30373	sox8a->chr8:20208729-20209229->adamts10	Act	1.14831	0.781047	3.78276
sox13	M05893_2.00	chr8:20208729-20209229	adamts10	0.472172	Inter	0.185396	sox13->chr8:20208729-20209229->adamts10	Act	1.40426	0.781047	3.78276
sox8a	M03540_2.00	chr8:20224246-20224746	adamts10	0.070712	Inter	0.30373	sox8a->chr8:20224246-20224746->adamts10	Act	1.14831	0.781047	2.4526
sox13	M03540_2.00	chr8:20224246-20224746	adamts10	0.114334	Inter	0.185396	sox13->chr8:20224246-20224746->adamts10	Act	1.40426	0.781047	2.4526
nfixa	M09378_2.00	chr8:20224246-20224746	adamts10	0.302806	Inter	0.164964	nfixa->chr8:20224246-20224746->adamts10	Act	2.03913	0.781047	2.4526
nfic	M09378_2.00	chr8:20224246-20224746	adamts10	0.427033	Inter	0.141352	nfic->chr8:20224246-20224746->adamts10	Act	2.75632	0.781047	2.4526
tead1a	M09435_2.00	chr8:20224246-20224746	adamts10	0.312626	Inter	0.0395896	tead1a->chr8:20224246-20224746->adamts10	Act	1.61908	0.781047	2.4526
sox8a	M03522_2.00	chr8:20224978-20225478	adamts10	0.228176	Inter	0.30373	sox8a->chr8:20224978-20225478->adamts10	Act	1.14831	0.781047	2.18875
sox13	M03522_2.00	chr8:20224978-20225478	adamts10	0.271872	Inter	0.185396	sox13->chr8:20224978-20225478->adamts10	Act	1.40426	0.781047	2.18875
sox8a	M00203_2.00	chr8:20391249-20391749	adamts10	0.294131	Inter	0.30373	sox8a->chr8:20391249-20391749->adamts10	Act	1.14831	0.781047	0
sox13	M00203_2.00	chr8:20391249-20391749	adamts10	0.391172	Inter	0.185396	sox13->chr8:20391249-20391749->adamts10	Act	1.40426	0.781047	0
sox8a	M04546	chr8:20408067-20408567	adamts10	0.229255	Inter	0.30373	sox8a->chr8:20408067-20408567->adamts10	Act	1.14831	0.781047	0
hlfa	M10258	chr8:20408067-20408567	adamts10	0.281346	Inter	0.176255	hlfa->chr8:20408067-20408567->adamts10	Act	0.589804	0.781047	0
sox13	M02718_2.00	chr8:20408067-20408567	adamts10	0.382777	Inter	0.185396	sox13->chr8:20408067-20408567->adamts10	Act	1.40426	0.781047	0
sox8a	M03541_2.00	chr8:20531316-20531816	adamts10	0.20579	Inter	0.30373	sox8a->chr8:20531316-20531816->adamts10	Act	1.14831	0.781047	0
sox13	M03541_2.00	chr8:20531316-20531816	adamts10	0.235834	Inter	0.185396	sox13->chr8:20531316-20531816->adamts10	Act	1.40426	0.781047	0
sox2	M05759_2.00	chr5:8910285-8910785	adamts12	0.340395	Body	0.148593	sox2->chr5:8910285-8910785->adamts12	Act	0.777717	0.408726	2.0463
sox8a	M05759_2.00	chr5:8910285-8910785	adamts12	0.383271	Body	0.121716	sox8a->chr5:8910285-8910785->adamts12	Act	1.14831	0.408726	2.0463
sox13	M05759_2.00	chr5:8910285-8910785	adamts12	0.467712	Body	0.217636	sox13->chr5:8910285-8910785->adamts12	Act	1.40426	0.408726	2.0463
stat3	M01595	chr5:45322450-45322950	adamts3	0.36922	Body	0.306401	stat3->chr5:45322450-45322950->adamts3	Act	1.70202	1.28268	2.24247
rarga	M03394_2.00	chr5:45322450-45322950	adamts3	0.0508909	Body	0.298218	rarga->chr5:45322450-45322950->adamts3	Act	0.588239	1.28268	2.24247
rx1	M03186_2.00	chr5:45442876-45443376	adamts3	0.200924	Body	0.200258	rx1->chr5:45442876-45443376->adamts3	Act	0.850525	1.28268	3.08197
sox2	M05751_2.00	chr5:45442876-45443376	adamts3	0.423071	Body	0.310985	sox2->chr5:45442876-45443376->adamts3	Act	0.777717	1.28268	3.08197
sox8a	M05751_2.00	chr5:45442876-45443376	adamts3	0.499782	Body	0.281067	sox8a->chr5:45442876-45443376->adamts3	Act	1.14831	1.28268	3.08197
sox13	M05751_2.00	chr5:45442876-45443376	adamts3	0.592029	Body	0.403996	sox13->chr5:45442876-45443376->adamts3	Act	1.40426	1.28268	3.08197
runx1	M00271	chr5:45529383-45529883	adamts3	0.148862	Body	0.232616	runx1->chr5:45529383-45529883->adamts3	Act	1.51009	1.28268	1.45844
gli3	M01704	chr5:45529383-45529883	adamts3	0.068013	Body	0.376352	gli3->chr5:45529383-45529883->adamts3	Act	0.96568	1.28268	1.45844
erf	M03974	chr5:45529383-45529883	adamts3	0.0870074	Body	0.22526	erf->chr5:45529383-45529883->adamts3	Act	0.721766	1.28268	1.45844
gli2a	M02641_2.00	chr5:45529383-45529883	adamts3	0.0629451	Body	0.485686	gli2a->chr5:45529383-45529883->adamts3	Act	2.41799	1.28268	1.45844
sox2	M03535_2.00	chr5:45529383-45529883	adamts3	0.165325	Body	0.310985	sox2->chr5:45529383-45529883->adamts3	Act	0.777717	1.28268	1.45844
sox8a	M03535_2.00	chr5:45529383-45529883	adamts3	0.200552	Body	0.281067	sox8a->chr5:45529383-45529883->adamts3	Act	1.14831	1.28268	1.45844
sox13	M03535_2.00	chr5:45529383-45529883	adamts3	0.243436	Body	0.403996	sox13->chr5:45529383-45529883->adamts3	Act	1.40426	1.28268	1.45844
rx1	M06325_2.00	chr5:45529383-45529883	adamts3	0.0579416	Body	0.200258	rx1->chr5:45529383-45529883->adamts3	Act	0.850525	1.28268	1.45844
rarga	M09263_2.00	chr5:45529383-45529883	adamts3	0.0797224	Body	0.298218	rarga->chr5:45529383-45529883->adamts3	Act	0.588239	1.28268	1.45844
sox2	M03545_2.00	chr5:45218994-45219494	adamts3	0.105397	Inter	0.310985	sox2->chr5:45218994-45219494->adamts3	Act	0.777717	1.28268	6.45639
sox8a	M03545_2.00	chr5:45218994-45219494	adamts3	0.145131	Inter	0.281067	sox8a->chr5:45218994-45219494->adamts3	Act	1.14831	1.28268	6.45639
sox13	M03545_2.00	chr5:45218994-45219494	adamts3	0.171255	Inter	0.403996	sox13->chr5:45218994-45219494->adamts3	Act	1.40426	1.28268	6.45639
rx1	M03805_2.00	chr5:45218994-45219494	adamts3	0.128902	Inter	0.200258	rx1->chr5:45218994-45219494->adamts3	Act	0.850525	1.28268	6.45639
rarga	M08223_2.00	chr5:45218994-45219494	adamts3	0.0580514	Inter	0.298218	rarga->chr5:45218994-45219494->adamts3	Act	0.588239	1.28268	6.45639
sox8a	M02912	chr10:11763811-11764311	adamts6	0.0695312	Inter	0.411339	sox8a->chr10:11763811-11764311->adamts6	Act	1.14831	1.45919	0
sox13	M03484_2.00	chr10:11763811-11764311	adamts6	0.141082	Inter	0.308931	sox13->chr10:11763811-11764311->adamts6	Act	1.40426	1.45919	0
sox13	M01026_2.00	chr7:57173012-57173512	ADAMTS7	0.499614	Body	0.141034	sox13->chr7:57173012-57173512->ADAMTS7	Act	1.40426	0.363581	4.04941
tcf7l1a	M00805	chr7:57182430-57182930	ADAMTS7	0.191918	Body	0.161568	tcf7l1a->chr7:57182430-57182930->ADAMTS7	Act	0.749125	0.363581	4.50507
gli3	M01704	chr7:57182430-57182930	ADAMTS7	0.068013	Body	0.189104	gli3->chr7:57182430-57182930->ADAMTS7	Act	0.96568	0.363581	4.50507
gli2a	M02641_2.00	chr7:57182430-57182930	ADAMTS7	0.0629451	Body	0.177319	gli2a->chr7:57182430-57182930->ADAMTS7	Act	2.41799	0.363581	4.50507
nfic	M09815	chr7:57480382-57480882	ADAMTS7	0.368835	Inter	0.16914	nfic->chr7:57480382-57480882->ADAMTS7	Act	2.75632	0.363581	3.5425
sox13	M00197_2.00	chr7:57480382-57480882	ADAMTS7	0.391172	Inter	0.141034	sox13->chr7:57480382-57480882->ADAMTS7	Act	1.40426	0.363581	3.5425
sox2	M00710_2.00	chr17:17969916-17970416	adck1	0.254246	Inter	0.164095	sox2->chr17:17969916-17970416->adck1	Act	0.777717	1.06216	0
sox13	M00710_2.00	chr17:17969916-17970416	adck1	0.304433	Inter	0.188425	sox13->chr17:17969916-17970416->adck1	Act	1.40426	1.06216	0
foxj3	M01987_2.00	chr17:17972134-17972634	adck1	0.0790124	Inter	0.153889	foxj3->chr17:17972134-17972634->adck1	Act	0.808686	1.06216	1.83265
rfx2	M02452_2.00	chr17:17972134-17972634	adck1	0.0810891	Inter	0.0892767	rfx2->chr17:17972134-17972634->adck1	Act	1.13253	1.06216	1.83265
sox2	M03542_2.00	chr17:17972134-17972634	adck1	0.156788	Inter	0.164095	sox2->chr17:17972134-17972634->adck1	Act	0.777717	1.06216	1.83265
sox13	M03542_2.00	chr17:17972134-17972634	adck1	0.197394	Inter	0.188425	sox13->chr17:17972134-17972634->adck1	Act	1.40426	1.06216	1.83265
erfl3	M04794_2.00	chr17:17972134-17972634	adck1	0.0755225	Inter	0.15193	erfl3->chr17:17972134-17972634->adck1	Act	1.01761	1.06216	1.83265
fosl2	M00926	chr17:17992119-17992619	adck1	0.528779	Inter	0.14473	fosl2->chr17:17992119-17992619->adck1	Act	2.31203	1.06216	2.97423
sox2	M08408	chr17:17992119-17992619	adck1	0.068464	Inter	0.164095	sox2->chr17:17992119-17992619->adck1	Act	0.777717	1.06216	2.97423
sox13	M00201_2.00	chr17:17992119-17992619	adck1	0.287812	Inter	0.188425	sox13->chr17:17992119-17992619->adck1	Act	1.40426	1.06216	2.97423
sox2	M04541	chr17:17758937-17759437	adck1	0.0853381	TSS	0.164095	sox2->chr17:17758937-17759437->adck1	Act	0.777717	1.06216	0
sox13	M03507_2.00	chr17:17758937-17759437	adck1	0.123921	TSS	0.188425	sox13->chr17:17758937-17759437->adck1	Act	1.40426	1.06216	0
erfl3	M07950_2.00	chr17:17758937-17759437	adck1	0.055452	TSS	0.15193	erfl3->chr17:17758937-17759437->adck1	Act	1.01761	1.06216	0
gli2a	M02641_2.00	chr9:38023473-38023973	adcy5	0.0629451	Inter	0.336494	gli2a->chr9:38023473-38023973->adcy5	Act	2.41799	0.757235	0
sox13	M03486_2.00	chr23:14031211-14031711	adcy6a	0.0628481	Body	0.534948	sox13->chr23:14031211-14031711->adcy6a	Act	1.40426	1.34371	3.23601
sox2	M03486_2.00	chr23:14031211-14031711	adcy6a	0.0669492	Body	0.375834	sox2->chr23:14031211-14031711->adcy6a	Act	0.777717	1.34371	3.23601
sox8a	M03492_2.00	chr23:14031211-14031711	adcy6a	0.173129	Body	0.418173	sox8a->chr23:14031211-14031711->adcy6a	Act	1.14831	1.34371	3.23601
sox2	M05751_2.00	chr23:14031865-14032365	adcy6a	0.423071	Body	0.375834	sox2->chr23:14031865-14032365->adcy6a	Act	0.777717	1.34371	5.04328
sox8a	M05751_2.00	chr23:14031865-14032365	adcy6a	0.499782	Body	0.418173	sox8a->chr23:14031865-14032365->adcy6a	Act	1.14831	1.34371	5.04328
sox13	M05751_2.00	chr23:14031865-14032365	adcy6a	0.592029	Body	0.534948	sox13->chr23:14031865-14032365->adcy6a	Act	1.40426	1.34371	5.04328
sox2	M03492_2.00	chr23:14032632-14033132	adcy6a	0.161162	Body	0.375834	sox2->chr23:14032632-14033132->adcy6a	Act	0.777717	1.34371	4.22776
sox8a	M03492_2.00	chr23:14032632-14033132	adcy6a	0.173129	Body	0.418173	sox8a->chr23:14032632-14033132->adcy6a	Act	1.14831	1.34371	4.22776
sox13	M03492_2.00	chr23:14032632-14033132	adcy6a	0.210753	Body	0.534948	sox13->chr23:14032632-14033132->adcy6a	Act	1.40426	1.34371	4.22776
rarga	M11183_2.00	chr23:14037831-14038331	adcy6a	0.121386	Body	0.391758	rarga->chr23:14037831-14038331->adcy6a	Act	0.588239	1.34371	4.09106
sox2	M03500_2.00	chr23:14043831-14044331	adcy6a	0.0831739	Body	0.375834	sox2->chr23:14043831-14044331->adcy6a	Act	0.777717	1.34371	2.91864
sox13	M03500_2.00	chr23:14043831-14044331	adcy6a	0.0845745	Body	0.534948	sox13->chr23:14043831-14044331->adcy6a	Act	1.40426	1.34371	2.91864
sox8a	M03507_2.00	chr23:14043831-14044331	adcy6a	0.0937894	Body	0.418173	sox8a->chr23:14043831-14044331->adcy6a	Act	1.14831	1.34371	2.91864
sox2	M05762_2.00	chr23:14046417-14046917	adcy6a	0.422213	Body	0.375834	sox2->chr23:14046417-14046917->adcy6a	Act	0.777717	1.34371	3.53256
sox8a	M05762_2.00	chr23:14046417-14046917	adcy6a	0.499898	Body	0.418173	sox8a->chr23:14046417-14046917->adcy6a	Act	1.14831	1.34371	3.53256
sox13	M05762_2.00	chr23:14046417-14046917	adcy6a	0.589325	Body	0.534948	sox13->chr23:14046417-14046917->adcy6a	Act	1.40426	1.34371	3.53256
nfixa	M00056	chr23:14073144-14073644	adcy6a	0.0775753	Inter	0.334735	nfixa->chr23:14073144-14073644->adcy6a	Act	2.03913	1.34371	1.92922
sox8a	M01014	chr23:26862781-26863281	adcy6b	0.328759	Body	0.328144	sox8a->chr23:26862781-26863281->adcy6b	Act	1.14831	0.637445	5.36986
sox13	M01014	chr23:26862781-26863281	adcy6b	0.447704	Body	0.382189	sox13->chr23:26862781-26863281->adcy6b	Act	1.40426	0.637445	5.36986
rarga	M05884_2.00	chr23:26862781-26863281	adcy6b	0.247843	Body	0.286104	rarga->chr23:26862781-26863281->adcy6b	Act	0.588239	0.637445	5.36986
nfixa	M09379_2.00	chr23:26862781-26863281	adcy6b	0.268995	Body	0.253561	nfixa->chr23:26862781-26863281->adcy6b	Act	2.03913	0.637445	5.36986
nfic	M09379_2.00	chr23:26862781-26863281	adcy6b	0.391555	Body	0.2817	nfic->chr23:26862781-26863281->adcy6b	Act	2.75632	0.637445	5.36986
rarga	M09276_2.00	chr23:26863911-26864411	adcy6b	0.337735	Body	0.286104	rarga->chr23:26863911-26864411->adcy6b	Act	0.588239	0.637445	3.66144
mybl1	M10297	chr23:26887955-26888455	adcy6b	0.315136	Body	0.0343787	mybl1->chr23:26887955-26888455->adcy6b	Act	1.69618	0.637445	0
sox8a	M05769_2.00	chr23:26887955-26888455	adcy6b	0.203492	Body	0.328144	sox8a->chr23:26887955-26888455->adcy6b	Act	1.14831	0.637445	0
sox13	M05769_2.00	chr23:26887955-26888455	adcy6b	0.315793	Body	0.382189	sox13->chr23:26887955-26888455->adcy6b	Act	1.40426	0.637445	0
nfixa	M00193	chr23:27038260-27038760	adcy6b	0.247962	Inter	0.253561	nfixa->chr23:27038260-27038760->adcy6b	Act	2.03913	0.637445	0
sox8a	M00213_2.00	chr23:27038260-27038760	adcy6b	0.362965	Inter	0.328144	sox8a->chr23:27038260-27038760->adcy6b	Act	1.14831	0.637445	0
sox13	M00213_2.00	chr23:27038260-27038760	adcy6b	0.486407	Inter	0.382189	sox13->chr23:27038260-27038760->adcy6b	Act	1.40426	0.637445	0
nfic	M05745_2.00	chr23:27038260-27038760	adcy6b	0.390606	Inter	0.2817	nfic->chr23:27038260-27038760->adcy6b	Act	2.75632	0.637445	0
sox8a	M00213_2.00	chr23:27038763-27039263	adcy6b	0.362965	Inter	0.328144	sox8a->chr23:27038763-27039263->adcy6b	Act	1.14831	0.637445	0
sox13	M00213_2.00	chr23:27038763-27039263	adcy6b	0.486407	Inter	0.382189	sox13->chr23:27038763-27039263->adcy6b	Act	1.40426	0.637445	0
nfixa	M04058	chr23:27065632-27066132	adcy6b	0.287683	Inter	0.253561	nfixa->chr23:27065632-27066132->adcy6b	Act	2.03913	0.637445	4.43879
nfic	M03475_2.00	chr23:27065632-27066132	adcy6b	0.409764	Inter	0.2817	nfic->chr23:27065632-27066132->adcy6b	Act	2.75632	0.637445	4.43879
gli2a	M05331	chr22:26680085-26680585	adcy9	0.0593127	Body	0.227598	gli2a->chr22:26680085-26680585->adcy9	Act	2.41799	0.395163	2.82284
sox8a	M05783_2.00	chr6:33023466-33023966	adcyap1r1a	0.392668	Body	0.527281	sox8a->chr6:33023466-33023966->adcyap1r1a	Act	1.14831	0.72868	0
sox13	M05783_2.00	chr6:33023466-33023966	adcyap1r1a	0.507444	Body	0.478807	sox13->chr6:33023466-33023966->adcyap1r1a	Act	1.40426	0.72868	0
nfic	M03475_2.00	chr6:33040882-33041382	adcyap1r1a	0.409764	Inter	0.348579	nfic->chr6:33040882-33041382->adcyap1r1a	Act	2.75632	0.72868	3.04885
sox8a	M05753_2.00	chr6:33040882-33041382	adcyap1r1a	0.41249	Inter	0.527281	sox8a->chr6:33040882-33041382->adcyap1r1a	Act	1.14831	0.72868	3.04885
sox13	M05753_2.00	chr6:33040882-33041382	adcyap1r1a	0.521999	Inter	0.478807	sox13->chr6:33040882-33041382->adcyap1r1a	Act	1.40426	0.72868	3.04885
stat3	M09645_2.00	chr6:33040882-33041382	adcyap1r1a	0.326624	Inter	0.396499	stat3->chr6:33040882-33041382->adcyap1r1a	Act	1.70202	0.72868	3.04885
sox8a	M00205_2.00	chr6:33047565-33048065	adcyap1r1a	0.269599	Inter	0.527281	sox8a->chr6:33047565-33048065->adcyap1r1a	Act	1.14831	0.72868	1.65772
sox13	M00205_2.00	chr6:33047565-33048065	adcyap1r1a	0.377959	Inter	0.478807	sox13->chr6:33047565-33048065->adcyap1r1a	Act	1.40426	0.72868	1.65772
tead1a	M04141	chr6:33130224-33130724	adcyap1r1a	0.373323	Inter	0.187155	tead1a->chr6:33130224-33130724->adcyap1r1a	Act	1.61908	0.72868	0
sox13	M03534_2.00	chr6:33141916-33142416	adcyap1r1a	0.0881191	Inter	0.478807	sox13->chr6:33141916-33142416->adcyap1r1a	Act	1.40426	0.72868	4.75283
tead1a	M09438_2.00	chr6:33141916-33142416	adcyap1r1a	0.370085	Inter	0.187155	tead1a->chr6:33141916-33142416->adcyap1r1a	Act	1.61908	0.72868	4.75283
sox8a	M08039	chr6:33146961-33147461	adcyap1r1a	0.108699	Inter	0.527281	sox8a->chr6:33146961-33147461->adcyap1r1a	Act	1.14831	0.72868	3.77321
sox13	M03483_2.00	chr6:33146961-33147461	adcyap1r1a	0.121407	Inter	0.478807	sox13->chr6:33146961-33147461->adcyap1r1a	Act	1.40426	0.72868	3.77321
gli3	M01704	chr6:33151362-33151862	adcyap1r1a	0.068013	Inter	0.391088	gli3->chr6:33151362-33151862->adcyap1r1a	Act	0.96568	0.72868	0
gli2a	M02641_2.00	chr6:33151362-33151862	adcyap1r1a	0.0629451	Inter	0.578656	gli2a->chr6:33151362-33151862->adcyap1r1a	Act	2.41799	0.72868	0
hlfa	M00260	chr6:33151991-33152491	adcyap1r1a	0.245076	Inter	0.359886	hlfa->chr6:33151991-33152491->adcyap1r1a	Act	0.589804	0.72868	0
nfic	M03475_2.00	chr6:33176187-33176687	adcyap1r1a	0.409764	Inter	0.348579	nfic->chr6:33176187-33176687->adcyap1r1a	Act	2.75632	0.72868	4.37593
sox13	M03504_2.00	chr6:33176187-33176687	adcyap1r1a	0.0542881	Inter	0.478807	sox13->chr6:33176187-33176687->adcyap1r1a	Act	1.40426	0.72868	4.37593
sox8a	M03973_2.00	chr6:33176187-33176687	adcyap1r1a	0.23967	Inter	0.527281	sox8a->chr6:33176187-33176687->adcyap1r1a	Act	1.14831	0.72868	4.37593
tead1a	M09435_2.00	chr6:33179529-33180029	adcyap1r1a	0.312626	Inter	0.187155	tead1a->chr6:33179529-33180029->adcyap1r1a	Act	1.61908	0.72868	0
stat3	M09664	chr6:33194095-33194595	adcyap1r1a	0.37314	Inter	0.396499	stat3->chr6:33194095-33194595->adcyap1r1a	Act	1.70202	0.72868	3.19607
sox8a	M06449_2.00	chr6:33216230-33216730	adcyap1r1a	0.428475	Inter	0.527281	sox8a->chr6:33216230-33216730->adcyap1r1a	Act	1.14831	0.72868	0
sox13	M06449_2.00	chr6:33216230-33216730	adcyap1r1a	0.560277	Inter	0.478807	sox13->chr6:33216230-33216730->adcyap1r1a	Act	1.40426	0.72868	0
sox8a	M03977_2.00	chr22:30063718-30064218	add3a	0.166869	Body	0.244535	sox8a->chr22:30063718-30064218->add3a	Act	1.14831	0.793678	0
sox13	M03977_2.00	chr22:30063718-30064218	add3a	0.228937	Body	0.289175	sox13->chr22:30063718-30064218->add3a	Act	1.40426	0.793678	0
erfl3	M09058_2.00	chr22:30063718-30064218	add3a	0.365279	Body	0.231224	erfl3->chr22:30063718-30064218->add3a	Act	1.01761	0.793678	0
tcf7l1a	M09400_2.00	chr22:30063718-30064218	add3a	0.347609	Body	0.160842	tcf7l1a->chr22:30063718-30064218->add3a	Act	0.749125	0.793678	0
tcf7l1a	M00805	chr22:30088964-30089464	add3a	0.191918	Body	0.160842	tcf7l1a->chr22:30088964-30089464->add3a	Act	0.749125	0.793678	0
sox8a	M03513_2.00	chr22:30088964-30089464	add3a	0.137653	Body	0.244535	sox8a->chr22:30088964-30089464->add3a	Act	1.14831	0.793678	0
sox13	M03513_2.00	chr22:30088964-30089464	add3a	0.186252	Body	0.289175	sox13->chr22:30088964-30089464->add3a	Act	1.40426	0.793678	0
tcf7l1a	M00805	chr22:30126476-30126976	add3a	0.191918	Body	0.160842	tcf7l1a->chr22:30126476-30126976->add3a	Act	0.749125	0.793678	0
sox8a	M00710_2.00	chr22:30126476-30126976	add3a	0.218984	Body	0.244535	sox8a->chr22:30126476-30126976->add3a	Act	1.14831	0.793678	0
sox13	M00710_2.00	chr22:30126476-30126976	add3a	0.304433	Body	0.289175	sox13->chr22:30126476-30126976->add3a	Act	1.40426	0.793678	0
erfl3	M09061_2.00	chr22:30158685-30159185	add3a	0.224653	Body	0.231224	erfl3->chr22:30158685-30159185->add3a	Act	1.01761	0.793678	2.29519
sox8a	M01014	chr22:30168805-30169305	add3a	0.328759	Body	0.244535	sox8a->chr22:30168805-30169305->add3a	Act	1.14831	0.793678	0
sox13	M01014	chr22:30168805-30169305	add3a	0.447704	Body	0.289175	sox13->chr22:30168805-30169305->add3a	Act	1.40426	0.793678	0
erfl3	M09048_2.00	chr22:30168805-30169305	add3a	0.264324	Body	0.231224	erfl3->chr22:30168805-30169305->add3a	Act	1.01761	0.793678	0
tcf7l1a	M00805	chr22:30183651-30184151	add3a	0.191918	Body	0.160842	tcf7l1a->chr22:30183651-30184151->add3a	Act	0.749125	0.793678	0
erfl3	M06188_2.00	chr22:30183651-30184151	add3a	0.0780368	Body	0.231224	erfl3->chr22:30183651-30184151->add3a	Act	1.01761	0.793678	0
tcf7l1a	M00805	chr22:30184274-30184774	add3a	0.191918	Body	0.160842	tcf7l1a->chr22:30184274-30184774->add3a	Act	0.749125	0.793678	0
sox8a	M08039	chr22:30193196-30193696	add3a	0.108699	Body	0.244535	sox8a->chr22:30193196-30193696->add3a	Act	1.14831	0.793678	0
sox13	M08899	chr22:30193196-30193696	add3a	0.46894	Body	0.289175	sox13->chr22:30193196-30193696->add3a	Act	1.40426	0.793678	0
stat3	M09664	chr22:30208591-30209091	add3a	0.37314	Body	0.244518	stat3->chr22:30208591-30209091->add3a	Act	1.70202	0.793678	3.02708
sox8a	M08040_2.00	chr22:29866381-29866881	add3a	0.399162	Inter	0.244535	sox8a->chr22:29866381-29866881->add3a	Act	1.14831	0.793678	5.4503
sox13	M08040_2.00	chr22:29866381-29866881	add3a	0.542936	Inter	0.289175	sox13->chr22:29866381-29866881->add3a	Act	1.40426	0.793678	5.4503
sox8a	M05769_2.00	chr22:29874505-29875005	add3a	0.203492	Inter	0.244535	sox8a->chr22:29874505-29875005->add3a	Act	1.14831	0.793678	0
sox13	M05769_2.00	chr22:29874505-29875005	add3a	0.315793	Inter	0.289175	sox13->chr22:29874505-29875005->add3a	Act	1.40426	0.793678	0
erfl3	M04802_2.00	chr22:30046366-30046866	add3a	0.18391	TSS	0.231224	erfl3->chr22:30046366-30046866->add3a	Act	1.01761	0.793678	0
sox8a	M11331_2.00	chr22:30046366-30046866	add3a	0.448372	TSS	0.244535	sox8a->chr22:30046366-30046866->add3a	Act	1.14831	0.793678	0
sox13	M11331_2.00	chr22:30046366-30046866	add3a	0.562935	TSS	0.289175	sox13->chr22:30046366-30046866->add3a	Act	1.40426	0.793678	0
rarga	M03354_2.00	chr8:38081343-38081843	adgra2	0.0562211	Body	0.453627	rarga->chr8:38081343-38081843->adgra2	Act	0.588239	1.5068	2.40381
sox2	M08973	chr8:38128779-38129279	adgra2	0.354951	Body	0.405309	sox2->chr8:38128779-38129279->adgra2	Act	0.777717	1.5068	3.39096
sox8a	M00710_2.00	chr8:38128779-38129279	adgra2	0.218984	Body	0.537905	sox8a->chr8:38128779-38129279->adgra2	Act	1.14831	1.5068	3.39096
sox13	M00710_2.00	chr8:38128779-38129279	adgra2	0.304433	Body	0.621772	sox13->chr8:38128779-38129279->adgra2	Act	1.40426	1.5068	3.39096
sox2	M08042_2.00	chr8:38131359-38131859	adgra2	0.168242	Body	0.405309	sox2->chr8:38131359-38131859->adgra2	Act	0.777717	1.5068	3.71014
sox8a	M08042_2.00	chr8:38131359-38131859	adgra2	0.198572	Body	0.537905	sox8a->chr8:38131359-38131859->adgra2	Act	1.14831	1.5068	3.71014
sox13	M08042_2.00	chr8:38131359-38131859	adgra2	0.22528	Body	0.621772	sox13->chr8:38131359-38131859->adgra2	Act	1.40426	1.5068	3.71014
rarga	M09317_2.00	chr8:38131359-38131859	adgra2	0.0807925	Body	0.453627	rarga->chr8:38131359-38131859->adgra2	Act	0.588239	1.5068	3.71014
stat3	M00223	chr8:38138158-38138658	adgra2	0.269873	Body	0.460572	stat3->chr8:38138158-38138658->adgra2	Act	1.70202	1.5068	5.7388
sox2	M07308	chr8:38138158-38138658	adgra2	0.328253	Body	0.405309	sox2->chr8:38138158-38138658->adgra2	Act	0.777717	1.5068	5.7388
sox8a	M03969_2.00	chr8:38138158-38138658	adgra2	0.277766	Body	0.537905	sox8a->chr8:38138158-38138658->adgra2	Act	1.14831	1.5068	5.7388
sox13	M03969_2.00	chr8:38138158-38138658	adgra2	0.376917	Body	0.621772	sox13->chr8:38138158-38138658->adgra2	Act	1.40426	1.5068	5.7388
mybl1	M02780	chr8:38159480-38159980	adgra2	0.161062	Body	0.0545818	mybl1->chr8:38159480-38159980->adgra2	Act	1.69618	1.5068	1.48959
sox2	M03500_2.00	chr8:38159480-38159980	adgra2	0.0831739	Body	0.405309	sox2->chr8:38159480-38159980->adgra2	Act	0.777717	1.5068	1.48959
sox13	M03500_2.00	chr8:38159480-38159980	adgra2	0.0845745	Body	0.621772	sox13->chr8:38159480-38159980->adgra2	Act	1.40426	1.5068	1.48959
mybl1	M08890	chr8:38178145-38178645	adgra2	0.112543	Inter	0.0545818	mybl1->chr8:38178145-38178645->adgra2	Act	1.69618	1.5068	0
sox2	M03976_2.00	chr8:38178145-38178645	adgra2	0.320788	Inter	0.405309	sox2->chr8:38178145-38178645->adgra2	Act	0.777717	1.5068	0
sox8a	M03976_2.00	chr8:38178145-38178645	adgra2	0.334215	Inter	0.537905	sox8a->chr8:38178145-38178645->adgra2	Act	1.14831	1.5068	0
sox13	M03976_2.00	chr8:38178145-38178645	adgra2	0.421027	Inter	0.621772	sox13->chr8:38178145-38178645->adgra2	Act	1.40426	1.5068	0
sox8a	M09396_2.00	chr8:38104849-38105349	adgra2	0.378805	TSS	0.537905	sox8a->chr8:38104849-38105349->adgra2	Act	1.14831	1.5068	0
sox2	M09396_2.00	chr8:38104849-38105349	adgra2	0.386768	TSS	0.405309	sox2->chr8:38104849-38105349->adgra2	Act	0.777717	1.5068	0
sox13	M09396_2.00	chr8:38104849-38105349	adgra2	0.506998	TSS	0.621772	sox13->chr8:38104849-38105349->adgra2	Act	1.40426	1.5068	0
mybl1	M02780	chr8:38158901-38159401	adgra2	0.161062	TSS	0.0545818	mybl1->chr8:38158901-38159401->adgra2	Act	1.69618	1.5068	2.94639
sox8a	M08039	chr8:38158901-38159401	adgra2	0.108699	TSS	0.537905	sox8a->chr8:38158901-38159401->adgra2	Act	1.14831	1.5068	2.94639
sox2	M03483_2.00	chr8:38158901-38159401	adgra2	0.0914671	TSS	0.405309	sox2->chr8:38158901-38159401->adgra2	Act	0.777717	1.5068	2.94639
sox13	M03483_2.00	chr8:38158901-38159401	adgra2	0.121407	TSS	0.621772	sox13->chr8:38158901-38159401->adgra2	Act	1.40426	1.5068	2.94639
sox8a	M03487_2.00	chr7:28657955-28658455	adgrg1	0.0815095	Body	0.208866	sox8a->chr7:28657955-28658455->adgrg1	Act	1.14831	0.315345	0
sox2	M03487_2.00	chr7:28657955-28658455	adgrg1	0.109219	Body	0.20531	sox2->chr7:28657955-28658455->adgrg1	Act	0.777717	0.315345	0
sox13	M03487_2.00	chr7:28657955-28658455	adgrg1	0.137222	Body	0.265649	sox13->chr7:28657955-28658455->adgrg1	Act	1.40426	0.315345	0
gli2a	M05331	chr7:28668698-28669198	adgrg1	0.0593127	Body	0.319191	gli2a->chr7:28668698-28669198->adgrg1	Act	2.41799	0.315345	0
tcf7l1b	M10095	chr7:28694849-28695349	adgrg1	0.107705	Body	0.102916	tcf7l1b->chr7:28694849-28695349->adgrg1	Act	0.336061	0.315345	0
runx1	M00271	chr7:28696369-28696869	adgrg1	0.148862	Body	0.200427	runx1->chr7:28696369-28696869->adgrg1	Act	1.51009	0.315345	0
sox8a	M01014	chr7:28682028-28682528	adgrg1	0.328759	TSS	0.208866	sox8a->chr7:28682028-28682528->adgrg1	Act	1.14831	0.315345	5.23232
sox2	M01014	chr7:28682028-28682528	adgrg1	0.352046	TSS	0.20531	sox2->chr7:28682028-28682528->adgrg1	Act	0.777717	0.315345	5.23232
sox13	M01014	chr7:28682028-28682528	adgrg1	0.447704	TSS	0.265649	sox13->chr7:28682028-28682528->adgrg1	Act	1.40426	0.315345	5.23232
tcf7l1b	M09386_2.00	chr7:28695689-28696189	adgrg1	0.24672	TSS	0.102916	tcf7l1b->chr7:28695689-28696189->adgrg1	Act	0.336061	0.315345	0
sox8a	M09388_2.00	chr7:28695689-28696189	adgrg1	0.417816	TSS	0.208866	sox8a->chr7:28695689-28696189->adgrg1	Act	1.14831	0.315345	0
sox2	M09388_2.00	chr7:28695689-28696189	adgrg1	0.438177	TSS	0.20531	sox2->chr7:28695689-28696189->adgrg1	Act	0.777717	0.315345	0
sox13	M09388_2.00	chr7:28695689-28696189	adgrg1	0.566188	TSS	0.265649	sox13->chr7:28695689-28696189->adgrg1	Act	1.40426	0.315345	0
tcf7l1a	M00805	chr13:24952614-24953114	adka	0.191918	Body	0.26272	tcf7l1a->chr13:24952614-24953114->adka	Act	0.749125	0.849432	1.66322
myb	M07219	chr13:24952614-24953114	adka	0.19124	Body	0.303368	myb->chr13:24952614-24953114->adka	Act	1.14685	0.849432	1.66322
e2f3	M00918	chr13:25046217-25046717	adka	0.140908	Body	0.217013	e2f3->chr13:25046217-25046717->adka	Act	0.665166	0.849432	3.24639
e2f3	M09043_2.00	chr13:25166297-25166797	adka	0.202445	Body	0.217013	e2f3->chr13:25166297-25166797->adka	Act	0.665166	0.849432	3.75971
tead1a	M04141	chr13:25198983-25199483	adka	0.373323	Body	0.254112	tead1a->chr13:25198983-25199483->adka	Act	1.61908	0.849432	0
tead1a	M08175_2.00	chr13:25443751-25444251	adka	0.417358	Inter	0.254112	tead1a->chr13:25443751-25444251->adka	Act	1.61908	0.849432	0
tead1a	M04141	chr13:25198443-25198943	adka	0.373323	TSS	0.254112	tead1a->chr13:25198443-25198943->adka	Act	1.61908	0.849432	0
e2f3	M07083	chr13:25199557-25200057	adka	0.161533	TSS	0.217013	e2f3->chr13:25199557-25200057->adka	Act	0.665166	0.849432	0
olig2	M09703	chr13:25199557-25200057	adka	0.0616604	TSS	0.272162	olig2->chr13:25199557-25200057->adka	Act	1.16665	0.849432	0
tead1a	M03996_2.00	chr13:25199557-25200057	adka	0.38626	TSS	0.254112	tead1a->chr13:25199557-25200057->adka	Act	1.61908	0.849432	0
sox8a	M05791_2.00	chr12:15177926-15178426	adprh	0.417525	Body	0.111855	sox8a->chr12:15177926-15178426->adprh	Act	1.14831	0.400734	0
nfic	M09385_2.00	chr12:15149071-15149571	adprh	0.403628	TSS	0.0969716	nfic->chr12:15149071-15149571->adprh	Act	2.75632	0.400734	2.42331
zic2b	M04486_2.00	chr4:2807186-2807686	aebp2	0.226376	Inter	0.125443	zic2b->chr4:2807186-2807686->aebp2	Act	1.25359	0.48241	0
fosl2	M03870	chr4:2826908-2827408	aebp2	0.542626	Inter	0.13743	fosl2->chr4:2826908-2827408->aebp2	Act	2.31203	0.48241	1.93474
fosl2	M08915	chr4:2918514-2919014	aebp2	0.207604	Inter	0.13743	fosl2->chr4:2918514-2919014->aebp2	Act	2.31203	0.48241	5.06697
fosl2	M07826_2.00	chr4:2919847-2920347	aebp2	0.551534	Inter	0.13743	fosl2->chr4:2919847-2920347->aebp2	Act	2.31203	0.48241	3.48186
fosl2	M03870	chr4:2968088-2968588	aebp2	0.542626	Inter	0.13743	fosl2->chr4:2968088-2968588->aebp2	Act	2.31203	0.48241	4.49123
ascl1a	M09767	chr4:2968088-2968588	aebp2	0.0649742	Inter	0.117546	ascl1a->chr4:2968088-2968588->aebp2	Act	0.683363	0.48241	4.49123
runx1	M00271	chr4:3071046-3071546	aebp2	0.148862	Inter	0.13163	runx1->chr4:3071046-3071546->aebp2	Act	1.51009	0.48241	4.1987
fosl2	M04333_2.00	chr4:3129877-3130377	aebp2	0.533655	Inter	0.13743	fosl2->chr4:3129877-3130377->aebp2	Act	2.31203	0.48241	2.73194
runx1	M00769	chr4:3179962-3180462	aebp2	0.224373	Inter	0.13163	runx1->chr4:3179962-3180462->aebp2	Act	1.51009	0.48241	2.46086
zic2b	M00151_2.00	chr4:3179962-3180462	aebp2	0.191352	Inter	0.125443	zic2b->chr4:3179962-3180462->aebp2	Act	1.25359	0.48241	2.46086
tcf7l1a	M01594	chr4:2944397-2944897	aebp2	0.328895	TSS	0.138993	tcf7l1a->chr4:2944397-2944897->aebp2	Act	0.749125	0.48241	0
tcf7l1a	M01594	chr4:2945065-2945565	aebp2	0.328895	TSS	0.138993	tcf7l1a->chr4:2945065-2945565->aebp2	Act	0.749125	0.48241	0.951819
mybl1	M09601_2.00	chr4:2945065-2945565	aebp2	0.322532	TSS	0.160241	mybl1->chr4:2945065-2945565->aebp2	Act	1.69618	0.48241	0.951819
sox8a	M03487_2.00	chr12:30253856-30254356	afap1l2	0.0815095	Body	0.155399	sox8a->chr12:30253856-30254356->afap1l2	Act	1.14831	0.618067	0
sox13	M03487_2.00	chr12:30253856-30254356	afap1l2	0.137222	Body	0.23516	sox13->chr12:30253856-30254356->afap1l2	Act	1.40426	0.618067	0
rarga	M06416_2.00	chr12:30262458-30262958	afap1l2	0.280277	Body	0.249668	rarga->chr12:30262458-30262958->afap1l2	Act	0.588239	0.618067	4.23248
sox8a	M08041_2.00	chr12:30262458-30262958	afap1l2	0.280954	Body	0.155399	sox8a->chr12:30262458-30262958->afap1l2	Act	1.14831	0.618067	4.23248
sox13	M08041_2.00	chr12:30262458-30262958	afap1l2	0.372203	Body	0.23516	sox13->chr12:30262458-30262958->afap1l2	Act	1.40426	0.618067	4.23248
sox8a	M01014	chr12:30287432-30287932	afap1l2	0.328759	Body	0.155399	sox8a->chr12:30287432-30287932->afap1l2	Act	1.14831	0.618067	4.65582
sox13	M01014	chr12:30287432-30287932	afap1l2	0.447704	Body	0.23516	sox13->chr12:30287432-30287932->afap1l2	Act	1.40426	0.618067	4.65582
rarga	M08152_2.00	chr12:30287432-30287932	afap1l2	0.20127	Body	0.249668	rarga->chr12:30287432-30287932->afap1l2	Act	0.588239	0.618067	4.65582
sox8a	M03973_2.00	chr12:30223214-30223714	afap1l2	0.23967	Inter	0.155399	sox8a->chr12:30223214-30223714->afap1l2	Act	1.14831	0.618067	0
sox13	M03973_2.00	chr12:30223214-30223714	afap1l2	0.3116	Inter	0.23516	sox13->chr12:30223214-30223714->afap1l2	Act	1.40426	0.618067	0
sox2	M08899	chr20:32402180-32402680	afg1lb	0.374741	Body	0.143465	sox2->chr20:32402180-32402680->afg1lb	Act	0.777717	0.609671	0
sox13	M08899	chr20:32402180-32402680	afg1lb	0.46894	Body	0.178129	sox13->chr20:32402180-32402680->afg1lb	Act	1.40426	0.609671	0
nfic	M03475_2.00	chr20:32402180-32402680	afg1lb	0.409764	Body	0.129428	nfic->chr20:32402180-32402680->afg1lb	Act	2.75632	0.609671	0
tcf7l1a	M00805	chr20:32223006-32223506	afg1lb	0.191918	Inter	0.151825	tcf7l1a->chr20:32223006-32223506->afg1lb	Act	0.749125	0.609671	1.11468
sox2	M02718_2.00	chr20:32223006-32223506	afg1lb	0.315402	Inter	0.143465	sox2->chr20:32223006-32223506->afg1lb	Act	0.777717	0.609671	1.11468
sox13	M02718_2.00	chr20:32223006-32223506	afg1lb	0.382777	Inter	0.178129	sox13->chr20:32223006-32223506->afg1lb	Act	1.40426	0.609671	1.11468
nfic	M09381_2.00	chr20:32223006-32223506	afg1lb	0.380148	Inter	0.129428	nfic->chr20:32223006-32223506->afg1lb	Act	2.75632	0.609671	1.11468
myb	M02883	chr20:32231363-32231863	afg1lb	0.191164	Inter	0.110459	myb->chr20:32231363-32231863->afg1lb	Act	1.14685	0.609671	0
rfx2	M02452_2.00	chr20:32261907-32262407	afg1lb	0.0810891	Inter	0.141947	rfx2->chr20:32261907-32262407->afg1lb	Act	1.13253	0.609671	4.7238
erf	M04763_2.00	chr20:32261907-32262407	afg1lb	0.1369	Inter	0.116216	erf->chr20:32261907-32262407->afg1lb	Act	0.721766	0.609671	4.7238
sox2	M04539	chr20:32524842-32525342	afg1lb	0.170095	Inter	0.143465	sox2->chr20:32524842-32525342->afg1lb	Act	0.777717	0.609671	2.01384
sox13	M00197_2.00	chr20:32524842-32525342	afg1lb	0.391172	Inter	0.178129	sox13->chr20:32524842-32525342->afg1lb	Act	1.40426	0.609671	2.01384
nfic	M03478_2.00	chr20:32524842-32525342	afg1lb	0.410432	Inter	0.129428	nfic->chr20:32524842-32525342->afg1lb	Act	2.75632	0.609671	2.01384
rfx2	M03962_2.00	chr20:32524842-32525342	afg1lb	0.138106	Inter	0.141947	rfx2->chr20:32524842-32525342->afg1lb	Act	1.13253	0.609671	2.01384
sox13	M03504_2.00	chr20:32405177-32405677	afg1lb	0.0542881	TSS	0.178129	sox13->chr20:32405177-32405677->afg1lb	Act	1.40426	0.609671	0
erf	M03974	chr20:32405782-32406282	afg1lb	0.0870074	TSS	0.116216	erf->chr20:32405782-32406282->afg1lb	Act	0.721766	0.609671	0
rfx2	M04096	chr20:32405782-32406282	afg1lb	0.209823	TSS	0.141947	rfx2->chr20:32405782-32406282->afg1lb	Act	1.13253	0.609671	0
sox2	M03484_2.00	chr20:32405782-32406282	afg1lb	0.11663	TSS	0.143465	sox2->chr20:32405782-32406282->afg1lb	Act	0.777717	0.609671	0
sox13	M03484_2.00	chr20:32405782-32406282	afg1lb	0.141082	TSS	0.178129	sox13->chr20:32405782-32406282->afg1lb	Act	1.40426	0.609671	0
zic2b	M04485_2.00	chr20:32405782-32406282	afg1lb	0.218906	TSS	0.0854284	zic2b->chr20:32405782-32406282->afg1lb	Act	1.25359	0.609671	0
tcf7l1a	M05757_2.00	chr20:32405782-32406282	afg1lb	0.0618552	TSS	0.151825	tcf7l1a->chr20:32405782-32406282->afg1lb	Act	0.749125	0.609671	0
tcf7l1b	M05757_2.00	chr20:32405782-32406282	afg1lb	0.100263	TSS	0.161194	tcf7l1b->chr20:32405782-32406282->afg1lb	Act	0.336061	0.609671	0
sox2	M10067	chr24:34160093-34160593	agap3	0.445195	Body	0.316009	sox2->chr24:34160093-34160593->agap3	Act	0.777717	1.44189	1.72396
sox8a	M00205_2.00	chr24:34160093-34160593	agap3	0.269599	Body	0.332554	sox8a->chr24:34160093-34160593->agap3	Act	1.14831	1.44189	1.72396
sox13	M00205_2.00	chr24:34160093-34160593	agap3	0.377959	Body	0.439499	sox13->chr24:34160093-34160593->agap3	Act	1.40426	1.44189	1.72396
fosl2	M04335_2.00	chr24:34310680-34311180	agap3	0.179559	Body	0.211239	fosl2->chr24:34310680-34311180->agap3	Act	2.31203	1.44189	4.6545
sox2	M05761_2.00	chr24:34310680-34311180	agap3	0.426042	Body	0.316009	sox2->chr24:34310680-34311180->agap3	Act	0.777717	1.44189	4.6545
sox8a	M05761_2.00	chr24:34310680-34311180	agap3	0.504096	Body	0.332554	sox8a->chr24:34310680-34311180->agap3	Act	1.14831	1.44189	4.6545
sox13	M05761_2.00	chr24:34310680-34311180	agap3	0.596292	Body	0.439499	sox13->chr24:34310680-34311180->agap3	Act	1.40426	1.44189	4.6545
runx1	M00271	chr24:34336320-34336820	agap3	0.148862	Inter	0.145946	runx1->chr24:34336320-34336820->agap3	Act	1.51009	1.44189	3.63524
fosl2	M01809_2.00	chr24:34336320-34336820	agap3	0.0742688	Inter	0.211239	fosl2->chr24:34336320-34336820->agap3	Act	2.31203	1.44189	3.63524
nfic	M03476_2.00	chr24:34336320-34336820	agap3	0.287847	Inter	0.309892	nfic->chr24:34336320-34336820->agap3	Act	2.75632	1.44189	3.63524
sox8a	M03487_2.00	chr24:34336320-34336820	agap3	0.0815095	Inter	0.332554	sox8a->chr24:34336320-34336820->agap3	Act	1.14831	1.44189	3.63524
sox2	M03487_2.00	chr24:34336320-34336820	agap3	0.109219	Inter	0.316009	sox2->chr24:34336320-34336820->agap3	Act	0.777717	1.44189	3.63524
sox13	M03487_2.00	chr24:34336320-34336820	agap3	0.137222	Inter	0.439499	sox13->chr24:34336320-34336820->agap3	Act	1.40426	1.44189	3.63524
tbx4	M08044_2.00	chr24:34336320-34336820	agap3	0.0681281	Inter	0.303385	tbx4->chr24:34336320-34336820->agap3	Act	0.88484	1.44189	3.63524
mybl1	M11054_2.00	chr24:34336320-34336820	agap3	0.075731	Inter	0.158637	mybl1->chr24:34336320-34336820->agap3	Act	1.69618	1.44189	3.63524
sox2	M02246	chr24:34348533-34349033	agap3	0.217687	Inter	0.316009	sox2->chr24:34348533-34349033->agap3	Act	0.777717	1.44189	0
sox8a	M03487_2.00	chr24:34348533-34349033	agap3	0.0815095	Inter	0.332554	sox8a->chr24:34348533-34349033->agap3	Act	1.14831	1.44189	0
sox13	M03487_2.00	chr24:34348533-34349033	agap3	0.137222	Inter	0.439499	sox13->chr24:34348533-34349033->agap3	Act	1.40426	1.44189	0
nfic	M09381_2.00	chr24:34334315-34334815	agap3	0.380148	TSS	0.309892	nfic->chr24:34334315-34334815->agap3	Act	2.75632	1.44189	2.72775
stat3	M01220	chr15:35192766-35193266	agfg1a	0.281591	Body	0.12321	stat3->chr15:35192766-35193266->agfg1a	Act	1.70202	0.408914	2.55161
sox2	M03981_2.00	chr15:35192766-35193266	agfg1a	0.223198	Body	0.131328	sox2->chr15:35192766-35193266->agfg1a	Act	0.777717	0.408914	2.55161
sox13	M03981_2.00	chr15:35192766-35193266	agfg1a	0.294193	Body	0.14279	sox13->chr15:35192766-35193266->agfg1a	Act	1.40426	0.408914	2.55161
gli2a	M02641_2.00	chr15:35212298-35212798	agfg1a	0.0629451	Body	0.167607	gli2a->chr15:35212298-35212798->agfg1a	Act	2.41799	0.408914	0
sox2	M03539_2.00	chr15:35212298-35212798	agfg1a	0.0563131	Body	0.131328	sox2->chr15:35212298-35212798->agfg1a	Act	0.777717	0.408914	0
sox13	M03539_2.00	chr15:35212298-35212798	agfg1a	0.0690357	Body	0.14279	sox13->chr15:35212298-35212798->agfg1a	Act	1.40426	0.408914	0
erf	M06188_2.00	chr15:35212298-35212798	agfg1a	0.0709099	Body	0.112112	erf->chr15:35212298-35212798->agfg1a	Act	0.721766	0.408914	0
erfl3	M06188_2.00	chr15:35212298-35212798	agfg1a	0.0780368	Body	0.137486	erfl3->chr15:35212298-35212798->agfg1a	Act	1.01761	0.408914	0
stat3	M09645_2.00	chr15:35212298-35212798	agfg1a	0.326624	Body	0.12321	stat3->chr15:35212298-35212798->agfg1a	Act	1.70202	0.408914	0
tead1a	M04141	chr15:35039490-35039990	agfg1a	0.373323	Inter	0.157618	tead1a->chr15:35039490-35039990->agfg1a	Act	1.61908	0.408914	4.04543
sox2	M01272	chr15:35040407-35040907	agfg1a	0.326862	Inter	0.131328	sox2->chr15:35040407-35040907->agfg1a	Act	0.777717	0.408914	4.00357
sox13	M02718_2.00	chr15:35040407-35040907	agfg1a	0.382777	Inter	0.14279	sox13->chr15:35040407-35040907->agfg1a	Act	1.40426	0.408914	4.00357
erf	M09061_2.00	chr15:35422710-35423210	agfg1a	0.191975	Inter	0.112112	erf->chr15:35422710-35423210->agfg1a	Act	0.721766	0.408914	0
erfl3	M09061_2.00	chr15:35422710-35423210	agfg1a	0.224653	Inter	0.137486	erfl3->chr15:35422710-35423210->agfg1a	Act	1.01761	0.408914	0
tcf7l1a	M00805	chr16:51044170-51044670	ago3a	0.191918	Body	0.0757758	tcf7l1a->chr16:51044170-51044670->ago3a	Act	0.749125	0.509117	3.17389
fosl2	M08795_2.00	chr16:51044170-51044670	ago3a	0.551934	Body	0.0965459	fosl2->chr16:51044170-51044670->ago3a	Act	2.31203	0.509117	3.17389
erfl3	M07947_2.00	chr16:51049754-51050254	ago3a	0.058945	Body	0.077512	erfl3->chr16:51049754-51050254->ago3a	Act	1.01761	0.509117	4.54164
fosl2	M08915	chr16:51072121-51072621	ago3a	0.207604	TSS	0.0965459	fosl2->chr16:51072121-51072621->ago3a	Act	2.31203	0.509117	0
tead1a	M03575_2.00	chr16:51072121-51072621	ago3a	0.193302	TSS	0.0640766	tead1a->chr16:51072121-51072621->ago3a	Act	1.61908	0.509117	0
erfl3	M03722_2.00	chr16:51072121-51072621	ago3a	0.0739347	TSS	0.077512	erfl3->chr16:51072121-51072621->ago3a	Act	1.01761	0.509117	0
fosl2	M08915	chr16:51072627-51073127	ago3a	0.207604	TSS	0.0965459	fosl2->chr16:51072627-51073127->ago3a	Act	2.31203	0.509117	0
erfl3	M09057_2.00	chr16:51072627-51073127	ago3a	0.317973	TSS	0.077512	erfl3->chr16:51072627-51073127->ago3a	Act	1.01761	0.509117	0
foxj3	M09094_2.00	chr13:6032598-6033098	agpat5	0.0542933	Inter	0.0635842	foxj3->chr13:6032598-6033098->agpat5	Act	0.808686	0.373527	2.09057
tead1a	M09437_2.00	chr13:6032598-6033098	agpat5	0.391962	Inter	0.0915472	tead1a->chr13:6032598-6033098->agpat5	Act	1.61908	0.373527	2.09057
tead1a	M03996_2.00	chr13:6074434-6074934	agpat5	0.38626	Inter	0.0915472	tead1a->chr13:6074434-6074934->agpat5	Act	1.61908	0.373527	0
foxj3	M02855	chr13:6082639-6083139	agpat5	0.0612577	Inter	0.0635842	foxj3->chr13:6082639-6083139->agpat5	Act	0.808686	0.373527	0
fosl2	M01809_2.00	chr13:6082639-6083139	agpat5	0.0742688	Inter	0.0929914	fosl2->chr13:6082639-6083139->agpat5	Act	2.31203	0.373527	0
esr2a	M01297_2.00	chr13:6083546-6084046	agpat5	0.100078	Inter	0.0726945	esr2a->chr13:6083546-6084046->agpat5	Act	1.11001	0.373527	0.953823
esr2a	M01297_2.00	chr13:6084143-6084643	agpat5	0.100078	Inter	0.0726945	esr2a->chr13:6084143-6084643->agpat5	Act	1.11001	0.373527	0
foxj3	M01987_2.00	chr13:6084143-6084643	agpat5	0.0790124	Inter	0.0635842	foxj3->chr13:6084143-6084643->agpat5	Act	0.808686	0.373527	0
rfx2	M11247_2.00	chr13:6084143-6084643	agpat5	0.320917	Inter	0.102237	rfx2->chr13:6084143-6084643->agpat5	Act	1.13253	0.373527	0
fosl2	M00926	chr13:6099477-6099977	agpat5	0.528779	Inter	0.0929914	fosl2->chr13:6099477-6099977->agpat5	Act	2.31203	0.373527	4.79503
tcf7l1a	M01594	chr13:6145203-6145703	agpat5	0.328895	Inter	0.0882796	tcf7l1a->chr13:6145203-6145703->agpat5	Act	0.749125	0.373527	3.82919
fosl2	M03870	chr13:6145203-6145703	agpat5	0.542626	Inter	0.0929914	fosl2->chr13:6145203-6145703->agpat5	Act	2.31203	0.373527	3.82919
foxn4	M04645	chr13:6145203-6145703	agpat5	0.110591	Inter	0.0874491	foxn4->chr13:6145203-6145703->agpat5	Act	1.98217	0.373527	3.82919
esr2a	M09604_2.00	chr13:6178720-6179220	agpat5	0.0823319	Inter	0.0726945	esr2a->chr13:6178720-6179220->agpat5	Act	1.11001	0.373527	2.29442
mybl1	M10297	chr13:6279461-6279961	agpat5	0.315136	TSS	0.0973393	mybl1->chr13:6279461-6279961->agpat5	Act	1.69618	0.373527	0
rfx2	M08600_2.00	chr13:6279461-6279961	agpat5	0.314992	TSS	0.102237	rfx2->chr13:6279461-6279961->agpat5	Act	1.13253	0.373527	0
gli2a	M05331	chr21:11138560-11139060	agxt2	0.0593127	TSS	0.229769	gli2a->chr21:11138560-11139060->agxt2	Act	2.41799	0.479278	0
stat3	M00223	chr4:5056369-5056869	ahcyl2b	0.269873	Body	0.121194	stat3->chr4:5056369-5056869->ahcyl2b	Act	1.70202	0.588429	0
erfl3	M02967_2.00	chr4:5056369-5056869	ahcyl2b	0.0938034	Body	0.103755	erfl3->chr4:5056369-5056869->ahcyl2b	Act	1.01761	0.588429	0
runx1	M00271	chr4:4857369-4857869	ahcyl2b	0.148862	Inter	0.0906379	runx1->chr4:4857369-4857869->ahcyl2b	Act	1.51009	0.588429	0
erfl3	M09058_2.00	chr4:5091445-5091945	ahcyl2b	0.365279	TSS	0.103755	erfl3->chr4:5091445-5091945->ahcyl2b	Act	1.01761	0.588429	0
erfl3	M09058_2.00	chr4:5091991-5092491	ahcyl2b	0.365279	TSS	0.103755	erfl3->chr4:5091991-5092491->ahcyl2b	Act	1.01761	0.588429	0
rarga	M03562	chr14:26759054-26759554	ahnak	0.0655841	Body	0.33506	rarga->chr14:26759054-26759554->ahnak	Act	0.588239	1.08837	2.65288
sox8a	M03518_2.00	chr14:26759054-26759554	ahnak	0.116378	Body	0.304864	sox8a->chr14:26759054-26759554->ahnak	Act	1.14831	1.08837	2.65288
sox13	M03518_2.00	chr14:26759054-26759554	ahnak	0.165621	Body	0.371305	sox13->chr14:26759054-26759554->ahnak	Act	1.40426	1.08837	2.65288
runx1	M09631_2.00	chr14:26759054-26759554	ahnak	0.200077	Body	0.170884	runx1->chr14:26759054-26759554->ahnak	Act	1.51009	1.08837	2.65288
sox8a	M01026_2.00	chr14:26759585-26760085	ahnak	0.365741	Body	0.304864	sox8a->chr14:26759585-26760085->ahnak	Act	1.14831	1.08837	0
sox13	M01026_2.00	chr14:26759585-26760085	ahnak	0.499614	Body	0.371305	sox13->chr14:26759585-26760085->ahnak	Act	1.40426	1.08837	0
runx1	M00769	chr14:26552863-26553363	ahnak	0.224373	Inter	0.170884	runx1->chr14:26552863-26553363->ahnak	Act	1.51009	1.08837	4.02041
sox8a	M04546	chr14:26733816-26734316	ahnak	0.229255	Inter	0.304864	sox8a->chr14:26733816-26734316->ahnak	Act	1.14831	1.08837	0
sox13	M03488_2.00	chr14:26733816-26734316	ahnak	0.240095	Inter	0.371305	sox13->chr14:26733816-26734316->ahnak	Act	1.40426	1.08837	0
runx1	M00271	chr14:26740929-26741429	ahnak	0.148862	Inter	0.170884	runx1->chr14:26740929-26741429->ahnak	Act	1.51009	1.08837	2.7421
rarga	M02705_2.00	chr14:26740929-26741429	ahnak	0.12428	Inter	0.33506	rarga->chr14:26740929-26741429->ahnak	Act	0.588239	1.08837	2.7421
sox8a	M00197_2.00	chr14:26746915-26747415	ahnak	0.294131	Inter	0.304864	sox8a->chr14:26746915-26747415->ahnak	Act	1.14831	1.08837	3.899
sox13	M00197_2.00	chr14:26746915-26747415	ahnak	0.391172	Inter	0.371305	sox13->chr14:26746915-26747415->ahnak	Act	1.40426	1.08837	3.899
sox8a	M01014	chr14:26972909-26973409	ahnak	0.328759	Inter	0.304864	sox8a->chr14:26972909-26973409->ahnak	Act	1.14831	1.08837	0
sox13	M01014	chr14:26972909-26973409	ahnak	0.447704	Inter	0.371305	sox13->chr14:26972909-26973409->ahnak	Act	1.40426	1.08837	0
tcf7l1b	M04005	chr22:13136037-13136537	ahr2	0.0980496	Body	0.182549	tcf7l1b->chr22:13136037-13136537->ahr2	Act	0.336061	0.792587	5.40382
mybl1	M00180_2.00	chr22:13136037-13136537	ahr2	0.251215	Body	0.107252	mybl1->chr22:13136037-13136537->ahr2	Act	1.69618	0.792587	5.40382
mybl1	M11050_2.00	chr22:13136761-13137261	ahr2	0.304592	Body	0.107252	mybl1->chr22:13136761-13137261->ahr2	Act	1.69618	0.792587	2.087
rarga	M11183_2.00	chr22:13139818-13140318	ahr2	0.121386	Body	0.228409	rarga->chr22:13139818-13140318->ahr2	Act	0.588239	0.792587	4.95988
sox13	M09787	chr22:13163404-13163904	ahr2	0.552681	Body	0.333418	sox13->chr22:13163404-13163904->ahr2	Act	1.40426	0.792587	3.00775
sox2	M10067	chr22:13163404-13163904	ahr2	0.445195	Body	0.239547	sox2->chr22:13163404-13163904->ahr2	Act	0.777717	0.792587	3.00775
rarga	M00820_2.00	chr22:13163404-13163904	ahr2	0.114095	Body	0.228409	rarga->chr22:13163404-13163904->ahr2	Act	0.588239	0.792587	3.00775
mybl1	M08890	chr22:12950294-12950794	ahr2	0.112543	Inter	0.107252	mybl1->chr22:12950294-12950794->ahr2	Act	1.69618	0.792587	4.28981
sox13	M03504_2.00	chr22:12950294-12950794	ahr2	0.0542881	Inter	0.333418	sox13->chr22:12950294-12950794->ahr2	Act	1.40426	0.792587	4.28981
gli3	M01704	chr22:12985372-12985872	ahr2	0.068013	Inter	0.299155	gli3->chr22:12985372-12985872->ahr2	Act	0.96568	0.792587	0
gli2a	M02641_2.00	chr22:12985372-12985872	ahr2	0.0629451	Inter	0.401884	gli2a->chr22:12985372-12985872->ahr2	Act	2.41799	0.792587	0
sox2	M02718_2.00	chr22:13034305-13034805	ahr2	0.315402	Inter	0.239547	sox2->chr22:13034305-13034805->ahr2	Act	0.777717	0.792587	1.72005
sox13	M02718_2.00	chr22:13034305-13034805	ahr2	0.382777	Inter	0.333418	sox13->chr22:13034305-13034805->ahr2	Act	1.40426	0.792587	1.72005
rarga	M05623_2.00	chr22:13034305-13034805	ahr2	0.0510327	Inter	0.228409	rarga->chr22:13034305-13034805->ahr2	Act	0.588239	0.792587	1.72005
sox2	M08584	chr22:13038403-13038903	ahr2	0.146872	Inter	0.239547	sox2->chr22:13038403-13038903->ahr2	Act	0.777717	0.792587	0
mybl1	M10297	chr22:13038403-13038903	ahr2	0.315136	Inter	0.107252	mybl1->chr22:13038403-13038903->ahr2	Act	1.69618	0.792587	0
runx1	M00271	chr22:13363024-13363524	ahr2	0.148862	Inter	0.165757	runx1->chr22:13363024-13363524->ahr2	Act	1.51009	0.792587	3.27045
gli3	M01704	chr22:13363024-13363524	ahr2	0.068013	Inter	0.299155	gli3->chr22:13363024-13363524->ahr2	Act	0.96568	0.792587	3.27045
tead1a	M03996_2.00	chr22:13363024-13363524	ahr2	0.38626	Inter	0.255849	tead1a->chr22:13363024-13363524->ahr2	Act	1.61908	0.792587	3.27045
rarga	M11183_2.00	chr22:13363024-13363524	ahr2	0.121386	Inter	0.228409	rarga->chr22:13363024-13363524->ahr2	Act	0.588239	0.792587	3.27045
hlfa	M00260	chr22:13164609-13165109	ahr2	0.245076	TSS	0.170428	hlfa->chr22:13164609-13165109->ahr2	Act	0.589804	0.792587	1.67724
stat3	M01595	chr22:13164609-13165109	ahr2	0.36922	TSS	0.270285	stat3->chr22:13164609-13165109->ahr2	Act	1.70202	0.792587	1.67724
sox2	M02246	chr22:13164609-13165109	ahr2	0.217687	TSS	0.239547	sox2->chr22:13164609-13165109->ahr2	Act	0.777717	0.792587	1.67724
mybl1	M04042	chr22:13164609-13165109	ahr2	0.0789454	TSS	0.107252	mybl1->chr22:13164609-13165109->ahr2	Act	1.69618	0.792587	1.67724
sox13	M00205_2.00	chr22:13164609-13165109	ahr2	0.377959	TSS	0.333418	sox13->chr22:13164609-13165109->ahr2	Act	1.40426	0.792587	1.67724
tcf7l1b	M00712_2.00	chr22:13164609-13165109	ahr2	0.318582	TSS	0.182549	tcf7l1b->chr22:13164609-13165109->ahr2	Act	0.336061	0.792587	1.67724
runx1	M07242	chr15:30836650-30837150	akap1b	0.121344	Body	0.0893542	runx1->chr15:30836650-30837150->akap1b	Act	1.51009	0.379837	0
rfx2	M00975	chr15:30852557-30853057	akap1b	0.200446	Body	0.0733458	rfx2->chr15:30852557-30853057->akap1b	Act	1.13253	0.379837	3.52767
zic2b	M00137_2.00	chr15:30852557-30853057	akap1b	0.187975	Body	0.105415	zic2b->chr15:30852557-30853057->akap1b	Act	1.25359	0.379837	3.52767
mybl1	M08150_2.00	chr15:30852557-30853057	akap1b	0.130889	Body	0.12604	mybl1->chr15:30852557-30853057->akap1b	Act	1.69618	0.379837	3.52767
runx1	M09631_2.00	chr15:30852557-30853057	akap1b	0.200077	Body	0.0893542	runx1->chr15:30852557-30853057->akap1b	Act	1.51009	0.379837	3.52767
esr2a	M09291_2.00	chr15:30676656-30677156	akap1b	0.0889213	Inter	0.0910915	esr2a->chr15:30676656-30677156->akap1b	Act	1.11001	0.379837	0.854207
runx1	M09631_2.00	chr15:30676656-30677156	akap1b	0.200077	Inter	0.0893542	runx1->chr15:30676656-30677156->akap1b	Act	1.51009	0.379837	0.854207
mybl1	M09601_2.00	chr15:30695598-30696098	akap1b	0.322532	Inter	0.12604	mybl1->chr15:30695598-30696098->akap1b	Act	1.69618	0.379837	1.77296
junbb	M08945	chr15:30700658-30701158	akap1b	0.1653	Inter	0.0829105	junbb->chr15:30700658-30701158->akap1b	Act	0.837658	0.379837	3.98964
ascl1a	M09767	chr15:30700658-30701158	akap1b	0.0649742	Inter	0.107623	ascl1a->chr15:30700658-30701158->akap1b	Act	0.683363	0.379837	3.98964
zic2b	M00137_2.00	chr15:30700658-30701158	akap1b	0.187975	Inter	0.105415	zic2b->chr15:30700658-30701158->akap1b	Act	1.25359	0.379837	3.98964
ascl1a	M09767	chr15:30735751-30736251	akap1b	0.0649742	Inter	0.107623	ascl1a->chr15:30735751-30736251->akap1b	Act	0.683363	0.379837	4.54205
rfx2	M10355	chr15:30735751-30736251	akap1b	0.355069	Inter	0.0733458	rfx2->chr15:30735751-30736251->akap1b	Act	1.13253	0.379837	4.54205
zic2b	M02893_2.00	chr15:30735751-30736251	akap1b	0.185492	Inter	0.105415	zic2b->chr15:30735751-30736251->akap1b	Act	1.25359	0.379837	4.54205
runx1	M09631_2.00	chr15:30735751-30736251	akap1b	0.200077	Inter	0.0893542	runx1->chr15:30735751-30736251->akap1b	Act	1.51009	0.379837	4.54205
mybl1	M04045	chr15:30857130-30857630	akap1b	0.0940949	TSS	0.12604	mybl1->chr15:30857130-30857630->akap1b	Act	1.69618	0.379837	0
foxj1a	M00161_2.00	chr15:30857130-30857630	akap1b	0.0958091	TSS	0.0726184	foxj1a->chr15:30857130-30857630->akap1b	Act	0.670268	0.379837	0
zic2b	M04491_2.00	chr15:30857130-30857630	akap1b	0.187725	TSS	0.105415	zic2b->chr15:30857130-30857630->akap1b	Act	1.25359	0.379837	0
esr2a	M09303_2.00	chr15:30857130-30857630	akap1b	0.0646678	TSS	0.0910915	esr2a->chr15:30857130-30857630->akap1b	Act	1.11001	0.379837	0
rfx2	M09363_2.00	chr15:30857130-30857630	akap1b	0.347511	TSS	0.0733458	rfx2->chr15:30857130-30857630->akap1b	Act	1.13253	0.379837	0
sox2	M03492_2.00	chr20:45945579-45946079	AL929237.3	0.161162	Inter	0.096785	sox2->chr20:45945579-45946079->AL929237.3	Act	0.777717	0.49626	0
sox8a	M03492_2.00	chr20:45945579-45946079	AL929237.3	0.173129	Inter	0.183177	sox8a->chr20:45945579-45946079->AL929237.3	Act	1.14831	0.49626	0
sox13	M03492_2.00	chr20:45945579-45946079	AL929237.3	0.210753	Inter	0.164183	sox13->chr20:45945579-45946079->AL929237.3	Act	1.40426	0.49626	0
stat3	M08015_2.00	chr20:45945579-45946079	AL929237.3	0.179851	Inter	0.13434	stat3->chr20:45945579-45946079->AL929237.3	Act	1.70202	0.49626	0
sox8a	M02912	chr20:45979668-45980168	AL929237.3	0.0695312	Inter	0.183177	sox8a->chr20:45979668-45980168->AL929237.3	Act	1.14831	0.49626	0
sox13	M03504_2.00	chr20:45979668-45980168	AL929237.3	0.0542881	Inter	0.164183	sox13->chr20:45979668-45980168->AL929237.3	Act	1.40426	0.49626	0
sox2	M05759_2.00	chr20:45979668-45980168	AL929237.3	0.340395	Inter	0.096785	sox2->chr20:45979668-45980168->AL929237.3	Act	0.777717	0.49626	0
sox8a	M02719_2.00	chr20:45983130-45983630	AL929237.3	0.403529	Inter	0.183177	sox8a->chr20:45983130-45983630->AL929237.3	Act	1.14831	0.49626	0
sox2	M02719_2.00	chr20:45983130-45983630	AL929237.3	0.410213	Inter	0.096785	sox2->chr20:45983130-45983630->AL929237.3	Act	0.777717	0.49626	0
sox13	M02719_2.00	chr20:45983130-45983630	AL929237.3	0.532837	Inter	0.164183	sox13->chr20:45983130-45983630->AL929237.3	Act	1.40426	0.49626	0
tead1a	M03576_2.00	chr12:30788352-30788852	aldh18a1	0.401935	TSS	0.0737728	tead1a->chr12:30788352-30788852->aldh18a1	Act	1.61908	0.420046	0
gli2a	M02641_2.00	chr7:30367340-30367840	aldh1a2	0.0629451	Body	0.285554	gli2a->chr7:30367340-30367840->aldh1a2	Act	2.41799	1.08199	4.52364
stat3	M01220	chr7:30232002-30232502	aldh1a2	0.281591	Inter	0.223321	stat3->chr7:30232002-30232502->aldh1a2	Act	1.70202	1.08199	1.94714
sox8a	M05753_2.00	chr7:9971233-9971733	aldh1a3	0.41249	Inter	0.254827	sox8a->chr7:9971233-9971733->aldh1a3	Act	1.14831	0.860737	0
sox13	M05753_2.00	chr7:9971233-9971733	aldh1a3	0.521999	Inter	0.259876	sox13->chr7:9971233-9971733->aldh1a3	Act	1.40426	0.860737	0
nfixa	M04058	chr7:9971978-9972478	aldh1a3	0.287683	Inter	0.204265	nfixa->chr7:9971978-9972478->aldh1a3	Act	2.03913	0.860737	0
stat3	M00223	chr7:9975330-9975830	aldh1a3	0.269873	Inter	0.220806	stat3->chr7:9975330-9975830->aldh1a3	Act	1.70202	0.860737	0
nfixa	M02050	chr7:9975330-9975830	aldh1a3	0.288932	Inter	0.204265	nfixa->chr7:9975330-9975830->aldh1a3	Act	2.03913	0.860737	0
nfixa	M00193	chr7:39161860-39162360	ambra1a	0.247962	Inter	0.0614068	nfixa->chr7:39161860-39162360->ambra1a	Act	2.03913	0.39154	2.52073
nfixa	M00056	chr7:39359857-39360357	ambra1a	0.0775753	TSS	0.0614068	nfixa->chr7:39359857-39360357->ambra1a	Act	2.03913	0.39154	0
foxj3	M09094_2.00	chr7:39359857-39360357	ambra1a	0.0542933	TSS	0.0450492	foxj3->chr7:39359857-39360357->ambra1a	Act	0.808686	0.39154	0
foxj3	M04274	chr7:39360502-39361002	ambra1a	0.0564284	TSS	0.0450492	foxj3->chr7:39360502-39361002->ambra1a	Act	0.808686	0.39154	0
mybl1	M11050_2.00	chr7:39360502-39361002	ambra1a	0.304592	TSS	0.0682234	mybl1->chr7:39360502-39361002->ambra1a	Act	1.69618	0.39154	0
sox8a	M04547	chr21:37478349-37478849	amot	0.145362	Body	0.424927	sox8a->chr21:37478349-37478849->amot	Act	1.14831	1.11613	3.02823
gli2a	M05331	chr21:37478349-37478849	amot	0.0593127	Body	0.589297	gli2a->chr21:37478349-37478849->amot	Act	2.41799	1.11613	3.02823
sox2	M03489_2.00	chr21:37478349-37478849	amot	0.149626	Body	0.346993	sox2->chr21:37478349-37478849->amot	Act	0.777717	1.11613	3.02823
sox13	M03489_2.00	chr21:37478349-37478849	amot	0.175082	Body	0.529434	sox13->chr21:37478349-37478849->amot	Act	1.40426	1.11613	3.02823
tead1a	M03576_2.00	chr21:37478349-37478849	amot	0.401935	Body	0.323802	tead1a->chr21:37478349-37478849->amot	Act	1.61908	1.11613	3.02823
erfl3	M04753_2.00	chr21:37478349-37478849	amot	0.140988	Body	0.270992	erfl3->chr21:37478349-37478849->amot	Act	1.01761	1.11613	3.02823
rarga	M05606_2.00	chr21:37478349-37478849	amot	0.0624392	Body	0.406026	rarga->chr21:37478349-37478849->amot	Act	0.588239	1.11613	3.02823
runx1	M09631_2.00	chr21:37478349-37478849	amot	0.200077	Body	0.193511	runx1->chr21:37478349-37478849->amot	Act	1.51009	1.11613	3.02823
stat3	M01595	chr21:37492336-37492836	amot	0.36922	Body	0.394668	stat3->chr21:37492336-37492836->amot	Act	1.70202	1.11613	3.48224
tead1a	M04141	chr21:37492336-37492836	amot	0.373323	Body	0.323802	tead1a->chr21:37492336-37492836->amot	Act	1.61908	1.11613	3.48224
runx1	M00271	chr21:37529899-37530399	amot	0.148862	Body	0.193511	runx1->chr21:37529899-37530399->amot	Act	1.51009	1.11613	3.91191
rarga	M03394_2.00	chr21:37529899-37530399	amot	0.0508909	Body	0.406026	rarga->chr21:37529899-37530399->amot	Act	0.588239	1.11613	3.91191
nfic	M03475_2.00	chr21:37529899-37530399	amot	0.409764	Body	0.379667	nfic->chr21:37529899-37530399->amot	Act	2.75632	1.11613	3.91191
sox2	M03529_2.00	chr21:37529899-37530399	amot	0.233463	Body	0.346993	sox2->chr21:37529899-37530399->amot	Act	0.777717	1.11613	3.91191
sox8a	M03529_2.00	chr21:37529899-37530399	amot	0.245247	Body	0.424927	sox8a->chr21:37529899-37530399->amot	Act	1.14831	1.11613	3.91191
sox13	M03529_2.00	chr21:37529899-37530399	amot	0.320441	Body	0.529434	sox13->chr21:37529899-37530399->amot	Act	1.40426	1.11613	3.91191
runx1	M00271	chr21:37530474-37530974	amot	0.148862	Body	0.193511	runx1->chr21:37530474-37530974->amot	Act	1.51009	1.11613	3.84801
stat3	M01220	chr21:37530474-37530974	amot	0.281591	Body	0.394668	stat3->chr21:37530474-37530974->amot	Act	1.70202	1.11613	3.84801
sox2	M02246	chr21:37530474-37530974	amot	0.217687	Body	0.346993	sox2->chr21:37530474-37530974->amot	Act	0.777717	1.11613	3.84801
rarga	M03562	chr21:37530474-37530974	amot	0.0655841	Body	0.406026	rarga->chr21:37530474-37530974->amot	Act	0.588239	1.11613	3.84801
nfic	M03475_2.00	chr21:37530474-37530974	amot	0.409764	Body	0.379667	nfic->chr21:37530474-37530974->amot	Act	2.75632	1.11613	3.84801
sox8a	M03529_2.00	chr21:37530474-37530974	amot	0.245247	Body	0.424927	sox8a->chr21:37530474-37530974->amot	Act	1.14831	1.11613	3.84801
sox13	M03529_2.00	chr21:37530474-37530974	amot	0.320441	Body	0.529434	sox13->chr21:37530474-37530974->amot	Act	1.40426	1.11613	3.84801
sox2	M03505_2.00	chr21:37352152-37352652	amot	0.194612	Inter	0.346993	sox2->chr21:37352152-37352652->amot	Act	0.777717	1.11613	0
sox8a	M03505_2.00	chr21:37352152-37352652	amot	0.213624	Inter	0.424927	sox8a->chr21:37352152-37352652->amot	Act	1.14831	1.11613	0
sox13	M03505_2.00	chr21:37352152-37352652	amot	0.27307	Inter	0.529434	sox13->chr21:37352152-37352652->amot	Act	1.40426	1.11613	0
sox2	M03505_2.00	chr21:37352927-37353427	amot	0.194612	Inter	0.346993	sox2->chr21:37352927-37353427->amot	Act	0.777717	1.11613	0
sox8a	M03505_2.00	chr21:37352927-37353427	amot	0.213624	Inter	0.424927	sox8a->chr21:37352927-37353427->amot	Act	1.14831	1.11613	0
sox13	M03505_2.00	chr21:37352927-37353427	amot	0.27307	Inter	0.529434	sox13->chr21:37352927-37353427->amot	Act	1.40426	1.11613	0
nfic	M09378_2.00	chr21:37352927-37353427	amot	0.427033	Inter	0.379667	nfic->chr21:37352927-37353427->amot	Act	2.75632	1.11613	0
nfic	M09378_2.00	chr21:37353483-37353983	amot	0.427033	Inter	0.379667	nfic->chr21:37353483-37353983->amot	Act	2.75632	1.11613	0
tead1a	M04142	chr21:37447139-37447639	amot	0.149864	Inter	0.323802	tead1a->chr21:37447139-37447639->amot	Act	1.61908	1.11613	0
runx1	M03466_2.00	chr21:37447139-37447639	amot	0.0867215	Inter	0.193511	runx1->chr21:37447139-37447639->amot	Act	1.51009	1.11613	0
sox2	M03494_2.00	chr21:37447139-37447639	amot	0.0696788	Inter	0.346993	sox2->chr21:37447139-37447639->amot	Act	0.777717	1.11613	0
sox13	M03494_2.00	chr21:37447139-37447639	amot	0.0812946	Inter	0.529434	sox13->chr21:37447139-37447639->amot	Act	1.40426	1.11613	0
mybl1	M05608	chr21:37461243-37461743	amot	0.0584619	Inter	0.0631384	mybl1->chr21:37461243-37461743->amot	Act	1.69618	1.11613	0
nfic	M09815	chr21:37461243-37461743	amot	0.368835	Inter	0.379667	nfic->chr21:37461243-37461743->amot	Act	2.75632	1.11613	0
sox8a	M05765_2.00	chr21:37461243-37461743	amot	0.406229	Inter	0.424927	sox8a->chr21:37461243-37461743->amot	Act	1.14831	1.11613	0
sox2	M05765_2.00	chr21:37461243-37461743	amot	0.42428	Inter	0.346993	sox2->chr21:37461243-37461743->amot	Act	0.777717	1.11613	0
sox13	M05765_2.00	chr21:37461243-37461743	amot	0.546137	Inter	0.529434	sox13->chr21:37461243-37461743->amot	Act	1.40426	1.11613	0
sox2	M03492_2.00	chr21:37618383-37618883	amot	0.161162	Inter	0.346993	sox2->chr21:37618383-37618883->amot	Act	0.777717	1.11613	3.88853
sox8a	M03492_2.00	chr21:37618383-37618883	amot	0.173129	Inter	0.424927	sox8a->chr21:37618383-37618883->amot	Act	1.14831	1.11613	3.88853
sox13	M03492_2.00	chr21:37618383-37618883	amot	0.210753	Inter	0.529434	sox13->chr21:37618383-37618883->amot	Act	1.40426	1.11613	3.88853
runx1	M00271	chr21:37621619-37622119	amot	0.148862	Inter	0.193511	runx1->chr21:37621619-37622119->amot	Act	1.51009	1.11613	0
sox8a	M00213_2.00	chr21:37621619-37622119	amot	0.362965	Inter	0.424927	sox8a->chr21:37621619-37622119->amot	Act	1.14831	1.11613	0
sox2	M00213_2.00	chr21:37621619-37622119	amot	0.382499	Inter	0.346993	sox2->chr21:37621619-37622119->amot	Act	0.777717	1.11613	0
sox13	M00213_2.00	chr21:37621619-37622119	amot	0.486407	Inter	0.529434	sox13->chr21:37621619-37622119->amot	Act	1.40426	1.11613	0
sox2	M04539	chr21:37622274-37622774	amot	0.170095	Inter	0.346993	sox2->chr21:37622274-37622774->amot	Act	0.777717	1.11613	3.26814
sox8a	M03505_2.00	chr21:37622274-37622774	amot	0.213624	Inter	0.424927	sox8a->chr21:37622274-37622774->amot	Act	1.14831	1.11613	3.26814
sox13	M03505_2.00	chr21:37622274-37622774	amot	0.27307	Inter	0.529434	sox13->chr21:37622274-37622774->amot	Act	1.40426	1.11613	3.26814
tead1a	M03576_2.00	chr21:37622274-37622774	amot	0.401935	Inter	0.323802	tead1a->chr21:37622274-37622774->amot	Act	1.61908	1.11613	3.26814
erfl3	M04709_2.00	chr21:37622274-37622774	amot	0.198175	Inter	0.270992	erfl3->chr21:37622274-37622774->amot	Act	1.01761	1.11613	3.26814
rarga	M00820_2.00	chr21:37624672-37625172	amot	0.114095	Inter	0.406026	rarga->chr21:37624672-37625172->amot	Act	0.588239	1.11613	4.93783
erfl3	M01477_2.00	chr21:37624672-37625172	amot	0.101798	Inter	0.270992	erfl3->chr21:37624672-37625172->amot	Act	1.01761	1.11613	4.93783
erfl3	M00157_2.00	chr21:37634835-37635335	amot	0.0643942	Inter	0.270992	erfl3->chr21:37634835-37635335->amot	Act	1.01761	1.11613	0
sox2	M05759_2.00	chr21:37477081-37477581	amot	0.340395	TSS	0.346993	sox2->chr21:37477081-37477581->amot	Act	0.777717	1.11613	0
sox8a	M05759_2.00	chr21:37477081-37477581	amot	0.383271	TSS	0.424927	sox8a->chr21:37477081-37477581->amot	Act	1.14831	1.11613	0
sox13	M05759_2.00	chr21:37477081-37477581	amot	0.467712	TSS	0.529434	sox13->chr21:37477081-37477581->amot	Act	1.40426	1.11613	0
erfl3	M09058_2.00	chr21:37477081-37477581	amot	0.365279	TSS	0.270992	erfl3->chr21:37477081-37477581->amot	Act	1.01761	1.11613	0
rarga	M09294_2.00	chr21:37477081-37477581	amot	0.243923	TSS	0.406026	rarga->chr21:37477081-37477581->amot	Act	0.588239	1.11613	0
sox2	M07308	chr22:1236665-1237165	ampd2a	0.328253	Body	0.133889	sox2->chr22:1236665-1237165->ampd2a	Act	0.777717	0.869848	4.35935
sox8a	M03487_2.00	chr22:1247815-1248315	ampd2a	0.0815095	Inter	0.22296	sox8a->chr22:1247815-1248315->ampd2a	Act	1.14831	0.869848	0
sox2	M03487_2.00	chr22:1247815-1248315	ampd2a	0.109219	Inter	0.133889	sox2->chr22:1247815-1248315->ampd2a	Act	0.777717	0.869848	0
sox13	M03487_2.00	chr22:1247815-1248315	ampd2a	0.137222	Inter	0.208138	sox13->chr22:1247815-1248315->ampd2a	Act	1.40426	0.869848	0
sox2	M07308	chr22:1236046-1236546	ampd2a	0.328253	TSS	0.133889	sox2->chr22:1236046-1236546->ampd2a	Act	0.777717	0.869848	3.70483
rarga	M05606_2.00	chr22:1236046-1236546	ampd2a	0.0624392	TSS	0.189572	rarga->chr22:1236046-1236546->ampd2a	Act	0.588239	0.869848	3.70483
sox2	M07225	chr19:46943537-46944037	angpt1	0.414659	Body	0.382036	sox2->chr19:46943537-46944037->angpt1	Act	0.777717	1.26803	0
sox8a	M01026_2.00	chr19:46943537-46944037	angpt1	0.365741	Body	0.420665	sox8a->chr19:46943537-46944037->angpt1	Act	1.14831	1.26803	0
sox13	M01026_2.00	chr19:46943537-46944037	angpt1	0.499614	Body	0.56083	sox13->chr19:46943537-46944037->angpt1	Act	1.40426	1.26803	0
nfixa	M09381_2.00	chr19:46957354-46957854	angpt1	0.281924	Body	0.338434	nfixa->chr19:46957354-46957854->angpt1	Act	2.03913	1.26803	3.84349
nfic	M09381_2.00	chr19:46957354-46957854	angpt1	0.380148	Body	0.410627	nfic->chr19:46957354-46957854->angpt1	Act	2.75632	1.26803	3.84349
tead1a	M03995_2.00	chr19:46957922-46958422	angpt1	0.397303	Body	0.346197	tead1a->chr19:46957922-46958422->angpt1	Act	1.61908	1.26803	3.56825
rarga	M09313_2.00	chr19:46957922-46958422	angpt1	0.344843	Body	0.386273	rarga->chr19:46957922-46958422->angpt1	Act	0.588239	1.26803	3.56825
nfixa	M09381_2.00	chr19:46957922-46958422	angpt1	0.281924	Body	0.338434	nfixa->chr19:46957922-46958422->angpt1	Act	2.03913	1.26803	3.56825
nfic	M09381_2.00	chr19:46957922-46958422	angpt1	0.380148	Body	0.410627	nfic->chr19:46957922-46958422->angpt1	Act	2.75632	1.26803	3.56825
sox2	M11331_2.00	chr19:46957922-46958422	angpt1	0.425179	Body	0.382036	sox2->chr19:46957922-46958422->angpt1	Act	0.777717	1.26803	3.56825
sox8a	M11331_2.00	chr19:46957922-46958422	angpt1	0.448372	Body	0.420665	sox8a->chr19:46957922-46958422->angpt1	Act	1.14831	1.26803	3.56825
sox13	M11331_2.00	chr19:46957922-46958422	angpt1	0.562935	Body	0.56083	sox13->chr19:46957922-46958422->angpt1	Act	1.40426	1.26803	3.56825
tead1a	M03576_2.00	chr19:46806668-46807168	angpt1	0.401935	Inter	0.346197	tead1a->chr19:46806668-46807168->angpt1	Act	1.61908	1.26803	0
nfic	M03476_2.00	chr6:51931985-51932485	angpt4	0.287847	Body	0.384694	nfic->chr6:51931985-51932485->angpt4	Act	2.75632	1.22798	3.20928
sox2	M03495_2.00	chr6:51931985-51932485	angpt4	0.155583	Body	0.392021	sox2->chr6:51931985-51932485->angpt4	Act	0.777717	1.22798	3.20928
sox8a	M03495_2.00	chr6:51931985-51932485	angpt4	0.158582	Body	0.412812	sox8a->chr6:51931985-51932485->angpt4	Act	1.14831	1.22798	3.20928
sox13	M03495_2.00	chr6:51931985-51932485	angpt4	0.212297	Body	0.539884	sox13->chr6:51931985-51932485->angpt4	Act	1.40426	1.22798	3.20928
rarga	M05606_2.00	chr6:51931985-51932485	angpt4	0.0624392	Body	0.414885	rarga->chr6:51931985-51932485->angpt4	Act	0.588239	1.22798	3.20928
stat3	M08015_2.00	chr6:51931985-51932485	angpt4	0.179851	Body	0.453313	stat3->chr6:51931985-51932485->angpt4	Act	1.70202	1.22798	3.20928
runx1	M00271	chr6:52038400-52038900	angpt4	0.148862	Inter	0.249664	runx1->chr6:52038400-52038900->angpt4	Act	1.51009	1.22798	0
mybl1	M04043	chr6:52038400-52038900	angpt4	0.129811	Inter	0.0490565	mybl1->chr6:52038400-52038900->angpt4	Act	1.69618	1.22798	0
sox2	M07308	chr6:52038400-52038900	angpt4	0.328253	Inter	0.392021	sox2->chr6:52038400-52038900->angpt4	Act	0.777717	1.22798	0
tead1a	M03575_2.00	chr6:52038400-52038900	angpt4	0.193302	Inter	0.32733	tead1a->chr6:52038400-52038900->angpt4	Act	1.61908	1.22798	0
rarga	M09278_2.00	chr6:52038400-52038900	angpt4	0.129306	Inter	0.414885	rarga->chr6:52038400-52038900->angpt4	Act	0.588239	1.22798	0
sox8a	M09389_2.00	chr6:52038400-52038900	angpt4	0.504662	Inter	0.412812	sox8a->chr6:52038400-52038900->angpt4	Act	1.14831	1.22798	0
sox13	M09389_2.00	chr6:52038400-52038900	angpt4	0.609713	Inter	0.539884	sox13->chr6:52038400-52038900->angpt4	Act	1.40426	1.22798	0
mybl1	M04043	chr6:52038944-52039444	angpt4	0.129811	Inter	0.0490565	mybl1->chr6:52038944-52039444->angpt4	Act	1.69618	1.22798	0
sox8a	M00201_2.00	chr6:52038944-52039444	angpt4	0.19628	Inter	0.412812	sox8a->chr6:52038944-52039444->angpt4	Act	1.14831	1.22798	0
sox2	M00201_2.00	chr6:52038944-52039444	angpt4	0.229007	Inter	0.392021	sox2->chr6:52038944-52039444->angpt4	Act	0.777717	1.22798	0
sox13	M00201_2.00	chr6:52038944-52039444	angpt4	0.287812	Inter	0.539884	sox13->chr6:52038944-52039444->angpt4	Act	1.40426	1.22798	0
rarga	M09278_2.00	chr6:52038944-52039444	angpt4	0.129306	Inter	0.414885	rarga->chr6:52038944-52039444->angpt4	Act	0.588239	1.22798	0
sox2	M03886	chr6:52124110-52124610	angpt4	0.381104	Inter	0.392021	sox2->chr6:52124110-52124610->angpt4	Act	0.777717	1.22798	0
sox13	M03486_2.00	chr6:52124110-52124610	angpt4	0.0628481	Inter	0.539884	sox13->chr6:52124110-52124610->angpt4	Act	1.40426	1.22798	0
sox8a	M03507_2.00	chr6:52124110-52124610	angpt4	0.0937894	Inter	0.412812	sox8a->chr6:52124110-52124610->angpt4	Act	1.14831	1.22798	0
runx1	M08163_2.00	chr6:52124110-52124610	angpt4	0.252454	Inter	0.249664	runx1->chr6:52124110-52124610->angpt4	Act	1.51009	1.22798	0
gli2a	M02641_2.00	chr8:33019605-33020105	angptl2b	0.0629451	Inter	0.221835	gli2a->chr8:33019605-33020105->angptl2b	Act	2.41799	0.516017	0
rx1	M09180_2.00	chr8:33024771-33025271	angptl2b	0.0640879	Inter	0.107768	rx1->chr8:33024771-33025271->angptl2b	Act	0.850525	0.516017	3.75278
runx1	M01658	chr8:33053994-33054494	angptl2b	0.177853	Inter	0.102456	runx1->chr8:33053994-33054494->angptl2b	Act	1.51009	0.516017	0
rx1	M05038_2.00	chr8:33057801-33058301	angptl2b	0.128489	Inter	0.107768	rx1->chr8:33057801-33058301->angptl2b	Act	0.850525	0.516017	1.69958
nr1i2	M01153	chr8:33201939-33202439	angptl2b	0.14047	Inter	0.117309	nr1i2->chr8:33201939-33202439->angptl2b	Act	0.312797	0.516017	2.96962
runx1	M09631_2.00	chr8:33201939-33202439	angptl2b	0.200077	Inter	0.102456	runx1->chr8:33201939-33202439->angptl2b	Act	1.51009	0.516017	2.96962
tcf3b	M07805_2.00	chr21:26454738-26455238	ankhd1	0.142286	Body	0.0605182	tcf3b->chr21:26454738-26455238->ankhd1	Act	0.685194	0.381884	0
tcf7l1a	M01594	chr21:26465328-26465828	ankhd1	0.328895	Body	0.137958	tcf7l1a->chr21:26465328-26465828->ankhd1	Act	0.749125	0.381884	0
e2f3	M07083	chr21:26465328-26465828	ankhd1	0.161533	Body	0.110655	e2f3->chr21:26465328-26465828->ankhd1	Act	0.665166	0.381884	0
mybl1	M10297	chr21:26465328-26465828	ankhd1	0.315136	Body	0.170173	mybl1->chr21:26465328-26465828->ankhd1	Act	1.69618	0.381884	0
erfl3	M08111_2.00	chr21:26465328-26465828	ankhd1	0.320573	Body	0.118447	erfl3->chr21:26465328-26465828->ankhd1	Act	1.01761	0.381884	0
tcf7l1b	M09392_2.00	chr21:26465328-26465828	ankhd1	0.40907	Body	0.125345	tcf7l1b->chr21:26465328-26465828->ankhd1	Act	0.336061	0.381884	0
fosl2	M08915	chr21:26721859-26722359	ankhd1	0.207604	Inter	0.152509	fosl2->chr21:26721859-26722359->ankhd1	Act	2.31203	0.381884	0
foxp1a	M03053_2.00	chr21:26721859-26722359	ankhd1	0.0664678	Inter	0.0813799	foxp1a->chr21:26721859-26722359->ankhd1	Act	0.748865	0.381884	0
erfl3	M09058_2.00	chr21:26721859-26722359	ankhd1	0.365279	Inter	0.118447	erfl3->chr21:26721859-26722359->ankhd1	Act	1.01761	0.381884	0
olig2	M09703	chr19:43921527-43922027	ankib1a	0.0616604	Body	0.249329	olig2->chr19:43921527-43922027->ankib1a	Act	1.16665	1.0047	4.99505
zic2b	M02940	chr19:43923435-43923935	ankib1a	0.166024	Body	0.251587	zic2b->chr19:43923435-43923935->ankib1a	Act	1.25359	1.0047	1.96597
sox2	M03491_2.00	chr19:43923435-43923935	ankib1a	0.151618	Body	0.22211	sox2->chr19:43923435-43923935->ankib1a	Act	0.777717	1.0047	1.96597
sox13	M03491_2.00	chr19:43923435-43923935	ankib1a	0.210951	Body	0.238052	sox13->chr19:43923435-43923935->ankib1a	Act	1.40426	1.0047	1.96597
tcf7l1a	M00805	chr19:43678547-43679047	ankib1a	0.191918	Inter	0.279186	tcf7l1a->chr19:43678547-43679047->ankib1a	Act	0.749125	1.0047	4.57785
sox2	M09389_2.00	chr19:43678547-43679047	ankib1a	0.446999	Inter	0.22211	sox2->chr19:43678547-43679047->ankib1a	Act	0.777717	1.0047	4.57785
sox13	M09389_2.00	chr19:43678547-43679047	ankib1a	0.609713	Inter	0.238052	sox13->chr19:43678547-43679047->ankib1a	Act	1.40426	1.0047	4.57785
zic2b	M02940	chr19:43681031-43681531	ankib1a	0.166024	Inter	0.251587	zic2b->chr19:43681031-43681531->ankib1a	Act	1.25359	1.0047	2.10673
ascl1a	M08744_2.00	chr19:43681031-43681531	ankib1a	0.0621193	Inter	0.241363	ascl1a->chr19:43681031-43681531->ankib1a	Act	0.683363	1.0047	2.10673
zic2b	M04491_2.00	chr19:44036344-44036844	ankib1a	0.187725	Inter	0.251587	zic2b->chr19:44036344-44036844->ankib1a	Act	1.25359	1.0047	0
mybl1	M04045	chr19:43904749-43905249	ankib1a	0.0940949	TSS	0.298249	mybl1->chr19:43904749-43905249->ankib1a	Act	1.69618	1.0047	0
myb	M09813	chr19:43904749-43905249	ankib1a	0.0902249	TSS	0.233394	myb->chr19:43904749-43905249->ankib1a	Act	1.14685	1.0047	0
zic2b	M00449	chr19:43905388-43905888	ankib1a	0.11356	TSS	0.251587	zic2b->chr19:43905388-43905888->ankib1a	Act	1.25359	1.0047	0
tcf7l1a	M00805	chr19:43905388-43905888	ankib1a	0.191918	TSS	0.279186	tcf7l1a->chr19:43905388-43905888->ankib1a	Act	0.749125	1.0047	0
myb	M09813	chr19:43905388-43905888	ankib1a	0.0902249	TSS	0.233394	myb->chr19:43905388-43905888->ankib1a	Act	1.14685	1.0047	0
sox2	M00197_2.00	chr19:43905388-43905888	ankib1a	0.312264	TSS	0.22211	sox2->chr19:43905388-43905888->ankib1a	Act	0.777717	1.0047	0
sox13	M00197_2.00	chr19:43905388-43905888	ankib1a	0.391172	TSS	0.238052	sox13->chr19:43905388-43905888->ankib1a	Act	1.40426	1.0047	0
mybl1	M08150_2.00	chr19:43905388-43905888	ankib1a	0.130889	TSS	0.298249	mybl1->chr19:43905388-43905888->ankib1a	Act	1.69618	1.0047	0
tcf7l1a	M00805	chr7:56275152-56275652	ankrd11	0.191918	Body	0.163647	tcf7l1a->chr7:56275152-56275652->ankrd11	Act	0.749125	0.486847	3.88529
tcf7l1a	M00805	chr7:56281460-56281960	ankrd11	0.191918	Body	0.163647	tcf7l1a->chr7:56281460-56281960->ankrd11	Act	0.749125	0.486847	1.93462
ascl1a	M09767	chr7:56359635-56360135	ankrd11	0.0649742	Body	0.055082	ascl1a->chr7:56359635-56360135->ankrd11	Act	0.683363	0.486847	1.36699
olig2	M10019	chr7:56359635-56360135	ankrd11	0.108869	Body	0.176554	olig2->chr7:56359635-56360135->ankrd11	Act	1.16665	0.486847	1.36699
olig2	M09703	chr7:56363040-56363540	ankrd11	0.0616604	Body	0.176554	olig2->chr7:56363040-56363540->ankrd11	Act	1.16665	0.486847	0
rfx2	M04096	chr7:56374041-56374541	ankrd11	0.209823	Body	0.0498729	rfx2->chr7:56374041-56374541->ankrd11	Act	1.13253	0.486847	1.19294
ascl1a	M09767	chr7:56374041-56374541	ankrd11	0.0649742	Body	0.055082	ascl1a->chr7:56374041-56374541->ankrd11	Act	0.683363	0.486847	1.19294
tcf7l1a	M10400	chr7:56387081-56387581	ankrd11	0.0747388	Body	0.163647	tcf7l1a->chr7:56387081-56387581->ankrd11	Act	0.749125	0.486847	1.19634
ascl1a	M09767	chr7:56391617-56392117	ankrd11	0.0649742	Body	0.055082	ascl1a->chr7:56391617-56392117->ankrd11	Act	0.683363	0.486847	0
tcf7l1a	M00805	chr7:56079213-56079713	ankrd11	0.191918	Inter	0.163647	tcf7l1a->chr7:56079213-56079713->ankrd11	Act	0.749125	0.486847	0
tcf7l1a	M00805	chr7:56082522-56083022	ankrd11	0.191918	Inter	0.163647	tcf7l1a->chr7:56082522-56083022->ankrd11	Act	0.749125	0.486847	1.68737
rfx2	M04095	chr7:56235942-56236442	ankrd11	0.358754	Inter	0.0498729	rfx2->chr7:56235942-56236442->ankrd11	Act	1.13253	0.486847	1.38509
tcf7l1a	M00712_2.00	chr7:56254191-56254691	ankrd11	0.281625	TSS	0.163647	tcf7l1a->chr7:56254191-56254691->ankrd11	Act	0.749125	0.486847	0
ascl1a	M08730_2.00	chr16:20056365-20056865	ankrd28b	0.0853244	TSS	0.14692	ascl1a->chr16:20056365-20056865->ankrd28b	Act	0.683363	0.500057	0
sox8a	M03542_2.00	chr9:32141660-32142160	ankrd44	0.146348	Body	0.188831	sox8a->chr9:32141660-32142160->ankrd44	Act	1.14831	0.411912	0
nfixa	M02050	chr9:32156106-32156606	ankrd44	0.288932	Body	0.144377	nfixa->chr9:32156106-32156606->ankrd44	Act	2.03913	0.411912	0
nfixa	M02050	chr9:32156613-32157113	ankrd44	0.288932	Body	0.144377	nfixa->chr9:32156613-32157113->ankrd44	Act	2.03913	0.411912	0
rarga	M05883_2.00	chr9:32156613-32157113	ankrd44	0.294205	Body	0.15432	rarga->chr9:32156613-32157113->ankrd44	Act	0.588239	0.411912	0
nfixa	M05741_2.00	chr9:32323792-32324292	ankrd44	0.282626	Inter	0.144377	nfixa->chr9:32323792-32324292->ankrd44	Act	2.03913	0.411912	0
sox8a	M02912	chr9:32158630-32159130	ankrd44	0.0695312	TSS	0.188831	sox8a->chr9:32158630-32159130->ankrd44	Act	1.14831	0.411912	0
myb	M11068_2.00	chr24:37680727-37681227	anks3	0.122782	TSS	0.077531	myb->chr24:37680727-37681227->anks3	Act	1.14685	0.410339	0
gli2a	M02641_2.00	chr24:37681293-37681793	anks3	0.0629451	TSS	0.096437	gli2a->chr24:37681293-37681793->anks3	Act	2.41799	0.410339	2.5225
gli3	M02641_2.00	chr24:37681293-37681793	anks3	0.0729654	TSS	0.0837963	gli3->chr24:37681293-37681793->anks3	Act	0.96568	0.410339	2.5225
sox8a	M03973_2.00	chr3:60826779-60827279	anks4b	0.23967	Body	0.195199	sox8a->chr3:60826779-60827279->anks4b	Act	1.14831	0.376878	3.29865
sox13	M03973_2.00	chr3:60826779-60827279	anks4b	0.3116	Body	0.167347	sox13->chr3:60826779-60827279->anks4b	Act	1.40426	0.376878	3.29865
gli2a	M03902	chr3:60700531-60701031	anks4b	0.260418	Inter	0.207067	gli2a->chr3:60700531-60701031->anks4b	Act	2.41799	0.376878	0
fosl2	M08940	chr9:12884978-12885478	ankzf1	0.546865	Body	0.0383027	fosl2->chr9:12884978-12885478->ankzf1	Act	2.31203	0.351694	2.75531
e2f3	M02962_2.00	chr9:13022844-13023344	ankzf1	0.113959	Inter	0.0411692	e2f3->chr9:13022844-13023344->ankzf1	Act	0.665166	0.351694	4.28036
tead1a	M04142	chr19:35450462-35450962	anln	0.149864	Body	0.147379	tead1a->chr19:35450462-35450962->anln	Act	1.61908	0.456464	0
tead3b	M04143	chr19:35450462-35450962	anln	0.11096	Body	0.181892	tead3b->chr19:35450462-35450962->anln	Act	0.518253	0.456464	0
mybl1	M05608	chr4:1914178-1914678	ano6	0.0584619	Body	0.208151	mybl1->chr4:1914178-1914678->ano6	Act	1.69618	0.744385	0
erf	M00157_2.00	chr4:1914178-1914678	ano6	0.0574328	Body	0.146277	erf->chr4:1914178-1914678->ano6	Act	0.721766	0.744385	0
erfl3	M00157_2.00	chr4:1914178-1914678	ano6	0.0643942	Body	0.173448	erfl3->chr4:1914178-1914678->ano6	Act	1.01761	0.744385	0
sox13	M02488_2.00	chr4:1914178-1914678	ano6	0.329447	Body	0.200272	sox13->chr4:1914178-1914678->ano6	Act	1.40426	0.744385	0
zic2b	M04485_2.00	chr4:1914178-1914678	ano6	0.218906	Body	0.184008	zic2b->chr4:1914178-1914678->ano6	Act	1.25359	0.744385	0
zic2b	M07292	chr4:1674946-1675446	ano6	0.187455	Inter	0.184008	zic2b->chr4:1674946-1675446->ano6	Act	1.25359	0.744385	3.9394
sox13	M08165_2.00	chr4:1702936-1703436	ano6	0.518564	Inter	0.200272	sox13->chr4:1702936-1703436->ano6	Act	1.40426	0.744385	1.87899
erf	M09061_2.00	chr4:1702936-1703436	ano6	0.191975	Inter	0.146277	erf->chr4:1702936-1703436->ano6	Act	0.721766	0.744385	1.87899
erfl3	M09061_2.00	chr4:1702936-1703436	ano6	0.224653	Inter	0.173448	erfl3->chr4:1702936-1703436->ano6	Act	1.01761	0.744385	1.87899
tead1a	M04141	chr4:1706161-1706661	ano6	0.373323	Inter	0.231441	tead1a->chr4:1706161-1706661->ano6	Act	1.61908	0.744385	2.14817
nfic	M03479_2.00	chr4:1706161-1706661	ano6	0.406484	Inter	0.173817	nfic->chr4:1706161-1706661->ano6	Act	2.75632	0.744385	2.14817
sox13	M03526_2.00	chr4:1706161-1706661	ano6	0.174173	Inter	0.200272	sox13->chr4:1706161-1706661->ano6	Act	1.40426	0.744385	2.14817
erf	M04729_2.00	chr4:1706161-1706661	ano6	0.0538826	Inter	0.146277	erf->chr4:1706161-1706661->ano6	Act	0.721766	0.744385	2.14817
erfl3	M09058_2.00	chr4:1706161-1706661	ano6	0.365279	Inter	0.173448	erfl3->chr4:1706161-1706661->ano6	Act	1.01761	0.744385	2.14817
tcf7l1a	M00712_2.00	chr4:2064509-2065009	ano6	0.281625	Inter	0.191285	tcf7l1a->chr4:2064509-2065009->ano6	Act	0.749125	0.744385	0
tcf7l1b	M00712_2.00	chr4:2064509-2065009	ano6	0.318582	Inter	0.225037	tcf7l1b->chr4:2064509-2065009->ano6	Act	0.336061	0.744385	0
erf	M08111_2.00	chr4:2064509-2065009	ano6	0.257322	Inter	0.146277	erf->chr4:2064509-2065009->ano6	Act	0.721766	0.744385	0
erfl3	M08111_2.00	chr4:2064509-2065009	ano6	0.320573	Inter	0.173448	erfl3->chr4:2064509-2065009->ano6	Act	1.01761	0.744385	0
tead1a	M09438_2.00	chr4:2064509-2065009	ano6	0.370085	Inter	0.231441	tead1a->chr4:2064509-2065009->ano6	Act	1.61908	0.744385	0
rfx2	M04096	chr4:2073936-2074436	ano6	0.209823	Inter	0.177772	rfx2->chr4:2073936-2074436->ano6	Act	1.13253	0.744385	0
sox13	M03508_2.00	chr4:2073936-2074436	ano6	0.325577	Inter	0.200272	sox13->chr4:2073936-2074436->ano6	Act	1.40426	0.744385	0
rarga	M05680_2.00	chr13:16279629-16280129	anxa11a	0.116622	Body	0.19001	rarga->chr13:16279629-16280129->anxa11a	Act	0.588239	0.376195	2.11327
hlfa	M08786_2.00	chr13:16279629-16280129	anxa11a	0.241082	Body	0.161364	hlfa->chr13:16279629-16280129->anxa11a	Act	0.589804	0.376195	2.11327
sox8a	M00213_2.00	chr13:16103162-16103662	anxa11a	0.362965	Inter	0.211522	sox8a->chr13:16103162-16103662->anxa11a	Act	1.14831	0.376195	3.15969
sox13	M00213_2.00	chr13:16103162-16103662	anxa11a	0.486407	Inter	0.258057	sox13->chr13:16103162-16103662->anxa11a	Act	1.40426	0.376195	3.15969
sox8a	M00213_2.00	chr13:16103700-16104200	anxa11a	0.362965	Inter	0.211522	sox8a->chr13:16103700-16104200->anxa11a	Act	1.14831	0.376195	3.69973
sox13	M00213_2.00	chr13:16103700-16104200	anxa11a	0.486407	Inter	0.258057	sox13->chr13:16103700-16104200->anxa11a	Act	1.40426	0.376195	3.69973
runx1	M00271	chr13:16263577-16264077	anxa11a	0.148862	Inter	0.105752	runx1->chr13:16263577-16264077->anxa11a	Act	1.51009	0.376195	3.56942
stat3	M09664	chr13:16268468-16268968	anxa11a	0.37314	Inter	0.212212	stat3->chr13:16268468-16268968->anxa11a	Act	1.70202	0.376195	0
rarga	M03562	chr13:16528845-16529345	anxa11a	0.0655841	Inter	0.19001	rarga->chr13:16528845-16529345->anxa11a	Act	0.588239	0.376195	4.58391
sox8a	M00197_2.00	chr13:16528845-16529345	anxa11a	0.294131	Inter	0.211522	sox8a->chr13:16528845-16529345->anxa11a	Act	1.14831	0.376195	4.58391
sox13	M00197_2.00	chr13:16528845-16529345	anxa11a	0.391172	Inter	0.258057	sox13->chr13:16528845-16529345->anxa11a	Act	1.40426	0.376195	4.58391
rarga	M05680_2.00	chr13:16279026-16279526	anxa11a	0.116622	TSS	0.19001	rarga->chr13:16279026-16279526->anxa11a	Act	0.588239	0.376195	0
sox8a	M11331_2.00	chr13:16279026-16279526	anxa11a	0.448372	TSS	0.211522	sox8a->chr13:16279026-16279526->anxa11a	Act	1.14831	0.376195	0
sox13	M11331_2.00	chr13:16279026-16279526	anxa11a	0.562935	TSS	0.258057	sox13->chr13:16279026-16279526->anxa11a	Act	1.40426	0.376195	0
zic2b	M02940	chr8:30177749-30178249	aopep	0.166024	Body	0.106901	zic2b->chr8:30177749-30178249->aopep	Act	1.25359	0.519839	1.96132
runx1	M00271	chr8:30041913-30042413	aopep	0.148862	Inter	0.0948935	runx1->chr8:30041913-30042413->aopep	Act	1.51009	0.519839	4.05604
tcf7l1a	M00805	chr8:30041913-30042413	aopep	0.191918	Inter	0.111762	tcf7l1a->chr8:30041913-30042413->aopep	Act	0.749125	0.519839	4.05604
myb	M09990	chr8:30041913-30042413	aopep	0.18945	Inter	0.0889806	myb->chr8:30041913-30042413->aopep	Act	1.14685	0.519839	4.05604
myb	M00773	chr21:7091793-7092293	ap3b1a	0.193333	Inter	0.0740547	myb->chr21:7091793-7092293->ap3b1a	Act	1.14685	0.346351	4.22608
sox13	M03516_2.00	chr21:7091793-7092293	ap3b1a	0.202859	Inter	0.085576	sox13->chr21:7091793-7092293->ap3b1a	Act	1.40426	0.346351	4.22608
runx2a	M09630_2.00	chr21:7537134-7537634	ap3b1a	0.0615891	Inter	0.0609097	runx2a->chr21:7537134-7537634->ap3b1a	Act	0.656023	0.346351	0
rarga	M09282_2.00	chr6:49427950-49428450	apcdd1l	0.338476	Inter	0.242633	rarga->chr6:49427950-49428450->apcdd1l	Act	0.588239	0.334567	2.41833
rarga	M02705_2.00	chr6:49805076-49805576	apcdd1l	0.12428	Inter	0.242633	rarga->chr6:49805076-49805576->apcdd1l	Act	0.588239	0.334567	0
sox8a	M08041_2.00	chr6:49805076-49805576	apcdd1l	0.280954	Inter	0.269906	sox8a->chr6:49805076-49805576->apcdd1l	Act	1.14831	0.334567	0
sox13	M08041_2.00	chr6:49805076-49805576	apcdd1l	0.372203	Inter	0.339013	sox13->chr6:49805076-49805576->apcdd1l	Act	1.40426	0.334567	0
sox8a	M03522_2.00	chr6:49829243-49829743	apcdd1l	0.228176	Inter	0.269906	sox8a->chr6:49829243-49829743->apcdd1l	Act	1.14831	0.334567	2.5727
sox13	M03522_2.00	chr6:49829243-49829743	apcdd1l	0.271872	Inter	0.339013	sox13->chr6:49829243-49829743->apcdd1l	Act	1.40426	0.334567	2.5727
sox13	M03486_2.00	chr16:23960601-23961101	apoeb	0.0628481	Body	0.466172	sox13->chr16:23960601-23961101->apoeb	Act	1.40426	2.98452	1.49065
sox2	M03486_2.00	chr16:23960601-23961101	apoeb	0.0669492	Body	0.323045	sox2->chr16:23960601-23961101->apoeb	Act	0.777717	2.98452	1.49065
sox8a	M03507_2.00	chr16:23960601-23961101	apoeb	0.0937894	Body	0.425149	sox8a->chr16:23960601-23961101->apoeb	Act	1.14831	2.98452	1.49065
sox2	M10067	chr16:23746265-23746765	apoeb	0.445195	Inter	0.323045	sox2->chr16:23746265-23746765->apoeb	Act	0.777717	2.98452	2.82194
sox8a	M03502_2.00	chr16:23746265-23746765	apoeb	0.140255	Inter	0.425149	sox8a->chr16:23746265-23746765->apoeb	Act	1.14831	2.98452	2.82194
sox13	M03502_2.00	chr16:23746265-23746765	apoeb	0.172347	Inter	0.466172	sox13->chr16:23746265-23746765->apoeb	Act	1.40426	2.98452	2.82194
sox2	M03978_2.00	chr16:23987173-23987673	apoeb	0.184419	Inter	0.323045	sox2->chr16:23987173-23987673->apoeb	Act	0.777717	2.98452	0
sox8a	M03978_2.00	chr16:23987173-23987673	apoeb	0.190466	Inter	0.425149	sox8a->chr16:23987173-23987673->apoeb	Act	1.14831	2.98452	0
sox13	M03978_2.00	chr16:23987173-23987673	apoeb	0.244968	Inter	0.466172	sox13->chr16:23987173-23987673->apoeb	Act	1.40426	2.98452	0
stat3	M07065	chr16:24157248-24157748	apoeb	0.335993	Inter	0.40458	stat3->chr16:24157248-24157748->apoeb	Act	1.70202	2.98452	4.13469
sox2	M10067	chr16:24157248-24157748	apoeb	0.445195	Inter	0.323045	sox2->chr16:24157248-24157748->apoeb	Act	0.777717	2.98452	4.13469
sox8a	M02488_2.00	chr16:24157248-24157748	apoeb	0.236941	Inter	0.425149	sox8a->chr16:24157248-24157748->apoeb	Act	1.14831	2.98452	4.13469
sox13	M02488_2.00	chr16:24157248-24157748	apoeb	0.329447	Inter	0.466172	sox13->chr16:24157248-24157748->apoeb	Act	1.40426	2.98452	4.13469
nfixa	M09385_2.00	chr16:23961327-23961827	apoeb	0.271942	TSS	0.285622	nfixa->chr16:23961327-23961827->apoeb	Act	2.03913	2.98452	0
nfic	M09385_2.00	chr16:23961327-23961827	apoeb	0.403628	TSS	0.328604	nfic->chr16:23961327-23961827->apoeb	Act	2.75632	2.98452	0
gli2a	M05331	chr2:2737276-2737776	aqp1a.1	0.0593127	Body	0.503678	gli2a->chr2:2737276-2737776->aqp1a.1	Act	2.41799	2.7489	3.04653
sox8a	M05751_2.00	chr2:2737276-2737776	aqp1a.1	0.499782	Body	0.502145	sox8a->chr2:2737276-2737776->aqp1a.1	Act	1.14831	2.7489	3.04653
sox13	M05751_2.00	chr2:2737276-2737776	aqp1a.1	0.592029	Body	0.399075	sox13->chr2:2737276-2737776->aqp1a.1	Act	1.40426	2.7489	3.04653
sox8a	M08168_2.00	chr20:18163984-18164484	aqp4	0.422586	Body	0.52792	sox8a->chr20:18163984-18164484->aqp4	Act	1.14831	0.885875	0
sox13	M08168_2.00	chr20:18163984-18164484	aqp4	0.574225	Body	0.399696	sox13->chr20:18163984-18164484->aqp4	Act	1.40426	0.885875	0
nfic	M03475_2.00	chr20:18164974-18165474	aqp4	0.409764	Body	0.311288	nfic->chr20:18164974-18165474->aqp4	Act	2.75632	0.885875	0
sox8a	M02912	chr20:18136272-18136772	aqp4	0.0695312	Inter	0.52792	sox8a->chr20:18136272-18136772->aqp4	Act	1.14831	0.885875	2.20233
gli2a	M02641_2.00	chr20:18144707-18145207	aqp4	0.0629451	Inter	0.518247	gli2a->chr20:18144707-18145207->aqp4	Act	2.41799	0.885875	1.14106
tead1a	M03576_2.00	chr20:18144707-18145207	aqp4	0.401935	Inter	0.149741	tead1a->chr20:18144707-18145207->aqp4	Act	1.61908	0.885875	1.14106
sox8a	M11331_2.00	chr20:18144707-18145207	aqp4	0.448372	Inter	0.52792	sox8a->chr20:18144707-18145207->aqp4	Act	1.14831	0.885875	1.14106
sox13	M11331_2.00	chr20:18144707-18145207	aqp4	0.562935	Inter	0.399696	sox13->chr20:18144707-18145207->aqp4	Act	1.40426	0.885875	1.14106
sox8a	M11331_2.00	chr20:18145233-18145733	aqp4	0.448372	Inter	0.52792	sox8a->chr20:18145233-18145733->aqp4	Act	1.14831	0.885875	0
sox13	M11331_2.00	chr20:18145233-18145733	aqp4	0.562935	Inter	0.399696	sox13->chr20:18145233-18145733->aqp4	Act	1.40426	0.885875	0
gli2a	M05331	chr20:18192167-18192667	aqp4	0.0593127	Inter	0.518247	gli2a->chr20:18192167-18192667->aqp4	Act	2.41799	0.885875	0
sox8a	M02488_2.00	chr20:18192167-18192667	aqp4	0.236941	Inter	0.52792	sox8a->chr20:18192167-18192667->aqp4	Act	1.14831	0.885875	0
sox13	M02488_2.00	chr20:18192167-18192667	aqp4	0.329447	Inter	0.399696	sox13->chr20:18192167-18192667->aqp4	Act	1.40426	0.885875	0
sox8a	M11331_2.00	chr20:18392884-18393384	aqp4	0.448372	Inter	0.52792	sox8a->chr20:18392884-18393384->aqp4	Act	1.14831	0.885875	0
sox13	M11331_2.00	chr20:18392884-18393384	aqp4	0.562935	Inter	0.399696	sox13->chr20:18392884-18393384->aqp4	Act	1.40426	0.885875	0
mybl1	M04043	chr14:26566701-26567201	arap3	0.129811	Body	0.111818	mybl1->chr14:26566701-26567201->arap3	Act	1.69618	0.868649	0
stat3	M00223	chr14:26615572-26616072	arap3	0.269873	Body	0.276743	stat3->chr14:26615572-26616072->arap3	Act	1.70202	0.868649	1.29532
nfixa	M02050	chr14:26615572-26616072	arap3	0.288932	Body	0.240616	nfixa->chr14:26615572-26616072->arap3	Act	2.03913	0.868649	1.29532
sox8a	M00070_2.00	chr14:26615572-26616072	arap3	0.197053	Body	0.296256	sox8a->chr14:26615572-26616072->arap3	Act	1.14831	0.868649	1.29532
sox2	M00070_2.00	chr14:26615572-26616072	arap3	0.209096	Body	0.282749	sox2->chr14:26615572-26616072->arap3	Act	0.777717	0.868649	1.29532
sox13	M00070_2.00	chr14:26615572-26616072	arap3	0.268754	Body	0.359511	sox13->chr14:26615572-26616072->arap3	Act	1.40426	0.868649	1.29532
nfic	M03478_2.00	chr14:26615572-26616072	arap3	0.410432	Body	0.292007	nfic->chr14:26615572-26616072->arap3	Act	2.75632	0.868649	1.29532
erfl3	M04721_2.00	chr14:26615572-26616072	arap3	0.17409	Body	0.227608	erfl3->chr14:26615572-26616072->arap3	Act	1.01761	0.868649	1.29532
rarga	M08152_2.00	chr14:26418101-26418601	arap3	0.20127	Inter	0.246839	rarga->chr14:26418101-26418601->arap3	Act	0.588239	0.868649	5.45192
nfixa	M02050	chr14:26552863-26553363	arap3	0.288932	Inter	0.240616	nfixa->chr14:26552863-26553363->arap3	Act	2.03913	0.868649	4.02041
erfl3	M09057_2.00	chr14:26552863-26553363	arap3	0.317973	Inter	0.227608	erfl3->chr14:26552863-26553363->arap3	Act	1.01761	0.868649	4.02041
nfic	M09381_2.00	chr14:26552863-26553363	arap3	0.380148	Inter	0.292007	nfic->chr14:26552863-26553363->arap3	Act	2.75632	0.868649	4.02041
sox8a	M04546	chr14:26733816-26734316	arap3	0.229255	Inter	0.296256	sox8a->chr14:26733816-26734316->arap3	Act	1.14831	0.868649	0
sox2	M03488_2.00	chr14:26733816-26734316	arap3	0.171217	Inter	0.282749	sox2->chr14:26733816-26734316->arap3	Act	0.777717	0.868649	0
sox13	M03488_2.00	chr14:26733816-26734316	arap3	0.240095	Inter	0.359511	sox13->chr14:26733816-26734316->arap3	Act	1.40426	0.868649	0
rarga	M02705_2.00	chr14:26740929-26741429	arap3	0.12428	Inter	0.246839	rarga->chr14:26740929-26741429->arap3	Act	0.588239	0.868649	2.7421
sox8a	M00197_2.00	chr14:26746915-26747415	arap3	0.294131	Inter	0.296256	sox8a->chr14:26746915-26747415->arap3	Act	1.14831	0.868649	3.899
sox2	M00197_2.00	chr14:26746915-26747415	arap3	0.312264	Inter	0.282749	sox2->chr14:26746915-26747415->arap3	Act	0.777717	0.868649	3.899
sox13	M00197_2.00	chr14:26746915-26747415	arap3	0.391172	Inter	0.359511	sox13->chr14:26746915-26747415->arap3	Act	1.40426	0.868649	3.899
sox2	M07432	chr14:26752747-26753247	arap3	0.3261	Inter	0.282749	sox2->chr14:26752747-26753247->arap3	Act	0.777717	0.868649	3.53659
erfl3	M08111_2.00	chr14:26752747-26753247	arap3	0.320573	Inter	0.227608	erfl3->chr14:26752747-26753247->arap3	Act	1.01761	0.868649	3.53659
sox8a	M08039	chr1:25486073-25486573	arfip1	0.108699	Body	0.110361	sox8a->chr1:25486073-25486573->arfip1	Act	1.14831	0.620028	0
sox13	M03483_2.00	chr1:25486073-25486573	arfip1	0.121407	Body	0.137672	sox13->chr1:25486073-25486573->arfip1	Act	1.40426	0.620028	0
fosl2	M04335_2.00	chr1:25486073-25486573	arfip1	0.179559	Body	0.122001	fosl2->chr1:25486073-25486573->arfip1	Act	2.31203	0.620028	0
mybl1	M08150_2.00	chr1:25486073-25486573	arfip1	0.130889	Body	0.108739	mybl1->chr1:25486073-25486573->arfip1	Act	1.69618	0.620028	0
sox8a	M09388_2.00	chr1:25485454-25485954	arfip1	0.417816	TSS	0.110361	sox8a->chr1:25485454-25485954->arfip1	Act	1.14831	0.620028	0
sox13	M09388_2.00	chr1:25485454-25485954	arfip1	0.566188	TSS	0.137672	sox13->chr1:25485454-25485954->arfip1	Act	1.40426	0.620028	0
olig2	M09703	chr13:33024255-33024755	arg2	0.0616604	Body	0.130161	olig2->chr13:33024255-33024755->arg2	Act	1.16665	0.570978	2.78197
erfl3	M04709_2.00	chr13:33024255-33024755	arg2	0.198175	Body	0.0846216	erfl3->chr13:33024255-33024755->arg2	Act	1.01761	0.570978	2.78197
olig2	M09703	chr13:33024821-33025321	arg2	0.0616604	Body	0.130161	olig2->chr13:33024821-33025321->arg2	Act	1.16665	0.570978	1.56267
erfl3	M04709_2.00	chr13:33024821-33025321	arg2	0.198175	Body	0.0846216	erfl3->chr13:33024821-33025321->arg2	Act	1.01761	0.570978	1.56267
tead1a	M05825_2.00	chr13:33024821-33025321	arg2	0.390565	Body	0.0859399	tead1a->chr13:33024821-33025321->arg2	Act	1.61908	0.570978	1.56267
stat3	M01595	chr13:33025604-33026104	arg2	0.36922	Body	0.0658427	stat3->chr13:33025604-33026104->arg2	Act	1.70202	0.570978	2.74702
myb	M02883	chr13:33025604-33026104	arg2	0.191164	Body	0.0809624	myb->chr13:33025604-33026104->arg2	Act	1.14685	0.570978	2.74702
esr2a	M05623_2.00	chr13:33025604-33026104	arg2	0.0656126	Body	0.0919629	esr2a->chr13:33025604-33026104->arg2	Act	1.11001	0.570978	2.74702
stat3	M01595	chr13:33026109-33026609	arg2	0.36922	Body	0.0658427	stat3->chr13:33026109-33026609->arg2	Act	1.70202	0.570978	3.04117
esr2a	M01297_2.00	chr13:33026109-33026609	arg2	0.100078	Body	0.0919629	esr2a->chr13:33026109-33026609->arg2	Act	1.11001	0.570978	3.04117
ascl1a	M02814_2.00	chr13:33026109-33026609	arg2	0.0744385	Body	0.107103	ascl1a->chr13:33026109-33026609->arg2	Act	0.683363	0.570978	3.04117
gli2a	M05331	chr13:33267358-33267858	arg2	0.0593127	Inter	0.0823032	gli2a->chr13:33267358-33267858->arg2	Act	2.41799	0.570978	0
stat3	M10383	chr13:33267358-33267858	arg2	0.307874	Inter	0.0658427	stat3->chr13:33267358-33267858->arg2	Act	1.70202	0.570978	0
tead1a	M03995_2.00	chr13:33267358-33267858	arg2	0.397303	Inter	0.0859399	tead1a->chr13:33267358-33267858->arg2	Act	1.61908	0.570978	0
olig2	M10019	chr17:113334-113834	arhgap11a	0.108869	Body	0.260401	olig2->chr17:113334-113834->arhgap11a	Act	1.16665	0.37519	0
fosl2	M00925	chr12:20438994-20439494	arhgap17a	0.522926	Body	0.0709541	fosl2->chr12:20438994-20439494->arhgap17a	Act	2.31203	0.444656	0
tcf7l1a	M01594	chr2:12302385-12302885	arhgap21b	0.328895	Body	0.227737	tcf7l1a->chr2:12302385-12302885->arhgap21b	Act	0.749125	0.609513	0
sox8a	M00213_2.00	chr2:12302385-12302885	arhgap21b	0.362965	Body	0.230768	sox8a->chr2:12302385-12302885->arhgap21b	Act	1.14831	0.609513	0
sox13	M00213_2.00	chr2:12302385-12302885	arhgap21b	0.486407	Body	0.24751	sox13->chr2:12302385-12302885->arhgap21b	Act	1.40426	0.609513	0
tcf7l1b	M09400_2.00	chr2:12302385-12302885	arhgap21b	0.417512	Body	0.244019	tcf7l1b->chr2:12302385-12302885->arhgap21b	Act	0.336061	0.609513	0
sox8a	M03487_2.00	chr2:12376476-12376976	arhgap21b	0.0815095	TSS	0.230768	sox8a->chr2:12376476-12376976->arhgap21b	Act	1.14831	0.609513	1.95105
sox13	M03487_2.00	chr2:12376476-12376976	arhgap21b	0.137222	TSS	0.24751	sox13->chr2:12376476-12376976->arhgap21b	Act	1.40426	0.609513	1.95105
sox8a	M03510_2.00	chr12:4992286-4992786	arhgap27	0.0607645	Body	0.396435	sox8a->chr12:4992286-4992786->arhgap27	Act	1.14831	0.617592	0
sox8a	M01014	chr12:4997518-4998018	arhgap27	0.328759	Body	0.396435	sox8a->chr12:4997518-4998018->arhgap27	Act	1.14831	0.617592	4.57271
hlfa	M08786_2.00	chr12:4997518-4998018	arhgap27	0.241082	Body	0.295118	hlfa->chr12:4997518-4998018->arhgap27	Act	0.589804	0.617592	4.57271
sox8a	M11331_2.00	chr12:4998032-4998532	arhgap27	0.448372	Body	0.396435	sox8a->chr12:4998032-4998532->arhgap27	Act	1.14831	0.617592	0
sox8a	M03971_2.00	chr12:4971323-4971823	arhgap27	0.144076	TSS	0.396435	sox8a->chr12:4971323-4971823->arhgap27	Act	1.14831	0.617592	3.00757
sox8a	M03487_2.00	chr2:15128019-15128519	arhgap29b	0.0815095	Body	0.160079	sox8a->chr2:15128019-15128519->arhgap29b	Act	1.14831	0.553275	0
sox13	M03487_2.00	chr2:15128019-15128519	arhgap29b	0.137222	Body	0.192748	sox13->chr2:15128019-15128519->arhgap29b	Act	1.40426	0.553275	0
rx1	M05224_2.00	chr2:15128019-15128519	arhgap29b	0.13781	Body	0.128298	rx1->chr2:15128019-15128519->arhgap29b	Act	0.850525	0.553275	0
rx1	M05224_2.00	chr2:15128637-15129137	arhgap29b	0.13781	Body	0.128298	rx1->chr2:15128637-15129137->arhgap29b	Act	0.850525	0.553275	0
sox8a	M05751_2.00	chr2:15128637-15129137	arhgap29b	0.499782	Body	0.160079	sox8a->chr2:15128637-15129137->arhgap29b	Act	1.14831	0.553275	0
sox13	M05751_2.00	chr2:15128637-15129137	arhgap29b	0.592029	Body	0.192748	sox13->chr2:15128637-15129137->arhgap29b	Act	1.40426	0.553275	0
sox8a	M04546	chr2:15139554-15140054	arhgap29b	0.229255	Body	0.160079	sox8a->chr2:15139554-15140054->arhgap29b	Act	1.14831	0.553275	0
sox13	M00213_2.00	chr2:15139554-15140054	arhgap29b	0.486407	Body	0.192748	sox13->chr2:15139554-15140054->arhgap29b	Act	1.40426	0.553275	0
tead1a	M05825_2.00	chr2:15139554-15140054	arhgap29b	0.390565	Body	0.172649	tead1a->chr2:15139554-15140054->arhgap29b	Act	1.61908	0.553275	0
stat3	M00223	chr2:15144063-15144563	arhgap29b	0.269873	Body	0.158462	stat3->chr2:15144063-15144563->arhgap29b	Act	1.70202	0.553275	0
sox8a	M02912	chr2:15144063-15144563	arhgap29b	0.0695312	Body	0.160079	sox8a->chr2:15144063-15144563->arhgap29b	Act	1.14831	0.553275	0
gli2a	M03902	chr2:15144063-15144563	arhgap29b	0.260418	Body	0.278572	gli2a->chr2:15144063-15144563->arhgap29b	Act	2.41799	0.553275	0
sox13	M00197_2.00	chr2:15144063-15144563	arhgap29b	0.391172	Body	0.192748	sox13->chr2:15144063-15144563->arhgap29b	Act	1.40426	0.553275	0
gli3	M02641_2.00	chr2:15144063-15144563	arhgap29b	0.0729654	Body	0.190674	gli3->chr2:15144063-15144563->arhgap29b	Act	0.96568	0.553275	0
rx1	M05219_2.00	chr2:15144063-15144563	arhgap29b	0.0781175	Body	0.128298	rx1->chr2:15144063-15144563->arhgap29b	Act	0.850525	0.553275	0
nfixa	M05747_2.00	chr2:15144063-15144563	arhgap29b	0.285039	Body	0.116173	nfixa->chr2:15144063-15144563->arhgap29b	Act	2.03913	0.553275	0
nfic	M05747_2.00	chr2:15144063-15144563	arhgap29b	0.434369	Body	0.169979	nfic->chr2:15144063-15144563->arhgap29b	Act	2.75632	0.553275	0
rx1	M06325_2.00	chr2:15157722-15158222	arhgap29b	0.0579416	Body	0.128298	rx1->chr2:15157722-15158222->arhgap29b	Act	0.850525	0.553275	0
rx1	M03145_2.00	chr2:15107375-15107875	arhgap29b	0.111956	Inter	0.128298	rx1->chr2:15107375-15107875->arhgap29b	Act	0.850525	0.553275	0
sox8a	M03519_2.00	chr15:8641623-8642123	arhgap35a	0.18514	Body	0.267319	sox8a->chr15:8641623-8642123->arhgap35a	Act	1.14831	1.12499	0
sox13	M03519_2.00	chr15:8641623-8642123	arhgap35a	0.245099	Body	0.314863	sox13->chr15:8641623-8642123->arhgap35a	Act	1.40426	1.12499	0
sox8a	M03487_2.00	chr15:8683664-8684164	arhgap35a	0.0815095	Body	0.267319	sox8a->chr15:8683664-8684164->arhgap35a	Act	1.14831	1.12499	3.4401
sox13	M03487_2.00	chr15:8683664-8684164	arhgap35a	0.137222	Body	0.314863	sox13->chr15:8683664-8684164->arhgap35a	Act	1.40426	1.12499	3.4401
nfixa	M02050	chr15:8686522-8687022	arhgap35a	0.288932	Body	0.27713	nfixa->chr15:8686522-8687022->arhgap35a	Act	2.03913	1.12499	0
nfic	M09381_2.00	chr15:8686522-8687022	arhgap35a	0.380148	Body	0.317029	nfic->chr15:8686522-8687022->arhgap35a	Act	2.75632	1.12499	0
nfixa	M05741_2.00	chr15:8733760-8734260	arhgap35a	0.282626	Body	0.27713	nfixa->chr15:8733760-8734260->arhgap35a	Act	2.03913	1.12499	3.51266
nfic	M05741_2.00	chr15:8733760-8734260	arhgap35a	0.42857	Body	0.317029	nfic->chr15:8733760-8734260->arhgap35a	Act	2.75632	1.12499	3.51266
tead1a	M03996_2.00	chr15:8738084-8738584	arhgap35a	0.38626	Body	0.275111	tead1a->chr15:8738084-8738584->arhgap35a	Act	1.61908	1.12499	2.35694
sox8a	M11331_2.00	chr15:8738084-8738584	arhgap35a	0.448372	Body	0.267319	sox8a->chr15:8738084-8738584->arhgap35a	Act	1.14831	1.12499	2.35694
sox13	M11331_2.00	chr15:8738084-8738584	arhgap35a	0.562935	Body	0.314863	sox13->chr15:8738084-8738584->arhgap35a	Act	1.40426	1.12499	2.35694
gli2a	M05331	chr15:8749655-8750155	arhgap35a	0.0593127	Body	0.394624	gli2a->chr15:8749655-8750155->arhgap35a	Act	2.41799	1.12499	0
sox8a	M05751_2.00	chr15:8749655-8750155	arhgap35a	0.499782	Body	0.267319	sox8a->chr15:8749655-8750155->arhgap35a	Act	1.14831	1.12499	0
sox13	M05751_2.00	chr15:8749655-8750155	arhgap35a	0.592029	Body	0.314863	sox13->chr15:8749655-8750155->arhgap35a	Act	1.40426	1.12499	0
sox8a	M08899	chr15:8762835-8763335	arhgap35a	0.313319	Body	0.267319	sox8a->chr15:8762835-8763335->arhgap35a	Act	1.14831	1.12499	0
sox13	M08899	chr15:8762835-8763335	arhgap35a	0.46894	Body	0.314863	sox13->chr15:8762835-8763335->arhgap35a	Act	1.40426	1.12499	0
sox8a	M04546	chr15:8762266-8762766	arhgap35a	0.229255	TSS	0.267319	sox8a->chr15:8762266-8762766->arhgap35a	Act	1.14831	1.12499	0
sox13	M08899	chr15:8762266-8762766	arhgap35a	0.46894	TSS	0.314863	sox13->chr15:8762266-8762766->arhgap35a	Act	1.40426	1.12499	0
tead1a	M05825_2.00	chr15:8762266-8762766	arhgap35a	0.390565	TSS	0.275111	tead1a->chr15:8762266-8762766->arhgap35a	Act	1.61908	1.12499	0
tcf7l1a	M00805	chr21:22738704-22739204	arhgap42a	0.191918	Body	0.311045	tcf7l1a->chr21:22738704-22739204->arhgap42a	Act	0.749125	1.27732	1.44816
mybl1	M00180_2.00	chr21:22738704-22739204	arhgap42a	0.251215	Body	0.314155	mybl1->chr21:22738704-22739204->arhgap42a	Act	1.69618	1.27732	1.44816
erf	M07950_2.00	chr21:22738704-22739204	arhgap42a	0.0503399	Body	0.26695	erf->chr21:22738704-22739204->arhgap42a	Act	0.721766	1.27732	1.44816
erfl3	M07950_2.00	chr21:22738704-22739204	arhgap42a	0.055452	Body	0.309644	erfl3->chr21:22738704-22739204->arhgap42a	Act	1.01761	1.27732	1.44816
rfx2	M09365_2.00	chr21:22738704-22739204	arhgap42a	0.293158	Body	0.326572	rfx2->chr21:22738704-22739204->arhgap42a	Act	1.13253	1.27732	1.44816
tead1a	M09437_2.00	chr21:22738704-22739204	arhgap42a	0.391962	Body	0.390982	tead1a->chr21:22738704-22739204->arhgap42a	Act	1.61908	1.27732	1.44816
junbb	M00517	chr21:22749437-22749937	arhgap42a	0.339284	Body	0.260735	junbb->chr21:22749437-22749937->arhgap42a	Act	0.837658	1.27732	5.02738
rfx2	M00975	chr21:22749437-22749937	arhgap42a	0.200446	Body	0.326572	rfx2->chr21:22749437-22749937->arhgap42a	Act	1.13253	1.27732	5.02738
fosl2	M08923	chr21:22749437-22749937	arhgap42a	0.539618	Body	0.403951	fosl2->chr21:22749437-22749937->arhgap42a	Act	2.31203	1.27732	5.02738
sox2	M03492_2.00	chr21:22749437-22749937	arhgap42a	0.161162	Body	0.320147	sox2->chr21:22749437-22749937->arhgap42a	Act	0.777717	1.27732	5.02738
sox13	M03492_2.00	chr21:22749437-22749937	arhgap42a	0.210753	Body	0.301097	sox13->chr21:22749437-22749937->arhgap42a	Act	1.40426	1.27732	5.02738
stat3	M08043_2.00	chr21:22749437-22749937	arhgap42a	0.384427	Body	0.242375	stat3->chr21:22749437-22749937->arhgap42a	Act	1.70202	1.27732	5.02738
mybl1	M08150_2.00	chr21:22749437-22749937	arhgap42a	0.130889	Body	0.314155	mybl1->chr21:22749437-22749937->arhgap42a	Act	1.69618	1.27732	5.02738
ascl1a	M08730_2.00	chr21:22749437-22749937	arhgap42a	0.0853244	Body	0.301564	ascl1a->chr21:22749437-22749937->arhgap42a	Act	0.683363	1.27732	5.02738
junbb	M00924	chr21:22752151-22752651	arhgap42a	0.332304	Body	0.260735	junbb->chr21:22752151-22752651->arhgap42a	Act	0.837658	1.27732	4.15668
fosl2	M00924	chr21:22752151-22752651	arhgap42a	0.534263	Body	0.403951	fosl2->chr21:22752151-22752651->arhgap42a	Act	2.31203	1.27732	4.15668
sox2	M02719_2.00	chr21:22752151-22752651	arhgap42a	0.410213	Body	0.320147	sox2->chr21:22752151-22752651->arhgap42a	Act	0.777717	1.27732	4.15668
sox13	M02719_2.00	chr21:22752151-22752651	arhgap42a	0.532837	Body	0.301097	sox13->chr21:22752151-22752651->arhgap42a	Act	1.40426	1.27732	4.15668
erf	M09055_2.00	chr21:22752151-22752651	arhgap42a	0.288082	Body	0.26695	erf->chr21:22752151-22752651->arhgap42a	Act	0.721766	1.27732	4.15668
erfl3	M09055_2.00	chr21:22752151-22752651	arhgap42a	0.35224	Body	0.309644	erfl3->chr21:22752151-22752651->arhgap42a	Act	1.01761	1.27732	4.15668
erf	M00771	chr21:22757022-22757522	arhgap42a	0.179361	Body	0.26695	erf->chr21:22757022-22757522->arhgap42a	Act	0.721766	1.27732	4.48252
foxn4	M04645	chr21:22757022-22757522	arhgap42a	0.110591	Body	0.248827	foxn4->chr21:22757022-22757522->arhgap42a	Act	1.98217	1.27732	4.48252
sox2	M08973	chr21:22757022-22757522	arhgap42a	0.354951	Body	0.320147	sox2->chr21:22757022-22757522->arhgap42a	Act	0.777717	1.27732	4.48252
erfl3	M04709_2.00	chr21:22757022-22757522	arhgap42a	0.198175	Body	0.309644	erfl3->chr21:22757022-22757522->arhgap42a	Act	1.01761	1.27732	4.48252
sox13	M05897_2.00	chr21:22757022-22757522	arhgap42a	0.43957	Body	0.301097	sox13->chr21:22757022-22757522->arhgap42a	Act	1.40426	1.27732	4.48252
zic2b	M09011_2.00	chr21:22757022-22757522	arhgap42a	0.106881	Body	0.31186	zic2b->chr21:22757022-22757522->arhgap42a	Act	1.25359	1.27732	4.48252
fosl2	M08932	chr21:22507154-22507654	arhgap42a	0.251979	Inter	0.403951	fosl2->chr21:22507154-22507654->arhgap42a	Act	2.31203	1.27732	0
junbb	M07819_2.00	chr21:22507154-22507654	arhgap42a	0.177893	Inter	0.260735	junbb->chr21:22507154-22507654->arhgap42a	Act	0.837658	1.27732	0
sox8a	M01026_2.00	chr18:41908962-41909462	arhgap42b	0.365741	Body	0.513178	sox8a->chr18:41908962-41909462->arhgap42b	Act	1.14831	2.24575	5.10661
sox2	M01026_2.00	chr18:41908962-41909462	arhgap42b	0.392324	Body	0.358266	sox2->chr18:41908962-41909462->arhgap42b	Act	0.777717	2.24575	5.10661
sox13	M01026_2.00	chr18:41908962-41909462	arhgap42b	0.499614	Body	0.553387	sox13->chr18:41908962-41909462->arhgap42b	Act	1.40426	2.24575	5.10661
sox2	M04541	chr18:42071480-42071980	arhgap42b	0.0853381	Body	0.358266	sox2->chr18:42071480-42071980->arhgap42b	Act	0.777717	2.24575	2.88565
tcf7l1b	M00200_2.00	chr18:42071480-42071980	arhgap42b	0.0530075	Body	0.31079	tcf7l1b->chr18:42071480-42071980->arhgap42b	Act	0.336061	2.24575	2.88565
sox8a	M03518_2.00	chr18:42071480-42071980	arhgap42b	0.116378	Body	0.513178	sox8a->chr18:42071480-42071980->arhgap42b	Act	1.14831	2.24575	2.88565
sox13	M03518_2.00	chr18:42071480-42071980	arhgap42b	0.165621	Body	0.553387	sox13->chr18:42071480-42071980->arhgap42b	Act	1.40426	2.24575	2.88565
nfixa	M08164_2.00	chr18:42189339-42189839	arhgap42b	0.266833	Inter	0.339354	nfixa->chr18:42189339-42189839->arhgap42b	Act	2.03913	2.24575	0
stat3	M01220	chr18:42282550-42283050	arhgap42b	0.281591	Inter	0.411043	stat3->chr18:42282550-42283050->arhgap42b	Act	1.70202	2.24575	2.72699
nfixa	M02050	chr18:42282550-42283050	arhgap42b	0.288932	Inter	0.339354	nfixa->chr18:42282550-42283050->arhgap42b	Act	2.03913	2.24575	2.72699
sox2	M02246	chr18:42282550-42283050	arhgap42b	0.217687	Inter	0.358266	sox2->chr18:42282550-42283050->arhgap42b	Act	0.777717	2.24575	2.72699
sox8a	M03971_2.00	chr18:42282550-42283050	arhgap42b	0.144076	Inter	0.513178	sox8a->chr18:42282550-42283050->arhgap42b	Act	1.14831	2.24575	2.72699
sox13	M03971_2.00	chr18:42282550-42283050	arhgap42b	0.210909	Inter	0.553387	sox13->chr18:42282550-42283050->arhgap42b	Act	1.40426	2.24575	2.72699
sox8a	M02718_2.00	chr3:48499349-48499849	ARHGAP44	0.266489	Inter	0.304708	sox8a->chr3:48499349-48499849->ARHGAP44	Act	1.14831	0.899549	4.61765
sox13	M02718_2.00	chr3:48499349-48499849	ARHGAP44	0.382777	Inter	0.304558	sox13->chr3:48499349-48499849->ARHGAP44	Act	1.40426	0.899549	4.61765
sox8a	M03522_2.00	chr3:48507260-48507760	ARHGAP44	0.228176	Inter	0.304708	sox8a->chr3:48507260-48507760->ARHGAP44	Act	1.14831	0.899549	3.26616
sox13	M03522_2.00	chr3:48507260-48507760	ARHGAP44	0.271872	Inter	0.304558	sox13->chr3:48507260-48507760->ARHGAP44	Act	1.40426	0.899549	3.26616
sox8a	M02912	chr3:48547308-48547808	ARHGAP44	0.0695312	Inter	0.304708	sox8a->chr3:48547308-48547808->ARHGAP44	Act	1.14831	0.899549	2.06507
sox8a	M01014	chr3:48587030-48587530	ARHGAP44	0.328759	Inter	0.304708	sox8a->chr3:48587030-48587530->ARHGAP44	Act	1.14831	0.899549	0
sox13	M01014	chr3:48587030-48587530	ARHGAP44	0.447704	Inter	0.304558	sox13->chr3:48587030-48587530->ARHGAP44	Act	1.40426	0.899549	0
sox8a	M00197_2.00	chr3:48730301-48730801	ARHGAP44	0.294131	Inter	0.304708	sox8a->chr3:48730301-48730801->ARHGAP44	Act	1.14831	0.899549	4.48661
sox13	M00197_2.00	chr3:48730301-48730801	ARHGAP44	0.391172	Inter	0.304558	sox13->chr3:48730301-48730801->ARHGAP44	Act	1.40426	0.899549	4.48661
erf	M06188_2.00	chr2:56756118-56756618	arhgap45a	0.0709099	TSS	0.111067	erf->chr2:56756118-56756618->arhgap45a	Act	0.721766	0.359596	0
runx1	M00271	chr17:31739133-31739633	arhgap5	0.148862	Body	0.173024	runx1->chr17:31739133-31739633->arhgap5	Act	1.51009	0.53378	0
erf	M00771	chr17:31739133-31739633	arhgap5	0.179361	Body	0.120288	erf->chr17:31739133-31739633->arhgap5	Act	0.721766	0.53378	0
erfl3	M01477_2.00	chr17:31739133-31739633	arhgap5	0.101798	Body	0.152586	erfl3->chr17:31739133-31739633->arhgap5	Act	1.01761	0.53378	0
tead1a	M05824_2.00	chr17:31739133-31739633	arhgap5	0.401349	Body	0.158618	tead1a->chr17:31739133-31739633->arhgap5	Act	1.61908	0.53378	0
rx1	M06325_2.00	chr17:31739133-31739633	arhgap5	0.0579416	Body	0.102382	rx1->chr17:31739133-31739633->arhgap5	Act	0.850525	0.53378	0
stat3	M08017_2.00	chr17:31739133-31739633	arhgap5	0.306831	Body	0.161993	stat3->chr17:31739133-31739633->arhgap5	Act	1.70202	0.53378	0
sox2	M10067	chr17:31720812-31721312	arhgap5	0.445195	Inter	0.145316	sox2->chr17:31720812-31721312->arhgap5	Act	0.777717	0.53378	0
sox13	M05751_2.00	chr17:31720812-31721312	arhgap5	0.592029	Inter	0.15696	sox13->chr17:31720812-31721312->arhgap5	Act	1.40426	0.53378	0
runx1	M00984	chr17:31727290-31727790	arhgap5	0.181108	Inter	0.173024	runx1->chr17:31727290-31727790->arhgap5	Act	1.51009	0.53378	4.26254
sox2	M01014	chr17:31727290-31727790	arhgap5	0.352046	Inter	0.145316	sox2->chr17:31727290-31727790->arhgap5	Act	0.777717	0.53378	4.26254
sox13	M01014	chr17:31727290-31727790	arhgap5	0.447704	Inter	0.15696	sox13->chr17:31727290-31727790->arhgap5	Act	1.40426	0.53378	4.26254
fosl2	M03870	chr17:31727290-31727790	arhgap5	0.542626	Inter	0.163708	fosl2->chr17:31727290-31727790->arhgap5	Act	2.31203	0.53378	4.26254
foxj3	M01987_2.00	chr17:31727290-31727790	arhgap5	0.0790124	Inter	0.0961112	foxj3->chr17:31727290-31727790->arhgap5	Act	0.808686	0.53378	4.26254
erf	M07950_2.00	chr17:31727290-31727790	arhgap5	0.0503399	Inter	0.120288	erf->chr17:31727290-31727790->arhgap5	Act	0.721766	0.53378	4.26254
erfl3	M07950_2.00	chr17:31727290-31727790	arhgap5	0.055452	Inter	0.152586	erfl3->chr17:31727290-31727790->arhgap5	Act	1.01761	0.53378	4.26254
erf	M07950_2.00	chr17:31727871-31728371	arhgap5	0.0503399	Inter	0.120288	erf->chr17:31727871-31728371->arhgap5	Act	0.721766	0.53378	2.19476
erfl3	M07950_2.00	chr17:31727871-31728371	arhgap5	0.055452	Inter	0.152586	erfl3->chr17:31727871-31728371->arhgap5	Act	1.01761	0.53378	2.19476
rx1	M03823_2.00	chr17:31738541-31739041	arhgap5	0.185123	TSS	0.102382	rx1->chr17:31738541-31739041->arhgap5	Act	0.850525	0.53378	0
sox2	M00710_2.00	chr17:31739926-31740426	arhgap5	0.254246	TSS	0.145316	sox2->chr17:31739926-31740426->arhgap5	Act	0.777717	0.53378	0
sox13	M00710_2.00	chr17:31739926-31740426	arhgap5	0.304433	TSS	0.15696	sox13->chr17:31739926-31740426->arhgap5	Act	1.40426	0.53378	0
erf	M04798_2.00	chr17:31739926-31740426	arhgap5	0.0817369	TSS	0.120288	erf->chr17:31739926-31740426->arhgap5	Act	0.721766	0.53378	0
erfl3	M04798_2.00	chr17:31739926-31740426	arhgap5	0.0839726	TSS	0.152586	erfl3->chr17:31739926-31740426->arhgap5	Act	1.01761	0.53378	0
tead1a	M08175_2.00	chr17:31739926-31740426	arhgap5	0.417358	TSS	0.158618	tead1a->chr17:31739926-31740426->arhgap5	Act	1.61908	0.53378	0
sox8a	M01014	chr17:25196891-25197391	arhgef10	0.328759	Body	0.371996	sox8a->chr17:25196891-25197391->arhgef10	Act	1.14831	0.808318	0.994979
sox13	M01014	chr17:25196891-25197391	arhgef10	0.447704	Body	0.39191	sox13->chr17:25196891-25197391->arhgef10	Act	1.40426	0.808318	0.994979
sox8a	M01014	chr17:25197436-25197936	arhgef10	0.328759	Body	0.371996	sox8a->chr17:25197436-25197936->arhgef10	Act	1.14831	0.808318	0
sox13	M01014	chr17:25197436-25197936	arhgef10	0.447704	Body	0.39191	sox13->chr17:25197436-25197936->arhgef10	Act	1.40426	0.808318	0
gli3	M01704	chr17:25199928-25200428	arhgef10	0.068013	Body	0.318176	gli3->chr17:25199928-25200428->arhgef10	Act	0.96568	0.808318	0
sox8a	M03483_2.00	chr17:25199928-25200428	arhgef10	0.107507	Body	0.371996	sox8a->chr17:25199928-25200428->arhgef10	Act	1.14831	0.808318	0
sox13	M03483_2.00	chr17:25199928-25200428	arhgef10	0.121407	Body	0.39191	sox13->chr17:25199928-25200428->arhgef10	Act	1.40426	0.808318	0
sox8a	M05893_2.00	chr17:25226826-25227326	arhgef10	0.336224	Body	0.371996	sox8a->chr17:25226826-25227326->arhgef10	Act	1.14831	0.808318	3.46465
sox13	M05893_2.00	chr17:25226826-25227326	arhgef10	0.472172	Body	0.39191	sox13->chr17:25226826-25227326->arhgef10	Act	1.40426	0.808318	3.46465
rarga	M09313_2.00	chr17:25246377-25246877	arhgef10	0.344843	Body	0.308761	rarga->chr17:25246377-25246877->arhgef10	Act	0.588239	0.808318	5.78757
stat3	M00777	chr17:25248477-25248977	arhgef10	0.207571	Body	0.316003	stat3->chr17:25248477-25248977->arhgef10	Act	1.70202	0.808318	4.16072
sox8a	M03530_2.00	chr17:25248477-25248977	arhgef10	0.0554309	Body	0.371996	sox8a->chr17:25248477-25248977->arhgef10	Act	1.14831	0.808318	4.16072
sox13	M03530_2.00	chr17:25248477-25248977	arhgef10	0.077074	Body	0.39191	sox13->chr17:25248477-25248977->arhgef10	Act	1.40426	0.808318	4.16072
rarga	M09282_2.00	chr17:25248477-25248977	arhgef10	0.338476	Body	0.308761	rarga->chr17:25248477-25248977->arhgef10	Act	0.588239	0.808318	4.16072
sox13	M11342_2.00	chr17:25181736-25182236	arhgef10	0.357691	Inter	0.39191	sox13->chr17:25181736-25182236->arhgef10	Act	1.40426	0.808318	0
tcf7l1a	M01594	chr15:22458466-22458966	arhgef12a	0.328895	Body	0.159917	tcf7l1a->chr15:22458466-22458966->arhgef12a	Act	0.749125	0.623482	2.36486
e2f3	M02847	chr15:22458466-22458966	arhgef12a	0.0527864	Body	0.113739	e2f3->chr15:22458466-22458966->arhgef12a	Act	0.665166	0.623482	2.36486
fosl2	M07092	chr15:22458466-22458966	arhgef12a	0.54754	Body	0.16953	fosl2->chr15:22458466-22458966->arhgef12a	Act	2.31203	0.623482	2.36486
klf8	M07294	chr15:22458466-22458966	arhgef12a	0.0593677	Body	0.0858985	klf8->chr15:22458466-22458966->arhgef12a	Act	0.378342	0.623482	2.36486
nfic	M05745_2.00	chr15:22458466-22458966	arhgef12a	0.390606	Body	0.147495	nfic->chr15:22458466-22458966->arhgef12a	Act	2.75632	0.623482	2.36486
tcf7l1b	M09400_2.00	chr15:22458466-22458966	arhgef12a	0.417512	Body	0.170896	tcf7l1b->chr15:22458466-22458966->arhgef12a	Act	0.336061	0.623482	2.36486
sox13	M11331_2.00	chr15:22458466-22458966	arhgef12a	0.562935	Body	0.179829	sox13->chr15:22458466-22458966->arhgef12a	Act	1.40426	0.623482	2.36486
fosl2	M04328_2.00	chr15:22472112-22472612	arhgef12a	0.266536	Body	0.16953	fosl2->chr15:22472112-22472612->arhgef12a	Act	2.31203	0.623482	3.16459
fosl2	M00925	chr15:22446048-22446548	arhgef12a	0.522926	Inter	0.16953	fosl2->chr15:22446048-22446548->arhgef12a	Act	2.31203	0.623482	0
e2f3	M07083	chr15:22446048-22446548	arhgef12a	0.161533	Inter	0.113739	e2f3->chr15:22446048-22446548->arhgef12a	Act	0.665166	0.623482	0
erf	M08691	chr15:22446048-22446548	arhgef12a	0.114006	Inter	0.143933	erf->chr15:22446048-22446548->arhgef12a	Act	0.721766	0.623482	0
erfl3	M04709_2.00	chr15:22446048-22446548	arhgef12a	0.198175	Inter	0.171081	erfl3->chr15:22446048-22446548->arhgef12a	Act	1.01761	0.623482	0
sox13	M05791_2.00	chr15:22446048-22446548	arhgef12a	0.531603	Inter	0.179829	sox13->chr15:22446048-22446548->arhgef12a	Act	1.40426	0.623482	0
klf8	M08965_2.00	chr15:22446048-22446548	arhgef12a	0.0987561	Inter	0.0858985	klf8->chr15:22446048-22446548->arhgef12a	Act	0.378342	0.623482	0
erf	M08691	chr15:22571054-22571554	arhgef12a	0.114006	Inter	0.143933	erf->chr15:22571054-22571554->arhgef12a	Act	0.721766	0.623482	5.76506
tcf7l1a	M10400	chr15:22571054-22571554	arhgef12a	0.0747388	Inter	0.159917	tcf7l1a->chr15:22571054-22571554->arhgef12a	Act	0.749125	0.623482	5.76506
tcf7l1b	M00200_2.00	chr15:22571054-22571554	arhgef12a	0.0530075	Inter	0.170896	tcf7l1b->chr15:22571054-22571554->arhgef12a	Act	0.336061	0.623482	5.76506
fosl2	M08069_2.00	chr15:22571054-22571554	arhgef12a	0.550759	Inter	0.16953	fosl2->chr15:22571054-22571554->arhgef12a	Act	2.31203	0.623482	5.76506
e2f3	M09036_2.00	chr15:22571054-22571554	arhgef12a	0.131462	Inter	0.113739	e2f3->chr15:22571054-22571554->arhgef12a	Act	0.665166	0.623482	5.76506
klf8	M07294	chr15:22574034-22574534	arhgef12a	0.0593677	Inter	0.0858985	klf8->chr15:22574034-22574534->arhgef12a	Act	0.378342	0.623482	1.33965
nfic	M09385_2.00	chr15:22574034-22574534	arhgef12a	0.403628	Inter	0.147495	nfic->chr15:22574034-22574534->arhgef12a	Act	2.75632	0.623482	1.33965
klf8	M05551	chr15:22610662-22611162	arhgef12a	0.0631323	Inter	0.0858985	klf8->chr15:22610662-22611162->arhgef12a	Act	0.378342	0.623482	5.46532
erf	M08881	chr15:22610662-22611162	arhgef12a	0.220012	Inter	0.143933	erf->chr15:22610662-22611162->arhgef12a	Act	0.721766	0.623482	5.46532
tcf7l1a	M05755_2.00	chr15:22610662-22611162	arhgef12a	0.095305	Inter	0.159917	tcf7l1a->chr15:22610662-22611162->arhgef12a	Act	0.749125	0.623482	5.46532
tcf7l1b	M05755_2.00	chr15:22610662-22611162	arhgef12a	0.161238	Inter	0.170896	tcf7l1b->chr15:22610662-22611162->arhgef12a	Act	0.336061	0.623482	5.46532
erfl3	M09052_2.00	chr15:22610662-22611162	arhgef12a	0.231018	Inter	0.171081	erfl3->chr15:22610662-22611162->arhgef12a	Act	1.01761	0.623482	5.46532
stat3	M01595	chr15:22625204-22625704	arhgef12a	0.36922	Inter	0.138802	stat3->chr15:22625204-22625704->arhgef12a	Act	1.70202	0.623482	0
fosl2	M03870	chr15:22630398-22630898	arhgef12a	0.542626	Inter	0.16953	fosl2->chr15:22630398-22630898->arhgef12a	Act	2.31203	0.623482	5.50618
sox13	M09391_2.00	chr15:22630398-22630898	arhgef12a	0.587442	Inter	0.179829	sox13->chr15:22630398-22630898->arhgef12a	Act	1.40426	0.623482	5.50618
myb	M09601_2.00	chr15:22630398-22630898	arhgef12a	0.216188	Inter	0.154635	myb->chr15:22630398-22630898->arhgef12a	Act	1.14685	0.623482	5.50618
mybl1	M09601_2.00	chr15:22630398-22630898	arhgef12a	0.322532	Inter	0.167919	mybl1->chr15:22630398-22630898->arhgef12a	Act	1.69618	0.623482	5.50618
tcf7l1a	M00805	chr15:22633712-22634212	arhgef12a	0.191918	Inter	0.159917	tcf7l1a->chr15:22633712-22634212->arhgef12a	Act	0.749125	0.623482	0
tcf7l1b	M04005	chr15:22633712-22634212	arhgef12a	0.0980496	Inter	0.170896	tcf7l1b->chr15:22633712-22634212->arhgef12a	Act	0.336061	0.623482	0
erf	M08111_2.00	chr15:22633712-22634212	arhgef12a	0.257322	Inter	0.143933	erf->chr15:22633712-22634212->arhgef12a	Act	0.721766	0.623482	0
erfl3	M08111_2.00	chr15:22633712-22634212	arhgef12a	0.320573	Inter	0.171081	erfl3->chr15:22633712-22634212->arhgef12a	Act	1.01761	0.623482	0
klf8	M08879_2.00	chr15:22633712-22634212	arhgef12a	0.057518	Inter	0.0858985	klf8->chr15:22633712-22634212->arhgef12a	Act	0.378342	0.623482	0
stat3	M00777	chr15:22636736-22637236	arhgef12a	0.207571	Inter	0.138802	stat3->chr15:22636736-22637236->arhgef12a	Act	1.70202	0.623482	4.41386
fosl2	M00924	chr15:22636736-22637236	arhgef12a	0.534263	Inter	0.16953	fosl2->chr15:22636736-22637236->arhgef12a	Act	2.31203	0.623482	4.41386
sox13	M09388_2.00	chr15:22636736-22637236	arhgef12a	0.566188	Inter	0.179829	sox13->chr15:22636736-22637236->arhgef12a	Act	1.40426	0.623482	4.41386
tcf7l1a	M09400_2.00	chr15:22636736-22637236	arhgef12a	0.347609	Inter	0.159917	tcf7l1a->chr15:22636736-22637236->arhgef12a	Act	0.749125	0.623482	4.41386
tcf7l1b	M09400_2.00	chr15:22636736-22637236	arhgef12a	0.417512	Inter	0.170896	tcf7l1b->chr15:22636736-22637236->arhgef12a	Act	0.336061	0.623482	4.41386
nfic	M03475_2.00	chr5:58763440-58763940	arhgef12b	0.409764	Body	0.416831	nfic->chr5:58763440-58763940->arhgef12b	Act	2.75632	1.17567	0
rfx2	M09363_2.00	chr5:58763440-58763940	arhgef12b	0.347511	Body	0.376631	rfx2->chr5:58763440-58763940->arhgef12b	Act	1.13253	1.17567	0
tcf7l1a	M00805	chr5:58791692-58792192	arhgef12b	0.191918	Body	0.373671	tcf7l1a->chr5:58791692-58792192->arhgef12b	Act	0.749125	1.17567	0
sox8a	M03969_2.00	chr5:58791692-58792192	arhgef12b	0.277766	Body	0.333026	sox8a->chr5:58791692-58792192->arhgef12b	Act	1.14831	1.17567	0
sox2	M03969_2.00	chr5:58791692-58792192	arhgef12b	0.295492	Body	0.441549	sox2->chr5:58791692-58792192->arhgef12b	Act	0.777717	1.17567	0
sox13	M03969_2.00	chr5:58791692-58792192	arhgef12b	0.376917	Body	0.545432	sox13->chr5:58791692-58792192->arhgef12b	Act	1.40426	1.17567	0
erfl3	M09078_2.00	chr5:58802409-58802909	arhgef12b	0.24124	Body	0.399165	erfl3->chr5:58802409-58802909->arhgef12b	Act	1.01761	1.17567	0
fosl2	M00925	chr5:58812764-58813264	arhgef12b	0.522926	Body	0.40258	fosl2->chr5:58812764-58813264->arhgef12b	Act	2.31203	1.17567	3.59902
sox8a	M00202_2.00	chr5:58812764-58813264	arhgef12b	0.170673	Body	0.333026	sox8a->chr5:58812764-58813264->arhgef12b	Act	1.14831	1.17567	3.59902
sox2	M00202_2.00	chr5:58812764-58813264	arhgef12b	0.184973	Body	0.441549	sox2->chr5:58812764-58813264->arhgef12b	Act	0.777717	1.17567	3.59902
sox13	M00202_2.00	chr5:58812764-58813264	arhgef12b	0.23053	Body	0.545432	sox13->chr5:58812764-58813264->arhgef12b	Act	1.40426	1.17567	3.59902
nfic	M03477_2.00	chr5:58812764-58813264	arhgef12b	0.161119	Body	0.416831	nfic->chr5:58812764-58813264->arhgef12b	Act	2.75632	1.17567	3.59902
rfx2	M04095	chr5:58813418-58813918	arhgef12b	0.358754	Body	0.376631	rfx2->chr5:58813418-58813918->arhgef12b	Act	1.13253	1.17567	3.72288
sox8a	M03487_2.00	chr5:58813418-58813918	arhgef12b	0.0815095	Body	0.333026	sox8a->chr5:58813418-58813918->arhgef12b	Act	1.14831	1.17567	3.72288
sox2	M03487_2.00	chr5:58813418-58813918	arhgef12b	0.109219	Body	0.441549	sox2->chr5:58813418-58813918->arhgef12b	Act	0.777717	1.17567	3.72288
sox13	M03487_2.00	chr5:58813418-58813918	arhgef12b	0.137222	Body	0.545432	sox13->chr5:58813418-58813918->arhgef12b	Act	1.40426	1.17567	3.72288
erfl3	M04728_2.00	chr5:58813418-58813918	arhgef12b	0.131437	Body	0.399165	erfl3->chr5:58813418-58813918->arhgef12b	Act	1.01761	1.17567	3.72288
tcf7l1a	M01594	chr5:58821789-58822289	arhgef12b	0.328895	Body	0.373671	tcf7l1a->chr5:58821789-58822289->arhgef12b	Act	0.749125	1.17567	2.72816
sox2	M07432	chr5:58821789-58822289	arhgef12b	0.3261	Body	0.441549	sox2->chr5:58821789-58822289->arhgef12b	Act	0.777717	1.17567	2.72816
fosl2	M08932	chr5:58821789-58822289	arhgef12b	0.251979	Body	0.40258	fosl2->chr5:58821789-58822289->arhgef12b	Act	2.31203	1.17567	2.72816
rfx2	M00066_2.00	chr5:58821789-58822289	arhgef12b	0.133984	Body	0.376631	rfx2->chr5:58821789-58822289->arhgef12b	Act	1.13253	1.17567	2.72816
sox8a	M00208_2.00	chr5:58821789-58822289	arhgef12b	0.170673	Body	0.333026	sox8a->chr5:58821789-58822289->arhgef12b	Act	1.14831	1.17567	2.72816
sox13	M00208_2.00	chr5:58821789-58822289	arhgef12b	0.23053	Body	0.545432	sox13->chr5:58821789-58822289->arhgef12b	Act	1.40426	1.17567	2.72816
erfl3	M08111_2.00	chr5:58821789-58822289	arhgef12b	0.320573	Body	0.399165	erfl3->chr5:58821789-58822289->arhgef12b	Act	1.01761	1.17567	2.72816
tcf7l1b	M09400_2.00	chr5:58821789-58822289	arhgef12b	0.417512	Body	0.444271	tcf7l1b->chr5:58821789-58822289->arhgef12b	Act	0.336061	1.17567	2.72816
gli2a	M03902	chr5:58832068-58832568	arhgef12b	0.260418	Body	0.647523	gli2a->chr5:58832068-58832568->arhgef12b	Act	2.41799	1.17567	0
tcf7l1b	M00200_2.00	chr5:58832068-58832568	arhgef12b	0.0530075	Body	0.444271	tcf7l1b->chr5:58832068-58832568->arhgef12b	Act	0.336061	1.17567	0
gli3	M02876_2.00	chr5:58832068-58832568	arhgef12b	0.226579	Body	0.581274	gli3->chr5:58832068-58832568->arhgef12b	Act	0.96568	1.17567	0
tcf7l1a	M05890_2.00	chr5:58832068-58832568	arhgef12b	0.096236	Body	0.373671	tcf7l1a->chr5:58832068-58832568->arhgef12b	Act	0.749125	1.17567	0
fosl2	M09616	chr5:58953756-58954256	arhgef12b	0.546958	Inter	0.40258	fosl2->chr5:58953756-58954256->arhgef12b	Act	2.31203	1.17567	4.56831
sox13	M03504_2.00	chr5:58953756-58954256	arhgef12b	0.0542881	Inter	0.545432	sox13->chr5:58953756-58954256->arhgef12b	Act	1.40426	1.17567	4.56831
nfic	M05741_2.00	chr5:58953756-58954256	arhgef12b	0.42857	Inter	0.416831	nfic->chr5:58953756-58954256->arhgef12b	Act	2.75632	1.17567	4.56831
tead1a	M06455_2.00	chr5:58953756-58954256	arhgef12b	0.0660997	Inter	0.491833	tead1a->chr5:58953756-58954256->arhgef12b	Act	1.61908	1.17567	4.56831
sox2	M04541	chr2:37537688-37538188	arhgef18a	0.0853381	Body	0.190249	sox2->chr2:37537688-37538188->arhgef18a	Act	0.777717	0.53771	0
sox8a	M04547	chr2:37537688-37538188	arhgef18a	0.145362	Body	0.204149	sox8a->chr2:37537688-37538188->arhgef18a	Act	1.14831	0.53771	0
sox13	M03484_2.00	chr2:37537688-37538188	arhgef18a	0.141082	Body	0.252219	sox13->chr2:37537688-37538188->arhgef18a	Act	1.40426	0.53771	0
rarga	M09263_2.00	chr2:37537688-37538188	arhgef18a	0.0797224	Body	0.181006	rarga->chr2:37537688-37538188->arhgef18a	Act	0.588239	0.53771	0
sox8a	M03487_2.00	chr2:37303637-37304137	arhgef18a	0.0815095	Inter	0.204149	sox8a->chr2:37303637-37304137->arhgef18a	Act	1.14831	0.53771	0
sox2	M03487_2.00	chr2:37303637-37304137	arhgef18a	0.109219	Inter	0.190249	sox2->chr2:37303637-37304137->arhgef18a	Act	0.777717	0.53771	0
sox13	M03487_2.00	chr2:37303637-37304137	arhgef18a	0.137222	Inter	0.252219	sox13->chr2:37303637-37304137->arhgef18a	Act	1.40426	0.53771	0
fosl2	M03870	chr2:37320365-37320865	arhgef18a	0.542626	Inter	0.170139	fosl2->chr2:37320365-37320865->arhgef18a	Act	2.31203	0.53771	2.07892
rarga	M09618_2.00	chr2:37320365-37320865	arhgef18a	0.12645	Inter	0.181006	rarga->chr2:37320365-37320865->arhgef18a	Act	0.588239	0.53771	2.07892
sox13	M03504_2.00	chr2:37325418-37325918	arhgef18a	0.0542881	Inter	0.252219	sox13->chr2:37325418-37325918->arhgef18a	Act	1.40426	0.53771	0
sox8a	M03971_2.00	chr2:37325418-37325918	arhgef18a	0.144076	Inter	0.204149	sox8a->chr2:37325418-37325918->arhgef18a	Act	1.14831	0.53771	0
sox2	M03971_2.00	chr2:37325418-37325918	arhgef18a	0.175627	Inter	0.190249	sox2->chr2:37325418-37325918->arhgef18a	Act	0.777717	0.53771	0
tead1a	M09434_2.00	chr2:37325418-37325918	arhgef18a	0.358917	Inter	0.223565	tead1a->chr2:37325418-37325918->arhgef18a	Act	1.61908	0.53771	0
rarga	M00820_2.00	chr2:37357584-37358084	arhgef18a	0.114095	Inter	0.181006	rarga->chr2:37357584-37358084->arhgef18a	Act	0.588239	0.53771	0
fosl2	M07092	chr2:37665344-37665844	arhgef18a	0.54754	Inter	0.170139	fosl2->chr2:37665344-37665844->arhgef18a	Act	2.31203	0.53771	3.07812
fosl2	M00926	chr2:37728469-37728969	arhgef18a	0.528779	Inter	0.170139	fosl2->chr2:37728469-37728969->arhgef18a	Act	2.31203	0.53771	3.39316
sox8a	M03487_2.00	chr2:37728469-37728969	arhgef18a	0.0815095	Inter	0.204149	sox8a->chr2:37728469-37728969->arhgef18a	Act	1.14831	0.53771	3.39316
sox2	M03487_2.00	chr2:37728469-37728969	arhgef18a	0.109219	Inter	0.190249	sox2->chr2:37728469-37728969->arhgef18a	Act	0.777717	0.53771	3.39316
sox13	M03487_2.00	chr2:37728469-37728969	arhgef18a	0.137222	Inter	0.252219	sox13->chr2:37728469-37728969->arhgef18a	Act	1.40426	0.53771	3.39316
sox8a	M03487_2.00	chr2:37758779-37759279	arhgef18a	0.0815095	Inter	0.204149	sox8a->chr2:37758779-37759279->arhgef18a	Act	1.14831	0.53771	0
sox2	M03487_2.00	chr2:37758779-37759279	arhgef18a	0.109219	Inter	0.190249	sox2->chr2:37758779-37759279->arhgef18a	Act	0.777717	0.53771	0
sox13	M03487_2.00	chr2:37758779-37759279	arhgef18a	0.137222	Inter	0.252219	sox13->chr2:37758779-37759279->arhgef18a	Act	1.40426	0.53771	0
rarga	M03562	chr2:37771221-37771721	arhgef18a	0.0655841	Inter	0.181006	rarga->chr2:37771221-37771721->arhgef18a	Act	0.588239	0.53771	0
sox2	M04539	chr2:37771221-37771721	arhgef18a	0.170095	Inter	0.190249	sox2->chr2:37771221-37771721->arhgef18a	Act	0.777717	0.53771	0
stat3	M09714	chr2:37771221-37771721	arhgef18a	0.305177	Inter	0.191033	stat3->chr2:37771221-37771721->arhgef18a	Act	1.70202	0.53771	0
sox8a	M03522_2.00	chr2:37771221-37771721	arhgef18a	0.228176	Inter	0.204149	sox8a->chr2:37771221-37771721->arhgef18a	Act	1.14831	0.53771	0
sox13	M03522_2.00	chr2:37771221-37771721	arhgef18a	0.271872	Inter	0.252219	sox13->chr2:37771221-37771721->arhgef18a	Act	1.40426	0.53771	0
tead1a	M04142	chr2:37537031-37537531	arhgef18a	0.149864	TSS	0.223565	tead1a->chr2:37537031-37537531->arhgef18a	Act	1.61908	0.53771	0
sox2	M04541	chr2:37537031-37537531	arhgef18a	0.0853381	TSS	0.190249	sox2->chr2:37537031-37537531->arhgef18a	Act	0.777717	0.53771	0
sox8a	M04547	chr2:37537031-37537531	arhgef18a	0.145362	TSS	0.204149	sox8a->chr2:37537031-37537531->arhgef18a	Act	1.14831	0.53771	0
sox13	M03484_2.00	chr2:37537031-37537531	arhgef18a	0.141082	TSS	0.252219	sox13->chr2:37537031-37537531->arhgef18a	Act	1.40426	0.53771	0
rarga	M09263_2.00	chr2:37537031-37537531	arhgef18a	0.0797224	TSS	0.181006	rarga->chr2:37537031-37537531->arhgef18a	Act	0.588239	0.53771	0
ascl1a	M08744_2.00	chr22:10885644-10886144	arhgef18b	0.0621193	Body	0.0780116	ascl1a->chr22:10885644-10886144->arhgef18b	Act	0.683363	0.545084	0
tead1a	M03576_2.00	chr22:10890812-10891312	arhgef18b	0.401935	TSS	0.0884597	tead1a->chr22:10890812-10891312->arhgef18b	Act	1.61908	0.545084	0
rarga	M07994_2.00	chr22:10890812-10891312	arhgef18b	0.0513925	TSS	0.0370764	rarga->chr22:10890812-10891312->arhgef18b	Act	0.588239	0.545084	0
nfic	M09381_2.00	chr23:27912253-27912753	ARHGEF25	0.380148	Body	0.290806	nfic->chr23:27912253-27912753->ARHGEF25	Act	2.75632	1.18171	3.24398
sox2	M01272	chr23:27928786-27929286	ARHGEF25	0.326862	Body	0.313024	sox2->chr23:27928786-27929286->ARHGEF25	Act	0.777717	1.18171	0
sox8a	M08039	chr23:27928786-27929286	ARHGEF25	0.108699	Body	0.262323	sox8a->chr23:27928786-27929286->ARHGEF25	Act	1.14831	1.18171	0
sox13	M03483_2.00	chr23:27928786-27929286	ARHGEF25	0.121407	Body	0.366461	sox13->chr23:27928786-27929286->ARHGEF25	Act	1.40426	1.18171	0
vsx2	M00437	chr23:27664075-27664575	ARHGEF25	0.0910684	Inter	0.257242	vsx2->chr23:27664075-27664575->ARHGEF25	Act	0.520062	1.18171	0.766568
sox8a	M04546	chr23:27664075-27664575	ARHGEF25	0.229255	Inter	0.262323	sox8a->chr23:27664075-27664575->ARHGEF25	Act	1.14831	1.18171	0.766568
sox2	M07225	chr23:27664075-27664575	ARHGEF25	0.414659	Inter	0.313024	sox2->chr23:27664075-27664575->ARHGEF25	Act	0.777717	1.18171	0.766568
rfx2	M07305	chr23:27664075-27664575	ARHGEF25	0.287272	Inter	0.259599	rfx2->chr23:27664075-27664575->ARHGEF25	Act	1.13253	1.18171	0.766568
sox13	M09787	chr23:27664075-27664575	ARHGEF25	0.552681	Inter	0.366461	sox13->chr23:27664075-27664575->ARHGEF25	Act	1.40426	1.18171	0.766568
nfic	M09381_2.00	chr23:27664075-27664575	ARHGEF25	0.380148	Inter	0.290806	nfic->chr23:27664075-27664575->ARHGEF25	Act	2.75632	1.18171	0.766568
tead1a	M04142	chr23:27738306-27738806	ARHGEF25	0.149864	Inter	0.331539	tead1a->chr23:27738306-27738806->ARHGEF25	Act	1.61908	1.18171	0
nfic	M09378_2.00	chr23:27738306-27738806	ARHGEF25	0.427033	Inter	0.290806	nfic->chr23:27738306-27738806->ARHGEF25	Act	2.75632	1.18171	0
fosl2	M01809_2.00	chr23:27784860-27785360	ARHGEF25	0.0742688	Inter	0.276602	fosl2->chr23:27784860-27785360->ARHGEF25	Act	2.31203	1.18171	7.05938
nfic	M03475_2.00	chr23:27784860-27785360	ARHGEF25	0.409764	Inter	0.290806	nfic->chr23:27784860-27785360->ARHGEF25	Act	2.75632	1.18171	7.05938
zic2b	M00449	chr23:27810505-27811005	ARHGEF25	0.11356	Inter	0.219851	zic2b->chr23:27810505-27811005->ARHGEF25	Act	1.25359	1.18171	0
fosl2	M00924	chr23:27810505-27811005	ARHGEF25	0.534263	Inter	0.276602	fosl2->chr23:27810505-27811005->ARHGEF25	Act	2.31203	1.18171	0
sox8a	M03973_2.00	chr23:27810505-27811005	ARHGEF25	0.23967	Inter	0.262323	sox8a->chr23:27810505-27811005->ARHGEF25	Act	1.14831	1.18171	0
sox2	M03973_2.00	chr23:27810505-27811005	ARHGEF25	0.239892	Inter	0.313024	sox2->chr23:27810505-27811005->ARHGEF25	Act	0.777717	1.18171	0
sox13	M03973_2.00	chr23:27810505-27811005	ARHGEF25	0.3116	Inter	0.366461	sox13->chr23:27810505-27811005->ARHGEF25	Act	1.40426	1.18171	0
tcf7l1b	M09392_2.00	chr23:27810505-27811005	ARHGEF25	0.40907	Inter	0.294963	tcf7l1b->chr23:27810505-27811005->ARHGEF25	Act	0.336061	1.18171	0
stat3	M00777	chr23:27883346-27883846	ARHGEF25	0.207571	Inter	0.283985	stat3->chr23:27883346-27883846->ARHGEF25	Act	1.70202	1.18171	3.76633
fosl2	M07092	chr23:27883346-27883846	ARHGEF25	0.54754	Inter	0.276602	fosl2->chr23:27883346-27883846->ARHGEF25	Act	2.31203	1.18171	3.76633
sox8a	M00203_2.00	chr23:27883346-27883846	ARHGEF25	0.294131	Inter	0.262323	sox8a->chr23:27883346-27883846->ARHGEF25	Act	1.14831	1.18171	3.76633
sox2	M00203_2.00	chr23:27883346-27883846	ARHGEF25	0.312264	Inter	0.313024	sox2->chr23:27883346-27883846->ARHGEF25	Act	0.777717	1.18171	3.76633
sox13	M00203_2.00	chr23:27883346-27883846	ARHGEF25	0.391172	Inter	0.366461	sox13->chr23:27883346-27883846->ARHGEF25	Act	1.40426	1.18171	3.76633
erfl3	M08111_2.00	chr23:27911510-27912010	ARHGEF25	0.320573	TSS	0.273632	erfl3->chr23:27911510-27912010->ARHGEF25	Act	1.01761	1.18171	3.67476
sox2	M11331_2.00	chr23:27911510-27912010	ARHGEF25	0.425179	TSS	0.313024	sox2->chr23:27911510-27912010->ARHGEF25	Act	0.777717	1.18171	3.67476
sox8a	M11331_2.00	chr23:27911510-27912010	ARHGEF25	0.448372	TSS	0.262323	sox8a->chr23:27911510-27912010->ARHGEF25	Act	1.14831	1.18171	3.67476
sox13	M11331_2.00	chr23:27911510-27912010	ARHGEF25	0.562935	TSS	0.366461	sox13->chr23:27911510-27912010->ARHGEF25	Act	1.40426	1.18171	3.67476
sox13	M03504_2.00	chr5:34875772-34876272	arhgef28a	0.0542881	Body	0.429155	sox13->chr5:34875772-34876272->arhgef28a	Act	1.40426	1.12163	0
sox8a	M11331_2.00	chr5:34875772-34876272	arhgef28a	0.448372	Body	0.500796	sox8a->chr5:34875772-34876272->arhgef28a	Act	1.14831	1.12163	0
sox8a	M00203_2.00	chr5:34878059-34878559	arhgef28a	0.294131	Body	0.500796	sox8a->chr5:34878059-34878559->arhgef28a	Act	1.14831	1.12163	0
sox13	M00203_2.00	chr5:34878059-34878559	arhgef28a	0.391172	Body	0.429155	sox13->chr5:34878059-34878559->arhgef28a	Act	1.40426	1.12163	0
sox8a	M00197_2.00	chr5:34894742-34895242	arhgef28a	0.294131	Body	0.500796	sox8a->chr5:34894742-34895242->arhgef28a	Act	1.14831	1.12163	4.63212
sox13	M00197_2.00	chr5:34894742-34895242	arhgef28a	0.391172	Body	0.429155	sox13->chr5:34894742-34895242->arhgef28a	Act	1.40426	1.12163	4.63212
sox8a	M03487_2.00	chr5:34895265-34895765	arhgef28a	0.0815095	Body	0.500796	sox8a->chr5:34895265-34895765->arhgef28a	Act	1.14831	1.12163	2.88578
sox13	M03487_2.00	chr5:34895265-34895765	arhgef28a	0.137222	Body	0.429155	sox13->chr5:34895265-34895765->arhgef28a	Act	1.40426	1.12163	2.88578
sox8a	M00202_2.00	chr5:34949299-34949799	arhgef28a	0.170673	Body	0.500796	sox8a->chr5:34949299-34949799->arhgef28a	Act	1.14831	1.12163	4.57042
sox13	M00202_2.00	chr5:34949299-34949799	arhgef28a	0.23053	Body	0.429155	sox13->chr5:34949299-34949799->arhgef28a	Act	1.40426	1.12163	4.57042
sox13	M09787	chr5:34964559-34965059	arhgef28a	0.552681	Body	0.429155	sox13->chr5:34964559-34965059->arhgef28a	Act	1.40426	1.12163	1.01279
sox8a	M00201_2.00	chr5:34964559-34965059	arhgef28a	0.19628	Body	0.500796	sox8a->chr5:34964559-34965059->arhgef28a	Act	1.14831	1.12163	1.01279
sox13	M09787	chr5:34724435-34724935	arhgef28a	0.552681	Inter	0.429155	sox13->chr5:34724435-34724935->arhgef28a	Act	1.40426	1.12163	0
sox8a	M05761_2.00	chr5:34724435-34724935	arhgef28a	0.504096	Inter	0.500796	sox8a->chr5:34724435-34724935->arhgef28a	Act	1.14831	1.12163	0
sox13	M09787	chr5:34963911-34964411	arhgef28a	0.552681	TSS	0.429155	sox13->chr5:34963911-34964411->arhgef28a	Act	1.40426	1.12163	0
sox8a	M02719_2.00	chr5:34963911-34964411	arhgef28a	0.403529	TSS	0.500796	sox8a->chr5:34963911-34964411->arhgef28a	Act	1.14831	1.12163	0
sox8a	M00201_2.00	chr5:34965112-34965612	arhgef28a	0.19628	TSS	0.500796	sox8a->chr5:34965112-34965612->arhgef28a	Act	1.14831	1.12163	0
sox13	M00201_2.00	chr5:34965112-34965612	arhgef28a	0.287812	TSS	0.429155	sox13->chr5:34965112-34965612->arhgef28a	Act	1.40426	1.12163	0
tcf7l1a	M00805	chr17:11400580-11401080	arid4a	0.191918	Body	0.127289	tcf7l1a->chr17:11400580-11401080->arid4a	Act	0.749125	0.32707	3.99692
fosl2	M03870	chr17:11400580-11401080	arid4a	0.542626	Body	0.163357	fosl2->chr17:11400580-11401080->arid4a	Act	2.31203	0.32707	3.99692
erfl3	M09080_2.00	chr17:11400580-11401080	arid4a	0.213369	Body	0.132459	erfl3->chr17:11400580-11401080->arid4a	Act	1.01761	0.32707	3.99692
tcf7l1a	M00805	chr17:11405138-11405638	arid4a	0.191918	Body	0.127289	tcf7l1a->chr17:11405138-11405638->arid4a	Act	0.749125	0.32707	3.82534
nfic	M03478_2.00	chr17:11405138-11405638	arid4a	0.410432	Body	0.115422	nfic->chr17:11405138-11405638->arid4a	Act	2.75632	0.32707	3.82534
sox13	M05759_2.00	chr17:11405138-11405638	arid4a	0.467712	Body	0.166459	sox13->chr17:11405138-11405638->arid4a	Act	1.40426	0.32707	3.82534
erfl3	M09048_2.00	chr17:11405138-11405638	arid4a	0.264324	Body	0.132459	erfl3->chr17:11405138-11405638->arid4a	Act	1.01761	0.32707	3.82534
tcf7l1b	M09386_2.00	chr17:11405138-11405638	arid4a	0.24672	Body	0.138651	tcf7l1b->chr17:11405138-11405638->arid4a	Act	0.336061	0.32707	3.82534
tcf7l1a	M04005	chr17:11185696-11186196	arid4a	0.0640349	Inter	0.127289	tcf7l1a->chr17:11185696-11186196->arid4a	Act	0.749125	0.32707	4.89457
tcf7l1b	M04005	chr17:11185696-11186196	arid4a	0.0980496	Inter	0.138651	tcf7l1b->chr17:11185696-11186196->arid4a	Act	0.336061	0.32707	4.89457
nfic	M03479_2.00	chr17:11185696-11186196	arid4a	0.406484	Inter	0.115422	nfic->chr17:11185696-11186196->arid4a	Act	2.75632	0.32707	4.89457
erfl3	M06188_2.00	chr17:11185696-11186196	arid4a	0.0780368	Inter	0.132459	erfl3->chr17:11185696-11186196->arid4a	Act	1.01761	0.32707	4.89457
sox13	M09396_2.00	chr17:11185696-11186196	arid4a	0.506998	Inter	0.166459	sox13->chr17:11185696-11186196->arid4a	Act	1.40426	0.32707	4.89457
sox13	M03513_2.00	chr17:11192659-11193159	arid4a	0.186252	Inter	0.166459	sox13->chr17:11192659-11193159->arid4a	Act	1.40426	0.32707	4.26634
foxn4	M04645	chr17:11208469-11208969	arid4a	0.110591	Inter	0.150919	foxn4->chr17:11208469-11208969->arid4a	Act	1.98217	0.32707	3.77558
nfic	M03475_2.00	chr17:11208469-11208969	arid4a	0.409764	Inter	0.115422	nfic->chr17:11208469-11208969->arid4a	Act	2.75632	0.32707	3.77558
gli2a	M05331	chr17:11216070-11216570	arid4a	0.0593127	Inter	0.215593	gli2a->chr17:11216070-11216570->arid4a	Act	2.41799	0.32707	0
gli3	M02642_2.00	chr17:11216070-11216570	arid4a	0.0680965	Inter	0.159237	gli3->chr17:11216070-11216570->arid4a	Act	0.96568	0.32707	0
tead1a	M08175_2.00	chr17:11305262-11305762	arid4a	0.417358	Inter	0.174742	tead1a->chr17:11305262-11305762->arid4a	Act	1.61908	0.32707	2.5617
tcf7l1a	M08902	chr17:11417665-11418165	arid4a	0.203955	TSS	0.127289	tcf7l1a->chr17:11417665-11418165->arid4a	Act	0.749125	0.32707	0
sox13	M03513_2.00	chr17:11417665-11418165	arid4a	0.186252	TSS	0.166459	sox13->chr17:11417665-11418165->arid4a	Act	1.40426	0.32707	0
erfl3	M09055_2.00	chr17:11417665-11418165	arid4a	0.35224	TSS	0.132459	erfl3->chr17:11417665-11418165->arid4a	Act	1.01761	0.32707	0
tcf7l1a	M00805	chr12:8184828-8185328	arid5b	0.191918	Body	0.37615	tcf7l1a->chr12:8184828-8185328->arid5b	Act	0.749125	1.55216	0
fosl2	M08923	chr12:8188076-8188576	arid5b	0.539618	Body	0.39639	fosl2->chr12:8188076-8188576->arid5b	Act	2.31203	1.55216	1.26904
sox8a	M00070_2.00	chr12:8194027-8194527	arid5b	0.197053	Body	0.378276	sox8a->chr12:8194027-8194527->arid5b	Act	1.14831	1.55216	0
sox13	M00070_2.00	chr12:8194027-8194527	arid5b	0.268754	Body	0.496575	sox13->chr12:8194027-8194527->arid5b	Act	1.40426	1.55216	0
fosl2	M08802_2.00	chr12:8194027-8194527	arid5b	0.548049	Body	0.39639	fosl2->chr12:8194027-8194527->arid5b	Act	2.31203	1.55216	0
tcf7l1a	M00805	chr12:8197506-8198006	arid5b	0.191918	Body	0.37615	tcf7l1a->chr12:8197506-8198006->arid5b	Act	0.749125	1.55216	0
tcf7l1a	M00805	chr12:8271527-8272027	arid5b	0.191918	Body	0.37615	tcf7l1a->chr12:8271527-8272027->arid5b	Act	0.749125	1.55216	3.43612
sox8a	M01014	chr12:8271527-8272027	arid5b	0.328759	Body	0.378276	sox8a->chr12:8271527-8272027->arid5b	Act	1.14831	1.55216	3.43612
sox13	M01014	chr12:8271527-8272027	arid5b	0.447704	Body	0.496575	sox13->chr12:8271527-8272027->arid5b	Act	1.40426	1.55216	3.43612
mybl1	M08890	chr12:8271527-8272027	arid5b	0.112543	Body	0.47241	mybl1->chr12:8271527-8272027->arid5b	Act	1.69618	1.55216	3.43612
mybl1	M04045	chr12:8347023-8347523	arid5b	0.0940949	Body	0.47241	mybl1->chr12:8347023-8347523->arid5b	Act	1.69618	1.55216	0
fosl2	M03870	chr12:7935062-7935562	arid5b	0.542626	Inter	0.39639	fosl2->chr12:7935062-7935562->arid5b	Act	2.31203	1.55216	4.88649
tead1a	M04142	chr12:7935062-7935562	arid5b	0.149864	Inter	0.567213	tead1a->chr12:7935062-7935562->arid5b	Act	1.61908	1.55216	4.88649
tead3b	M04143	chr12:7935062-7935562	arid5b	0.11096	Inter	0.367946	tead3b->chr12:7935062-7935562->arid5b	Act	0.518253	1.55216	4.88649
sox8a	M02912	chr12:7979469-7979969	arid5b	0.0695312	Inter	0.378276	sox8a->chr12:7979469-7979969->arid5b	Act	1.14831	1.55216	3.08908
nfic	M05741_2.00	chr12:8143621-8144121	arid5b	0.42857	Inter	0.425416	nfic->chr12:8143621-8144121->arid5b	Act	2.75632	1.55216	3.0254
tcf7l1a	M05781_2.00	chr12:8143621-8144121	arid5b	0.0730685	Inter	0.37615	tcf7l1a->chr12:8143621-8144121->arid5b	Act	0.749125	1.55216	3.0254
tcf7l1b	M05781_2.00	chr12:8143621-8144121	arid5b	0.132596	Inter	0.4539	tcf7l1b->chr12:8143621-8144121->arid5b	Act	0.336061	1.55216	3.0254
sox8a	M11331_2.00	chr12:8143621-8144121	arid5b	0.448372	Inter	0.378276	sox8a->chr12:8143621-8144121->arid5b	Act	1.14831	1.55216	3.0254
sox13	M11331_2.00	chr12:8143621-8144121	arid5b	0.562935	Inter	0.496575	sox13->chr12:8143621-8144121->arid5b	Act	1.40426	1.55216	3.0254
sox8a	M04547	chr12:8149007-8149507	arid5b	0.145362	Inter	0.378276	sox8a->chr12:8149007-8149507->arid5b	Act	1.14831	1.55216	0
sox13	M03489_2.00	chr12:8149007-8149507	arid5b	0.175082	Inter	0.496575	sox13->chr12:8149007-8149507->arid5b	Act	1.40426	1.55216	0
nfic	M09635_2.00	chr12:8149007-8149507	arid5b	0.305547	Inter	0.425416	nfic->chr12:8149007-8149507->arid5b	Act	2.75632	1.55216	0
nfic	M09381_2.00	chr12:8166501-8167001	arid5b	0.380148	Inter	0.425416	nfic->chr12:8166501-8167001->arid5b	Act	2.75632	1.55216	0
gli2a	M02641_2.00	chr6:13375446-13375946	arl6ip6	0.0629451	Body	0.115495	gli2a->chr6:13375446-13375946->arl6ip6	Act	2.41799	0.486776	0
zic2b	M04492_2.00	chr6:13375446-13375946	arl6ip6	0.192345	Body	0.108886	zic2b->chr6:13375446-13375946->arl6ip6	Act	1.25359	0.486776	0
tcf7l1a	M00805	chr6:13167269-13167769	arl6ip6	0.191918	Inter	0.107507	tcf7l1a->chr6:13167269-13167769->arl6ip6	Act	0.749125	0.486776	3.70569
mybl1	M02884	chr6:13167269-13167769	arl6ip6	0.211325	Inter	0.122464	mybl1->chr6:13167269-13167769->arl6ip6	Act	1.69618	0.486776	3.70569
tcf7l1b	M09394_2.00	chr6:13167269-13167769	arl6ip6	0.171154	Inter	0.10813	tcf7l1b->chr6:13167269-13167769->arl6ip6	Act	0.336061	0.486776	3.70569
esr2a	M09604_2.00	chr6:13167269-13167769	arl6ip6	0.0823319	Inter	0.0972866	esr2a->chr6:13167269-13167769->arl6ip6	Act	1.11001	0.486776	3.70569
tcf7l1a	M00712_2.00	chr6:13519259-13519759	arl6ip6	0.281625	Inter	0.107507	tcf7l1a->chr6:13519259-13519759->arl6ip6	Act	0.749125	0.486776	5.32901
tcf7l1b	M00712_2.00	chr6:13519259-13519759	arl6ip6	0.318582	Inter	0.10813	tcf7l1b->chr6:13519259-13519759->arl6ip6	Act	0.336061	0.486776	5.32901
zic2b	M00449	chr6:13375972-13376472	arl6ip6	0.11356	TSS	0.108886	zic2b->chr6:13375972-13376472->arl6ip6	Act	1.25359	0.486776	0
nfixa	M02050	chr7:65863653-65864153	arntl1b	0.288932	Inter	0.0549948	nfixa->chr7:65863653-65864153->arntl1b	Act	2.03913	0.740375	1.78089
fosl2	M08924	chr7:65891279-65891779	arntl1b	0.229156	Inter	0.0873702	fosl2->chr7:65891279-65891779->arntl1b	Act	2.31203	0.740375	0
foxp1a	M03753_2.00	chr7:65891279-65891779	arntl1b	0.123515	Inter	0.069335	foxp1a->chr7:65891279-65891779->arntl1b	Act	0.748865	0.740375	0
tcf3b	M04138_2.00	chr7:65891279-65891779	arntl1b	0.101922	Inter	0.0405905	tcf3b->chr7:65891279-65891779->arntl1b	Act	0.685194	0.740375	0
tcf3b	M00118_2.00	chr7:66047108-66047608	arntl1b	0.0942783	TSS	0.0405905	tcf3b->chr7:66047108-66047608->arntl1b	Act	0.685194	0.740375	0
foxp1a	M07095	chr7:66048398-66048898	arntl1b	0.164511	TSS	0.069335	foxp1a->chr7:66048398-66048898->arntl1b	Act	0.748865	0.740375	0
tcf3b	M04137_2.00	chr7:66048398-66048898	arntl1b	0.0934004	TSS	0.0405905	tcf3b->chr7:66048398-66048898->arntl1b	Act	0.685194	0.740375	0
sox8a	M05783_2.00	chr7:25956128-25956628	arrb2b	0.392668	Body	0.207025	sox8a->chr7:25956128-25956628->arrb2b	Act	1.14831	1.09241	3.39365
sox8a	M02912	chr7:25970915-25971415	arrb2b	0.0695312	Body	0.207025	sox8a->chr7:25970915-25971415->arrb2b	Act	1.14831	1.09241	3.95683
sox8a	M03976_2.00	chr7:25720148-25720648	arrb2b	0.334215	Inter	0.207025	sox8a->chr7:25720148-25720648->arrb2b	Act	1.14831	1.09241	3.96072
sox8a	M05790_2.00	chr7:25747198-25747698	arrb2b	0.342321	Inter	0.207025	sox8a->chr7:25747198-25747698->arrb2b	Act	1.14831	1.09241	0
sox8a	M00205_2.00	chr7:25756483-25756983	arrb2b	0.269599	Inter	0.207025	sox8a->chr7:25756483-25756983->arrb2b	Act	1.14831	1.09241	0
sox8a	M00205_2.00	chr7:25757002-25757502	arrb2b	0.269599	Inter	0.207025	sox8a->chr7:25757002-25757502->arrb2b	Act	1.14831	1.09241	0
sox8a	M08041_2.00	chr7:25804413-25804913	arrb2b	0.280954	Inter	0.207025	sox8a->chr7:25804413-25804913->arrb2b	Act	1.14831	1.09241	0
sox8a	M11332_2.00	chr7:26155380-26155880	arrb2b	0.276337	Inter	0.207025	sox8a->chr7:26155380-26155880->arrb2b	Act	1.14831	1.09241	0
sox2	M04541	chr11:13524236-13524736	arrdc2	0.0853381	Body	0.122668	sox2->chr11:13524236-13524736->arrdc2	Act	0.777717	0.354399	0
sox13	M03484_2.00	chr11:13524236-13524736	arrdc2	0.141082	Body	0.145919	sox13->chr11:13524236-13524736->arrdc2	Act	1.40426	0.354399	0
sox2	M02246	chr11:13527697-13528197	arrdc2	0.217687	Body	0.122668	sox2->chr11:13527697-13528197->arrdc2	Act	0.777717	0.354399	1.95201
sox13	M06559_2.00	chr11:13527697-13528197	arrdc2	0.528252	Body	0.145919	sox13->chr11:13527697-13528197->arrdc2	Act	1.40426	0.354399	1.95201
rfx2	M09365_2.00	chr11:13527697-13528197	arrdc2	0.293158	Body	0.115177	rfx2->chr11:13527697-13528197->arrdc2	Act	1.13253	0.354399	1.95201
sox2	M02246	chr11:13528199-13528699	arrdc2	0.217687	Body	0.122668	sox2->chr11:13528199-13528699->arrdc2	Act	0.777717	0.354399	1.28977
sox13	M00213_2.00	chr11:13528199-13528699	arrdc2	0.486407	Body	0.145919	sox13->chr11:13528199-13528699->arrdc2	Act	1.40426	0.354399	1.28977
foxp1a	M03753_2.00	chr11:13528199-13528699	arrdc2	0.123515	Body	0.0912006	foxp1a->chr11:13528199-13528699->arrdc2	Act	0.748865	0.354399	1.28977
sox2	M00213_2.00	chr11:13528711-13529211	arrdc2	0.382499	Body	0.122668	sox2->chr11:13528711-13529211->arrdc2	Act	0.777717	0.354399	0
sox13	M00213_2.00	chr11:13528711-13529211	arrdc2	0.486407	Body	0.145919	sox13->chr11:13528711-13529211->arrdc2	Act	1.40426	0.354399	0
sox2	M02246	chr11:13329969-13330469	arrdc2	0.217687	Inter	0.122668	sox2->chr11:13329969-13330469->arrdc2	Act	0.777717	0.354399	4.23999
fosl2	M03870	chr11:13329969-13330469	arrdc2	0.542626	Inter	0.122422	fosl2->chr11:13329969-13330469->arrdc2	Act	2.31203	0.354399	4.23999
rfx2	M04096	chr11:13329969-13330469	arrdc2	0.209823	Inter	0.115177	rfx2->chr11:13329969-13330469->arrdc2	Act	1.13253	0.354399	4.23999
junbb	M09631	chr11:13329969-13330469	arrdc2	0.338561	Inter	0.0595114	junbb->chr11:13329969-13330469->arrdc2	Act	0.837658	0.354399	4.23999
foxp1a	M09855	chr11:13329969-13330469	arrdc2	0.215055	Inter	0.0912006	foxp1a->chr11:13329969-13330469->arrdc2	Act	0.748865	0.354399	4.23999
sox13	M02719_2.00	chr11:13329969-13330469	arrdc2	0.532837	Inter	0.145919	sox13->chr11:13329969-13330469->arrdc2	Act	1.40426	0.354399	4.23999
sox2	M08899	chr11:13738569-13739069	arrdc2	0.374741	Inter	0.122668	sox2->chr11:13738569-13739069->arrdc2	Act	0.777717	0.354399	0
sox13	M08899	chr11:13738569-13739069	arrdc2	0.46894	Inter	0.145919	sox13->chr11:13738569-13739069->arrdc2	Act	1.40426	0.354399	0
fosl2	M07827_2.00	chr11:13750492-13750992	arrdc2	0.548307	Inter	0.122422	fosl2->chr11:13750492-13750992->arrdc2	Act	2.31203	0.354399	3.23595
fosl2	M03870	chr10:43755454-43755954	arrdc3b	0.542626	Inter	0.0950296	fosl2->chr10:43755454-43755954->arrdc3b	Act	2.31203	0.487055	0
junbb	M09631	chr10:43755454-43755954	arrdc3b	0.338561	Inter	0.0734821	junbb->chr10:43755454-43755954->arrdc3b	Act	0.837658	0.487055	0
erf	M04729_2.00	chr10:43755454-43755954	arrdc3b	0.0538826	Inter	0.0649009	erf->chr10:43755454-43755954->arrdc3b	Act	0.721766	0.487055	0
rarga	M09294_2.00	chr10:43755454-43755954	arrdc3b	0.243923	Inter	0.06093	rarga->chr10:43755454-43755954->arrdc3b	Act	0.588239	0.487055	0
ascl1a	M08730_2.00	chr10:43969446-43969946	arrdc3b	0.0853244	Inter	0.0880731	ascl1a->chr10:43969446-43969946->arrdc3b	Act	0.683363	0.487055	0
junbb	M08944	chr10:43971411-43971911	arrdc3b	0.330454	Inter	0.0734821	junbb->chr10:43971411-43971911->arrdc3b	Act	0.837658	0.487055	2.24162
fosl2	M03870	chr10:43770747-43771247	arrdc3b	0.542626	TSS	0.0950296	fosl2->chr10:43770747-43771247->arrdc3b	Act	2.31203	0.487055	0
fosl2	M03870	chr10:43771268-43771768	arrdc3b	0.542626	TSS	0.0950296	fosl2->chr10:43771268-43771768->arrdc3b	Act	2.31203	0.487055	0
fosl2	M07092	chr17:27222394-27222894	asap3	0.54754	Body	0.319125	fosl2->chr17:27222394-27222894->asap3	Act	2.31203	1.01807	5.28167
tcf7l1a	M11337_2.00	chr17:27222394-27222894	asap3	0.13429	Body	0.287305	tcf7l1a->chr17:27222394-27222894->asap3	Act	0.749125	1.01807	5.28167
tcf7l1b	M11337_2.00	chr17:27222394-27222894	asap3	0.135574	Body	0.308762	tcf7l1b->chr17:27222394-27222894->asap3	Act	0.336061	1.01807	5.28167
sox2	M07225	chr17:27233753-27234253	asap3	0.414659	Body	0.369696	sox2->chr17:27233753-27234253->asap3	Act	0.777717	1.01807	4.20166
sox8a	M01026_2.00	chr17:27233753-27234253	asap3	0.365741	Body	0.242269	sox8a->chr17:27233753-27234253->asap3	Act	1.14831	1.01807	4.20166
sox13	M01026_2.00	chr17:27233753-27234253	asap3	0.499614	Body	0.397611	sox13->chr17:27233753-27234253->asap3	Act	1.40426	1.01807	4.20166
erfl3	M07950_2.00	chr17:27233753-27234253	asap3	0.055452	Body	0.331938	erfl3->chr17:27233753-27234253->asap3	Act	1.01761	1.01807	4.20166
sox8a	M03487_2.00	chr17:27235530-27236030	asap3	0.0815095	Body	0.242269	sox8a->chr17:27235530-27236030->asap3	Act	1.14831	1.01807	1.33608
sox2	M03487_2.00	chr17:27235530-27236030	asap3	0.109219	Body	0.369696	sox2->chr17:27235530-27236030->asap3	Act	0.777717	1.01807	1.33608
sox13	M03487_2.00	chr17:27235530-27236030	asap3	0.137222	Body	0.397611	sox13->chr17:27235530-27236030->asap3	Act	1.40426	1.01807	1.33608
rarga	M03928_2.00	chr17:27235530-27236030	asap3	0.237411	Body	0.248738	rarga->chr17:27235530-27236030->asap3	Act	0.588239	1.01807	1.33608
fosl2	M04336_2.00	chr17:27235530-27236030	asap3	0.522506	Body	0.319125	fosl2->chr17:27235530-27236030->asap3	Act	2.31203	1.01807	1.33608
tcf7l1a	M00805	chr17:27416196-27416696	asap3	0.191918	Inter	0.287305	tcf7l1a->chr17:27416196-27416696->asap3	Act	0.749125	1.01807	2.1153
fosl2	M00925	chr17:27416196-27416696	asap3	0.522926	Inter	0.319125	fosl2->chr17:27416196-27416696->asap3	Act	2.31203	1.01807	2.1153
sox2	M04541	chr17:27416196-27416696	asap3	0.0853381	Inter	0.369696	sox2->chr17:27416196-27416696->asap3	Act	0.777717	1.01807	2.1153
sox8a	M04547	chr17:27416196-27416696	asap3	0.145362	Inter	0.242269	sox8a->chr17:27416196-27416696->asap3	Act	1.14831	1.01807	2.1153
tcf7l1b	M00712_2.00	chr17:27416196-27416696	asap3	0.318582	Inter	0.308762	tcf7l1b->chr17:27416196-27416696->asap3	Act	0.336061	1.01807	2.1153
sox13	M03489_2.00	chr17:27416196-27416696	asap3	0.175082	Inter	0.397611	sox13->chr17:27416196-27416696->asap3	Act	1.40426	1.01807	2.1153
tead1a	M03996_2.00	chr17:27416196-27416696	asap3	0.38626	Inter	0.361813	tead1a->chr17:27416196-27416696->asap3	Act	1.61908	1.01807	2.1153
erfl3	M07957_2.00	chr17:27416196-27416696	asap3	0.123519	Inter	0.331938	erfl3->chr17:27416196-27416696->asap3	Act	1.01761	1.01807	2.1153
tbx4	M08044_2.00	chr17:27416196-27416696	asap3	0.0681281	Inter	0.267414	tbx4->chr17:27416196-27416696->asap3	Act	0.88484	1.01807	2.1153
rarga	M09301_2.00	chr17:27416196-27416696	asap3	0.0552014	Inter	0.248738	rarga->chr17:27416196-27416696->asap3	Act	0.588239	1.01807	2.1153
nfic	M03475_2.00	chr17:27444532-27445032	asap3	0.409764	Inter	0.285131	nfic->chr17:27444532-27445032->asap3	Act	2.75632	1.01807	0
tcf7l1a	M00805	chr4:17416834-17417334	ascl1a	0.191918	Body	0.330351	tcf7l1a->chr4:17416834-17417334->ascl1a	Act	0.749125	0.683363	1.12706
junbb	M09963	chr4:17416834-17417334	ascl1a	0.339416	Body	0.306578	junbb->chr4:17416834-17417334->ascl1a	Act	0.837658	0.683363	1.12706
junbb	M09963	chr4:17417379-17417879	ascl1a	0.339416	Body	0.306578	junbb->chr4:17417379-17417879->ascl1a	Act	0.837658	0.683363	0
fosl2	M04338_2.00	chr4:17417379-17417879	ascl1a	0.15978	Body	0.389304	fosl2->chr4:17417379-17417879->ascl1a	Act	2.31203	0.683363	0
tcf7l1a	M00805	chr4:17418424-17418924	ascl1a	0.191918	Body	0.330351	tcf7l1a->chr4:17418424-17418924->ascl1a	Act	0.749125	0.683363	0
junbb	M00924	chr4:17418424-17418924	ascl1a	0.332304	Body	0.306578	junbb->chr4:17418424-17418924->ascl1a	Act	0.837658	0.683363	0
fosl2	M00924	chr4:17418424-17418924	ascl1a	0.534263	Body	0.389304	fosl2->chr4:17418424-17418924->ascl1a	Act	2.31203	0.683363	0
esr2a	M09611_2.00	chr4:17418424-17418924	ascl1a	0.0532612	Body	0.333868	esr2a->chr4:17418424-17418924->ascl1a	Act	1.11001	0.683363	0
sox2	M02488_2.00	chr4:17170852-17171352	ascl1a	0.267945	Inter	0.269711	sox2->chr4:17170852-17171352->ascl1a	Act	0.777717	0.683363	4.64691
tcf7l1a	M09400_2.00	chr4:17170852-17171352	ascl1a	0.347609	Inter	0.330351	tcf7l1a->chr4:17170852-17171352->ascl1a	Act	0.749125	0.683363	4.64691
esr2a	M02404_2.00	chr4:17210684-17211184	ascl1a	0.0975101	Inter	0.333868	esr2a->chr4:17210684-17211184->ascl1a	Act	1.11001	0.683363	2.73177
sox2	M05759_2.00	chr4:17210684-17211184	ascl1a	0.340395	Inter	0.269711	sox2->chr4:17210684-17211184->ascl1a	Act	0.777717	0.683363	2.73177
runx1	M08163_2.00	chr4:17210684-17211184	ascl1a	0.252454	Inter	0.334331	runx1->chr4:17210684-17211184->ascl1a	Act	1.51009	0.683363	2.73177
myb	M00913	chr4:17224604-17225104	ascl1a	0.191004	Inter	0.278268	myb->chr4:17224604-17225104->ascl1a	Act	1.14685	0.683363	4.36024
mybl1	M08890	chr4:17224604-17225104	ascl1a	0.112543	Inter	0.417075	mybl1->chr4:17224604-17225104->ascl1a	Act	1.69618	0.683363	4.36024
junbb	M08925	chr4:17224604-17225104	ascl1a	0.336402	Inter	0.306578	junbb->chr4:17224604-17225104->ascl1a	Act	0.837658	0.683363	4.36024
sox2	M03537_2.00	chr4:17224604-17225104	ascl1a	0.0888912	Inter	0.269711	sox2->chr4:17224604-17225104->ascl1a	Act	0.777717	0.683363	4.36024
fosl2	M09490_2.00	chr4:17224604-17225104	ascl1a	0.539941	Inter	0.389304	fosl2->chr4:17224604-17225104->ascl1a	Act	2.31203	0.683363	4.36024
runx1	M00271	chr4:17227029-17227529	ascl1a	0.148862	Inter	0.334331	runx1->chr4:17227029-17227529->ascl1a	Act	1.51009	0.683363	4.99456
erf	M00771	chr4:17227029-17227529	ascl1a	0.179361	Inter	0.249718	erf->chr4:17227029-17227529->ascl1a	Act	0.721766	0.683363	4.99456
junbb	M09631	chr4:17227029-17227529	ascl1a	0.338561	Inter	0.306578	junbb->chr4:17227029-17227529->ascl1a	Act	0.837658	0.683363	4.99456
fosl2	M10237	chr4:17227029-17227529	ascl1a	0.549716	Inter	0.389304	fosl2->chr4:17227029-17227529->ascl1a	Act	2.31203	0.683363	4.99456
erfl3	M09052_2.00	chr4:17227029-17227529	ascl1a	0.231018	Inter	0.289189	erfl3->chr4:17227029-17227529->ascl1a	Act	1.01761	0.683363	4.99456
myb	M02883	chr4:17399878-17400378	ascl1a	0.191164	Inter	0.278268	myb->chr4:17399878-17400378->ascl1a	Act	1.14685	0.683363	2.37927
mybl1	M02884	chr4:17399878-17400378	ascl1a	0.211325	Inter	0.417075	mybl1->chr4:17399878-17400378->ascl1a	Act	1.69618	0.683363	2.37927
sox2	M06449_2.00	chr4:17399878-17400378	ascl1a	0.431873	Inter	0.269711	sox2->chr4:17399878-17400378->ascl1a	Act	0.777717	0.683363	2.37927
myb	M00773	chr4:17419209-17419709	ascl1a	0.193333	Inter	0.278268	myb->chr4:17419209-17419709->ascl1a	Act	1.14685	0.683363	0
fosl2	M08915	chr4:17419209-17419709	ascl1a	0.207604	Inter	0.389304	fosl2->chr4:17419209-17419709->ascl1a	Act	2.31203	0.683363	0
junbb	M08921	chr4:17419209-17419709	ascl1a	0.184471	Inter	0.306578	junbb->chr4:17419209-17419709->ascl1a	Act	0.837658	0.683363	0
sox2	M03545_2.00	chr4:17419209-17419709	ascl1a	0.105397	Inter	0.269711	sox2->chr4:17419209-17419709->ascl1a	Act	0.777717	0.683363	0
junbb	M00924	chr4:17594288-17594788	ascl1a	0.332304	Inter	0.306578	junbb->chr4:17594288-17594788->ascl1a	Act	0.837658	0.683363	5.62882
fosl2	M00924	chr4:17594288-17594788	ascl1a	0.534263	Inter	0.389304	fosl2->chr4:17594288-17594788->ascl1a	Act	2.31203	0.683363	5.62882
rfx2	M03962_2.00	chr4:17594288-17594788	ascl1a	0.138106	Inter	0.348978	rfx2->chr4:17594288-17594788->ascl1a	Act	1.13253	0.683363	5.62882
sox2	M05767_2.00	chr4:17594288-17594788	ascl1a	0.383349	Inter	0.269711	sox2->chr4:17594288-17594788->ascl1a	Act	0.777717	0.683363	5.62882
erf	M08242	chr4:17631019-17631519	ascl1a	0.113271	Inter	0.249718	erf->chr4:17631019-17631519->ascl1a	Act	0.721766	0.683363	4.51391
olig2	M10019	chr4:17631019-17631519	ascl1a	0.108869	Inter	0.322535	olig2->chr4:17631019-17631519->ascl1a	Act	1.16665	0.683363	4.51391
sox2	M10067	chr4:17631019-17631519	ascl1a	0.445195	Inter	0.269711	sox2->chr4:17631019-17631519->ascl1a	Act	0.777717	0.683363	4.51391
esr2a	M05883_2.00	chr4:17631019-17631519	ascl1a	0.060689	Inter	0.333868	esr2a->chr4:17631019-17631519->ascl1a	Act	1.11001	0.683363	4.51391
zic2b	M08902_2.00	chr4:17631019-17631519	ascl1a	0.125147	Inter	0.429374	zic2b->chr4:17631019-17631519->ascl1a	Act	1.25359	0.683363	4.51391
crema	M00801	chr5:62356425-62356925	aspa	0.0858422	Body	0.0909308	crema->chr5:62356425-62356925->aspa	Act	0.510229	0.524407	3.17673
sox8a	M00203_2.00	chr5:62356425-62356925	aspa	0.294131	Body	0.164797	sox8a->chr5:62356425-62356925->aspa	Act	1.14831	0.524407	3.17673
sox2	M00203_2.00	chr5:62356425-62356925	aspa	0.312264	Body	0.041405	sox2->chr5:62356425-62356925->aspa	Act	0.777717	0.524407	3.17673
sox2	M03486_2.00	chr5:62469575-62470075	aspa	0.0669492	Inter	0.041405	sox2->chr5:62469575-62470075->aspa	Act	0.777717	0.524407	1.37494
sox8a	M05893_2.00	chr5:62469575-62470075	aspa	0.336224	Inter	0.164797	sox8a->chr5:62469575-62470075->aspa	Act	1.14831	0.524407	1.37494
nfixa	M02050	chr23:27455537-27456037	atf7a	0.288932	Body	0.105119	nfixa->chr23:27455537-27456037->atf7a	Act	2.03913	0.519992	0
nfic	M09635_2.00	chr23:27455537-27456037	atf7a	0.305547	Body	0.126936	nfic->chr23:27455537-27456037->atf7a	Act	2.75632	0.519992	0
nfixa	M02050	chr23:27464184-27464684	atf7a	0.288932	Body	0.105119	nfixa->chr23:27464184-27464684->atf7a	Act	2.03913	0.519992	4.92307
nfixa	M00806	chr23:27301654-27302154	atf7a	0.195804	Inter	0.105119	nfixa->chr23:27301654-27302154->atf7a	Act	2.03913	0.519992	4.79601
nfic	M03475_2.00	chr23:27301654-27302154	atf7a	0.409764	Inter	0.126936	nfic->chr23:27301654-27302154->atf7a	Act	2.75632	0.519992	4.79601
tcf7l1a	M00805	chr23:27491708-27492208	atf7a	0.191918	Inter	0.0729587	tcf7l1a->chr23:27491708-27492208->atf7a	Act	0.749125	0.519992	3.58899
nfixa	M02050	chr23:27491708-27492208	atf7a	0.288932	Inter	0.105119	nfixa->chr23:27491708-27492208->atf7a	Act	2.03913	0.519992	3.58899
tcf7l1a	M00805	chr23:27478968-27479468	atf7a	0.191918	TSS	0.0729587	tcf7l1a->chr23:27478968-27479468->atf7a	Act	0.749125	0.519992	4.7001
fosl2	M07092	chr23:27478968-27479468	atf7a	0.54754	TSS	0.11068	fosl2->chr23:27478968-27479468->atf7a	Act	2.31203	0.519992	4.7001
runx1	M09653	chr23:27478968-27479468	atf7a	0.239471	TSS	0.104899	runx1->chr23:27478968-27479468->atf7a	Act	1.51009	0.519992	4.7001
zic2b	M02940	chr13:8304272-8304772	atl2	0.166024	Body	0.140519	zic2b->chr13:8304272-8304772->atl2	Act	1.25359	0.476821	1.48474
ascl1a	M08744_2.00	chr13:8172632-8173132	atl2	0.0621193	Inter	0.128806	ascl1a->chr13:8172632-8173132->atl2	Act	0.683363	0.476821	3.06646
e2f3	M07938_2.00	chr13:8411142-8411642	atl2	0.0784527	Inter	0.106966	e2f3->chr13:8411142-8411642->atl2	Act	0.665166	0.476821	5.06832
tcf7l1a	M00805	chr13:8303523-8304023	atl2	0.191918	TSS	0.137464	tcf7l1a->chr13:8303523-8304023->atl2	Act	0.749125	0.476821	1.73949
myb	M02779	chr13:8303523-8304023	atl2	0.102114	TSS	0.127525	myb->chr13:8303523-8304023->atl2	Act	1.14685	0.476821	1.73949
mybl1	M02780	chr13:8303523-8304023	atl2	0.161062	TSS	0.171384	mybl1->chr13:8303523-8304023->atl2	Act	1.69618	0.476821	1.73949
tcf7l1b	M00200_2.00	chr13:8303523-8304023	atl2	0.0530075	TSS	0.127665	tcf7l1b->chr13:8303523-8304023->atl2	Act	0.336061	0.476821	1.73949
e2f3	M07938_2.00	chr13:8303523-8304023	atl2	0.0784527	TSS	0.106966	e2f3->chr13:8303523-8304023->atl2	Act	0.665166	0.476821	1.73949
ascl1a	M08744_2.00	chr13:8303523-8304023	atl2	0.0621193	TSS	0.128806	ascl1a->chr13:8303523-8304023->atl2	Act	0.683363	0.476821	1.73949
tead1a	M03995_2.00	chr14:30774595-30775095	atl3	0.397303	Body	0.0831091	tead1a->chr14:30774595-30775095->atl3	Act	1.61908	0.352413	0
sox2	M11331_2.00	chr14:30774595-30775095	atl3	0.425179	Body	0.0759478	sox2->chr14:30774595-30775095->atl3	Act	0.777717	0.352413	0
sox13	M11331_2.00	chr14:30774595-30775095	atl3	0.562935	Body	0.0791516	sox13->chr14:30774595-30775095->atl3	Act	1.40426	0.352413	0
junbb	M00924	chr14:30751186-30751686	atl3	0.332304	Inter	0.0614606	junbb->chr14:30751186-30751686->atl3	Act	0.837658	0.352413	4.71998
fosl2	M00924	chr14:30751186-30751686	atl3	0.534263	Inter	0.0789272	fosl2->chr14:30751186-30751686->atl3	Act	2.31203	0.352413	4.71998
tead1a	M04141	chr14:30751186-30751686	atl3	0.373323	Inter	0.0831091	tead1a->chr14:30751186-30751686->atl3	Act	1.61908	0.352413	4.71998
sox2	M05759_2.00	chr14:30751186-30751686	atl3	0.340395	Inter	0.0759478	sox2->chr14:30751186-30751686->atl3	Act	0.777717	0.352413	4.71998
sox13	M05759_2.00	chr14:30751186-30751686	atl3	0.467712	Inter	0.0791516	sox13->chr14:30751186-30751686->atl3	Act	1.40426	0.352413	4.71998
sox2	M03487_2.00	chr14:30775137-30775637	atl3	0.109219	TSS	0.0759478	sox2->chr14:30775137-30775637->atl3	Act	0.777717	0.352413	0
sox13	M03487_2.00	chr14:30775137-30775637	atl3	0.137222	TSS	0.0791516	sox13->chr14:30775137-30775637->atl3	Act	1.40426	0.352413	0
e2f3	M02089	chr15:6859035-6859535	atm	0.0769846	Inter	0.12006	e2f3->chr15:6859035-6859535->atm	Act	0.665166	0.599435	2.19458
sox2	M03542_2.00	chr15:6859035-6859535	atm	0.156788	Inter	0.124218	sox2->chr15:6859035-6859535->atm	Act	0.777717	0.599435	2.19458
gli2a	M05331	chr14:9522110-9522610	atoh8	0.0593127	Body	0.205468	gli2a->chr14:9522110-9522610->atoh8	Act	2.41799	0.523565	1.96022
gli2a	M02641_2.00	chr14:9544279-9544779	atoh8	0.0629451	Inter	0.205468	gli2a->chr14:9544279-9544779->atoh8	Act	2.41799	0.523565	5.73422
sox2	M05752_2.00	chr14:9544279-9544779	atoh8	0.417629	Inter	0.076485	sox2->chr14:9544279-9544779->atoh8	Act	0.777717	0.523565	5.73422
sox8a	M05752_2.00	chr14:9544279-9544779	atoh8	0.496256	Inter	0.184335	sox8a->chr14:9544279-9544779->atoh8	Act	1.14831	0.523565	5.73422
tcf7l1a	M08901	chr6:38626393-38626893	atp10a	0.0660347	Body	0.276759	tcf7l1a->chr6:38626393-38626893->atp10a	Act	0.749125	0.99687	0
fosl2	M04272_2.00	chr6:38626393-38626893	atp10a	0.223066	Body	0.342428	fosl2->chr6:38626393-38626893->atp10a	Act	2.31203	0.99687	0
sox8a	M08168_2.00	chr6:38626393-38626893	atp10a	0.422586	Body	0.315206	sox8a->chr6:38626393-38626893->atp10a	Act	1.14831	0.99687	0
sox2	M08168_2.00	chr6:38626393-38626893	atp10a	0.444115	Body	0.314957	sox2->chr6:38626393-38626893->atp10a	Act	0.777717	0.99687	0
sox13	M08168_2.00	chr6:38626393-38626893	atp10a	0.574225	Body	0.39025	sox13->chr6:38626393-38626893->atp10a	Act	1.40426	0.99687	0
tcf7l1b	M08428_2.00	chr6:38626393-38626893	atp10a	0.167748	Body	0.328898	tcf7l1b->chr6:38626393-38626893->atp10a	Act	0.336061	0.99687	0
tcf7l1a	M01594	chr6:38853452-38853952	atp10a	0.328895	Inter	0.276759	tcf7l1a->chr6:38853452-38853952->atp10a	Act	0.749125	0.99687	2.0224
sox2	M02246	chr6:38853452-38853952	atp10a	0.217687	Inter	0.314957	sox2->chr6:38853452-38853952->atp10a	Act	0.777717	0.99687	2.0224
sox13	M09787	chr6:38853452-38853952	atp10a	0.552681	Inter	0.39025	sox13->chr6:38853452-38853952->atp10a	Act	1.40426	0.99687	2.0224
sox8a	M00205_2.00	chr6:38853452-38853952	atp10a	0.269599	Inter	0.315206	sox8a->chr6:38853452-38853952->atp10a	Act	1.14831	0.99687	2.0224
tcf7l1b	M09392_2.00	chr6:38853452-38853952	atp10a	0.40907	Inter	0.328898	tcf7l1b->chr6:38853452-38853952->atp10a	Act	0.336061	0.99687	2.0224
fosl2	M03870	chr6:38854867-38855367	atp10a	0.542626	Inter	0.342428	fosl2->chr6:38854867-38855367->atp10a	Act	2.31203	0.99687	1.22436
myb	M00179_2.00	chr6:38854867-38855367	atp10a	0.14176	Inter	0.21749	myb->chr6:38854867-38855367->atp10a	Act	1.14685	0.99687	1.22436
mybl1	M00179_2.00	chr6:38854867-38855367	atp10a	0.199222	Inter	0.317596	mybl1->chr6:38854867-38855367->atp10a	Act	1.69618	0.99687	1.22436
tcf7l1a	M05757_2.00	chr6:38854867-38855367	atp10a	0.0618552	Inter	0.276759	tcf7l1a->chr6:38854867-38855367->atp10a	Act	0.749125	0.99687	1.22436
tcf7l1b	M05757_2.00	chr6:38854867-38855367	atp10a	0.100263	Inter	0.328898	tcf7l1b->chr6:38854867-38855367->atp10a	Act	0.336061	0.99687	1.22436
sox8a	M05765_2.00	chr6:38854867-38855367	atp10a	0.406229	Inter	0.315206	sox8a->chr6:38854867-38855367->atp10a	Act	1.14831	0.99687	1.22436
sox2	M05765_2.00	chr6:38854867-38855367	atp10a	0.42428	Inter	0.314957	sox2->chr6:38854867-38855367->atp10a	Act	0.777717	0.99687	1.22436
sox13	M05765_2.00	chr6:38854867-38855367	atp10a	0.546137	Inter	0.39025	sox13->chr6:38854867-38855367->atp10a	Act	1.40426	0.99687	1.22436
sox8a	M00070_2.00	chr6:38627024-38627524	atp10a	0.197053	TSS	0.315206	sox8a->chr6:38627024-38627524->atp10a	Act	1.14831	0.99687	0
sox2	M00070_2.00	chr6:38627024-38627524	atp10a	0.209096	TSS	0.314957	sox2->chr6:38627024-38627524->atp10a	Act	0.777717	0.99687	0
sox13	M00070_2.00	chr6:38627024-38627524	atp10a	0.268754	TSS	0.39025	sox13->chr6:38627024-38627524->atp10a	Act	1.40426	0.99687	0
myb	M00179_2.00	chr6:38627024-38627524	atp10a	0.14176	TSS	0.21749	myb->chr6:38627024-38627524->atp10a	Act	1.14685	0.99687	0
mybl1	M00179_2.00	chr6:38627024-38627524	atp10a	0.199222	TSS	0.317596	mybl1->chr6:38627024-38627524->atp10a	Act	1.69618	0.99687	0
tcf7l1a	M08167_2.00	chr6:38627024-38627524	atp10a	0.0700878	TSS	0.276759	tcf7l1a->chr6:38627024-38627524->atp10a	Act	0.749125	0.99687	0
tcf7l1b	M08167_2.00	chr6:38627024-38627524	atp10a	0.109555	TSS	0.328898	tcf7l1b->chr6:38627024-38627524->atp10a	Act	0.336061	0.99687	0
myb	M09813	chr22:37021097-37021597	ATP11B	0.0902249	Inter	0.0737633	myb->chr22:37021097-37021597->ATP11B	Act	1.14685	0.474106	4.65168
fosl2	M10237	chr22:37021097-37021597	ATP11B	0.549716	Inter	0.0846563	fosl2->chr22:37021097-37021597->ATP11B	Act	2.31203	0.474106	4.65168
mybl1	M08150_2.00	chr22:37021097-37021597	ATP11B	0.130889	Inter	0.0863872	mybl1->chr22:37021097-37021597->ATP11B	Act	1.69618	0.474106	4.65168
stat3	M00777	chr22:37130364-37130864	ATP11B	0.207571	Inter	0.0756584	stat3->chr22:37130364-37130864->ATP11B	Act	1.70202	0.474106	0
tcf7l1a	M00805	chr22:37130364-37130864	ATP11B	0.191918	Inter	0.0995275	tcf7l1a->chr22:37130364-37130864->ATP11B	Act	0.749125	0.474106	0
klf8	M05318	chr22:37130364-37130864	ATP11B	0.0951954	Inter	0.0355994	klf8->chr22:37130364-37130864->ATP11B	Act	0.378342	0.474106	0
gli2a	M02641_2.00	chr22:37130364-37130864	ATP11B	0.0629451	Inter	0.101306	gli2a->chr22:37130364-37130864->ATP11B	Act	2.41799	0.474106	0
tcf7l1b	M08167_2.00	chr22:37130364-37130864	ATP11B	0.109555	Inter	0.0808274	tcf7l1b->chr22:37130364-37130864->ATP11B	Act	0.336061	0.474106	0
myb	M09601_2.00	chr22:37130364-37130864	ATP11B	0.216188	Inter	0.0737633	myb->chr22:37130364-37130864->ATP11B	Act	1.14685	0.474106	0
mybl1	M09601_2.00	chr22:37130364-37130864	ATP11B	0.322532	Inter	0.0863872	mybl1->chr22:37130364-37130864->ATP11B	Act	1.69618	0.474106	0
fosl2	M08924	chr22:37135522-37136022	ATP11B	0.229156	Inter	0.0846563	fosl2->chr22:37135522-37136022->ATP11B	Act	2.31203	0.474106	0
fosl2	M00924	chr22:37140070-37140570	ATP11B	0.534263	Inter	0.0846563	fosl2->chr22:37140070-37140570->ATP11B	Act	2.31203	0.474106	2.57704
fosl2	M07092	chr22:37142049-37142549	ATP11B	0.54754	Inter	0.0846563	fosl2->chr22:37142049-37142549->ATP11B	Act	2.31203	0.474106	0
fosl2	M03870	chr22:37193365-37193865	ATP11B	0.542626	Inter	0.0846563	fosl2->chr22:37193365-37193865->ATP11B	Act	2.31203	0.474106	4.60911
gli2a	M05331	chr22:37193365-37193865	ATP11B	0.0593127	Inter	0.101306	gli2a->chr22:37193365-37193865->ATP11B	Act	2.41799	0.474106	4.60911
foxj3	M04830_2.00	chr22:37193365-37193865	ATP11B	0.0521034	Inter	0.0595497	foxj3->chr22:37193365-37193865->ATP11B	Act	0.808686	0.474106	4.60911
tcf7l1a	M00805	chr9:35901268-35901768	atp1a1b	0.191918	Body	0.0582717	tcf7l1a->chr9:35901268-35901768->atp1a1b	Act	0.749125	0.896345	1.54825
mybl1	M05608	chr9:35901268-35901768	atp1a1b	0.0584619	Body	0.0671013	mybl1->chr9:35901268-35901768->atp1a1b	Act	1.69618	0.896345	1.54825
sox8a	M05791_2.00	chr9:35901268-35901768	atp1a1b	0.417525	Body	0.548246	sox8a->chr9:35901268-35901768->atp1a1b	Act	1.14831	0.896345	1.54825
sox13	M05791_2.00	chr9:35901268-35901768	atp1a1b	0.531603	Body	0.541036	sox13->chr9:35901268-35901768->atp1a1b	Act	1.40426	0.896345	1.54825
nfixa	M00806	chr9:35902773-35903273	atp1a1b	0.195804	Body	0.32791	nfixa->chr9:35902773-35903273->atp1a1b	Act	2.03913	0.896345	0
mybl1	M08890	chr9:35885770-35886270	atp1a1b	0.112543	Inter	0.0671013	mybl1->chr9:35885770-35886270->atp1a1b	Act	1.69618	0.896345	0
nfixa	M02050	chr9:35890051-35890551	atp1a1b	0.288932	Inter	0.32791	nfixa->chr9:35890051-35890551->atp1a1b	Act	2.03913	0.896345	5.38825
sox8a	M09389_2.00	chr9:35890051-35890551	atp1a1b	0.504662	Inter	0.548246	sox8a->chr9:35890051-35890551->atp1a1b	Act	1.14831	0.896345	5.38825
sox13	M09389_2.00	chr9:35890051-35890551	atp1a1b	0.609713	Inter	0.541036	sox13->chr9:35890051-35890551->atp1a1b	Act	1.40426	0.896345	5.38825
nfixa	M02050	chr9:35922224-35922724	atp1a1b	0.288932	Inter	0.32791	nfixa->chr9:35922224-35922724->atp1a1b	Act	2.03913	0.896345	4.60502
sox8a	M04546	chr9:35922224-35922724	atp1a1b	0.229255	Inter	0.548246	sox8a->chr9:35922224-35922724->atp1a1b	Act	1.14831	0.896345	4.60502
sox13	M03488_2.00	chr9:35922224-35922724	atp1a1b	0.240095	Inter	0.541036	sox13->chr9:35922224-35922724->atp1a1b	Act	1.40426	0.896345	4.60502
nfixa	M00193	chr9:35922879-35923379	atp1a1b	0.247962	Inter	0.32791	nfixa->chr9:35922879-35923379->atp1a1b	Act	2.03913	0.896345	3.43299
hlfa	M00260	chr9:35922879-35923379	atp1a1b	0.245076	Inter	0.367492	hlfa->chr9:35922879-35923379->atp1a1b	Act	0.589804	0.896345	3.43299
sox8a	M02912	chr9:35922879-35923379	atp1a1b	0.0695312	Inter	0.548246	sox8a->chr9:35922879-35923379->atp1a1b	Act	1.14831	0.896345	3.43299
sox13	M00213_2.00	chr9:35922879-35923379	atp1a1b	0.486407	Inter	0.541036	sox13->chr9:35922879-35923379->atp1a1b	Act	1.40426	0.896345	3.43299
sox8a	M05761_2.00	chr9:35925181-35925681	atp1a1b	0.504096	Inter	0.548246	sox8a->chr9:35925181-35925681->atp1a1b	Act	1.14831	0.896345	2.68104
sox13	M05761_2.00	chr9:35925181-35925681	atp1a1b	0.596292	Inter	0.541036	sox13->chr9:35925181-35925681->atp1a1b	Act	1.40426	0.896345	2.68104
tcf7l1a	M09638_2.00	chr9:35925181-35925681	atp1a1b	0.0825851	Inter	0.0582717	tcf7l1a->chr9:35925181-35925681->atp1a1b	Act	0.749125	0.896345	2.68104
rfx2	M09002	chr6:29217117-29217617	atp1b1a	0.355798	Body	0.307772	rfx2->chr6:29217117-29217617->atp1b1a	Act	1.13253	0.403025	1.07218
sox2	M03484_2.00	chr6:29217117-29217617	atp1b1a	0.11663	Body	0.331961	sox2->chr6:29217117-29217617->atp1b1a	Act	0.777717	0.403025	1.07218
sox13	M03484_2.00	chr6:29217117-29217617	atp1b1a	0.141082	Body	0.330018	sox13->chr6:29217117-29217617->atp1b1a	Act	1.40426	0.403025	1.07218
erf	M09055_2.00	chr6:29217117-29217617	atp1b1a	0.288082	Body	0.250973	erf->chr6:29217117-29217617->atp1b1a	Act	0.721766	0.403025	1.07218
erfl3	M09055_2.00	chr6:29217117-29217617	atp1b1a	0.35224	Body	0.292715	erfl3->chr6:29217117-29217617->atp1b1a	Act	1.01761	0.403025	1.07218
zic2b	M04566_2.00	chr6:29217632-29218132	atp1b1a	0.227969	Body	0.276888	zic2b->chr6:29217632-29218132->atp1b1a	Act	1.25359	0.403025	0
erf	M08111_2.00	chr6:29026072-29026572	atp1b1a	0.257322	Inter	0.250973	erf->chr6:29026072-29026572->atp1b1a	Act	0.721766	0.403025	3.85144
erfl3	M08111_2.00	chr6:29026072-29026572	atp1b1a	0.320573	Inter	0.292715	erfl3->chr6:29026072-29026572->atp1b1a	Act	1.01761	0.403025	3.85144
rfx2	M00186_2.00	chr6:29243594-29244094	atp1b1a	0.319417	Inter	0.307772	rfx2->chr6:29243594-29244094->atp1b1a	Act	1.13253	0.403025	0
erf	M04801_2.00	chr6:29243594-29244094	atp1b1a	0.135332	Inter	0.250973	erf->chr6:29243594-29244094->atp1b1a	Act	0.721766	0.403025	0
erfl3	M04801_2.00	chr6:29243594-29244094	atp1b1a	0.158837	Inter	0.292715	erfl3->chr6:29243594-29244094->atp1b1a	Act	1.01761	0.403025	0
stat3	M00777	chr6:29357844-29358344	atp1b1a	0.207571	Inter	0.256047	stat3->chr6:29357844-29358344->atp1b1a	Act	1.70202	0.403025	5.75395
sox2	M01014	chr6:29357844-29358344	atp1b1a	0.352046	Inter	0.331961	sox2->chr6:29357844-29358344->atp1b1a	Act	0.777717	0.403025	5.75395
sox13	M01014	chr6:29357844-29358344	atp1b1a	0.447704	Inter	0.330018	sox13->chr6:29357844-29358344->atp1b1a	Act	1.40426	0.403025	5.75395
erf	M08241	chr6:29357844-29358344	atp1b1a	0.141542	Inter	0.250973	erf->chr6:29357844-29358344->atp1b1a	Act	0.721766	0.403025	5.75395
tcf7l1b	M00712_2.00	chr6:29357844-29358344	atp1b1a	0.318582	Inter	0.190323	tcf7l1b->chr6:29357844-29358344->atp1b1a	Act	0.336061	0.403025	5.75395
tead1a	M09434_2.00	chr6:29357844-29358344	atp1b1a	0.358917	Inter	0.305767	tead1a->chr6:29357844-29358344->atp1b1a	Act	1.61908	0.403025	5.75395
rfx2	M09002	chr6:29216493-29216993	atp1b1a	0.355798	TSS	0.307772	rfx2->chr6:29216493-29216993->atp1b1a	Act	1.13253	0.403025	0
sox8a	M04547	chr14:33458461-33458961	atp1b4	0.145362	Body	0.404202	sox8a->chr14:33458461-33458961->atp1b4	Act	1.14831	0.957532	0
nfixa	M05741_2.00	chr14:33458461-33458961	atp1b4	0.282626	Body	0.183438	nfixa->chr14:33458461-33458961->atp1b4	Act	2.03913	0.957532	0
sox8a	M00205_2.00	chr14:33460312-33460812	atp1b4	0.269599	Body	0.404202	sox8a->chr14:33460312-33460812->atp1b4	Act	1.14831	0.957532	3.35722
tead1a	M03996_2.00	chr14:33460312-33460812	atp1b4	0.38626	Body	0.0349179	tead1a->chr14:33460312-33460812->atp1b4	Act	1.61908	0.957532	3.35722
nfixa	M02050	chr14:33461010-33461510	atp1b4	0.288932	Body	0.183438	nfixa->chr14:33461010-33461510->atp1b4	Act	2.03913	0.957532	3.66336
sox8a	M02912	chr14:33461010-33461510	atp1b4	0.0695312	Body	0.404202	sox8a->chr14:33461010-33461510->atp1b4	Act	1.14831	0.957532	3.66336
stat3	M07229	chr14:33461010-33461510	atp1b4	0.33244	Body	0.216934	stat3->chr14:33461010-33461510->atp1b4	Act	1.70202	0.957532	3.66336
tead1a	M03996_2.00	chr14:33461010-33461510	atp1b4	0.38626	Body	0.0349179	tead1a->chr14:33461010-33461510->atp1b4	Act	1.61908	0.957532	3.66336
nfixa	M04058	chr14:33656420-33656920	atp1b4	0.287683	Inter	0.183438	nfixa->chr14:33656420-33656920->atp1b4	Act	2.03913	0.957532	0
sox8a	M04547	chr14:33457730-33458230	atp1b4	0.145362	TSS	0.404202	sox8a->chr14:33457730-33458230->atp1b4	Act	1.14831	0.957532	0
olig2	M09703	chr8:11700833-11701333	atp2a2a	0.0616604	Body	0.132194	olig2->chr8:11700833-11701333->atp2a2a	Act	1.16665	0.706783	6.5278
ascl1a	M09767	chr8:11700833-11701333	atp2a2a	0.0649742	Body	0.167784	ascl1a->chr8:11700833-11701333->atp2a2a	Act	0.683363	0.706783	6.5278
sox8a	M05766_2.00	chr8:11700833-11701333	atp2a2a	0.392474	Body	0.125844	sox8a->chr8:11700833-11701333->atp2a2a	Act	1.14831	0.706783	6.5278
sox2	M05766_2.00	chr8:11700833-11701333	atp2a2a	0.40843	Body	0.128309	sox2->chr8:11700833-11701333->atp2a2a	Act	0.777717	0.706783	6.5278
sox13	M05766_2.00	chr8:11700833-11701333	atp2a2a	0.526426	Body	0.156062	sox13->chr8:11700833-11701333->atp2a2a	Act	1.40426	0.706783	6.5278
sox8a	M04546	chr8:11843657-11844157	atp2a2a	0.229255	Inter	0.125844	sox8a->chr8:11843657-11844157->atp2a2a	Act	1.14831	0.706783	0
olig2	M09703	chr8:11843657-11844157	atp2a2a	0.0616604	Inter	0.132194	olig2->chr8:11843657-11844157->atp2a2a	Act	1.16665	0.706783	0
zic2b	M00137_2.00	chr8:11843657-11844157	atp2a2a	0.187975	Inter	0.131287	zic2b->chr8:11843657-11844157->atp2a2a	Act	1.25359	0.706783	0
foxj1a	M01987_2.00	chr8:11843657-11844157	atp2a2a	0.147027	Inter	0.122534	foxj1a->chr8:11843657-11844157->atp2a2a	Act	0.670268	0.706783	0
sox2	M03485_2.00	chr8:11843657-11844157	atp2a2a	0.139909	Inter	0.128309	sox2->chr8:11843657-11844157->atp2a2a	Act	0.777717	0.706783	0
sox13	M03485_2.00	chr8:11843657-11844157	atp2a2a	0.19701	Inter	0.156062	sox13->chr8:11843657-11844157->atp2a2a	Act	1.40426	0.706783	0
erfl3	M08111_2.00	chr8:11843657-11844157	atp2a2a	0.320573	Inter	0.147472	erfl3->chr8:11843657-11844157->atp2a2a	Act	1.01761	0.706783	0
sox8a	M04546	chr8:11844160-11844660	atp2a2a	0.229255	Inter	0.125844	sox8a->chr8:11844160-11844660->atp2a2a	Act	1.14831	0.706783	0
olig2	M09703	chr8:11844160-11844660	atp2a2a	0.0616604	Inter	0.132194	olig2->chr8:11844160-11844660->atp2a2a	Act	1.16665	0.706783	0
sox2	M03485_2.00	chr8:11844160-11844660	atp2a2a	0.139909	Inter	0.128309	sox2->chr8:11844160-11844660->atp2a2a	Act	0.777717	0.706783	0
sox13	M03485_2.00	chr8:11844160-11844660	atp2a2a	0.19701	Inter	0.156062	sox13->chr8:11844160-11844660->atp2a2a	Act	1.40426	0.706783	0
erfl3	M08111_2.00	chr8:11844160-11844660	atp2a2a	0.320573	Inter	0.147472	erfl3->chr8:11844160-11844660->atp2a2a	Act	1.01761	0.706783	0
olig2	M09703	chr8:11686906-11687406	atp2a2a	0.0616604	TSS	0.132194	olig2->chr8:11686906-11687406->atp2a2a	Act	1.16665	0.706783	0
ascl1a	M09767	chr8:11686906-11687406	atp2a2a	0.0649742	TSS	0.167784	ascl1a->chr8:11686906-11687406->atp2a2a	Act	0.683363	0.706783	0
mybl1	M10297	chr8:11686906-11687406	atp2a2a	0.315136	TSS	0.1598	mybl1->chr8:11686906-11687406->atp2a2a	Act	1.69618	0.706783	0
sox8a	M06449_2.00	chr8:11686906-11687406	atp2a2a	0.428475	TSS	0.125844	sox8a->chr8:11686906-11687406->atp2a2a	Act	1.14831	0.706783	0
sox2	M06449_2.00	chr8:11686906-11687406	atp2a2a	0.431873	TSS	0.128309	sox2->chr8:11686906-11687406->atp2a2a	Act	0.777717	0.706783	0
sox13	M06449_2.00	chr8:11686906-11687406	atp2a2a	0.560277	TSS	0.156062	sox13->chr8:11686906-11687406->atp2a2a	Act	1.40426	0.706783	0
mybl1	M02780	chr8:11687568-11688068	atp2a2a	0.161062	TSS	0.1598	mybl1->chr8:11687568-11688068->atp2a2a	Act	1.69618	0.706783	0
fosl2	M08915	chr8:11687568-11688068	atp2a2a	0.207604	TSS	0.157687	fosl2->chr8:11687568-11688068->atp2a2a	Act	2.31203	0.706783	0
sox8a	M00197_2.00	chr8:11687568-11688068	atp2a2a	0.294131	TSS	0.125844	sox8a->chr8:11687568-11688068->atp2a2a	Act	1.14831	0.706783	0
sox2	M00197_2.00	chr8:11687568-11688068	atp2a2a	0.312264	TSS	0.128309	sox2->chr8:11687568-11688068->atp2a2a	Act	0.777717	0.706783	0
sox13	M00197_2.00	chr8:11687568-11688068	atp2a2a	0.391172	TSS	0.156062	sox13->chr8:11687568-11688068->atp2a2a	Act	1.40426	0.706783	0
ascl1a	M02814_2.00	chr21:16868912-16869412	atp2a2b	0.0744385	Inter	0.235088	ascl1a->chr21:16868912-16869412->atp2a2b	Act	0.683363	0.70325	4.37231
zic2b	M02894_2.00	chr21:16868912-16869412	atp2a2b	0.175498	Inter	0.243824	zic2b->chr21:16868912-16869412->atp2a2b	Act	1.25359	0.70325	4.37231
foxj3	M03061_2.00	chr21:16868912-16869412	atp2a2b	0.0513765	Inter	0.128435	foxj3->chr21:16868912-16869412->atp2a2b	Act	0.808686	0.70325	4.37231
tead1a	M05825_2.00	chr21:16868912-16869412	atp2a2b	0.390565	Inter	0.236442	tead1a->chr21:16868912-16869412->atp2a2b	Act	1.61908	0.70325	4.37231
fosl2	M08795_2.00	chr21:16868912-16869412	atp2a2b	0.551934	Inter	0.274606	fosl2->chr21:16868912-16869412->atp2a2b	Act	2.31203	0.70325	4.37231
tcf7l1a	M00805	chr21:16922116-16922616	atp2a2b	0.191918	Inter	0.218968	tcf7l1a->chr21:16922116-16922616->atp2a2b	Act	0.749125	0.70325	3.19844
rfx2	M04096	chr21:16922116-16922616	atp2a2b	0.209823	Inter	0.195386	rfx2->chr21:16922116-16922616->atp2a2b	Act	1.13253	0.70325	3.19844
foxn4	M04645	chr21:16922116-16922616	atp2a2b	0.110591	Inter	0.219852	foxn4->chr21:16922116-16922616->atp2a2b	Act	1.98217	0.70325	3.19844
erfl3	M09061_2.00	chr21:16922116-16922616	atp2a2b	0.224653	Inter	0.1869	erfl3->chr21:16922116-16922616->atp2a2b	Act	1.01761	0.70325	3.19844
esr2a	M09291_2.00	chr21:16922116-16922616	atp2a2b	0.0889213	Inter	0.203196	esr2a->chr21:16922116-16922616->atp2a2b	Act	1.11001	0.70325	3.19844
fosl2	M00924	chr21:16926536-16927036	atp2a2b	0.534263	Inter	0.274606	fosl2->chr21:16926536-16927036->atp2a2b	Act	2.31203	0.70325	5.93392
e2f3	M07083	chr21:16926536-16927036	atp2a2b	0.161533	Inter	0.20581	e2f3->chr21:16926536-16927036->atp2a2b	Act	0.665166	0.70325	5.93392
zic2b	M00151_2.00	chr21:16926536-16927036	atp2a2b	0.191352	Inter	0.243824	zic2b->chr21:16926536-16927036->atp2a2b	Act	1.25359	0.70325	5.93392
erfl3	M00157_2.00	chr21:16926536-16927036	atp2a2b	0.0643942	Inter	0.1869	erfl3->chr21:16926536-16927036->atp2a2b	Act	1.01761	0.70325	5.93392
runx1	M09631_2.00	chr21:16926536-16927036	atp2a2b	0.200077	Inter	0.23375	runx1->chr21:16926536-16927036->atp2a2b	Act	1.51009	0.70325	5.93392
myb	M11069_2.00	chr21:16926536-16927036	atp2a2b	0.137648	Inter	0.224756	myb->chr21:16926536-16927036->atp2a2b	Act	1.14685	0.70325	5.93392
tead1a	M03995_2.00	chr21:17050755-17051255	atp2a2b	0.397303	TSS	0.236442	tead1a->chr21:17050755-17051255->atp2a2b	Act	1.61908	0.70325	0
stat3	M08015_2.00	chr21:17050755-17051255	atp2a2b	0.179851	TSS	0.129598	stat3->chr21:17050755-17051255->atp2a2b	Act	1.70202	0.70325	0
rfx2	M09365_2.00	chr21:17050755-17051255	atp2a2b	0.293158	TSS	0.195386	rfx2->chr21:17050755-17051255->atp2a2b	Act	1.13253	0.70325	0
runx1	M00984	chr21:17051543-17052043	atp2a2b	0.181108	TSS	0.23375	runx1->chr21:17051543-17052043->atp2a2b	Act	1.51009	0.70325	0
zic2b	M07292	chr21:17051543-17052043	atp2a2b	0.187455	TSS	0.243824	zic2b->chr21:17051543-17052043->atp2a2b	Act	1.25359	0.70325	0
fosl2	M08915	chr21:17051543-17052043	atp2a2b	0.207604	TSS	0.274606	fosl2->chr21:17051543-17052043->atp2a2b	Act	2.31203	0.70325	0
stat3	M08017_2.00	chr21:17051543-17052043	atp2a2b	0.306831	TSS	0.129598	stat3->chr21:17051543-17052043->atp2a2b	Act	1.70202	0.70325	0
erfl3	M09052_2.00	chr21:17051543-17052043	atp2a2b	0.231018	TSS	0.1869	erfl3->chr21:17051543-17052043->atp2a2b	Act	1.01761	0.70325	0
foxj3	M09094_2.00	chr21:17051543-17052043	atp2a2b	0.0542933	TSS	0.128435	foxj3->chr21:17051543-17052043->atp2a2b	Act	0.808686	0.70325	0
stat3	M09714	chr5:31167622-31168122	atp2a3	0.305177	Body	0.178967	stat3->chr5:31167622-31168122->atp2a3	Act	1.70202	0.669632	0
hlfa	M00260	chr5:31180804-31181304	atp2a3	0.245076	Body	0.203953	hlfa->chr5:31180804-31181304->atp2a3	Act	0.589804	0.669632	0
crema	M07985	chr5:31180804-31181304	atp2a3	0.0840284	Body	0.124482	crema->chr5:31180804-31181304->atp2a3	Act	0.510229	0.669632	0
sox8a	M03508_2.00	chr5:31180804-31181304	atp2a3	0.25075	Body	0.273176	sox8a->chr5:31180804-31181304->atp2a3	Act	1.14831	0.669632	0
crema	M04230_2.00	chr5:31200120-31200620	atp2a3	0.071202	Body	0.124482	crema->chr5:31200120-31200620->atp2a3	Act	0.510229	0.669632	4.00926
sox8a	M06559_2.00	chr5:31200120-31200620	atp2a3	0.389744	Body	0.273176	sox8a->chr5:31200120-31200620->atp2a3	Act	1.14831	0.669632	4.00926
hlfa	M04212	chr5:31217328-31217828	atp2a3	0.283017	Body	0.203953	hlfa->chr5:31217328-31217828->atp2a3	Act	0.589804	0.669632	4.05188
crema	M07985	chr5:31217328-31217828	atp2a3	0.0840284	Body	0.124482	crema->chr5:31217328-31217828->atp2a3	Act	0.510229	0.669632	4.05188
nr1i2	M01153	chr5:31241505-31242005	atp2a3	0.14047	Body	0.17781	nr1i2->chr5:31241505-31242005->atp2a3	Act	0.312797	0.669632	5.42157
crema	M00124_2.00	chr5:31241505-31242005	atp2a3	0.100383	Body	0.124482	crema->chr5:31241505-31242005->atp2a3	Act	0.510229	0.669632	5.42157
nfic	M03479_2.00	chr5:31241505-31242005	atp2a3	0.406484	Body	0.125835	nfic->chr5:31241505-31242005->atp2a3	Act	2.75632	0.669632	5.42157
fosl2	M00925	chr14:22376145-22376645	atp7a	0.522926	Inter	0.0603886	fosl2->chr14:22376145-22376645->atp7a	Act	2.31203	0.318276	4.30193
foxp1a	M09933	chr14:22376145-22376645	atp7a	0.0522594	Inter	0.0348229	foxp1a->chr14:22376145-22376645->atp7a	Act	0.748865	0.318276	4.30193
tcf7l1a	M00805	chr14:22397076-22397576	atp7a	0.191918	TSS	0.0586639	tcf7l1a->chr14:22397076-22397576->atp7a	Act	0.749125	0.318276	0
fosl2	M03870	chr14:22397076-22397576	atp7a	0.542626	TSS	0.0603886	fosl2->chr14:22397076-22397576->atp7a	Act	2.31203	0.318276	0
nfic	M09381_2.00	chr14:22397076-22397576	atp7a	0.380148	TSS	0.0372086	nfic->chr14:22397076-22397576->atp7a	Act	2.75632	0.318276	0
tcf7l1a	M00805	chr14:22397714-22398214	atp7a	0.191918	TSS	0.0586639	tcf7l1a->chr14:22397714-22398214->atp7a	Act	0.749125	0.318276	0
fosl2	M03870	chr14:22397714-22398214	atp7a	0.542626	TSS	0.0603886	fosl2->chr14:22397714-22398214->atp7a	Act	2.31203	0.318276	0
zic2b	M02940	chr2:16369673-16370173	atr	0.166024	Inter	0.109767	zic2b->chr2:16369673-16370173->atr	Act	1.25359	0.35755	3.78966
erfl3	M04721_2.00	chr2:16369673-16370173	atr	0.17409	Inter	0.117751	erfl3->chr2:16369673-16370173->atr	Act	1.01761	0.35755	3.78966
tead1a	M04142	chr2:16449322-16449822	atr	0.149864	TSS	0.148392	tead1a->chr2:16449322-16449822->atr	Act	1.61908	0.35755	0
nfic	M09815	chr2:16449322-16449822	atr	0.368835	TSS	0.109992	nfic->chr2:16449322-16449822->atr	Act	2.75632	0.35755	0
sox8a	M00201_2.00	chr2:16449322-16449822	atr	0.19628	TSS	0.116694	sox8a->chr2:16449322-16449822->atr	Act	1.14831	0.35755	0
erfl3	M01492_2.00	chr2:16449322-16449822	atr	0.110961	TSS	0.117751	erfl3->chr2:16449322-16449822->atr	Act	1.01761	0.35755	0
myb	M00004	chr14:10656746-10657246	atrx	0.202864	Body	0.200319	myb->chr14:10656746-10657246->atrx	Act	1.14685	0.340929	0
mybl1	M08150_2.00	chr14:10656746-10657246	atrx	0.130889	Body	0.268054	mybl1->chr14:10656746-10657246->atrx	Act	1.69618	0.340929	0
stat3	M01595	chr5:41707548-41708048	atxn2	0.36922	Body	0.131315	stat3->chr5:41707548-41708048->atxn2	Act	1.70202	0.793617	0
rarga	M02706_2.00	chr5:41707548-41708048	atxn2	0.255194	Body	0.117695	rarga->chr5:41707548-41708048->atxn2	Act	0.588239	0.793617	0
sox13	M03498_2.00	chr5:41709024-41709524	atxn2	0.214437	Body	0.13793	sox13->chr5:41709024-41709524->atxn2	Act	1.40426	0.793617	1.7453
rarga	M09265_2.00	chr5:41709024-41709524	atxn2	0.229504	Body	0.117695	rarga->chr5:41709024-41709524->atxn2	Act	0.588239	0.793617	1.7453
rarga	M09294_2.00	chr5:41927542-41928042	atxn2	0.243923	Inter	0.117695	rarga->chr5:41927542-41928042->atxn2	Act	0.588239	0.793617	2.53376
rarga	M09317_2.00	chr5:41939331-41939831	atxn2	0.0807925	Inter	0.117695	rarga->chr5:41939331-41939831->atxn2	Act	0.588239	0.793617	0
stat3	M07065	chr5:41945158-41945658	atxn2	0.335993	Inter	0.131315	stat3->chr5:41945158-41945658->atxn2	Act	1.70202	0.793617	3.10645
foxj3	M08292	chr5:41945158-41945658	atxn2	0.0762468	Inter	0.0885058	foxj3->chr5:41945158-41945658->atxn2	Act	0.808686	0.793617	3.10645
rarga	M03354_2.00	chr5:41945158-41945658	atxn2	0.0562211	Inter	0.117695	rarga->chr5:41945158-41945658->atxn2	Act	0.588239	0.793617	3.10645
sox13	M11331_2.00	chr5:41945158-41945658	atxn2	0.562935	Inter	0.13793	sox13->chr5:41945158-41945658->atxn2	Act	1.40426	0.793617	3.10645
sox13	M03976_2.00	chr5:41708381-41708881	atxn2	0.421027	TSS	0.13793	sox13->chr5:41708381-41708881->atxn2	Act	1.40426	0.793617	1.03153
rarga	M09317_2.00	chr5:41708381-41708881	atxn2	0.0807925	TSS	0.117695	rarga->chr5:41708381-41708881->atxn2	Act	0.588239	0.793617	1.03153
fosl2	M00924	chr11:19408273-19408773	atxn7	0.534263	Inter	0.132282	fosl2->chr11:19408273-19408773->atxn7	Act	2.31203	0.708959	0
erfl3	M10494_2.00	chr11:19408273-19408773	atxn7	0.0904083	Inter	0.126735	erfl3->chr11:19408273-19408773->atxn7	Act	1.01761	0.708959	0
rfx2	M00975	chr11:19576783-19577283	atxn7	0.200446	TSS	0.11553	rfx2->chr11:19576783-19577283->atxn7	Act	1.13253	0.708959	0
fosl2	M08915	chr11:19576783-19577283	atxn7	0.207604	TSS	0.132282	fosl2->chr11:19576783-19577283->atxn7	Act	2.31203	0.708959	0
sox13	M03498_2.00	chr11:19576783-19577283	atxn7	0.214437	TSS	0.150424	sox13->chr11:19576783-19577283->atxn7	Act	1.40426	0.708959	0
erfl3	M08111_2.00	chr11:19576783-19577283	atxn7	0.320573	TSS	0.126735	erfl3->chr11:19576783-19577283->atxn7	Act	1.01761	0.708959	0
tcf7l1a	M00805	chr11:19598177-19598677	atxn7	0.191918	TSS	0.115964	tcf7l1a->chr11:19598177-19598677->atxn7	Act	0.749125	0.708959	1.13445
fosl2	M08915	chr11:19598177-19598677	atxn7	0.207604	TSS	0.132282	fosl2->chr11:19598177-19598677->atxn7	Act	2.31203	0.708959	1.13445
tcf7l1b	M10095	chr11:19598177-19598677	atxn7	0.107705	TSS	0.133813	tcf7l1b->chr11:19598177-19598677->atxn7	Act	0.336061	0.708959	1.13445
sox13	M03487_2.00	chr11:19598177-19598677	atxn7	0.137222	TSS	0.150424	sox13->chr11:19598177-19598677->atxn7	Act	1.40426	0.708959	1.13445
nfic	M05745_2.00	chr11:19598177-19598677	atxn7	0.390606	TSS	0.138633	nfic->chr11:19598177-19598677->atxn7	Act	2.75632	0.708959	1.13445
rarga	M09278_2.00	chr11:19598177-19598677	atxn7	0.129306	TSS	0.107881	rarga->chr11:19598177-19598677->atxn7	Act	0.588239	0.708959	1.13445
tcf7l1a	M00805	chr11:19598681-19599181	atxn7	0.191918	TSS	0.115964	tcf7l1a->chr11:19598681-19599181->atxn7	Act	0.749125	0.708959	0
rfx2	M10048	chr11:19598681-19599181	atxn7	0.358117	TSS	0.11553	rfx2->chr11:19598681-19599181->atxn7	Act	1.13253	0.708959	0
tcf7l1b	M10095	chr11:19598681-19599181	atxn7	0.107705	TSS	0.133813	tcf7l1b->chr11:19598681-19599181->atxn7	Act	0.336061	0.708959	0
sox13	M03496_2.00	chr11:19598681-19599181	atxn7	0.23128	TSS	0.150424	sox13->chr11:19598681-19599181->atxn7	Act	1.40426	0.708959	0
nfic	M09378_2.00	chr11:19598681-19599181	atxn7	0.427033	TSS	0.138633	nfic->chr11:19598681-19599181->atxn7	Act	2.75632	0.708959	0
rfx2	M04095	chr16:52580254-52580754	azin1a	0.358754	Inter	0.180835	rfx2->chr16:52580254-52580754->azin1a	Act	1.13253	0.314575	3.41663
foxp1a	M07095	chr16:52580254-52580754	azin1a	0.164511	Inter	0.113746	foxp1a->chr16:52580254-52580754->azin1a	Act	0.748865	0.314575	3.41663
stat3	M09714	chr16:52580254-52580754	azin1a	0.305177	Inter	0.142924	stat3->chr16:52580254-52580754->azin1a	Act	1.70202	0.314575	3.41663
gli3	M01704	chr16:52918215-52918715	azin1a	0.068013	Inter	0.215077	gli3->chr16:52918215-52918715->azin1a	Act	0.96568	0.314575	0
fosl2	M03870	chr16:52918215-52918715	azin1a	0.542626	Inter	0.17873	fosl2->chr16:52918215-52918715->azin1a	Act	2.31203	0.314575	0
gli2a	M02641_2.00	chr16:52918215-52918715	azin1a	0.0629451	Inter	0.24681	gli2a->chr16:52918215-52918715->azin1a	Act	2.41799	0.314575	0
sox2	M03971_2.00	chr16:52918215-52918715	azin1a	0.175627	Inter	0.176829	sox2->chr16:52918215-52918715->azin1a	Act	0.777717	0.314575	0
sox13	M03971_2.00	chr16:52918215-52918715	azin1a	0.210909	Inter	0.193342	sox13->chr16:52918215-52918715->azin1a	Act	1.40426	0.314575	0
fosl2	M08915	chr16:52732598-52733098	azin1a	0.207604	TSS	0.17873	fosl2->chr16:52732598-52733098->azin1a	Act	2.31203	0.314575	0
mybl1	M10297	chr16:52732598-52733098	azin1a	0.315136	TSS	0.145003	mybl1->chr16:52732598-52733098->azin1a	Act	1.69618	0.314575	0
sox2	M03517_2.00	chr16:52732598-52733098	azin1a	0.205521	TSS	0.176829	sox2->chr16:52732598-52733098->azin1a	Act	0.777717	0.314575	0
sox13	M03517_2.00	chr16:52732598-52733098	azin1a	0.279058	TSS	0.193342	sox13->chr16:52732598-52733098->azin1a	Act	1.40426	0.314575	0
foxp1a	M09101_2.00	chr16:52732598-52733098	azin1a	0.053837	TSS	0.113746	foxp1a->chr16:52732598-52733098->azin1a	Act	0.748865	0.314575	0
tead1a	M09653_2.00	chr16:52733771-52734271	azin1a	0.369457	TSS	0.195232	tead1a->chr16:52733771-52734271->azin1a	Act	1.61908	0.314575	0
sox13	M00710_2.00	chr4:12795283-12795783	b2m	0.304433	Body	0.222652	sox13->chr4:12795283-12795783->b2m	Act	1.40426	1.31094	5.04631
sox8a	M01014	chr8:50941937-50942437	b2ml	0.328759	Body	0.228388	sox8a->chr8:50941937-50942437->b2ml	Act	1.14831	1.18749	0
sox13	M01014	chr8:50941937-50942437	b2ml	0.447704	Body	0.260969	sox13->chr8:50941937-50942437->b2ml	Act	1.40426	1.18749	0
gli3	M01704	chr8:50941937-50942437	b2ml	0.068013	Body	0.264502	gli3->chr8:50941937-50942437->b2ml	Act	0.96568	1.18749	0
gli2a	M03902	chr8:50941937-50942437	b2ml	0.260418	Body	0.329717	gli2a->chr8:50941937-50942437->b2ml	Act	2.41799	1.18749	0
sox8a	M00205_2.00	chr8:50737889-50738389	b2ml	0.269599	Inter	0.228388	sox8a->chr8:50737889-50738389->b2ml	Act	1.14831	1.18749	7.85212
sox13	M00205_2.00	chr8:50737889-50738389	b2ml	0.377959	Inter	0.260969	sox13->chr8:50737889-50738389->b2ml	Act	1.40426	1.18749	7.85212
sox13	M03497_2.00	chr10:39164412-39164912	B3GAT1	0.187412	Body	0.14314	sox13->chr10:39164412-39164912->B3GAT1	Act	1.40426	0.557191	4.14441
rarga	M08223_2.00	chr10:39164412-39164912	B3GAT1	0.0580514	Body	0.126015	rarga->chr10:39164412-39164912->B3GAT1	Act	0.588239	0.557191	4.14441
sox13	M02719_2.00	chr10:38988839-38989339	B3GAT1	0.532837	Inter	0.14314	sox13->chr10:38988839-38989339->B3GAT1	Act	1.40426	0.557191	3.66257
rarga	M09276_2.00	chr10:38988839-38989339	B3GAT1	0.337735	Inter	0.126015	rarga->chr10:38988839-38989339->B3GAT1	Act	0.588239	0.557191	3.66257
sox13	M03543_2.00	chr10:39179364-39179864	B3GAT1	0.152183	Inter	0.14314	sox13->chr10:39179364-39179864->B3GAT1	Act	1.40426	0.557191	4.72153
sox8a	M00197_2.00	chr15:31713788-31714288	b3glcta	0.294131	Body	0.158116	sox8a->chr15:31713788-31714288->b3glcta	Act	1.14831	0.625721	3.71451
sox8a	M02488_2.00	chr15:31729892-31730392	b3glcta	0.236941	Body	0.158116	sox8a->chr15:31729892-31730392->b3glcta	Act	1.14831	0.625721	4.35978
sox8a	M00070_2.00	chr23:19756503-19757003	b4galt3	0.197053	Inter	0.133054	sox8a->chr23:19756503-19757003->b4galt3	Act	1.14831	0.726219	0
sox13	M00070_2.00	chr23:19756503-19757003	b4galt3	0.268754	Inter	0.132769	sox13->chr23:19756503-19757003->b4galt3	Act	1.40426	0.726219	0
sox8a	M00197_2.00	chr23:19812354-19812854	b4galt3	0.294131	Inter	0.133054	sox8a->chr23:19812354-19812854->b4galt3	Act	1.14831	0.726219	0
sox13	M00197_2.00	chr23:19812354-19812854	b4galt3	0.391172	Inter	0.132769	sox13->chr23:19812354-19812854->b4galt3	Act	1.40426	0.726219	0
rarga	M05606_2.00	chr23:20165318-20165818	b4galt3	0.0624392	Inter	0.114167	rarga->chr23:20165318-20165818->b4galt3	Act	0.588239	0.726219	0
rarga	M09265_2.00	chr23:20171509-20172009	b4galt3	0.229504	Inter	0.114167	rarga->chr23:20171509-20172009->b4galt3	Act	0.588239	0.726219	2.93469
sox8a	M03487_2.00	chr23:4039429-4039929	b4galt5	0.0815095	Body	0.183381	sox8a->chr23:4039429-4039929->b4galt5	Act	1.14831	0.544361	0
sox13	M03487_2.00	chr23:4039429-4039929	b4galt5	0.137222	Body	0.179756	sox13->chr23:4039429-4039929->b4galt5	Act	1.40426	0.544361	0
sox13	M09787	chr23:4052155-4052655	b4galt5	0.552681	Body	0.179756	sox13->chr23:4052155-4052655->b4galt5	Act	1.40426	0.544361	4.50843
sox8a	M00197_2.00	chr23:4052155-4052655	b4galt5	0.294131	Body	0.183381	sox8a->chr23:4052155-4052655->b4galt5	Act	1.14831	0.544361	4.50843
runx1	M01307_2.00	chr23:4052155-4052655	b4galt5	0.206452	Body	0.0810814	runx1->chr23:4052155-4052655->b4galt5	Act	1.51009	0.544361	4.50843
sox8a	M00205_2.00	chr23:4004490-4004990	b4galt5	0.269599	Inter	0.183381	sox8a->chr23:4004490-4004990->b4galt5	Act	1.14831	0.544361	4.20787
sox13	M00205_2.00	chr23:4004490-4004990	b4galt5	0.377959	Inter	0.179756	sox13->chr23:4004490-4004990->b4galt5	Act	1.40426	0.544361	4.20787
runx1	M05732_2.00	chr23:4004490-4004990	b4galt5	0.136382	Inter	0.0810814	runx1->chr23:4004490-4004990->b4galt5	Act	1.51009	0.544361	4.20787
tcf3b	M08062_2.00	chr17:40936666-40937166	babam2	0.132218	Inter	0.0615946	tcf3b->chr17:40936666-40937166->babam2	Act	0.685194	0.604271	2.45629
tcf7l1a	M00805	chr17:40944349-40944849	babam2	0.191918	Inter	0.104695	tcf7l1a->chr17:40944349-40944849->babam2	Act	0.749125	0.604271	0
tcf7l1a	M00805	chr17:40963075-40963575	babam2	0.191918	Inter	0.104695	tcf7l1a->chr17:40963075-40963575->babam2	Act	0.749125	0.604271	0
gli2a	M03902	chr17:40963075-40963575	babam2	0.260418	Inter	0.0483006	gli2a->chr17:40963075-40963575->babam2	Act	2.41799	0.604271	0
tcf7l1b	M05757_2.00	chr17:40963075-40963575	babam2	0.100263	Inter	0.0795131	tcf7l1b->chr17:40963075-40963575->babam2	Act	0.336061	0.604271	0
tcf7l1a	M08901	chr17:41081527-41082027	babam2	0.0660347	TSS	0.104695	tcf7l1a->chr17:41081527-41082027->babam2	Act	0.749125	0.604271	0
foxj3	M09114_2.00	chr17:41081527-41082027	babam2	0.0866818	TSS	0.0678352	foxj3->chr17:41081527-41082027->babam2	Act	0.808686	0.604271	0
tcf7l1b	M09386_2.00	chr17:41081527-41082027	babam2	0.24672	TSS	0.0795131	tcf7l1b->chr17:41081527-41082027->babam2	Act	0.336061	0.604271	0
runx1	M00271	chr15:34657801-34658301	bag6	0.148862	TSS	0.103409	runx1->chr15:34657801-34658301->bag6	Act	1.51009	0.461107	0
fosl2	M08915	chr15:34657801-34658301	bag6	0.207604	TSS	0.101593	fosl2->chr15:34657801-34658301->bag6	Act	2.31203	0.461107	0
foxp1a	M09806	chr15:34657801-34658301	bag6	0.0548933	TSS	0.0571447	foxp1a->chr15:34657801-34658301->bag6	Act	0.748865	0.461107	0
tcf7l1a	M00712_2.00	chr15:34657801-34658301	bag6	0.281625	TSS	0.103954	tcf7l1a->chr15:34657801-34658301->bag6	Act	0.749125	0.461107	0
tcf7l1b	M00712_2.00	chr15:34657801-34658301	bag6	0.318582	TSS	0.0706798	tcf7l1b->chr15:34657801-34658301->bag6	Act	0.336061	0.461107	0
rarga	M02706_2.00	chr3:45400978-45401478	baiap3	0.255194	Body	0.235757	rarga->chr3:45400978-45401478->baiap3	Act	0.588239	0.713785	2.91495
sox2	M02246	chr3:45169599-45170099	baiap3	0.217687	Inter	0.160991	sox2->chr3:45169599-45170099->baiap3	Act	0.777717	0.713785	0
sox8a	M02719_2.00	chr3:45169599-45170099	baiap3	0.403529	Inter	0.155328	sox8a->chr3:45169599-45170099->baiap3	Act	1.14831	0.713785	0
sox13	M02719_2.00	chr3:45169599-45170099	baiap3	0.532837	Inter	0.24684	sox13->chr3:45169599-45170099->baiap3	Act	1.40426	0.713785	0
rarga	M07994_2.00	chr3:45169599-45170099	baiap3	0.0513925	Inter	0.235757	rarga->chr3:45169599-45170099->baiap3	Act	0.588239	0.713785	0
tead1a	M04141	chr3:45173381-45173881	baiap3	0.373323	Inter	0.148167	tead1a->chr3:45173381-45173881->baiap3	Act	1.61908	0.713785	0
rarga	M05883_2.00	chr3:45173381-45173881	baiap3	0.294205	Inter	0.235757	rarga->chr3:45173381-45173881->baiap3	Act	0.588239	0.713785	0
stat3	M08015_2.00	chr3:45173381-45173881	baiap3	0.179851	Inter	0.176894	stat3->chr3:45173381-45173881->baiap3	Act	1.70202	0.713785	0
sox2	M03498_2.00	chr3:45280260-45280760	baiap3	0.168977	Inter	0.160991	sox2->chr3:45280260-45280760->baiap3	Act	0.777717	0.713785	0
sox8a	M03498_2.00	chr3:45280260-45280760	baiap3	0.17949	Inter	0.155328	sox8a->chr3:45280260-45280760->baiap3	Act	1.14831	0.713785	0
sox13	M03498_2.00	chr3:45280260-45280760	baiap3	0.214437	Inter	0.24684	sox13->chr3:45280260-45280760->baiap3	Act	1.40426	0.713785	0
tead1a	M03995_2.00	chr3:45568965-45569465	baiap3	0.397303	Inter	0.148167	tead1a->chr3:45568965-45569465->baiap3	Act	1.61908	0.713785	1.44742
nfic	M09381_2.00	chr3:45568965-45569465	baiap3	0.380148	Inter	0.173708	nfic->chr3:45568965-45569465->baiap3	Act	2.75632	0.713785	1.44742
nfic	M09815	chr3:45610664-45611164	baiap3	0.368835	Inter	0.173708	nfic->chr3:45610664-45611164->baiap3	Act	2.75632	0.713785	0
nfic	M03476_2.00	chr3:45614356-45614856	baiap3	0.287847	Inter	0.173708	nfic->chr3:45614356-45614856->baiap3	Act	2.75632	0.713785	1.93998
nfic	M03475_2.00	chr3:45614911-45615411	baiap3	0.409764	Inter	0.173708	nfic->chr3:45614911-45615411->baiap3	Act	2.75632	0.713785	4.67859
sox2	M05791_2.00	chr3:45614911-45615411	baiap3	0.401265	Inter	0.160991	sox2->chr3:45614911-45615411->baiap3	Act	0.777717	0.713785	4.67859
sox8a	M05791_2.00	chr3:45614911-45615411	baiap3	0.417525	Inter	0.155328	sox8a->chr3:45614911-45615411->baiap3	Act	1.14831	0.713785	4.67859
sox13	M05791_2.00	chr3:45614911-45615411	baiap3	0.531603	Inter	0.24684	sox13->chr3:45614911-45615411->baiap3	Act	1.40426	0.713785	4.67859
gli3	M01704	chr3:45620610-45621110	baiap3	0.068013	Inter	0.207679	gli3->chr3:45620610-45621110->baiap3	Act	0.96568	0.713785	2.44014
sox13	M09787	chr3:45620610-45621110	baiap3	0.552681	Inter	0.24684	sox13->chr3:45620610-45621110->baiap3	Act	1.40426	0.713785	2.44014
sox2	M10067	chr3:45620610-45621110	baiap3	0.445195	Inter	0.160991	sox2->chr3:45620610-45621110->baiap3	Act	0.777717	0.713785	2.44014
gli2a	M02641_2.00	chr3:45620610-45621110	baiap3	0.0629451	Inter	0.259408	gli2a->chr3:45620610-45621110->baiap3	Act	2.41799	0.713785	2.44014
sox8a	M02716_2.00	chr3:45620610-45621110	baiap3	0.379797	Inter	0.155328	sox8a->chr3:45620610-45621110->baiap3	Act	1.14831	0.713785	2.44014
nfic	M03475_2.00	chr3:45628668-45629168	baiap3	0.409764	Inter	0.173708	nfic->chr3:45628668-45629168->baiap3	Act	2.75632	0.713785	0
sox2	M05759_2.00	chr3:45628668-45629168	baiap3	0.340395	Inter	0.160991	sox2->chr3:45628668-45629168->baiap3	Act	0.777717	0.713785	0
sox8a	M05759_2.00	chr3:45628668-45629168	baiap3	0.383271	Inter	0.155328	sox8a->chr3:45628668-45629168->baiap3	Act	1.14831	0.713785	0
sox13	M05759_2.00	chr3:45628668-45629168	baiap3	0.467712	Inter	0.24684	sox13->chr3:45628668-45629168->baiap3	Act	1.40426	0.713785	0
nfic	M09815	chr3:45636848-45637348	baiap3	0.368835	Inter	0.173708	nfic->chr3:45636848-45637348->baiap3	Act	2.75632	0.713785	0
rarga	M02706_2.00	chr3:45401506-45402006	baiap3	0.255194	TSS	0.235757	rarga->chr3:45401506-45402006->baiap3	Act	0.588239	0.713785	0
e2f3	M00662_2.00	chr9:40683496-40683996	bard1	0.119089	Body	0.219936	e2f3->chr9:40683496-40683996->bard1	Act	0.665166	0.818517	0
myb	M02883	chr9:40471366-40471866	bard1	0.191164	Inter	0.275673	myb->chr9:40471366-40471866->bard1	Act	1.14685	0.818517	4.01109
mybl1	M02884	chr9:40471366-40471866	bard1	0.211325	Inter	0.33364	mybl1->chr9:40471366-40471866->bard1	Act	1.69618	0.818517	4.01109
fosl2	M07092	chr9:40471366-40471866	bard1	0.54754	Inter	0.154528	fosl2->chr9:40471366-40471866->bard1	Act	2.31203	0.818517	4.01109
esr2a	M09277_2.00	chr9:40471366-40471866	bard1	0.0734596	Inter	0.225493	esr2a->chr9:40471366-40471866->bard1	Act	1.11001	0.818517	4.01109
tcf7l1a	M00805	chr6:11829561-11830061	baz2ba	0.191918	Body	0.0885555	tcf7l1a->chr6:11829561-11830061->baz2ba	Act	0.749125	0.446386	0
mybl1	M08890	chr6:11829561-11830061	baz2ba	0.112543	Body	0.0957062	mybl1->chr6:11829561-11830061->baz2ba	Act	1.69618	0.446386	0
mybl1	M05608	chr6:11867223-11867723	baz2ba	0.0584619	Body	0.0957062	mybl1->chr6:11867223-11867723->baz2ba	Act	1.69618	0.446386	1.26801
tcf7l1a	M00805	chr6:11869410-11869910	baz2ba	0.191918	Body	0.0885555	tcf7l1a->chr6:11869410-11869910->baz2ba	Act	0.749125	0.446386	0
tcf7l1a	M01594	chr6:11828968-11829468	baz2ba	0.328895	TSS	0.0885555	tcf7l1a->chr6:11828968-11829468->baz2ba	Act	0.749125	0.446386	0
sox13	M03519_2.00	chr10:28519282-28519782	bbx	0.245099	TSS	0.0885477	sox13->chr10:28519282-28519782->bbx	Act	1.40426	0.470573	0
sox2	M02246	chr4:2826908-2827408	bcap29	0.217687	Inter	0.0714314	sox2->chr4:2826908-2827408->bcap29	Act	0.777717	0.302444	1.93474
stat3	M07229	chr4:2655120-2655620	bcap29	0.33244	TSS	0.0738362	stat3->chr4:2655120-2655620->bcap29	Act	1.70202	0.302444	0
sox2	M11331_2.00	chr4:2655120-2655620	bcap29	0.425179	TSS	0.0714314	sox2->chr4:2655120-2655620->bcap29	Act	0.777717	0.302444	0
mybl1	M10297	chr3:16265104-16265604	bckdhbl	0.315136	Body	0.101904	mybl1->chr3:16265104-16265604->bckdhbl	Act	1.69618	0.835659	0.815409
tead1a	M09434_2.00	chr3:16265104-16265604	bckdhbl	0.358917	Body	0.2693	tead1a->chr3:16265104-16265604->bckdhbl	Act	1.61908	0.835659	0.815409
mybl1	M10297	chr3:16265731-16266231	bckdhbl	0.315136	Body	0.101904	mybl1->chr3:16265731-16266231->bckdhbl	Act	1.69618	0.835659	0
sox8a	M08042_2.00	chr3:16265731-16266231	bckdhbl	0.198572	Body	0.321257	sox8a->chr3:16265731-16266231->bckdhbl	Act	1.14831	0.835659	0
sox13	M08042_2.00	chr3:16265731-16266231	bckdhbl	0.22528	Body	0.387115	sox13->chr3:16265731-16266231->bckdhbl	Act	1.40426	0.835659	0
tead1a	M09434_2.00	chr3:16265731-16266231	bckdhbl	0.358917	Body	0.2693	tead1a->chr3:16265731-16266231->bckdhbl	Act	1.61908	0.835659	0
mybl1	M04042	chr3:16289591-16290091	bckdhbl	0.0789454	Body	0.101904	mybl1->chr3:16289591-16290091->bckdhbl	Act	1.69618	0.835659	0
nfic	M09815	chr3:16289591-16290091	bckdhbl	0.368835	Body	0.285821	nfic->chr3:16289591-16290091->bckdhbl	Act	2.75632	0.835659	0
sox8a	M03981_2.00	chr3:16289591-16290091	bckdhbl	0.227666	Body	0.321257	sox8a->chr3:16289591-16290091->bckdhbl	Act	1.14831	0.835659	0
sox13	M03981_2.00	chr3:16289591-16290091	bckdhbl	0.294193	Body	0.387115	sox13->chr3:16289591-16290091->bckdhbl	Act	1.40426	0.835659	0
sox8a	M05897_2.00	chr3:16233325-16233825	bckdhbl	0.311051	Inter	0.321257	sox8a->chr3:16233325-16233825->bckdhbl	Act	1.14831	0.835659	0
sox13	M05897_2.00	chr3:16233325-16233825	bckdhbl	0.43957	Inter	0.387115	sox13->chr3:16233325-16233825->bckdhbl	Act	1.40426	0.835659	0
gli3	M01704	chr3:16291550-16292050	bckdhbl	0.068013	Inter	0.385422	gli3->chr3:16291550-16292050->bckdhbl	Act	0.96568	0.835659	0
sox8a	M04546	chr3:16291550-16292050	bckdhbl	0.229255	Inter	0.321257	sox8a->chr3:16291550-16292050->bckdhbl	Act	1.14831	0.835659	0
sox13	M03488_2.00	chr3:16291550-16292050	bckdhbl	0.240095	Inter	0.387115	sox13->chr3:16291550-16292050->bckdhbl	Act	1.40426	0.835659	0
mybl1	M08150_2.00	chr3:16291550-16292050	bckdhbl	0.130889	Inter	0.101904	mybl1->chr3:16291550-16292050->bckdhbl	Act	1.69618	0.835659	0
gli3	M01704	chr3:16292068-16292568	bckdhbl	0.068013	Inter	0.385422	gli3->chr3:16292068-16292568->bckdhbl	Act	0.96568	0.835659	0
mybl1	M08150_2.00	chr3:16292068-16292568	bckdhbl	0.130889	Inter	0.101904	mybl1->chr3:16292068-16292568->bckdhbl	Act	1.69618	0.835659	0
sox8a	M05766_2.00	chr3:16301188-16301688	bckdhbl	0.392474	Inter	0.321257	sox8a->chr3:16301188-16301688->bckdhbl	Act	1.14831	0.835659	0
sox13	M05766_2.00	chr3:16301188-16301688	bckdhbl	0.526426	Inter	0.387115	sox13->chr3:16301188-16301688->bckdhbl	Act	1.40426	0.835659	0
sox8a	M04547	chr3:16314056-16314556	bckdhbl	0.145362	Inter	0.321257	sox8a->chr3:16314056-16314556->bckdhbl	Act	1.14831	0.835659	2.65811
sox13	M03484_2.00	chr3:16314056-16314556	bckdhbl	0.141082	Inter	0.387115	sox13->chr3:16314056-16314556->bckdhbl	Act	1.40426	0.835659	2.65811
sox8a	M09397_2.00	chr3:16316776-16317276	bckdhbl	0.42786	Inter	0.321257	sox8a->chr3:16316776-16317276->bckdhbl	Act	1.14831	0.835659	0
sox13	M09397_2.00	chr3:16316776-16317276	bckdhbl	0.572946	Inter	0.387115	sox13->chr3:16316776-16317276->bckdhbl	Act	1.40426	0.835659	0
rarga	M00820_2.00	chr5:61509495-61509995	bckdk	0.114095	Body	0.238477	rarga->chr5:61509495-61509995->bckdk	Act	0.588239	0.864585	1.80184
sox8a	M03541_2.00	chr5:61509495-61509995	bckdk	0.20579	Body	0.321684	sox8a->chr5:61509495-61509995->bckdk	Act	1.14831	0.864585	1.80184
sox13	M03541_2.00	chr5:61509495-61509995	bckdk	0.235834	Body	0.303498	sox13->chr5:61509495-61509995->bckdk	Act	1.40426	0.864585	1.80184
rarga	M02706_2.00	chr5:61534823-61535323	bckdk	0.255194	Body	0.238477	rarga->chr5:61534823-61535323->bckdk	Act	0.588239	0.864585	4.75586
sox8a	M02719_2.00	chr5:61535847-61536347	bckdk	0.403529	Body	0.321684	sox8a->chr5:61535847-61536347->bckdk	Act	1.14831	0.864585	5.79155
sox13	M02719_2.00	chr5:61535847-61536347	bckdk	0.532837	Body	0.303498	sox13->chr5:61535847-61536347->bckdk	Act	1.40426	0.864585	5.79155
rarga	M00820_2.00	chr5:61537596-61538096	bckdk	0.114095	Body	0.238477	rarga->chr5:61537596-61538096->bckdk	Act	0.588239	0.864585	2.78329
rarga	M00820_2.00	chr5:61538124-61538624	bckdk	0.114095	Body	0.238477	rarga->chr5:61538124-61538624->bckdk	Act	0.588239	0.864585	4.38041
sox13	M03504_2.00	chr5:61538124-61538624	bckdk	0.0542881	Body	0.303498	sox13->chr5:61538124-61538624->bckdk	Act	1.40426	0.864585	4.38041
rarga	M06412_2.00	chr5:61696167-61696667	bckdk	0.138295	Inter	0.238477	rarga->chr5:61696167-61696667->bckdk	Act	0.588239	0.864585	4.46792
sox8a	M06449_2.00	chr5:61508081-61508581	bckdk	0.428475	TSS	0.321684	sox8a->chr5:61508081-61508581->bckdk	Act	1.14831	0.864585	0
sox13	M06449_2.00	chr5:61508081-61508581	bckdk	0.560277	TSS	0.303498	sox13->chr5:61508081-61508581->bckdk	Act	1.40426	0.864585	0
rarga	M09313_2.00	chr5:61508081-61508581	bckdk	0.344843	TSS	0.238477	rarga->chr5:61508081-61508581->bckdk	Act	0.588239	0.864585	0
rarga	M03394_2.00	chr5:61508748-61509248	bckdk	0.0508909	TSS	0.238477	rarga->chr5:61508748-61509248->bckdk	Act	0.588239	0.864585	0
rfx2	M04104	chr24:28202576-28203076	bcl2a	0.170874	Body	0.0507644	rfx2->chr24:28202576-28203076->bcl2a	Act	1.13253	0.907459	0
fosl2	M08923	chr24:28202576-28203076	bcl2a	0.539618	Body	0.108922	fosl2->chr24:28202576-28203076->bcl2a	Act	2.31203	0.907459	0
fosl2	M08915	chr24:28203081-28203581	bcl2a	0.207604	Body	0.108922	fosl2->chr24:28203081-28203581->bcl2a	Act	2.31203	0.907459	0
stat3	M07229	chr24:28209902-28210402	bcl2a	0.33244	Body	0.238	stat3->chr24:28209902-28210402->bcl2a	Act	1.70202	0.907459	3.9547
sox8a	M00197_2.00	chr24:28229330-28229830	bcl2a	0.294131	Body	0.294449	sox8a->chr24:28229330-28229830->bcl2a	Act	1.14831	0.907459	0
sox13	M00197_2.00	chr24:28229330-28229830	bcl2a	0.391172	Body	0.253485	sox13->chr24:28229330-28229830->bcl2a	Act	1.40426	0.907459	0
sox13	M03486_2.00	chr24:27985534-27986034	bcl2a	0.0628481	Inter	0.253485	sox13->chr24:27985534-27986034->bcl2a	Act	1.40426	0.907459	0
rfx2	M03453_2.00	chr24:28120758-28121258	bcl2a	0.195627	Inter	0.0507644	rfx2->chr24:28120758-28121258->bcl2a	Act	1.13253	0.907459	0
fosl2	M08915	chr24:28240408-28240908	bcl2a	0.207604	Inter	0.108922	fosl2->chr24:28240408-28240908->bcl2a	Act	2.31203	0.907459	0
sox8a	M09397_2.00	chr24:28240408-28240908	bcl2a	0.42786	Inter	0.294449	sox8a->chr24:28240408-28240908->bcl2a	Act	1.14831	0.907459	0
sox13	M09397_2.00	chr24:28240408-28240908	bcl2a	0.572946	Inter	0.253485	sox13->chr24:28240408-28240908->bcl2a	Act	1.40426	0.907459	0
myb	M00179_2.00	chr24:28228678-28229178	bcl2a	0.14176	TSS	0.109899	myb->chr24:28228678-28229178->bcl2a	Act	1.14685	0.907459	0
fosl2	M00925	chr13:47373611-47374111	bcl2l11	0.522926	Body	0.249707	fosl2->chr13:47373611-47374111->bcl2l11	Act	2.31203	1.00446	4.07043
rfx2	M04096	chr13:47373611-47374111	bcl2l11	0.209823	Body	0.211676	rfx2->chr13:47373611-47374111->bcl2l11	Act	1.13253	1.00446	4.07043
sox2	M11332_2.00	chr13:47373611-47374111	bcl2l11	0.304243	Body	0.209653	sox2->chr13:47373611-47374111->bcl2l11	Act	0.777717	1.00446	4.07043
sox13	M11332_2.00	chr13:47373611-47374111	bcl2l11	0.381417	Body	0.284191	sox13->chr13:47373611-47374111->bcl2l11	Act	1.40426	1.00446	4.07043
runx1	M00271	chr13:47376506-47377006	bcl2l11	0.148862	Body	0.212749	runx1->chr13:47376506-47377006->bcl2l11	Act	1.51009	1.00446	1.69013
fosl2	M08932	chr13:47376506-47377006	bcl2l11	0.251979	Body	0.249707	fosl2->chr13:47376506-47377006->bcl2l11	Act	2.31203	1.00446	1.69013
sox2	M08168_2.00	chr13:47376506-47377006	bcl2l11	0.444115	Body	0.209653	sox2->chr13:47376506-47377006->bcl2l11	Act	0.777717	1.00446	1.69013
sox13	M08168_2.00	chr13:47376506-47377006	bcl2l11	0.574225	Body	0.284191	sox13->chr13:47376506-47377006->bcl2l11	Act	1.40426	1.00446	1.69013
fosl2	M09923	chr13:47377512-47378012	bcl2l11	0.552769	Body	0.249707	fosl2->chr13:47377512-47378012->bcl2l11	Act	2.31203	1.00446	1.57723
rarga	M05623_2.00	chr13:47377512-47378012	bcl2l11	0.0510327	Body	0.189453	rarga->chr13:47377512-47378012->bcl2l11	Act	0.588239	1.00446	1.57723
tcf7l1a	M00805	chr13:47381519-47382019	bcl2l11	0.191918	Body	0.214824	tcf7l1a->chr13:47381519-47382019->bcl2l11	Act	0.749125	1.00446	4.46013
fosl2	M00926	chr13:47381519-47382019	bcl2l11	0.528779	Body	0.249707	fosl2->chr13:47381519-47382019->bcl2l11	Act	2.31203	1.00446	4.46013
sox2	M08899	chr13:47381519-47382019	bcl2l11	0.374741	Body	0.209653	sox2->chr13:47381519-47382019->bcl2l11	Act	0.777717	1.00446	4.46013
sox13	M08899	chr13:47381519-47382019	bcl2l11	0.46894	Body	0.284191	sox13->chr13:47381519-47382019->bcl2l11	Act	1.40426	1.00446	4.46013
stat3	M09714	chr13:47381519-47382019	bcl2l11	0.305177	Body	0.20141	stat3->chr13:47381519-47382019->bcl2l11	Act	1.70202	1.00446	4.46013
runx1	M03464_2.00	chr13:47381519-47382019	bcl2l11	0.194631	Body	0.212749	runx1->chr13:47381519-47382019->bcl2l11	Act	1.51009	1.00446	4.46013
rarga	M09282_2.00	chr13:47381519-47382019	bcl2l11	0.338476	Body	0.189453	rarga->chr13:47381519-47382019->bcl2l11	Act	0.588239	1.00446	4.46013
tcf7l1a	M00805	chr13:47401158-47401658	bcl2l11	0.191918	Body	0.214824	tcf7l1a->chr13:47401158-47401658->bcl2l11	Act	0.749125	1.00446	2.08749
stat3	M07065	chr13:47401158-47401658	bcl2l11	0.335993	Body	0.20141	stat3->chr13:47401158-47401658->bcl2l11	Act	1.70202	1.00446	2.08749
tcf7l1b	M05781_2.00	chr13:47401158-47401658	bcl2l11	0.132596	Body	0.204467	tcf7l1b->chr13:47401158-47401658->bcl2l11	Act	0.336061	1.00446	2.08749
runx1	M09370_2.00	chr13:47401158-47401658	bcl2l11	0.235119	Body	0.212749	runx1->chr13:47401158-47401658->bcl2l11	Act	1.51009	1.00446	2.08749
sox2	M09389_2.00	chr13:47401158-47401658	bcl2l11	0.446999	Body	0.209653	sox2->chr13:47401158-47401658->bcl2l11	Act	0.777717	1.00446	2.08749
sox13	M09389_2.00	chr13:47401158-47401658	bcl2l11	0.609713	Body	0.284191	sox13->chr13:47401158-47401658->bcl2l11	Act	1.40426	1.00446	2.08749
sox2	M07225	chr13:47402654-47403154	bcl2l11	0.414659	Body	0.209653	sox2->chr13:47402654-47403154->bcl2l11	Act	0.777717	1.00446	2.74137
sox13	M01026_2.00	chr13:47402654-47403154	bcl2l11	0.499614	Body	0.284191	sox13->chr13:47402654-47403154->bcl2l11	Act	1.40426	1.00446	2.74137
stat3	M08015_2.00	chr13:47402654-47403154	bcl2l11	0.179851	Body	0.20141	stat3->chr13:47402654-47403154->bcl2l11	Act	1.70202	1.00446	2.74137
sox2	M00197_2.00	chr13:47403228-47403728	bcl2l11	0.312264	Body	0.209653	sox2->chr13:47403228-47403728->bcl2l11	Act	0.777717	1.00446	1.41101
sox13	M00197_2.00	chr13:47403228-47403728	bcl2l11	0.391172	Body	0.284191	sox13->chr13:47403228-47403728->bcl2l11	Act	1.40426	1.00446	1.41101
erf	M04743_2.00	chr13:47403228-47403728	bcl2l11	0.124016	Body	0.17411	erf->chr13:47403228-47403728->bcl2l11	Act	0.721766	1.00446	1.41101
erfl3	M04743_2.00	chr13:47403228-47403728	bcl2l11	0.14397	Body	0.211902	erfl3->chr13:47403228-47403728->bcl2l11	Act	1.01761	1.00446	1.41101
stat3	M08015_2.00	chr13:47403228-47403728	bcl2l11	0.179851	Body	0.20141	stat3->chr13:47403228-47403728->bcl2l11	Act	1.70202	1.00446	1.41101
runx1	M00271	chr13:47212661-47213161	bcl2l11	0.148862	Inter	0.212749	runx1->chr13:47212661-47213161->bcl2l11	Act	1.51009	1.00446	5.36063
tcf7l1a	M00805	chr13:47212661-47213161	bcl2l11	0.191918	Inter	0.214824	tcf7l1a->chr13:47212661-47213161->bcl2l11	Act	0.749125	1.00446	5.36063
fosl2	M00924	chr13:47212661-47213161	bcl2l11	0.534263	Inter	0.249707	fosl2->chr13:47212661-47213161->bcl2l11	Act	2.31203	1.00446	5.36063
sox2	M03487_2.00	chr13:47212661-47213161	bcl2l11	0.109219	Inter	0.209653	sox2->chr13:47212661-47213161->bcl2l11	Act	0.777717	1.00446	5.36063
sox13	M03487_2.00	chr13:47212661-47213161	bcl2l11	0.137222	Inter	0.284191	sox13->chr13:47212661-47213161->bcl2l11	Act	1.40426	1.00446	5.36063
tead1a	M03575_2.00	chr13:47212661-47213161	bcl2l11	0.193302	Inter	0.291248	tead1a->chr13:47212661-47213161->bcl2l11	Act	1.61908	1.00446	5.36063
rarga	M09278_2.00	chr13:47212661-47213161	bcl2l11	0.129306	Inter	0.189453	rarga->chr13:47212661-47213161->bcl2l11	Act	0.588239	1.00446	5.36063
fosl2	M08914	chr13:47223405-47223905	bcl2l11	0.549263	Inter	0.249707	fosl2->chr13:47223405-47223905->bcl2l11	Act	2.31203	1.00446	3.89005
stat3	M09714	chr13:47223405-47223905	bcl2l11	0.305177	Inter	0.20141	stat3->chr13:47223405-47223905->bcl2l11	Act	1.70202	1.00446	3.89005
tcf7l1a	M09400_2.00	chr13:47223405-47223905	bcl2l11	0.347609	Inter	0.214824	tcf7l1a->chr13:47223405-47223905->bcl2l11	Act	0.749125	1.00446	3.89005
tcf7l1b	M09400_2.00	chr13:47223405-47223905	bcl2l11	0.417512	Inter	0.204467	tcf7l1b->chr13:47223405-47223905->bcl2l11	Act	0.336061	1.00446	3.89005
sox2	M01272	chr13:47231410-47231910	bcl2l11	0.326862	Inter	0.209653	sox2->chr13:47231410-47231910->bcl2l11	Act	0.777717	1.00446	0
tead1a	M04142	chr13:47231410-47231910	bcl2l11	0.149864	Inter	0.291248	tead1a->chr13:47231410-47231910->bcl2l11	Act	1.61908	1.00446	0
sox13	M08041_2.00	chr13:47231410-47231910	bcl2l11	0.372203	Inter	0.284191	sox13->chr13:47231410-47231910->bcl2l11	Act	1.40426	1.00446	0
erf	M08881	chr13:47414029-47414529	bcl2l11	0.220012	Inter	0.17411	erf->chr13:47414029-47414529->bcl2l11	Act	0.721766	1.00446	0
sox2	M00197_2.00	chr13:47414029-47414529	bcl2l11	0.312264	Inter	0.209653	sox2->chr13:47414029-47414529->bcl2l11	Act	0.777717	1.00446	0
sox13	M00197_2.00	chr13:47414029-47414529	bcl2l11	0.391172	Inter	0.284191	sox13->chr13:47414029-47414529->bcl2l11	Act	1.40426	1.00446	0
erfl3	M04717_2.00	chr13:47414029-47414529	bcl2l11	0.0699981	Inter	0.211902	erfl3->chr13:47414029-47414529->bcl2l11	Act	1.01761	1.00446	0
foxn4	M04645	chr1:47356517-47357017	bcl9	0.110591	Body	0.209903	foxn4->chr1:47356517-47357017->bcl9	Act	1.98217	0.393729	2.8067
gli2a	M05331	chr1:47356517-47357017	bcl9	0.0593127	Body	0.160203	gli2a->chr1:47356517-47357017->bcl9	Act	2.41799	0.393729	2.8067
runx1	M00271	chr1:47106340-47106840	bcl9	0.148862	Inter	0.14716	runx1->chr1:47106340-47106840->bcl9	Act	1.51009	0.393729	2.6845
rfx2	M04095	chr1:47106340-47106840	bcl9	0.358754	Inter	0.158728	rfx2->chr1:47106340-47106840->bcl9	Act	1.13253	0.393729	2.6845
myb	M00180_2.00	chr1:47106340-47106840	bcl9	0.181524	Inter	0.139142	myb->chr1:47106340-47106840->bcl9	Act	1.14685	0.393729	2.6845
mybl1	M00180_2.00	chr1:47106340-47106840	bcl9	0.251215	Inter	0.207773	mybl1->chr1:47106340-47106840->bcl9	Act	1.69618	0.393729	2.6845
myb	M08890	chr1:47137413-47137913	bcl9	0.0816041	Inter	0.139142	myb->chr1:47137413-47137913->bcl9	Act	1.14685	0.393729	1.09744
mybl1	M08890	chr1:47137413-47137913	bcl9	0.112543	Inter	0.207773	mybl1->chr1:47137413-47137913->bcl9	Act	1.69618	0.393729	1.09744
mybl1	M02780	chr1:47154268-47154768	bcl9	0.161062	Inter	0.207773	mybl1->chr1:47154268-47154768->bcl9	Act	1.69618	0.393729	3.77539
fosl2	M04036_2.00	chr1:47154268-47154768	bcl9	0.26723	Inter	0.170685	fosl2->chr1:47154268-47154768->bcl9	Act	2.31203	0.393729	3.77539
tcf7l1a	M09400_2.00	chr1:47154268-47154768	bcl9	0.347609	Inter	0.174475	tcf7l1a->chr1:47154268-47154768->bcl9	Act	0.749125	0.393729	3.77539
rfx2	M04096	chr1:47228948-47229448	bcl9	0.209823	Inter	0.158728	rfx2->chr1:47228948-47229448->bcl9	Act	1.13253	0.393729	1.33242
tead1a	M03576_2.00	chr1:47228948-47229448	bcl9	0.401935	Inter	0.223749	tead1a->chr1:47228948-47229448->bcl9	Act	1.61908	0.393729	1.33242
tcf7l1a	M01594	chr1:47314124-47314624	bcl9	0.328895	Inter	0.174475	tcf7l1a->chr1:47314124-47314624->bcl9	Act	0.749125	0.393729	4.65503
fosl2	M03870	chr1:47314124-47314624	bcl9	0.542626	Inter	0.170685	fosl2->chr1:47314124-47314624->bcl9	Act	2.31203	0.393729	4.65503
fosl2	M04336_2.00	chr1:47515012-47515512	bcl9	0.522506	Inter	0.170685	fosl2->chr1:47515012-47515512->bcl9	Act	2.31203	0.393729	0
fosl2	M04336_2.00	chr1:47515581-47516081	bcl9	0.522506	Inter	0.170685	fosl2->chr1:47515581-47516081->bcl9	Act	2.31203	0.393729	2.17324
tcf7l1a	M08428_2.00	chr1:47515581-47516081	bcl9	0.125433	Inter	0.174475	tcf7l1a->chr1:47515581-47516081->bcl9	Act	0.749125	0.393729	2.17324
rfx2	M00975	chr1:47331334-47331834	bcl9	0.200446	TSS	0.158728	rfx2->chr1:47331334-47331834->bcl9	Act	1.13253	0.393729	0
mybl1	M05608	chr1:47331334-47331834	bcl9	0.0584619	TSS	0.207773	mybl1->chr1:47331334-47331834->bcl9	Act	1.69618	0.393729	0
tead1a	M03995_2.00	chr1:47391161-47391661	bcl9	0.397303	TSS	0.223749	tead1a->chr1:47391161-47391661->bcl9	Act	1.61908	0.393729	1.57404
runx1	M05731_2.00	chr1:47391161-47391661	bcl9	0.0956079	TSS	0.14716	runx1->chr1:47391161-47391661->bcl9	Act	1.51009	0.393729	1.57404
hlfa	M04212	chr5:30074139-30074639	bco2a	0.283017	Body	0.188085	hlfa->chr5:30074139-30074639->bco2a	Act	0.589804	0.816128	2.40213
sox8a	M08039	chr5:30074139-30074639	bco2a	0.108699	Body	0.273231	sox8a->chr5:30074139-30074639->bco2a	Act	1.14831	0.816128	2.40213
nfic	M03475_2.00	chr5:30074139-30074639	bco2a	0.409764	Body	0.134173	nfic->chr5:30074139-30074639->bco2a	Act	2.75632	0.816128	2.40213
sox8a	M02912	chr5:29971880-29972380	bco2a	0.0695312	Inter	0.273231	sox8a->chr5:29971880-29972380->bco2a	Act	1.14831	0.816128	6.42881
gli2a	M02641_2.00	chr5:29971880-29972380	bco2a	0.0629451	Inter	0.232248	gli2a->chr5:29971880-29972380->bco2a	Act	2.41799	0.816128	6.42881
sox8a	M00197_2.00	chr23:19812354-19812854	bgnb	0.294131	Inter	0.428471	sox8a->chr23:19812354-19812854->bgnb	Act	1.14831	2.01	0
hlfa	M04212	chr23:20075443-20075943	bgnb	0.283017	Inter	0.312643	hlfa->chr23:20075443-20075943->bgnb	Act	0.589804	2.01	4.55035
stat3	M00223	chr23:20078473-20078973	bgnb	0.269873	Inter	0.344766	stat3->chr23:20078473-20078973->bgnb	Act	1.70202	2.01	4.74146
sox8a	M00205_2.00	chr23:20078473-20078973	bgnb	0.269599	Inter	0.428471	sox8a->chr23:20078473-20078973->bgnb	Act	1.14831	2.01	4.74146
tead1a	M05825_2.00	chr23:20078473-20078973	bgnb	0.390565	Inter	0.0902425	tead1a->chr23:20078473-20078973->bgnb	Act	1.61908	2.01	4.74146
rarga	M07994_2.00	chr23:20078473-20078973	bgnb	0.0513925	Inter	0.327629	rarga->chr23:20078473-20078973->bgnb	Act	0.588239	2.01	4.74146
rarga	M05606_2.00	chr23:20165318-20165818	bgnb	0.0624392	Inter	0.327629	rarga->chr23:20165318-20165818->bgnb	Act	0.588239	2.01	0
rarga	M09265_2.00	chr23:20171509-20172009	bgnb	0.229504	Inter	0.327629	rarga->chr23:20171509-20172009->bgnb	Act	0.588239	2.01	2.93469
sox8a	M05790_2.00	chr11:35761216-35761716	bhlhe40	0.342321	Body	0.204243	sox8a->chr11:35761216-35761716->bhlhe40	Act	1.14831	0.769387	0
sox8a	M03537_2.00	chr11:35763128-35763628	bhlhe40	0.0554616	Body	0.204243	sox8a->chr11:35763128-35763628->bhlhe40	Act	1.14831	0.769387	1.28487
sox8a	M11331_2.00	chr11:35868188-35868688	bhlhe40	0.448372	Inter	0.204243	sox8a->chr11:35868188-35868688->bhlhe40	Act	1.14831	0.769387	1.47783
gli2a	M03902	chr11:35874975-35875475	bhlhe40	0.260418	Inter	0.148024	gli2a->chr11:35874975-35875475->bhlhe40	Act	2.41799	0.769387	2.56969
hlfa	M04246_2.00	chr11:35874975-35875475	bhlhe40	0.283824	Inter	0.167114	hlfa->chr11:35874975-35875475->bhlhe40	Act	0.589804	0.769387	2.56969
hlfa	M00260	chr11:35885188-35885688	bhlhe40	0.245076	Inter	0.167114	hlfa->chr11:35885188-35885688->bhlhe40	Act	0.589804	0.769387	1.74303
sox8a	M02718_2.00	chr11:35891462-35891962	bhlhe40	0.266489	Inter	0.204243	sox8a->chr11:35891462-35891962->bhlhe40	Act	1.14831	0.769387	0.993119
nfic	M03476_2.00	chr11:35891462-35891962	bhlhe40	0.287847	Inter	0.0897786	nfic->chr11:35891462-35891962->bhlhe40	Act	2.75632	0.769387	0.993119
gli2a	M03902	chr12:7276667-7277167	bicc1b	0.260418	Inter	0.184368	gli2a->chr12:7276667-7277167->bicc1b	Act	2.41799	0.355158	0
sox8a	M01026_2.00	chr12:7276667-7277167	bicc1b	0.365741	Inter	0.15622	sox8a->chr12:7276667-7277167->bicc1b	Act	1.14831	0.355158	0
sox13	M01026_2.00	chr12:7276667-7277167	bicc1b	0.499614	Inter	0.163757	sox13->chr12:7276667-7277167->bicc1b	Act	1.40426	0.355158	0
gli3	M02876_2.00	chr12:7276667-7277167	bicc1b	0.226579	Inter	0.145253	gli3->chr12:7276667-7277167->bicc1b	Act	0.96568	0.355158	0
tbx4	M08044_2.00	chr12:7276667-7277167	bicc1b	0.0681281	Inter	0.122257	tbx4->chr12:7276667-7277167->bicc1b	Act	0.88484	0.355158	0
sox8a	M05765_2.00	chr12:7281828-7282328	bicc1b	0.406229	Inter	0.15622	sox8a->chr12:7281828-7282328->bicc1b	Act	1.14831	0.355158	0
sox13	M05765_2.00	chr12:7281828-7282328	bicc1b	0.546137	Inter	0.163757	sox13->chr12:7281828-7282328->bicc1b	Act	1.40426	0.355158	0
sox8a	M08165_2.00	chr12:7293087-7293587	bicc1b	0.390511	Inter	0.15622	sox8a->chr12:7293087-7293587->bicc1b	Act	1.14831	0.355158	4.5853
sox13	M08165_2.00	chr12:7293087-7293587	bicc1b	0.518564	Inter	0.163757	sox13->chr12:7293087-7293587->bicc1b	Act	1.40426	0.355158	4.5853
sox8a	M03495_2.00	chr12:7510079-7510579	bicc1b	0.158582	Inter	0.15622	sox8a->chr12:7510079-7510579->bicc1b	Act	1.14831	0.355158	0
sox13	M03495_2.00	chr12:7510079-7510579	bicc1b	0.212297	Inter	0.163757	sox13->chr12:7510079-7510579->bicc1b	Act	1.40426	0.355158	0
sox8a	M05751_2.00	chr12:7608245-7608745	bicc1b	0.499782	Inter	0.15622	sox8a->chr12:7608245-7608745->bicc1b	Act	1.14831	0.355158	3.04397
sox13	M05751_2.00	chr12:7608245-7608745	bicc1b	0.592029	Inter	0.163757	sox13->chr12:7608245-7608745->bicc1b	Act	1.40426	0.355158	3.04397
sox8a	M09387_2.00	chr12:7644090-7644590	bicc1b	0.489069	Inter	0.15622	sox8a->chr12:7644090-7644590->bicc1b	Act	1.14831	0.355158	1.99977
sox13	M09387_2.00	chr12:7644090-7644590	bicc1b	0.596314	Inter	0.163757	sox13->chr12:7644090-7644590->bicc1b	Act	1.40426	0.355158	1.99977
nfic	M03475_2.00	chr18:26429124-26429624	blm	0.409764	Body	0.150194	nfic->chr18:26429124-26429624->blm	Act	2.75632	0.550756	0
rarga	M03562	chr8:51267530-51268030	bmp1a	0.0655841	Body	0.201822	rarga->chr8:51267530-51268030->bmp1a	Act	0.588239	0.337176	1.20627
sox8a	M08039	chr8:51267530-51268030	bmp1a	0.108699	Body	0.22523	sox8a->chr8:51267530-51268030->bmp1a	Act	1.14831	0.337176	1.20627
sox2	M02719_2.00	chr8:51267530-51268030	bmp1a	0.410213	Body	0.176565	sox2->chr8:51267530-51268030->bmp1a	Act	0.777717	0.337176	1.20627
sox13	M02719_2.00	chr8:51267530-51268030	bmp1a	0.532837	Body	0.244475	sox13->chr8:51267530-51268030->bmp1a	Act	1.40426	0.337176	1.20627
stat3	M00225	chr8:51293057-51293557	bmp1a	0.283617	Body	0.219078	stat3->chr8:51293057-51293557->bmp1a	Act	1.70202	0.337176	0
sox8a	M02912	chr8:51411836-51412336	bmp1a	0.0695312	Inter	0.22523	sox8a->chr8:51411836-51412336->bmp1a	Act	1.14831	0.337176	2.95742
stat3	M09664	chr8:51411836-51412336	bmp1a	0.37314	Inter	0.219078	stat3->chr8:51411836-51412336->bmp1a	Act	1.70202	0.337176	2.95742
rarga	M08152_2.00	chr8:51411836-51412336	bmp1a	0.20127	Inter	0.201822	rarga->chr8:51411836-51412336->bmp1a	Act	0.588239	0.337176	2.95742
sox2	M03494_2.00	chr8:51416396-51416896	bmp1a	0.0696788	Inter	0.176565	sox2->chr8:51416396-51416896->bmp1a	Act	0.777717	0.337176	4.43088
sox13	M03494_2.00	chr8:51416396-51416896	bmp1a	0.0812946	Inter	0.244475	sox13->chr8:51416396-51416896->bmp1a	Act	1.40426	0.337176	4.43088
sox8a	M03507_2.00	chr8:51416396-51416896	bmp1a	0.0937894	Inter	0.22523	sox8a->chr8:51416396-51416896->bmp1a	Act	1.14831	0.337176	4.43088
sox13	M03486_2.00	chr8:51292285-51292785	bmp1a	0.0628481	TSS	0.244475	sox13->chr8:51292285-51292785->bmp1a	Act	1.40426	0.337176	0
sox2	M03486_2.00	chr8:51292285-51292785	bmp1a	0.0669492	TSS	0.176565	sox2->chr8:51292285-51292785->bmp1a	Act	0.777717	0.337176	0
sox8a	M03539_2.00	chr8:51292285-51292785	bmp1a	0.0519647	TSS	0.22523	sox8a->chr8:51292285-51292785->bmp1a	Act	1.14831	0.337176	0
rarga	M11091_2.00	chr8:51292285-51292785	bmp1a	0.28648	TSS	0.201822	rarga->chr8:51292285-51292785->bmp1a	Act	0.588239	0.337176	0
sox8a	M06449_2.00	chr5:39099215-39099715	bmp2k	0.428475	Body	0.479091	sox8a->chr5:39099215-39099715->bmp2k	Act	1.14831	1.56075	0
sox13	M06449_2.00	chr5:39099215-39099715	bmp2k	0.560277	Body	0.484959	sox13->chr5:39099215-39099715->bmp2k	Act	1.40426	1.56075	0
sox8a	M01014	chr5:39116651-39117151	bmp2k	0.328759	Body	0.479091	sox8a->chr5:39116651-39117151->bmp2k	Act	1.14831	1.56075	4.3844
sox13	M01014	chr5:39116651-39117151	bmp2k	0.447704	Body	0.484959	sox13->chr5:39116651-39117151->bmp2k	Act	1.40426	1.56075	4.3844
tcf7l1a	M08902	chr5:39116651-39117151	bmp2k	0.203955	Body	0.0744787	tcf7l1a->chr5:39116651-39117151->bmp2k	Act	0.749125	1.56075	4.3844
tcf7l1a	M00805	chr5:39119232-39119732	bmp2k	0.191918	Body	0.0744787	tcf7l1a->chr5:39119232-39119732->bmp2k	Act	0.749125	1.56075	3.13476
sox8a	M03496_2.00	chr5:39119232-39119732	bmp2k	0.199349	Body	0.479091	sox8a->chr5:39119232-39119732->bmp2k	Act	1.14831	1.56075	3.13476
sox13	M03496_2.00	chr5:39119232-39119732	bmp2k	0.23128	Body	0.484959	sox13->chr5:39119232-39119732->bmp2k	Act	1.40426	1.56075	3.13476
sox8a	M01014	chr5:39126542-39127042	bmp2k	0.328759	Body	0.479091	sox8a->chr5:39126542-39127042->bmp2k	Act	1.14831	1.56075	2.56618
sox13	M01014	chr5:39126542-39127042	bmp2k	0.447704	Body	0.484959	sox13->chr5:39126542-39127042->bmp2k	Act	1.40426	1.56075	2.56618
stat3	M01220	chr5:39126542-39127042	bmp2k	0.281591	Body	0.386882	stat3->chr5:39126542-39127042->bmp2k	Act	1.70202	1.56075	2.56618
tcf7l1a	M01594	chr5:39126542-39127042	bmp2k	0.328895	Body	0.0744787	tcf7l1a->chr5:39126542-39127042->bmp2k	Act	0.749125	1.56075	2.56618
nfixa	M02050	chr5:39126542-39127042	bmp2k	0.288932	Body	0.362314	nfixa->chr5:39126542-39127042->bmp2k	Act	2.03913	1.56075	2.56618
nfic	M09379_2.00	chr5:39126542-39127042	bmp2k	0.391555	Body	0.401882	nfic->chr5:39126542-39127042->bmp2k	Act	2.75632	1.56075	2.56618
gli3	M02643_2.00	chr5:39098644-39099144	bmp2k	0.0661205	TSS	0.429428	gli3->chr5:39098644-39099144->bmp2k	Act	0.96568	1.56075	0.864526
sox8a	M08041_2.00	chr5:39098644-39099144	bmp2k	0.280954	TSS	0.479091	sox8a->chr5:39098644-39099144->bmp2k	Act	1.14831	1.56075	0.864526
sox13	M08041_2.00	chr5:39098644-39099144	bmp2k	0.372203	TSS	0.484959	sox13->chr5:39098644-39099144->bmp2k	Act	1.40426	1.56075	0.864526
stat3	M01220	chr23:6495233-6495733	bmp7b	0.281591	Body	0.367806	stat3->chr23:6495233-6495733->bmp7b	Act	1.70202	0.817061	3.21542
nfixa	M04058	chr23:6495233-6495733	bmp7b	0.287683	Body	0.337605	nfixa->chr23:6495233-6495733->bmp7b	Act	2.03913	0.817061	3.21542
nfic	M03475_2.00	chr23:6495233-6495733	bmp7b	0.409764	Body	0.337512	nfic->chr23:6495233-6495733->bmp7b	Act	2.75632	0.817061	3.21542
sox8a	M05765_2.00	chr23:6521847-6522347	bmp7b	0.406229	Body	0.462768	sox8a->chr23:6521847-6522347->bmp7b	Act	1.14831	0.817061	1.23434
sox13	M05765_2.00	chr23:6521847-6522347	bmp7b	0.546137	Body	0.441097	sox13->chr23:6521847-6522347->bmp7b	Act	1.40426	0.817061	1.23434
nfixa	M09381_2.00	chr23:6521847-6522347	bmp7b	0.281924	Body	0.337605	nfixa->chr23:6521847-6522347->bmp7b	Act	2.03913	0.817061	1.23434
nfic	M09381_2.00	chr23:6521847-6522347	bmp7b	0.380148	Body	0.337512	nfic->chr23:6521847-6522347->bmp7b	Act	2.75632	0.817061	1.23434
sox8a	M03976_2.00	chr23:6376185-6376685	bmp7b	0.334215	Inter	0.462768	sox8a->chr23:6376185-6376685->bmp7b	Act	1.14831	0.817061	1.18245
sox13	M03976_2.00	chr23:6376185-6376685	bmp7b	0.421027	Inter	0.441097	sox13->chr23:6376185-6376685->bmp7b	Act	1.40426	0.817061	1.18245
sox8a	M00213_2.00	chr23:6388325-6388825	bmp7b	0.362965	Inter	0.462768	sox8a->chr23:6388325-6388825->bmp7b	Act	1.14831	0.817061	0
sox13	M00213_2.00	chr23:6388325-6388825	bmp7b	0.486407	Inter	0.441097	sox13->chr23:6388325-6388825->bmp7b	Act	1.40426	0.817061	0
nfixa	M09381_2.00	chr23:6521252-6521752	bmp7b	0.281924	TSS	0.337605	nfixa->chr23:6521252-6521752->bmp7b	Act	2.03913	0.817061	0
nfic	M09381_2.00	chr23:6521252-6521752	bmp7b	0.380148	TSS	0.337512	nfic->chr23:6521252-6521752->bmp7b	Act	2.75632	0.817061	0
tead1a	M04141	chr13:22612064-22612564	bmpr1aa	0.373323	Body	0.234343	tead1a->chr13:22612064-22612564->bmpr1aa	Act	1.61908	0.592517	0
gli2a	M03902	chr13:22307738-22308238	bmpr1aa	0.260418	Inter	0.459488	gli2a->chr13:22307738-22308238->bmpr1aa	Act	2.41799	0.592517	2.55434
gli3	M02876_2.00	chr13:22307738-22308238	bmpr1aa	0.226579	Inter	0.351718	gli3->chr13:22307738-22308238->bmpr1aa	Act	0.96568	0.592517	2.55434
sox8a	M09405_2.00	chr13:22307738-22308238	bmpr1aa	0.444133	Inter	0.365462	sox8a->chr13:22307738-22308238->bmpr1aa	Act	1.14831	0.592517	2.55434
sox13	M09405_2.00	chr13:22307738-22308238	bmpr1aa	0.587795	Inter	0.389343	sox13->chr13:22307738-22308238->bmpr1aa	Act	1.40426	0.592517	2.55434
sox8a	M08039	chr13:22340039-22340539	bmpr1aa	0.108699	Inter	0.365462	sox8a->chr13:22340039-22340539->bmpr1aa	Act	1.14831	0.592517	0
sox13	M03483_2.00	chr13:22340039-22340539	bmpr1aa	0.121407	Inter	0.389343	sox13->chr13:22340039-22340539->bmpr1aa	Act	1.40426	0.592517	0
sox8a	M08899	chr12:25995328-25995828	bmpr1ab	0.313319	Body	0.367103	sox8a->chr12:25995328-25995828->bmpr1ab	Act	1.14831	0.480908	3.32089
sox13	M08899	chr12:25995328-25995828	bmpr1ab	0.46894	Body	0.433402	sox13->chr12:25995328-25995828->bmpr1ab	Act	1.40426	0.480908	3.32089
sox8a	M06559_2.00	chr12:26022506-26023006	bmpr1ab	0.389744	Body	0.367103	sox8a->chr12:26022506-26023006->bmpr1ab	Act	1.14831	0.480908	0
sox13	M06559_2.00	chr12:26022506-26023006	bmpr1ab	0.528252	Body	0.433402	sox13->chr12:26022506-26023006->bmpr1ab	Act	1.40426	0.480908	0
sox8a	M00201_2.00	chr12:26190435-26190935	bmpr1ab	0.19628	Inter	0.367103	sox8a->chr12:26190435-26190935->bmpr1ab	Act	1.14831	0.480908	4.54927
sox13	M00201_2.00	chr12:26190435-26190935	bmpr1ab	0.287812	Inter	0.433402	sox13->chr12:26190435-26190935->bmpr1ab	Act	1.40426	0.480908	4.54927
nfic	M09635_2.00	chr12:26190435-26190935	bmpr1ab	0.305547	Inter	0.330329	nfic->chr12:26190435-26190935->bmpr1ab	Act	2.75632	0.480908	4.54927
sox8a	M06559_2.00	chr12:26021869-26022369	bmpr1ab	0.389744	TSS	0.367103	sox8a->chr12:26021869-26022369->bmpr1ab	Act	1.14831	0.480908	0
sox13	M06559_2.00	chr12:26021869-26022369	bmpr1ab	0.528252	TSS	0.433402	sox13->chr12:26021869-26022369->bmpr1ab	Act	1.40426	0.480908	0
gli2a	M03902	chr5:7711995-7712495	bmpr1ba	0.260418	Body	0.454817	gli2a->chr5:7711995-7712495->bmpr1ba	Act	2.41799	0.840202	0
sox8a	M03971_2.00	chr10:1105344-1105844	bmpr1bb	0.144076	Body	0.246869	sox8a->chr10:1105344-1105844->bmpr1bb	Act	1.14831	0.39305	0
sox8a	M03487_2.00	chr10:1133038-1133538	bmpr1bb	0.0815095	Body	0.246869	sox8a->chr10:1133038-1133538->bmpr1bb	Act	1.14831	0.39305	0
sox8a	M08899	chr10:1144148-1144648	bmpr1bb	0.313319	Body	0.246869	sox8a->chr10:1144148-1144648->bmpr1bb	Act	1.14831	0.39305	0
sox8a	M06559_2.00	chr10:1146932-1147432	bmpr1bb	0.389744	Body	0.246869	sox8a->chr10:1146932-1147432->bmpr1bb	Act	1.14831	0.39305	0
nfixa	M02050	chr10:1148227-1148727	bmpr1bb	0.288932	Body	0.179425	nfixa->chr10:1148227-1148727->bmpr1bb	Act	2.03913	0.39305	0.835138
sox8a	M06448_2.00	chr10:1148227-1148727	bmpr1bb	0.378589	Body	0.246869	sox8a->chr10:1148227-1148727->bmpr1bb	Act	1.14831	0.39305	0.835138
sox8a	M02719_2.00	chr10:932688-933188	bmpr1bb	0.403529	Inter	0.246869	sox8a->chr10:932688-933188->bmpr1bb	Act	1.14831	0.39305	0
fosl2	M03870	chr25:34451448-34451948	bnip2	0.542626	Inter	0.0624981	fosl2->chr25:34451448-34451948->bnip2	Act	2.31203	0.302034	3.48016
tcf7l1a	M09386_2.00	chr25:34246322-34246822	bnip2	0.189699	TSS	0.0586309	tcf7l1a->chr25:34246322-34246822->bnip2	Act	0.749125	0.302034	0
tead1a	M03576_2.00	chr24:21228895-21229395	boc	0.401935	Body	0.400738	tead1a->chr24:21228895-21229395->boc	Act	1.61908	1.1723	0
sox2	M05760_2.00	chr24:21228895-21229395	boc	0.37884	Body	0.367871	sox2->chr24:21228895-21229395->boc	Act	0.777717	1.1723	0
sox8a	M05760_2.00	chr24:21228895-21229395	boc	0.415106	Body	0.524595	sox8a->chr24:21228895-21229395->boc	Act	1.14831	1.1723	0
sox13	M05760_2.00	chr24:21228895-21229395	boc	0.517505	Body	0.551887	sox13->chr24:21228895-21229395->boc	Act	1.40426	1.1723	0
nfixa	M00193	chr24:21242819-21243319	boc	0.247962	Body	0.333532	nfixa->chr24:21242819-21243319->boc	Act	2.03913	1.1723	1.6683
stat3	M09714	chr24:21242819-21243319	boc	0.305177	Body	0.441738	stat3->chr24:21242819-21243319->boc	Act	1.70202	1.1723	1.6683
runx1	M03464_2.00	chr24:21242819-21243319	boc	0.194631	Body	0.25447	runx1->chr24:21242819-21243319->boc	Act	1.51009	1.1723	1.6683
sox2	M03498_2.00	chr24:21242819-21243319	boc	0.168977	Body	0.367871	sox2->chr24:21242819-21243319->boc	Act	0.777717	1.1723	1.6683
sox8a	M03498_2.00	chr24:21242819-21243319	boc	0.17949	Body	0.524595	sox8a->chr24:21242819-21243319->boc	Act	1.14831	1.1723	1.6683
sox13	M03498_2.00	chr24:21242819-21243319	boc	0.214437	Body	0.551887	sox13->chr24:21242819-21243319->boc	Act	1.40426	1.1723	1.6683
nfixa	M00193	chr24:21243370-21243870	boc	0.247962	Body	0.333532	nfixa->chr24:21243370-21243870->boc	Act	2.03913	1.1723	1.91692
stat3	M09714	chr24:21243370-21243870	boc	0.305177	Body	0.441738	stat3->chr24:21243370-21243870->boc	Act	1.70202	1.1723	1.91692
runx1	M03464_2.00	chr24:21243370-21243870	boc	0.194631	Body	0.25447	runx1->chr24:21243370-21243870->boc	Act	1.51009	1.1723	1.91692
gli3	M01704	chr24:21245544-21246044	boc	0.068013	Body	0.521147	gli3->chr24:21245544-21246044->boc	Act	0.96568	1.1723	1.55238
sox8a	M02912	chr24:21245544-21246044	boc	0.0695312	Body	0.524595	sox8a->chr24:21245544-21246044->boc	Act	1.14831	1.1723	1.55238
gli2a	M02641_2.00	chr24:21245544-21246044	boc	0.0629451	Body	0.716924	gli2a->chr24:21245544-21246044->boc	Act	2.41799	1.1723	1.55238
sox2	M03488_2.00	chr24:21245544-21246044	boc	0.171217	Body	0.367871	sox2->chr24:21245544-21246044->boc	Act	0.777717	1.1723	1.55238
sox13	M03488_2.00	chr24:21245544-21246044	boc	0.240095	Body	0.551887	sox13->chr24:21245544-21246044->boc	Act	1.40426	1.1723	1.55238
nfixa	M05745_2.00	chr24:21245544-21246044	boc	0.268633	Body	0.333532	nfixa->chr24:21245544-21246044->boc	Act	2.03913	1.1723	1.55238
mybl1	M11054_2.00	chr24:21245544-21246044	boc	0.075731	Body	0.181968	mybl1->chr24:21245544-21246044->boc	Act	1.69618	1.1723	1.55238
gli2a	M03902	chr24:21256414-21256914	boc	0.260418	Body	0.716924	gli2a->chr24:21256414-21256914->boc	Act	2.41799	1.1723	0
myb	M07299	chr24:21256414-21256914	boc	0.150326	Body	0.100004	myb->chr24:21256414-21256914->boc	Act	1.14685	1.1723	0
sox2	M08584	chr24:21256414-21256914	boc	0.146872	Body	0.367871	sox2->chr24:21256414-21256914->boc	Act	0.777717	1.1723	0
sox8a	M00197_2.00	chr24:21256414-21256914	boc	0.294131	Body	0.524595	sox8a->chr24:21256414-21256914->boc	Act	1.14831	1.1723	0
sox13	M00197_2.00	chr24:21256414-21256914	boc	0.391172	Body	0.551887	sox13->chr24:21256414-21256914->boc	Act	1.40426	1.1723	0
gli3	M02876_2.00	chr24:21256414-21256914	boc	0.226579	Body	0.521147	gli3->chr24:21256414-21256914->boc	Act	0.96568	1.1723	0
fosl2	M00925	chr24:21256931-21257431	boc	0.522926	Body	0.298069	fosl2->chr24:21256931-21257431->boc	Act	2.31203	1.1723	1.35956
gli3	M01704	chr24:21256931-21257431	boc	0.068013	Body	0.521147	gli3->chr24:21256931-21257431->boc	Act	0.96568	1.1723	1.35956
gli2a	M03902	chr24:21256931-21257431	boc	0.260418	Body	0.716924	gli2a->chr24:21256931-21257431->boc	Act	2.41799	1.1723	1.35956
myb	M07299	chr24:21256931-21257431	boc	0.150326	Body	0.100004	myb->chr24:21256931-21257431->boc	Act	1.14685	1.1723	1.35956
sox2	M08584	chr24:21256931-21257431	boc	0.146872	Body	0.367871	sox2->chr24:21256931-21257431->boc	Act	0.777717	1.1723	1.35956
sox8a	M00197_2.00	chr24:21256931-21257431	boc	0.294131	Body	0.524595	sox8a->chr24:21256931-21257431->boc	Act	1.14831	1.1723	1.35956
sox13	M00197_2.00	chr24:21256931-21257431	boc	0.391172	Body	0.551887	sox13->chr24:21256931-21257431->boc	Act	1.40426	1.1723	1.35956
nfixa	M08164_2.00	chr24:21256931-21257431	boc	0.266833	Body	0.333532	nfixa->chr24:21256931-21257431->boc	Act	2.03913	1.1723	1.35956
tead1a	M09435_2.00	chr24:21256931-21257431	boc	0.312626	Body	0.400738	tead1a->chr24:21256931-21257431->boc	Act	1.61908	1.1723	1.35956
stat3	M01220	chr24:21258483-21258983	boc	0.281591	Body	0.441738	stat3->chr24:21258483-21258983->boc	Act	1.70202	1.1723	0
sox8a	M00212_2.00	chr24:21258483-21258983	boc	0.220012	Body	0.524595	sox8a->chr24:21258483-21258983->boc	Act	1.14831	1.1723	0
sox2	M00212_2.00	chr24:21258483-21258983	boc	0.26266	Body	0.367871	sox2->chr24:21258483-21258983->boc	Act	0.777717	1.1723	0
sox13	M00212_2.00	chr24:21258483-21258983	boc	0.326208	Body	0.551887	sox13->chr24:21258483-21258983->boc	Act	1.40426	1.1723	0
fosl2	M04338_2.00	chr24:21258483-21258983	boc	0.15978	Body	0.298069	fosl2->chr24:21258483-21258983->boc	Act	2.31203	1.1723	0
runx1	M00769	chr24:21012824-21013324	boc	0.224373	Inter	0.25447	runx1->chr24:21012824-21013324->boc	Act	1.51009	1.1723	3.95226
sox2	M07225	chr24:21012824-21013324	boc	0.414659	Inter	0.367871	sox2->chr24:21012824-21013324->boc	Act	0.777717	1.1723	3.95226
sox8a	M01026_2.00	chr24:21012824-21013324	boc	0.365741	Inter	0.524595	sox8a->chr24:21012824-21013324->boc	Act	1.14831	1.1723	3.95226
sox13	M01026_2.00	chr24:21012824-21013324	boc	0.499614	Inter	0.551887	sox13->chr24:21012824-21013324->boc	Act	1.40426	1.1723	3.95226
sox8a	M01014	chr24:21261012-21261512	boc	0.328759	Inter	0.524595	sox8a->chr24:21261012-21261512->boc	Act	1.14831	1.1723	0
sox2	M01014	chr24:21261012-21261512	boc	0.352046	Inter	0.367871	sox2->chr24:21261012-21261512->boc	Act	0.777717	1.1723	0
sox13	M01014	chr24:21261012-21261512	boc	0.447704	Inter	0.551887	sox13->chr24:21261012-21261512->boc	Act	1.40426	1.1723	0
runx1	M08865	chr24:21261012-21261512	boc	0.12471	Inter	0.25447	runx1->chr24:21261012-21261512->boc	Act	1.51009	1.1723	0
fosl2	M08915	chr24:21261012-21261512	boc	0.207604	Inter	0.298069	fosl2->chr24:21261012-21261512->boc	Act	2.31203	1.1723	0
nfixa	M09378_2.00	chr24:21261012-21261512	boc	0.302806	Inter	0.333532	nfixa->chr24:21261012-21261512->boc	Act	2.03913	1.1723	0
runx1	M00271	chr24:21285001-21285501	boc	0.148862	Inter	0.25447	runx1->chr24:21285001-21285501->boc	Act	1.51009	1.1723	0
gli3	M01704	chr24:21285001-21285501	boc	0.068013	Inter	0.521147	gli3->chr24:21285001-21285501->boc	Act	0.96568	1.1723	0
sox2	M02246	chr24:21285001-21285501	boc	0.217687	Inter	0.367871	sox2->chr24:21285001-21285501->boc	Act	0.777717	1.1723	0
gli2a	M02641_2.00	chr24:21285001-21285501	boc	0.0629451	Inter	0.716924	gli2a->chr24:21285001-21285501->boc	Act	2.41799	1.1723	0
sox8a	M08041_2.00	chr24:21285001-21285501	boc	0.280954	Inter	0.524595	sox8a->chr24:21285001-21285501->boc	Act	1.14831	1.1723	0
sox13	M08041_2.00	chr24:21285001-21285501	boc	0.372203	Inter	0.551887	sox13->chr24:21285001-21285501->boc	Act	1.40426	1.1723	0
runx1	M00271	chr24:21285503-21286003	boc	0.148862	Inter	0.25447	runx1->chr24:21285503-21286003->boc	Act	1.51009	1.1723	0
sox2	M02246	chr24:21285503-21286003	boc	0.217687	Inter	0.367871	sox2->chr24:21285503-21286003->boc	Act	0.777717	1.1723	0
sox8a	M08041_2.00	chr24:21285503-21286003	boc	0.280954	Inter	0.524595	sox8a->chr24:21285503-21286003->boc	Act	1.14831	1.1723	0
sox13	M08041_2.00	chr24:21285503-21286003	boc	0.372203	Inter	0.551887	sox13->chr24:21285503-21286003->boc	Act	1.40426	1.1723	0
nfixa	M09378_2.00	chr24:21285503-21286003	boc	0.302806	Inter	0.333532	nfixa->chr24:21285503-21286003->boc	Act	2.03913	1.1723	0
tcf7l1a	M04005	chr19:3055804-3056304	bop1	0.0640349	TSS	0.139106	tcf7l1a->chr19:3055804-3056304->bop1	Act	0.749125	0.95793	0
fosl2	M01809_2.00	chr19:3055804-3056304	bop1	0.0742688	TSS	0.152868	fosl2->chr19:3055804-3056304->bop1	Act	2.31203	0.95793	0
e2f3	M07938_2.00	chr19:3055804-3056304	bop1	0.0784527	TSS	0.129708	e2f3->chr19:3055804-3056304->bop1	Act	0.665166	0.95793	0
tcf7l1a	M00805	chr19:3056403-3056903	bop1	0.191918	TSS	0.139106	tcf7l1a->chr19:3056403-3056903->bop1	Act	0.749125	0.95793	0
mybl1	M04042	chr19:3056403-3056903	bop1	0.0789454	TSS	0.166538	mybl1->chr19:3056403-3056903->bop1	Act	1.69618	0.95793	0
tead3b	M04143	chr19:3056403-3056903	bop1	0.11096	TSS	0.142421	tead3b->chr19:3056403-3056903->bop1	Act	0.518253	0.95793	0
zic2b	M00150_2.00	chr19:3056403-3056903	bop1	0.151564	TSS	0.153474	zic2b->chr19:3056403-3056903->bop1	Act	1.25359	0.95793	0
fosl2	M01809_2.00	chr19:3056403-3056903	bop1	0.0742688	TSS	0.152868	fosl2->chr19:3056403-3056903->bop1	Act	2.31203	0.95793	0
myb	M03349_2.00	chr19:3056403-3056903	bop1	0.0531216	TSS	0.145346	myb->chr19:3056403-3056903->bop1	Act	1.14685	0.95793	0
tead1a	M03575_2.00	chr19:3056403-3056903	bop1	0.193302	TSS	0.124755	tead1a->chr19:3056403-3056903->bop1	Act	1.61908	0.95793	0
e2f3	M07938_2.00	chr19:3056403-3056903	bop1	0.0784527	TSS	0.129708	e2f3->chr19:3056403-3056903->bop1	Act	0.665166	0.95793	0
zic2b	M02893_2.00	chr15:31911052-31911552	brca2	0.185492	TSS	0.204183	zic2b->chr15:31911052-31911552->brca2	Act	1.25359	0.415872	0
zic2b	M00449	chr15:31911658-31912158	brca2	0.11356	TSS	0.204183	zic2b->chr15:31911658-31912158->brca2	Act	1.25359	0.415872	0
junbb	M08921	chr15:31911658-31912158	brca2	0.184471	TSS	0.130606	junbb->chr15:31911658-31912158->brca2	Act	0.837658	0.415872	0
fosl2	M08941	chr15:31911658-31912158	brca2	0.260036	TSS	0.168403	fosl2->chr15:31911658-31912158->brca2	Act	2.31203	0.415872	0
junbb	M08921	chr15:31912233-31912733	brca2	0.184471	TSS	0.130606	junbb->chr15:31912233-31912733->brca2	Act	0.837658	0.415872	0
fosl2	M08941	chr15:31912233-31912733	brca2	0.260036	TSS	0.168403	fosl2->chr15:31912233-31912733->brca2	Act	2.31203	0.415872	0
stat3	M00225	chr19:7156419-7156919	brd2a	0.283617	Body	0.0912644	stat3->chr19:7156419-7156919->brd2a	Act	1.70202	0.676909	0
tcf7l1a	M00805	chr19:7156419-7156919	brd2a	0.191918	Body	0.192223	tcf7l1a->chr19:7156419-7156919->brd2a	Act	0.749125	0.676909	0
fosl2	M00926	chr19:7156419-7156919	brd2a	0.528779	Body	0.216865	fosl2->chr19:7156419-7156919->brd2a	Act	2.31203	0.676909	0
e2f3	M02089	chr19:7156419-7156919	brd2a	0.0769846	Body	0.152194	e2f3->chr19:7156419-7156919->brd2a	Act	0.665166	0.676909	0
foxj1a	M03056_2.00	chr19:7156419-7156919	brd2a	0.08012	Body	0.142106	foxj1a->chr19:7156419-7156919->brd2a	Act	0.670268	0.676909	0
tead1a	M08175_2.00	chr19:7156419-7156919	brd2a	0.417358	Body	0.202383	tead1a->chr19:7156419-7156919->brd2a	Act	1.61908	0.676909	0
ascl1a	M08730_2.00	chr19:7156419-7156919	brd2a	0.0853244	Body	0.197107	ascl1a->chr19:7156419-7156919->brd2a	Act	0.683363	0.676909	0
tcf3b	M09794_2.00	chr19:7156419-7156919	brd2a	0.146783	Body	0.0885412	tcf3b->chr19:7156419-7156919->brd2a	Act	0.685194	0.676909	0
tcf7l1a	M00805	chr19:7156924-7157424	brd2a	0.191918	Body	0.192223	tcf7l1a->chr19:7156924-7157424->brd2a	Act	0.749125	0.676909	0
fosl2	M00926	chr19:7156924-7157424	brd2a	0.528779	Body	0.216865	fosl2->chr19:7156924-7157424->brd2a	Act	2.31203	0.676909	0
e2f3	M02089	chr19:7156924-7157424	brd2a	0.0769846	Body	0.152194	e2f3->chr19:7156924-7157424->brd2a	Act	0.665166	0.676909	0
foxj1a	M03056_2.00	chr19:7156924-7157424	brd2a	0.08012	Body	0.142106	foxj1a->chr19:7156924-7157424->brd2a	Act	0.670268	0.676909	0
tead1a	M03579_2.00	chr19:7156924-7157424	brd2a	0.369686	Body	0.202383	tead1a->chr19:7156924-7157424->brd2a	Act	1.61908	0.676909	0
zic2b	M04566_2.00	chr19:7156924-7157424	brd2a	0.227969	Body	0.180223	zic2b->chr19:7156924-7157424->brd2a	Act	1.25359	0.676909	0
ascl1a	M08730_2.00	chr19:7156924-7157424	brd2a	0.0853244	Body	0.197107	ascl1a->chr19:7156924-7157424->brd2a	Act	0.683363	0.676909	0
tcf3b	M09794_2.00	chr19:7156924-7157424	brd2a	0.146783	Body	0.0885412	tcf3b->chr19:7156924-7157424->brd2a	Act	0.685194	0.676909	0
mybl1	M04042	chr19:7153043-7153543	brd2a	0.0789454	TSS	0.212656	mybl1->chr19:7153043-7153543->brd2a	Act	1.69618	0.676909	0
e2f3	M10210	chr19:7153043-7153543	brd2a	0.198718	TSS	0.152194	e2f3->chr19:7153043-7153543->brd2a	Act	0.665166	0.676909	0
myb	M03349_2.00	chr19:7153043-7153543	brd2a	0.0531216	TSS	0.165128	myb->chr19:7153043-7153543->brd2a	Act	1.14685	0.676909	0
stat3	M08015_2.00	chr19:7153043-7153543	brd2a	0.179851	TSS	0.0912644	stat3->chr19:7153043-7153543->brd2a	Act	1.70202	0.676909	0
erfl3	M09061_2.00	chr19:7153043-7153543	brd2a	0.224653	TSS	0.146923	erfl3->chr19:7153043-7153543->brd2a	Act	1.01761	0.676909	0
e2f3	M00153_2.00	chr19:7153860-7154360	brd2a	0.1011	TSS	0.152194	e2f3->chr19:7153860-7154360->brd2a	Act	0.665166	0.676909	0
ascl1a	M02814_2.00	chr19:7154651-7155151	brd2a	0.0744385	TSS	0.197107	ascl1a->chr19:7154651-7155151->brd2a	Act	0.683363	0.676909	0
erfl3	M07948_2.00	chr19:7154651-7155151	brd2a	0.0739714	TSS	0.146923	erfl3->chr19:7154651-7155151->brd2a	Act	1.01761	0.676909	0
olig2	M09703	chr3:53156496-53156996	brd4	0.0616604	Body	0.173879	olig2->chr3:53156496-53156996->brd4	Act	1.16665	0.525571	0
olig2	M09703	chr3:53157003-53157503	brd4	0.0616604	Body	0.173879	olig2->chr3:53157003-53157503->brd4	Act	1.16665	0.525571	0
rfx2	M02452_2.00	chr3:53157003-53157503	brd4	0.0810891	Body	0.171845	rfx2->chr3:53157003-53157503->brd4	Act	1.13253	0.525571	0
myb	M00913	chr3:53171308-53171808	brd4	0.191004	Body	0.171091	myb->chr3:53171308-53171808->brd4	Act	1.14685	0.525571	3.07651
fosl2	M00924	chr3:53171308-53171808	brd4	0.534263	Body	0.224954	fosl2->chr3:53171308-53171808->brd4	Act	2.31203	0.525571	3.07651
mybl1	M02884	chr3:53171308-53171808	brd4	0.211325	Body	0.220789	mybl1->chr3:53171308-53171808->brd4	Act	1.69618	0.525571	3.07651
ascl1a	M09767	chr3:53171308-53171808	brd4	0.0649742	Body	0.171672	ascl1a->chr3:53171308-53171808->brd4	Act	0.683363	0.525571	3.07651
tcf3b	M07805_2.00	chr3:53171308-53171808	brd4	0.142286	Body	0.0859569	tcf3b->chr3:53171308-53171808->brd4	Act	0.685194	0.525571	3.07651
fosl2	M00926	chr3:53175320-53175820	brd4	0.528779	Body	0.224954	fosl2->chr3:53175320-53175820->brd4	Act	2.31203	0.525571	4.81388
zic2b	M02893_2.00	chr3:53175320-53175820	brd4	0.185492	Body	0.185496	zic2b->chr3:53175320-53175820->brd4	Act	1.25359	0.525571	4.81388
zic2b	M02893_2.00	chr3:53175837-53176337	brd4	0.185492	Body	0.185496	zic2b->chr3:53175837-53176337->brd4	Act	1.25359	0.525571	2.37964
runx1	M09631_2.00	chr3:53175837-53176337	brd4	0.200077	Body	0.190266	runx1->chr3:53175837-53176337->brd4	Act	1.51009	0.525571	2.37964
runx1	M09631_2.00	chr3:52898208-52898708	brd4	0.200077	Inter	0.190266	runx1->chr3:52898208-52898708->brd4	Act	1.51009	0.525571	0
runx1	M00271	chr3:53115721-53116221	brd4	0.148862	TSS	0.190266	runx1->chr3:53115721-53116221->brd4	Act	1.51009	0.525571	0
foxj3	M02855	chr3:53115721-53116221	brd4	0.0612577	TSS	0.106325	foxj3->chr3:53115721-53116221->brd4	Act	0.808686	0.525571	0
foxj3	M02855	chr3:53116373-53116873	brd4	0.0612577	TSS	0.106325	foxj3->chr3:53116373-53116873->brd4	Act	0.808686	0.525571	0
runx1	M05731_2.00	chr3:53116373-53116873	brd4	0.0956079	TSS	0.190266	runx1->chr3:53116373-53116873->brd4	Act	1.51009	0.525571	0
tcf7l1a	M00712_2.00	chr3:53155931-53156431	brd4	0.281625	TSS	0.192635	tcf7l1a->chr3:53155931-53156431->brd4	Act	0.749125	0.525571	0
runx1	M09370_2.00	chr3:53155931-53156431	brd4	0.235119	TSS	0.190266	runx1->chr3:53155931-53156431->brd4	Act	1.51009	0.525571	0
foxj3	M02855	chr13:33368217-33368717	brf1a	0.0612577	Body	0.0656945	foxj3->chr13:33368217-33368717->brf1a	Act	0.808686	0.664242	0
sox13	M05769_2.00	chr13:33368217-33368717	brf1a	0.315793	Body	0.0438727	sox13->chr13:33368217-33368717->brf1a	Act	1.40426	0.664242	0
sox13	M05769_2.00	chr13:33368769-33369269	brf1a	0.315793	Body	0.0438727	sox13->chr13:33368769-33369269->brf1a	Act	1.40426	0.664242	0
foxj3	M02855	chr13:33367686-33368186	brf1a	0.0612577	TSS	0.0656945	foxj3->chr13:33367686-33368186->brf1a	Act	0.808686	0.664242	0
sox13	M08041_2.00	chr13:33367686-33368186	brf1a	0.372203	TSS	0.0438727	sox13->chr13:33367686-33368186->brf1a	Act	1.40426	0.664242	0
tcf7l1a	M00805	chr20:20901521-20902021	brf1b	0.191918	Body	0.196601	tcf7l1a->chr20:20901521-20902021->brf1b	Act	0.749125	0.703929	0
[truncated: 21,209 more rows]

## Sheet: tab3
TF	Motif	Peak	Target	TF_Motif_Cor	PtoG_Class	GG_Corr	Triple	type	TF_fold	Target_fold	Peak_fold
gli1	M04417_2.00	chr6:59916792-59917292	aamp	0.0950776	Body	0.0842919	gli1->chr6:59916792-59917292->aamp	Act	1.0507	0.514444	0
gli1	M03871	chr6:59902142-59902642	aamp	0.0839124	Inter	0.0842919	gli1->chr6:59902142-59902642->aamp	Act	1.0507	0.514444	0
rx1	M00309_2.00	chr6:60151378-60151878	aamp	0.122191	Inter	0.0805829	rx1->chr6:60151378-60151878->aamp	Act	0.447176	0.514444	1.57548
foxp4	M03753_2.00	chr6:60151378-60151878	aamp	0.101577	Inter	0.0940249	foxp4->chr6:60151378-60151878->aamp	Act	1.82548	0.514444	1.57548
tcf7l1b	M09392_2.00	chr6:59913310-59913810	aamp	0.219956	TSS	0.105376	tcf7l1b->chr6:59913310-59913810->aamp	Act	0.581799	0.514444	0
rx1	M05065_2.00	chr6:59913828-59914328	aamp	0.081488	TSS	0.0805829	rx1->chr6:59913828-59914328->aamp	Act	0.447176	0.514444	0
gli1	M08023_2.00	chr6:59913828-59914328	aamp	0.0568525	TSS	0.0842919	gli1->chr6:59913828-59914328->aamp	Act	1.0507	0.514444	0
tcf7l1b	M09392_2.00	chr6:59913828-59914328	aamp	0.219956	TSS	0.105376	tcf7l1b->chr6:59913828-59914328->aamp	Act	0.581799	0.514444	0
rx1	M03104_2.00	chr5:56169483-56169983	aatf	0.051528	Inter	0.103589	rx1->chr5:56169483-56169983->aatf	Act	0.447176	0.589171	0
pax2a	M09622_2.00	chr5:56169483-56169983	aatf	0.0867587	Inter	0.0941518	pax2a->chr5:56169483-56169983->aatf	Act	1.36554	0.589171	0
rx1	M06482_2.00	chr5:56494834-56495334	aatf	0.174569	Inter	0.103589	rx1->chr5:56494834-56495334->aatf	Act	0.447176	0.589171	2.07507
gli1	M02732_2.00	chr5:56505695-56506195	aatf	0.107258	Inter	0.123475	gli1->chr5:56505695-56506195->aatf	Act	1.0507	0.589171	0
gli2b	M02732_2.00	chr5:56505695-56506195	aatf	0.060362	Inter	0.105682	gli2b->chr5:56505695-56506195->aatf	Act	0.548577	0.589171	0
rx1	M03128_2.00	chr5:56505695-56506195	aatf	0.176841	Inter	0.103589	rx1->chr5:56505695-56506195->aatf	Act	0.447176	0.589171	0
foxp4	M06202_2.00	chr5:56505695-56506195	aatf	0.195278	Inter	0.134578	foxp4->chr5:56505695-56506195->aatf	Act	1.82548	0.589171	0
smad1	M01590	chr5:56277622-56278122	aatf	0.118984	TSS	0.139244	smad1->chr5:56277622-56278122->aatf	Act	1.01155	0.589171	0
hmga1a	M01676_2.00	chr2:32512619-32513119	abcf2a	0.0945597	Body	0.0577619	hmga1a->chr2:32512619-32513119->abcf2a	Act	1.97383	0.313115	0
hmga1a	M01676_2.00	chr2:32513268-32513768	abcf2a	0.0945597	TSS	0.0577619	hmga1a->chr2:32513268-32513768->abcf2a	Act	1.97383	0.313115	0
hmga1a	M01674_2.00	chr11:41921441-41921941	abhd6a	0.116991	Inter	0.0890901	hmga1a->chr11:41921441-41921941->abhd6a	Act	1.97383	0.469444	0
hmga1a	M01671_2.00	chr11:41980428-41980928	abhd6a	0.076207	Inter	0.0890901	hmga1a->chr11:41980428-41980928->abhd6a	Act	1.97383	0.469444	0
sox3	M05789_2.00	chr11:41980428-41980928	abhd6a	0.165595	Inter	0.0930059	sox3->chr11:41980428-41980928->abhd6a	Act	1.41389	0.469444	0
sox3	M11340_2.00	chr11:41986451-41986951	abhd6a	0.154399	Inter	0.0930059	sox3->chr11:41986451-41986951->abhd6a	Act	1.41389	0.469444	1.13131
sox3	M01014	chr11:42099192-42099692	abhd6a	0.180849	TSS	0.0930059	sox3->chr11:42099192-42099692->abhd6a	Act	1.41389	0.469444	0
foxp4	M04813_2.00	chr12:49145693-49146193	acadsb	0.101624	Inter	0.0591789	foxp4->chr12:49145693-49146193->acadsb	Act	1.82548	0.352	0
tcf7l1b	M04005	chr2:38205366-38205866	acin1a	0.129554	TSS	0.0836494	tcf7l1b->chr2:38205366-38205866->acin1a	Act	0.581799	0.591787	0
hmga1a	M01653	chr2:38206030-38206530	acin1a	0.128595	TSS	0.0791551	hmga1a->chr2:38206030-38206530->acin1a	Act	1.97383	0.591787	0
tcf7l1b	M04005	chr2:38206030-38206530	acin1a	0.129554	TSS	0.0836494	tcf7l1b->chr2:38206030-38206530->acin1a	Act	0.581799	0.591787	0
tcf7l1b	M04005	chr2:38224449-38224949	acin1a	0.129554	TSS	0.0836494	tcf7l1b->chr2:38224449-38224949->acin1a	Act	0.581799	0.591787	0
foxp4	M01976_2.00	chr2:38224449-38224949	acin1a	0.0540947	TSS	0.101035	foxp4->chr2:38224449-38224949->acin1a	Act	1.82548	0.591787	0
gli1	M01042	chr2:38225129-38225629	acin1a	0.0904529	TSS	0.0757213	gli1->chr2:38225129-38225629->acin1a	Act	1.0507	0.591787	0
gli1	M01037	chr2:38225714-38226214	acin1a	0.0774041	TSS	0.0757213	gli1->chr2:38225714-38226214->acin1a	Act	1.0507	0.591787	1.69105
hmga1a	M01674_2.00	chr2:38225714-38226214	acin1a	0.116991	TSS	0.0791551	hmga1a->chr2:38225714-38226214->acin1a	Act	1.97383	0.591787	1.69105
sox3	M01014	chr1:17584644-17585144	acsl1a	0.180849	Body	0.086526	sox3->chr1:17584644-17585144->acsl1a	Act	1.41389	0.590169	1.44792
hmga1a	M01676_2.00	chr1:17587331-17587831	acsl1a	0.0945597	Body	0.0851485	hmga1a->chr1:17587331-17587831->acsl1a	Act	1.97383	0.590169	0.854625
hmga1a	M00750	chr1:17590083-17590583	acsl1a	0.0926791	Inter	0.0851485	hmga1a->chr1:17590083-17590583->acsl1a	Act	1.97383	0.590169	0
sox3	M00202_2.00	chr1:17590083-17590583	acsl1a	0.133142	Inter	0.086526	sox3->chr1:17590083-17590583->acsl1a	Act	1.41389	0.590169	0
tcf7l1b	M00712_2.00	chr1:17590083-17590583	acsl1a	0.213137	Inter	0.110722	tcf7l1b->chr1:17590083-17590583->acsl1a	Act	0.581799	0.590169	0
foxp4	M03013_2.00	chr1:17590083-17590583	acsl1a	0.0547288	Inter	0.0789065	foxp4->chr1:17590083-17590583->acsl1a	Act	1.82548	0.590169	0
hmga1a	M01674_2.00	chr1:17586732-17587232	acsl1a	0.116991	TSS	0.0851485	hmga1a->chr1:17586732-17587232->acsl1a	Act	1.97383	0.590169	0
pax2a	M00345_2.00	chr8:50863171-50863671	acsl2	0.0601853	Body	0.148076	pax2a->chr8:50863171-50863671->acsl2	Act	1.36554	0.319717	0
vdrb	M05629_2.00	chr8:50875716-50876216	acsl2	0.106354	Body	0.0872827	vdrb->chr8:50875716-50876216->acsl2	Act	0.748488	0.319717	0
gli2b	M03902	chr8:50653958-50654458	acsl2	0.0759209	Inter	0.129324	gli2b->chr8:50653958-50654458->acsl2	Act	0.548577	0.319717	0
gli1	M02876_2.00	chr8:50653958-50654458	acsl2	0.124253	Inter	0.180562	gli1->chr8:50653958-50654458->acsl2	Act	1.0507	0.319717	0
rx1	M05165_2.00	chr8:50783360-50783860	acsl2	0.0961595	Inter	0.172233	rx1->chr8:50783360-50783860->acsl2	Act	0.447176	0.319717	2.51907
vax2	M05165_2.00	chr8:50783360-50783860	acsl2	0.103014	Inter	0.119163	vax2->chr8:50783360-50783860->acsl2	Act	1.95011	0.319717	2.51907
foxp4	M03021_2.00	chr17:25833563-25834063	acss1	0.177465	Body	0.201442	foxp4->chr17:25833563-25834063->acss1	Act	1.82548	0.666959	0
foxp4	M00160_2.00	chr17:25834093-25834593	acss1	0.0765115	Body	0.201442	foxp4->chr17:25834093-25834593->acss1	Act	1.82548	0.666959	0
foxp4	M09083_2.00	chr11:19157635-19158135	adamts9	0.117639	Body	0.179265	foxp4->chr11:19157635-19158135->adamts9	Act	1.82548	0.850613	0
rarab	M06427_2.00	chr11:19404793-19405293	adamts9	0.0631066	Inter	0.071157	rarab->chr11:19404793-19405293->adamts9	Act	0.525974	0.850613	3.30687
foxp4	M03753_2.00	chr20:37760247-37760747	adat2	0.101577	Body	0.136402	foxp4->chr20:37760247-37760747->adat2	Act	1.82548	0.355293	0
pax2a	M09341_2.00	chr20:37760247-37760747	adat2	0.107404	Body	0.134022	pax2a->chr20:37760247-37760747->adat2	Act	1.36554	0.355293	0
rx1	M03181_2.00	chr20:37609729-37610229	adat2	0.0639697	Inter	0.0940905	rx1->chr20:37609729-37610229->adat2	Act	0.447176	0.355293	2.19349
rx1	M03823_2.00	chr20:37625592-37626092	adat2	0.183528	Inter	0.0940905	rx1->chr20:37625592-37626092->adat2	Act	0.447176	0.355293	4.66802
gli1	M01037	chr7:28694333-28694833	adgrg1	0.0774041	Body	0.15374	gli1->chr7:28694333-28694833->adgrg1	Act	1.0507	0.339775	1.04531
pax2a	M00345_2.00	chr7:28694333-28694833	adgrg1	0.0601853	Body	0.131495	pax2a->chr7:28694333-28694833->adgrg1	Act	1.36554	0.339775	1.04531
gli1	M01037	chr7:28694849-28695349	adgrg1	0.0774041	Body	0.15374	gli1->chr7:28694849-28695349->adgrg1	Act	1.0507	0.339775	0
tcf7l1b	M00712_2.00	chr7:28694849-28695349	adgrg1	0.213137	Body	0.130142	tcf7l1b->chr7:28694849-28695349->adgrg1	Act	0.581799	0.339775	0
pax2a	M03442_2.00	chr7:28696369-28696869	adgrg1	0.0890592	Body	0.131495	pax2a->chr7:28696369-28696869->adgrg1	Act	1.36554	0.339775	0
foxp4	M00792_2.00	chr7:28657955-28658455	adgrg1	0.0540947	TSS	0.144651	foxp4->chr7:28657955-28658455->adgrg1	Act	1.82548	0.339775	0
foxp4	M03056_2.00	chr7:28695689-28696189	adgrg1	0.138951	TSS	0.144651	foxp4->chr7:28695689-28696189->adgrg1	Act	1.82548	0.339775	0
foxp4	M03021_2.00	chr17:51223542-51224042	adi1	0.177465	TSS	0.0757884	foxp4->chr17:51223542-51224042->adi1	Act	1.82548	0.512392	0
tcf7l1b	M09386_2.00	chr17:51223542-51224042	adi1	0.088885	TSS	0.0753547	tcf7l1b->chr17:51223542-51224042->adi1	Act	0.581799	0.512392	0
gli1	M07454	chr17:51224172-51224672	adi1	0.0909543	TSS	0.06753	gli1->chr17:51224172-51224672->adi1	Act	1.0507	0.512392	0
rx1	M06276_2.00	chr21:26522341-26522841	adssl	0.071885	Body	0.0725581	rx1->chr21:26522341-26522841->adssl	Act	0.447176	0.364812	0
foxp4	M01976_2.00	chr21:26394083-26394583	adssl	0.0540947	Inter	0.142352	foxp4->chr21:26394083-26394583->adssl	Act	1.82548	0.364812	0
foxp4	M04814_2.00	chr21:26669763-26670263	adssl	0.158053	Inter	0.142352	foxp4->chr21:26669763-26670263->adssl	Act	1.82548	0.364812	1.24998
pax2a	M08228_2.00	chr21:26669763-26670263	adssl	0.0649438	Inter	0.0781395	pax2a->chr21:26669763-26670263->adssl	Act	1.36554	0.364812	1.24998
rx1	M00265_2.00	chr21:26708407-26708907	adssl	0.102619	Inter	0.0725581	rx1->chr21:26708407-26708907->adssl	Act	0.447176	0.364812	0.662637
foxp4	M00793_2.00	chr10:2794348-2794848	aebp1	0.0604656	Inter	0.143587	foxp4->chr10:2794348-2794848->aebp1	Act	1.82548	0.547008	1.60445
gli1	M01023_2.00	chr10:2794348-2794848	aebp1	0.121936	Inter	0.116429	gli1->chr10:2794348-2794848->aebp1	Act	1.0507	0.547008	1.60445
vax2	M10714_2.00	chr10:2794348-2794848	aebp1	0.0639022	Inter	0.105909	vax2->chr10:2794348-2794848->aebp1	Act	1.95011	0.547008	1.60445
rx1	M00288_2.00	chr16:45799313-45799813	afp4	0.0644793	Inter	0.144311	rx1->chr16:45799313-45799813->afp4	Act	0.447176	0.691988	0
vax2	M00288_2.00	chr16:45799313-45799813	afp4	0.0699723	Inter	0.0955705	vax2->chr16:45799313-45799813->afp4	Act	1.95011	0.691988	0
foxp4	M04813_2.00	chr19:47816607-47817107	ago4	0.101624	Body	0.0685502	foxp4->chr19:47816607-47817107->ago4	Act	1.82548	0.527238	0
ctcf	M08995	chr19:47832667-47833167	ago4	0.0712505	Body	0.0505002	ctcf->chr19:47832667-47833167->ago4	Act	0.389922	0.527238	0.646203
hmga1a	M02652_2.00	chr19:47832667-47833167	ago4	0.167321	Body	0.0966279	hmga1a->chr19:47832667-47833167->ago4	Act	1.97383	0.527238	0.646203
sox3	M03973_2.00	chr19:47832667-47833167	ago4	0.0775414	Body	0.0559762	sox3->chr19:47832667-47833167->ago4	Act	1.41389	0.527238	0.646203
foxp4	M00160_2.00	chr19:47831994-47832494	ago4	0.0765115	TSS	0.0685502	foxp4->chr19:47831994-47832494->ago4	Act	1.82548	0.527238	0
hmga1a	M01689_2.00	chr19:47831994-47832494	ago4	0.158951	TSS	0.0966279	hmga1a->chr19:47831994-47832494->ago4	Act	1.97383	0.527238	0
sox3	M05897_2.00	chr19:47831994-47832494	ago4	0.244552	TSS	0.0559762	sox3->chr19:47831994-47832494->ago4	Act	1.41389	0.527238	0
rxrba	M09833	chr17:12249719-12250219	ahctf1	0.0812594	TSS	0.0672232	rxrba->chr17:12249719-12250219->ahctf1	Act	0.312547	0.502877	0
foxp4	M03056_2.00	chr17:12249719-12250219	ahctf1	0.138951	TSS	0.136965	foxp4->chr17:12249719-12250219->ahctf1	Act	1.82548	0.502877	0
pax2a	M03442_2.00	chr17:12249719-12250219	ahctf1	0.0890592	TSS	0.0840559	pax2a->chr17:12249719-12250219->ahctf1	Act	1.36554	0.502877	0
vax2	M03233_2.00	chr6:49925799-49926299	ahcy	0.083784	Body	0.0452097	vax2->chr6:49925799-49926299->ahcy	Act	1.95011	0.625517	0
vax2	M03233_2.00	chr6:49926526-49927026	ahcy	0.083784	TSS	0.0452097	vax2->chr6:49926526-49927026->ahcy	Act	1.95011	0.625517	0
tcf7l1b	M08428_2.00	chr19:35259228-35259728	ak2	0.131041	Inter	0.078437	tcf7l1b->chr19:35259228-35259728->ak2	Act	0.581799	0.916079	2.65413
gli1	M07292	chr20:45930297-45930797	AL929237.3	0.105727	Inter	0.146792	gli1->chr20:45930297-45930797->AL929237.3	Act	1.0507	0.532541	3.97899
rx1	M06276_2.00	chr20:45930297-45930797	AL929237.3	0.071885	Inter	0.11923	rx1->chr20:45930297-45930797->AL929237.3	Act	0.447176	0.532541	3.97899
pax2a	M09624_2.00	chr20:45930297-45930797	AL929237.3	0.0533407	Inter	0.137691	pax2a->chr20:45930297-45930797->AL929237.3	Act	1.36554	0.532541	3.97899
gli1	M03871	chr20:45935666-45936166	AL929237.3	0.0839124	Inter	0.146792	gli1->chr20:45935666-45936166->AL929237.3	Act	1.0507	0.532541	2.24677
rx1	M03159_2.00	chr20:45935666-45936166	AL929237.3	0.0612714	Inter	0.11923	rx1->chr20:45935666-45936166->AL929237.3	Act	0.447176	0.532541	2.24677
foxp4	M06203_2.00	chr20:45935666-45936166	AL929237.3	0.172102	Inter	0.16943	foxp4->chr20:45935666-45936166->AL929237.3	Act	1.82548	0.532541	2.24677
rx1	M05165_2.00	chr20:45983130-45983630	AL929237.3	0.0961595	Inter	0.11923	rx1->chr20:45983130-45983630->AL929237.3	Act	0.447176	0.532541	0
foxp4	M09083_2.00	chr20:45983130-45983630	AL929237.3	0.117639	Inter	0.16943	foxp4->chr20:45983130-45983630->AL929237.3	Act	1.82548	0.532541	0
pax2a	M09624_2.00	chr20:45983130-45983630	AL929237.3	0.0533407	Inter	0.137691	pax2a->chr20:45983130-45983630->AL929237.3	Act	1.36554	0.532541	0
tcf7l1b	M09638_2.00	chr20:45983130-45983630	AL929237.3	0.085538	Inter	0.147719	tcf7l1b->chr20:45983130-45983630->AL929237.3	Act	0.581799	0.532541	0
vsx2	M10411	chr4:77546579-77547079	AL935186.10	0.12696	Inter	0.0917068	vsx2->chr4:77546579-77547079->AL935186.10	Act	0.386502	2.22575	2.44236
rx1	M02166_2.00	chr4:77546579-77547079	AL935186.10	0.113249	Inter	0.0964372	rx1->chr4:77546579-77547079->AL935186.10	Act	0.447176	2.22575	2.44236
gli1	M07292	chr4:77558358-77558858	AL935186.10	0.105727	Inter	0.151176	gli1->chr4:77558358-77558858->AL935186.10	Act	1.0507	2.22575	0
foxp4	M04814_2.00	chr4:77558999-77559499	AL935186.10	0.158053	Inter	0.194091	foxp4->chr4:77558999-77559499->AL935186.10	Act	1.82548	2.22575	1.08457
gli1	M03871	chr4:77559510-77560010	AL935186.10	0.0839124	Inter	0.151176	gli1->chr4:77559510-77560010->AL935186.10	Act	1.0507	2.22575	0.936941
foxp4	M04814_2.00	chr4:77559510-77560010	AL935186.10	0.158053	Inter	0.194091	foxp4->chr4:77559510-77560010->AL935186.10	Act	1.82548	2.22575	0.936941
pax2a	M07995_2.00	chr4:77559510-77560010	AL935186.10	0.103307	Inter	0.128983	pax2a->chr4:77559510-77560010->AL935186.10	Act	1.36554	2.22575	0.936941
gli1	M01037	chr4:77560076-77560576	AL935186.10	0.0774041	Inter	0.151176	gli1->chr4:77560076-77560576->AL935186.10	Act	1.0507	2.22575	1.07097
hmga1a	M00750	chr4:77560821-77561321	AL935186.10	0.0926791	TSS	0.0777789	hmga1a->chr4:77560821-77561321->AL935186.10	Act	1.97383	2.22575	1.17639
gli1	M01702	chr4:77560821-77561321	AL935186.10	0.12812	TSS	0.151176	gli1->chr4:77560821-77561321->AL935186.10	Act	1.0507	2.22575	1.17639
pax2a	M00346_2.00	chr4:77560821-77561321	AL935186.10	0.0743167	TSS	0.128983	pax2a->chr4:77560821-77561321->AL935186.10	Act	1.36554	2.22575	1.17639
foxp4	M03021_2.00	chr4:77560821-77561321	AL935186.10	0.177465	TSS	0.194091	foxp4->chr4:77560821-77561321->AL935186.10	Act	1.82548	2.22575	1.17639
gli1	M03871	chr7:30315894-30316394	aldh1a2	0.0839124	Inter	0.0787199	gli1->chr7:30315894-30316394->aldh1a2	Act	1.0507	0.893808	3.19587
rx1	M05241_2.00	chr7:30315894-30316394	aldh1a2	0.139945	Inter	0.101629	rx1->chr7:30315894-30316394->aldh1a2	Act	0.447176	0.893808	3.19587
tcf7l1b	M09392_2.00	chr7:30315894-30316394	aldh1a2	0.219956	Inter	0.120465	tcf7l1b->chr7:30315894-30316394->aldh1a2	Act	0.581799	0.893808	3.19587
pax2a	M04061	chr7:9781512-9782012	aldh1a3	0.116157	Body	0.377407	pax2a->chr7:9781512-9782012->aldh1a3	Act	1.36554	1.06377	2.30132
foxp4	M00258_2.00	chr7:9781512-9782012	aldh1a3	0.148869	Body	0.293921	foxp4->chr7:9781512-9782012->aldh1a3	Act	1.82548	1.06377	2.30132
vax2	M00286_2.00	chr7:9971233-9971733	aldh1a3	0.0599043	Inter	0.322957	vax2->chr7:9971233-9971733->aldh1a3	Act	1.95011	1.06377	0
pax2a	M00345_2.00	chr7:9971978-9972478	aldh1a3	0.0601853	Inter	0.377407	pax2a->chr7:9971978-9972478->aldh1a3	Act	1.36554	1.06377	0
vax2	M00286_2.00	chr7:9803268-9803768	aldh1a3	0.0599043	TSS	0.322957	vax2->chr7:9803268-9803768->aldh1a3	Act	1.95011	1.06377	1.38832
tcf7l1b	M09400_2.00	chr10:16027773-16028273	aldh7a1	0.195293	Body	0.0695276	tcf7l1b->chr10:16027773-16028273->aldh7a1	Act	0.581799	0.393187	0
foxp4	M03021_2.00	chr10:15788342-15788842	aldh7a1	0.177465	Inter	0.0682386	foxp4->chr10:15788342-15788842->aldh7a1	Act	1.82548	0.393187	1.95685
foxp4	M03021_2.00	chr10:15788844-15789344	aldh7a1	0.177465	Inter	0.0682386	foxp4->chr10:15788844-15789344->aldh7a1	Act	1.82548	0.393187	1.3882
gli1	M02876_2.00	chr3:39567977-39568477	aldoaa	0.124253	TSS	0.0710465	gli1->chr3:39567977-39568477->aldoaa	Act	1.0507	1.13801	0
rx1	M09583_2.00	chr3:39568588-39569088	aldoaa	0.080195	TSS	0.0705601	rx1->chr3:39568588-39569088->aldoaa	Act	0.447176	1.13801	0
gli1	M03871	chr14:21106239-21106739	aldob	0.0839124	Body	0.106726	gli1->chr14:21106239-21106739->aldob	Act	1.0507	0.720963	1.66877
foxp4	M03051_2.00	chr14:21106239-21106739	aldob	0.165253	Body	0.112114	foxp4->chr14:21106239-21106739->aldob	Act	1.82548	0.720963	1.66877
foxp4	M03051_2.00	chr14:21105706-21106206	aldob	0.165253	TSS	0.112114	foxp4->chr14:21105706-21106206->aldob	Act	1.82548	0.720963	0
sox3	M02718_2.00	chr3:59982582-59983082	alyref	0.152511	Inter	0.0398686	sox3->chr3:59982582-59983082->alyref	Act	1.41389	0.722854	0
foxp4	M03019_2.00	chr3:59982582-59983082	alyref	0.105495	Inter	0.0404975	foxp4->chr3:59982582-59983082->alyref	Act	1.82548	0.722854	0
foxp4	M03055_2.00	chr3:59879342-59879842	alyref	0.0611115	TSS	0.0404975	foxp4->chr3:59879342-59879842->alyref	Act	1.82548	0.722854	0
sox3	M03488_2.00	chr3:59879342-59879842	alyref	0.0795183	TSS	0.0398686	sox3->chr3:59879342-59879842->alyref	Act	1.41389	0.722854	0
sox3	M01026_2.00	chr3:59879960-59880460	alyref	0.207573	TSS	0.0398686	sox3->chr3:59879960-59880460->alyref	Act	1.41389	0.722854	0
hmga1a	M01105_2.00	chr3:59879960-59880460	alyref	0.085588	TSS	0.0763323	hmga1a->chr3:59879960-59880460->alyref	Act	1.97383	0.722854	0
foxp4	M06202_2.00	chr3:59879960-59880460	alyref	0.195278	TSS	0.0404975	foxp4->chr3:59879960-59880460->alyref	Act	1.82548	0.722854	0
sox3	M01014	chr3:59880590-59881090	alyref	0.180849	TSS	0.0398686	sox3->chr3:59880590-59881090->alyref	Act	1.41389	0.722854	0.709606
hmga1a	M02652_2.00	chr3:59880590-59881090	alyref	0.167321	TSS	0.0763323	hmga1a->chr3:59880590-59881090->alyref	Act	1.97383	0.722854	0.709606
ctcf	M07551_2.00	chr3:59880590-59881090	alyref	0.0669092	TSS	0.0360745	ctcf->chr3:59880590-59881090->alyref	Act	0.389922	0.722854	0.709606
rarab	M02404_2.00	chr20:2932601-2933101	amd1	0.0566025	Inter	0.0355078	rarab->chr20:2932601-2933101->amd1	Act	0.525974	0.424269	0
gli1	M08023_2.00	chr20:2949672-2950172	amd1	0.0568525	TSS	0.0729037	gli1->chr20:2949672-2950172->amd1	Act	1.0507	0.424269	0.595163
tcf7l1b	M08428_2.00	chr20:2949672-2950172	amd1	0.131041	TSS	0.0739924	tcf7l1b->chr20:2949672-2950172->amd1	Act	0.581799	0.424269	0.595163
foxp4	M03051_2.00	chr20:2950265-2950765	amd1	0.165253	TSS	0.0909938	foxp4->chr20:2950265-2950765->amd1	Act	1.82548	0.424269	0
vax2	M06325_2.00	chr22:38842896-38843396	anos1b	0.0806142	Body	0.125836	vax2->chr22:38842896-38843396->anos1b	Act	1.95011	0.650585	1.38733
foxp4	M00793_2.00	chr7:33349306-33349806	anp32a	0.0604656	Body	0.0891994	foxp4->chr7:33349306-33349806->anp32a	Act	1.82548	0.6319	0.54332
sox3	M04567	chr7:33349859-33350359	anp32a	0.051003	Body	0.0751172	sox3->chr7:33349859-33350359->anp32a	Act	1.41389	0.6319	0
vsx2	M04451	chr7:33323548-33324048	anp32a	0.0818613	Inter	0.0558306	vsx2->chr7:33323548-33324048->anp32a	Act	0.386502	0.6319	1.30162
hmga1a	M01105_2.00	chr7:33575274-33575774	anp32a	0.085588	Inter	0.0814684	hmga1a->chr7:33575274-33575774->anp32a	Act	1.97383	0.6319	1.3082
foxp4	M03056_2.00	chr7:33575274-33575774	anp32a	0.138951	Inter	0.0891994	foxp4->chr7:33575274-33575774->anp32a	Act	1.82548	0.6319	1.3082
sox3	M05791_2.00	chr7:33579552-33580052	anp32a	0.232289	Inter	0.0751172	sox3->chr7:33579552-33580052->anp32a	Act	1.41389	0.6319	0.798679
hmga1a	M00750	chr7:33592890-33593390	anp32a	0.0926791	Inter	0.0814684	hmga1a->chr7:33592890-33593390->anp32a	Act	1.97383	0.6319	1.44741
sox3	M08899	chr7:33592890-33593390	anp32a	0.204386	Inter	0.0751172	sox3->chr7:33592890-33593390->anp32a	Act	1.41389	0.6319	1.44741
foxp4	M03056_2.00	chr7:33592890-33593390	anp32a	0.138951	Inter	0.0891994	foxp4->chr7:33592890-33593390->anp32a	Act	1.82548	0.6319	1.44741
sox3	M07127	chr7:33593510-33594010	anp32a	0.256309	Inter	0.0751172	sox3->chr7:33593510-33594010->anp32a	Act	1.41389	0.6319	1.92926
sox3	M03496_2.00	chr7:33595570-33596070	anp32a	0.0688526	Inter	0.0751172	sox3->chr7:33595570-33596070->anp32a	Act	1.41389	0.6319	0
foxp4	M04813_2.00	chr7:33596102-33596602	anp32a	0.101624	Inter	0.0891994	foxp4->chr7:33596102-33596602->anp32a	Act	1.82548	0.6319	0.553742
sox3	M08042_2.00	chr7:33596102-33596602	anp32a	0.195877	Inter	0.0751172	sox3->chr7:33596102-33596602->anp32a	Act	1.41389	0.6319	0.553742
foxp4	M04813_2.00	chr7:33596709-33597209	anp32a	0.101624	Inter	0.0891994	foxp4->chr7:33596709-33597209->anp32a	Act	1.82548	0.6319	0
sox3	M01014	chr7:33347757-33348257	anp32a	0.180849	TSS	0.0751172	sox3->chr7:33347757-33348257->anp32a	Act	1.41389	0.6319	0
foxp4	M00258_2.00	chr7:33347757-33348257	anp32a	0.148869	TSS	0.0891994	foxp4->chr7:33347757-33348257->anp32a	Act	1.82548	0.6319	0
hmga1a	M01674_2.00	chr7:33347757-33348257	anp32a	0.116991	TSS	0.0814684	hmga1a->chr7:33347757-33348257->anp32a	Act	1.97383	0.6319	0
tcf7l1b	M09386_2.00	chr7:33347757-33348257	anp32a	0.088885	TSS	0.0788325	tcf7l1b->chr7:33347757-33348257->anp32a	Act	0.581799	0.6319	0
sox3	M00213_2.00	chr7:33348442-33348942	anp32a	0.20099	TSS	0.0751172	sox3->chr7:33348442-33348942->anp32a	Act	1.41389	0.6319	0
tcf7l1b	M09400_2.00	chr7:33348442-33348942	anp32a	0.195293	TSS	0.0788325	tcf7l1b->chr7:33348442-33348942->anp32a	Act	0.581799	0.6319	0
vsx2	M04451	chr7:33350757-33351257	anp32a	0.0818613	TSS	0.0558306	vsx2->chr7:33350757-33351257->anp32a	Act	0.386502	0.6319	0
sox3	M00197_2.00	chr7:33350757-33351257	anp32a	0.164175	TSS	0.0751172	sox3->chr7:33350757-33351257->anp32a	Act	1.41389	0.6319	0
foxp4	M00792_2.00	chr7:33350757-33351257	anp32a	0.0540947	TSS	0.0891994	foxp4->chr7:33350757-33351257->anp32a	Act	1.82548	0.6319	0
sox3	M00197_2.00	chr7:33351284-33351784	anp32a	0.164175	TSS	0.0751172	sox3->chr7:33351284-33351784->anp32a	Act	1.41389	0.6319	0
foxp4	M03056_2.00	chr7:33351284-33351784	anp32a	0.138951	TSS	0.0891994	foxp4->chr7:33351284-33351784->anp32a	Act	1.82548	0.6319	0
sox3	M01014	chr7:33351959-33352459	anp32a	0.180849	TSS	0.0751172	sox3->chr7:33351959-33352459->anp32a	Act	1.41389	0.6319	0
hmga1a	M01653	chr1:26663997-26664497	anp32b	0.128595	Body	0.143604	hmga1a->chr1:26663997-26664497->anp32b	Act	1.97383	0.739046	0
foxp4	M04811_2.00	chr1:26663997-26664497	anp32b	0.0667533	Body	0.134486	foxp4->chr1:26663997-26664497->anp32b	Act	1.82548	0.739046	0
sox3	M09387_2.00	chr1:26663997-26664497	anp32b	0.22818	Body	0.0583049	sox3->chr1:26663997-26664497->anp32b	Act	1.41389	0.739046	0
hmga1a	M01653	chr1:26664595-26665095	anp32b	0.128595	Body	0.143604	hmga1a->chr1:26664595-26665095->anp32b	Act	1.97383	0.739046	0.682812
sox3	M03978_2.00	chr1:26664595-26665095	anp32b	0.0762392	Body	0.0583049	sox3->chr1:26664595-26665095->anp32b	Act	1.41389	0.739046	0.682812
foxp4	M06203_2.00	chr1:26664595-26665095	anp32b	0.172102	Body	0.134486	foxp4->chr1:26664595-26665095->anp32b	Act	1.82548	0.739046	0.682812
tcf7l1b	M09400_2.00	chr1:26664595-26665095	anp32b	0.195293	Body	0.113067	tcf7l1b->chr1:26664595-26665095->anp32b	Act	0.581799	0.739046	0.682812
hmga1a	M01676_2.00	chr1:26662991-26663491	anp32b	0.0945597	TSS	0.143604	hmga1a->chr1:26662991-26663491->anp32b	Act	1.97383	0.739046	0
foxp4	M04811_2.00	chr1:26662991-26663491	anp32b	0.0667533	TSS	0.134486	foxp4->chr1:26662991-26663491->anp32b	Act	1.82548	0.739046	0
sox3	M09396_2.00	chr1:26662991-26663491	anp32b	0.259109	TSS	0.0583049	sox3->chr1:26662991-26663491->anp32b	Act	1.41389	0.739046	0
hmga1a	M01676_2.00	chr1:26663496-26663996	anp32b	0.0945597	TSS	0.143604	hmga1a->chr1:26663496-26663996->anp32b	Act	1.97383	0.739046	0
foxp4	M04811_2.00	chr1:26663496-26663996	anp32b	0.0667533	TSS	0.134486	foxp4->chr1:26663496-26663996->anp32b	Act	1.82548	0.739046	0
sox3	M09396_2.00	chr1:26663496-26663996	anp32b	0.259109	TSS	0.0583049	sox3->chr1:26663496-26663996->anp32b	Act	1.41389	0.739046	0
gli1	M03871	chr6:49673206-49673706	apcdd1l	0.0839124	Body	0.253158	gli1->chr6:49673206-49673706->apcdd1l	Act	1.0507	0.995722	0.862736
foxp4	M03055_2.00	chr6:49673206-49673706	apcdd1l	0.0611115	Body	0.250829	foxp4->chr6:49673206-49673706->apcdd1l	Act	1.82548	0.995722	0.862736
foxp4	M03056_2.00	chr6:49428461-49428961	apcdd1l	0.138951	Inter	0.250829	foxp4->chr6:49428461-49428961->apcdd1l	Act	1.82548	0.995722	0
gli1	M02732_2.00	chr6:49524014-49524514	apcdd1l	0.107258	Inter	0.253158	gli1->chr6:49524014-49524514->apcdd1l	Act	1.0507	0.995722	2.15079
foxp4	M04811_2.00	chr6:49524014-49524514	apcdd1l	0.0667533	Inter	0.250829	foxp4->chr6:49524014-49524514->apcdd1l	Act	1.82548	0.995722	2.15079
tcf7l1b	M04005	chr6:49805076-49805576	apcdd1l	0.129554	Inter	0.251792	tcf7l1b->chr6:49805076-49805576->apcdd1l	Act	0.581799	0.995722	0
gli1	M07290	chr6:49805076-49805576	apcdd1l	0.102101	Inter	0.253158	gli1->chr6:49805076-49805576->apcdd1l	Act	1.0507	0.995722	0
gli1	M01037	chr6:49810454-49810954	apcdd1l	0.0774041	Inter	0.253158	gli1->chr6:49810454-49810954->apcdd1l	Act	1.0507	0.995722	4.71933
pax2a	M09341_2.00	chr6:49810454-49810954	apcdd1l	0.107404	Inter	0.25236	pax2a->chr6:49810454-49810954->apcdd1l	Act	1.36554	0.995722	4.71933
rx1	M06503_2.00	chr1:19671706-19672206	apela	0.07077	Body	0.0932634	rx1->chr1:19671706-19672206->apela	Act	0.447176	0.487656	1.82255
rx1	M00462_2.00	chr1:19672232-19672732	apela	0.137924	Body	0.0932634	rx1->chr1:19672232-19672732->apela	Act	0.447176	0.487656	5.68415
gli1	M03871	chr1:19673682-19674182	apela	0.0839124	Body	0.102002	gli1->chr1:19673682-19674182->apela	Act	1.0507	0.487656	0
rx1	M09583_2.00	chr1:19652526-19653026	apela	0.080195	Inter	0.0932634	rx1->chr1:19652526-19653026->apela	Act	0.447176	0.487656	1.994
gli1	M03871	chr1:19890342-19890842	apela	0.0839124	Inter	0.102002	gli1->chr1:19890342-19890842->apela	Act	1.0507	0.487656	3.53212
gli2b	M04402_2.00	chr1:19890342-19890842	apela	0.0612661	Inter	0.113461	gli2b->chr1:19890342-19890842->apela	Act	0.548577	0.487656	3.53212
foxp4	M04813_2.00	chr1:19890342-19890842	apela	0.101624	Inter	0.125317	foxp4->chr1:19890342-19890842->apela	Act	1.82548	0.487656	3.53212
rx1	M09169_2.00	chr1:19890342-19890842	apela	0.10364	Inter	0.0932634	rx1->chr1:19890342-19890842->apela	Act	0.447176	0.487656	3.53212
hmga1a	M01104_2.00	chr4:5333753-5334253	apex1	0.0621451	Body	0.0480272	hmga1a->chr4:5333753-5334253->apex1	Act	1.97383	0.382412	0
foxp4	M03013_2.00	chr4:5333753-5334253	apex1	0.0547288	Body	0.081142	foxp4->chr4:5333753-5334253->apex1	Act	1.82548	0.382412	0
rxrba	M09608_2.00	chr4:5111724-5112224	apex1	0.0545378	Inter	0.0459099	rxrba->chr4:5111724-5112224->apex1	Act	0.312547	0.382412	0.706276
gli1	M03871	chr4:5334464-5334964	apex1	0.0839124	TSS	0.0650551	gli1->chr4:5334464-5334964->apex1	Act	1.0507	0.382412	0
gli1	M07292	chr5:38119853-38120353	apoa1a	0.105727	Inter	0.132422	gli1->chr5:38119853-38120353->apoa1a	Act	1.0507	0.669556	0
tcf7l1b	M09386_2.00	chr21:24605061-24605561	arhgap32b	0.088885	Body	0.202574	tcf7l1b->chr21:24605061-24605561->arhgap32b	Act	0.581799	0.728552	0
foxp4	M03021_2.00	chr21:24606929-24607429	arhgap32b	0.177465	Body	0.187164	foxp4->chr21:24606929-24607429->arhgap32b	Act	1.82548	0.728552	0
rarab	M06427_2.00	chr21:24619552-24620052	arhgap32b	0.0631066	Body	0.0745399	rarab->chr21:24619552-24620052->arhgap32b	Act	0.525974	0.728552	0
rarab	M02404_2.00	chr21:24643037-24643537	arhgap32b	0.0566025	Inter	0.0745399	rarab->chr21:24643037-24643537->arhgap32b	Act	0.525974	0.728552	2.01021
foxp4	M06202_2.00	chr21:24643037-24643537	arhgap32b	0.195278	Inter	0.187164	foxp4->chr21:24643037-24643537->arhgap32b	Act	1.82548	0.728552	2.01021
tcf7l1b	M09392_2.00	chr21:24643037-24643537	arhgap32b	0.219956	Inter	0.202574	tcf7l1b->chr21:24643037-24643537->arhgap32b	Act	0.581799	0.728552	2.01021
vax2	M05038_2.00	chr21:24648027-24648527	arhgap32b	0.0539775	Inter	0.100926	vax2->chr21:24648027-24648527->arhgap32b	Act	1.95011	0.728552	1.67906
rx1	M05155_2.00	chr21:24648027-24648527	arhgap32b	0.0583978	Inter	0.122425	rx1->chr21:24648027-24648527->arhgap32b	Act	0.447176	0.728552	1.67906
vax2	M00286_2.00	chr21:24648545-24649045	arhgap32b	0.0599043	Inter	0.100926	vax2->chr21:24648545-24649045->arhgap32b	Act	1.95011	0.728552	1.65386
rx1	M00393_2.00	chr21:24648545-24649045	arhgap32b	0.148077	Inter	0.122425	rx1->chr21:24648545-24649045->arhgap32b	Act	0.447176	0.728552	1.65386
foxp4	M03055_2.00	chr3:59899230-59899730	arhgdia	0.0611115	Body	0.049501	foxp4->chr3:59899230-59899730->arhgdia	Act	1.82548	0.356002	0
foxp4	M03021_2.00	chr15:22463405-22463905	arhgef12a	0.177465	Body	0.183963	foxp4->chr15:22463405-22463905->arhgef12a	Act	1.82548	0.432221	0
rx1	M03288_2.00	chr15:22467355-22467855	arhgef12a	0.0736921	Body	0.112613	rx1->chr15:22467355-22467855->arhgef12a	Act	0.447176	0.432221	2.68851
tcf7l1b	M09394_2.00	chr15:22467355-22467855	arhgef12a	0.0545859	Body	0.180262	tcf7l1b->chr15:22467355-22467855->arhgef12a	Act	0.581799	0.432221	2.68851
gli1	M03871	chr15:22324638-22325138	arhgef12a	0.0839124	Inter	0.157834	gli1->chr15:22324638-22325138->arhgef12a	Act	1.0507	0.432221	4.22462
hmga2	M01678_2.00	chr15:22446048-22446548	arhgef12a	0.0542592	Inter	0.129372	hmga2->chr15:22446048-22446548->arhgef12a	Act	0.700029	0.432221	0
rx1	M05091_2.00	chr15:22446048-22446548	arhgef12a	0.059789	Inter	0.112613	rx1->chr15:22446048-22446548->arhgef12a	Act	0.447176	0.432221	0
foxp4	M09083_2.00	chr15:22446048-22446548	arhgef12a	0.117639	Inter	0.183963	foxp4->chr15:22446048-22446548->arhgef12a	Act	1.82548	0.432221	0
foxp4	M04813_2.00	chr2:26431668-26432168	asph	0.101624	Inter	0.0931963	foxp4->chr2:26431668-26432168->asph	Act	1.82548	1.44139	3.4989
gli2b	M02642_2.00	chr2:26502702-26503202	asph	0.0838453	Inter	0.0852609	gli2b->chr2:26502702-26503202->asph	Act	0.548577	1.44139	0.744302
foxp4	M04813_2.00	chr2:26502702-26503202	asph	0.101624	Inter	0.0931963	foxp4->chr2:26502702-26503202->asph	Act	1.82548	1.44139	0.744302
rx1	M00462_2.00	chr2:26656659-26657159	asph	0.137924	TSS	0.0938339	rx1->chr2:26656659-26657159->asph	Act	0.447176	1.44139	0
foxp4	M03021_2.00	chr2:26656659-26657159	asph	0.177465	TSS	0.0931963	foxp4->chr2:26656659-26657159->asph	Act	1.82548	1.44139	0
hmga1a	M01105_2.00	chr22:23546605-23547105	aspm	0.085588	Body	0.288219	hmga1a->chr22:23546605-23547105->aspm	Act	1.97383	0.770257	0.540474
foxp4	M04811_2.00	chr22:23546605-23547105	aspm	0.0667533	Body	0.186665	foxp4->chr22:23546605-23547105->aspm	Act	1.82548	0.770257	0.540474
olig2	M10019	chr22:23317207-23317707	aspm	0.0955375	Inter	0.148411	olig2->chr22:23317207-23317707->aspm	Act	0.702238	0.770257	0
sox3	M05769_2.00	chr22:23318462-23318962	aspm	0.162592	Inter	0.160856	sox3->chr22:23318462-23318962->aspm	Act	1.41389	0.770257	0
hmga1a	M02652_2.00	chr22:23332544-23333044	aspm	0.167321	Inter	0.288219	hmga1a->chr22:23332544-23333044->aspm	Act	1.97383	0.770257	2.30284
olig2	M10019	chr22:23337157-23337657	aspm	0.0955375	Inter	0.148411	olig2->chr22:23337157-23337657->aspm	Act	0.702238	0.770257	0
hmga1a	M02652_2.00	chr22:23337157-23337657	aspm	0.167321	Inter	0.288219	hmga1a->chr22:23337157-23337657->aspm	Act	1.97383	0.770257	0
foxp4	M06203_2.00	chr22:23337157-23337657	aspm	0.172102	Inter	0.186665	foxp4->chr22:23337157-23337657->aspm	Act	1.82548	0.770257	0
ctcf	M07551_2.00	chr22:23337157-23337657	aspm	0.0669092	Inter	0.119592	ctcf->chr22:23337157-23337657->aspm	Act	0.389922	0.770257	0
sox3	M09388_2.00	chr22:23337157-23337657	aspm	0.248652	Inter	0.160856	sox3->chr22:23337157-23337657->aspm	Act	1.41389	0.770257	0
tcf7l1b	M09400_2.00	chr22:23337157-23337657	aspm	0.195293	Inter	0.179599	tcf7l1b->chr22:23337157-23337657->aspm	Act	0.581799	0.770257	0
foxp4	M03753_2.00	chr22:23356534-23357034	aspm	0.101577	Inter	0.186665	foxp4->chr22:23356534-23357034->aspm	Act	1.82548	0.770257	3.47422
sox3	M11331_2.00	chr22:23356534-23357034	aspm	0.19351	Inter	0.160856	sox3->chr22:23356534-23357034->aspm	Act	1.41389	0.770257	3.47422
sox3	M09709	chr22:23357070-23357570	aspm	0.272116	Inter	0.160856	sox3->chr22:23357070-23357570->aspm	Act	1.41389	0.770257	1.64688
foxp4	M03753_2.00	chr22:23357070-23357570	aspm	0.101577	Inter	0.186665	foxp4->chr22:23357070-23357570->aspm	Act	1.82548	0.770257	1.64688
hmga1a	M01010	chr22:23374402-23374902	aspm	0.20474	Inter	0.288219	hmga1a->chr22:23374402-23374902->aspm	Act	1.97383	0.770257	2.76704
sox3	M04567	chr22:23374402-23374902	aspm	0.051003	Inter	0.160856	sox3->chr22:23374402-23374902->aspm	Act	1.41389	0.770257	2.76704
foxp4	M06202_2.00	chr22:23374402-23374902	aspm	0.195278	Inter	0.186665	foxp4->chr22:23374402-23374902->aspm	Act	1.82548	0.770257	2.76704
ctcf	M07551_2.00	chr22:23374402-23374902	aspm	0.0669092	Inter	0.119592	ctcf->chr22:23374402-23374902->aspm	Act	0.389922	0.770257	2.76704
tcf7l1b	M09386_2.00	chr22:23374402-23374902	aspm	0.088885	Inter	0.179599	tcf7l1b->chr22:23374402-23374902->aspm	Act	0.581799	0.770257	2.76704
tcf7l1b	M09386_2.00	chr22:23374929-23375429	aspm	0.088885	Inter	0.179599	tcf7l1b->chr22:23374929-23375429->aspm	Act	0.581799	0.770257	0
gli1	M01037	chr1:5454920-5455420	atic	0.0774041	Body	0.150255	gli1->chr1:5454920-5455420->atic	Act	1.0507	0.805788	0
gli2b	M01703	chr1:5454920-5455420	atic	0.0797733	Body	0.131232	gli2b->chr1:5454920-5455420->atic	Act	0.548577	0.805788	0
gli1	M02643_2.00	chr1:5468208-5468708	atic	0.143629	Body	0.150255	gli1->chr1:5468208-5468708->atic	Act	1.0507	0.805788	3.65398
gli2b	M02643_2.00	chr1:5468208-5468708	atic	0.0824732	Body	0.131232	gli2b->chr1:5468208-5468708->atic	Act	0.548577	0.805788	3.65398
rx1	M06276_2.00	chr1:5254748-5255248	atic	0.071885	Inter	0.130191	rx1->chr1:5254748-5255248->atic	Act	0.447176	0.805788	0
pax2a	M08160_2.00	chr1:5268516-5269016	atic	0.103046	Inter	0.123647	pax2a->chr1:5268516-5269016->atic	Act	1.36554	0.805788	2.21592
vsx2	M00437	chr1:5289703-5290203	atic	0.129267	Inter	0.119825	vsx2->chr1:5289703-5290203->atic	Act	0.386502	0.805788	0
rx1	M00282_2.00	chr1:5289703-5290203	atic	0.109325	Inter	0.130191	rx1->chr1:5289703-5290203->atic	Act	0.447176	0.805788	0
rx1	M05155_2.00	chr21:16910371-16910871	atp2a2b	0.0583978	Inter	0.0926261	rx1->chr21:16910371-16910871->atp2a2b	Act	0.447176	0.606717	2.82856
rarab	M09297_2.00	chr21:16910371-16910871	atp2a2b	0.0633371	Inter	0.0395009	rarab->chr21:16910371-16910871->atp2a2b	Act	0.525974	0.606717	2.82856
rx1	M09136_2.00	chr21:17050755-17051255	atp2a2b	0.0670975	TSS	0.0926261	rx1->chr21:17050755-17051255->atp2a2b	Act	0.447176	0.606717	0
gli1	M03871	chr21:17051543-17052043	atp2a2b	0.0839124	TSS	0.103251	gli1->chr21:17051543-17052043->atp2a2b	Act	1.0507	0.606717	0
foxp4	M00256_2.00	chr22:16947195-16947695	atpaf1	0.0867577	Inter	0.0612538	foxp4->chr22:16947195-16947695->atpaf1	Act	1.82548	0.306609	1.2793
hmga1a	M01679_2.00	chr14:246210-246710	aurkb	0.0647468	Body	0.133321	hmga1a->chr14:246210-246710->aurkb	Act	1.97383	0.404775	0.753072
foxp4	M03021_2.00	chr14:246210-246710	aurkb	0.177465	Body	0.066891	foxp4->chr14:246210-246710->aurkb	Act	1.82548	0.404775	0.753072
foxp4	M03021_2.00	chr14:28254-28754	aurkb	0.177465	Inter	0.066891	foxp4->chr14:28254-28754->aurkb	Act	1.82548	0.404775	0
foxp4	M04813_2.00	chr14:93009-93509	aurkb	0.101624	Inter	0.066891	foxp4->chr14:93009-93509->aurkb	Act	1.82548	0.404775	0.566587
foxp4	M03021_2.00	chr14:382263-382763	aurkb	0.177465	Inter	0.066891	foxp4->chr14:382263-382763->aurkb	Act	1.82548	0.404775	0.75564
tcf7l1b	M09392_2.00	chr14:382263-382763	aurkb	0.219956	Inter	0.0691249	tcf7l1b->chr14:382263-382763->aurkb	Act	0.581799	0.404775	0.75564
tcf7l1b	M09392_2.00	chr14:382811-383311	aurkb	0.219956	Inter	0.0691249	tcf7l1b->chr14:382811-383311->aurkb	Act	0.581799	0.404775	0
hmga1a	M01691_2.00	chr14:390834-391334	aurkb	0.248183	Inter	0.133321	hmga1a->chr14:390834-391334->aurkb	Act	1.97383	0.404775	0
hmga1a	M01653	chr14:429864-430364	aurkb	0.128595	Inter	0.133321	hmga1a->chr14:429864-430364->aurkb	Act	1.97383	0.404775	2.05772
foxp4	M03013_2.00	chr14:429864-430364	aurkb	0.0547288	Inter	0.066891	foxp4->chr14:429864-430364->aurkb	Act	1.82548	0.404775	2.05772
tcf7l1b	M11337_2.00	chr14:429864-430364	aurkb	0.0640786	Inter	0.0691249	tcf7l1b->chr14:429864-430364->aurkb	Act	0.581799	0.404775	2.05772
hmga1a	M01653	chr14:453266-453766	aurkb	0.128595	Inter	0.133321	hmga1a->chr14:453266-453766->aurkb	Act	1.97383	0.404775	0
tcf7l1b	M04005	chr14:454511-455011	aurkb	0.129554	Inter	0.0691249	tcf7l1b->chr14:454511-455011->aurkb	Act	0.581799	0.404775	1.23096
foxp4	M03021_2.00	chr14:454511-455011	aurkb	0.177465	Inter	0.066891	foxp4->chr14:454511-455011->aurkb	Act	1.82548	0.404775	1.23096
foxp4	M03051_2.00	chr14:455863-456363	aurkb	0.165253	Inter	0.066891	foxp4->chr14:455863-456363->aurkb	Act	1.82548	0.404775	0
foxp4	M03051_2.00	chr14:456511-457011	aurkb	0.165253	Inter	0.066891	foxp4->chr14:456511-457011->aurkb	Act	1.82548	0.404775	3.12968
hmga1a	M01688_2.00	chr14:476762-477262	aurkb	0.262627	Inter	0.133321	hmga1a->chr14:476762-477262->aurkb	Act	1.97383	0.404775	0
foxp4	M03021_2.00	chr14:480933-481433	aurkb	0.177465	Inter	0.066891	foxp4->chr14:480933-481433->aurkb	Act	1.82548	0.404775	1.47942
foxp4	M03055_2.00	chr14:494826-495326	aurkb	0.0611115	Inter	0.066891	foxp4->chr14:494826-495326->aurkb	Act	1.82548	0.404775	5.12763
foxp4	M03021_2.00	chr14:245347-245847	aurkb	0.177465	TSS	0.066891	foxp4->chr14:245347-245847->aurkb	Act	1.82548	0.404775	0
hmga1a	M01679_2.00	chr14:246785-247285	aurkb	0.0647468	TSS	0.133321	hmga1a->chr14:246785-247285->aurkb	Act	1.97383	0.404775	0
foxp4	M03019_2.00	chr14:246785-247285	aurkb	0.105495	TSS	0.066891	foxp4->chr14:246785-247285->aurkb	Act	1.82548	0.404775	0
hmga1a	M01653	chr21:26715066-26715566	banf1	0.128595	Body	0.152914	hmga1a->chr21:26715066-26715566->banf1	Act	1.97383	0.645212	0
foxp4	M03021_2.00	chr21:26715715-26716215	banf1	0.177465	TSS	0.130034	foxp4->chr21:26715715-26716215->banf1	Act	1.82548	0.645212	0
hmga1a	M01010	chr6:11829561-11830061	baz2ba	0.20474	Body	0.272953	hmga1a->chr6:11829561-11830061->baz2ba	Act	1.97383	0.323026	0
foxp4	M03051_2.00	chr6:11831441-11831941	baz2ba	0.165253	Body	0.145132	foxp4->chr6:11831441-11831941->baz2ba	Act	1.82548	0.323026	0
tcf7l1b	M00712_2.00	chr6:11865255-11865755	baz2ba	0.213137	Body	0.112921	tcf7l1b->chr6:11865255-11865755->baz2ba	Act	0.581799	0.323026	4.96793
tcf7l1b	M04005	chr6:11969936-11970436	baz2ba	0.129554	Body	0.112921	tcf7l1b->chr6:11969936-11970436->baz2ba	Act	0.581799	0.323026	0
foxp4	M00258_2.00	chr6:11815714-11816214	baz2ba	0.148869	Inter	0.145132	foxp4->chr6:11815714-11816214->baz2ba	Act	1.82548	0.323026	0.951427
hmga1a	M01674_2.00	chr6:11816395-11816895	baz2ba	0.116991	Inter	0.272953	hmga1a->chr6:11816395-11816895->baz2ba	Act	1.97383	0.323026	2.74625
hmga1a	M01691_2.00	chr6:11817094-11817594	baz2ba	0.248183	Inter	0.272953	hmga1a->chr6:11817094-11817594->baz2ba	Act	1.97383	0.323026	2.41101
foxp4	M01976_2.00	chr6:11818877-11819377	baz2ba	0.0540947	Inter	0.145132	foxp4->chr6:11818877-11819377->baz2ba	Act	1.82548	0.323026	1.61546
foxp4	M03051_2.00	chr6:11827197-11827697	baz2ba	0.165253	Inter	0.145132	foxp4->chr6:11827197-11827697->baz2ba	Act	1.82548	0.323026	0
foxp4	M04813_2.00	chr6:12005122-12005622	baz2ba	0.101624	Inter	0.145132	foxp4->chr6:12005122-12005622->baz2ba	Act	1.82548	0.323026	0
hmga1a	M00750	chr6:11828968-11829468	baz2ba	0.0926791	TSS	0.272953	hmga1a->chr6:11828968-11829468->baz2ba	Act	1.97383	0.323026	0
foxp4	M04814_2.00	chr6:11828968-11829468	baz2ba	0.158053	TSS	0.145132	foxp4->chr6:11828968-11829468->baz2ba	Act	1.82548	0.323026	0
tcf7l1b	M09400_2.00	chr6:11828968-11829468	baz2ba	0.195293	TSS	0.112921	tcf7l1b->chr6:11828968-11829468->baz2ba	Act	0.581799	0.323026	0
foxp4	M03056_2.00	chr3:29783719-29784219	bcat2	0.138951	Inter	0.0823356	foxp4->chr3:29783719-29784219->bcat2	Act	1.82548	0.391649	1.51722
rx1	M03879_2.00	chr3:29783719-29784219	bcat2	0.176841	Inter	0.0619838	rx1->chr3:29783719-29784219->bcat2	Act	0.447176	0.391649	1.51722
tcf7l1b	M09386_2.00	chr3:29783719-29784219	bcat2	0.088885	Inter	0.0827146	tcf7l1b->chr3:29783719-29784219->bcat2	Act	0.581799	0.391649	1.51722
hmga2	M01678_2.00	chr3:29856169-29856669	bcat2	0.0542592	Inter	0.0682036	hmga2->chr3:29856169-29856669->bcat2	Act	0.700029	0.391649	1.3183
rx1	M06500_2.00	chr3:29856169-29856669	bcat2	0.109153	Inter	0.0619838	rx1->chr3:29856169-29856669->bcat2	Act	0.447176	0.391649	1.3183
tcf7l1b	M04005	chr3:29967447-29967947	bcat2	0.129554	TSS	0.0827146	tcf7l1b->chr3:29967447-29967947->bcat2	Act	0.581799	0.391649	0
rx1	M03181_2.00	chr3:29968088-29968588	bcat2	0.0639697	TSS	0.0619838	rx1->chr3:29968088-29968588->bcat2	Act	0.447176	0.391649	0
foxp4	M03013_2.00	chr12:45166673-45167173	bccip	0.0547288	Inter	0.0648646	foxp4->chr12:45166673-45167173->bccip	Act	1.82548	0.504228	0
foxp4	M00258_2.00	chr12:45196191-45196691	bccip	0.148869	TSS	0.0648646	foxp4->chr12:45196191-45196691->bccip	Act	1.82548	0.504228	0
gli1	M03871	chr23:6417630-6418130	bmp7b	0.0839124	Inter	0.258091	gli1->chr23:6417630-6418130->bmp7b	Act	1.0507	1.29752	2.72497
foxp4	M00258_2.00	chr23:6417630-6418130	bmp7b	0.148869	Inter	0.30753	foxp4->chr23:6417630-6418130->bmp7b	Act	1.82548	1.29752	2.72497
vax2	M03112_2.00	chr23:6726799-6727299	bmp7b	0.0997202	Inter	0.214422	vax2->chr23:6726799-6727299->bmp7b	Act	1.95011	1.29752	0
rx1	M06230_2.00	chr23:6726799-6727299	bmp7b	0.0641558	Inter	0.17024	rx1->chr23:6726799-6727299->bmp7b	Act	0.447176	1.29752	0
foxp4	M04813_2.00	chr23:6521252-6521752	bmp7b	0.101624	TSS	0.30753	foxp4->chr23:6521252-6521752->bmp7b	Act	1.82548	1.29752	0
hmga1a	M01679_2.00	chr13:22555571-22556071	bmpr1aa	0.0647468	Body	0.046837	hmga1a->chr13:22555571-22556071->bmpr1aa	Act	1.97383	0.972141	1.0515
rx1	M05224_2.00	chr13:22555571-22556071	bmpr1aa	0.0903625	Body	0.173725	rx1->chr13:22555571-22556071->bmpr1aa	Act	0.447176	0.972141	1.0515
smad1	M01590	chr13:22557204-22557704	bmpr1aa	0.118984	Body	0.194853	smad1->chr13:22557204-22557704->bmpr1aa	Act	1.01155	0.972141	0
rx1	M10714_2.00	chr13:22557204-22557704	bmpr1aa	0.0573307	Body	0.173725	rx1->chr13:22557204-22557704->bmpr1aa	Act	0.447176	0.972141	0
gli2b	M03902	chr13:22598913-22599413	bmpr1aa	0.0759209	Body	0.121046	gli2b->chr13:22598913-22599413->bmpr1aa	Act	0.548577	0.972141	1.38211
gli1	M02876_2.00	chr13:22598913-22599413	bmpr1aa	0.124253	Body	0.166352	gli1->chr13:22598913-22599413->bmpr1aa	Act	1.0507	0.972141	1.38211
foxp4	M03753_2.00	chr13:22600630-22601130	bmpr1aa	0.101577	Body	0.242603	foxp4->chr13:22600630-22601130->bmpr1aa	Act	1.82548	0.972141	0.992361
rx1	M05008_2.00	chr13:22600630-22601130	bmpr1aa	0.123951	Body	0.173725	rx1->chr13:22600630-22601130->bmpr1aa	Act	0.447176	0.972141	0.992361
rx1	M10714_2.00	chr13:22601227-22601727	bmpr1aa	0.0573307	Body	0.173725	rx1->chr13:22601227-22601727->bmpr1aa	Act	0.447176	0.972141	2.09799
foxp4	M03051_2.00	chr13:22377628-22378128	bmpr1aa	0.165253	Inter	0.242603	foxp4->chr13:22377628-22378128->bmpr1aa	Act	1.82548	0.972141	3.06235
rx1	M06339_2.00	chr13:22377628-22378128	bmpr1aa	0.0634377	Inter	0.173725	rx1->chr13:22377628-22378128->bmpr1aa	Act	0.447176	0.972141	3.06235
hmga1a	M01106_2.00	chr13:22738017-22738517	bmpr1aa	0.18297	Inter	0.046837	hmga1a->chr13:22738017-22738517->bmpr1aa	Act	1.97383	0.972141	2.24191
gli1	M01702	chr12:25997830-25998330	bmpr1ab	0.12812	Body	0.181753	gli1->chr12:25997830-25998330->bmpr1ab	Act	1.0507	0.89537	0
pax2a	M09342_2.00	chr12:25999520-26000020	bmpr1ab	0.111979	Body	0.149457	pax2a->chr12:25999520-26000020->bmpr1ab	Act	1.36554	0.89537	0
rarab	M06427_2.00	chr12:26010181-26010681	bmpr1ab	0.0631066	Body	0.0806368	rarab->chr12:26010181-26010681->bmpr1ab	Act	0.525974	0.89537	2.20919
foxp4	M03013_2.00	chr12:26021869-26022369	bmpr1ab	0.0547288	Body	0.234232	foxp4->chr12:26021869-26022369->bmpr1ab	Act	1.82548	0.89537	0
gli1	M03871	chr12:25805900-25806400	bmpr1ab	0.0839124	Inter	0.181753	gli1->chr12:25805900-25806400->bmpr1ab	Act	1.0507	0.89537	4.95252
pax2a	M04061	chr12:25805900-25806400	bmpr1ab	0.116157	Inter	0.149457	pax2a->chr12:25805900-25806400->bmpr1ab	Act	1.36554	0.89537	4.95252
rarab	M06427_2.00	chr12:25805900-25806400	bmpr1ab	0.0631066	Inter	0.0806368	rarab->chr12:25805900-25806400->bmpr1ab	Act	0.525974	0.89537	4.95252
rx1	M02166_2.00	chr12:26022506-26023006	bmpr1ab	0.113249	TSS	0.152064	rx1->chr12:26022506-26023006->bmpr1ab	Act	0.447176	0.89537	0
pax2a	M09341_2.00	chr12:26022506-26023006	bmpr1ab	0.107404	TSS	0.149457	pax2a->chr12:26022506-26023006->bmpr1ab	Act	1.36554	0.89537	0
rx1	M02166_2.00	chr12:26023035-26023535	bmpr1ab	0.113249	TSS	0.152064	rx1->chr12:26023035-26023535->bmpr1ab	Act	0.447176	0.89537	0
pax2a	M09341_2.00	chr12:26023035-26023535	bmpr1ab	0.107404	TSS	0.149457	pax2a->chr12:26023035-26023535->bmpr1ab	Act	1.36554	0.89537	0
foxp4	M06202_2.00	chr12:29370492-29370992	bms1	0.195278	Inter	0.15698	foxp4->chr12:29370492-29370992->bms1	Act	1.82548	0.559746	5.64598
tcf7l1b	M08428_2.00	chr12:29370492-29370992	bms1	0.131041	Inter	0.112611	tcf7l1b->chr12:29370492-29370992->bms1	Act	0.581799	0.559746	5.64598
rx1	M05091_2.00	chr12:29372350-29372850	bms1	0.059789	Inter	0.100012	rx1->chr12:29372350-29372850->bms1	Act	0.447176	0.559746	1.37069
rx1	M05155_2.00	chr12:29400601-29401101	bms1	0.0583978	Inter	0.100012	rx1->chr12:29400601-29401101->bms1	Act	0.447176	0.559746	4.33771
rx1	M06230_2.00	chr12:29430728-29431228	bms1	0.0641558	Inter	0.100012	rx1->chr12:29430728-29431228->bms1	Act	0.447176	0.559746	2.63687
tcf7l1b	M04005	chr24:21231034-21231534	boc	0.129554	Body	0.268551	tcf7l1b->chr24:21231034-21231534->boc	Act	0.581799	0.346292	2.91896
foxp4	M03021_2.00	chr24:21246302-21246802	boc	0.177465	Body	0.28237	foxp4->chr24:21246302-21246802->boc	Act	1.82548	0.346292	0.600241
rx1	M03218_2.00	chr24:21246302-21246802	boc	0.111977	Body	0.197712	rx1->chr24:21246302-21246802->boc	Act	0.447176	0.346292	0.600241
vsx2	M10411	chr24:21247082-21247582	boc	0.12696	Body	0.176777	vsx2->chr24:21247082-21247582->boc	Act	0.386502	0.346292	0
rx1	M09180_2.00	chr24:21247082-21247582	boc	0.164346	Body	0.197712	rx1->chr24:21247082-21247582->boc	Act	0.447176	0.346292	0
vax2	M09180_2.00	chr24:21247082-21247582	boc	0.121429	Body	0.162091	vax2->chr24:21247082-21247582->boc	Act	1.95011	0.346292	0
tcf7l1b	M09638_2.00	chr24:21247082-21247582	boc	0.085538	Body	0.268551	tcf7l1b->chr24:21247082-21247582->boc	Act	0.581799	0.346292	0
foxp4	M00258_2.00	chr24:21258483-21258983	boc	0.148869	Body	0.28237	foxp4->chr24:21258483-21258983->boc	Act	1.82548	0.346292	0
pax2a	M07995_2.00	chr24:21258483-21258983	boc	0.103307	Body	0.190454	pax2a->chr24:21258483-21258983->boc	Act	1.36554	0.346292	0
rx1	M09583_2.00	chr24:21205209-21205709	boc	0.080195	Inter	0.197712	rx1->chr24:21205209-21205709->boc	Act	0.447176	0.346292	2.33494
rx1	M05009_2.00	chr24:21261012-21261512	boc	0.061166	Inter	0.197712	rx1->chr24:21261012-21261512->boc	Act	0.447176	0.346292	0
vax2	M05009_2.00	chr24:21261012-21261512	boc	0.0598355	Inter	0.162091	vax2->chr24:21261012-21261512->boc	Act	1.95011	0.346292	0
rx1	M00284_2.00	chr24:21274136-21274636	boc	0.081293	Inter	0.197712	rx1->chr24:21274136-21274636->boc	Act	0.447176	0.346292	0
vax2	M00284_2.00	chr24:21274136-21274636	boc	0.0823731	Inter	0.162091	vax2->chr24:21274136-21274636->boc	Act	1.95011	0.346292	0
vax2	M05038_2.00	chr24:21285503-21286003	boc	0.0539775	Inter	0.162091	vax2->chr24:21285503-21286003->boc	Act	1.95011	0.346292	0
rx1	M05155_2.00	chr24:21285503-21286003	boc	0.0583978	Inter	0.197712	rx1->chr24:21285503-21286003->boc	Act	0.447176	0.346292	0
gli1	M01042	chr24:21371433-21371933	boc	0.0904529	Inter	0.243287	gli1->chr24:21371433-21371933->boc	Act	1.0507	0.346292	1.74722
foxp4	M04813_2.00	chr24:21371433-21371933	boc	0.101624	Inter	0.28237	foxp4->chr24:21371433-21371933->boc	Act	1.82548	0.346292	1.74722
foxp4	M03021_2.00	chr24:21408890-21409390	boc	0.177465	Inter	0.28237	foxp4->chr24:21408890-21409390->boc	Act	1.82548	0.346292	2.58676
tcf7l1b	M09638_2.00	chr24:21408890-21409390	boc	0.085538	Inter	0.268551	tcf7l1b->chr24:21408890-21409390->boc	Act	0.581799	0.346292	2.58676
pax2a	M07995_2.00	chr24:21258993-21259493	boc	0.103307	TSS	0.190454	pax2a->chr24:21258993-21259493->boc	Act	1.36554	0.346292	1.09562
foxp4	M04814_2.00	chr19:3028841-3029341	bop1	0.158053	Body	0.272757	foxp4->chr19:3028841-3029341->bop1	Act	1.82548	0.545382	0
hmga1a	M01104_2.00	chr19:3055804-3056304	bop1	0.0621451	Body	0.0442107	hmga1a->chr19:3055804-3056304->bop1	Act	1.97383	0.545382	0
foxp4	M03013_2.00	chr19:3055804-3056304	bop1	0.0547288	Body	0.272757	foxp4->chr19:3055804-3056304->bop1	Act	1.82548	0.545382	0
tcf7l1b	M09394_2.00	chr19:3072245-3072745	bop1	0.0545859	Inter	0.212878	tcf7l1b->chr19:3072245-3072745->bop1	Act	0.581799	0.545382	0
foxp4	M04814_2.00	chr19:3179541-3180041	bop1	0.158053	Inter	0.272757	foxp4->chr19:3179541-3180041->bop1	Act	1.82548	0.545382	0
gli1	M04402_2.00	chr19:3056403-3056903	bop1	0.122871	TSS	0.218898	gli1->chr19:3056403-3056903->bop1	Act	1.0507	0.545382	0
gli2b	M04402_2.00	chr19:3056403-3056903	bop1	0.0612661	TSS	0.180965	gli2b->chr19:3056403-3056903->bop1	Act	0.548577	0.545382	0
pax2a	M08160_2.00	chr19:3056403-3056903	bop1	0.103046	TSS	0.184453	pax2a->chr19:3056403-3056903->bop1	Act	1.36554	0.545382	0
tcf7l1b	M08428_2.00	chr19:3056403-3056903	bop1	0.131041	TSS	0.212878	tcf7l1b->chr19:3056403-3056903->bop1	Act	0.581799	0.545382	0
tcf7l1b	M04005	chr21:18275727-18276227	brd3a	0.129554	TSS	0.0777287	tcf7l1b->chr21:18275727-18276227->brd3a	Act	0.581799	0.392454	0.733848
sox3	M00201_2.00	chr21:18275727-18276227	brd3a	0.109072	TSS	0.0549026	sox3->chr21:18275727-18276227->brd3a	Act	1.41389	0.392454	0.733848
vdrb	M04498	chr17:12764139-12764639	brms1la	0.0650149	TSS	0.0483549	vdrb->chr17:12764139-12764639->brms1la	Act	0.748488	0.74251	0
tcf7l1b	M09638_2.00	chr17:12764139-12764639	brms1la	0.085538	TSS	0.0783412	tcf7l1b->chr17:12764139-12764639->brms1la	Act	0.581799	0.74251	0
hmga1a	M01674_2.00	chr12:49151626-49152126	bub3	0.116991	TSS	0.100557	hmga1a->chr12:49151626-49152126->bub3	Act	1.97383	0.355148	0
foxp4	M03013_2.00	chr15:1764902-1765402	bud23	0.0547288	TSS	0.09647	foxp4->chr15:1764902-1765402->bud23	Act	1.82548	0.319159	0
sox3	M00710_2.00	chr17:6273768-6274268	BX000363.2	0.158352	Inter	0.140823	sox3->chr17:6273768-6274268->BX000363.2	Act	1.41389	1.15494	1.31751
tcf7l1b	M04005	chr17:6274705-6275205	BX000363.2	0.129554	Inter	0.108078	tcf7l1b->chr17:6274705-6275205->BX000363.2	Act	0.581799	1.15494	0
rarab	M02404_2.00	chr17:6274705-6275205	BX000363.2	0.0566025	Inter	0.0503803	rarab->chr17:6274705-6275205->BX000363.2	Act	0.525974	1.15494	0
sox3	M03498_2.00	chr17:6274705-6275205	BX000363.2	0.0764149	Inter	0.140823	sox3->chr17:6274705-6275205->BX000363.2	Act	1.41389	1.15494	0
sox3	M01014	chr17:6325227-6325727	BX000363.2	0.180849	Inter	0.140823	sox3->chr17:6325227-6325727->BX000363.2	Act	1.41389	1.15494	0
foxp4	M00256_2.00	chr6:24813174-24813674	BX004768.1	0.0867577	Inter	0.137481	foxp4->chr6:24813174-24813674->BX004768.1	Act	1.82548	0.544539	1.98618
sox3	M05751_2.00	chr22:18213819-18214319	BX664610.1	0.20866	Inter	0.239397	sox3->chr22:18213819-18214319->BX664610.1	Act	1.41389	0.681502	0
sox3	M03976_2.00	chr22:18215836-18216336	BX664610.1	0.179839	Inter	0.239397	sox3->chr22:18215836-18216336->BX664610.1	Act	1.41389	0.681502	0
sox3	M03515_2.00	chr22:18245664-18246164	BX664610.1	0.0633174	Inter	0.239397	sox3->chr22:18245664-18246164->BX664610.1	Act	1.41389	0.681502	0
foxp4	M00793_2.00	chr22:18250802-18251302	BX664610.1	0.0604656	Inter	0.0693756	foxp4->chr22:18250802-18251302->BX664610.1	Act	1.82548	0.681502	0
hmga1a	M01653	chr22:18253835-18254335	BX664610.1	0.128595	Inter	0.243365	hmga1a->chr22:18253835-18254335->BX664610.1	Act	1.97383	0.681502	0
sox3	M03973_2.00	chr22:18253835-18254335	BX664610.1	0.0775414	Inter	0.239397	sox3->chr22:18253835-18254335->BX664610.1	Act	1.41389	0.681502	0
sox3	M04566	chr22:18255930-18256430	BX664610.1	0.0761918	Inter	0.239397	sox3->chr22:18255930-18256430->BX664610.1	Act	1.41389	0.681502	2.0344
foxp4	M03021_2.00	chr22:18255930-18256430	BX664610.1	0.177465	Inter	0.0693756	foxp4->chr22:18255930-18256430->BX664610.1	Act	1.82548	0.681502	2.0344
foxp4	M03055_2.00	chr22:18256593-18257093	BX664610.1	0.0611115	Inter	0.0693756	foxp4->chr22:18256593-18257093->BX664610.1	Act	1.82548	0.681502	0
sox3	M03976_2.00	chr22:18256593-18257093	BX664610.1	0.179839	Inter	0.239397	sox3->chr22:18256593-18257093->BX664610.1	Act	1.41389	0.681502	0
sox3	M11331_2.00	chr22:18257283-18257783	BX664610.1	0.19351	Inter	0.239397	sox3->chr22:18257283-18257783->BX664610.1	Act	1.41389	0.681502	0
sox3	M03488_2.00	chr22:18259005-18259505	BX664610.1	0.0795183	Inter	0.239397	sox3->chr22:18259005-18259505->BX664610.1	Act	1.41389	0.681502	0
sox3	M03542_2.00	chr22:18259611-18260111	BX664610.1	0.0603006	Inter	0.239397	sox3->chr22:18259611-18260111->BX664610.1	Act	1.41389	0.681502	0.645924
olig2	M04186	chr22:18260433-18260933	BX664610.1	0.152052	Inter	0.220613	olig2->chr22:18260433-18260933->BX664610.1	Act	0.702238	0.681502	0
olig2	M04186	chr22:18260938-18261438	BX664610.1	0.152052	Inter	0.220613	olig2->chr22:18260938-18261438->BX664610.1	Act	0.702238	0.681502	2.59307
hmga1a	M01691_2.00	chr22:18260938-18261438	BX664610.1	0.248183	Inter	0.243365	hmga1a->chr22:18260938-18261438->BX664610.1	Act	1.97383	0.681502	2.59307
hmga1a	M01688_2.00	chr22:18262952-18263452	BX664610.1	0.262627	Inter	0.243365	hmga1a->chr22:18262952-18263452->BX664610.1	Act	1.97383	0.681502	0
sox3	M02719_2.00	chr22:18263896-18264396	BX664610.1	0.226865	Inter	0.239397	sox3->chr22:18263896-18264396->BX664610.1	Act	1.41389	0.681502	0
foxp4	M03051_2.00	chr22:18263896-18264396	BX664610.1	0.165253	Inter	0.0693756	foxp4->chr22:18263896-18264396->BX664610.1	Act	1.82548	0.681502	0
sox3	M00199_2.00	chr22:18264666-18265166	BX664610.1	0.0714926	Inter	0.239397	sox3->chr22:18264666-18265166->BX664610.1	Act	1.41389	0.681502	0
hmga1a	M01106_2.00	chr22:18264666-18265166	BX664610.1	0.18297	Inter	0.243365	hmga1a->chr22:18264666-18265166->BX664610.1	Act	1.97383	0.681502	0
foxp4	M06203_2.00	chr22:18264666-18265166	BX664610.1	0.172102	Inter	0.0693756	foxp4->chr22:18264666-18265166->BX664610.1	Act	1.82548	0.681502	0
sox3	M00070_2.00	chr22:18265528-18266028	BX664610.1	0.146922	Inter	0.239397	sox3->chr22:18265528-18266028->BX664610.1	Act	1.41389	0.681502	1.31526
tcf7l1b	M09392_2.00	chr22:18265528-18266028	BX664610.1	0.219956	Inter	0.163184	tcf7l1b->chr22:18265528-18266028->BX664610.1	Act	0.581799	0.681502	1.31526
sox3	M00070_2.00	chr22:18266124-18266624	BX664610.1	0.146922	Inter	0.239397	sox3->chr22:18266124-18266624->BX664610.1	Act	1.41389	0.681502	0
hmga1a	M01689_2.00	chr22:18269286-18269786	BX664610.1	0.158951	Inter	0.243365	hmga1a->chr22:18269286-18269786->BX664610.1	Act	1.97383	0.681502	0
sox3	M05749_2.00	chr22:18275563-18276063	BX664610.1	0.25952	Inter	0.239397	sox3->chr22:18275563-18276063->BX664610.1	Act	1.41389	0.681502	2.39518
sox3	M03515_2.00	chr22:18276279-18276779	BX664610.1	0.0633174	Inter	0.239397	sox3->chr22:18276279-18276779->BX664610.1	Act	1.41389	0.681502	0
hmga1a	M01010	chr22:18281637-18282137	BX664610.1	0.20474	Inter	0.243365	hmga1a->chr22:18281637-18282137->BX664610.1	Act	1.97383	0.681502	0
sox3	M04567	chr22:18281637-18282137	BX664610.1	0.051003	Inter	0.239397	sox3->chr22:18281637-18282137->BX664610.1	Act	1.41389	0.681502	0
foxp4	M00256_2.00	chr22:18281637-18282137	BX664610.1	0.0867577	Inter	0.0693756	foxp4->chr22:18281637-18282137->BX664610.1	Act	1.82548	0.681502	0
tcf7l1b	M09392_2.00	chr22:18281637-18282137	BX664610.1	0.219956	Inter	0.163184	tcf7l1b->chr22:18281637-18282137->BX664610.1	Act	0.581799	0.681502	0
hmga1a	M01683_2.00	chr22:18282726-18283226	BX664610.1	0.0588426	Inter	0.243365	hmga1a->chr22:18282726-18283226->BX664610.1	Act	1.97383	0.681502	0
sox3	M07498_2.00	chr22:18287934-18288434	BX664610.1	0.22568	Inter	0.239397	sox3->chr22:18287934-18288434->BX664610.1	Act	1.41389	0.681502	0
sox3	M07498_2.00	chr22:18290658-18291158	BX664610.1	0.22568	Inter	0.239397	sox3->chr22:18290658-18291158->BX664610.1	Act	1.41389	0.681502	0
olig2	M04186	chr22:18291235-18291735	BX664610.1	0.152052	Inter	0.220613	olig2->chr22:18291235-18291735->BX664610.1	Act	0.702238	0.681502	2.46996
olig2	M10019	chr22:18297072-18297572	BX664610.1	0.0955375	Inter	0.220613	olig2->chr22:18297072-18297572->BX664610.1	Act	0.702238	0.681502	0
hmga1a	M01691_2.00	chr22:18297072-18297572	BX664610.1	0.248183	Inter	0.243365	hmga1a->chr22:18297072-18297572->BX664610.1	Act	1.97383	0.681502	0
olig2	M09703	chr22:18298441-18298941	BX664610.1	0.0747327	Inter	0.220613	olig2->chr22:18298441-18298941->BX664610.1	Act	0.702238	0.681502	3.02161
foxp4	M00160_2.00	chr22:18298441-18298941	BX664610.1	0.0765115	Inter	0.0693756	foxp4->chr22:18298441-18298941->BX664610.1	Act	1.82548	0.681502	3.02161
hmga1a	M02652_2.00	chr22:18298441-18298941	BX664610.1	0.167321	Inter	0.243365	hmga1a->chr22:18298441-18298941->BX664610.1	Act	1.97383	0.681502	3.02161
tcf7l1b	M09400_2.00	chr22:18298441-18298941	BX664610.1	0.195293	Inter	0.163184	tcf7l1b->chr22:18298441-18298941->BX664610.1	Act	0.581799	0.681502	3.02161
sox3	M11331_2.00	chr22:18298441-18298941	BX664610.1	0.19351	Inter	0.239397	sox3->chr22:18298441-18298941->BX664610.1	Act	1.41389	0.681502	3.02161
sox3	M11331_2.00	chr22:18300125-18300625	BX664610.1	0.19351	Inter	0.239397	sox3->chr22:18300125-18300625->BX664610.1	Act	1.41389	0.681502	2.38641
[truncated: 4,495 more rows]
